# Supplementary material for: Modeling gene x environment interactions in PTSD using glucocorticoid-induced transcriptomics in human neurons
Source: Research Square preprint supplement (doi:10.21203/rs.3.rs-267139/v1), 2021-02-25
Supplement: Supplementary file 1 [file 657e5f2a41fe7a6648957351.xlsx]

## Sheet: Baseline differences
	PTSD+vs.PTSD- NGN2-derived neurons					PTSD+vs.PTSD- NGN2-derived neurons
genes	logFC	AveExpr	t	P.Value	adj.P.Val	logFC	AveExpr	t	P.Value	adj.P.Val
SMU1	0.408172	6.33067	5.74268	6.1895e-07	0.0100029	0.0289635	6.33067	0.426196	0.671929	0.924719
MEIS1	-1.02198	5.83516	-4.75323	1.23931e-05	0.100142	0.115633	5.83516	0.811642	0.421014	0.8477
CHCHD2	1.02788	7.3168	4.9094	2.35557e-05	0.126895	0.197563	7.3168	0.987214	0.33139	0.811361
AL080317.1	1.17227	1.43682	4.47388	3.44488e-05	0.139182	0.438535	1.43682	2.19293	0.0329505	0.74447
SLC26A11	-0.511638	5.54052	-4.3251	5.65426e-05	0.182757	0.01152	5.54052	0.113977	0.909627	0.981602
RPL41P1	0.713626	2.21692	4.1411	0.000106325	0.245474	-0.0454655	2.21692	-0.299692	0.765415	0.951108
SRP14P2	-0.940343	1.22778	-4.17912	9.33671e-05	0.245474	0.0495919	1.22778	0.218772	0.827546	0.961754
CBWD4P	-1.61417	-0.227667	-4.00714	0.000245415	0.495769	0.100461	-0.227667	0.279065	0.781917	0.95245
STYXL1	0.417013	4.96048	3.80242	0.000475059	0.511828	0.126639	4.96048	1.22192	0.229521	0.774059
TRMU	-0.382175	4.93369	-3.80426	0.000389633	0.511828	-0.0934258	4.93369	-1.09748	0.279335	0.796883
CDKAL1	0.526828	4.74535	3.94789	0.000407572	0.511828	0.146052	4.74535	0.97988	0.332628	0.811361
GPR143	-1.55098	0.265264	-3.78279	0.000435057	0.511828	0.275403	0.265264	0.937973	0.359224	0.820352
HLA-DRB5	-4.45647	-1.03367	-3.86417	0.000464438	0.511828	0.438843	-1.03367	0.452292	0.655659	0.921371
PCDHB14	-0.645961	4.33995	-3.8112	0.00032606	0.511828	0.0778206	4.33995	0.420424	0.675632	0.927058
ST13P4	-0.982926	0.298787	-3.82261	0.000308646	0.511828	0.0531117	0.298787	0.209336	0.834872	0.963392
AC008525.1	-2.15482	-1.98879	-3.65389	0.000622362	0.589469	1.25388	-1.98879	3.02924	0.00634856	0.74447
PSRC1	-0.833853	4.84839	-3.57506	0.000693021	0.589469	0.0918557	4.84839	0.744822	0.465155	0.864083
ZNHIT3	-0.531637	6.11894	-3.70518	0.000691047	0.589469	-0.0272348	6.11894	-0.183262	0.855483	0.967203
LARS2	-0.569343	5.92455	-3.65567	0.000634052	0.589469	-0.00768255	5.92455	-0.0595955	0.952833	0.98898
ANKRD65	-1.67944	0.138815	-3.49481	0.000893334	0.599759	-1.06531	0.138815	-3.34591	0.00186493	0.74447
AP000766.1	1.13982	0.600051	3.48373	0.000912998	0.599759	0.743975	0.600051	2.55732	0.0130086	0.74447
EFHB	-2.13978	0.168974	-3.4203	0.00111334	0.599759	0.620537	0.168974	1.90744	0.0678624	0.74447
DBN1	-0.429761	8.31801	-3.47644	0.00111232	0.599759	-0.161364	8.31801	-1.41534	0.164433	0.753298
AC127496.5	-2.2521	-1.62418	-3.49889	0.000870779	0.599759	-0.465539	-1.62418	-1.28206	0.204594	0.764527
ALDH7A1P1	-0.975929	1.72884	-3.53891	0.000810666	0.599759	0.203291	1.72884	0.92894	0.358043	0.820241
AL158050.1	-0.824089	-0.00410931	-3.44975	0.0010148	0.599759	-0.207417	-0.00410931	-0.914766	0.363858	0.823171
NKAP	0.504526	2.59362	3.44131	0.00104201	0.599759	-0.0901618	2.59362	-0.861137	0.39261	0.837081
TMEM185A	0.355223	4.65731	3.54932	0.000743291	0.599759	0.0806428	4.65731	0.855764	0.395424	0.837985
SPDYE21P	1.53013	-0.543842	3.44382	0.00103363	0.599759	0.171553	-0.543842	0.613649	0.541692	0.889033
ARPC3P5	-0.748587	1.31602	-3.46501	0.00098689	0.599759	-0.119553	1.31602	-0.592406	0.555793	0.894458
TRAPPC4	-0.399843	7.02257	-3.41076	0.00138464	0.600728	-0.199709	7.02257	-1.72898	0.0906123	0.74447
COX20	0.597063	2.09471	3.38899	0.00122419	0.600728	0.25195	2.09471	1.48647	0.142223	0.751261
MDM4	0.759867	4.7827	3.39912	0.00130001	0.600728	-0.077528	4.7827	-0.45529	0.652051	0.920453
HAUS3	0.50047	4.40569	3.36606	0.00131612	0.600728	0.0556183	4.40569	0.422918	0.673827	0.926054
ATP6V0E2	-0.307975	8.22534	-3.5412	0.00131262	0.600728	-0.0167991	8.22534	-0.195734	0.846145	0.966697
ZNF295-AS1	-2.30678	-0.927283	-3.35656	0.00135207	0.600728	-0.0539915	-0.927283	-0.147877	0.883365	0.974808
MSNP1	-1.95507	-0.0493095	-3.38273	0.00125031	0.600728	0.0483478	-0.0493095	0.146027	0.884501	0.9749
C1RL	-1.37332	0.861174	-3.34265	0.00141252	0.600728	0.00828489	0.861174	0.0375128	0.970251	0.993229
DCAKD	-0.535005	6.44083	-3.36488	0.00177884	0.608251	0.245313	6.44083	1.67666	0.103636	0.74447
PRKN	-0.750987	3.4737	-3.26819	0.00182783	0.608251	0.388242	3.4737	2.06957	0.043832	0.74447
SIRT5	0.441455	4.12671	3.19864	0.00218218	0.608251	0.176416	4.12671	1.42628	0.158838	0.752666
AVPR1A	-2.17475	0.483576	-3.24662	0.00188717	0.608251	-0.489465	0.483576	-1.2763	0.210335	0.765936
MIR181A2HG	1.05591	1.43489	3.36934	0.00200101	0.608251	0.405354	1.43489	1.22571	0.227984	0.771935
NFYC-AS1	1.03085	1.09856	3.23971	0.00195088	0.608251	0.322778	1.09856	1.21841	0.228223	0.772084
AC008764.8	1.46759	0.0503934	3.21684	0.00206551	0.608251	0.376239	0.0503934	1.20067	0.23564	0.776619
CFLAR	0.5591	4.18254	3.30633	0.00188865	0.608251	0.202749	4.18254	1.19561	0.237976	0.77828
GRID2	-1.62625	3.1128	-3.32366	0.00149643	0.608251	-0.252656	3.1128	-1.15244	0.267213	0.795018
PHKA1	-0.60081	4.00989	-3.36831	0.00151539	0.608251	-0.176822	4.00989	-1.1091	0.274099	0.796883
AC104581.4	1.20392	-0.0396368	3.22136	0.00203411	0.608251	0.254871	-0.0396368	0.949471	0.346405	0.815476
LRPAP1	-0.351804	6.47228	-3.21449	0.00210607	0.608251	0.0504264	6.47228	0.534339	0.595179	0.902232
B9D1	-0.55702	4.54721	-3.19606	0.00223727	0.608251	0.0690496	4.54721	0.466884	0.642432	0.917492
PMFBP1	-0.685468	1.07167	-3.28361	0.00198855	0.608251	0.171454	1.07167	0.462261	0.645536	0.918591
AL139353.2	1.33517	0.118594	3.31563	0.00154879	0.608251	0.121167	0.118594	0.414009	0.680784	0.927771
TBC1D19	0.311249	5.60043	3.2243	0.00219723	0.608251	-0.0378505	5.60043	-0.372972	0.710562	0.936426
AC114491.1	-0.577455	3.42139	-3.18616	0.00225822	0.608251	0.0775691	3.42139	0.342207	0.733353	0.942131
USP27X-AS1	-1.62335	0.178033	-3.21605	0.00206618	0.608251	0.0920124	0.178033	0.312194	0.755941	0.948351
FBXO44	-0.353871	5.47561	-3.22033	0.00216433	0.608251	0.0234057	5.47561	0.207103	0.836652	0.963566
LYPLA2P1	-0.907371	1.04166	-3.28056	0.00189936	0.608251	0.0646554	1.04166	0.203019	0.839813	0.965126
SURF1	0.443463	6.0338	3.34055	0.00168333	0.608251	0.0135714	6.0338	0.112603	0.910929	0.981779
NME7	0.44478	5.70165	3.26245	0.00179826	0.608251	-0.0017693	5.70165	-0.0150138	0.988069	0.997202
CASC9	1.20862	0.934211	3.15157	0.0025191	0.626325	0.261061	0.934211	1.23894	0.220547	0.768545
PPIL3	0.70335	4.91557	3.24603	0.00241362	0.626325	0.100624	4.91557	0.492133	0.625702	0.913023
AC074194.1	1.44072	0.315859	3.15286	0.00250061	0.626325	0.130538	0.315859	0.40304	0.688684	0.929126
COX6A1P2	-0.642849	4.10544	-3.18272	0.00239458	0.626325	0.0632147	4.10544	0.245218	0.807098	0.957744
SPACA6	-1.20033	0.325001	-3.15133	0.00250305	0.626325	0.0299695	0.325001	0.13675	0.891672	0.977004
AL109766.1	-0.941826	0.678334	-3.14937	0.00258013	0.631781	0.0896724	0.678334	0.27715	0.78259	0.95245
CEP350	0.459009	5.70918	3.11672	0.00346952	0.638635	0.238351	5.70918	1.9326	0.0653417	0.74447
KIF6	-0.953577	0.687471	-3.06555	0.0035673	0.638635	0.682173	0.687471	2.42382	0.0197742	0.74447
KMT2E-AS1	-0.763014	0.293347	-3.01778	0.00373263	0.638635	0.511472	0.293347	2.1637	0.0344359	0.74447
MET	-0.730823	3.29368	-3.1761	0.00363579	0.638635	-0.807531	3.29368	-2.27309	0.0266179	0.74447
MT-ND6	0.634271	8.26512	3.09059	0.00314582	0.638635	0.382541	8.26512	2.07051	0.0435786	0.74447
ORAI2	-0.294096	6.64569	-3.17964	0.00325986	0.638635	-0.188779	6.64569	-2.19891	0.0368414	0.74447
PACRG	-0.963714	3.37888	-3.0549	0.00331806	0.638635	0.382068	3.37888	1.78078	0.0804905	0.74447
SECISBP2	0.302263	5.47843	3.10549	0.00324205	0.638635	0.230764	5.47843	2.56894	0.013906	0.74447
FABP6	-0.866915	1.66749	-3.23487	0.00372233	0.638635	1.19898	1.66749	1.4198	0.160933	0.752666
PAX8-AS1	2.34621	3.57722	3.07124	0.00379364	0.638635	-0.585157	3.57722	-0.752593	0.455695	0.860194
AC007485.2	0.541345	2.82973	3.08982	0.0035203	0.638635	0.144845	2.82973	0.742523	0.461045	0.862266
RANP1	-0.645041	2.14407	-3.11863	0.00284732	0.638635	0.152655	2.14407	0.699235	0.487057	0.870032
UGP2	0.281712	6.81467	3.08121	0.00327341	0.638635	-0.0497271	6.81467	-0.583363	0.562247	0.896176
C11orf49	-0.245682	7.09748	-3.09675	0.00340744	0.638635	0.0425479	7.09748	0.577101	0.567184	0.897587
AC023512.1	-0.63839	2.28957	-3.02169	0.00365011	0.638635	0.123254	2.28957	0.540556	0.590751	0.901109
AC097359.2	0.876875	1.00739	3.10166	0.00289553	0.638635	-0.124901	1.00739	-0.526507	0.600415	0.904147
PEAK1	0.566049	4.79851	3.01433	0.00372813	0.638635	0.0898392	4.79851	0.455946	0.650022	0.919584
AC090602.1	-0.875434	1.16879	-3.04411	0.00367331	0.638635	0.119335	1.16879	0.440271	0.661643	0.92207
TEAD3	-1.80227	1.46761	-3.08316	0.0031883	0.638635	-0.0633061	1.46761	-0.440622	0.661306	0.92207
ATP6V0C	1.03571	0.466107	3.06684	0.00321251	0.638635	0.118451	0.466107	0.385054	0.701525	0.933499
PCED1A	-0.392781	5.25198	-3.18215	0.0035421	0.638635	-0.0375839	5.25198	-0.344122	0.734491	0.942131
HSPA8P9	-0.838839	0.844047	-3.03739	0.00348892	0.638635	0.111813	0.844047	0.324472	0.746673	0.945176
PGGHG	-2.03296	0.688623	-3.06373	0.00328406	0.638635	-0.0555931	0.688623	-0.259115	0.79765	0.955937
B4GAT1	-0.355961	8.22109	-3.17625	0.00281919	0.638635	-0.0252905	8.22109	-0.240652	0.811151	0.959028
FOXRED1	-0.356656	5.50267	-3.03551	0.00370529	0.638635	-0.0245932	5.50267	-0.218193	0.828107	0.961993
MT-TN	1.15734	3.08973	3.0181	0.00378103	0.638635	-0.09399	3.08973	-0.217603	0.828455	0.962038
ZDHHC12	-0.601304	3.86342	-3.07134	0.00320025	0.638635	0.0255004	3.86342	0.175907	0.861142	0.969638
ST13P5	-0.820364	0.406047	-3.10247	0.00314555	0.638635	0.041286	0.406047	0.161724	0.872169	0.972267
LINC01006	0.576834	4.20396	3.27432	0.00376062	0.638635	0.0121527	4.20396	0.0640164	0.949443	0.988513
RPL21P120	-0.647965	1.30365	-3.0167	0.00372632	0.638635	0.000421009	1.30365	0.00203257	0.998385	0.999663
CIRBP	-0.290354	7.75781	-3.00172	0.00390033	0.639651	0.121822	7.75781	1.31343	0.19394	0.762125
HERC2P2	1.12771	3.551	2.99773	0.00391841	0.639651	0.124955	3.551	0.769323	0.448896	0.858453
SLC38A10	-0.48023	5.78495	-3.05149	0.00389389	0.639651	-0.0433896	5.78495	-0.336793	0.738931	0.943425
AL035530.2	0.704548	1.87944	2.99712	0.00398859	0.644597	-0.185167	1.87944	-0.695642	0.489255	0.871266
INPP4B	-0.921673	2.79336	-3.03409	0.00408008	0.652853	-0.155444	2.79336	-0.491537	0.625258	0.913023
SYCE3	-1.44862	-0.110593	-2.99711	0.00417833	0.657873	0.567486	-0.110593	1.28023	0.206601	0.764527
POMGNT1	-0.318848	7.34262	-3.03851	0.00423357	0.657873	-0.0463657	7.34262	-0.476754	0.636653	0.915918
NAIF1	-0.350982	2.89713	-2.97733	0.00422866	0.657873	0.00775349	2.89713	0.0720914	0.942782	0.986148
HNRNPA1P4	-0.868698	-0.151951	-2.9587	0.00436944	0.672519	-0.0508869	-0.151951	-0.196232	0.845071	0.966675
PELI1	0.369078	7.32163	2.9571	0.00454055	0.692263	-0.306361	7.32163	-2.53491	0.0140235	0.74447
MAGED4	-0.55381	4.09687	-2.9258	0.00494642	0.698247	0.264682	4.09687	1.5017	0.138856	0.749732
ORC3	0.185472	6.32179	2.94728	0.00482563	0.698247	0.0736598	6.32179	1.20767	0.232724	0.776218
PLXNA2	-0.59677	5.80561	-2.93196	0.00492695	0.698247	-0.16695	5.80561	-1.04801	0.30144	0.80233
TRIM61	1.30462	0.560502	3.26496	0.00475778	0.698247	-0.834404	0.560502	-1.03408	0.305142	0.804349
TMEM233	-1.28965	-0.944014	-3.31423	0.00465619	0.698247	0.543135	-0.944014	0.871794	0.387304	0.833039
CAPS	-1.09243	0.723559	-2.95561	0.00488553	0.698247	0.219332	0.723559	0.863848	0.39981	0.839614
PHACTR4	0.484765	4.93666	2.92914	0.00475074	0.698247	0.0835046	4.93666	0.807334	0.423449	0.849156
C13orf46	-1.71689	0.320454	-2.91725	0.00496865	0.698247	-0.115344	0.320454	-0.34997	0.730123	0.941064
RPS23P8	-0.557906	2.6194	-2.92167	0.00493589	0.698247	-0.0123783	2.6194	-0.0582032	0.953774	0.989114
CDCA2	-1.73993	2.1058	-2.90686	0.00505819	0.704702	-0.350618	2.1058	-1.47739	0.164278	0.753298
CAVIN1	-3.02014	2.60538	-2.89347	0.00536234	0.70984	-0.555924	2.60538	-2.1209	0.0479307	0.74447
FTX	0.622476	4.88974	2.8909	0.00547152	0.70984	0.47534	4.88974	2.48786	0.0161758	0.74447
KCND1	-1.04813	2.36125	-2.94556	0.00534482	0.70984	-0.324779	2.36125	-1.01062	0.319753	0.809684
RPS13P2	-0.562926	2.61286	-2.89312	0.00535704	0.70984	0.212848	2.61286	0.953585	0.343998	0.814356
TCP1	0.172845	8.47444	2.9126	0.00547441	0.70984	-0.0482897	8.47444	-0.834764	0.408089	0.844795
BRIX1	0.274214	5.19606	2.90574	0.00537027	0.70984	-0.07078	5.19606	-0.780569	0.438607	0.855573
RNF2	0.420368	6.53308	3.03575	0.00549038	0.70984	-0.0415986	6.53308	-0.293109	0.771608	0.951897
GALNT15	-0.886151	1.897	-2.95763	0.00538715	0.70984	-0.081121	1.897	-0.238521	0.812467	0.959216
FAM66A	1.18892	1.87505	2.8939	0.00531798	0.70984	-0.000247749	1.87505	-0.00067843	0.999461	0.999718
AC025159.1	0.722544	2.18332	2.73225	0.00859133	0.721885	0.4375	2.18332	1.80145	0.0779347	0.74447
AC114971.1	-2.05081	-1.1779	-2.69872	0.00900127	0.721885	-0.753603	-1.1779	-1.59187	0.121297	0.74447
ASH1L	0.431957	5.66202	2.98664	0.0061956	0.721885	0.275846	5.66202	2.17845	0.0445012	0.74447
GABPB2	-1.0569	0.958052	-2.84038	0.00609022	0.721885	0.341833	0.958052	1.58487	0.120103	0.74447
MAGED4B	-0.53623	3.74004	-2.8002	0.00693678	0.721885	0.377698	3.74004	2.12473	0.037957	0.74447
MT-ND4	0.417514	10.6485	2.76971	0.00764148	0.721885	0.240087	10.6485	1.70076	0.0947965	0.74447
MT-ND5	0.464948	10.0843	2.84902	0.00628937	0.721885	0.376722	10.0843	2.48009	0.016649	0.74447
NHLRC1	1.02819	0.664673	2.76301	0.00769	0.721885	-1.09606	0.664673	-2.22087	0.03004	0.74447
NKTR	0.485294	4.97207	2.70677	0.00878971	0.721885	0.277491	4.97207	2.41072	0.0207184	0.74447
SLC39A1	1.40603	-0.0893216	2.81433	0.00657932	0.721885	-0.45661	-0.0893216	-1.58763	0.117687	0.74447
TMEM205	-0.389032	5.37789	-2.78912	0.0071811	0.721885	0.279121	5.37789	2.14686	0.0361417	0.74447
TRAF6	0.29621	4.71342	2.75073	0.00824055	0.721885	0.201263	4.71342	1.8891	0.0644482	0.74447
USP7	0.313138	4.85081	2.69257	0.00928487	0.721885	0.172145	4.85081	1.72904	0.0898614	0.74447
WDR46	-0.278839	5.24847	-2.73675	0.00813177	0.721885	-0.183405	5.24847	-2.12646	0.0377487	0.74447
PTMAP2	-0.715623	2.41308	-2.76008	0.00794896	0.721885	0.379514	2.41308	1.343	0.18438	0.758258
TEDC1	0.59408	2.09646	2.68509	0.00929101	0.721885	-0.202691	2.09646	-1.32388	0.190799	0.760902
COX17P1	-0.66709	0.972371	-2.81716	0.00649122	0.721885	-0.347934	0.972371	-1.30187	0.197778	0.762421
ELK4	0.641159	2.32333	2.86686	0.00579425	0.721885	0.245847	2.32333	1.31651	0.194188	0.762421
COL27A1	-2.16389	0.707849	-2.75967	0.00770629	0.721885	-0.521514	0.707849	-1.33302	0.208732	0.764527
AC242376.2	0.957484	1.06115	2.76366	0.00772429	0.721885	0.303708	1.06115	1.18844	0.242719	0.782425
DNAH14	0.545935	3.83545	2.87018	0.00686339	0.721885	0.217383	3.83545	1.17517	0.248019	0.784679
CDKL3	0.676203	1.29066	2.79818	0.00683881	0.721885	0.203224	1.29066	1.15587	0.252383	0.787065
SCRN2	-0.479057	4.65568	-2.73059	0.00873087	0.721885	0.142207	4.65568	1.0687	0.294505	0.798861
SLC36A1	-0.462351	4.92343	-2.73471	0.00878909	0.721885	-0.22117	4.92343	-1.03635	0.304154	0.803697
PTGES3	0.211146	8.74318	2.72407	0.00863403	0.721885	-0.0773347	8.74318	-1.01888	0.312616	0.807507
EFS	-2.05795	-0.29948	-2.80743	0.00681961	0.721885	-0.230348	-0.29948	-0.948448	0.346991	0.816144
CSE1L	0.229224	8.078	2.69746	0.00910032	0.721885	-0.0753749	8.078	-0.927544	0.357384	0.819711
AC010624.1	-1.7036	-0.204134	-2.8562	0.00588059	0.721885	0.417811	-0.204134	0.851535	0.398197	0.839154
RND2	-0.359573	6.58568	-2.76053	0.00818607	0.721885	0.107361	6.58568	0.843616	0.403102	0.842266
AP1B1	-0.406611	6.26774	-2.79274	0.00782473	0.721885	-0.10485	6.26774	-0.836627	0.409423	0.844929
FAM104B	0.267107	4.60663	2.78408	0.0073679	0.721885	0.0675313	4.60663	0.759892	0.450729	0.858567
TUBA1C	-0.719097	6.2637	-2.84327	0.0065677	0.721885	0.179918	6.2637	0.713561	0.478856	0.86766
AC132938.3	-1.04097	0.393393	-2.70086	0.00890602	0.721885	0.224914	0.393393	0.70641	0.48258	0.869534
CYP51A1P2	-0.527963	1.81656	-2.76572	0.00747332	0.721885	0.207468	1.81656	0.700209	0.486416	0.869994
RPL24P4	-0.541777	1.73045	-2.76177	0.0075542	0.721885	0.149956	1.73045	0.698136	0.487703	0.870205
LTBP4	-0.705095	3.73294	-2.82176	0.00640965	0.721885	0.0964723	3.73294	0.674589	0.503796	0.87737
ARHGAP4	-1.17759	0.484507	-2.84737	0.00614405	0.721885	0.204705	0.484507	0.65398	0.51706	0.880586
BZW1P2	-0.345357	3.75922	-2.83325	0.00625855	0.721885	0.0786441	3.75922	0.632644	0.529295	0.886235
SYT17	-0.975021	3.79519	-2.89893	0.00682273	0.721885	0.228089	3.79519	0.623426	0.536566	0.88785
GFRA3	-1.12388	0.348732	-2.87023	0.00799957	0.721885	0.441476	0.348732	0.61519	0.540683	0.888964
SPDYE1	1.43849	-0.732871	2.7982	0.00685416	0.721885	0.191085	-0.732871	0.584354	0.56121	0.895745
TMEM102	-1.94706	-0.739788	-2.69986	0.00893	0.721885	-0.230171	-0.739788	-0.579613	0.564276	0.896595
ARL2BP	0.483021	3.32193	2.80086	0.00678869	0.721885	0.0904491	3.32193	0.513596	0.60936	0.907859
RIBC2	-1.86466	-1.44634	-2.69221	0.0091283	0.721885	-0.205127	-1.44634	-0.502767	0.618375	0.909675
TCEAL5	-0.732401	2.39552	-2.91764	0.00926693	0.721885	-0.189066	2.39552	-0.495782	0.622136	0.911627
CICP14	1.41413	-0.302496	2.86189	0.00575083	0.721885	0.122461	-0.302496	0.469818	0.640669	0.916582
HSD3B7	-1.06115	1.40453	-2.84838	0.00595847	0.721885	0.121936	1.40453	0.466566	0.642719	0.917497
ENAH	0.49452	6.85542	2.87262	0.0061636	0.721885	-0.0722679	6.85542	-0.460495	0.647703	0.919319
TOMM20	0.219815	8.06345	2.80761	0.00791951	0.721885	-0.0351617	8.06345	-0.455647	0.65131	0.920122
AC246787.1	-0.638216	1.11079	-2.69702	0.00899811	0.721885	0.10164	1.11079	0.414923	0.67963	0.927771
SEMA5A	-1.23447	4.07559	-2.71005	0.00904139	0.721885	-0.12734	4.07559	-0.412324	0.683986	0.927808
AC024896.1	1.5295	-0.378383	2.78254	0.00713819	0.721885	-0.11744	-0.378383	-0.404744	0.687059	0.929033
DGKK	-1.41502	-1.08638	-2.74063	0.00890329	0.721885	0.318622	-1.08638	0.40305	0.688299	0.929126
GABPB1	0.221377	5.38273	2.7841	0.00739465	0.721885	-0.032045	5.38273	-0.40272	0.688679	0.929126
MSH3	0.379668	4.87731	2.71163	0.00891858	0.721885	-0.0482027	4.87731	-0.401104	0.690161	0.929178
BLZF1	0.360934	5.00283	2.83063	0.00626349	0.721885	0.036147	5.00283	0.355301	0.723631	0.939854
TMEM255B	-1.43457	2.33833	-2.95356	0.00808654	0.721885	-0.208676	2.33833	-0.349894	0.72842	0.940648
YWHAZP2	-0.474207	2.77552	-2.7211	0.0087343	0.721885	-0.076223	2.77552	-0.336235	0.737831	0.943281
UTRN	-0.740175	4.7264	-2.75351	0.00812286	0.721885	-0.0647061	4.7264	-0.303674	0.763217	0.951108
RPL26P30	-0.693266	1.69304	-2.7448	0.00797948	0.721885	0.0707972	1.69304	0.296125	0.768146	0.95125
QPRT	-0.44476	6.05888	-2.7061	0.00907366	0.721885	-0.037541	6.05888	-0.268082	0.789844	0.954581
C6orf62	0.407241	7.66842	2.74844	0.00803681	0.721885	0.0365563	7.66842	0.26295	0.793566	0.954778
BLOC1S5	0.307223	4.30223	2.81343	0.00665698	0.721885	-0.0239753	4.30223	-0.258762	0.796812	0.955642
CNOT10	0.217239	5.71817	2.7554	0.00778288	0.721885	-0.0182956	5.71817	-0.250998	0.80269	0.957018
XRN2	0.231292	6.73802	2.72562	0.00866723	0.721885	-0.0181631	6.73802	-0.23036	0.818736	0.960025
PIGQ	-0.370659	5.04952	-2.91163	0.00601474	0.721885	0.0203133	5.04952	0.198743	0.844465	0.966629
AIMP1	0.283326	4.8818	2.73368	0.0081741	0.721885	-0.0158964	4.8818	-0.18666	0.852574	0.967203
HSPA8P5	-0.593714	2.35909	-2.68593	0.00926957	0.721885	-0.0530881	2.35909	-0.188531	0.851076	0.967203
AC092747.4	1.17699	0.689657	2.73626	0.00809563	0.721885	0.051911	0.689657	0.163054	0.871006	0.972204
ELL	-0.314544	3.37061	-2.78914	0.00701215	0.721885	-0.0125632	3.37061	-0.137211	0.891317	0.976985
E4F1	-0.311059	4.59765	-2.80975	0.00662497	0.721885	-0.0119032	4.59765	-0.13331	0.89438	0.977862
CNOT7	0.193405	7.64927	2.73187	0.00833216	0.721885	0.00867543	7.64927	0.126775	0.89955	0.979193
ZCCHC7	0.285879	5.03357	2.72557	0.00833279	0.721885	0.0132919	5.03357	0.126685	0.899599	0.979193
TUBBP2	-0.794587	2.18149	-2.74783	0.00848709	0.721885	-0.0430258	2.18149	-0.123746	0.901931	0.980099
EXOSC3	0.319975	4.7637	2.71409	0.00896356	0.721885	-0.011122	4.7637	-0.10963	0.913206	0.98182
CACYBP	0.248881	7.37276	2.87408	0.00571647	0.721885	0.00805997	7.37276	0.0965708	0.923407	0.98377
NOP58	0.258076	5.76176	2.85806	0.00655456	0.721885	0.00653449	5.76176	0.0793724	0.937174	0.984857
AL133367.1	1.18811	0.427203	2.80747	0.00688952	0.721885	-0.0108554	0.427203	-0.0322944	0.974396	0.994291
RIPOR2	0.452117	5.74623	2.76166	0.00882417	0.721885	0.00363444	5.74623	0.0230925	0.981706	0.995498
QDPR	-0.33812	6.75111	-2.82926	0.00715532	0.721885	0.0022096	6.75111	0.0188645	0.98504	0.99594
MZT2A	0.480125	5.34179	2.75867	0.00860066	0.721885	-0.00304643	5.34179	-0.0172228	0.986335	0.996451
PAQR7	-1.10958	2.22288	-2.91456	0.00737856	0.721885	-0.00466957	2.22288	-0.0117223	0.990726	0.99764
CEP295	0.486896	3.42698	2.71169	0.00868843	0.721885	-0.00118153	3.42698	-0.00880957	0.993006	0.998194
TOR1B	0.651814	4.49117	2.7794	0.00942181	0.728545	-0.387727	4.49117	-1.71404	0.0980953	0.74447
GGPS1	0.28779	5.51184	2.67674	0.00949988	0.731083	-0.0432338	5.51184	-0.412452	0.681431	0.927771
ATXN3	0.306949	4.59659	2.72886	0.00954578	0.731134	0.222718	4.59659	1.94287	0.0588187	0.74447
KATNBL1	0.322677	5.88731	2.68467	0.00966209	0.736552	-0.00475278	5.88731	-0.0436987	0.965323	0.992497
AC018521.5	-0.483434	2.80027	-2.5058	0.0160846	0.736777	0.528442	2.80027	2.44379	0.0178351	0.74447
AC021078.1	0.397153	2.66684	2.28801	0.025559	0.736777	0.24104	2.66684	1.87651	0.0652937	0.74447
AC134043.2	0.505611	0.862599	2.28489	0.0257529	0.736777	-0.856881	0.862599	-2.27014	0.0266856	0.74447
AL512844.1	-0.495277	1.56626	-2.34216	0.0235906	0.736777	0.546454	1.56626	2.35644	0.0220758	0.74447
AP000873.2	0.542758	2.75284	2.30663	0.0248352	0.736777	0.50276	2.75284	2.47438	0.0169135	0.74447
ATG9B	0.751884	1.72888	2.73838	0.0102237	0.736777	-0.734127	1.72888	-1.93778	0.0575318	0.74447
C1orf131	0.332169	3.76498	2.31383	0.0243598	0.736777	0.417533	3.76498	3.30231	0.00175382	0.74447
CNOT4	0.257852	6.0576	2.5826	0.0124056	0.736777	0.248387	6.0576	2.56705	0.0128599	0.74447
COLQ	-1.44997	0.089479	-2.30328	0.024686	0.736777	0.560286	0.089479	1.69984	0.0951555	0.74447
COX7CP1	-0.524036	2.15657	-2.33146	0.0234918	0.736777	0.563111	2.15657	2.26346	0.0272025	0.74447
DBNL	-0.450808	6.71868	-2.35622	0.0260318	0.736777	-0.314857	6.71868	-1.74058	0.0952545	0.74447
EN2	2.94716	0.744889	2.38318	0.0205578	0.736777	-0.909014	0.744889	-2.78027	0.00758077	0.74447
FBXO25	0.268056	5.44631	2.54604	0.0146577	0.736777	0.282459	5.44631	2.63845	0.011365	0.74447
FGF5	1.03215	-0.567371	2.28127	0.0259788	0.736777	1.54167	-0.567371	1.90022	0.0620568	0.74447
GTPBP10	0.316644	4.1704	2.62936	0.0117869	0.736777	0.229969	4.1704	1.89713	0.0640654	0.74447
HNRNPCP2	-0.364906	3.80255	-2.465	0.0164848	0.736777	0.242799	3.80255	1.88447	0.0641913	0.74447
HNRNPKP4	-0.368058	3.65471	-2.32709	0.0232414	0.736777	0.295473	3.65471	2.05423	0.0441752	0.74447
LINC01993	-1.25699	0.279465	-2.33498	0.0228198	0.736777	0.631086	0.279465	2.09761	0.0448233	0.74447
LYRM1	0.208626	5.57033	2.42435	0.0196628	0.736777	0.145137	5.57033	1.69276	0.0975689	0.74447
MALAT1	0.502773	11.0296	2.35082	0.0250522	0.736777	0.540938	11.0296	2.67089	0.0124558	0.74447
MIPEPP3	0.50879	2.28091	2.42773	0.0197038	0.736777	0.361784	2.28091	1.84729	0.0729642	0.74447
NAB2	-0.353003	4.83841	-2.47682	0.0187606	0.736777	-0.279425	4.83841	-1.9183	0.0633269	0.74447
NR2F1	-1.52268	2.68528	-2.60873	0.0114345	0.736777	0.663609	2.68528	2.23576	0.0398664	0.74447
PARP10	-1.46915	1.43135	-2.43007	0.0181701	0.736777	-0.439685	1.43135	-1.88063	0.0661609	0.74447
PCDHGB2	0.953254	0.531564	2.49631	0.0152218	0.736777	-0.580935	0.531564	-1.8376	0.0709136	0.74447
PHKG1	1.5496	-1.26335	2.30755	0.0243768	0.736777	0.674317	-1.26335	1.81738	0.0768393	0.74447
PNMA8C	-0.377841	3.76138	-2.67355	0.0104516	0.736777	0.383038	3.76138	2.37254	0.0211134	0.74447
PRR14L	0.219846	6.00966	2.50567	0.0150454	0.736777	0.131306	6.00966	1.61555	0.111672	0.74447
RBM3	0.255417	6.96349	2.45827	0.0178682	0.736777	-0.264435	6.96349	-2.64759	0.0112388	0.74447
RBMXP2	-0.561451	0.831386	-2.46277	0.0167419	0.736777	0.351646	0.831386	1.56543	0.122709	0.74447
RNPC3	0.416314	3.90436	2.54096	0.0144413	0.736777	0.364223	3.90436	2.62316	0.0129837	0.74447
RPSAP15	-0.584433	1.0749	-2.57563	0.0124038	0.736777	0.424811	1.0749	1.69783	0.0945544	0.74447
SUB1P3	-0.736631	0.0397236	-2.55198	0.0131899	0.736777	0.481955	0.0397236	1.73271	0.0881199	0.74447
TECRP1	-0.460732	3.48395	-2.54359	0.0150851	0.736777	0.263861	3.48395	1.61835	0.115949	0.74447
TENT4A	0.472588	2.81623	2.38126	0.0203536	0.736777	-0.417102	2.81623	-3.10408	0.0029038	0.74447
TRIM62	-0.54063	3.70613	-2.59711	0.0119449	0.736777	-0.362368	3.70613	-2.11759	0.0395572	0.74447
TSPAN31	-0.312875	5.39	-2.64988	0.0111272	0.736777	0.202063	5.39	1.87262	0.068813	0.74447
UGDH-AS1	0.541216	1.60805	2.28138	0.0259971	0.736777	0.379302	1.60805	2.05419	0.044581	0.74447
VEPH1	1.53792	1.71595	2.49436	0.015312	0.736777	0.505455	1.71595	2.16009	0.047157	0.74447
WASH7P	0.796953	-0.0580665	2.32138	0.0236182	0.736777	-0.530831	-0.0580665	-1.91341	0.06077	0.74447
YKT6	-0.212306	6.95991	-2.35353	0.0247893	0.736777	-0.197508	6.95991	-2.27663	0.0301279	0.74447
ZNF432	0.488988	4.08915	2.61762	0.0111692	0.736777	0.343731	4.08915	2.83086	0.00751777	0.74447
ZNF595	0.629172	4.43109	2.73731	0.0109905	0.736777	0.383872	4.43109	1.72058	0.0980823	0.74447
C4A	-1.84675	0.0772261	-2.34567	0.0222279	0.736777	0.4977	0.0772261	1.6073	0.124436	0.744994
AC012645.1	0.693822	1.28103	2.4823	0.0164146	0.736777	0.447025	1.28103	1.53154	0.131307	0.746138
CDK5RAP1	-0.16441	5.27933	-2.29661	0.0250325	0.736777	-0.102376	5.27933	-1.52412	0.132562	0.746138
SLC25A51	0.416789	3.50715	2.6737	0.0104632	0.736777	0.281686	3.50715	1.53689	0.129855	0.746138
AC090833.1	-2.2961	-1.0788	-2.67351	0.010103	0.736777	-0.890906	-1.0788	-1.54605	0.139318	0.749732
PYGL	-0.983423	3.191	-2.39488	0.0196611	0.736777	-0.2725	3.191	-1.56384	0.138931	0.749732
DNAJC13	0.348335	4.88016	2.34093	0.0227428	0.736777	-0.176771	4.88016	-1.4951	0.141912	0.751261
SUPT20H	0.23963	6.5801	2.34288	0.0232494	0.736777	-0.138765	6.5801	-1.4932	0.142648	0.751446
ANKRD36B	0.550908	4.25975	2.48283	0.0188788	0.736777	0.298858	4.25975	1.4921	0.149844	0.752666
ILK	0.562165	2.01877	2.62995	0.0107629	0.736777	-0.20202	2.01877	-1.45408	0.151402	0.752666
RARS	0.229975	6.91326	2.3572	0.0219041	0.736777	-0.132326	6.91326	-1.44065	0.155243	0.752666
SLC10A7	0.293755	4.27145	2.41833	0.019767	0.736777	0.181211	4.27145	1.45667	0.151682	0.752666
WWOX	-0.446857	4.21112	-2.30519	0.0255969	0.736777	0.220656	4.21112	1.43692	0.161622	0.752666
ZNF485	0.440011	2.44442	2.4559	0.0177159	0.736777	0.307411	2.44442	1.45794	0.150121	0.752666
AC097263.1	-0.612256	0.826087	-2.33374	0.0229476	0.736777	0.343473	0.826087	1.39641	0.167663	0.753715
SH3YL1	0.397929	3.88972	2.34621	0.0221959	0.736777	0.138241	3.88972	1.39464	0.169186	0.754818
EEF1A1P5	-0.443442	7.07278	-2.38604	0.0201956	0.736777	0.255961	7.07278	1.38456	0.171187	0.755204
SLC22A3	-2.53969	-0.819	-2.4572	0.0175854	0.736777	-0.961621	-0.819	-1.42446	0.174028	0.755544
AC080023.2	-0.784849	0.0966706	-2.46641	0.0164258	0.736777	0.412124	0.0966706	1.35858	0.179203	0.755938
EIF3J-DT	-0.271638	4.26114	-2.48057	0.0158455	0.736777	0.162123	4.26114	1.35727	0.179615	0.755938
SMC3	0.278356	6.36033	2.59798	0.0128589	0.736777	0.129374	6.36033	1.35039	0.18592	0.758619
TCN2	-0.549684	5.0073	-2.52201	0.0148393	0.736777	-0.22836	5.0073	-1.35215	0.186057	0.758619
CDH20	-1.30554	1.38958	-2.56436	0.0128644	0.736777	0.294133	1.38958	1.32347	0.191514	0.760902
SLC12A4	-1.0946	3.52176	-2.44256	0.0175072	0.736777	-0.214484	3.52176	-1.33379	0.199582	0.762421
AC008946.1	-1.11728	-0.087353	-2.51061	0.0146745	0.736777	-0.534968	-0.087353	-1.27706	0.206344	0.764527
ARHGEF1	0.584782	3.29238	2.48346	0.0161023	0.736777	-0.190397	3.29238	-1.30671	0.207624	0.764527
FAM45BP	-0.527573	1.39917	-2.44542	0.0173473	0.736777	0.254526	1.39917	1.27686	0.206424	0.764527
NPIPB4	-1.03198	0.374497	-2.41619	0.0186423	0.736777	0.312713	0.374497	1.27948	0.205495	0.764527
SRSF1	0.267347	5.56573	2.55487	0.0132178	0.736777	-0.11585	5.56573	-1.27335	0.208169	0.764527
PCDHB9	0.656775	2.14923	2.59171	0.0152028	0.736777	0.347649	2.14923	1.26675	0.213666	0.766649
AF201337.1	-1.19487	0.113394	-2.48834	0.0155409	0.736777	-0.407627	0.113394	-1.23811	0.221313	0.768545
EIF4A1	0.575809	1.59361	2.59766	0.0117099	0.736777	-0.239735	1.59361	-1.24173	0.219012	0.768545
AC007996.1	1.23762	-0.349363	2.36928	0.020958	0.736777	0.444638	-0.349363	1.2309	0.22387	0.769628
CYB5D2	-0.32978	6.41428	-2.60009	0.0126289	0.736777	0.149423	6.41428	1.23502	0.223706	0.769628
CLU	-0.718973	9.0282	-2.33484	0.0229309	0.736777	0.293473	9.0282	1.2126	0.230903	0.774268
ZNF506	0.309657	4.90127	2.35076	0.0255955	0.736777	-0.167967	4.90127	-1.21736	0.231665	0.775912
FADD	0.311884	2.77489	2.29281	0.0252642	0.736777	-0.153651	2.77489	-1.20495	0.232803	0.776218
LINC02027	-2.43832	-0.552917	-2.52519	0.0143281	0.736777	-0.888331	-0.552917	-1.2112	0.232708	0.776218
DHTKD1	-0.235062	5.81837	-2.3366	0.0229072	0.736777	0.0997386	5.81837	1.19126	0.239001	0.779378
NME2	0.367942	2.50892	2.35508	0.0218421	0.736777	0.205315	2.50892	1.17562	0.244242	0.783776
ZFC3H1	0.282203	4.42465	2.46365	0.017649	0.736777	0.113598	4.42465	1.1769	0.248191	0.784679
GTF3C4	0.283893	5.69263	2.41766	0.0213367	0.736777	0.132816	5.69263	1.17129	0.250521	0.785332
TMEM251	0.418312	4.18284	2.46851	0.016681	0.736777	-0.190512	4.18284	-1.16145	0.250354	0.785332
SLC7A4	-1.20968	-0.174165	-2.4546	0.024686	0.736777	-0.95998	-0.174165	-1.14985	0.254944	0.787568
UBLCP1	0.239786	6.2333	2.46435	0.0166559	0.736777	0.103518	6.2333	1.14887	0.25526	0.787568
TMEM183B	-0.525939	2.48025	-2.57615	0.0131382	0.736777	0.261878	2.48025	1.14785	0.255818	0.788082
THNSL1	0.290899	5.0196	2.31191	0.025066	0.736777	0.144451	5.0196	1.14339	0.25819	0.789819
AC012368.1	0.701987	1.83302	2.72396	0.00991277	0.736777	0.260802	1.83302	1.15592	0.258603	0.790121
PGAP2	-0.31791	4.53381	-2.30049	0.0247998	0.736777	0.117987	4.53381	1.11472	0.269406	0.796391
ZNF700	0.405571	3.92089	2.64578	0.0120851	0.736777	0.190518	3.92089	1.11693	0.269805	0.796583
AC020904.2	-0.479284	2.50017	-2.57848	0.0123572	0.736777	0.201929	2.50017	1.09439	0.27802	0.796883
JPX	0.500467	1.79261	2.38255	0.0202729	0.736777	0.167548	1.79261	1.09807	0.27669	0.796883
PKD1P6	1.71252	-0.0530805	2.38335	0.0202331	0.736777	-0.439594	-0.0530805	-1.10137	0.274994	0.796883
PLAT	-2.21368	3.18586	-2.65758	0.0100555	0.736777	-0.293825	3.18586	-1.11802	0.282668	0.796883
POMT1	-0.221946	6.62336	-2.3841	0.0203657	0.736777	0.0962701	6.62336	1.09008	0.280078	0.796883
PRMT2	-0.209257	8.42525	-2.50427	0.0152034	0.736777	-0.0858806	8.42525	-1.08438	0.282848	0.796883
SLC38A9	0.253449	4.81147	2.44549	0.0175899	0.736777	0.112608	4.81147	1.08318	0.283108	0.796883
SLC45A1	-0.425623	3.41129	-2.63123	0.0107201	0.736777	0.197745	3.41129	1.09038	0.279765	0.796883
UQCRFS1P1	-0.375104	3.44827	-2.38267	0.0206453	0.736777	0.200858	3.44827	1.085	0.282129	0.796883
USP31	0.476582	4.14041	2.34956	0.0222728	0.736777	-0.210883	4.14041	-1.0912	0.279744	0.796883
SERBP1P5	-0.671137	0.39273	-2.36547	0.0211492	0.736777	0.283452	0.39273	1.06019	0.293172	0.798861
SYBU	-0.341535	7.32025	-2.58751	0.0125735	0.736777	-0.137548	7.32025	-1.06386	0.292339	0.798861
ZNF232	0.309085	4.39688	2.38178	0.0248923	0.736777	-0.124254	4.39688	-1.07117	0.298317	0.800316
SRRD	0.216004	5.10989	2.39823	0.0194977	0.736777	0.0923689	5.10989	1.04705	0.29914	0.800694
BET1L	-0.713493	5.06434	-2.5239	0.0256193	0.736777	-0.296893	5.06434	-1.07849	0.302715	0.802655
EIF3E	0.215683	6.93124	2.42086	0.0190967	0.736777	0.0904228	6.93124	1.04066	0.3029	0.802655
HSPD1P4	-0.421325	2.2899	-2.34319	0.0223423	0.736777	0.160238	2.2899	1.03113	0.306486	0.804446
LINC01184	-0.277413	4.45958	-2.3629	0.0223853	0.736777	-0.106974	4.45958	-1.03523	0.307289	0.804446
RN7SL5P	-0.714969	2.6171	-2.42513	0.0182292	0.736777	0.248799	2.6171	1.01518	0.313968	0.807507
AC007342.7	0.608048	1.14908	2.41624	0.0207824	0.736777	0.265753	1.14908	1.01879	0.314252	0.807669
PIN1	-0.263724	7.03566	-2.31082	0.0258067	0.736777	-0.112933	7.03566	-1.01334	0.316738	0.809597
NUP153	0.291984	4.48998	2.48529	0.01595	0.736777	-0.0978859	4.48998	-1.00774	0.318865	0.809684
CCDC169	0.569775	2.36968	2.35913	0.0247292	0.736777	0.280046	2.36968	0.989693	0.327397	0.810225
AL441992.1	-1.22174	-0.260418	-2.31071	0.0241989	0.736777	0.292433	-0.260418	0.979184	0.332448	0.811361
RPL15P3	-0.316546	3.99656	-2.33048	0.0230494	0.736777	0.158577	3.99656	0.980495	0.330652	0.811361
ZNF552	0.471511	2.68705	2.45114	0.0176355	0.736777	0.175119	2.68705	0.974163	0.334692	0.811424
CLEC4G	-1.16942	-2.15493	-2.81168	0.0116046	0.736777	-0.518633	-2.15493	-0.975718	0.335334	0.811643
ARPC3P1	-0.507113	1.08603	-2.54256	0.013593	0.736777	-0.194663	1.08603	-0.969576	0.336037	0.812134
WASH3P	0.614489	2.39594	2.37034	0.0221847	0.736777	0.200207	2.39594	0.973102	0.339778	0.812307
HSP90AB2P	-0.712994	0.501188	-2.32345	0.0238274	0.736777	-0.313135	0.501188	-0.949374	0.346198	0.815346
RNPS1P1	-0.472183	2.57668	-2.37273	0.0207727	0.736777	-0.186677	2.57668	-0.943709	0.348982	0.817353
SRGAP1	0.525741	5.94399	2.43882	0.0181847	0.736777	-0.187445	5.94399	-0.927808	0.357983	0.820241
RBBP4P2	-0.476771	0.915559	-2.29937	0.0248651	0.736777	-0.183226	0.915559	-0.9178	0.36228	0.82242
FAM3C2	-0.382358	3.26561	-2.34192	0.0230028	0.736777	0.138432	3.26561	0.915463	0.364327	0.823251
ADSSL1	-0.57418	2.85488	-2.36683	0.021482	0.736777	0.291583	2.85488	0.912812	0.364881	0.8234
EIF3CL	-0.694936	3.33449	-2.5501	0.0141123	0.736777	-0.249474	3.33449	-0.907894	0.368316	0.82397
ZNF146	0.293938	6.55196	2.45824	0.0193385	0.736777	0.100895	6.55196	0.912799	0.369373	0.824581
ZNF766	0.295289	5.34333	2.53774	0.0145237	0.736777	0.10004	5.34333	0.906796	0.369367	0.824581
AC046176.1	-0.440369	2.22732	-2.49465	0.0152867	0.736777	0.163107	2.22732	0.894893	0.374305	0.824821
PROX1-AS1	-1.11436	-0.102327	-2.40622	0.0195012	0.736777	0.354492	-0.102327	0.904186	0.370585	0.824821
PTP4A1P7	-0.876299	0.346406	-2.47861	0.0166541	0.736777	-0.309405	0.346406	-0.901545	0.371647	0.824821
TTR	-3.01559	-1.21588	-2.52613	0.0141208	0.736777	0.626386	-1.21588	0.892255	0.378636	0.826988
FTSJ3	-0.347859	5.23128	-2.66179	0.0100564	0.736777	-0.0870831	5.23128	-0.886749	0.380533	0.827846
AL353660.1	-1.7583	-0.912649	-2.39724	0.0195461	0.736777	0.343888	-0.912649	0.879766	0.385353	0.832291
AL513318.2	0.479713	3.83561	2.35199	0.0258412	0.736777	-0.181557	3.83561	-0.878354	0.386695	0.832992
LRIF1	0.286955	4.86106	2.46293	0.0194082	0.736777	0.112609	4.86106	0.868529	0.389965	0.834045
GAPDHP60	-0.853022	0.202698	-2.56542	0.0127378	0.736777	0.30348	0.202698	0.863724	0.391069	0.835324
TDP2	0.206598	5.42765	2.3329	0.0234874	0.736777	0.0744814	5.42765	0.859505	0.393846	0.837202
ATP5F1CP1	-0.593171	0.947652	-2.29152	0.0257264	0.736777	0.256921	0.947652	0.850773	0.398174	0.839154
PHLDB2	-2.09306	1.49139	-2.45822	0.0167912	0.736777	-0.283204	1.49139	-0.868545	0.398174	0.839154
SPARC	-1.31969	9.39199	-2.55877	0.014722	0.736777	-0.376909	9.39199	-0.857301	0.399713	0.839614
PLCB3	0.769063	1.67237	2.47821	0.0159408	0.736777	-0.129184	1.67237	-0.826845	0.411496	0.844929
HSPE1P3	-0.852126	0.350443	-2.54221	0.013866	0.736777	0.249246	0.350443	0.824414	0.413512	0.845083
DYM	0.17247	6.48676	2.57841	0.0132757	0.736777	0.0539138	6.48676	0.814821	0.419372	0.847262
MSN	-1.11765	7.96032	-2.55139	0.0143664	0.736777	-0.303739	7.96032	-0.81583	0.421049	0.8477
HAP1	-0.916517	4.52645	-2.31507	0.0239545	0.736777	-0.172102	4.52645	-0.809632	0.425661	0.849803
CUL7	-0.498371	5.14034	-2.57814	0.0125513	0.736777	0.125601	5.14034	0.798875	0.428464	0.851045
PURB	0.728509	2.68023	2.31469	0.0239559	0.736777	0.157008	2.68023	0.79872	0.427502	0.851045
KLHDC8B	-0.355272	5.47051	-2.59601	0.0139072	0.736777	0.109969	5.47051	0.789727	0.434845	0.854064
YWHAEP1	-0.557411	0.293865	-2.59338	0.0118417	0.736777	-0.199766	0.293865	-0.782327	0.437	0.855318
LINC01011	0.655894	1.98301	2.54959	0.0163643	0.736777	0.224758	1.98301	0.784459	0.437453	0.855395
SUMO2P1	-0.581337	1.79509	-2.46679	0.0172236	0.736777	0.18732	1.79509	0.782656	0.437367	0.855395
RPS3A	0.251099	7.55318	2.38458	0.0214236	0.736777	0.0795186	7.55318	0.777732	0.440902	0.855573
SLC44A3-AS1	0.835273	2.31149	2.44908	0.0173512	0.736777	0.189769	2.31149	0.775019	0.443206	0.855573
LINC02175	-0.767714	0.673267	-2.37136	0.0210731	0.736777	-0.262159	0.673267	-0.757487	0.451659	0.858838
MT-ATP8	0.539797	5.45967	2.56468	0.0128665	0.736777	0.119115	5.45967	0.75682	0.453054	0.859049
TBPL1	0.285842	5.98614	2.42012	0.0213928	0.736777	0.103447	5.98614	0.757817	0.452415	0.859049
INTS7	0.31653	5.72509	2.40859	0.0199349	0.736777	-0.0992618	5.72509	-0.751823	0.455657	0.860194
RBM8B	-0.523254	1.80155	-2.39585	0.0196137	0.736777	0.158691	1.80155	0.750856	0.45558	0.860194
AC112777.1	-1.21127	-1.38972	-2.43634	0.0177582	0.736777	-0.180715	-1.38972	-0.748204	0.458828	0.861556
AIP	-0.251876	5.38471	-2.40049	0.0193881	0.736777	0.0797252	5.38471	0.742264	0.460731	0.862266
RPS6KA3	0.625363	4.80948	2.38337	0.0203661	0.736777	-0.223211	4.80948	-0.741634	0.461112	0.862266
WHAMM	1.40751	1.21971	2.53707	0.0137853	0.736777	-0.220242	1.21971	-0.742241	0.460881	0.862266
PEPD	-0.366845	7.18621	-2.54784	0.0141801	0.736777	-0.0982157	7.18621	-0.742809	0.461773	0.862467
CDC5L	0.180207	6.29849	2.46794	0.0173832	0.736777	0.0497973	6.29849	0.738758	0.464278	0.863732
FAR2P4	-2.32304	-1.38669	-2.40966	0.0189581	0.736777	-0.398509	-1.38669	-0.737043	0.466491	0.864163
PRMT6	-0.263001	5.94011	-2.35304	0.0250883	0.736777	-0.0896659	5.94011	-0.735811	0.466132	0.864163
BCLAF1	0.204063	7.25722	2.31066	0.0243232	0.736777	0.0592086	7.25722	0.732361	0.466839	0.86451
MTPAP	0.353485	5.79418	2.37992	0.0244763	0.736777	0.112296	5.79418	0.732325	0.469479	0.86501
PATL1	0.567465	3.59439	2.50856	0.0147719	0.736777	0.112102	3.59439	0.727858	0.470251	0.865112
SMG7	0.292539	6.71649	2.42165	0.0202894	0.736777	0.0834587	6.71649	0.719619	0.476418	0.867113
ZNF391	0.362897	3.14457	2.4882	0.0161092	0.736777	0.16255	3.14457	0.707628	0.481865	0.869526
PRDM16	-1.94806	-1.17128	-2.55845	0.0129761	0.736777	-0.308362	-1.17128	-0.707136	0.484202	0.869659
AC022968.1	-0.413829	2.70207	-2.60889	0.0113698	0.736777	0.117924	2.70207	0.687884	0.494091	0.873075
MTND1P23	-2.05036	0.730872	-2.31094	0.0252327	0.736777	0.595861	0.730872	0.688853	0.494297	0.873233
AC010342.1	-0.606833	0.645889	-2.46664	0.0164762	0.736777	0.14326	0.645889	0.683631	0.496882	0.874423
AL158152.1	0.746094	0.485039	2.59043	0.0119337	0.736777	0.12733	0.485039	0.676739	0.501089	0.876607
CYP51A1P1	-0.453525	1.31664	-2.50236	0.0161167	0.736777	-0.183543	1.31664	-0.674209	0.502685	0.877084
CALCRL	-1.16712	3.65525	-2.50613	0.0178375	0.736777	0.28833	3.65525	0.668629	0.510001	0.877987
FCRLB	0.643714	0.280639	2.48172	0.0176315	0.736777	0.256876	0.280639	0.667039	0.507225	0.877987
DHPS	0.732282	0.41498	2.33662	0.0227416	0.736777	0.13437	0.41498	0.661117	0.51114	0.878687
ARHGAP21	0.257743	6.10394	2.68898	0.0104396	0.736777	0.0512756	6.10394	0.654901	0.519031	0.880932
POTEE	-0.394037	4.42335	-2.31433	0.024323	0.736777	-0.0995279	4.42335	-0.644041	0.522292	0.882077
AL049828.2	1.30705	0.665757	2.32363	0.0234738	0.736777	0.207066	0.665757	0.635373	0.527813	0.884761
NALCN	-0.389965	4.61557	-2.32626	0.0241707	0.736777	0.116491	4.61557	0.632105	0.529823	0.886575
TMSB4XP2	-0.77411	1.23441	-2.38449	0.0204283	0.736777	0.235817	1.23441	0.631373	0.530118	0.886575
NHP2P1	-0.662023	1.04669	-2.51341	0.0145694	0.736777	0.177146	1.04669	0.625179	0.534148	0.887288
RILPL2	-1.21697	1.55416	-2.53012	0.0139886	0.736777	0.120925	1.55416	0.630646	0.534328	0.887288
THBS3	0.640567	3.96451	2.49648	0.0152725	0.736777	-0.0886349	3.96451	-0.625954	0.533834	0.887288
SLC35F2	-1.07473	1.98355	-2.61635	0.0112772	0.736777	-0.205482	1.98355	-0.620683	0.537625	0.887952
VDAC2	0.20559	8.35698	2.34981	0.0221216	0.736777	-0.0534456	8.35698	-0.61821	0.53874	0.888334
AP3S1	0.313627	6.6643	2.46329	0.0168481	0.736777	-0.0797776	6.6643	-0.608843	0.544934	0.889441
MAN2B1	-0.496685	3.922	-2.41012	0.0189346	0.736777	-0.066871	3.922	-0.612212	0.543825	0.889441
STAP2	-0.756945	1.46768	-2.32016	0.023683	0.736777	0.105531	1.46768	0.61209	0.543298	0.889441
DDX20	0.202535	5.83462	2.48538	0.0159591	0.736777	-0.0492001	5.83462	-0.602952	0.548877	0.891122
PDE1C	-1.07996	3.9469	-2.36853	0.0220138	0.736777	-0.182594	3.9469	-0.613134	0.549451	0.891355
NEPRO	0.170024	5.69013	2.48592	0.0157958	0.736777	0.0406721	5.69013	0.591183	0.556586	0.894975
ALPK1	-1.32055	1.16948	-2.4849	0.0156715	0.736777	0.169877	1.16948	0.588328	0.558449	0.895515
RPL24P8	-0.531616	1.92321	-2.4511	0.0173595	0.736777	0.137284	1.92321	0.584759	0.560857	0.895634
ABHD17AP1	-0.732177	0.685755	-2.44208	0.0174682	0.736777	-0.148344	0.685755	-0.583358	0.561768	0.896046
AC022210.1	-0.662924	1.76031	-2.3076	0.0252277	0.736777	0.182616	1.76031	0.567083	0.572833	0.897587
AC108472.1	1.35108	-0.875851	2.3241	0.0234125	0.736777	0.204532	-0.875851	0.569728	0.571722	0.897587
AC145207.5	0.632262	1.65044	2.59039	0.0121347	0.736777	-0.120959	1.65044	-0.576011	0.567125	0.897587
ACSF2	-1.82573	0.622581	-2.58814	0.0120937	0.736777	0.146394	0.622581	0.573175	0.57047	0.897587
AP003108.2	0.770342	0.33945	2.38056	0.0208372	0.736777	-0.180663	0.33945	-0.56656	0.573279	0.897587
LINC01547	0.538371	2.74719	2.29606	0.0253451	0.736777	0.113254	2.74719	0.564634	0.574782	0.897587
PKNOX2	0.865644	2.54142	2.38272	0.0219821	0.736777	0.151265	2.54142	0.572426	0.575139	0.897587
POLR2G	-0.258601	7.77329	-2.32817	0.0234037	0.736777	-0.0596492	7.77329	-0.563585	0.575185	0.897587
TUBBP1	-0.629517	4.52885	-2.53842	0.0144129	0.736777	-0.162918	4.52885	-0.569278	0.571336	0.897587
UTS2B	-0.999974	2.65078	-2.7243	0.0188851	0.736777	0.347368	2.65078	0.562485	0.576278	0.897587
YAF2	-0.281449	4.62467	-2.41543	0.0186776	0.736777	0.0872195	4.62467	0.562186	0.576016	0.897587
ABCC6P1	-1.51761	-0.709612	-2.43501	0.0179347	0.736777	0.136416	-0.709612	0.556327	0.580608	0.897845
RAB4A	0.156542	7.01368	2.43639	0.0177206	0.736777	-0.0359643	7.01368	-0.554973	0.58091	0.897865
DDX52	0.192839	5.62022	2.43969	0.0176655	0.736777	0.0401927	5.62022	0.552486	0.582664	0.898944
ANXA2R	2.4869	-0.559007	2.41935	0.0184984	0.736777	0.309293	-0.559007	0.546247	0.587698	0.900659
AC022415.1	0.378827	1.79461	2.41447	0.0192842	0.736777	0.0969388	1.79461	0.535489	0.594266	0.901769
ZER1	-0.283532	6.5797	-2.42895	0.0182824	0.736777	0.0590304	6.5797	0.535111	0.594627	0.902071
NAA15	0.200315	6.37761	2.2885	0.0255521	0.736777	-0.0432878	6.37761	-0.529854	0.598108	0.903582
CBS	1.15855	2.98479	2.44109	0.0178392	0.736777	-0.180316	2.98479	-0.529957	0.600054	0.90414
NUPL2	0.253431	4.04703	2.42709	0.0192221	0.736777	0.0519742	4.04703	0.525783	0.601723	0.904686
TIMP1	-0.668975	6.08288	-2.39918	0.0197765	0.736777	-0.0960319	6.08288	-0.521685	0.606487	0.905834
SLC19A1	-0.329789	4.76113	-2.39215	0.0201296	0.736777	-0.058184	4.76113	-0.516411	0.608111	0.907157
ACTG1P9	-0.887668	0.647857	-2.60897	0.0113674	0.736777	-0.18239	0.647857	-0.506308	0.614436	0.909105
WASH2P	0.674971	1.10996	2.41086	0.0189581	0.736777	0.115404	1.10996	0.505992	0.614851	0.909159
SRBD1	-0.493077	5.25863	-2.44369	0.0188167	0.736777	-0.0944564	5.25863	-0.499183	0.620531	0.910762
ST13P6	-0.510445	1.7861	-2.45711	0.0168176	0.736777	0.0966981	1.7861	0.489381	0.626299	0.913256
NBPF3	-0.484382	3.46562	-2.31362	0.0249172	0.736777	0.090279	3.46562	0.48915	0.627348	0.913542
HDAC6	-0.263765	7.15063	-2.48396	0.0162913	0.736777	-0.048228	7.15063	-0.483654	0.630771	0.914418
MRAP2	-0.754779	3.48277	-2.45389	0.0229473	0.736777	-0.137955	3.48277	-0.486594	0.633195	0.914883
MAP1LC3B	0.268608	9.32604	2.34724	0.0222783	0.736777	-0.0544492	9.32604	-0.478531	0.633985	0.915427
LZIC	0.192221	5.6562	2.37436	0.021341	0.736777	-0.0354459	5.6562	-0.47446	0.637312	0.916002
ACOX3	-0.308765	5.06776	-2.69207	0.00978789	0.736777	-0.049185	5.06776	-0.471548	0.639729	0.916298
LINC00595	-1.78138	-0.352631	-2.47034	0.0162758	0.736777	0.174971	-0.352631	0.465869	0.643902	0.918375
GEMIN7	0.60879	0.459989	2.48326	0.0157371	0.736777	-0.111346	0.459989	-0.463104	0.644912	0.918591
DDB1	-0.234189	8.95423	-2.28414	0.0258997	0.736777	0.0449037	8.95423	0.460722	0.646634	0.918878
RBM22	0.165137	6.2118	2.43749	0.017818	0.736777	0.0292091	6.2118	0.455777	0.650206	0.919584
NME2P1	-0.625785	1.25749	-2.63582	0.010591	0.736777	0.124108	1.25749	0.442378	0.659755	0.92207
TADA2A	0.375777	4.01465	2.41434	0.01881	0.736777	0.0465718	4.01465	0.43276	0.667457	0.924001
AC027309.2	-0.492703	2.51814	-2.56818	0.0129103	0.736777	0.0793942	2.51814	0.414031	0.680351	0.927771
GNAI3	0.20369	8.36361	2.44747	0.0179118	0.736777	-0.0329275	8.36361	-0.412987	0.681398	0.927771
IRF3	-0.354207	3.76631	-2.33265	0.0231917	0.736777	0.0433328	3.76631	0.417313	0.679353	0.927771
VAT1L	-0.609672	9.75809	-2.32314	0.0246393	0.736777	-0.104252	9.75809	-0.41953	0.676897	0.927771
RPL15P18	-0.531186	1.41065	-2.34875	0.0220389	0.736777	-0.103491	1.41065	-0.409007	0.683944	0.927808
CXorf56	0.265393	4.01106	2.29112	0.0253677	0.736777	-0.038435	4.01106	-0.404316	0.687372	0.929033
LRRC29	-0.527483	1.99828	-2.39916	0.0210347	0.736777	0.0743293	1.99828	0.405586	0.688342	0.929126
TPI1P1	-0.665651	4.11885	-2.59596	0.0117923	0.736777	-0.0914446	4.11885	-0.400865	0.689914	0.929126
PRMT1	-0.312087	7.48828	-2.47088	0.0163104	0.736777	-0.0492929	7.48828	-0.391892	0.696487	0.931638
AAMP	-0.234036	6.64569	-2.35038	0.0230441	0.736777	-0.0358238	6.64569	-0.391023	0.697783	0.932042
POLM	0.37212	2.88873	2.3587	0.0239102	0.736777	0.0514651	2.88873	0.393592	0.697868	0.932042
MBNL1-AS1	-1.26851	0.235433	-2.33348	0.0228807	0.736777	-0.136517	0.235433	-0.389453	0.698606	0.932295
KRT8	-1.14067	0.852957	-2.68885	0.0136337	0.736777	0.28679	0.852957	0.379697	0.705495	0.934779
PPIAP11	-0.480429	3.24463	-2.50446	0.0151661	0.736777	-0.0832393	3.24463	-0.371686	0.711394	0.936568
PEX5L	0.355151	3.02954	2.46923	0.0183793	0.736777	0.133948	3.02954	0.365544	0.71601	0.938318
CHID1	-0.218133	7.2511	-2.4057	0.0191974	0.736777	-0.0299538	7.2511	-0.356374	0.722788	0.939793
SUPV3L1	0.152368	5.94129	2.43894	0.0176069	0.736777	0.0223501	5.94129	0.355799	0.723199	0.939793
HIST1H3H	-1.32159	-0.856573	-2.34098	0.0224846	0.736777	0.120822	-0.856573	0.351979	0.726205	0.940064
SPCS2P4	-0.319307	3.3258	-2.28818	0.0255489	0.736777	0.0477076	3.3258	0.352926	0.725341	0.940064
NPIPB15	-1.67125	-1.17031	-2.56519	0.012769	0.736777	0.132009	-1.17031	0.348692	0.728663	0.940648
PPIAP29	-0.50619	3.0987	-2.57328	0.013033	0.736777	-0.0801789	3.0987	-0.348381	0.728762	0.940648
INSYN2B	-1.15217	2.68037	-2.50953	0.0147173	0.736777	0.0909554	2.68037	0.345287	0.731534	0.941192
AC019257.1	1.49248	-0.825182	2.29606	0.0251087	0.736777	-0.133106	-0.825182	-0.333605	0.739865	0.943645
SCGN	-1.4787	0.141964	-2.45505	0.0210021	0.736777	0.264402	0.141964	0.325724	0.745908	0.944805
MEG3	-2.55917	0.707423	-2.51091	0.0260245	0.736777	0.457966	0.707423	0.325719	0.746479	0.945154
TGS1	0.256666	4.3057	2.36695	0.0211754	0.736777	0.0316701	4.3057	0.317498	0.751968	0.946587
AC126177.6	-0.592403	-0.634062	-2.41	0.0209478	0.736777	-0.184728	-0.634062	-0.315963	0.753131	0.947192
PPP1R13L	-1.83384	-0.281015	-2.55785	0.0130076	0.736777	0.106846	-0.281015	0.315013	0.75675	0.948351
AC009245.1	-0.570613	1.42544	-2.57378	0.0124638	0.736777	0.0712564	1.42544	0.303035	0.762878	0.951108
EIPR1	-0.220606	5.73764	-2.31525	0.0240459	0.736777	-0.0277506	5.73764	-0.303325	0.762676	0.951108
GPRASP1	-0.636852	4.2318	-2.66218	0.0108111	0.736777	0.0771425	4.2318	0.301302	0.764399	0.951108
NUP54	0.235045	5.71281	2.50834	0.0149581	0.736777	0.024538	5.71281	0.298209	0.766687	0.95125
AC068631.3	-0.486793	1.30918	-2.37816	0.020803	0.736777	-0.0604099	1.30918	-0.281777	0.77907	0.951897
GLRB	-0.454443	5.22295	-2.41046	0.0193291	0.736777	-0.0496148	5.22295	-0.292551	0.771055	0.951897
TPI1P2	-0.671354	0.902254	-2.46579	0.016567	0.736777	0.0654066	0.902254	0.285428	0.776386	0.951897
TTC39B	-0.579875	2.72953	-2.36967	0.0210013	0.736777	-0.0476851	2.72953	-0.286672	0.775787	0.951897
C8orf33	-0.209584	6.30029	-2.51209	0.0148184	0.736777	-0.0206595	6.30029	-0.278371	0.781774	0.95245
TAGLN3	-0.320151	8.42955	-2.36149	0.0227986	0.736777	0.0374587	8.42955	0.275986	0.783823	0.95245
CT75	0.891655	1.04483	2.55283	0.0148982	0.736777	-0.0942191	1.04483	-0.26691	0.790917	0.954671
WDPCP	-0.407123	3.69523	-2.352	0.0218634	0.736777	0.0326233	3.69523	0.26394	0.792701	0.954778
AC024257.3	0.912628	-0.386961	2.4692	0.0163101	0.736777	-0.137172	-0.386961	-0.260586	0.795275	0.955075
GPATCH11	0.255632	4.77137	2.53057	0.0144971	0.736777	-0.0240631	4.77137	-0.257869	0.797611	0.955937
AL391422.4	-1.3911	-1.60178	-2.30417	0.0246412	0.736777	0.080258	-1.60178	0.254541	0.80011	0.956534
PCAT7	-1.15661	2.83514	-2.33186	0.0229748	0.736777	0.0829458	2.83514	0.253462	0.800838	0.956534
SHISA4	-0.41677	4.62231	-2.33186	0.0229896	0.736777	-0.0315424	4.62231	-0.254089	0.800466	0.956534
USP5	-0.26195	7.56673	-2.57435	0.012687	0.736777	-0.0250818	7.56673	-0.254543	0.799982	0.956534
XYLB	-0.546064	2.03496	-2.28926	0.0254832	0.736777	0.0478521	2.03496	0.25322	0.800951	0.956534
AC067904.2	-0.545972	1.05474	-2.39842	0.0194938	0.736777	0.0451293	1.05474	0.248423	0.804649	0.957386
MKRN4P	-1.39422	0.126802	-2.3549	0.0218408	0.736777	-0.0886035	0.126802	-0.247914	0.806204	0.957526
ASNSD1	0.225761	5.51635	2.42961	0.0180249	0.736777	-0.0222529	5.51635	-0.240456	0.81077	0.958792
RPL35P5	-0.507897	1.68193	-2.30232	0.0246876	0.736777	0.0565048	1.68193	0.235949	0.81425	0.959216
TMSB4XP8	-0.671131	5.68854	-2.51569	0.0144845	0.736777	0.067272	5.68854	0.232495	0.816919	0.960025
UBE2D3P1	-0.490021	1.84364	-2.65825	0.00997957	0.736777	-0.0498487	1.84364	-0.231361	0.817797	0.960025
DUSP22	-0.316041	5.234	-2.50112	0.0154891	0.736777	0.0282388	5.234	0.222612	0.824646	0.96127
PPID	0.441552	5.31658	2.79668	0.0101589	0.736777	0.0346341	5.31658	0.220678	0.827271	0.961754
IDH1-AS1	0.940959	-0.154843	2.37814	0.0205132	0.736777	-0.0550343	-0.154843	-0.213279	0.831842	0.96265
MACO1	0.336829	4.82891	2.39721	0.0242445	0.736777	-0.0330913	4.82891	-0.212645	0.83284	0.96265
NECAB1	-0.722538	4.85007	-2.41856	0.0194504	0.736777	-0.0550873	4.85007	-0.21591	0.830273	0.96265
NUCB1	-0.401652	6.41751	-2.48788	0.0162667	0.736777	-0.0282677	6.41751	-0.215269	0.83086	0.96265
RAMACL	-0.395534	1.71136	-2.33752	0.0226552	0.736777	-0.043813	1.71136	-0.208895	0.835215	0.963392
KCTD5	-0.204829	5.95037	-2.33222	0.0233181	0.736777	-0.0155975	5.95037	-0.207913	0.836173	0.963501
HCFC1R1	-0.386184	5.0055	-2.35571	0.0223163	0.736777	-0.0305399	5.0055	-0.201725	0.840977	0.965516
DMTF1	0.241333	6.21514	2.34764	0.0223556	0.736777	-0.0180501	6.21514	-0.200418	0.841917	0.965922
KATNB1	-0.25051	5.9949	-2.66821	0.00971861	0.736777	-0.0183579	5.9949	-0.197492	0.844089	0.966423
DYNC1I2P1	-0.600173	1.83991	-2.49873	0.0155723	0.736777	0.0468692	1.83991	0.194899	0.846173	0.966697
AC008429.2	-0.544943	1.2255	-2.6118	0.0112833	0.736777	-0.0456479	1.2255	-0.184915	0.853899	0.967203
ALS2CL	-1.93202	-0.0319771	-2.88356	0.0106843	0.736777	-0.18533	-0.0319771	-0.192637	0.848087	0.967203
HLA-DRB1	-2.93857	1.91635	-2.48392	0.0202085	0.736777	0.19193	1.91635	0.194763	0.848606	0.967203
RASAL2-AS1	0.860313	0.338767	2.42668	0.0184829	0.736777	-0.0744629	0.338767	-0.179864	0.857848	0.968084
BTF3L4	0.290399	7.92263	2.62582	0.0120039	0.736777	0.019137	7.92263	0.172109	0.864132	0.970372
SNHG10	0.370254	2.79429	2.41998	0.018967	0.736777	0.0237924	2.79429	0.172295	0.86392	0.970372
OTULINL	-0.749393	3.97171	-2.4519	0.0246603	0.736777	-0.056237	3.97171	-0.169939	0.866484	0.97083
TIFA	0.548906	3.16295	2.76005	0.0100099	0.736777	-0.0344693	3.16295	-0.168085	0.867572	0.970929
MAP2K4P1	-0.607761	0.658352	-2.57115	0.0125495	0.736777	0.0347063	0.658352	0.165934	0.868749	0.971397
CORO1B	-0.295001	5.34248	-2.38492	0.0204882	0.736777	0.0172941	5.34248	0.156402	0.876319	0.972811
HMBS	-0.387221	5.32829	-2.48371	0.0165321	0.736777	-0.0204709	5.32829	-0.155337	0.877435	0.973249
KCTD11	-0.360761	3.86448	-2.32782	0.0235417	0.736777	-0.0190385	3.86448	-0.153689	0.878572	0.973908
AL359918.1	-0.512072	2.05034	-2.45165	0.0170512	0.736777	-0.0291996	2.05034	-0.146434	0.884054	0.974808
ATP6AP1	-0.251918	8.6838	-2.54345	0.0136997	0.736777	0.0137455	8.6838	0.145021	0.885198	0.9749
ZNF282	0.511363	2.3272	2.38752	0.0200342	0.736777	-0.0241403	2.3272	-0.14294	0.886825	0.975562
MECR	-0.291023	5.25782	-2.51871	0.0157736	0.736777	0.0154732	5.25782	0.141693	0.888081	0.975883
TUBAP2	-0.646629	4.79977	-2.50622	0.0155515	0.736777	-0.0350419	4.79977	-0.13656	0.891911	0.977004
GAPDHP65	-0.610999	4.05248	-2.35273	0.0218242	0.736777	0.0369522	4.05248	0.132605	0.894935	0.978098
SIDT2	-0.495123	3.56549	-2.34196	0.0232422	0.736777	0.0204714	3.56549	0.12708	0.899799	0.979193
WDR27	0.583466	4.09331	2.52599	0.014581	0.736777	-0.0227459	4.09331	-0.124725	0.901444	0.979941
PDIA3P1	-0.407874	3.8091	-2.35675	0.0218236	0.736777	0.0188214	3.8091	0.12053	0.904492	0.9804
ACTBP2	-0.60062	5.1058	-2.36468	0.0211901	0.736777	-0.0303767	5.1058	-0.113514	0.909989	0.981779
ZSCAN12P1	-0.7498	0.674889	-2.37338	0.020938	0.736777	0.0314246	0.674889	0.113501	0.910047	0.981779
AC112247.1	-0.572206	1.32146	-2.50602	0.0157075	0.736777	0.027898	1.32146	0.108857	0.913696	0.981981
TMBIM4	0.511853	3.67903	2.40196	0.0205023	0.736777	-0.0195178	3.67903	-0.107573	0.915002	0.981981
ALG13	-0.348785	5.00288	-2.5925	0.0118728	0.736777	-0.0115466	5.00288	-0.101876	0.919185	0.983056
CRYL1	-0.518234	5.21805	-2.54835	0.013344	0.736777	0.0148758	5.21805	0.097893	0.92238	0.98358
TMCO1	0.248396	7.29654	2.307	0.0247175	0.736777	-0.00940408	7.29654	-0.0910113	0.927799	0.98468
AFDN-DT	0.601642	2.97402	2.3574	0.0242927	0.736777	-0.0222499	2.97402	-0.0902912	0.928617	0.984857
RRP7A	0.354254	5.2763	2.43435	0.0211383	0.736777	-0.0113024	5.2763	-0.08427	0.933553	0.984857
ST13P3	-0.773361	0.27606	-2.47856	0.0159267	0.736777	-0.0225277	0.27606	-0.079117	0.937194	0.984857
TRMT61A	-0.311079	3.75167	-2.49692	0.015198	0.736777	0.00666705	3.75167	0.0748773	0.940553	0.985687
FAM92A1P1	-0.561487	0.660015	-2.28318	0.0258595	0.736777	0.0186768	0.660015	0.0690986	0.945133	0.986835
MED29	-0.217245	7.01775	-2.45055	0.0196658	0.736777	0.00564977	7.01775	0.0680966	0.946186	0.986999
CBR1	0.49881	5.33392	2.63296	0.0106854	0.736777	-0.00871556	5.33392	-0.0597014	0.952602	0.98898
VPS26A	0.332534	6.99123	2.5312	0.0143339	0.736777	0.00773384	6.99123	0.0589179	0.953227	0.98898
GPAA1	-0.284695	7.2983	-2.4516	0.0173879	0.736777	0.00557441	7.2983	0.0504022	0.959982	0.990898
NPFFR2	-2.18589	0.409619	-2.56446	0.0192295	0.736777	-0.0578232	0.409619	-0.0502884	0.96012	0.9909
LAMTOR4	-0.339749	6.48064	-2.39668	0.0199521	0.736777	0.00649411	6.48064	0.0488482	0.96122	0.991307
GAPDHP1	-0.630581	5.70674	-2.59752	0.0117142	0.736777	0.0113864	5.70674	0.0462892	0.963229	0.992081
MAMDC2	-1.8549	2.98857	-2.57695	0.0125948	0.736777	-0.00599665	2.98857	-0.0363815	0.97121	0.993714
AC079228.1	-0.563406	1.12792	-2.55635	0.0132609	0.736777	0.0073115	1.12792	0.0302549	0.975961	0.994291
AP001062.1	-1.03855	-0.547183	-2.33941	0.0225912	0.736777	0.00907014	-0.547183	0.0318718	0.974732	0.994291
RABGGTA	-0.272557	5.16443	-2.36217	0.0214927	0.736777	0.00367683	5.16443	0.0305374	0.975737	0.994291
EFHC2	-1.78221	0.645055	-2.38619	0.0202559	0.736777	0.00600083	0.645055	0.0261275	0.979343	0.9951
NOL8	0.230178	4.92851	2.66215	0.00987652	0.736777	0.00171606	4.92851	0.026328	0.979083	0.9951
INTS12	0.221494	5.01513	2.60824	0.0123727	0.736777	-0.00170339	5.01513	-0.0207784	0.983518	0.995498
MSRB2	-0.275689	5.70557	-2.40642	0.0198187	0.736777	-0.00244246	5.70557	-0.0209314	0.983377	0.995498
AC016065.1	0.402121	3.66993	2.49098	0.0182368	0.736777	-0.00337332	3.66993	-0.0197335	0.984359	0.995698
RAD1	0.228161	5.65736	2.62242	0.0123579	0.736777	-0.00158447	5.65736	-0.0193189	0.984695	0.995724
SYS1-DBNDD2	0.894248	-0.193511	2.30427	0.0245711	0.736777	0.00234628	-0.193511	0.00679431	0.994601	0.998617
DNAJB6	0.206619	7.61841	2.6248	0.0110084	0.736777	-0.000507379	7.61841	-0.00653848	0.994804	0.998698
ACOT4	0.907968	0.00639947	2.36811	0.0226043	0.736777	0.000383889	0.00639947	0.000868792	0.99931	0.999681
ARHGAP22	-0.597252	3.54466	-2.38143	0.0263827	0.736777	-1.09484	3.54466	-2.65006	0.0103113	0.74447
OSBPL1A	0.486647	5.30506	2.28399	0.026192	0.736777	0.278918	5.30506	1.56605	0.124094	0.744994
AL162595.1	0.370282	2.76256	2.28837	0.0261703	0.736777	0.2535	2.76256	1.50963	0.136646	0.749732
DNPH1	-0.433734	4.87458	-2.30582	0.0265312	0.736777	0.212835	4.87458	1.25941	0.217428	0.768545
DPP7	0.458486	5.58981	2.37942	0.0262464	0.736777	-0.197701	5.58981	-1.13582	0.272911	0.796883
GPR75	1.00147	-1.18785	2.27252	0.0265333	0.736777	0.770251	-1.18785	1.08742	0.28106	0.796883
CSNK1D	-0.208111	7.32968	-2.27715	0.0264625	0.736777	0.0720164	7.32968	0.852822	0.397293	0.839054
NCDN	-0.336454	6.41673	-2.27433	0.0265304	0.736777	0.0977441	6.41673	0.662802	0.509928	0.877987
DMAC1	-0.294457	6.07406	-2.30188	0.026482	0.736777	0.0366566	6.07406	0.28638	0.775967	0.951897
TAFA4	-1.8999	0.47378	-2.28003	0.0262442	0.736777	0.0231246	0.47378	0.0449733	0.96448	0.992388
CHMP1A	-0.236722	7.19576	-2.28426	0.026433	0.736777	0.00219008	7.19576	0.0219354	0.982583	0.995498
AC016734.1	-0.521487	2.29872	-2.26904	0.0267567	0.740098	-0.266289	2.29872	-1.19176	0.237898	0.77828
ACP2	-0.305633	6.47813	-2.32369	0.0267903	0.740098	-0.130989	6.47813	-1.07508	0.292402	0.798861
RBP1	-0.640052	8.50399	-2.30235	0.0267638	0.740098	-0.0014932	8.50399	-0.00533194	0.995772	0.999048
TAP2	-0.841723	0.652974	-2.27054	0.0268473	0.740408	0.598368	0.652974	1.40827	0.16406	0.753298
MED22	-0.258635	5.22907	-2.29343	0.0269163	0.741046	-0.0571164	5.22907	-0.574775	0.569478	0.897587
AL596087.1	-0.408139	2.47805	-2.26588	0.0269684	0.741126	0.357528	2.47805	2.48753	0.0156518	0.74447
AC010343.1	-0.546606	1.62833	-2.27026	0.0270109	0.741126	0.0256603	1.62833	0.102952	0.918342	0.982652
WNK3	0.334509	5.67253	2.29867	0.0271792	0.743221	0.304174	5.67253	1.94487	0.0579873	0.74447
SPATS2	0.262718	5.13833	2.30425	0.027163	0.743221	-0.00292833	5.13833	-0.0245066	0.980566	0.995411
LINC01278	0.233964	5.72691	2.26519	0.0272551	0.74358	0.231027	5.72691	2.28495	0.0259023	0.74447
AC026748.3	-0.516582	2.58264	-2.27322	0.0272844	0.74358	-0.0140824	2.58264	-0.0571313	0.954638	0.989114
MGAT4C	0.657411	4.79769	2.33145	0.0274276	0.746225	0.198023	4.79769	0.460824	0.64659	0.918878
AL139095.2	-0.586894	0.805808	-2.25703	0.0278731	0.746993	1.10775	0.805808	3.8085	0.000324459	0.74447
KMT2C	0.326429	6.60034	2.27942	0.0280479	0.746993	0.304737	6.60034	2.40852	0.0223441	0.74447
RPS15A	0.235589	6.24879	2.25266	0.0280808	0.746993	0.171377	6.24879	1.67197	0.0997771	0.74447
TOP1	0.302175	5.16615	2.25754	0.0277709	0.746993	0.262764	5.16615	2.37574	0.0214394	0.74447
NOD1	-1.43802	1.33915	-2.25361	0.028097	0.746993	-0.207083	1.33915	-0.941666	0.350513	0.817859
Z97832.2	1.2022	0.100106	2.25226	0.0279023	0.746993	0.379809	0.100106	0.88411	0.380337	0.827846
AC108471.2	0.39686	1.74213	2.25385	0.02806	0.746993	-0.116959	1.74213	-0.621653	0.536477	0.88785
COPS7A	-0.333342	6.47039	-2.29507	0.0277623	0.746993	-0.0730529	6.47039	-0.533368	0.597562	0.903133
HSPA1A	0.418112	3.44653	2.28868	0.0280658	0.746993	0.158118	3.44653	0.445069	0.657832	0.921763
MT-TC	0.643301	4.82311	2.25877	0.0277355	0.746993	0.0814508	4.82311	0.25289	0.801192	0.956572
ABCE1	0.243118	6.57823	2.25452	0.028103	0.746993	-0.0257864	6.57823	-0.243157	0.808749	0.958014
ELMOD1	-0.573077	6.14133	-2.29165	0.0276616	0.746993	0.0443673	6.14133	0.205511	0.838807	0.964788
EIF1AD	0.239401	4.61972	2.26853	0.0275438	0.746993	-0.014074	4.61972	-0.125956	0.90021	0.97942
RTKN	-0.496214	3.47688	-2.25083	0.0279543	0.746993	-0.0144209	3.47688	-0.120404	0.904919	0.9804
LARP1B	0.273784	4.03724	2.24885	0.0281916	0.748119	-0.152005	4.03724	-1.45832	0.150221	0.752666
EMD	-0.256935	5.06265	-2.30714	0.0288765	0.754734	-0.28459	5.06265	-2.76087	0.0115321	0.74447
KCNJ5	-1.4015	1.01222	-2.26008	0.029048	0.754734	-1.08527	1.01222	-1.69329	0.0970482	0.74447
RGS11	-0.796644	1.77978	-2.23714	0.0290112	0.754734	0.424528	1.77978	1.59676	0.117028	0.74447
APOBEC3F	-1.26449	0.622405	-2.2396	0.0287612	0.754734	0.347317	0.622405	1.13389	0.268391	0.795849
MT-CO1	0.353961	12.5501	2.25626	0.0289413	0.754734	0.136107	12.5501	0.901458	0.372276	0.824821
GMPR2	-0.199442	6.33914	-2.24601	0.0284969	0.754734	0.0551851	6.33914	0.642036	0.523304	0.882077
STK19	-0.267348	4.09669	-2.24005	0.0286819	0.754734	-0.0610356	4.09669	-0.628588	0.531928	0.886575
GSK3B	0.218527	6.54374	2.24201	0.0289724	0.754734	0.049339	6.54374	0.514483	0.608889	0.907604
HPDL	1.06183	-0.473784	2.29818	0.0288886	0.754734	0.284441	-0.473784	0.484972	0.629789	0.914214
USP1	0.349566	4.90837	2.23759	0.0289195	0.754734	-0.037037	4.90837	-0.347334	0.730044	0.941064
TRMT1L	0.305696	4.83991	2.33182	0.0286293	0.754734	-0.0440421	4.83991	-0.304093	0.763003	0.951108
SASS6	0.453235	2.83391	2.25779	0.0289154	0.754734	-0.0498252	2.83391	-0.294735	0.770181	0.951536
SNHG5	0.470686	4.83865	2.27684	0.0287222	0.754734	0.0316295	4.83865	0.181368	0.857671	0.968084
SKIV2L	-0.312161	4.59698	-2.2398	0.0291634	0.756517	-0.111443	4.59698	-1.0824	0.286899	0.797897
XYLT2	-0.540716	4.31073	-2.26116	0.0292448	0.757411	-0.278019	4.31073	-1.52877	0.143522	0.752547
INO80	0.410353	3.44591	2.22658	0.0296246	0.761521	-0.132227	3.44591	-1.1004	0.276706	0.796883
SBNO1	0.188307	6.86476	2.23315	0.029639	0.761521	0.0666224	6.86476	0.815635	0.418192	0.847202
COX10	0.205884	5.28118	2.24685	0.0294563	0.761521	0.0326975	5.28118	0.326873	0.745008	0.944805
PTMAP5	-0.544971	2.64722	-2.2336	0.0295895	0.761521	0.0615622	2.64722	0.229259	0.819432	0.960166
FKBP8	-0.25071	6.77173	-2.24204	0.029593	0.761521	0.00963979	6.77173	0.0919021	0.927182	0.984624
AC133552.5	-0.601512	1.37442	-2.24301	0.0303549	0.764547	0.668543	1.37442	2.41063	0.0200018	0.74447
GATAD2B	0.40125	4.29049	2.26101	0.0305975	0.764547	0.309782	4.29049	1.93841	0.0643174	0.74447
HMGN2P46	-0.460379	1.96259	-2.21959	0.0305653	0.764547	-0.309461	1.96259	-1.66247	0.102489	0.74447
RNF214	0.218913	3.95819	2.20384	0.0314599	0.764547	0.132575	3.95819	1.5685	0.122629	0.74447
TMEM237	-0.281472	6.31618	-2.24357	0.0298687	0.764547	-0.258889	6.31618	-2.18246	0.0347703	0.74447
AC087783.2	-1.86166	1.23983	-2.3274	0.0301579	0.764547	-1.15585	1.23983	-1.64667	0.123736	0.744994
AC009403.2	1.61582	0.594792	2.20984	0.0308526	0.764547	-0.51132	0.594792	-1.57664	0.125962	0.746138
YWHAZP4	-0.453636	1.72118	-2.20563	0.0311257	0.764547	0.378298	1.72118	1.39893	0.166816	0.753298
SLC44A2	-0.347839	7.43423	-2.21613	0.0313692	0.764547	-0.191718	7.43423	-1.39567	0.17058	0.754818
OVCH1-AS1	-0.484043	1.72344	-2.23993	0.0301226	0.764547	0.303981	1.72344	1.38055	0.173738	0.755544
PURA	0.492648	3.00267	2.20481	0.0311861	0.764547	0.238962	3.00267	1.29153	0.201313	0.762421
TMCO6	-0.343976	2.80196	-2.20162	0.0314363	0.764547	0.172361	2.80196	1.25811	0.21309	0.766649
BMS1	0.197291	5.73328	2.21339	0.030617	0.764547	-0.0938412	5.73328	-1.24271	0.218883	0.768545
CALM2P2	-0.342158	4.21084	-2.21891	0.0311323	0.764547	0.216954	4.21084	1.17463	0.244738	0.783854
ATP6V0B	-0.258347	8.756	-2.22263	0.0310047	0.764547	-0.129409	8.756	-1.10193	0.27569	0.796883
HLTF	0.226862	6.81895	2.23107	0.0304583	0.764547	0.103906	6.81895	1.11467	0.271334	0.796883
GRIA1	-0.818233	5.90117	-2.21195	0.0307077	0.764547	0.248616	5.90117	1.01375	0.316282	0.809597
PTPN12	0.292292	4.70032	2.21977	0.0303711	0.764547	0.0960506	4.70032	0.870633	0.388085	0.833357
CCT8P1	-0.472279	1.73899	-2.231	0.0302366	0.764547	-0.199358	1.73899	-0.865633	0.390308	0.834471
CAD	-0.410756	5.16927	-2.21837	0.0303756	0.764547	-0.112989	5.16927	-0.866707	0.391444	0.835574
INTS13	0.339925	5.2888	2.24279	0.0302832	0.764547	-0.11795	5.2888	-0.851836	0.400091	0.839614
PTGS1	-1.47012	1.70957	-2.26793	0.0301915	0.764547	-0.578441	1.70957	-0.826977	0.413083	0.845043
TRO	-0.274889	8.15091	-2.21173	0.0314009	0.764547	-0.0993042	8.15091	-0.824052	0.413641	0.845083
CCT4	0.198943	8.05617	2.22329	0.0305257	0.764547	-0.0691976	8.05617	-0.79535	0.429954	0.852574
AC009533.1	1.76855	0.233697	2.20328	0.0312995	0.764547	-0.310164	0.233697	-0.791662	0.435619	0.854064
FAM156B	-0.652906	0.895096	-2.20535	0.0312014	0.764547	0.178213	0.895096	0.734747	0.465462	0.864163
TIAL1	0.332823	4.42297	2.20785	0.030971	0.764547	-0.0820966	4.42297	-0.698953	0.487326	0.870121
ARF3	-0.176717	6.71043	-2.21661	0.0314375	0.764547	0.0472917	6.71043	0.616059	0.540826	0.888964
FAM98A	0.275554	5.87989	2.20572	0.0312306	0.764547	-0.064339	5.87989	-0.581035	0.563431	0.896176
HSPD1P1	-0.402646	3.26199	-2.21263	0.0306667	0.764547	0.0586776	3.26199	0.372874	0.710552	0.936426
SNX17	-0.271266	7.46297	-2.27922	0.0306189	0.764547	-0.0404543	7.46297	-0.359691	0.722301	0.939613
GALNS	-0.257974	5.29853	-2.22728	0.0305503	0.764547	-0.0246868	5.29853	-0.249242	0.804529	0.957386
PEBP1P2	-0.416067	2.05798	-2.20565	0.0312849	0.764547	-0.0436774	2.05798	-0.213028	0.832004	0.96265
NFYB	0.342534	5.44307	2.22235	0.0299416	0.764547	-0.0263318	5.44307	-0.198729	0.843136	0.965967
AKAP7	-0.586577	3.54464	-2.21053	0.0307731	0.764547	-0.0263784	3.54464	-0.184878	0.854575	0.967203
AC007256.1	-0.593585	0.150684	-2.21825	0.0302097	0.764547	0.00404739	0.150684	0.0141513	0.988755	0.997457
API5	0.263057	7.52198	2.2141	0.0316951	0.768544	0.0326139	7.52198	0.28384	0.777792	0.951897
HEATR6	-0.348144	5.32173	-2.24965	0.0317195	0.768544	-0.0017602	5.32173	-0.0123651	0.990234	0.99764
TAP1	-1.70125	2.66685	-2.20123	0.0317696	0.768606	0.00423405	2.66685	0.0208998	0.983425	0.995498
AC010326.4	1.1964	-0.562683	2.17604	0.033404	0.769679	0.535002	-0.562683	1.73318	0.0890941	0.74447
AL138762.1	-0.523946	1.35376	-2.20364	0.0336825	0.769679	0.430656	1.35376	1.72974	0.0907304	0.74447
CLCN7	-0.336305	5.54285	-2.18317	0.0335265	0.769679	-0.203367	5.54285	-1.73662	0.0923157	0.74447
COBLL1	-1.64786	1.66484	-2.18034	0.0330841	0.769679	-0.62191	1.66484	-1.67518	0.11314	0.74447
EIF4B	0.158179	6.9648	2.19579	0.0327445	0.769679	0.111274	6.9648	1.67242	0.101157	0.74447
FAM192BP	-0.513272	0.667654	-2.17376	0.0335505	0.769679	0.684335	0.667654	3.02009	0.00366692	0.74447
FNBP4	0.281751	4.8589	2.17263	0.0338225	0.769679	0.203631	4.8589	2.14884	0.0374662	0.74447
KCNQ1OT1	0.587937	4.35881	2.1683	0.0340895	0.769679	0.602634	4.35881	2.9551	0.00480291	0.74447
LINC00654	-1.1507	0.0638078	-2.32421	0.0337432	0.769679	-2.11386	0.0638078	-2.5178	0.0146706	0.74447
SDHAF2	-0.303966	3.53784	-2.17511	0.0334899	0.769679	-0.199746	3.53784	-1.60673	0.113262	0.74447
TXLNGY	-0.254646	4.59168	-2.18062	0.0330151	0.769679	0.23634	4.59168	2.36424	0.0212136	0.74447
TUSC3	-0.221307	8.47967	-2.2114	0.03284	0.769679	-0.143118	8.47967	-1.49388	0.143672	0.752547
LINC02256	1.4205	-1.12661	2.1683	0.0339822	0.769679	0.53379	-1.12661	1.40585	0.164762	0.753298
AL161787.1	-0.544345	0.973463	-2.16949	0.0338871	0.769679	0.416759	0.973463	1.35051	0.18176	0.756167
AC093512.2	0.600011	1.29857	2.19454	0.0319749	0.769679	-0.235953	1.29857	-1.32486	0.192131	0.761186
AL513166.2	-0.8101	0.254715	-2.19501	0.031916	0.769679	0.515059	0.254715	1.23047	0.223168	0.769628
ZNF577	0.437982	3.63705	2.19009	0.0329998	0.769679	0.179325	3.63705	1.21115	0.235647	0.776619
EEF1D	0.19865	4.69032	2.17293	0.0339046	0.769679	0.100716	4.69032	1.12159	0.266551	0.794733
AC244669.1	0.680949	0.151777	2.21722	0.0325778	0.769679	-0.488794	0.151777	-1.09527	0.277678	0.796883
TRMT44	0.283653	3.15825	2.16747	0.0341264	0.769679	0.109676	3.15825	1.10282	0.275194	0.796883
AL133482.1	-1.57363	-1.16634	-2.20096	0.0323325	0.769679	0.512213	-1.16634	1.08182	0.293626	0.798861
AL356481.1	0.982343	0.0478915	2.19163	0.032414	0.769679	0.388875	0.0478915	1.04588	0.300546	0.801444
PGF	-0.944009	2.96976	-2.28621	0.0340441	0.769679	0.467137	2.96976	1.01436	0.319275	0.809684
ATG16L2	-0.759276	2.02314	-2.19483	0.0321944	0.769679	-0.198776	2.02314	-0.82297	0.416248	0.845893
SERHL2	-1.18221	-0.263256	-2.17484	0.0338935	0.769679	0.349844	-0.263256	0.78937	0.434128	0.854064
SEH1L	0.199464	6.52715	2.1919	0.0323933	0.769679	-0.0698704	6.52715	-0.750299	0.455963	0.860314
H3F3C	-0.425593	2.86634	-2.19459	0.0321327	0.769679	0.15051	2.86634	0.748726	0.456869	0.861072
LRRC20	-0.325115	5.13059	-2.17153	0.0340894	0.769679	0.0967971	5.13059	0.738135	0.463754	0.863697
UBBP4	-0.489852	2.84729	-2.18233	0.0336901	0.769679	-0.19496	2.84729	-0.730174	0.468075	0.86501
PSMA6P1	-0.376517	2.12461	-2.16819	0.0339907	0.769679	0.154604	2.12461	0.723185	0.472286	0.865939
GLYR1	-0.236138	6.49102	-2.2322	0.0325371	0.769679	-0.0686046	6.49102	-0.706891	0.485884	0.869994
SELENOTP1	-0.427749	2.21222	-2.19393	0.0326807	0.769679	-0.13187	2.21222	-0.648958	0.518941	0.880932
TTC38	-0.752508	4.38953	-2.17928	0.0331283	0.769679	-0.106421	4.38953	-0.518684	0.606207	0.905726
ARFGAP2	-0.192655	7.096	-2.19222	0.0323927	0.769679	-0.0416546	7.096	-0.491944	0.624586	0.912817
EIF2B1	-0.216737	6.13767	-2.18255	0.0341558	0.769679	-0.0440005	6.13767	-0.484672	0.630505	0.914418
AC068057.1	-1.34689	-1.24471	-2.17079	0.0338169	0.769679	0.145454	-1.24471	0.444645	0.658693	0.921806
CALCB	-0.921933	0.0646987	-2.23749	0.0324967	0.769679	0.37853	0.0646987	0.428172	0.670073	0.924612
RBM42	-0.25328	5.84438	-2.1799	0.0339144	0.769679	-0.0430385	5.84438	-0.404581	0.687637	0.929033
GPM6A	-0.602666	9.31077	-2.24589	0.0324621	0.769679	0.0951905	9.31077	0.376958	0.709431	0.935774
BMPR1B-DT	-1.28767	-1.82174	-2.18505	0.0326769	0.769679	0.128812	-1.82174	0.370421	0.713023	0.937247
BAALC-AS2	-0.713026	1.06786	-2.21136	0.0336228	0.769679	-0.0898345	1.06786	-0.298493	0.767395	0.95125
FBXL4	-0.272999	4.79778	-2.18194	0.0331762	0.769679	-0.0276369	4.79778	-0.25153	0.802343	0.957018
ECM2	1.69998	0.543688	2.17966	0.0338087	0.769679	-0.100964	0.543688	-0.230202	0.822296	0.960812
AL138756.1	-0.622497	2.41798	-2.17546	0.0337708	0.769679	-0.050761	2.41798	-0.221148	0.825988	0.961431
TM6SF2	-1.2239	-1.09368	-2.17878	0.0331578	0.769679	0.0349338	-1.09368	0.106124	0.915827	0.981981
STARD13	-0.810188	3.86229	-2.19794	0.0331067	0.769679	-0.0332873	3.86229	-0.104746	0.917191	0.982231
ZNF418	0.482394	3.221	2.19916	0.0337031	0.769679	-0.0190037	3.221	-0.102715	0.918977	0.983003
POP5	-0.410727	5.14662	-2.18785	0.0335164	0.769679	-0.0119051	5.14662	-0.0773381	0.938817	0.985475
LYPLA1P3	-0.381524	1.80245	-2.20603	0.0320545	0.769679	-0.00100047	1.80245	-0.00425997	0.996615	0.999319
UVSSA	0.526051	3.02927	2.16576	0.0341952	0.769679	-0.000474771	3.02927	-0.00274098	0.997823	0.999555
A1BG-AS1	-0.471348	1.54674	-2.14153	0.0362697	0.771315	0.350308	1.54674	1.73989	0.0869827	0.74447
ADM2	1.69039	-0.392345	2.15075	0.0354044	0.771315	-1.24634	-0.392345	-1.75948	0.0834323	0.74447
CALCOCO1	-0.252569	5.91605	-2.15577	0.0360163	0.771315	0.170101	5.91605	1.70211	0.0969355	0.74447
ESCO1	0.246284	4.62813	2.16134	0.0348199	0.771315	0.232254	4.62813	2.51823	0.0152055	0.74447
MED13L	0.428768	4.39848	2.17752	0.0360472	0.771315	0.331549	4.39848	1.86446	0.0727462	0.74447
RPL22	0.238793	5.32366	2.16211	0.0354313	0.771315	0.20167	5.32366	1.87076	0.0671655	0.74447
RSPH9	-0.435233	3.87142	-2.16518	0.034473	0.771315	0.317308	3.87142	1.70574	0.093367	0.74447
SMG9	-0.260558	4.03314	-2.13309	0.0368831	0.771315	0.168778	4.03314	2.05012	0.0445879	0.74447
SREK1	0.218164	5.82474	2.15463	0.036499	0.771315	0.281142	5.82474	3.22624	0.00276881	0.74447
SST	-1.08141	3.98153	-2.20168	0.0350794	0.771315	-0.835593	3.98153	-1.43486	0.157817	0.752666
GOLGA4	0.423767	4.89307	2.14213	0.0361418	0.771315	0.146982	4.89307	1.39809	0.169072	0.754818
HNRNPA1L2	-0.251859	3.71328	-2.15819	0.0349225	0.771315	-0.152658	3.71328	-1.38632	0.170711	0.754818
AC005000.1	-0.443097	1.19253	-2.16353	0.0343632	0.771315	0.278099	1.19253	1.33494	0.186777	0.758619
KLHL20	0.240154	5.87483	2.16583	0.0357615	0.771315	0.13723	5.87483	1.2718	0.210169	0.765936
LBHD1	0.866577	-0.268441	2.14415	0.0359492	0.771315	0.391608	-0.268441	1.25003	0.215986	0.768545
RIOK2	0.198382	5.63367	2.13675	0.0365715	0.771315	0.117717	5.63367	1.21701	0.228214	0.772084
N4BP2	0.339468	5.4539	2.15897	0.036784	0.771315	0.169134	5.4539	1.18981	0.242593	0.782425
RRAGA	-0.149698	7.63214	-2.14918	0.0367462	0.771315	-0.079048	7.63214	-1.17196	0.247119	0.784152
SEC63	0.191451	6.6404	2.16305	0.0352949	0.771315	0.094568	6.6404	1.15121	0.255451	0.787568
SYCE1L	-0.573428	1.32396	-2.16152	0.0346978	0.771315	0.281627	1.32396	1.14827	0.255456	0.787568
HMCES	-0.264339	6.3985	-2.21463	0.0347477	0.771315	-0.128834	6.3985	-1.12546	0.270568	0.796883
SHISA5	-0.219828	8.68027	-2.16213	0.0357297	0.771315	-0.104874	8.68027	-1.09008	0.28155	0.796883
AKR1B1	-0.248921	7.70445	-2.19421	0.0356384	0.771315	-0.120959	7.70445	-1.08551	0.286048	0.796961
HIGD1AP1	-0.563002	1.37537	-2.16279	0.0346771	0.771315	0.273248	1.37537	1.06138	0.292736	0.798861
RPL7AP30	-0.691166	0.568763	-2.13643	0.0368101	0.771315	0.336655	0.568763	1.06535	0.290952	0.798861
RRAS	-0.685964	2.9749	-2.14383	0.0362079	0.771315	-0.177288	2.9749	-0.929468	0.362952	0.82268
SLC17A7	-0.522784	1.0586	-2.21383	0.0368121	0.771315	-0.588501	1.0586	-0.790924	0.432197	0.853462
TBC1D22A	-0.290401	4.34823	-2.18272	0.0349879	0.771315	-0.100461	4.34823	-0.793968	0.43227	0.85347
TBCE	0.270927	5.48611	2.17627	0.0346711	0.771315	-0.0955176	5.48611	-0.781888	0.43821	0.855534
RNF219	0.27477	5.4241	2.1698	0.0365426	0.771315	-0.0984426	5.4241	-0.764616	0.449007	0.858453
C5orf49	-0.546712	3.80385	-2.14529	0.0360223	0.771315	0.106195	3.80385	0.717305	0.480609	0.868321
ZMYM5	0.273402	4.61166	2.14592	0.0362603	0.771315	-0.0807088	4.61166	-0.70515	0.483875	0.869659
C18orf65	1.03834	-0.617693	2.13341	0.0368735	0.771315	0.223877	-0.617693	0.674269	0.503252	0.877329
PRKG1	0.305904	5.09609	2.19487	0.0347689	0.771315	0.107408	5.09609	0.56538	0.573945	0.897587
ANKRD7	-1.24574	-0.163718	-2.21006	0.0348975	0.771315	-0.360766	-0.163718	-0.536748	0.593973	0.901585
RHBDD2	-0.310718	8.80517	-2.1836	0.0368929	0.771315	-0.0703008	8.80517	-0.518173	0.608593	0.907499
CLCN5	-0.248156	5.4776	-2.20643	0.0351198	0.771315	0.0612317	5.4776	0.49629	0.62244	0.911907
YWHAZP3	-0.356282	3.68563	-2.15453	0.0357946	0.771315	-0.102755	3.68563	-0.477601	0.634614	0.915918
PEX16	-0.240279	4.76415	-2.13428	0.036782	0.771315	-0.0616959	4.76415	-0.470965	0.639319	0.916298
ANKIB1	0.209451	5.67945	2.15628	0.0359513	0.771315	0.040164	5.67945	0.453998	0.652049	0.920453
USP11	-0.222726	9.13057	-2.15135	0.0353825	0.771315	0.0402774	9.13057	0.410531	0.682833	0.927771
USP2	-0.924839	1.12105	-2.1339	0.0368626	0.771315	0.0978209	1.12105	0.361186	0.720019	0.938999
PHF6	0.253206	6.96543	2.18461	0.0356309	0.771315	-0.0348844	6.96543	-0.317909	0.752654	0.947029
NDUFB11	-0.233966	7.25325	-2.14874	0.035568	0.771315	0.0323915	7.25325	0.293647	0.770008	0.951529
CASP3	0.355732	7.21298	2.15867	0.0359507	0.771315	-0.0460705	7.21298	-0.282516	0.778736	0.951897
AASS	-0.84537	3.74461	-2.15886	0.0348931	0.771315	-0.0400337	3.74461	-0.265898	0.791792	0.954778
PPP2R1A	-0.180885	9.42357	-2.14111	0.0363922	0.771315	-0.0179898	9.42357	-0.22284	0.824418	0.96127
AC133552.2	0.488551	1.13881	2.14794	0.0358403	0.771315	-0.0475159	1.13881	-0.188434	0.851152	0.967203
SEMA4F	-0.298843	6.08066	-2.1814	0.0359621	0.771315	0.0218023	6.08066	0.15011	0.881405	0.974271
TTF1	0.265757	3.53076	2.14352	0.0360021	0.771315	0.0127569	3.53076	0.131045	0.896164	0.978839
ANXA11	-0.911352	2.41804	-2.20493	0.0349191	0.771315	-0.0419834	2.41804	-0.123814	0.902945	0.980283
ZNF20	0.707382	-0.189148	2.1872	0.0362379	0.771315	-0.0305188	-0.189148	-0.082093	0.934932	0.984857
HOMER2	0.562208	3.6545	2.13957	0.0363867	0.771315	-0.0151783	3.6545	-0.0554065	0.955993	0.989464
AC078899.1	-0.497144	1.6355	-2.16169	0.0346401	0.771315	-0.0102374	1.6355	-0.045007	0.964248	0.992388
IVNS1ABP	0.326817	7.71992	2.17532	0.0359023	0.771315	0.00140046	7.71992	0.00975072	0.992275	0.997956
HARBI1	0.22583	3.92257	2.14096	0.0374126	0.77219	0.255746	3.92257	2.23788	0.0292598	0.74447
PHF3	0.242475	5.92147	2.13232	0.0373932	0.77219	0.209337	5.92147	2.31527	0.0255706	0.74447
THBS4	-0.777979	3.39183	-2.1484	0.0372991	0.77219	0.543036	3.39183	1.55427	0.127539	0.746138
PRCD	0.653833	1.12077	2.14767	0.0370014	0.77219	0.256972	1.12077	1.02088	0.315161	0.808719
TMEM187	0.491659	2.77418	2.12807	0.0373614	0.77219	0.113637	2.77418	0.682846	0.497848	0.874683
AC124242.1	0.492032	1.60037	2.17167	0.0373649	0.77219	0.120011	1.60037	0.48272	0.631819	0.914883
AC008808.2	-0.72458	-1.09207	-2.27454	0.0373607	0.77219	-0.216182	-1.09207	-0.412874	0.681318	0.927771
CHURC1	0.376425	5.61753	2.1305	0.0373029	0.77219	0.0487995	5.61753	0.320792	0.74958	0.946144
DERA	0.496043	4.87526	2.13606	0.0372391	0.77219	-0.0312216	4.87526	-0.173387	0.863333	0.970365
AP000428.2	-1.69143	-1.00146	-2.13082	0.0373306	0.77219	0.0252396	-1.00146	0.0560518	0.955937	0.989464
SEMA3C	-0.999602	6.59013	-2.21478	0.0375164	0.773344	-0.149369	6.59013	-0.315691	0.75477	0.947921
AL353622.1	1.65471	-0.440712	2.12806	0.0377426	0.776896	1.02978	-0.440712	2.03322	0.0534251	0.74447
COQ8B	-0.23416	4.52047	-2.13436	0.0377848	0.776896	0.0414679	4.52047	0.451942	0.653996	0.921065
ALDH6A1	-0.254408	5.64116	-2.12723	0.0380045	0.777669	0.203885	5.64116	2.23915	0.0318247	0.74447
CBLL1	0.209151	6.23134	2.12677	0.0392936	0.777669	0.182909	6.23134	1.84043	0.0722702	0.74447
GNG10	-0.618803	0.589609	-2.12215	0.0383691	0.777669	0.456157	0.589609	1.67003	0.100788	0.74447
HSPE1P2	-0.531689	1.04895	-2.09919	0.0400643	0.777669	0.42419	1.04895	1.89645	0.0629351	0.74447
MPHOSPH10	0.218174	4.83402	2.115	0.0387047	0.777669	0.195362	4.83402	2.08694	0.0413894	0.74447
NUDT6	-0.495613	1.97071	-2.09556	0.0402126	0.777669	0.314443	1.97071	1.90097	0.0624089	0.74447
SUV39H1	-0.33244	3.65439	-2.11995	0.038553	0.777669	-0.233164	3.65439	-1.75375	0.0861995	0.74447
METTL18	0.301765	3.69172	2.1253	0.0388459	0.777669	0.221066	3.69172	1.46723	0.148165	0.752666
HS6ST3	-0.77213	4.60015	-2.11801	0.0401711	0.777669	-0.498321	4.60015	-1.41419	0.164858	0.753298
CYHR1	-0.348577	4.24134	-2.12376	0.0404937	0.777669	0.185682	4.24134	1.37994	0.182248	0.7562
CRYBB2P1	-0.474488	5.01284	-2.13601	0.0390278	0.777669	-0.277248	5.01284	-1.30709	0.199459	0.762421
HEBP1	-0.512115	3.43017	-2.09974	0.039829	0.777669	-0.17201	3.43017	-1.18765	0.241636	0.781356
HTATIP2	0.405062	3.58849	2.15345	0.0388974	0.777669	-0.215718	3.58849	-1.18131	0.246667	0.783935
POLN	-1.24924	-0.279149	-2.11641	0.0383313	0.777669	0.412293	-0.279149	1.16756	0.247454	0.784374
ALDH7A1	-0.259931	7.23761	-2.13448	0.039852	0.777669	0.126117	7.23761	1.11481	0.273914	0.796883
TMEM131L	0.3535	5.12208	2.15521	0.038932	0.777669	0.181375	5.12208	1.0756	0.289533	0.798861
GUCY1A2	-0.471536	3.96947	-2.10954	0.038968	0.777669	-0.170529	3.96947	-1.00954	0.317006	0.809597
AC127070.2	0.853137	0.597342	2.13185	0.0385828	0.777669	0.377216	0.597342	0.996955	0.324569	0.809684
THOC1	0.279069	4.69273	2.10003	0.0399511	0.777669	0.0959685	4.69273	0.992192	0.326513	0.809819
FABP5P1	-0.56522	1.4988	-2.10029	0.0405653	0.777669	0.276147	1.4988	0.864073	0.39092	0.835226
MORF4L1P1	-0.270408	5.27806	-2.12208	0.0389113	0.777669	0.107611	5.27806	0.832151	0.409091	0.844929
CDK10	-0.588055	5.04498	-2.11634	0.0405329	0.777669	-0.173023	5.04498	-0.777843	0.444893	0.856726
HNRNPH1	0.193299	7.51455	2.17872	0.0391624	0.777669	-0.0663159	7.51455	-0.77463	0.44674	0.85735
METTL25	0.708833	1.40353	2.10513	0.0393451	0.777669	0.160521	1.40353	0.756683	0.452482	0.859049
TMEM234	-0.23792	3.69518	-2.10267	0.0405501	0.777669	0.0830648	3.69518	0.700952	0.48626	0.869994
GDI2	0.176124	8.84844	2.10861	0.0398182	0.777669	-0.0549385	8.84844	-0.668621	0.506623	0.877987
VMAC	-1.07073	-0.344711	-2.10124	0.0396912	0.777669	-0.205711	-0.344711	-0.628071	0.532264	0.886575
MUC20	-1.66736	-0.416164	-2.09697	0.0403212	0.777669	-0.320054	-0.416164	-0.622277	0.538818	0.888334
SNHG17	0.580413	4.63979	2.13918	0.0401579	0.777669	-0.167665	4.63979	-0.617106	0.541409	0.889033
NKX6-2	-1.77961	1.56635	-2.11655	0.0393968	0.777669	0.510815	1.56635	0.597451	0.55273	0.892554
SAYSD1	0.212596	4.40858	2.13009	0.0379537	0.777669	-0.055127	4.40858	-0.550312	0.584359	0.89973
LENG8-AS1	-0.604789	0.433711	-2.11842	0.0382066	0.777669	0.153766	0.433711	0.531259	0.597138	0.903114
LITAF	-0.52628	5.85686	-2.1183	0.0387735	0.777669	-0.0899027	5.85686	-0.477896	0.635799	0.915918
TMEM175	-0.313655	4.40244	-2.0979	0.0403741	0.777669	-0.0517917	4.40244	-0.472045	0.639736	0.916298
ERI2	0.353872	3.86298	2.11731	0.0382527	0.777669	0.0518925	3.86298	0.459478	0.647673	0.919319
G6PC3	-0.322691	7.32577	-2.14766	0.0379219	0.777669	-0.0640635	7.32577	-0.448184	0.656676	0.921371
MRM3	-0.239354	4.04714	-2.11089	0.0393272	0.777669	-0.0506143	4.04714	-0.443179	0.659278	0.921916
PPP1R2B	-0.474947	1.07421	-2.12204	0.0386506	0.777669	0.121515	1.07421	0.438818	0.662325	0.922267
C5orf38	0.877557	1.5989	2.10403	0.0398766	0.777669	0.117794	1.5989	0.360948	0.720019	0.938999
DNASE1L1	-0.385818	2.97639	-2.12658	0.0390562	0.777669	-0.0508132	2.97639	-0.347155	0.731201	0.941135
PIP4P1	-0.211973	6.09866	-2.11298	0.0396019	0.777669	-0.0343376	6.09866	-0.343166	0.732849	0.941985
NAA80	-0.352924	2.78678	-2.10522	0.0395758	0.777669	-0.0506882	2.78678	-0.340271	0.73493	0.942131
PGS1	-0.192661	5.43737	-2.10462	0.0395615	0.777669	-0.0290462	5.43737	-0.341625	0.733838	0.942131
NT5DC1	-0.490879	3.98777	-2.1687	0.0404748	0.777669	0.0709749	3.98777	0.326039	0.747637	0.945422
TRMO	-0.32068	3.65852	-2.10282	0.039904	0.777669	-0.0424276	3.65852	-0.299407	0.765728	0.951186
PRRT1	-1.04691	0.831998	-2.10632	0.0392695	0.777669	-0.109957	0.831998	-0.294556	0.769448	0.95125
AL353625.1	1.3017	-0.609956	2.11462	0.0385617	0.777669	0.0988651	-0.609956	0.26041	0.795447	0.955139
NOP14	0.340985	3.62648	2.11458	0.0390346	0.777669	0.0283475	3.62648	0.255798	0.800135	0.956534
FTH1P11	-0.491972	2.35298	-2.09854	0.0403421	0.777669	-0.0536156	2.35298	-0.247045	0.805796	0.957427
CD3EAP	0.607869	0.769768	2.12876	0.0380935	0.777669	-0.0526772	0.769768	-0.232093	0.81787	0.960025
CSTF3	0.167097	6.35067	2.10873	0.0391575	0.777669	-0.0166298	6.35067	-0.220952	0.825872	0.961431
RBM8A	0.199584	7.49883	2.1116	0.0404597	0.777669	0.0193094	7.49883	0.215418	0.830512	0.96265
WARS2-AS1	0.543968	1.82806	2.10759	0.0404045	0.777669	0.0360236	1.82806	0.175782	0.861709	0.969783
ZBTB22	-0.262151	4.5913	-2.13331	0.0383601	0.777669	-0.0224999	4.5913	-0.172863	0.863427	0.970365
CCDC106	-0.332061	3.78936	-2.10724	0.0392697	0.777669	0.0208425	3.78936	0.169516	0.866056	0.97083
EEF1A1P10	-0.71518	0.374169	-2.09924	0.0401208	0.777669	-0.0274266	0.374169	-0.0741047	0.941166	0.985854
NUDT2	-0.317693	4.57242	-2.11096	0.0397833	0.777669	-0.00400612	4.57242	-0.0259635	0.979381	0.9951
POGZ	0.315611	5.59204	2.1637	0.0406163	0.777726	0.234566	5.59204	1.72612	0.100363	0.74447
PPP1R32	-0.653165	1.06339	-2.09085	0.0406648	0.777732	0.0665525	1.06339	0.321113	0.74925	0.946087
RPSAP12	-0.494331	1.10995	-2.09329	0.0407263	0.777988	0.0974999	1.10995	0.357245	0.722121	0.939613
RPS27AP16	-0.345567	3.67219	-2.08945	0.0407768	0.778032	0.0809582	3.67219	0.434115	0.665712	0.92384
SNX33	-0.689514	2.56256	-2.09058	0.0408452	0.778419	-0.185363	2.56256	-1.24007	0.220348	0.768545
SARDH	-0.810722	1.84499	-2.14929	0.0409568	0.778638	0.263412	1.84499	0.659314	0.514388	0.880322
ATG4B	-0.214264	6.77205	-2.10972	0.0409726	0.778638	-0.0457764	6.77205	-0.480897	0.633415	0.914883
GHDC	-0.530897	2.42018	-2.0899	0.0410494	0.778638	-0.0380629	2.42018	-0.218484	0.828456	0.962038
AC058791.1	1.21547	0.193165	2.08671	0.0410331	0.778638	-0.0690477	0.193165	-0.17138	0.864556	0.970419
AP000462.2	0.708778	1.92785	2.08409	0.042423	0.77889	0.700163	1.92785	2.26086	0.0288812	0.74447
SCYL1	-0.209164	5.94116	-2.09119	0.0415579	0.77889	-0.152318	5.94116	-1.766	0.0849192	0.74447
SDHAP3	-0.493871	2.96893	-2.07438	0.0422022	0.77889	0.427633	2.96893	2.43523	0.0177721	0.74447
TBC1D5	0.131775	6.49805	2.07332	0.0423047	0.77889	0.132602	6.49805	2.3125	0.0240841	0.74447
WDR1	-0.406072	9.00881	-2.13152	0.0411287	0.77889	-0.309868	9.00881	-1.69993	0.100357	0.74447
ZNF502	0.301575	4.01984	2.11473	0.0424691	0.77889	0.246973	4.01984	1.76094	0.0881414	0.74447
ZNF638	0.206475	6.91101	2.07787	0.0423723	0.77889	0.195127	6.91101	2.19954	0.0324052	0.74447
TEAD1	-0.820272	4.66419	-2.07877	0.0417854	0.77889	-0.258113	4.66419	-1.39833	0.174652	0.755544
AC117503.5	0.82262	0.286038	2.0693	0.0426922	0.77889	-0.537528	0.286038	-1.35068	0.181706	0.756167
Z97353.1	-0.476445	1.07592	-2.07434	0.0425179	0.77889	0.339132	1.07592	1.27904	0.20565	0.764527
ARPC1A	0.212966	5.23604	2.09454	0.0423852	0.77889	-0.123105	5.23604	-1.14067	0.259661	0.791321
SMG1P5	0.702451	0.915853	2.09651	0.0417586	0.77889	0.311867	0.915853	1.07675	0.289389	0.798861
SORBS3	0.69312	2.9106	2.07806	0.041945	0.77889	-0.124432	2.9106	-1.01617	0.320332	0.809684
ACSS3	-1.08559	1.87921	-2.07781	0.0419279	0.77889	0.239714	1.87921	0.92134	0.369423	0.824581
TCP1P1	-0.517482	0.220866	-2.08132	0.0415405	0.77889	0.229621	0.220866	0.827622	0.411059	0.844929
ESRRB	-1.45535	-0.124342	-2.13685	0.0412955	0.77889	0.638413	-0.124342	0.776605	0.441312	0.855573
MRPL9	0.215917	5.13611	2.0776	0.0418942	0.77889	-0.0778147	5.13611	-0.719187	0.474728	0.867113
AL355488.1	1.35552	-0.83053	2.08124	0.0415488	0.77889	0.285081	-0.83053	0.694408	0.490734	0.871684
HOXB6	-2.43025	-1.3481	-2.07555	0.0427306	0.77889	-0.461406	-1.3481	-0.620333	0.542575	0.889441
FNDC7	-1.82915	-1.26975	-2.08996	0.0418222	0.77889	-0.353798	-1.26975	-0.596239	0.558621	0.895515
API5P1	-0.561052	0.328468	-2.08502	0.0411914	0.77889	-0.155892	0.328468	-0.54136	0.5902	0.901109
AC016394.1	0.435598	1.45112	2.08249	0.0427496	0.77889	0.098276	1.45112	0.506175	0.615298	0.909159
ALDH16A1	-0.383403	3.50799	-2.08067	0.0423657	0.77889	-0.0706374	3.50799	-0.443685	0.659454	0.922022
ERP29	-0.197723	7.21016	-2.07579	0.0420673	0.77889	0.0353607	7.21016	0.389082	0.698549	0.932295
SLC25A38	-0.232137	5.57387	-2.07949	0.0426645	0.77889	0.0391168	5.57387	0.374883	0.709402	0.935774
SDHDP6	-0.920232	-0.462007	-2.08133	0.0415396	0.77889	0.106637	-0.462007	0.334515	0.739176	0.943492
ZNF280C	0.252726	3.97234	2.08026	0.0416408	0.77889	0.0433001	3.97234	0.323847	0.747143	0.945247
CDK20	-0.277233	5.10974	-2.07568	0.0420776	0.77889	-0.0340705	5.10974	-0.315166	0.753694	0.947305
AL139260.1	0.484831	1.27865	2.07075	0.0425731	0.77889	0.059617	1.27865	0.288716	0.773767	0.951897
OLA1P1	-0.385977	1.74724	-2.07614	0.0420335	0.77889	-0.0563734	1.74724	-0.259771	0.795901	0.955356
EML2	-0.564012	4.85255	-2.12914	0.0413614	0.77889	-0.0626877	4.85255	-0.253812	0.801675	0.956909
MMP25-AS1	0.609745	1.55038	2.07625	0.0423275	0.77889	0.0627186	1.55038	0.241047	0.81042	0.958729
AL049873.1	-0.445166	2.19356	-2.08443	0.0412471	0.77889	-0.0601708	2.19356	-0.237199	0.813285	0.959216
ARSE	1.18416	0.213344	2.07235	0.0423983	0.77889	0.0615942	0.213344	0.192722	0.8483	0.967203
UBC	-0.262802	10.703	-2.07711	0.0420552	0.77889	-0.00917487	10.703	-0.0756342	0.939957	0.98551
OSER1-DT	0.338205	4.24527	2.07476	0.0428171	0.779242	0.388587	4.24527	2.56739	0.0131869	0.74447
C10orf143	-0.641407	1.15082	-2.068	0.0429704	0.779399	0.224372	1.15082	0.912294	0.365879	0.823886
NECTIN2	-0.393239	6.37641	-2.07137	0.0429636	0.779399	-0.0903131	6.37641	-0.556055	0.580745	0.897845
CUX2	0.914413	1.37571	2.07462	0.0429424	0.779399	0.0217399	1.37571	0.0579196	0.954086	0.989114
AL354920.1	0.375886	1.61868	2.06476	0.0431346	0.779751	0.464665	1.61868	2.20419	0.0312318	0.74447
PLEKHD1	-0.658138	1.0718	-2.15778	0.0430947	0.779751	0.747618	1.0718	1.60998	0.113201	0.74447
NCALD	-0.439132	8.56674	-2.09919	0.0430749	0.779751	0.281859	8.56674	1.39017	0.173715	0.755544
NOC2L	-0.18767	6.60465	-2.064	0.0432087	0.780219	-0.0130472	6.60465	-0.139866	0.889219	0.976056
XRCC6P2	-0.436894	2.99017	-2.06336	0.0432722	0.780493	-0.0591083	2.99017	-0.3006	0.764725	0.951108
AC078846.1	0.440134	2.53052	2.04635	0.0455476	0.780861	0.334403	2.53052	1.84859	0.0711295	0.74447
AC097376.2	0.450494	3.18334	2.05526	0.045365	0.780861	0.382371	3.18334	2.01254	0.051441	0.74447
CDCA5	-0.848624	3.36013	-2.0574	0.0455762	0.780861	-0.495371	3.36013	-1.92048	0.0825067	0.74447
LINC00174	0.341186	2.67102	2.04667	0.0449483	0.780861	0.267446	2.67102	2.18056	0.0334312	0.74447
LINC01355	1.02051	0.830018	2.04419	0.0451876	0.780861	0.644661	0.830018	2.36018	0.0214268	0.74447
PRCP	-0.590366	6.65097	-2.06708	0.0451226	0.780861	0.393346	6.65097	1.60197	0.120191	0.74447
SLC25A37	0.361474	3.67144	2.05639	0.0446399	0.780861	0.278383	3.67144	2.04769	0.0482309	0.74447
TMF1	0.162665	5.45118	2.04337	0.0454658	0.780861	0.121154	5.45118	1.7769	0.081074	0.74447
ZSWIM7	-0.3364	5.49543	-2.07437	0.0457238	0.780861	0.274583	5.49543	1.67407	0.102791	0.74447
CACNG5	1.10661	3.64027	2.0544	0.0442031	0.780861	-0.339707	3.64027	-1.51561	0.142247	0.751261
HOXB5	-2.43104	-0.0170647	-2.15954	0.0445576	0.780861	-1.43264	-0.0170647	-1.40155	0.185172	0.758619
ARHGEF10	-0.733183	-0.305137	-2.04196	0.0454295	0.780861	0.334963	-0.305137	1.31345	0.194593	0.762421
PNPLA3	0.594839	3.65678	2.07199	0.0454191	0.780861	-0.317599	3.65678	-1.31212	0.202693	0.763289
GPR139	-0.791844	-0.211801	-2.11415	0.0457148	0.780861	-1.00306	-0.211801	-1.28678	0.202963	0.763296
SLC22A17	-0.281469	7.29925	-2.07793	0.0445206	0.780861	0.134645	7.29925	1.0673	0.293643	0.798861
MYRF	-1.65091	-1.02454	-2.05497	0.0441187	0.780861	0.469867	-1.02454	1.02395	0.310935	0.806225
PLD3	-0.271641	9.95111	-2.05992	0.04482	0.780861	-0.123598	9.95111	-0.981203	0.331543	0.811361
KNDC1	-0.664436	2.41639	-2.04851	0.0452873	0.780861	0.258089	2.41639	0.969033	0.337835	0.812155
AC068831.7	-1.3266	-1.21806	-2.04153	0.0454592	0.780861	-0.308046	-1.21806	-0.945085	0.348284	0.816808
AL353746.1	1.02917	1.12647	2.08593	0.0454627	0.780861	-0.458332	1.12647	-0.872677	0.388273	0.833514
GSTZ1	-0.444318	3.78953	-2.07211	0.0438339	0.780861	0.180027	3.78953	0.866898	0.390494	0.834537
AIDA	0.250988	5.3763	2.05929	0.0439636	0.780861	-0.0939182	5.3763	-0.835658	0.40683	0.84411
LOXL3	-0.535724	3.75295	-2.05581	0.0442223	0.780861	-0.0942351	3.75295	-0.823867	0.413388	0.845083
AC022211.2	0.648353	0.564207	2.05561	0.0441616	0.780861	-0.237613	0.564207	-0.8021	0.425623	0.849803
CA11	-0.411978	4.19366	-2.07566	0.0447567	0.780861	0.174583	4.19366	0.78292	0.437395	0.855395
TARDBP	0.218131	6.61237	2.04013	0.0457237	0.780861	-0.0693226	6.61237	-0.727829	0.469583	0.86501
CPXM2	-1.77369	0.331509	-2.04407	0.0452208	0.780861	-0.370997	0.331509	-0.706684	0.483983	0.869659
TGM2	-2.47802	-0.838275	-2.05164	0.0448755	0.780861	0.520878	-0.838275	0.680333	0.503551	0.87737
EMC6	0.38611	1.82657	2.06326	0.0433959	0.780861	0.11657	1.82657	0.651417	0.517206	0.880586
DDRGK1	-0.232373	5.61826	-2.07273	0.0442177	0.780861	-0.061125	5.61826	-0.589813	0.558836	0.895596
EIF4E2	0.131745	6.68896	2.04556	0.0451253	0.780861	-0.0338941	6.68896	-0.54379	0.588544	0.900877
AP002784.2	-0.490108	1.48635	-2.046	0.0453585	0.780861	-0.130005	1.48635	-0.527056	0.600081	0.90414
COX6B2	-1.29996	-0.540614	-2.05376	0.0445421	0.780861	-0.212341	-0.540614	-0.500477	0.620505	0.910762
BOLA3-AS1	0.234828	5.15594	2.05392	0.0448855	0.780861	0.0695445	5.15594	0.48044	0.632606	0.914883
MRPS18C	-0.209641	4.59347	-2.04506	0.0452104	0.780861	0.0477194	4.59347	0.455443	0.650383	0.919584
PGDP1	-0.654139	0.205706	-2.06001	0.0436015	0.780861	-0.149885	0.205706	-0.441407	0.660454	0.92207
PABPC4	0.407019	3.98878	2.04085	0.0456555	0.780861	0.0859786	3.98878	0.425061	0.67227	0.924865
AC011504.1	0.619814	2.38858	2.08098	0.0441387	0.780861	-0.121337	2.38858	-0.422741	0.674983	0.926639
RPS2P5	-0.485901	6.16091	-2.06225	0.0453448	0.780861	0.0961805	6.16091	0.408423	0.684941	0.928324
CADPS2	-0.834426	4.40244	-2.04651	0.0455791	0.780861	0.100898	4.40244	0.362857	0.719792	0.938999
AC090114.1	-0.704846	0.400437	-2.05558	0.0441518	0.780861	-0.109506	0.400437	-0.316696	0.75254	0.946959
KCTD17	-0.254855	5.62303	-2.05681	0.0457568	0.780861	-0.0362518	5.62303	-0.312479	0.75633	0.948351
AATF	0.297511	5.19821	2.04182	0.045669	0.780861	0.0293574	5.19821	0.236564	0.813895	0.959216
WASHC2A	0.258267	5.46081	2.05708	0.0442399	0.780861	0.0228108	5.46081	0.213116	0.832088	0.96265
LYPD3	-1.23404	0.0929225	-2.03997	0.0456197	0.780861	0.0959747	0.0929225	0.208094	0.835838	0.963501
AL157394.2	-1.40504	-1.5078	-2.05414	0.0449975	0.780861	0.0938503	-1.5078	0.197872	0.844911	0.966629
SRPRA	-0.287999	6.3487	-2.09726	0.0447759	0.780861	0.0218531	6.3487	0.172906	0.864248	0.970372
GPR89A	0.282542	3.76625	2.04429	0.0454478	0.780861	-0.0152085	3.76625	-0.120343	0.904633	0.9804
NUP35	0.239781	4.57897	2.04718	0.0448901	0.780861	0.00989019	4.57897	0.105593	0.916255	0.981981
MPP6	0.449171	4.44831	2.0762	0.0445579	0.780861	0.016874	4.44831	0.0872925	0.931023	0.984857
DDX60L	-1.55968	1.28371	-2.05603	0.0440817	0.780861	-0.0148354	1.28371	-0.0431577	0.96579	0.992568
PRR5L	-1.55765	1.83372	-2.03791	0.0459068	0.781696	0.450515	1.83372	1.24517	0.234357	0.776218
PSMC1P1	-0.330053	2.44006	-2.0443	0.0459216	0.781696	-0.154755	2.44006	-0.867149	0.389329	0.834045
LYPD1	-0.542697	4.39293	-2.03494	0.0461384	0.781696	0.129024	4.39293	0.823038	0.415057	0.845228
HIST1H1D	1.43136	-0.0147695	2.03568	0.0460622	0.781696	-0.281492	-0.0147695	-0.720175	0.475661	0.867113
PTCD1	0.499866	1.52449	2.03728	0.0461105	0.781696	0.0977934	1.52449	0.488146	0.627528	0.913542
AL109976.1	-1.56293	-1.30388	-2.03753	0.0461443	0.781696	-0.196169	-1.30388	-0.393726	0.696743	0.931698
BBOF1	0.42392	3.32503	2.04275	0.0461008	0.781696	-0.0552848	3.32503	-0.363334	0.719039	0.938658
TAGLN2	-0.537212	7.2803	-2.03513	0.0462275	0.782286	-0.110625	7.2803	-0.541492	0.590468	0.901109
LUC7L3	0.364064	5.97894	2.05832	0.0462868	0.782469	0.290097	5.97894	2.0318	0.0547334	0.74447
ZNF770	0.228292	6.51252	2.06733	0.0464732	0.784176	0.292697	6.51252	2.78621	0.0091458	0.74447
TCERG1	0.211385	6.37782	2.04382	0.0464848	0.784176	0.0561699	6.37782	0.626721	0.534638	0.887288
AC017101.1	0.790792	0.0134042	2.03165	0.0466882	0.785966	1.01416	0.0134042	2.24269	0.0285076	0.74447
VPS33B	0.240231	2.62751	2.02988	0.0466653	0.785966	0.0795791	2.62751	0.669194	0.505856	0.877987
AC005261.2	0.371757	4.19551	2.02648	0.0485005	0.78648	0.311785	4.19551	1.70992	0.0937382	0.74447
CCDC160	-0.777132	2.0684	-2.03335	0.0472575	0.78648	-0.415569	2.0684	-1.64131	0.118024	0.74447
MT-ND2	0.385018	9.4209	2.03403	0.0469894	0.78648	0.300352	9.4209	1.67382	0.100214	0.74447
PARVA	-0.832123	4.57793	-2.02478	0.0472317	0.78648	-0.384487	4.57793	-1.77717	0.0885657	0.74447
PGBD4	0.408432	3.03407	2.03508	0.0487254	0.78648	0.561668	3.03407	2.74245	0.00891072	0.74447
SEC22B4P	0.491815	0.65732	2.03483	0.0487626	0.78648	-0.540678	0.65732	-2.01562	0.0492636	0.74447
USP14	0.145745	7.34237	2.03966	0.0468765	0.78648	-0.108841	7.34237	-1.57771	0.121239	0.74447
AC079385.1	-1.34901	-0.772727	-2.01249	0.0485203	0.78648	0.535682	-0.772727	1.3724	0.177893	0.755938
COMMD3	0.195907	4.42535	2.02321	0.047369	0.78648	0.128233	4.42535	1.24317	0.218488	0.768545
NUP58	0.191033	6.63001	2.0326	0.0470624	0.78648	-0.115149	6.63001	-1.24938	0.216824	0.768545
CCDC57	-0.600727	2.31687	-2.01552	0.0481906	0.78648	0.182517	2.31687	1.15931	0.254319	0.787568
ST6GALNAC5	-0.92418	4.64467	-2.05378	0.0485082	0.78648	0.434968	4.64467	1.09674	0.28494	0.796961
TNFRSF1A	-0.468737	5.18535	-2.02545	0.0471379	0.78648	-0.148594	5.18535	-1.07354	0.289482	0.798861
AC012085.1	-0.510438	3.21128	-2.02769	0.0481302	0.78648	-0.25883	3.21128	-1.02042	0.312275	0.807507
ABCD4	-0.232247	5.43462	-2.01457	0.0483012	0.78648	0.0878163	5.43462	1.00266	0.320138	0.809684
AC093157.1	0.460372	3.82035	2.06489	0.0472077	0.78648	0.188309	3.82035	0.909049	0.371675	0.824821
MRPL30	0.151967	5.6074	2.01051	0.0487317	0.78648	0.0710336	5.6074	0.899483	0.371876	0.824821
ZNF669	0.393264	4.68964	2.13244	0.047616	0.78648	0.17346	4.68964	0.904026	0.376728	0.825532
AC048341.2	0.7955	1.27541	2.0192	0.0480686	0.78648	0.282601	1.27541	0.840418	0.404454	0.842557
AC073861.1	-0.381044	4.21501	-2.01691	0.0480406	0.78648	0.163622	4.21501	0.759473	0.450448	0.858453
WDFY3	0.33584	5.35793	2.01813	0.0479525	0.78648	0.109484	5.35793	0.755103	0.453104	0.859049
NUP62CL	0.780673	0.602049	2.01362	0.0487266	0.78648	-0.261831	0.602049	-0.720738	0.474012	0.867113
DLEU2	0.574581	2.49526	2.01537	0.0482095	0.78648	-0.118551	2.49526	-0.621981	0.536687	0.88785
NPIPB5	0.871519	0.580993	2.01474	0.0482742	0.78648	0.142312	0.580993	0.618064	0.538797	0.888334
2021-03-07	0.186331	7.40131	2.01965	0.0482619	0.78648	-0.0487311	7.40131	-0.567103	0.57299	0.897587
HDAC2	0.238669	8.71099	2.07015	0.0468437	0.78648	-0.0580359	8.71099	-0.512121	0.612276	0.909091
NAA50	0.21456	6.91926	2.02127	0.0482201	0.78648	-0.0484013	6.91926	-0.496108	0.621945	0.911513
ACAD10	-0.410796	4.45498	-2.03205	0.047956	0.78648	-0.0589696	4.45498	-0.412016	0.685126	0.92834
LSM12P1	-0.289389	2.32164	-2.02565	0.0471099	0.78648	-0.0596911	2.32164	-0.402371	0.688795	0.929126
RPL10AP6	-0.425073	2.68819	-2.01858	0.047862	0.78648	0.0800898	2.68819	0.359676	0.720312	0.939038
UMAD1	-0.352384	4.42714	-2.03135	0.0476723	0.78648	0.0467211	4.42714	0.296642	0.768161	0.95125
RXYLT1	0.268615	3.91974	2.01605	0.0481326	0.78648	0.0261032	3.91974	0.223656	0.82376	0.961021
EEF2KMT	-0.336068	3.62372	-2.03691	0.047459	0.78648	-0.0337652	3.62372	-0.213916	0.831599	0.96265
TC2N	-1.44902	1.31964	-2.0251	0.0471743	0.78648	0.0499559	1.31964	0.163436	0.871954	0.972267
AGO2	0.424876	4.70206	2.01287	0.0485203	0.78648	0.0287957	4.70206	0.158235	0.8748	0.972311
CABLES1	0.917094	0.033473	2.03535	0.0474661	0.78648	0.0554393	0.033473	0.111094	0.91194	0.98182
RBBP4P1	-0.335829	2.41825	-2.01136	0.0486395	0.78648	0.0169174	2.41825	0.105787	0.916093	0.981981
ABCF1	-0.231074	5.18111	-2.01842	0.0478809	0.78648	0.00429661	5.18111	0.0526382	0.958207	0.990001
CEP85L	0.262145	6.12632	2.07567	0.0486053	0.78648	-0.00768766	6.12632	-0.049784	0.960526	0.991065
PIWIL2	1.5116	1.62983	2.28054	0.0474444	0.78648	-0.0160371	1.62983	-0.0171808	0.986403	0.996451
PIGS	-0.22231	6.91409	-2.03669	0.0473484	0.78648	-0.000892459	6.91409	-0.00821392	0.99348	0.998422
FBXL12	-0.262004	3.79309	-2.01569	0.048219	0.78648	7.63639e-05	3.79309	0.000617962	0.999509	0.999718
KLHDC8A	-0.346787	6.82433	-2.03078	0.048964	0.7877	0.313828	6.82433	2.01898	0.0517226	0.74447
SETD6	0.375089	3.052	2.04717	0.049082	0.7877	-0.107306	3.052	-0.493144	0.624132	0.912517
ATP8B2	0.330426	4.48224	2.00939	0.0489262	0.7877	-0.0597821	4.48224	-0.408531	0.684326	0.927982
DHRS1	-0.415931	4.59653	-2.02879	0.0490109	0.7877	0.0592508	4.59653	0.321823	0.749632	0.946144
PUF60	-0.20638	8.0673	-2.00986	0.0490541	0.7877	0.000410568	8.0673	0.0042759	0.996603	0.999319
CD99	-0.681322	5.84053	-2.00683	0.0491418	0.787878	0.168274	5.84053	1.09384	0.285227	0.796961
PFN1P1	-0.584396	2.22118	-2.00519	0.0493133	0.788281	-0.244363	2.22118	-0.91305	0.364753	0.8234
PBXIP1	-0.741294	5.10541	-2.01101	0.0492959	0.788281	-0.151829	5.10541	-0.706662	0.491308	0.87188
RPS20P14	-0.653502	-0.137569	-2.00607	0.0492161	0.788281	0.0871874	-0.137569	0.247634	0.805236	0.957386
DPM3	-0.381917	3.72742	-2.00621	0.0494567	0.789012	0.292698	3.72742	1.67057	0.100167	0.74447
CCDC124	-0.260809	5.28891	-2.00408	0.0494356	0.789012	0.0866889	5.28891	0.699393	0.486922	0.870032
HSP90AA2P	-0.338346	3.58324	-2.00308	0.0495455	0.78965	0.0650292	3.58324	0.401668	0.689309	0.929126
SULT1C4	-1.17435	2.59303	-2.00236	0.0496252	0.790141	0.253492	2.59303	1.39174	0.168974	0.754818
CST3	-0.291074	6.66928	-1.99952	0.0500853	0.791925	0.231939	6.66928	1.7734	0.0813182	0.74447
MOSPD1	0.203844	5.30074	1.99438	0.051469	0.791925	-0.166899	5.30074	-1.61278	0.112554	0.74447
PRICKLE2	0.222304	5.639	2.00387	0.0500687	0.791925	0.18435	5.639	1.60198	0.114554	0.74447
TCEANC2	-0.325016	3.5013	-1.98456	0.0516237	0.791925	0.245884	3.5013	2.07222	0.0424098	0.74447
ZNF28	0.305488	5.51997	1.99507	0.0510519	0.791925	0.183041	5.51997	1.27867	0.206581	0.764527
PTDSS2	-0.310351	5.76384	-1.99047	0.0511801	0.791925	-0.175356	5.76384	-1.24205	0.219241	0.768545
SPDYE5	0.905065	-0.682585	1.99178	0.0508047	0.791925	0.351186	-0.682585	1.22598	0.224841	0.769628
TP53I13	-0.564917	3.76673	-1.99924	0.049971	0.791925	-0.184413	3.76673	-1.23275	0.226113	0.770282
MYC	0.5311	4.82802	2.04263	0.0506567	0.791925	-0.393418	4.82802	-1.20153	0.235366	0.776619
MAX	0.210751	6.03388	2.05335	0.0499853	0.791925	0.123047	6.03388	1.19223	0.24331	0.782826
ARMCX5	-0.226784	4.72168	-1.98549	0.0515167	0.791925	-0.126278	4.72168	-1.08182	0.283523	0.796883
TAF1B	0.326472	4.09101	1.98475	0.0516108	0.791925	0.126895	4.09101	1.08964	0.280181	0.796883
AC245297.3	0.452815	2.21526	2.00712	0.0509598	0.791925	-0.252141	2.21526	-1.01551	0.314413	0.807954
IQUB	-0.835245	1.14961	-1.99733	0.0509989	0.791925	0.274508	1.14961	1.02767	0.318071	0.809684
PCBD1	-0.29259	5.57738	-1.99347	0.0515985	0.791925	0.165041	5.57738	0.996271	0.323174	0.809684
ZNF410	0.519236	1.54513	1.98674	0.0513891	0.791925	0.186069	1.54513	0.984633	0.32917	0.810775
UBE3D	0.371977	2.69165	2.00034	0.0512385	0.791925	0.182531	2.69165	0.95845	0.342309	0.813418
ITIH5	-1.75535	1.01333	-1.99551	0.0509661	0.791925	-0.451241	1.01333	-0.968809	0.355518	0.818896
FAM181A-AS1	-1.27942	-1.59188	-1.99206	0.0508353	0.791925	-0.35272	-1.59188	-0.893586	0.377946	0.826744
ATP6V0D1	-0.248585	8.33579	-1.99796	0.0509058	0.791925	-0.0969994	8.33579	-0.80018	0.427152	0.850859
HLA-C	-0.790974	5.25311	-1.99459	0.0511162	0.791925	-0.196998	5.25311	-0.769706	0.450191	0.858453
AC026356.1	0.691011	0.600469	1.98718	0.0516973	0.791925	-0.223791	0.600469	-0.723926	0.47224	0.865939
QSER1	0.270636	5.10949	2.02355	0.051207	0.791925	0.0876249	5.10949	0.671296	0.506901	0.877987
PPIAP31	-0.368855	3.74528	-1.9922	0.0516025	0.791925	-0.127215	3.74528	-0.60538	0.547195	0.889852
CNTN6	-1.50345	-0.872034	-2.10438	0.0511605	0.791925	-0.5577	-0.872034	-0.56725	0.573533	0.897587
NISCH	-0.249182	7.53279	-1.98407	0.0516788	0.791925	-0.0670908	7.53279	-0.561944	0.57618	0.897587
NOP14-AS1	-0.243863	4.49668	-1.99135	0.0509022	0.791925	0.0541189	4.49668	0.510644	0.611458	0.909003
SCN1A-AS1	0.803098	0.150573	2.01548	0.0497896	0.791925	-0.204944	0.150573	-0.475768	0.636149	0.915918
GAS2L1	-0.901305	2.75726	-1.9889	0.0511936	0.791925	-0.0796593	2.75726	-0.466605	0.645964	0.918591
ZSCAN18	-0.274992	5.81515	-2.01708	0.0515046	0.791925	-0.0545322	5.81515	-0.464986	0.646393	0.918765
BX322234.1	-1.03331	-0.511154	-2.00049	0.0498521	0.791925	0.136478	-0.511154	0.408478	0.684915	0.928324
OGFOD2	0.928284	-0.363285	1.99478	0.050482	0.791925	-0.105738	-0.363285	-0.334309	0.739322	0.943492
AC078845.1	0.876439	1.59208	2.17043	0.0511722	0.791925	-0.226627	1.59208	-0.291436	0.771762	0.951897
U2AF1	-1.57738	-0.159801	-1.99297	0.0506807	0.791925	0.143869	-0.159801	0.289656	0.773502	0.951897
EIF4A1P2	-0.518646	1.68853	-1.99426	0.0509212	0.791925	0.0691196	1.68853	0.258057	0.797239	0.955937
PCDHA7	1.39886	0.535642	2.00999	0.0510478	0.791925	0.140737	0.535642	0.169142	0.866301	0.97083
TGIF2	-1.21836	1.96619	-1.99705	0.0502144	0.791925	0.0173271	1.96619	0.122552	0.902858	0.980283
DHDH	-0.833128	0.21965	-2.01234	0.0510542	0.791925	-0.024219	0.21965	-0.0573265	0.95455	0.989114
SNRPE	0.298214	6.85281	2.00085	0.05	0.791925	0.000722588	6.85281	0.00521828	0.995854	0.999069
RFPL2	-1.62916	0.489303	-2.0538	0.0513806	0.791925	-0.00186843	0.489303	-0.00240873	0.9981	0.9996
ZNF121	0.22352	5.63242	2.0029	0.0517707	0.792298	0.220443	5.63242	2.13037	0.040031	0.74447
EFCAB2	0.495971	4.39411	2.00013	0.0518464	0.792706	0.0731147	4.39411	0.294752	0.769546	0.95125
TCP11L1	0.305293	4.33051	1.9993	0.0519152	0.793008	-0.286971	4.33051	-1.62433	0.109958	0.74447
PSTPIP2	0.738803	1.98408	1.98129	0.0519977	0.793211	-0.0610657	1.98408	-0.26374	0.792855	0.954778
CCDC144NL	-1.40939	-0.438139	-1.98193	0.0520267	0.793211	-0.043421	-0.438139	-0.0933479	0.926138	0.984608
FAM66B	0.775047	1.12264	2.03487	0.0522605	0.796024	-0.0926541	1.12264	-0.211379	0.833691	0.963065
GANAB	-0.206427	8.37013	-1.98773	0.0524694	0.796242	-0.0997145	8.37013	-1.03348	0.306877	0.804446
MFGE8	-0.983119	2.13513	-1.97849	0.0525211	0.796242	0.141751	2.13513	0.84404	0.405537	0.843328
AL512625.2	-0.549491	1.57073	-2.00968	0.0524814	0.796242	-0.207509	1.57073	-0.651671	0.517669	0.880586
ABR	-0.305555	6.31109	-1.97852	0.052401	0.796242	-0.0794577	6.31109	-0.632233	0.529775	0.886575
AC016739.1	-0.464006	3.43433	-1.97763	0.05242	0.796242	0.162594	3.43433	0.611159	0.543329	0.889441
CATSPERG	-0.572547	1.26326	-1.97848	0.0526493	0.797437	0.376477	1.26326	1.25643	0.213742	0.766649
CCDC144NL-AS1	-0.82464	4.74949	-1.97403	0.0528408	0.798091	-0.257706	4.74949	-1.06223	0.293746	0.798861
DGCR6L	-0.298069	6.16005	-1.99934	0.0528629	0.798091	-0.0776289	6.16005	-0.536568	0.594867	0.902096
ABL2	0.377087	4.49988	1.98596	0.05289	0.798091	-0.0729713	4.49988	-0.373234	0.710512	0.936426
NOL11	0.149881	6.4046	1.97552	0.0528205	0.798091	-0.0133643	6.4046	-0.180633	0.857253	0.967977
SDCBPP3	-0.547071	1.19641	-1.97287	0.0530178	0.799274	0.102735	1.19641	0.501284	0.618241	0.909632
MAP3K19	-2.01901	-0.414659	-1.97614	0.0531611	0.800253	1.07359	-0.414659	1.72708	0.101924	0.74447
ABCC10	-0.318843	5.05774	-1.9715	0.0531818	0.800253	0.0230658	5.05774	0.160042	0.873374	0.972267
KANSL2	-0.172499	6.55631	-1.97126	0.0532767	0.800934	-0.0790669	6.55631	-0.909	0.366886	0.823919
SERTAD2	0.364619	3.89464	1.97005	0.053398	0.802011	-0.186382	3.89464	-1.10805	0.272235	0.796883
SOCS4	0.309141	6.21729	2.00076	0.0534672	0.802306	0.134882	6.21729	0.805237	0.425185	0.849672
AC007969.1	-0.386519	4.26244	-1.96813	0.053529	0.802488	0.0370897	4.26244	0.184356	0.854336	0.967203
UCK1	-0.218637	5.61264	-1.97593	0.0536677	0.803822	-0.0230532	5.61264	-0.241879	0.810106	0.95866
BRINP1	0.641292	5.20488	1.99653	0.0538222	0.80539	-0.0871823	5.20488	-0.279196	0.781822	0.95245
AC004453.1	-0.435885	2.58631	-1.96482	0.0539199	0.805519	0.208963	2.58631	0.782369	0.436976	0.855318
ZNF354A	0.270781	4.06142	1.97554	0.0539306	0.805519	-0.0830097	4.06142	-0.644523	0.522455	0.882077
ZNF212	-0.325656	4.04455	-1.98289	0.0540003	0.805816	0.333969	4.04455	2.26892	0.0298872	0.74447
ZNF808	0.340742	3.95853	1.96602	0.0541696	0.807597	0.209048	3.95853	1.36486	0.178054	0.755938
MTREX	0.170937	6.38907	1.9623	0.0543065	0.808891	-0.00966141	6.38907	-0.113169	0.910263	0.981779
LINC02134	-1.52877	-0.729645	-1.96088	0.0543895	0.809381	-0.00151599	-0.729645	-0.00290168	0.997694	0.999555
IFT81	0.203488	5.88366	1.97284	0.0549038	0.810372	0.140106	5.88366	1.60873	0.11825	0.74447
LINC00685	0.807223	0.00330001	1.95774	0.0550398	0.810372	0.51607	0.00330001	1.58291	0.12016	0.74447
DNAAF4	0.717286	-0.197111	1.9515	0.0555186	0.810372	0.315531	-0.197111	1.24132	0.219162	0.768545
PTPRZ1	-0.551068	6.48698	-1.95094	0.0556595	0.810372	0.196081	6.48698	1.23568	0.227804	0.771888
SEMA5B	-0.663164	5.08989	-1.95718	0.0551205	0.810372	0.239126	5.08989	1.21786	0.238025	0.77828
AC074117.1	0.362792	2.86025	1.98002	0.0555889	0.810372	0.234204	2.86025	1.09327	0.279542	0.796883
C3orf18	-0.24609	4.96259	-1.95764	0.0555467	0.810372	0.128029	4.96259	1.0162	0.31392	0.807507
TLX1	0.658455	0.596036	2.03575	0.0547974	0.810372	-0.865224	0.596036	-1.0058	0.318501	0.809684
TSSC4	-0.174837	5.51189	-1.9508	0.0556037	0.810372	0.0877441	5.51189	0.990754	0.325657	0.809684
AL359263.1	-0.468822	1.10602	-1.95436	0.0551723	0.810372	0.259711	1.10602	0.957327	0.342121	0.813418
STON2	-0.399048	5.25997	-1.96532	0.055431	0.810372	0.161822	5.25997	0.955935	0.346373	0.815476
NRSN2	-0.210034	7.05753	-1.96595	0.0550602	0.810372	-0.0898875	7.05753	-0.887486	0.379408	0.827255
HSCB	-0.38126	2.78739	-1.97374	0.0546931	0.810372	0.0911142	2.78739	0.626318	0.537854	0.888053
FLOT2	-0.190713	7.79913	-1.97976	0.0548366	0.810372	-0.0483416	7.79913	-0.524977	0.602806	0.904791
DEDD	0.215706	5.27046	1.9945	0.0554327	0.810372	-0.0503903	5.27046	-0.477875	0.636461	0.915918
NUDT16L1	-0.24538	6.55122	-1.9627	0.0546395	0.810372	0.0546014	6.55122	0.44833	0.655593	0.921371
ZNF773	0.239743	3.80392	1.95495	0.055465	0.810372	-0.0429609	3.80392	-0.37217	0.711135	0.936549
ADAMTS9-AS2	-1.39861	-0.215045	-1.9512	0.0556334	0.810372	0.109416	-0.215045	0.336605	0.738177	0.943334
AKR1C3	-0.906222	0.736853	-1.95111	0.0555706	0.810372	-0.0909143	0.736853	-0.323524	0.747869	0.945422
GLCE	0.448357	5.02109	2.01135	0.0556057	0.810372	0.0402115	5.02109	0.168639	0.867199	0.970929
ZFP69B	0.547883	3.54535	2.05868	0.0546311	0.810372	0.0438536	3.54535	0.149343	0.882481	0.974647
GNL1	-0.186626	6.61626	-1.95621	0.0552037	0.810372	0.0101489	6.61626	0.118512	0.906079	0.980714
BAIAP2	-0.327805	5.53093	-1.95821	0.0548363	0.810372	0.00858609	5.53093	0.0616933	0.951027	0.988856
RUBCNL	-0.894262	0.393936	-1.97557	0.0546375	0.810372	-0.0177833	0.393936	-0.0469023	0.96292	0.991889
UBE2D3	0.160938	9.23903	1.95103	0.0557271	0.810447	-0.0517484	9.23903	-0.637998	0.525845	0.883512
MEPCE	-0.379824	3.46003	-1.94966	0.0557649	0.810447	0.00760647	3.46003	0.0540063	0.957132	0.989585
SEC16A	0.388402	5.17792	1.94864	0.0558678	0.810916	0.103898	5.17792	0.757755	0.451825	0.85895
GSTO1	-0.422932	5.74369	-1.96593	0.0559512	0.810916	-0.152227	5.74369	-0.751634	0.456883	0.861072
AC009506.1	-0.6971	0.324263	-1.9493	0.0559136	0.810916	0.153203	0.324263	0.542621	0.589662	0.901109
OCLN	-1.04965	3.0571	-1.97089	0.0559979	0.810916	-0.123387	3.0571	-0.312803	0.758647	0.949248
VDAC1P1	-0.330248	3.05037	-1.94706	0.0560607	0.811099	-0.0496209	3.05037	-0.274931	0.784283	0.95245
HMGB1P5	-0.260124	4.63339	-1.94555	0.0562456	0.811594	-0.0762009	4.63339	-0.706151	0.482739	0.869544
NSUN7	-0.916992	0.820875	-1.94717	0.0562439	0.811594	0.0695056	0.820875	0.330195	0.742499	0.944407
PRC1	0.784828	0.733378	1.94577	0.0562198	0.811594	0.0355521	0.733378	0.171099	0.865327	0.970697
ATG4A	0.244268	4.2915	1.91195	0.0612981	0.81217	-0.332266	4.2915	-2.5133	0.0147893	0.74447
ATP2B4	-0.72846	5.03618	-1.92974	0.0582445	0.81217	0.397422	5.03618	1.97008	0.0548627	0.74447
C6orf47	0.20508	4.33524	1.93557	0.0574834	0.81217	0.256533	4.33524	2.38067	0.0203679	0.74447
CDKN2C	-1.11434	1.63325	-1.9168	0.0598754	0.81217	-0.52752	1.63325	-1.81845	0.0802851	0.74447
DCUN1D5	0.165932	6.03615	1.93838	0.057591	0.81217	-0.14657	6.03615	-1.67407	0.0993635	0.74447
FAM86C1	-0.545138	1.76304	-1.94652	0.0565797	0.81217	-0.352751	1.76304	-1.67366	0.102518	0.74447
HENMT1	0.330956	2.11818	1.96086	0.0615569	0.81217	-1.05136	2.11818	-2.1339	0.037004	0.74447
KIAA0355	-0.334996	4.59648	-1.93431	0.0610796	0.81217	0.279735	4.59648	1.63462	0.110924	0.74447
SLC35A2	-0.225494	5.82641	-1.94209	0.058071	0.81217	-0.232016	5.82641	-2.0954	0.0416869	0.74447
SLTM	0.281021	4.98383	1.92756	0.0599248	0.81217	0.2897	4.98383	2.61491	0.0149495	0.74447
STX11	-1.46997	-0.490839	-1.92793	0.0584558	0.81217	-0.989506	-0.490839	-2.07989	0.0436059	0.74447
TNRC6A	0.316967	4.22268	1.93194	0.0590018	0.81217	0.237121	4.22268	1.92239	0.0650422	0.74447
TSPO	-0.879485	2.78737	-1.9413	0.0568174	0.81217	0.343045	2.78737	1.87239	0.0742227	0.74447
ZBED5	0.21107	6.43098	1.96776	0.0583263	0.81217	0.248528	6.43098	2.36441	0.0249193	0.74447
AC026273.1	0.487005	0.668006	1.99004	0.0594802	0.81217	0.840424	0.668006	1.52895	0.131384	0.746138
SLC2A1-AS1	-1.05493	-0.763597	-1.91932	0.0595487	0.81217	0.56207	-0.763597	1.51947	0.133727	0.746771
TMEM8B	-0.227219	4.79425	-1.92003	0.0598118	0.81217	0.162085	4.79425	1.52197	0.133723	0.746771
ARID4B	0.279584	5.73279	1.94815	0.0589052	0.81217	0.188287	5.73279	1.52631	0.139378	0.749732
LINC02245	-0.434879	1.45527	-1.92448	0.058966	0.81217	0.348508	1.45527	1.50782	0.13668	0.749732
AC018413.1	0.607105	-0.350399	1.91103	0.0609014	0.81217	0.521073	-0.350399	1.42476	0.159242	0.752666
RAP1GDS1	0.183985	7.39774	1.94803	0.0594358	0.81217	-0.139315	7.39774	-1.43941	0.15812	0.752666
LOH12CR2	0.430973	1.89281	1.91354	0.0603777	0.81217	0.282558	1.89281	1.4026	0.165834	0.753298
ESYT1	-0.285419	6.63594	-1.97274	0.0565749	0.81217	-0.195027	6.63594	-1.40683	0.169213	0.754818
ELOVL2	0.37744	5.47925	1.95208	0.057253	0.81217	-0.245351	5.47925	-1.38933	0.172803	0.755544
KHDC4	0.287974	3.82085	1.902	0.0619675	0.81217	0.151763	3.82085	1.38056	0.174266	0.755544
ZNF525	0.405878	2.77208	1.91711	0.0616424	0.81217	0.25054	2.77208	1.39097	0.173895	0.755544
GLG1	-0.176664	8.76773	-1.9047	0.0615656	0.81217	0.114935	8.76773	1.36347	0.1778	0.755938
ACADS	-0.507694	3.22202	-1.97084	0.0564239	0.81217	0.328025	3.22202	1.34751	0.187156	0.758619
WSCD2	-0.72535	3.41114	-1.9198	0.0615968	0.81217	-0.546768	3.41114	-1.32886	0.189575	0.760424
PACSIN3	-1.21706	0.216521	-1.94327	0.0569596	0.81217	0.207249	0.216521	1.29989	0.199171	0.762421
AL590867.2	-0.387026	3.24268	-1.90269	0.061728	0.81217	0.253216	3.24268	1.24851	0.216538	0.768545
PPFIBP2	-0.873445	1.44496	-1.93362	0.0599005	0.81217	-0.508441	1.44496	-1.25199	0.219148	0.768545
ZCCHC2	0.396564	2.06436	1.92088	0.0601937	0.81217	0.229353	2.06436	1.18138	0.24295	0.782425
SRSF5	-0.291735	7.6671	-1.95745	0.0575641	0.81217	0.159665	7.6671	1.16735	0.2517	0.786337
TMEM100	-1.18182	3.66029	-1.97263	0.0602111	0.81217	-0.68272	3.66029	-1.14938	0.261908	0.791528
FAM117B	0.426103	5.31426	1.95387	0.0614157	0.81217	0.253891	5.31426	1.13969	0.263802	0.792607
TUBA4A	-0.720549	4.72148	-2.08255	0.0583111	0.81217	-0.465476	4.72148	-1.14567	0.263963	0.792607
RANBP9	0.161846	5.46453	1.91034	0.0615866	0.81217	-0.101603	5.46453	-1.06689	0.290304	0.798861
SNHG29	0.211506	6.67457	1.91515	0.0621388	0.81217	0.122368	6.67457	1.05771	0.295397	0.798861
TLCD2	-1.1528	0.00494541	-1.91182	0.060649	0.81217	0.269976	0.00494541	1.02017	0.312949	0.807507
BABAM2	-0.216543	5.54404	-1.94904	0.0585344	0.81217	0.0983028	5.54404	1.00644	0.322684	0.809684
NARS2	-0.273948	5.32747	-1.93828	0.0606135	0.81217	0.146196	5.32747	1.00339	0.321788	0.809684
POLR2L	-0.342071	6.35152	-1.93229	0.0603048	0.81217	-0.169408	6.35152	-1.00464	0.321453	0.809684
PPP1R1C	0.356606	4.14611	1.97096	0.0610356	0.81217	0.398166	4.14611	0.974585	0.333573	0.811361
FAM161A	0.275729	4.51518	1.95116	0.0571736	0.81217	0.118187	4.51518	0.930459	0.357955	0.820241
BEAN1	0.690397	0.668971	1.93009	0.0593443	0.81217	-0.311613	0.668971	-0.912646	0.365976	0.823886
NPR2	-0.419765	2.52725	-1.91247	0.0609653	0.81217	-0.191681	2.52725	-0.91129	0.36601	0.823886
VPS16	-0.171531	6.18516	-1.92377	0.0603818	0.81217	-0.0766706	6.18516	-0.905851	0.369794	0.824761
AC006970.1	-0.853742	-2.01668	-1.90951	0.0608747	0.81217	-0.242309	-2.01668	-0.882505	0.383385	0.830103
SLC25A11	-0.23863	6.93505	-1.94997	0.0591036	0.81217	-0.104619	6.93505	-0.876332	0.38693	0.832992
BSCL2	0.357509	2.38043	1.93196	0.0596587	0.81217	0.143434	2.38043	0.873206	0.388313	0.833514
ZNF644	0.176157	7.00431	1.93907	0.0621653	0.81217	0.07598	7.00431	0.8696	0.392287	0.836819
AC007114.1	-0.749408	-0.158751	-1.9204	0.0594384	0.81217	0.227828	-0.158751	0.825507	0.412866	0.844929
IREB2	0.191183	6.5693	1.91141	0.0615871	0.81217	0.0836199	6.5693	0.818539	0.4166	0.845893
BRAF	0.278115	4.49167	1.9023	0.0619558	0.81217	0.111542	4.49167	0.732218	0.466801	0.86451
DPH3	0.154383	6.95814	1.92117	0.0596398	0.81217	-0.0597014	6.95814	-0.728315	0.469231	0.86501
ARMC9	-0.225399	5.29123	-1.93594	0.0577139	0.81217	0.0703891	5.29123	0.725131	0.471642	0.865641
BIRC2	0.182896	7.13921	1.90036	0.062038	0.81217	-0.0659957	7.13921	-0.718377	0.475224	0.867113
GNPAT	0.209708	7.07187	1.9029	0.061799	0.81217	-0.0744089	7.07187	-0.706637	0.482462	0.869534
RSL24D1	0.229164	6.89253	1.94771	0.0572277	0.81217	0.0793708	6.89253	0.685248	0.496345	0.874176
DZIP1L	-0.899004	0.596096	-1.9252	0.058853	0.81217	0.154759	0.596096	0.683876	0.497797	0.874683
QPCT	-0.710883	4.98304	-1.94958	0.0595192	0.81217	-0.277508	4.98304	-0.676962	0.501838	0.876874
ENGASE	-0.36427	3.53146	-1.92506	0.0588124	0.81217	0.10173	3.53146	0.628941	0.531698	0.886575
FAM3A	-0.266016	5.02024	-1.94669	0.0590615	0.81217	-0.0790534	5.02024	-0.629163	0.533817	0.887288
ZNF18	0.276064	4.19034	1.92861	0.0585112	0.81217	-0.070402	4.19034	-0.626735	0.533612	0.887288
AC105942.1	-0.273274	4.4806	-1.94672	0.0588447	0.81217	-0.0789521	4.4806	-0.622611	0.538117	0.888124
HMGN2P5	-0.389471	2.88242	-1.9132	0.060434	0.81217	-0.102625	2.88242	-0.614505	0.541332	0.889033
DRAP1	-0.296775	6.03999	-1.9474	0.0571175	0.81217	-0.0925473	6.03999	-0.613404	0.542305	0.889441
DXO	0.343025	3.94864	1.92263	0.0605199	0.81217	-0.0804389	3.94864	-0.580516	0.566376	0.897548
SSPN	-0.877242	1.76191	-1.90814	0.0614824	0.81217	0.0620808	1.76191	0.564318	0.574903	0.897587
SRFBP1	0.246058	3.98801	1.92135	0.0593211	0.81217	0.0617666	3.98801	0.555152	0.580823	0.897845
CCSER2	0.184454	7.02114	1.92257	0.0594041	0.81217	-0.0505479	7.02114	-0.54235	0.589595	0.901109
PODNL1	-0.895163	0.984257	-1.92416	0.0612397	0.81217	-0.211652	0.984257	-0.532029	0.59883	0.903698
AKNA	-0.90225	1.12417	-1.90213	0.0619051	0.81217	0.12283	1.12417	0.516438	0.607888	0.907066
LRRC37A3	-0.486549	2.67337	-1.91741	0.0597957	0.81217	0.0865597	2.67337	0.50503	0.615328	0.909159
ALOX12-AS1	0.436051	2.55144	1.9277	0.0590129	0.81217	0.0919944	2.55144	0.502416	0.617948	0.909569
POTEI	-0.522254	2.7539	-1.90337	0.0618841	0.81217	-0.137064	2.7539	-0.498325	0.620043	0.910376
CTBP2P4	-0.658311	0.169023	-1.9119	0.060588	0.81217	0.15414	0.169023	0.497252	0.620802	0.910917
PIM2	-0.231578	4.55706	-1.91886	0.0613316	0.81217	0.0573946	4.55706	0.48769	0.628117	0.913572
ABCF3	-0.231066	5.86874	-1.93274	0.0592258	0.81217	-0.0491403	5.86874	-0.452435	0.653304	0.920703
UNC119B	-0.441504	4.7346	-1.95129	0.0586442	0.81217	0.0763424	4.7346	0.437417	0.667365	0.924001
ADCYAP1	0.719154	4.36489	2.01893	0.0569034	0.81217	-0.203921	4.36489	-0.415003	0.679996	0.927771
CAPG	-1.51352	0.847732	-1.91979	0.0596951	0.81217	-0.119939	0.847732	-0.405723	0.687165	0.929033
CYP7B1	-0.413126	2.7214	-1.90527	0.0613845	0.81217	0.0660484	2.7214	0.383674	0.702546	0.934012
STAT3	-0.233441	8.22102	-1.95143	0.0581524	0.81217	-0.0407384	8.22102	-0.378083	0.707939	0.935655
ZNF124	0.508393	3.6425	2.0449	0.0600914	0.81217	0.105474	3.6425	0.368533	0.715806	0.938318
LMOD1	-1.55247	-0.994899	-1.94357	0.056521	0.81217	-0.167626	-0.994899	-0.355095	0.724742	0.940064
PRLHR	-1.83018	-0.610089	-2.08629	0.0589466	0.81217	0.441987	-0.610089	0.341379	0.734532	0.942131
ZNF256	0.340323	2.81917	1.93158	0.0579851	0.81217	0.0504356	2.81917	0.339775	0.735174	0.942131
ZNF285	0.414813	4.10446	1.96413	0.058017	0.81217	-0.0762792	4.10446	-0.316565	0.753005	0.947192
BTG3-AS1	-1.25381	-0.0957412	-1.9202	0.0594358	0.81217	0.0822479	-0.0957412	0.272375	0.786238	0.953109
NDUFB10	-0.229542	7.06397	-1.94709	0.0566129	0.81217	0.0309078	7.06397	0.265353	0.791693	0.954778
G2E3	0.216915	5.69537	1.90681	0.0621363	0.81217	0.0263519	5.69537	0.242869	0.809086	0.95808
RND1	-0.437634	3.10755	-1.90268	0.0618057	0.81217	0.0312472	3.10755	0.243543	0.809648	0.958377
DHX35	-0.258841	4.17197	-1.92044	0.059718	0.81217	0.0259964	4.17197	0.22101	0.825916	0.961431
IRF2BP2	0.463903	5.0167	1.93581	0.0574889	0.81217	0.0394132	5.0167	0.216104	0.829695	0.962646
AC069547.1	0.869391	-0.101457	1.94421	0.0564258	0.81217	0.0818274	-0.101457	0.19812	0.843599	0.966223
ATP5F1EP2	-0.652662	0.804969	-1.94071	0.0568439	0.81217	0.0732761	0.804969	0.193742	0.847011	0.966697
ZNF225	-0.280511	4.05907	-1.90935	0.0620261	0.81217	0.0239488	4.05907	0.187262	0.852396	0.967203
ZFP1	0.247858	6.38152	1.95512	0.061003	0.81217	0.0209196	6.38152	0.166514	0.869004	0.971397
STK16	-0.245674	4.2648	-1.90751	0.0615848	0.81217	-0.0171313	4.2648	-0.160951	0.872838	0.972267
NBEAL1	0.313671	3.83753	1.93243	0.057937	0.81217	0.0206066	3.83753	0.149472	0.881685	0.974418
YWHAQP6	-0.595129	0.761067	-1.9357	0.0583585	0.81217	-0.0427949	0.761067	-0.123133	0.902412	0.980099
MRPL10	-0.15948	5.94043	-1.91961	0.0595888	0.81217	-0.00974446	5.94043	-0.118796	0.905822	0.980639
PRR3	0.178647	5.12902	1.92888	0.0585411	0.81217	0.00979521	5.12902	0.107187	0.914992	0.981981
PHYKPL	-0.331297	4.146	-1.92871	0.0587076	0.81217	-0.0110137	4.146	-0.0986826	0.922132	0.98358
HSPA8P1	-0.381785	3.057	-1.94082	0.0572577	0.81217	0.0211751	3.057	0.0866621	0.93122	0.984857
NSL1	0.213613	5.97831	1.93252	0.0578846	0.81217	0.0071356	5.97831	0.0743878	0.940943	0.985854
C9orf78	-0.184409	5.89899	-1.92878	0.0584088	0.81217	0.00605858	5.89899	0.0709253	0.94369	0.986416
MOB2	-0.258278	3.94182	-1.93677	0.0579211	0.81217	-0.0073462	3.94182	-0.0634485	0.949673	0.988513
VPS28	-0.342579	6.84637	-1.95587	0.0573771	0.81217	-0.0098401	6.84637	-0.0579743	0.954063	0.989114
DESI2	0.210355	5.87666	1.9336	0.0577313	0.81217	0.00572941	5.87666	0.0556762	0.955779	0.989452
EIF2S3B	-0.497134	0.308075	-1.91509	0.0600971	0.81217	0.0128757	0.308075	0.0411795	0.967285	0.992568
RAPGEF6	0.522385	3.08777	2.00195	0.0600404	0.81217	0.00856847	3.08777	0.0303606	0.976022	0.994291
P2RX4	-0.362572	3.44211	-1.91655	0.0609814	0.81217	0.00412628	3.44211	0.0295005	0.976691	0.994307
PAICS	0.227723	7.12568	1.91347	0.0620315	0.81217	0.00192501	7.12568	0.0186529	0.985226	0.99594
ZNF587	0.353741	3.65065	1.90824	0.061386	0.81217	-0.000515601	3.65065	-0.0034831	0.997236	0.999339
MRPS6	0.231507	5.83734	1.90552	0.062216	0.812174	0.0216969	5.83734	0.196897	0.844742	0.966629
ATXN7L1	0.307969	3.13382	1.9113	0.0626358	0.813475	0.267001	3.13382	1.886	0.0681467	0.74447
CRLF1	0.978615	0.471945	1.90286	0.0634258	0.813475	1.03937	0.471945	2.16877	0.0359563	0.74447
IPO13	-0.195245	6.07031	-1.89335	0.0632188	0.813475	0.16224	6.07031	1.73305	0.0884012	0.74447
SRPX2	-1.81304	0.925572	-1.89172	0.0633627	0.813475	-0.79476	0.925572	-1.71783	0.1121	0.74447
LUC7L2	0.149841	4.96718	1.89685	0.0625426	0.813475	0.0968079	4.96718	1.50393	0.137909	0.749732
NNAT	-1.72872	8.10845	-1.96826	0.0634448	0.813475	-1.15843	8.10845	-1.25681	0.221288	0.768545
RNF141	-0.244731	6.69316	-1.90507	0.0633534	0.813475	0.142597	6.69316	1.19566	0.239056	0.779378
ABHD18	0.250653	3.84099	1.89232	0.0631722	0.813475	0.125729	3.84099	1.14945	0.255012	0.787568
COPS6	-0.201496	7.70561	-1.89697	0.0631913	0.813475	-0.0996898	7.70561	-0.969425	0.336609	0.812134
RPL13AP20	-0.567515	0.92065	-1.8948	0.0627839	0.813475	0.269945	0.92065	0.893834	0.374867	0.824821
ZNF701	0.359718	3.65653	1.89271	0.0634733	0.813475	0.12413	3.65653	0.798977	0.428352	0.851045
MFSD14A	-0.325772	3.05255	-1.90544	0.0628806	0.813475	-0.123069	3.05255	-0.711964	0.479774	0.867929
AL049840.4	-1.21916	0.216247	-1.89214	0.0632836	0.813475	-0.181638	0.216247	-0.653205	0.51719	0.880586
APEH	-0.294454	7.40002	-1.94181	0.0631443	0.813475	-0.0923576	7.40002	-0.642534	0.527155	0.884577
AC007285.1	0.650998	0.530382	1.89109	0.0632867	0.813475	-0.203394	0.530382	-0.626032	0.533592	0.887288
RPL36	-0.254366	7.035	-1.89644	0.0626275	0.813475	0.0642474	7.035	0.495875	0.621739	0.911513
USP42	0.404415	4.79622	1.89769	0.0630442	0.813475	0.0854231	4.79622	0.473724	0.637998	0.916002
AVPI1	-0.408514	3.87905	-1.91625	0.0627852	0.813475	-0.0697001	3.87905	-0.394166	0.697057	0.931774
GALR1	-1.87147	-0.318762	-1.90619	0.0626097	0.813475	-0.4156	-0.318762	-0.384822	0.701817	0.933562
UBE2D1	0.299985	6.7991	1.90107	0.0633996	0.813475	0.0432317	6.7991	0.274442	0.78488	0.952653
TIAM2	-0.328627	3.35919	-1.89933	0.0624584	0.813475	-0.0361794	3.35919	-0.193912	0.84688	0.966697
ZFYVE27	-0.211736	6.23238	-1.89299	0.0632749	0.813475	0.0133663	6.23238	0.11762	0.906753	0.980714
HAGHL	-0.354596	2.89876	-1.92632	0.063352	0.813475	0.0153067	2.89876	0.0861679	0.931937	0.984857
CPT1C	-0.239034	6.68306	-1.88958	0.063633	0.813592	0.0492033	6.68306	0.399718	0.690752	0.929468
ABCB11	-1.46579	-1.24336	-1.88892	0.0636335	0.813592	-0.131589	-1.24336	-0.28834	0.774178	0.951897
VAMP4	0.30063	5.45737	1.91336	0.0635715	0.813592	0.00364123	5.45737	0.0240209	0.980974	0.995451
XKR9	0.958307	0.409932	1.88868	0.0637394	0.814303	0.107659	0.409932	0.27145	0.787122	0.953361
AKAP3	-0.657558	2.04533	-1.81558	0.074273	0.81675	0.512236	2.04533	1.93647	0.0576583	0.74447
AL096803.2	0.672324	0.582146	1.85964	0.0685957	0.81675	0.865465	0.582146	2.67765	0.0102956	0.74447
AP003108.1	-0.878491	-0.320401	-1.91414	0.0647984	0.81675	0.989339	-0.320401	1.7249	0.0904388	0.74447
ARHGAP30	0.678709	0.812819	1.84019	0.0713115	0.81675	0.699798	0.812819	1.80342	0.0764991	0.74447
ARL17B	-0.918342	1.2792	-1.88617	0.0657574	0.81675	0.932198	1.2792	2.01782	0.0499361	0.74447
ATXN1	0.237042	4.91907	1.88506	0.0647966	0.81675	0.305017	4.91907	2.73634	0.00865557	0.74447
C16orf86	-0.79906	0.446669	-1.83901	0.070704	0.81675	0.593314	0.446669	2.67671	0.0095007	0.74447
C5orf34	0.498211	2.38741	1.79752	0.0772299	0.81675	-0.434593	2.38741	-2.20969	0.0323473	0.74447
CILP2	-0.943448	0.598489	-1.85188	0.0699414	0.81675	1.07588	0.598489	2.49626	0.0169924	0.74447
CKS1BP3	-0.789667	-0.16989	-1.87352	0.0657121	0.81675	-0.605286	-0.16989	-2.23922	0.0287388	0.74447
CYBC1	-0.164832	6.35697	-1.8598	0.0701694	0.81675	-0.150579	6.35697	-1.81293	0.0781505	0.74447
DDIT4L	-1.50704	-0.457697	-1.80337	0.0762082	0.81675	0.719392	-0.457697	2.01028	0.0561814	0.74447
DGCR2	-0.223372	7.7639	-1.80789	0.0757455	0.81675	-0.180349	7.7639	-1.57302	0.12111	0.74447
GPATCH3	-0.212522	3.77268	-1.83096	0.0728518	0.81675	0.200094	3.77268	1.73987	0.0875967	0.74447
GPRC5B	-0.381831	5.48219	-1.88333	0.0646332	0.81675	0.23138	5.48219	1.58596	0.12087	0.74447
GRIK2	-0.562032	4.76619	-1.84817	0.0724145	0.81675	0.498695	4.76619	1.6419	0.108627	0.74447
HNRNPA1P10	-0.367831	1.68292	-1.79752	0.0771678	0.81675	0.302674	1.68292	1.63466	0.107226	0.74447
ITGB8	-0.657271	5.382	-1.8162	0.0757814	0.81675	0.562592	5.382	2.50923	0.0284511	0.74447
KCNIP4	-0.663826	2.67681	-1.95756	0.0651528	0.81675	1.16174	2.67681	1.8587	0.0678363	0.74447
LRRFIP1	0.241872	5.38511	1.841	0.070655	0.81675	-0.197355	5.38511	-1.82992	0.0730563	0.74447
MAGED2	-0.173872	9.3378	-1.89369	0.0647388	0.81675	-0.144241	9.3378	-1.64492	0.107342	0.74447
PCDHAC1	-0.544623	2.77359	-1.82443	0.0766726	0.81675	0.576865	2.77359	1.68361	0.0987056	0.74447
PIMREG	-0.893966	3.04954	-1.85442	0.0684384	0.81675	-0.34714	3.04954	-1.73117	0.107536	0.74447
POLR3C	0.1942	6.03407	1.84396	0.0722866	0.81675	-0.179247	6.03407	-1.67002	0.101825	0.74447
PPARGC1B	-0.431597	0.876926	-1.83702	0.0710012	0.81675	-0.97893	0.876926	-1.60964	0.112557	0.74447
PPP1R1B	-1.39299	-0.10405	-1.84012	0.070603	0.81675	0.7064	-0.10405	2.30607	0.0295677	0.74447
RAMP1	-1.16877	2.75502	-1.8751	0.0690852	0.81675	1.21053	2.75502	1.99498	0.0540786	0.74447
RPRM	0.391926	4.06152	1.89272	0.074525	0.81675	-0.530292	4.06152	-1.72668	0.0902218	0.74447
RRM1	0.216251	7.28343	1.81592	0.0758199	0.81675	-0.290174	7.28343	-2.68782	0.010425	0.74447
SCN7A	-0.536731	3.41995	-1.96982	0.0672375	0.81675	-0.717319	3.41995	-1.71984	0.0916541	0.74447
SLC43A3	-0.665298	0.94332	-1.87014	0.0680411	0.81675	-0.54612	0.94332	-1.58701	0.119766	0.74447
SORL1	-0.511681	5.2387	-1.86701	0.066753	0.81675	-0.30205	5.2387	-1.75793	0.0881987	0.74447
SV2C	-1.00775	6.61234	-1.89159	0.0707704	0.81675	-0.827236	6.61234	-1.70756	0.105541	0.74447
SYNE2	0.325946	5.01605	1.85025	0.0692509	0.81675	0.214448	5.01605	1.84152	0.074618	0.74447
SYTL5	-1.36387	1.95191	-1.87447	0.0658854	0.81675	-0.816072	1.95191	-2.02659	0.0600886	0.74447
TMEM198B	-0.396759	4.43837	-1.88806	0.0659392	0.81675	0.480214	4.43837	2.82348	0.0092636	0.74447
TRMT1	-0.203598	4.83584	-1.84307	0.0700996	0.81675	-0.175217	4.83584	-1.71437	0.0914563	0.74447
TSTD3	0.414881	2.81079	1.86736	0.0696503	0.81675	0.354696	2.81079	1.80137	0.0824347	0.74447
TULP3	0.315676	4.7154	1.84674	0.0697038	0.81675	-0.213526	4.7154	-2.02645	0.0518675	0.74447
TXNP5	-0.535214	0.0762528	-1.81422	0.0744828	0.81675	-0.821248	0.0762528	-2.22743	0.0295579	0.74447
UBN2	0.387241	3.90747	1.82296	0.0742593	0.81675	0.382729	3.90747	1.85835	0.0689531	0.74447
UGDH	0.196226	6.43718	1.82094	0.0737283	0.81675	-0.277065	6.43718	-2.73155	0.00831431	0.74447
USF3	0.287787	3.81851	1.83431	0.0722531	0.81675	0.355236	3.81851	2.53554	0.0146173	0.74447
USP48	0.205801	5.7475	1.84393	0.0700769	0.81675	-0.26505	5.7475	-2.89984	0.00531544	0.74447
ZNF260	0.239924	6.47111	1.80444	0.0773237	0.81675	0.209919	6.47111	1.62024	0.11157	0.74447
ZNF490	0.367942	3.11717	1.81439	0.0759596	0.81675	0.484638	3.11717	2.43925	0.0184626	0.74447
ZSCAN16-AS1	-0.294246	3.71309	-1.88276	0.066905	0.81675	0.419648	3.71309	2.35474	0.0222716	0.74447
TAF2	0.147989	6.41309	1.84901	0.0696072	0.81675	-0.115335	6.41309	-1.53086	0.131301	0.746138
AC124944.2	0.686343	0.231738	1.82293	0.0731422	0.81675	0.399215	0.231738	1.5171	0.134555	0.74793
ABCC4	-0.42888	4.23576	-1.90432	0.0647841	0.81675	-0.309044	4.23576	-1.53815	0.135537	0.749253
NPEPPS	0.117633	7.5454	1.81571	0.075095	0.81675	0.0929139	7.5454	1.51677	0.135431	0.749253
MTO1	0.207612	4.89745	1.81251	0.0766924	0.81675	-0.158743	4.89745	-1.52455	0.135753	0.749725
AC008074.2	0.659616	0.0822876	1.81809	0.0740766	0.81675	0.549346	0.0822876	1.43295	0.156904	0.752666
AL445189.2	-0.569905	0.695483	-1.81015	0.0771077	0.81675	0.485367	0.695483	1.42837	0.159176	0.752666
B3GAT3	-0.192921	5.5031	-1.85406	0.0734557	0.81675	-0.143954	5.5031	-1.49917	0.146725	0.752666
BCO2	-0.574935	0.673922	-1.84468	0.0698621	0.81675	0.378969	0.673922	1.44925	0.152307	0.752666
MECP2	0.261091	4.64006	1.80218	0.0768932	0.81675	0.176575	4.64006	1.47077	0.148152	0.752666
TMEM186	0.210843	3.89312	1.88076	0.0650094	0.81675	0.152887	3.89312	1.45496	0.151042	0.752666
ZNF426-DT	0.54667	1.42803	1.8115	0.0761114	0.81675	0.409901	1.42803	1.45267	0.152956	0.752666
TECPR1	-0.317309	4.555	-1.87844	0.0670152	0.81675	-0.192954	4.555	-1.42996	0.165056	0.753298
TNFSF12	-0.896964	-0.929494	-1.80845	0.0753857	0.81675	0.428701	-0.929494	1.40318	0.165552	0.753298
AC011815.1	-0.681869	0.426969	-1.8793	0.0649048	0.81675	-0.478288	0.426969	-1.38945	0.169665	0.754818
RBM39	0.117792	7.49789	1.87117	0.0661438	0.81675	0.0783014	7.49789	1.37942	0.172865	0.755544
CLIC1	-0.481767	7.84897	-1.84082	0.0746984	0.81675	-0.346417	7.84897	-1.39033	0.174898	0.755555
CENPS	-0.569882	0.856439	-1.81439	0.0744929	0.81675	-0.306786	0.856439	-1.37405	0.175501	0.755938
PLEKHH2	-1.54467	0.850746	-1.86676	0.0671727	0.81675	-0.64422	0.850746	-1.41647	0.180996	0.755938
SHOC2	0.166126	7.3157	1.87245	0.0659476	0.81675	-0.120488	7.3157	-1.33784	0.185836	0.758619
KIAA2026	0.211193	4.60922	1.8218	0.0769854	0.81675	0.143354	4.60922	1.34554	0.189001	0.760424
WDR11	-0.300836	6.48693	-1.85552	0.0702599	0.81675	0.198694	6.48693	1.33583	0.189571	0.760424
TSPEAR-AS1	-1.80452	-0.350927	-1.85876	0.0689664	0.81675	-0.9943	-0.350927	-1.34251	0.19023	0.760902
NR2F2-AS1	-1.46197	-0.609097	-1.86939	0.0662933	0.81675	0.514091	-0.609097	1.30609	0.201298	0.762421
VAT1	-0.231603	8.7796	-1.83492	0.0739845	0.81675	-0.163446	8.7796	-1.3145	0.196175	0.762421
NR2F1-AS1	-0.768483	3.227	-1.80696	0.0758909	0.81675	0.207226	3.227	1.27796	0.20707	0.764527
RBM33	0.280838	4.82526	1.83212	0.0728556	0.81675	0.15736	4.82526	1.26929	0.212903	0.766649
ABCA1	-0.942562	3.11132	-1.87125	0.0661669	0.81675	0.336033	3.11132	1.29115	0.214562	0.767593
BCL9L	-0.81106	0.724168	-1.85347	0.0685742	0.81675	0.334673	0.724168	1.23904	0.220001	0.768545
CAPN10-DT	0.384718	2.17115	1.87632	0.06534	0.81675	0.203955	2.17115	1.23688	0.220993	0.768545
KIAA1586	0.234164	5.2781	1.89506	0.0647065	0.81675	0.153265	5.2781	1.23809	0.221974	0.769152
MXRA5	-1.89472	-0.0237551	-1.82825	0.0727761	0.81675	-0.743974	-0.0237551	-1.26807	0.224207	0.769628
RHEB	0.219145	7.73773	1.82577	0.0728864	0.81675	-0.145688	7.73773	-1.22658	0.224678	0.769628
ACP6	-0.776699	3.14478	-1.85353	0.0687206	0.81675	-0.268779	3.14478	-1.2351	0.234718	0.776356
TMEM63A	-1.37988	1.26035	-1.83588	0.0712803	0.81675	-0.300839	1.26035	-1.21061	0.244494	0.783828
EXOSC1	0.156597	5.19799	1.81097	0.0749911	0.81675	-0.104136	5.19799	-1.17021	0.246393	0.783935
CERS4	-0.334627	4.12873	-1.80455	0.0766917	0.81675	0.209807	4.12873	1.15398	0.253415	0.787568
AK4P1	-1.01991	-0.293937	-1.8695	0.0665874	0.81675	0.480535	-0.293937	1.13712	0.261378	0.791528
PDGFRB	-1.84182	2.00486	-1.81801	0.0745488	0.81675	-0.649328	2.00486	-1.18229	0.262405	0.791528
TYK2	-0.400437	4.6726	-1.82509	0.0762294	0.81675	-0.190113	4.6726	-1.16579	0.262832	0.79232
MCUB	-0.567271	4.41695	-1.81547	0.0744195	0.81675	-0.19677	4.41695	-1.13487	0.268962	0.795849
FAM45A	-0.148886	6.24904	-1.79787	0.077067	0.81675	-0.083649	6.24904	-1.10482	0.273507	0.796883
PKP2	-0.601229	1.87733	-1.86409	0.0680778	0.81675	0.397925	1.87733	1.09472	0.27808	0.796883
RADX	-0.536858	4.46169	-1.84021	0.0727878	0.81675	-0.375606	4.46169	-1.08581	0.282131	0.796883
SUGT1	0.178671	6.70333	1.83599	0.0718506	0.81675	0.106275	6.70333	1.0884	0.281018	0.796883
TSPAN6	-0.334592	6.47108	-1.84065	0.0728756	0.81675	0.157872	6.47108	1.10758	0.280321	0.796883
CACNG3	-1.33195	1.46386	-1.85677	0.0710706	0.81675	-0.940897	1.46386	-1.08096	0.284364	0.796961
XPNPEP1	-0.175271	7.14669	-1.84114	0.0710116	0.81675	-0.0994862	7.14669	-1.07735	0.285968	0.796961
AP000936.3	-0.534589	0.614348	-1.81352	0.0751803	0.81675	0.294541	0.614348	1.0619	0.292892	0.798861
SGF29	0.264455	3.64942	1.83174	0.0772237	0.81675	0.16667	3.64942	1.07898	0.287745	0.798861
DGLUCY	-0.289366	5.6282	-1.87222	0.0667177	0.81675	0.14641	5.6282	1.05289	0.297678	0.799959
RMND1	0.242323	5.33766	1.82496	0.0751453	0.81675	-0.133374	5.33766	-1.04904	0.300507	0.801444
C2orf69	0.256593	5.86742	1.86714	0.0717051	0.81675	0.147837	5.86742	1.03155	0.309396	0.80583
WDR18	-0.287052	5.90507	-1.82063	0.0736123	0.81675	0.15234	5.90507	1.01719	0.313054	0.807507
LINC01094	-1.19492	-0.838676	-1.85958	0.0677952	0.81675	0.301769	-0.838676	1.01468	0.315774	0.809183
COL17A1	-0.643383	0.0595756	-1.83264	0.0730777	0.81675	0.501397	0.0595756	1.00669	0.317996	0.809684
EEF1A1P11	-0.34574	4.66794	-1.86619	0.067139	0.81675	0.198257	4.66794	1.00061	0.320947	0.809684
LYST	0.445949	5.28791	1.97024	0.0664825	0.81675	0.239141	5.28791	1.01068	0.325002	0.809684
PUM3	0.296395	4.54205	1.85251	0.0689294	0.81675	-0.134424	4.54205	-0.995354	0.323989	0.809684
WDR75	0.150953	6.09221	1.85159	0.0689385	0.81675	-0.0765458	6.09221	-0.995508	0.323392	0.809684
GTSE1	-1.02942	1.25659	-1.83066	0.0720806	0.81675	-0.26363	1.25659	-1.02146	0.330011	0.811361
SNX19	-0.355395	6.52683	-1.86582	0.0725371	0.81675	0.175438	6.52683	0.987042	0.333892	0.811361
MTHFD2	0.430005	5.83177	1.87959	0.0666702	0.81675	-0.276617	5.83177	-0.965199	0.338339	0.812155
NUDT5	0.216256	5.77736	1.88726	0.0650912	0.81675	-0.0929075	5.77736	-0.969926	0.338718	0.812155
JMJD1C	0.303697	6.01423	1.80144	0.0773154	0.81675	0.139324	6.01423	0.964282	0.340205	0.81237
PMPCA	-0.205448	6.60545	-1.82306	0.0736014	0.81675	-0.101721	6.60545	-0.952648	0.34484	0.814356
CFAP43	-0.875149	2.61925	-1.82041	0.0762377	0.81675	0.317159	2.61925	0.984749	0.345667	0.814746
LRRC37A2	-0.647184	1.61437	-1.81998	0.0742557	0.81675	0.261831	1.61437	0.94626	0.350065	0.817859
TMEM98	-0.24789	5.82924	-1.82543	0.073378	0.81675	-0.0957023	5.82924	-0.947161	0.350311	0.817859
COMT	-0.274301	6.57211	-1.86532	0.0676975	0.81675	0.125	6.57211	0.939049	0.352382	0.818352
RPS2P55	-0.377907	1.71481	-1.82229	0.0732342	0.81675	0.217019	1.71481	0.933379	0.354245	0.818896
SNRPD2	-0.236149	7.51966	-1.8254	0.0730555	0.81675	-0.112756	7.51966	-0.912548	0.36519	0.8234
CPSF7	0.201865	4.81312	1.88311	0.0648987	0.81675	0.0771149	4.81312	0.896276	0.375134	0.824821
CD24	0.39038	9.21183	1.9053	0.0693441	0.81675	0.184915	9.21183	0.898315	0.378068	0.826898
ZNF84	0.292291	6.68918	1.91902	0.0644316	0.81675	0.130712	6.68918	0.890942	0.380605	0.827846
AL596244.1	0.65831	0.588375	1.85719	0.0692742	0.81675	0.32167	0.588375	0.873152	0.386361	0.832992
AZI2	0.180328	5.36109	1.88751	0.0646171	0.81675	0.07973	5.36109	0.871456	0.387478	0.833039
DOK1	-0.556751	2.22079	-1.80029	0.0766804	0.81675	-0.140137	2.22079	-0.859039	0.393628	0.837202
HNRNPA1P48	-0.283626	3.39683	-1.82614	0.0732073	0.81675	0.116585	3.39683	0.835707	0.407153	0.844351
EAF2	0.763098	1.38491	1.83317	0.0715998	0.81675	-0.174204	1.38491	-0.836811	0.408225	0.844835
CCDC88C	0.774937	2.95011	1.81526	0.0747097	0.81675	0.239615	2.95011	0.8292	0.413582	0.845083
BANF1P3	-0.557396	0.836275	-1.84201	0.0702569	0.81675	0.271903	0.836275	0.81566	0.417817	0.846689
ACTL6A	0.313721	6.24965	1.831	0.0746624	0.81675	-0.126965	6.24965	-0.813056	0.422133	0.848518
BCHE	-0.57369	6.35333	-1.80966	0.0757617	0.81675	0.226465	6.35333	0.798954	0.427979	0.851045
ISG20L2	0.185979	5.59099	1.83573	0.0716428	0.81675	0.074148	5.59099	0.793149	0.431077	0.853228
CFAP57	-0.835131	1.55677	-1.84629	0.0698996	0.81675	0.247947	1.55677	0.793042	0.432933	0.853949
ARL17A	-0.452356	1.69742	-1.80558	0.0765752	0.81675	0.153003	1.69742	0.788336	0.435675	0.854064
TRIM9	-0.361901	6.44899	-1.82112	0.0748323	0.81675	-0.136477	6.44899	-0.783112	0.438328	0.855534
CALR	-0.310065	7.46058	-1.83223	0.0739687	0.81675	-0.118686	7.46058	-0.780591	0.44043	0.855573
PAX8	2.30593	0.69328	1.85884	0.0682518	0.81675	0.667786	0.69328	0.782227	0.440184	0.855573
PCBP1-AS1	0.261482	5.33936	1.91006	0.0647795	0.81675	0.0989673	5.33936	0.785327	0.439132	0.855573
ZFYVE16	0.238006	5.01062	1.85902	0.0677927	0.81675	0.0808098	5.01062	0.765131	0.447176	0.85735
MEGF11	-1.14934	3.1958	-1.82167	0.0741069	0.81675	-0.278051	3.1958	-0.767973	0.456841	0.861072
CHML	0.62076	5.07993	1.82626	0.0728218	0.81675	-0.264058	5.07993	-0.74317	0.460199	0.862242
EED	0.375547	4.17822	1.87824	0.065052	0.81675	-0.0961701	4.17822	-0.743325	0.460092	0.862242
TARS	0.215783	7.48544	1.8433	0.0712734	0.81675	-0.0828985	7.48544	-0.742633	0.461315	0.862398
TBC1D9B	-0.253498	6.85766	-1.83633	0.0717141	0.81675	-0.0842902	6.85766	-0.729702	0.469363	0.86501
ELP3	0.133179	6.62035	1.85882	0.0677998	0.81675	0.0509266	6.62035	0.716016	0.47667	0.867113
LINC02340	1.0417	-0.726208	1.86242	0.0672841	0.81675	0.228314	-0.726208	0.720162	0.474132	0.867113
PDGFD	-0.933936	3.0986	-1.84357	0.0719588	0.81675	0.287981	3.0986	0.710543	0.483732	0.869659
ADSS	0.21828	5.63248	1.87501	0.0658889	0.81675	0.0796719	5.63248	0.689386	0.493263	0.872359
ZCWPW1	-0.535747	1.43956	-1.88036	0.0652229	0.81675	0.15909	1.43956	0.683782	0.497585	0.874683
ENO4	0.717935	0.704233	1.80941	0.076031	0.81675	0.177363	0.704233	0.689485	0.498621	0.875132
TCEA1P2	-0.376867	2.65212	-1.87203	0.0659208	0.81675	0.128672	2.65212	0.678435	0.50002	0.876066
TMEM143	0.331718	3.75777	1.89625	0.0664764	0.81675	0.133784	3.75777	0.679377	0.500292	0.876066
GCDH	-0.26837	3.50698	-1.85843	0.0678582	0.81675	0.0747469	3.50698	0.668865	0.506134	0.877987
MIGA1	-0.200805	4.76296	-1.82828	0.0747944	0.81675	0.0747573	4.76296	0.656236	0.514933	0.880586
RPLP0P6	-0.366244	4.0675	-1.83953	0.0709496	0.81675	0.143972	4.0675	0.653751	0.515692	0.880586
OIP5-AS1	0.208874	6.67449	1.82703	0.0733996	0.81675	-0.0707691	6.67449	-0.645344	0.521536	0.882077
TET3	0.378262	4.11794	1.88589	0.0714772	0.81675	0.134484	4.11794	0.632662	0.531854	0.886575
AL445623.2	0.598555	1.25104	1.89025	0.0644391	0.81675	-0.206826	1.25104	-0.623057	0.535791	0.887458
MVB12A	-0.334067	3.99051	-1.83865	0.0711129	0.81675	-0.0739042	3.99051	-0.617856	0.541702	0.889033
AL161756.1	0.665367	-0.262973	1.81637	0.0745699	0.81675	0.24402	-0.262973	0.598049	0.551999	0.892195
MLF2	-0.143091	8.66883	-1.81575	0.0745348	0.81675	-0.0450102	8.66883	-0.587429	0.559129	0.895596
C22orf24	-0.7525	1.094	-1.85751	0.0685957	0.81675	-0.212537	1.094	-0.584696	0.561327	0.895784
AL390039.1	-0.579413	0.0706289	-1.82586	0.0726875	0.81675	-0.149604	0.0706289	-0.565959	0.573464	0.897587
CCDC66	0.314761	3.95208	1.81187	0.0754118	0.81675	0.0723743	3.95208	0.569972	0.572605	0.897587
DHX30	-0.174752	7.4326	-1.81448	0.0745352	0.81675	0.05276	7.4326	0.573571	0.568346	0.897587
NEK9	0.340899	4.4685	1.85591	0.0702412	0.81675	0.0787688	4.4685	0.549734	0.587766	0.900659
PPCDC	-0.38303	2.92852	-1.85849	0.0700574	0.81675	0.101092	2.92852	0.543112	0.590543	0.901109
TADA3	-0.17116	6.36038	-1.83143	0.0724199	0.81675	-0.0426396	6.36038	-0.542237	0.590269	0.901109
MR1	-1.47037	-0.440613	-1.84123	0.070378	0.81675	-0.209058	-0.440613	-0.540671	0.592917	0.901508
DCAF15	-0.274057	3.27287	-1.88435	0.0663929	0.81675	0.0839829	3.27287	0.530747	0.597896	0.903469
RNF157	0.643186	3.57347	1.8217	0.073569	0.81675	-0.175142	3.57347	-0.521169	0.604174	0.904978
TIMM10B	0.214227	6.09743	1.8424	0.0716045	0.81675	-0.0636772	6.09743	-0.522896	0.603201	0.904978
SIX5	-0.693989	-1.98442	-1.87182	0.0660139	0.81675	0.11852	-1.98442	0.521675	0.605261	0.905306
FAM122A	0.326761	4.4001	1.85865	0.0697948	0.81675	-0.0831471	4.4001	-0.516704	0.608378	0.907262
AC109322.2	-1.43668	-1.30178	-1.84946	0.0691589	0.81675	-0.228307	-1.30178	-0.512984	0.609785	0.90802
BRF2	-0.23687	3.57568	-1.81445	0.0762514	0.81675	-0.0755238	3.57568	-0.503952	0.616247	0.909348
VDAC1P2	-0.439964	1.00541	-1.82251	0.0732012	0.81675	-0.125135	1.00541	-0.490893	0.625236	0.913023
HSP90AB3P	-0.340797	3.58439	-1.85563	0.0685463	0.81675	0.0927885	3.58439	0.468894	0.640795	0.916582
TOLLIP	-0.181658	6.72399	-1.84254	0.0707335	0.81675	-0.0427479	6.72399	-0.465845	0.643193	0.917687
AC006213.1	0.690022	0.504351	1.85242	0.0687394	0.81675	0.130165	0.504351	0.460596	0.646797	0.918878
IFNAR1	0.18087	6.12897	1.84883	0.0694106	0.81675	-0.0379401	6.12897	-0.441616	0.660405	0.92207
FTH1P2	-0.394029	4.82115	-1.81021	0.0753508	0.81675	-0.084974	4.82115	-0.421108	0.675213	0.92666
AC002074.1	-1.34317	-0.812943	-1.83456	0.0713806	0.81675	-0.167298	-0.812943	-0.422159	0.676094	0.927412
ACTBP11	-0.458878	2.98388	-1.80793	0.0754677	0.81675	0.112415	2.98388	0.411483	0.682137	0.927771
MLLT11	0.509389	9.95164	1.93663	0.0691942	0.81675	-0.111337	9.95164	-0.424126	0.67667	0.927771
PDLIM5	-0.42703	5.34116	-1.82483	0.0728596	0.81675	0.0558746	5.34116	0.408959	0.685037	0.92834
AC092119.2	-0.902142	-0.473962	-1.80579	0.0758302	0.81675	0.145371	-0.473962	0.401388	0.689718	0.929126
WASHC1	0.503561	0.914133	1.86165	0.0675716	0.81675	-0.0918539	0.914133	-0.398058	0.692099	0.929991
HLCS	-0.224519	5.22307	-1.84594	0.0699255	0.81675	-0.0446975	5.22307	-0.397336	0.692562	0.930151
AC115837.1	-0.548755	0.699859	-1.88516	0.0640959	0.81675	0.113689	0.699859	0.384624	0.701832	0.933562
NACA3P	-0.525048	1.47289	-1.83871	0.0720927	0.81675	0.103275	1.47289	0.38538	0.70174	0.933562
PPP2R3C	0.183516	5.87119	1.86292	0.0678584	0.81675	-0.0352372	5.87119	-0.378159	0.706788	0.935117
YWHAZP5	-0.386791	1.94363	-1.85601	0.0688623	0.81675	0.102557	1.94363	0.376005	0.708198	0.935676
TPT1P9	-0.369461	1.44784	-1.85017	0.0690552	0.81675	0.0816879	1.44784	0.372256	0.710971	0.936549
AC020915.3	0.338259	2.64072	1.85056	0.0692617	0.81675	0.0589038	2.64072	0.371753	0.711508	0.936568
RABGAP1	-0.186498	7.2639	-1.8242	0.0733572	0.81675	0.0340444	7.2639	0.367401	0.714737	0.938179
EYS	-0.884234	1.14135	-1.92907	0.0695868	0.81675	0.201055	1.14135	0.368108	0.715189	0.938318
RPF1	0.297202	4.5727	1.80937	0.0759999	0.81675	0.0537707	4.5727	0.355241	0.723875	0.939948
UBE2G1	0.22406	7.09097	1.82328	0.0731869	0.81675	-0.0432049	7.09097	-0.345679	0.730755	0.941064
RPS4XP6	-0.670034	-0.0990153	-1.85289	0.0686582	0.81675	0.132549	-0.0990153	0.344846	0.731378	0.941135
CHTOP	0.202872	6.91631	1.91644	0.0650407	0.81675	0.035371	6.91631	0.342636	0.73443	0.942131
DCAF13	0.202124	6.69348	1.88969	0.0643505	0.81675	-0.0337766	6.69348	-0.337523	0.737131	0.942913
TMBIM6	-0.208855	10.5878	-1.83014	0.0765113	0.81675	0.0353445	10.5878	0.326058	0.746769	0.945176
TTC3	0.204533	9.2502	1.81324	0.0753083	0.81675	-0.0340812	9.2502	-0.3244	0.746922	0.945176
AC115223.1	-0.387012	2.24024	-1.86851	0.0664172	0.81675	0.0665773	2.24024	0.308023	0.759097	0.949576
LAMTOR1	-0.201323	6.48197	-1.80681	0.0764577	0.81675	-0.0312741	6.48197	-0.308316	0.759144	0.949576
LINC00327	-0.810077	0.0753485	-1.8475	0.0694824	0.81675	0.115861	0.0753485	0.30743	0.759571	0.949741
RAB12	-0.788505	1.10818	-1.82924	0.075335	0.81675	-0.129119	1.10818	-0.301481	0.764678	0.951108
ZNF100	0.329059	4.11854	1.85537	0.0705268	0.81675	0.0475197	4.11854	0.305332	0.762095	0.951108
AL354702.1	-0.500098	2.31864	-1.85862	0.0678298	0.81675	0.0556421	2.31864	0.288196	0.774225	0.951897
GSTP1	-0.320953	8.48413	-1.82947	0.0747409	0.81675	-0.0472314	8.48413	-0.286653	0.776023	0.951897
SLC9A9	-0.368422	4.41386	-1.81982	0.0772018	0.81675	-0.0887321	4.41386	-0.283568	0.777691	0.951897
WAC-AS1	0.402308	3.42398	1.86826	0.0689514	0.81675	0.0518217	3.42398	0.286815	0.776509	0.951897
NDUFV1	-0.19888	7.67315	-1.83099	0.0750206	0.81675	0.0299415	7.67315	0.282104	0.779442	0.951951
AC114811.2	-0.704704	0.671329	-1.85765	0.0726949	0.81675	0.106076	0.671329	0.27813	0.782658	0.95245
RPL14P1	-0.380133	2.29559	-1.83422	0.0714213	0.81675	-0.0706331	2.29559	-0.273059	0.785715	0.953084
HMGN3-AS1	-0.55494	1.08314	-1.81872	0.0738077	0.81675	0.0586372	1.08314	0.269676	0.788453	0.953825
RHEBL1	0.427481	1.98507	1.85086	0.0744292	0.81675	-0.0898474	1.98507	-0.266689	0.790635	0.954671
AL354714.2	-0.406288	2.5376	-1.83118	0.0727307	0.81675	0.0669149	2.5376	0.253236	0.800933	0.956534
ANKRD35	-0.906126	0.414777	-1.86808	0.0720529	0.81675	0.150034	0.414777	0.243319	0.808747	0.958014
DOCK6	-0.694802	1.89607	-1.82752	0.0724424	0.81675	-0.0536919	1.89607	-0.230727	0.818646	0.960025
CEP170	0.453047	7.43517	1.96306	0.0674225	0.81675	-0.051714	7.43517	-0.228827	0.822147	0.960812
TMEM256	-0.323069	3.13246	-1.82527	0.0727884	0.81675	-0.0302933	3.13246	-0.221274	0.825637	0.961431
TIMM8B	-0.239973	6.83815	-1.84353	0.0704193	0.81675	0.0285204	6.83815	0.217728	0.828382	0.962038
SKA2	0.231823	6.67066	1.8192	0.0769913	0.81675	-0.025667	6.67066	-0.214613	0.831415	0.96265
ZNF281	0.21711	6.54359	1.91401	0.0722104	0.81675	-0.0247435	6.54359	-0.215933	0.831445	0.96265
AC008915.2	-0.664353	0.441242	-1.84135	0.070437	0.81675	-0.0592298	0.441242	-0.207735	0.836208	0.963501
COG4	-0.228536	6.79572	-1.87923	0.0649148	0.81675	0.0225554	6.79572	0.207117	0.836597	0.963566
NBPF11	0.532466	2.79222	1.79845	0.076975	0.81675	0.0434653	2.79222	0.204138	0.83895	0.964796
SRGAP2	0.4419	5.09062	1.83174	0.0717953	0.81675	0.0281138	5.09062	0.203556	0.839367	0.964934
ME3	-0.506375	2.52801	-1.8714	0.0709854	0.81675	0.103422	2.52801	0.197437	0.844133	0.966423
AC007622.2	0.718195	0.101583	1.80718	0.0763264	0.81675	0.0745467	0.101583	0.186534	0.852694	0.967203
APMAP	-0.200707	7.97631	-1.80911	0.0772141	0.81675	-0.0200361	7.97631	-0.184075	0.85479	0.967203
AC130650.2	-0.499726	2.79144	-1.85075	0.0696348	0.81675	0.0428811	2.79144	0.175986	0.861007	0.969611
SEMA3B	-1.3953	0.804845	-1.82292	0.0732243	0.81675	-0.0648764	0.804845	-0.174765	0.863675	0.970372
RPL7P23	-0.432914	1.73845	-1.85428	0.0684573	0.81675	-0.0351821	1.73845	-0.157985	0.874982	0.97233
TMSB4XP1	-0.694377	1.33496	-1.85646	0.0686083	0.81675	0.0672213	1.33496	0.153294	0.878665	0.973944
UACA	-0.768141	2.67216	-1.83775	0.0710839	0.81675	0.0215399	2.67216	0.151926	0.880484	0.974219
PARP11	0.277719	3.48076	1.88506	0.0643061	0.81675	0.0192705	3.48076	0.149601	0.881608	0.974399
CUL9	-0.455439	3.87881	-1.85955	0.0676958	0.81675	0.0209149	3.87881	0.142612	0.887223	0.975681
BHLHE40-AS1	-0.903834	-0.128436	-1.84499	0.0708981	0.81675	0.0479229	-0.128436	0.131841	0.8961	0.978839
AC097658.1	-0.791352	1.06061	-1.82869	0.0743508	0.81675	0.0602548	1.06061	0.126228	0.900033	0.979292
WIPF3	1.16534	1.18977	1.83866	0.0717787	0.81675	-0.0623125	1.18977	-0.116086	0.908178	0.980814
ZNF266	0.309659	4.59962	1.88037	0.0675381	0.81675	-0.0163096	4.59962	-0.113639	0.910341	0.981779
ANXA2P1	-0.823717	0.517083	-1.91002	0.0653073	0.81675	-0.0498132	0.517083	-0.109871	0.913109	0.98182
NSRP1	0.304334	3.91091	1.83913	0.07081	0.81675	0.0114556	3.91091	0.107622	0.914924	0.981981
FIS1	-0.234842	6.61646	-1.80348	0.0764222	0.81675	-0.0121121	6.61646	-0.0926968	0.926448	0.984608
ILF3	-0.160146	7.25511	-1.88763	0.0654623	0.81675	-0.00729414	7.25511	-0.0942199	0.925413	0.984608
MPP2	-0.23192	6.49881	-1.85239	0.071113	0.81675	-0.0116225	6.49881	-0.091575	0.927447	0.984624
CCK	-0.976271	-0.707369	-1.8542	0.076164	0.81675	0.0605775	-0.707369	0.0839024	0.933459	0.984857
CFAP97	0.182591	6.34303	1.8713	0.0663629	0.81675	-0.00734907	6.34303	-0.08048	0.936134	0.984857
DOCK1	-0.710716	3.782	-1.86168	0.0674305	0.81675	0.0122572	3.782	0.0797886	0.937166	0.984857
ETHE1	0.247451	3.66451	1.79952	0.0772714	0.81675	-0.0116436	3.66451	-0.0794971	0.936898	0.984857
LRIG3	-1.85182	1.21188	-1.86656	0.0670992	0.81675	-0.0235585	1.21188	-0.0896816	0.929033	0.984857
SOD1	-0.191116	8.65722	-1.82768	0.0733161	0.81675	0.00732467	8.65722	0.0726318	0.942376	0.985999
MMAA	0.281948	4.40693	1.82412	0.0753705	0.81675	-0.0116591	4.40693	-0.0721001	0.942823	0.986148
AC010980.1	1.11896	0.509432	1.81537	0.0747017	0.81675	0.042737	0.509432	0.070999	0.94364	0.986416
CCBE1	-1.31473	-0.526466	-1.83617	0.0711283	0.81675	-0.0291041	-0.526466	-0.0691855	0.945065	0.986835
SAP130	0.268705	5.44965	1.88331	0.0644421	0.81675	-0.00648424	5.44965	-0.0599944	0.952391	0.98898
CTSD	-0.252696	5.5853	-1.88965	0.0658208	0.81675	0.00633143	5.5853	0.057387	0.954684	0.989114
VWA5A	-0.419746	6.19824	-1.91561	0.0658109	0.81675	0.0108714	6.19824	0.0539351	0.957485	0.989706
CAHM	-0.696039	0.749188	-1.87642	0.0653435	0.81675	-0.0108685	0.749188	-0.0417436	0.96687	0.992568
EIF3J	0.195925	5.21979	1.8469	0.0695353	0.81675	-0.00416901	5.21979	-0.040991	0.967435	0.992568
RPS6KA6	0.379422	3.94545	1.87345	0.0684257	0.81675	-0.00702381	3.94545	-0.0289121	0.977039	0.994413
TUSC2	-0.123427	6.05541	-1.83914	0.0721531	0.81675	0.00105376	6.05541	0.015807	0.987452	0.996828
DNAJC19P9	-0.342431	1.80048	-1.79788	0.0774479	0.816995	-0.081688	1.80048	-0.392133	0.69631	0.931608
PTPRU	-0.59637	3.67998	-1.80758	0.0774334	0.816995	-0.119681	3.67998	-0.324191	0.747029	0.945176
H2AFV	-0.164129	6.97498	-1.79471	0.077906	0.817143	-0.148695	6.97498	-1.824	0.0735582	0.74447
KIAA1671	-0.537827	2.3122	-1.79909	0.078003	0.817143	0.464246	2.3122	1.92853	0.0622684	0.74447
RPS10P3	-0.482395	0.642907	-1.78921	0.078465	0.817143	0.594329	0.642907	2.12298	0.0377553	0.74447
STXBP4	0.357856	4.17527	1.8006	0.0779507	0.817143	0.266292	4.17527	1.68257	0.102565	0.74447
TBC1D7	0.184074	5.70253	1.8021	0.0781916	0.817143	-0.177994	5.70253	-1.75447	0.0858952	0.74447
RPP30	0.165181	5.29011	1.79289	0.0784732	0.817143	-0.135376	5.29011	-1.55553	0.125571	0.746138
CAPNS1	-0.267765	6.45959	-1.82173	0.077672	0.817143	-0.154024	6.45959	-1.12247	0.2714	0.796883
SLC45A3	0.680159	1.15075	1.79303	0.077984	0.817143	0.3329	1.15075	0.995477	0.323571	0.809684
AC002480.1	-1.11432	-1.9105	-1.7899	0.0784223	0.817143	-0.30846	-1.9105	-0.78624	0.436803	0.855318
PBX1	0.293388	6.94666	1.79994	0.0778702	0.817143	0.11354	6.94666	0.702908	0.485251	0.869984
NET1	-0.273477	5.16772	-1.80031	0.0778205	0.817143	0.0970189	5.16772	0.68822	0.494703	0.87355
CTU2	-0.241266	3.9958	-1.79481	0.0782809	0.817143	-0.103764	3.9958	-0.683945	0.496603	0.874248
CRISPLD1	-0.425503	6.54844	-1.80354	0.0784651	0.817143	0.096445	6.54844	0.54243	0.593735	0.901585
SMIM5	1.31089	-0.853388	1.79103	0.0781701	0.817143	0.221426	-0.853388	0.513998	0.609081	0.907682
GPR162	-0.220834	5.92642	-1.80362	0.0784492	0.817143	0.0570526	5.92642	0.415028	0.679792	0.927771
FABP5P7	-0.299912	3.57028	-1.80028	0.0779077	0.817143	0.0552263	3.57028	0.299097	0.765931	0.951199
RUVBL2	-0.199942	7.19415	-1.79688	0.0775685	0.817143	-0.0322591	7.19415	-0.297382	0.767212	0.95125
HSD17B8	-0.433198	3.42925	-1.8111	0.0784	0.817143	0.0423189	3.42925	0.213735	0.8328	0.96265
AC092376.2	0.735179	0.982308	1.79141	0.0781771	0.817143	-0.0461641	0.982308	-0.138069	0.89068	0.976745
GCA	-0.254302	5.07646	-1.7958	0.0775447	0.817143	-0.00460991	5.07646	-0.0392688	0.968816	0.992884
LINC00653	-0.547323	0.755429	-1.78834	0.0787328	0.817459	0.346	0.755429	1.41927	0.161612	0.752666
FLAD1	0.191148	6.15597	1.79392	0.0786717	0.817459	-0.139321	6.15597	-1.3087	0.196164	0.762421
ZNF549	0.225536	4.93574	1.79694	0.0787399	0.817459	0.159955	4.93574	1.27128	0.209531	0.765684
FAM174A	-0.284628	4.68169	-1.80489	0.0785835	0.817459	-0.189771	4.68169	-1.17187	0.247515	0.784374
MYSM1	0.200253	4.1084	1.78743	0.0787565	0.817459	0.0198086	4.1084	0.188322	0.851239	0.967203
TACO1	-0.214928	4.50963	-1.80515	0.0790257	0.818151	-0.12837	4.50963	-1.15829	0.255195	0.787568
DAZAP1	0.600968	1.93656	1.79158	0.0788931	0.818151	-0.315901	1.93656	-1.04039	0.303301	0.803022
BBS4	-0.191365	6.1621	-1.79431	0.0789816	0.818151	-0.0620836	6.1621	-0.665146	0.50983	0.877987
AC012640.2	-0.465287	1.37317	-1.78581	0.07902	0.818151	0.14908	1.37317	0.577993	0.565363	0.897347
CNKSR2	0.31146	4.64241	1.82429	0.0797965	0.818771	0.369131	4.64241	2.04253	0.0496701	0.74447
STX17	-0.148884	5.00033	-1.78471	0.0792535	0.818771	0.159388	5.00033	2.27541	0.0264843	0.74447
NPAT	0.207094	5.32047	1.78443	0.079605	0.818771	0.110342	5.32047	1.09972	0.276427	0.796883
CAPZA2	0.203311	8.52176	1.78558	0.0798291	0.818771	-0.114325	8.52176	-1.03341	0.305992	0.804349
ATAD2B	0.233147	5.03696	1.79029	0.0791844	0.818771	0.12461	5.03696	0.970325	0.3362	0.812134
MFN2	-0.227404	7.50952	-1.78648	0.0797646	0.818771	0.0861949	7.50952	0.700054	0.486937	0.870032
FKBP7	0.292236	4.74531	1.78789	0.07989	0.818771	-0.131713	4.74531	-0.694948	0.489768	0.871431
RBM43	-1.23295	0.400145	-1.78379	0.0795451	0.818771	-0.205831	0.400145	-0.683464	0.49753	0.874683
PGAP3	-0.239352	4.1474	-1.7847	0.079202	0.818771	-0.0622499	4.1474	-0.620112	0.537456	0.887952
SHC4	0.346116	4.92391	1.81094	0.0796307	0.818771	-0.15461	4.92391	-0.616822	0.539871	0.888712
GYG2	-0.261758	6.22924	-1.80121	0.0795414	0.818771	0.0790512	6.22924	0.602431	0.551371	0.892195
PORCN	-0.251526	4.19664	-1.78687	0.0797485	0.818771	-0.0774836	4.19664	-0.546171	0.587127	0.900659
SLC25A21	-0.98399	-9.71671e-06	-1.78352	0.0793953	0.818771	-0.110326	-9.71671e-06	-0.343082	0.732697	0.94194
SPATC1L	-0.598105	3.51472	-1.81582	0.079671	0.818771	0.0525099	3.51472	0.158531	0.875087	0.972351
MED18	0.375886	3.26474	1.78051	0.0798961	0.818771	-0.00937224	3.26474	-0.0737909	0.941471	0.985882
CDK19	0.401039	3.60345	1.79781	0.0797783	0.818771	-0.01025	3.60345	-0.0571216	0.954963	0.989285
KRBA2	0.32443	2.47737	1.78112	0.080024	0.818986	0.415214	2.47737	2.63176	0.0109829	0.74447
RPL3P2	-0.420768	2.13662	-1.77966	0.0800322	0.818986	0.331161	2.13662	1.4333	0.156795	0.752666
LCORL	0.329414	5.67604	1.82607	0.0800692	0.818986	0.209123	5.67604	1.10904	0.27664	0.796883
CLK1	-0.296672	5.91799	-1.78308	0.0804236	0.819228	0.275091	5.91799	1.9445	0.0586387	0.74447
AL049749.1	-1.01774	-1.51406	-1.84921	0.0803169	0.819228	-1.11547	-1.51406	-1.42846	0.159512	0.752666
ZNF234	0.295503	4.41864	1.78078	0.0803624	0.819228	0.190285	4.41864	1.28452	0.204636	0.764527
CCDC87	0.826115	-0.386496	1.78167	0.0802916	0.819228	0.590023	-0.386496	1.10061	0.275344	0.796883
SDAD1	0.173997	5.57752	1.77737	0.0805127	0.819228	-0.0938875	5.57752	-1.03387	0.305275	0.804349
RPS7P11	-0.344513	1.37592	-1.77693	0.0804845	0.819228	-0.19614	1.37592	-0.979474	0.331152	0.811361
TXNL1	0.141792	7.13761	1.77821	0.0805491	0.819228	0.0587029	7.13761	0.737205	0.463837	0.863701
OGFOD1	0.170758	6.2278	1.78167	0.080356	0.819228	-0.0589234	6.2278	-0.639539	0.525123	0.882818
TRAPPC9	-0.284868	5.10819	-1.7794	0.0804411	0.819228	0.044577	5.10819	0.294612	0.769345	0.95125
AIG1	-0.253787	6.44404	-1.84222	0.0806563	0.819803	-0.064736	6.44404	-0.489496	0.630726	0.914418
ZNF347	0.306322	4.15104	1.77576	0.08073	0.820036	-0.109505	4.15104	-0.88454	0.380611	0.827846
PEX7	-0.319039	2.99713	-1.77558	0.0809234	0.820521	-0.0789954	2.99713	-0.473954	0.63727	0.916002
ARF5	-0.173185	7.19452	-1.78096	0.0808567	0.820521	-0.0132488	7.19452	-0.136855	0.891661	0.977004
AC091978.1	-0.529195	0.501252	-1.77426	0.08093	0.820521	0.0098907	0.501252	0.0349687	0.972217	0.99399
NDP	-1.27015	0.412456	-1.77444	0.0810838	0.821565	-0.2288	0.412456	-0.994271	0.331844	0.811361
AC024060.1	-0.439352	0.954488	-1.77558	0.0813998	0.821675	0.482863	0.954488	2.14238	0.0369628	0.74447
DIO2	-1.26389	-0.484111	-1.77335	0.0813219	0.821675	0.848489	-0.484111	1.91038	0.067175	0.74447
AF131216.3	-0.69839	-0.305389	-1.82216	0.0812779	0.821675	-0.980436	-0.305389	-1.36555	0.17703	0.755938
BSG	-0.23137	9.31682	-1.78219	0.0813161	0.821675	-0.110672	9.31682	-0.883491	0.381662	0.828697
NAE1	0.171316	6.9066	1.77318	0.0813558	0.821675	0.0719765	6.9066	0.771434	0.443469	0.855573
EIF2S2P4	-0.385405	1.41302	-1.77292	0.0811542	0.821675	0.0809841	1.41302	0.392736	0.695861	0.931497
PTGFR	-0.546951	2.3703	-1.79955	0.0814964	0.822137	-0.135133	2.3703	-0.321123	0.749271	0.946087
TMEM106C	-0.310431	7.36296	-1.81845	0.0816964	0.823127	-0.374015	7.36296	-2.31985	0.0312017	0.74447
ACOT8	-0.221289	5.1874	-1.78156	0.0816553	0.823127	-0.0487118	5.1874	-0.380963	0.704882	0.934779
AC078785.1	0.614094	0.664313	1.76906	0.0818996	0.82466	0.158908	0.664313	0.546213	0.58704	0.900659
TIMM8BP2	-0.53694	0.948185	-1.76971	0.0820203	0.825361	0.396911	0.948185	1.17388	0.244937	0.783854
CCDC51	0.172796	4.99751	1.76832	0.0821547	0.826199	-0.0284391	4.99751	-0.298908	0.766032	0.951199
AC022400.8	-0.514459	1.89021	-1.76628	0.0822739	0.82637	0.12628	1.89021	0.721439	0.474651	0.867113
FAM181A	-1.2675	0.995178	-1.76707	0.0822347	0.82637	0.107501	0.995178	0.456963	0.654834	0.921231
PRRC2C	0.249954	5.94678	1.7654	0.0825069	0.82744	0.168718	5.94678	1.66103	0.103356	0.74447
EPHA2	-1.60347	2.20319	-1.76482	0.0826365	0.82744	-0.681607	2.20319	-1.56865	0.141757	0.751127
ANAPC5	-0.17556	7.61981	-1.7742	0.0824955	0.82744	-0.0597143	7.61981	-0.637121	0.5273	0.884728
DHX29	0.19184	5.32276	1.76423	0.0826194	0.82744	0.0245196	5.32276	0.234437	0.815419	0.959305
CROCC	-0.856263	2.20637	-1.76495	0.0825823	0.82744	-0.0463517	2.20637	-0.107225	0.914964	0.981981
FLNA	-0.533424	6.25643	-1.76396	0.0826886	0.827449	-0.10734	6.25643	-0.71298	0.484113	0.869659
PIAS1	0.178132	7.33671	1.81284	0.0828029	0.82808	0.160744	7.33671	1.64757	0.113033	0.74447
SCAF8	0.233389	4.96801	1.76715	0.0828882	0.82842	0.168348	4.96801	1.45986	0.151066	0.752666
DHDDS	-0.178061	6.00288	-1.76467	0.0839202	0.828673	-0.199221	6.00288	-2.0636	0.0445801	0.74447
GPD1	-1.56234	0.0646067	-1.75002	0.0852644	0.828673	1.12909	0.0646067	2.28807	0.034006	0.74447
JPH1	0.438754	1.85339	1.758	0.0836824	0.828673	-0.679354	1.85339	-2.45785	0.0167861	0.74447
SCML1	-0.398655	3.98345	-1.77365	0.0852868	0.828673	-0.488321	3.98345	-2.03724	0.0482182	0.74447
TONSL	-0.61407	3.15994	-1.75824	0.0837274	0.828673	-0.316871	3.15994	-1.76045	0.0951765	0.74447
Z97989.1	0.472911	3.15473	1.75854	0.0848786	0.828673	0.486155	3.15473	1.94557	0.057897	0.74447
ZNF814	0.330694	3.32175	1.7503	0.0850222	0.828673	0.304358	3.32175	2.3654	0.0213293	0.74447
AJUBA	-1.52005	1.63094	-1.75785	0.0838761	0.828673	-0.370513	1.63094	-1.40508	0.179998	0.755938
AC009403.1	0.330022	1.94856	1.75338	0.0844802	0.828673	0.205701	1.94856	1.29331	0.200701	0.762421
EIF2S1	0.123896	7.26866	1.76	0.0837613	0.828673	-0.0819745	7.26866	-1.23587	0.221586	0.768712
MT-ATP6	0.294798	9.42	1.75724	0.0847948	0.828673	0.176557	9.42	1.14753	0.256881	0.788574
AC108690.1	-1.21027	0.847376	-1.86663	0.0842716	0.828673	-0.74796	0.847376	-1.16453	0.265432	0.792764
RPS18P12	-0.402427	1.90977	-1.7544	0.0843022	0.828673	0.266069	1.90977	1.05595	0.295088	0.798861
WASHC2C	-0.19422	5.271	-1.75541	0.0841917	0.828673	-0.0943621	5.271	-1.06636	0.290746	0.798861
CALM2P3	-0.341487	2.17595	-1.7528	0.0854926	0.828673	0.248243	2.17595	1.05189	0.296943	0.799149
GPC3	-1.55085	2.53403	-1.76085	0.0832839	0.828673	0.44642	2.53403	1.08253	0.299152	0.800694
THAP3	-0.207258	4.34664	-1.76247	0.0838408	0.828673	0.0961539	4.34664	0.880725	0.382707	0.829662
POLR3G	0.434392	1.63084	1.75231	0.085085	0.828673	0.194935	1.63084	0.866636	0.389899	0.834045
AL080243.2	-0.522014	0.371851	-1.75045	0.0854297	0.828673	0.252511	0.371851	0.816246	0.417542	0.846656
RPL15P2	-0.384737	2.07847	-1.74728	0.0855395	0.828673	0.211783	2.07847	0.81403	0.418743	0.847262
ALPL	1.49403	-0.248462	1.78528	0.0831814	0.828673	-0.574107	-0.248462	-0.810009	0.427141	0.850859
MIR1244-2	0.388267	2.33409	1.75143	0.0848553	0.828673	0.154135	2.33409	0.757573	0.451581	0.858793
GTF2F2	-0.212985	5.24275	-1.74733	0.0855798	0.828673	0.084546	5.24275	0.754588	0.453367	0.859049
GRM7	-0.76797	3.11269	-1.79931	0.0847348	0.828673	-0.358475	3.11269	-0.737209	0.465723	0.864163
SCLT1	0.263833	3.78275	1.76283	0.0837071	0.828673	-0.0889815	3.78275	-0.731423	0.468945	0.86501
PPP4C	-0.212982	7.26339	-1.75357	0.0853909	0.828673	-0.0770511	7.26339	-0.670231	0.505754	0.877987
ATP5ME	-0.264237	5.64928	-1.75252	0.0850558	0.828673	0.101447	5.64928	0.643401	0.522389	0.882077
AC007731.1	-0.492065	0.987793	-1.75195	0.0849604	0.828673	0.155027	0.987793	0.620625	0.537311	0.887952
R3HCC1	-0.17635	6.57238	-1.75204	0.0849111	0.828673	0.066698	6.57238	0.619854	0.537628	0.887952
AC131235.1	-0.494892	1.34228	-1.75791	0.0839565	0.828673	-0.172177	1.34228	-0.58809	0.558621	0.895515
RPN2	-0.186765	9.05017	-1.76092	0.084514	0.828673	-0.0578133	9.05017	-0.581604	0.56368	0.896176
HOTAIRM1	-0.990121	0.597429	-1.75445	0.0848217	0.828673	0.235368	0.597429	0.580691	0.565471	0.897347
SYNGR2	-0.301214	4.91369	-1.76492	0.0837372	0.828673	-0.0780475	4.91369	-0.547815	0.58719	0.900659
TTC21B	0.197247	4.8459	1.75885	0.0839493	0.828673	0.052559	4.8459	0.52475	0.6019	0.904686
BAG5	0.13027	6.52279	1.76544	0.0848453	0.828673	0.0281948	6.52279	0.392065	0.697051	0.931774
NPM1P39	-0.469206	0.00586316	-1.75151	0.0848981	0.828673	0.0982715	0.00586316	0.390377	0.697604	0.931965
SFXN1	-0.162601	7.17028	-1.7603	0.0832897	0.828673	-0.0306679	7.17028	-0.351355	0.726513	0.940064
RMRP	-0.653853	0.686346	-1.76028	0.0842169	0.828673	0.141267	0.686346	0.334879	0.738875	0.943425
LUZP1	0.283669	4.485	1.74851	0.0853266	0.828673	-0.0383208	4.485	-0.319554	0.750416	0.946163
HDAC1	-0.315449	4.93227	-1.75327	0.0845597	0.828673	0.0295875	4.93227	0.302974	0.763112	0.951108
SMC6	0.203906	5.22639	1.7633	0.0854516	0.828673	-0.0295168	5.22639	-0.271983	0.787194	0.953361
ANGPTL2	-1.651	1.57166	-1.75	0.0850665	0.828673	0.0976205	1.57166	0.254841	0.802618	0.957018
TRAPPC2	0.191903	5.69304	1.78443	0.0839417	0.828673	0.0316587	5.69304	0.240988	0.810545	0.958792
MRPS35	0.151444	6.50166	1.75248	0.0850503	0.828673	0.0165213	6.50166	0.188789	0.850896	0.967203
NKAPL	0.873585	-1.7077	1.82186	0.0852029	0.828673	-0.114998	-1.7077	-0.170237	0.865558	0.970697
CCDC181	0.337914	3.69404	1.76541	0.0829955	0.828673	0.0252717	3.69404	0.161248	0.872636	0.972267
MSH5	-1.05467	-0.858524	-1.7501	0.0850488	0.828673	0.0517157	-0.858524	0.160257	0.873199	0.972267
WASH8P	0.750127	1.48281	1.75469	0.084436	0.828673	-0.0489447	1.48281	-0.13495	0.893138	0.977318
TPRN	0.675395	1.11754	1.75803	0.0836777	0.828673	0.0373444	1.11754	0.128505	0.898166	0.979075
MYH7	-1.47467	0.0829783	-1.76238	0.0833867	0.828673	-0.0255266	0.0829783	-0.0953564	0.924379	0.984052
CLPTM1	-0.217251	6.53867	-1.75874	0.0840835	0.828673	0.010284	6.53867	0.0918899	0.927132	0.984624
FOXK2	0.244423	3.97021	1.75143	0.0855606	0.828673	0.00387044	3.97021	0.031632	0.974899	0.994291
POU3F3	1.21683	0.191752	1.74729	0.0858508	0.828923	0.399676	0.191752	1.7085	0.0957081	0.74447
TMEM206	-0.376614	5.62273	-1.78903	0.0858431	0.828923	0.170148	5.62273	0.869371	0.39512	0.837985
AP2S1	-0.233738	5.8242	-1.75088	0.0858621	0.828923	-0.0974174	5.8242	-0.749034	0.457157	0.861387
TCF4	-0.550375	7.10543	-1.75151	0.085754	0.828923	-0.12658	7.10543	-0.503086	0.617973	0.909569
TMEM50B	-0.202944	6.42521	-1.75901	0.0857367	0.828923	-0.0129364	6.42521	-0.121308	0.904098	0.9804
FAHD2CP	-0.386716	2.13236	-1.74461	0.0860677	0.829171	0.304528	2.13236	1.4862	0.142312	0.751358
STK25	-0.172531	7.83882	-1.74786	0.0860615	0.829171	-0.102237	7.83882	-1.08674	0.281899	0.796883
PRPF40B	-0.217	3.65769	-1.74436	0.0860529	0.829171	0.0522111	3.65769	0.557686	0.579067	0.897671
CHRNB3	0.948844	0.394152	1.87436	0.086093	0.829171	0.197519	0.394152	0.237566	0.813213	0.959216
OGDH	-0.319321	6.02423	-1.77194	0.0862686	0.830367	-0.151049	6.02423	-0.876913	0.388074	0.833357
ADGRB3	-0.262433	6.08399	-1.74618	0.0864292	0.830429	0.221708	6.08399	1.52217	0.133661	0.746771
LIN54	0.289375	4.26249	1.74289	0.0863367	0.830429	-0.149199	4.26249	-1.0508	0.297489	0.799686
NSUN2	0.271593	5.76512	1.74775	0.0864272	0.830429	-0.129511	5.76512	-1.0101	0.318823	0.809684
AC105250.1	-0.564365	1.24279	-1.74092	0.0866595	0.832147	0.0212297	1.24279	0.0884128	0.929848	0.984857
JADE1	0.274749	5.92901	1.75229	0.0869492	0.832663	-0.162143	5.92901	-1.11656	0.271361	0.796883
AL353796.1	0.520082	1.47299	1.74304	0.086981	0.832663	0.148558	1.47299	0.521193	0.604331	0.904978
HNRNPA3	0.170131	6.42516	1.73977	0.086869	0.832663	-0.0368842	6.42516	-0.437951	0.662949	0.92266
PSMD12	0.168546	6.97316	1.74993	0.0870044	0.832663	-0.0232683	6.97316	-0.252387	0.801953	0.956909
LMAN2	-0.191717	7.37412	-1.74136	0.0870467	0.832663	-0.0185023	7.37412	-0.181718	0.856468	0.967794
FTLP3	-0.4041	4.51299	-1.73857	0.0870738	0.832663	-0.0359329	4.51299	-0.165338	0.869216	0.971533
CCAR2	-0.198005	6.37815	-1.74375	0.0868366	0.832663	-0.00281762	6.37815	-0.0286518	0.977263	0.994413
PSAP	-0.16741	11.2434	-1.74112	0.0871709	0.833098	0.0405894	11.2434	0.446887	0.656698	0.921371
ZNF836	0.409714	3.30951	1.75279	0.0872532	0.833392	0.336516	3.30951	1.61541	0.116286	0.74447
GPX3	-0.424952	6.14743	-1.74687	0.087449	0.833454	-0.174457	6.14743	-0.856694	0.398182	0.839154
TCF25	-0.178966	6.74962	-1.74719	0.0875176	0.833454	-0.06122	6.74962	-0.654495	0.516723	0.880586
ATG12	0.207702	6.75341	1.74115	0.0873116	0.833454	-0.0591558	6.75341	-0.514042	0.609268	0.907835
NEXN	1.00193	1.07576	1.73693	0.0874681	0.833454	-0.130045	1.07576	-0.415563	0.682042	0.927771
MIPOL1	0.425214	2.71741	1.73661	0.0874268	0.833454	-0.00725451	2.71741	-0.0450679	0.964232	0.992388
MT-TE	-0.609137	0.578814	-1.7357	0.0877155	0.833623	0.497781	0.578814	1.92395	0.0603063	0.74447
NKAPP1	0.659339	0.355257	1.7329	0.0881034	0.833623	0.597043	0.355257	1.95278	0.055521	0.74447
AC025165.5	0.472596	0.651897	1.73663	0.0876245	0.833623	0.426379	0.651897	1.47842	0.144363	0.752666
ETV4	0.454779	4.6618	1.75188	0.0882965	0.833623	-0.467424	4.6618	-1.41939	0.161357	0.752666
NWD2	0.879225	2.14522	1.78226	0.0878181	0.833623	-0.847778	2.14522	-1.47226	0.14939	0.752666
LPXN	-0.388894	1.70372	-1.7305	0.0885165	0.833623	0.169489	1.70372	1.2818	0.204685	0.764527
CDK12	0.277123	3.53803	1.73045	0.088525	0.833623	0.123093	3.53803	1.09994	0.275611	0.796883
HMGN1	0.211433	7.46577	1.7395	0.0879935	0.833623	-0.121709	7.46577	-1.11141	0.272282	0.796883
ZNF658	0.264686	3.54387	1.73271	0.0885131	0.833623	0.129883	3.54387	1.03729	0.304779	0.804349
PAUPAR	-1.3682	-1.27237	-1.73576	0.0878513	0.833623	0.498723	-1.27237	1.03808	0.309539	0.80583
PCDH7	0.478227	4.29185	1.73125	0.0884002	0.833623	-0.196761	4.29185	-0.958362	0.342002	0.813418
AC113404.3	-0.324651	2.53718	-1.74034	0.0878593	0.833623	-0.1482	2.53718	-0.883427	0.38171	0.828697
NDUFAF4	0.196205	5.83329	1.7321	0.0885224	0.833623	-0.0775279	5.83329	-0.606492	0.546404	0.889441
TG	-1.23075	1.21772	-1.8552	0.088338	0.833623	-0.633265	1.21772	-0.534607	0.595092	0.902184
TCEA2	-0.222297	6.43735	-1.76247	0.0876716	0.833623	-0.0553281	6.43735	-0.465227	0.645471	0.918591
IFT43	-0.191657	5.34339	-1.73274	0.088567	0.833623	-0.0263015	5.34339	-0.276688	0.783144	0.95245
TCAF1P1	-0.237613	3.75754	-1.73024	0.0885622	0.833623	-0.0273794	3.75754	-0.183036	0.855367	0.967203
UBE2L3	0.116258	7.58108	1.73741	0.0880204	0.833623	-0.00858595	7.58108	-0.135346	0.892849	0.977134
RLN2	-1.10125	-0.240577	-1.73295	0.0881627	0.833623	-0.042173	-0.240577	-0.128315	0.898404	0.979168
FAM200B	0.197812	6.60993	1.73449	0.0880852	0.833623	0.00826231	6.60993	0.0757262	0.939891	0.985505
TAF1A	0.366133	3.83519	1.75752	0.0886814	0.834214	0.125859	3.83519	0.608314	0.547366	0.889852
TET1	0.337477	4.86398	1.76084	0.0888035	0.834392	0.462395	4.86398	2.43276	0.0213808	0.74447
PPP1CC	0.161073	7.04912	1.73152	0.0888015	0.834392	0.0218831	7.04912	0.247664	0.805288	0.957386
CEBPZOS	0.291457	4.86292	1.72758	0.0890424	0.835385	-0.209776	4.86292	-1.59865	0.114983	0.74447
PIDD1	-0.40558	3.48397	-1.72883	0.0890643	0.835385	-0.192814	3.48397	-1.39507	0.176891	0.755938
AC092115.1	-0.439734	2.33414	-1.72773	0.0890146	0.835385	-0.174131	2.33414	-0.739988	0.4621	0.862523
MED6	0.142241	4.99132	1.7293	0.0891953	0.836129	-0.118014	4.99132	-1.39673	0.167629	0.753715
ZNF37BP	-0.383899	3.27632	-1.72649	0.0892985	0.83613	0.200864	3.27632	1.37435	0.176892	0.755938
MYBPC1	-1.44328	-0.296681	-1.7386	0.0894113	0.83613	1.15179	-0.296681	1.32643	0.190971	0.760902
AC006538.1	-0.185394	5.20804	-1.73097	0.0895577	0.83613	-0.104589	5.20804	-1.22375	0.229676	0.77426
ZFR2	0.334427	3.92151	1.74085	0.0895136	0.83613	0.233812	3.92151	1.20609	0.234517	0.776218
PDCD6	0.595637	1.32296	1.72474	0.0895572	0.83613	0.253743	1.32296	1.16649	0.247884	0.784679
TRAPPC1	-0.188303	6.50382	-1.73464	0.0895538	0.83613	-0.109496	6.50382	-0.997535	0.323447	0.809684
RAB6B	0.404282	6.55771	1.75036	0.0893607	0.83613	-0.0162446	6.55771	-0.0694373	0.945034	0.986835
SRP9P1	-0.286574	3.34644	-1.72633	0.0899506	0.83693	0.194739	3.34644	1.08677	0.281463	0.796883
ZNF652	0.22693	4.84921	1.74022	0.0899766	0.83693	0.148203	4.84921	1.01616	0.314554	0.80819
LIFR-AS1	-0.366533	2.68947	-1.72304	0.0898651	0.83693	0.158229	2.68947	0.853641	0.39659	0.838583
RAB3IL1	0.661492	1.39275	1.72429	0.0901273	0.83693	-0.348374	1.39275	-0.840703	0.4038	0.842367
AC015813.5	-0.415333	0.49395	-1.72301	0.0901612	0.83693	-0.210755	0.49395	-0.83703	0.405804	0.843328
PLAG1	0.587304	2.04956	1.73022	0.0899775	0.83693	-0.235814	2.04956	-0.828972	0.412779	0.844929
RPUSD1	-0.154888	4.51498	-1.72312	0.0901329	0.83693	0.0564729	4.51498	0.64182	0.523424	0.882077
COX10-AS1	0.180275	4.27181	1.72562	0.0901367	0.83693	0.058495	4.27181	0.544116	0.588439	0.900801
RPL4	0.151074	8.37047	1.72405	0.0900124	0.83693	0.0463322	8.37047	0.539171	0.591778	0.901203
ATP11C	0.24197	4.50622	1.75995	0.0900669	0.83693	-0.0144006	4.50622	-0.085837	0.931978	0.984857
ABALON	0.329913	2.73825	1.72079	0.0905903	0.83755	0.299213	2.73825	1.75416	0.0849094	0.74447
DDX6	0.200794	7.13487	1.75406	0.0904235	0.83755	0.185327	7.13487	1.67642	0.105882	0.74447
NUMB	0.19526	5.50429	1.71852	0.0907315	0.83755	0.129303	5.50429	1.50213	0.138723	0.749732
ZFP3	0.614614	3.08705	1.79571	0.0908499	0.83755	-0.636659	3.08705	-1.18121	0.242775	0.782425
TRAM2-AS1	-0.29581	3.98325	-1.71912	0.0906597	0.83755	-0.159299	3.98325	-1.14274	0.257919	0.789819
APTR	-0.371758	3.76545	-1.72042	0.0907701	0.83755	0.134719	3.76545	0.706033	0.483245	0.869587
MED24	-0.206565	7.10225	-1.72096	0.0908451	0.83755	-0.064419	7.10225	-0.573688	0.568556	0.897587
NUBPL	-0.209325	4.65603	-1.72174	0.0905594	0.83755	0.0557129	4.65603	0.530303	0.598198	0.903587
SRSF10	0.145278	7.15339	1.72766	0.0904716	0.83755	-0.0288651	7.15339	-0.375241	0.709338	0.935774
ENTPD6	-0.256788	7.48833	-1.7291	0.0903438	0.83755	-0.0494157	7.48833	-0.326659	0.745276	0.944805
MRPL18	0.14959	6.01152	1.72165	0.0904455	0.83755	-0.025894	6.01152	-0.316054	0.753088	0.947192
HMGN4	0.152997	6.35689	1.72034	0.0907929	0.83755	0.0245181	6.35689	0.275619	0.783795	0.95245
GABRQ	-0.898894	2.90573	-1.71823	0.0909956	0.838415	0.761548	2.90573	2.37923	0.0250876	0.74447
ZNF480	0.24897	4.80203	1.72086	0.0913943	0.838437	0.264239	4.80203	2.35131	0.02531	0.74447
AC063952.1	-1.23888	-1.38735	-1.71477	0.0914061	0.838437	-0.595543	-1.38735	-1.4252	0.160274	0.752666
AC008443.3	-0.886248	0.374711	-1.71614	0.0911299	0.838437	0.326681	0.374711	1.00327	0.31963	0.809684
EME2	0.411597	1.4271	1.71463	0.091413	0.838437	-0.152506	1.4271	-0.837372	0.405767	0.843328
MEG8	-0.987559	0.382739	-1.76406	0.0911803	0.838437	-0.381021	0.382739	-0.550063	0.585215	0.900129
AP000894.2	0.56861	2.03158	1.786	0.0912824	0.838437	0.120445	2.03158	0.259304	0.796488	0.955427
MPRIP	0.278511	4.64673	1.71648	0.0910713	0.838437	-0.00944987	4.64673	-0.0759011	0.939753	0.985505
CLPP	-0.179501	6.40451	-1.72074	0.0912961	0.838437	0.00433597	6.40451	0.0410576	0.967399	0.992568
AC009812.4	0.618586	-0.200037	1.70731	0.093532	0.838714	0.685295	-0.200037	1.69763	0.0947262	0.74447
AC138409.2	0.6186	1.04366	1.69235	0.0965828	0.838714	0.640838	1.04366	1.92938	0.0597129	0.74447
ACSS1	-1.64449	-1.02624	-1.70838	0.0925855	0.838714	1.28777	-1.02624	2.28174	0.0283749	0.74447
AL137786.1	-0.691376	-0.532037	-1.71684	0.0949517	0.838714	-1.57548	-0.532037	-2.13489	0.0367549	0.74447
ANK1	0.591571	2.90818	1.68925	0.0970014	0.838714	-0.581463	2.90818	-1.74327	0.0871295	0.74447
ANLN	-0.619937	3.9825	-1.67825	0.0985485	0.838714	-0.422107	3.9825	-2.12677	0.0489014	0.74447
AXL	0.626202	3.64701	1.68772	0.0966063	0.838714	-0.394069	3.64701	-1.95191	0.0646668	0.74447
CWF19L2	0.291203	2.972	1.70739	0.0927844	0.838714	0.26654	2.972	2.11388	0.0390945	0.74447
GATM	-0.369708	6.29941	-1.70235	0.0969955	0.838714	0.333648	6.29941	1.87071	0.0750537	0.74447
GK	-0.214628	4.57379	-1.68471	0.0986142	0.838714	-0.186558	4.57379	-1.62938	0.111019	0.74447
IL15	-1.16144	0.335073	-1.70209	0.0941024	0.838714	-0.692976	0.335073	-1.74414	0.0976977	0.74447
MBTD1	0.320493	3.93986	1.71642	0.0944563	0.838714	0.49899	3.93986	2.84824	0.00758809	0.74447
MEI4	-0.975236	-0.891375	-1.71986	0.099001	0.838714	-1.96227	-0.891375	-2.18012	0.0332733	0.74447
MGA	0.197234	6.34561	1.69119	0.097109	0.838714	0.249825	6.34561	2.31982	0.0249214	0.74447
NAA35	0.127772	5.91297	1.70001	0.0948514	0.838714	0.181848	5.91297	2.57804	0.012747	0.74447
ODR4	0.219036	5.15551	1.70612	0.0934481	0.838714	0.186551	5.15551	1.77126	0.0830492	0.74447
PIP4K2A	0.326242	4.73826	1.70077	0.0952403	0.838714	-0.310784	4.73826	-1.63614	0.10798	0.74447
PRPS2	0.54048	1.99142	1.7099	0.0932304	0.838714	-0.364196	1.99142	-1.69513	0.10461	0.74447
RESF1	0.296838	5.17147	1.74092	0.0935861	0.838714	0.363826	5.17147	2.25181	0.0346312	0.74447
SLC35B2	-0.174799	6.54616	-1.72059	0.0945459	0.838714	-0.233065	6.54616	-2.46491	0.0200852	0.74447
SNRPD1	0.161147	6.72174	1.69344	0.0955026	0.838714	-0.146006	6.72174	-1.61932	0.110514	0.74447
TTC4	-0.358445	1.4243	-1.71131	0.0920229	0.838714	-0.348886	1.4243	-1.65032	0.103936	0.74447
UBE2Q2P1	0.453967	1.45227	1.70988	0.0926914	0.838714	0.332823	1.45227	1.57586	0.122065	0.74447
UROS	0.181797	7.09338	1.68512	0.0982584	0.838714	-0.188504	7.09338	-1.80554	0.0770871	0.74447
USP3	0.251833	5.67434	1.75961	0.0952436	0.838714	0.266887	5.67434	1.85324	0.0796122	0.74447
ZBED8	0.182042	5.06432	1.70749	0.096811	0.838714	0.311151	5.06432	2.86164	0.00687607	0.74447
ZC3H6	0.325071	3.58393	1.71113	0.0935977	0.838714	0.384138	3.58393	2.19009	0.034017	0.74447
CDC6	-1.03005	2.40015	-1.68492	0.0970849	0.838714	-0.449702	2.40015	-1.60367	0.13264	0.746138
RNF4	0.129213	6.77569	1.70931	0.0924549	0.838714	-0.101514	6.77569	-1.51732	0.134365	0.74775
RTN3P1	-0.382642	1.83859	-1.69198	0.0959283	0.838714	0.361441	1.83859	1.48862	0.141662	0.751127
BRD7P2	-0.898639	-0.38735	-1.70669	0.0928846	0.838714	-0.491533	-0.38735	-1.429	0.158022	0.752666
MAMLD1	0.579746	3.77596	1.69574	0.0949751	0.838714	-0.280669	3.77596	-1.42961	0.15906	0.752666
PLA2G4A	-1.20156	0.11131	-1.70018	0.0943805	0.838714	-0.365273	0.11131	-1.4671	0.150023	0.752666
ZNF845	0.249211	4.47505	1.67675	0.0991689	0.838714	0.223551	4.47505	1.47608	0.145219	0.752666
SNX29	0.306064	3.76399	1.69739	0.0956791	0.838714	0.218469	3.76399	1.42037	0.16316	0.752703
OFD1	0.212768	4.22478	1.69989	0.0945481	0.838714	0.142122	4.22478	1.38496	0.172465	0.755544
GPX8	-1.25453	2.5835	-1.70049	0.0941055	0.838714	-0.383311	2.5835	-1.41253	0.176675	0.755938
HECTD2	0.332822	5.64787	1.68427	0.0990829	0.838714	-0.245399	5.64787	-1.36023	0.18166	0.756167
ORC4	0.193478	7.37468	1.69524	0.0976639	0.838714	0.153541	7.37468	1.35078	0.183989	0.757758
AHNAK2	0.744228	3.03915	1.69362	0.0977882	0.838714	-0.508847	3.03915	-1.34459	0.189107	0.760424
AC073593.2	-0.820294	-0.393873	-1.71282	0.0917433	0.838714	0.433177	-0.393873	1.31919	0.191956	0.760902
BCL11A	0.728926	4.33516	1.75268	0.0926676	0.838714	0.525671	4.33516	1.32221	0.200649	0.762421
MTCYBP18	0.862112	0.146984	1.70355	0.0951167	0.838714	0.587718	0.146984	1.30495	0.19974	0.762421
SHH	1.48076	0.267663	1.67242	0.0995752	0.838714	-0.473339	0.267663	-1.32929	0.195256	0.762421
TCEAL6	-0.764744	-0.25939	-1.74086	0.093124	0.838714	-0.678545	-0.25939	-1.27833	0.207663	0.764527
RO60	0.197784	7.90317	1.70328	0.0951237	0.838714	0.137683	7.90317	1.26532	0.212485	0.766649
CCDC146	-0.837683	1.00641	-1.68642	0.0974355	0.838714	0.377363	1.00641	1.28692	0.21774	0.768545
QTRT2	0.238046	4.19171	1.73243	0.0932351	0.838714	-0.172467	4.19171	-1.2611	0.216661	0.768545
NVL	0.187965	5.44254	1.68543	0.0969972	0.838714	-0.124324	5.44254	-1.22939	0.223619	0.769628
RABIF	0.172793	5.88799	1.70523	0.0990076	0.838714	0.131798	5.88799	1.24227	0.222809	0.769628
RHBDF1	-1.00564	2.06126	-1.67375	0.0995883	0.838714	-0.223995	2.06126	-1.22702	0.227874	0.771888
CSPP1	0.265502	4.40691	1.68836	0.0981431	0.838714	0.151427	4.40691	1.21641	0.234498	0.776218
GPR1	1.09336	-0.178706	1.70697	0.0928799	0.838714	-0.373578	-0.178706	-1.24141	0.234021	0.776218
LPIN3	-0.850299	0.90232	-1.69259	0.0969537	0.838714	-0.430666	0.90232	-1.18735	0.247636	0.784406
UBXN2A	0.226153	4.91786	1.71426	0.0915798	0.838714	0.114267	4.91786	1.1639	0.249976	0.785332
AC104563.1	-0.304682	2.91438	-1.68848	0.0963431	0.838714	0.198654	2.91438	1.13133	0.262274	0.791528
PDE7B	-1.23099	1.95502	-1.70704	0.0933345	0.838714	-0.438053	1.95502	-1.19016	0.262418	0.791528
TUBB3	-0.429382	2.24432	-1.69202	0.0980964	0.838714	0.333142	2.24432	1.13719	0.260403	0.791528
DIRAS2	-0.247397	6.49544	-1.7091	0.0932385	0.838714	-0.145153	6.49544	-1.07208	0.288672	0.798861
PCSK5	-0.843266	3.83062	-1.69494	0.0968796	0.838714	-0.350773	3.83062	-1.10381	0.291013	0.798861
AC141586.1	0.345955	2.65273	1.69919	0.0942963	0.838714	0.133296	2.65273	1.03216	0.306005	0.804349
AL031729.1	-0.51129	0.504704	-1.68438	0.0974545	0.838714	0.317006	0.504704	1.02243	0.310606	0.806142
PPP1R18	0.371877	3.71209	1.67873	0.0988089	0.838714	-0.195348	3.71209	-1.01486	0.315154	0.808719
MT-ND1	0.349224	8.80716	1.71208	0.0927885	0.838714	0.19268	8.80716	1.01131	0.316728	0.809597
AC026271.1	0.290626	4.61687	1.70806	0.0926285	0.838714	-0.151117	4.61687	-0.992319	0.324899	0.809684
PCDH18	-1.34179	2.76292	-1.67331	0.0995545	0.838714	0.242354	2.76292	1.02311	0.318871	0.809684
RNASET2	-0.350268	3.08577	-1.69249	0.0956458	0.838714	0.156576	3.08577	0.99485	0.324275	0.809684
ZNF442	0.19553	3.55401	1.72573	0.0925156	0.838714	-0.167226	3.55401	-0.963956	0.338831	0.812155
HNRNPL	0.457196	5.28396	1.69276	0.0955667	0.838714	-0.202848	5.28396	-0.956558	0.342843	0.813775
SIL1	-0.405836	4.84029	-1.73476	0.0977201	0.838714	-0.202252	4.84029	-0.976985	0.346017	0.815192
SLC25A24	0.470353	4.98718	1.70034	0.0982257	0.838714	-0.262223	4.98718	-0.935117	0.355918	0.819139
ZNF75D	-0.30321	3.88538	-1.70371	0.094758	0.838714	0.154911	3.88538	0.91802	0.363227	0.822783
NFATC1	1.44101	-0.320228	1.71149	0.0921589	0.838714	0.434634	-0.320228	0.925964	0.365126	0.8234
YEATS4	0.207033	4.8506	1.70698	0.0950488	0.838714	-0.101129	4.8506	-0.909188	0.369169	0.824581
USP21	0.26264	4.65542	1.67317	0.0994384	0.838714	0.104402	4.65542	0.898146	0.373453	0.824821
KHNYN	-0.326793	4.0146	-1.68382	0.0972541	0.838714	-0.108358	4.0146	-0.867852	0.389138	0.834045
AL162151.2	-0.495116	0.163088	-1.69008	0.0963623	0.838714	0.248094	0.163088	0.860852	0.392738	0.837081
FCHO2	0.324762	3.83952	1.72206	0.0918169	0.838714	0.143761	3.83952	0.853702	0.398666	0.839593
TMEM50A	0.124538	7.69403	1.7005	0.0944758	0.838714	-0.0601752	7.69403	-0.832136	0.408695	0.844929
AP1AR	0.248206	5.7303	1.70199	0.0962199	0.838714	0.127689	5.7303	0.819688	0.416317	0.845893
AKT3	0.27633	5.33509	1.72986	0.0948185	0.838714	0.125139	5.33509	0.818553	0.420916	0.8477
DDAH2	-0.245801	7.30287	-1.70263	0.0974142	0.838714	-0.113864	7.30287	-0.806549	0.425468	0.849803
UNC45A	-0.262637	5.98063	-1.72872	0.093991	0.838714	-0.106574	5.98063	-0.809701	0.42785	0.851045
NUP93	-0.268825	7.40962	-1.71771	0.0977512	0.838714	-0.120662	7.40962	-0.801844	0.430753	0.853228
POU4F2	1.05017	1.23191	1.70502	0.0979068	0.838714	-0.638574	1.23191	-0.781502	0.437789	0.855534
TEPSIN	0.406903	1.11779	1.68245	0.0975123	0.838714	-0.173472	1.11779	-0.773388	0.442232	0.855573
SLC5A7	-0.716542	2.36829	-1.81326	0.0956252	0.838714	-0.631811	2.36829	-0.744867	0.459216	0.861685
LRRC4C	0.412661	4.70522	1.67461	0.0990881	0.838714	-0.133246	4.70522	-0.703045	0.484925	0.869891
SCAP	-0.218212	7.19968	-1.68919	0.0970436	0.838714	-0.0844563	7.19968	-0.701924	0.48592	0.869994
NR5A2	0.602332	1.09454	1.73843	0.0978407	0.838714	-0.628893	1.09454	-0.677213	0.500845	0.876332
PPP1R17	-0.548615	6.12706	-1.74487	0.0941537	0.838714	-0.262581	6.12706	-0.678309	0.501295	0.876663
CHMP2A	-0.182369	6.85902	-1.67853	0.0987461	0.838714	0.0656619	6.85902	0.664587	0.509122	0.877987
SNRPFP1	-0.485671	0.063266	-1.67697	0.0988319	0.838714	-0.184721	0.063266	-0.662857	0.509955	0.877987
TYW1	-0.180673	4.78356	-1.6732	0.0993272	0.838714	0.0552459	4.78356	0.663795	0.509283	0.877987
GAL	-1.69415	2.97979	-1.80407	0.0978833	0.838714	-0.939553	2.97979	-0.650992	0.518509	0.880932
MIR4453HG	0.342759	4.56951	1.74097	0.0928881	0.838714	0.141613	4.56951	0.640628	0.525544	0.883248
HS3ST4	-1.08615	0.570284	-1.70035	0.0940775	0.838714	-0.342001	0.570284	-0.608051	0.545375	0.889441
TRPC3	-0.740984	1.43598	-1.69456	0.0979798	0.838714	-0.274975	1.43598	-0.593592	0.555663	0.894458
CIAO2B	-0.225683	6.53924	-1.70794	0.093204	0.838714	-0.0777946	6.53924	-0.590854	0.556912	0.895087
SLC13A3	0.49863	1.57633	1.7005	0.094566	0.838714	0.115374	1.57633	0.563095	0.577537	0.897587
YIPF2	-0.216013	4.20701	-1.70399	0.094759	0.838714	-0.0592545	4.20701	-0.563335	0.576864	0.897587
RNF43	-1.83966	-1.97282	-1.70976	0.0942258	0.838714	-0.43622	-1.97282	-0.547445	0.590193	0.901109
ABCA8	-1.19783	3.70395	-1.71965	0.0918596	0.838714	-0.216505	3.70395	-0.544565	0.599113	0.903774
EIF3K	-0.23093	6.72957	-1.71156	0.0940058	0.838714	0.0694338	6.72957	0.513587	0.60999	0.908108
IQCH	-0.344181	3.14042	-1.7168	0.0926118	0.838714	-0.0794964	3.14042	-0.514167	0.611535	0.909034
TMEM208	-0.217894	6.35358	-1.721	0.093251	0.838714	-0.0610801	6.35358	-0.506413	0.615692	0.909167
B4GALT7	-0.219393	4.9958	-1.70154	0.0943627	0.838714	-0.0559721	4.9958	-0.500965	0.618586	0.909675
ZNF674-AS1	0.27601	3.48951	1.68844	0.0971616	0.838714	-0.0865268	3.48951	-0.484685	0.629672	0.914211
AC027682.6	-0.621005	0.174417	-1.69105	0.0981511	0.838714	0.191706	0.174417	0.482164	0.631748	0.914883
TMED1	-0.27718	3.68091	-1.68273	0.0981521	0.838714	-0.0552313	3.68091	-0.481868	0.633895	0.915427
EIF3C	-0.345336	4.92042	-1.70291	0.096033	0.838714	-0.0951181	4.92042	-0.477467	0.635518	0.915918
TOM1	-0.181534	5.67978	-1.70983	0.0933938	0.838714	0.0437587	5.67978	0.473334	0.638426	0.916002
LINC00645	-0.820124	3.02314	-1.69292	0.0960324	0.838714	-0.137591	3.02314	-0.476518	0.639702	0.916298
HPS1	-0.369892	5.48583	-1.69105	0.0990751	0.838714	-0.0867149	5.48583	-0.468122	0.643894	0.918375
PTPMT1	-0.322339	3.62058	-1.69095	0.0961452	0.838714	-0.070924	3.62058	-0.462379	0.645845	0.918591
NYNRIN	-0.431885	3.87022	-1.67691	0.098612	0.838714	-0.0799878	3.87022	-0.460205	0.647373	0.919107
AC069218.1	-0.474533	0.313274	-1.67474	0.0990226	0.838714	-0.144264	0.313274	-0.459477	0.647499	0.919205
SLC35B4	-0.147008	7.01701	-1.69886	0.0974688	0.838714	-0.0392557	7.01701	-0.457499	0.64986	0.919584
AC107027.3	0.400808	1.14913	1.68965	0.0972859	0.838714	0.152338	1.14913	0.441064	0.660709	0.92207
NDUFA3	-0.266461	5.98188	-1.6862	0.0967846	0.838714	0.0677791	5.98188	0.42149	0.674855	0.926639
ETV6	0.569293	3.52906	1.67547	0.0990334	0.838714	0.0675381	3.52906	0.413198	0.681124	0.927771
THAP9-AS1	0.481226	4.71854	1.71636	0.09317	0.838714	-0.102953	4.71854	-0.391686	0.697385	0.931897
ZNF85	0.416981	4.58532	1.74503	0.0946567	0.838714	-0.0989035	4.58532	-0.376816	0.708914	0.935766
HSF1	0.450357	4.49997	1.68339	0.0978639	0.838714	-0.0794085	4.49997	-0.374445	0.709964	0.936172
ZNF474	-1.16187	0.402245	-1.68477	0.0973278	0.838714	-0.0844909	0.402245	-0.365508	0.7169	0.938318
RPL21P18	0.648667	-0.120973	1.67959	0.0980695	0.838714	0.137373	-0.120973	0.36238	0.718301	0.938658
RPS7P10	-0.471984	0.641362	-1.68407	0.0971971	0.838714	0.10041	0.641362	0.35228	0.725823	0.940064
CYB5R2	-1.27215	0.421584	-1.73595	0.0971667	0.838714	-0.262374	0.421584	-0.312183	0.756895	0.948352
EXOC5	0.201412	7.88467	1.6818	0.0979526	0.838714	0.0315195	7.88467	0.271118	0.787237	0.953361
CBWD2	0.138026	5.70217	1.67921	0.0993998	0.838714	-0.0173818	5.70217	-0.220052	0.826744	0.961431
TAF5	0.389916	3.2194	1.69916	0.0973361	0.838714	0.0444665	3.2194	0.200785	0.841975	0.965922
TEAD2	-1.197	0.832501	-1.68043	0.0983855	0.838714	0.035679	0.832501	0.198402	0.843588	0.966223
FBXO6	-0.613353	1.72197	-1.72228	0.0961874	0.838714	0.0709768	1.72197	0.198985	0.84369	0.966259
SNHG19	-0.546246	0.871435	-1.70826	0.0927258	0.838714	0.058892	0.871435	0.193817	0.846962	0.966697
MRPS26	-0.17315	6.10069	-1.67685	0.0986665	0.838714	-0.0170476	6.10069	-0.176759	0.860276	0.969229
DECR1	-0.461756	6.05688	-1.71068	0.0962008	0.838714	-0.0370892	6.05688	-0.169085	0.867594	0.970929
IVD	-0.276358	6.15678	-1.67945	0.099401	0.838714	0.0224981	6.15678	0.168932	0.866891	0.970929
FAM76A	-0.285949	4.38449	-1.69929	0.0943565	0.838714	-0.0210846	4.38449	-0.166381	0.868493	0.971397
LINC01918	0.673105	0.213729	1.71659	0.0923362	0.838714	-0.107432	0.213729	-0.16198	0.871855	0.972267
FAIM2	-0.482354	6.08728	-1.70673	0.0968285	0.838714	0.0480098	6.08728	0.153194	0.878921	0.974044
NEURL1B	0.788918	1.40808	1.69289	0.0956599	0.838714	-0.0493303	1.40808	-0.15091	0.880788	0.974219
RPL41	0.156089	7.24616	1.69951	0.0942348	0.838714	-0.0131886	7.24616	-0.147649	0.883099	0.974647
TSG101	0.12611	7.72825	1.70295	0.0937241	0.838714	-0.0104885	7.72825	-0.145019	0.885171	0.9749
ACADM	0.155923	6.2815	1.68283	0.0984567	0.838714	0.00996039	6.2815	0.113811	0.909843	0.981729
CERNA1	-0.446937	1.26504	-1.69769	0.0957973	0.838714	-0.0255077	1.26504	-0.101629	0.919462	0.98319
RPL13AP25	-0.445097	1.85646	-1.69567	0.0955759	0.838714	0.0250582	1.85646	0.0910213	0.927779	0.98468
ARSA	0.438496	3.40499	1.69374	0.0953378	0.838714	0.0120257	3.40499	0.0837114	0.933691	0.984857
NDUFS8	-0.265895	7.39478	-1.68132	0.0992467	0.838714	-0.0105662	7.39478	-0.0701198	0.944403	0.986657
TARS2	-0.191699	5.15992	-1.68258	0.0981704	0.838714	-0.00620506	5.15992	-0.0605045	0.951992	0.988935
ZBTB38	0.199834	6.03051	1.69646	0.0984675	0.838714	0.00636497	6.03051	0.0574251	0.954571	0.989114
HAX1	0.19523	6.87259	1.73013	0.0924128	0.838714	0.0051193	6.87259	0.0456886	0.963815	0.992241
INTS6	0.20313	5.64176	1.69448	0.0953641	0.838714	0.00461743	5.64176	0.0442185	0.964883	0.992497
CHRM3	-0.69318	4.1656	-1.69941	0.0944644	0.838714	0.0124206	4.1656	0.0417282	0.966907	0.992568
TPM3P9	0.419007	2.67082	1.69253	0.0959069	0.838714	-0.00506911	2.67082	-0.0226802	0.981986	0.995498
AC129492.1	-0.420189	4.29737	-1.67998	0.0989265	0.838714	0.00353966	4.29737	0.0170478	0.986486	0.996451
FAM131A	-0.307314	5.29705	-1.7473	0.0930467	0.838714	0.00150507	5.29705	0.00921325	0.992743	0.998116
MITF	-1.15198	-0.568154	-1.67187	0.0995911	0.838714	-0.00336389	-0.568154	-0.00869033	0.993113	0.99824
PARS2	-0.226685	3.35782	-1.67173	0.0996775	0.838841	0.270533	3.35782	2.03753	0.0458713	0.74447
ZNF91	0.297685	7.26569	1.71381	0.0999103	0.838841	0.363602	7.26569	2.15	0.0430851	0.74447
SPG21	0.329281	7.25592	1.6715	0.0997656	0.838841	-0.272469	7.25592	-1.41661	0.161626	0.752666
SLC12A9	-0.248134	3.46764	-1.67146	0.0998848	0.838841	-0.145614	3.46764	-1.14593	0.256707	0.788574
MAD2L2	-0.198231	6.50873	-1.68297	0.0998322	0.838841	-0.0840446	6.50873	-0.734724	0.466701	0.864454
TMX2P1	-0.382946	1.54443	-1.67168	0.0999464	0.838841	-0.0967296	1.54443	-0.446659	0.656755	0.921371
NTS	-1.25196	2.65543	-1.71619	0.0999695	0.838841	0.091479	2.65543	0.111631	0.911802	0.98182
AC026471.1	0.603328	0.209066	1.67585	0.100047	0.839053	0.2395	0.209066	0.719944	0.475244	0.867113
LINC01503	0.663514	1.81775	1.67082	0.100124	0.839268	-0.330893	1.81775	-1.29381	0.206663	0.764527
TMEM231	-0.276665	5.61392	-1.71371	0.10029	0.840224	0.314605	5.61392	2.09009	0.051142	0.74447
LCOR	0.199136	7.24289	1.7057	0.100509	0.841424	0.0934995	7.24289	0.748653	0.459687	0.862134
ALG11	0.228634	4.88327	1.67011	0.100538	0.841424	0.0612376	4.88327	0.533246	0.596445	0.903049
TELO2	-0.200043	5.12878	-1.66949	0.10075	0.84249	-0.197795	5.12878	-1.84495	0.0709602	0.74447
COL21A1	-1.89196	0.534433	-1.68049	0.100769	0.84249	-0.683303	0.534433	-0.927766	0.375582	0.824821
EXOG	0.13622	5.20553	1.66552	0.10108	0.844211	0.180791	5.20553	1.96847	0.0534921	0.74447
DDX60	-1.54882	0.659716	-1.66659	0.101055	0.844211	-0.334638	0.659716	-1.15269	0.254774	0.787568
KIZ	0.247174	3.62273	1.66779	0.101185	0.84451	0.290448	3.62273	1.85091	0.0691782	0.74447
CLN8	-0.294617	4.63062	-1.66862	0.10122	0.84451	0.0548043	4.63062	0.37817	0.707415	0.935341
AC120036.4	0.666139	-0.757499	1.68355	0.101464	0.84529	-1.23174	-0.757499	-1.69216	0.0956918	0.74447
PSPN	-0.469833	1.09204	-1.66464	0.101376	0.84529	0.246918	1.09204	1.05929	0.29456	0.798861
SLC41A3	-0.155632	6.23681	-1.66251	0.10168	0.84529	0.0861619	6.23681	1.02772	0.308352	0.805442
ZNF799	-0.249541	3.05324	-1.66898	0.101618	0.84529	-0.134448	3.05324	-0.934727	0.354638	0.818896
FOXO1	-0.972626	1.95161	-1.66162	0.101637	0.84529	0.254616	1.95161	0.825667	0.41462	0.845083
UBQLN1	0.131653	7.30896	1.66327	0.101488	0.84529	-0.0338899	7.30896	-0.446408	0.656891	0.921449
RMND5B	-0.136858	5.63626	-1.6678	0.101659	0.84529	-0.0286046	5.63626	-0.393193	0.696168	0.931608
HNF4G	-0.943319	-0.516404	-1.6608	0.101913	0.846608	0.328124	-0.516404	1.22176	0.227865	0.771888
GAS2L3	-0.682138	4.86341	-1.66172	0.101943	0.846608	-0.321039	4.86341	-1.11047	0.274208	0.796883
AC108449.2	0.251038	3.49528	1.65478	0.104377	0.847079	0.255967	3.49528	1.90209	0.0642276	0.74447
KMT2E	0.239813	7.20172	1.69195	0.102344	0.847079	0.237331	7.20172	1.77214	0.0898967	0.74447
MMS19	-0.167136	6.8745	-1.65317	0.103996	0.847079	-0.14749	6.8745	-1.57368	0.121498	0.74447
MRNIP	0.25059	3.75737	1.65821	0.103715	0.847079	0.24209	3.75737	1.99574	0.0547938	0.74447
PARVB	-0.334229	1.15948	-1.67177	0.102971	0.847079	0.696082	1.15948	2.06946	0.0426773	0.74447
RCE1	-0.181808	4.18857	-1.66105	0.102841	0.847079	-0.208517	4.18857	-1.88431	0.0648954	0.74447
RF00019	0.323358	3.48164	1.66291	0.102092	0.847079	0.408257	3.48164	2.45486	0.0179483	0.74447
ZNF14	0.2161	5.03263	1.70411	0.102826	0.847079	0.306478	5.03263	2.39192	0.0255357	0.74447
EIF4EP2	-0.215917	2.47549	-1.65712	0.102547	0.847079	0.21908	2.47549	1.55701	0.124558	0.744994
ERICH6-AS1	-0.484109	1.30165	-1.67337	0.102586	0.847079	-0.437239	1.30165	-1.53782	0.132566	0.746138
OSMR	-1.39073	2.34695	-1.65819	0.10234	0.847079	-0.496358	2.34695	-1.58495	0.140097	0.749732
AC025034.1	0.536508	0.705486	1.65316	0.103558	0.847079	0.491336	0.705486	1.46864	0.147006	0.752666
SLC27A5	-0.244535	3.38273	-1.65067	0.103903	0.847079	0.174854	3.38273	1.41269	0.162891	0.752666
UTP11	0.181148	5.7413	1.65661	0.104189	0.847079	-0.15879	5.7413	-1.43987	0.156099	0.752666
AF131215.6	0.387627	0.999321	1.65412	0.103157	0.847079	0.312103	0.999321	1.41025	0.163465	0.752703
PCDHGA11	-1.27396	1.03192	-1.66823	0.103879	0.847079	1.20956	1.03192	1.35516	0.181329	0.755938
TTC12	-0.469084	2.97089	-1.65333	0.104098	0.847079	-0.260249	2.97089	-1.23851	0.224803	0.769628
THAP7	-0.17126	4.639	-1.65626	0.102848	0.847079	0.106881	4.639	1.14837	0.255366	0.787568
SYNCRIP	0.140495	6.94501	1.65331	0.103498	0.847079	-0.0901585	6.94501	-1.14176	0.258088	0.789819
SPATA6L	-0.465738	1.48492	-1.64789	0.104435	0.847079	0.251944	1.48492	1.14034	0.258596	0.790121
DPY19L2	0.344906	2.79723	1.65819	0.103359	0.847079	-0.203175	2.79723	-1.07513	0.28783	0.798861
PLIN2	0.556479	3.56583	1.65022	0.104115	0.847079	-0.163505	3.56583	-1.05781	0.295717	0.798861
COQ6	-0.197303	3.52659	-1.65848	0.104395	0.847079	0.117426	3.52659	1.04579	0.301909	0.80233
DYRK4	-0.340888	4.25143	-1.65603	0.103957	0.847079	-0.173466	4.25143	-1.03265	0.30884	0.80583
LINC02301	-1.26368	-0.208416	-1.65276	0.103437	0.847079	-0.438222	-0.208416	-0.940503	0.352326	0.818352
SNAP25-AS1	-0.496279	1.13839	-1.65618	0.103621	0.847079	0.32556	1.13839	0.914686	0.363911	0.823171
GSS	-0.24307	6.24937	-1.69327	0.104269	0.847079	-0.12035	6.24937	-0.902369	0.379093	0.826988
ZNF692	0.403905	3.72063	1.65831	0.102475	0.847079	0.0976186	3.72063	0.827893	0.411379	0.844929
RPL39	0.214081	6.24689	1.65243	0.103879	0.847079	0.102412	6.24689	0.778737	0.439175	0.855573
HAS2-AS1	-1.17667	-0.983689	-1.65746	0.102565	0.847079	-0.269073	-0.983689	-0.746157	0.459183	0.861685
MYL6	-0.223212	10.2214	-1.65672	0.102882	0.847079	-0.0933086	10.2214	-0.7297	0.468436	0.86501
MFSD3	-0.351427	4.47243	-1.65692	0.103185	0.847079	-0.114865	4.47243	-0.71644	0.478336	0.86766
ALOX15P1	-0.716184	-0.52443	-1.66651	0.104463	0.847079	0.435077	-0.52443	0.667057	0.507226	0.877987
OAZ3	-0.583266	-0.0646658	-1.64852	0.104434	0.847079	0.192204	-0.0646658	0.565866	0.573543	0.897587
AL133338.1	-0.31594	2.27189	-1.6616	0.104072	0.847079	-0.10746	2.27189	-0.543168	0.589567	0.901109
RPF2	0.231476	5.36006	1.66499	0.102997	0.847079	-0.0585511	5.36006	-0.428146	0.670604	0.924682
PDCL	0.16038	5.53	1.66737	0.103867	0.847079	-0.036994	5.53	-0.407771	0.686074	0.92838
SLC31A1	-0.267853	5.55271	-1.66131	0.104176	0.847079	-0.0560581	5.55271	-0.409128	0.685534	0.92838
STAC	-0.805182	3.06749	-1.71437	0.103553	0.847079	-0.207115	3.06749	-0.405667	0.688523	0.929126
SUGCT	-0.61228	1.63613	-1.65971	0.102177	0.847079	-0.0498157	1.63613	-0.293762	0.770334	0.951568
MRPL19	0.171383	5.89834	1.66357	0.102469	0.847079	-0.0228417	5.89834	-0.260237	0.796065	0.955356
MRPL52	-0.209051	5.65074	-1.65879	0.1027	0.847079	0.0301636	5.65074	0.234957	0.815048	0.959305
C1D	-0.291571	4.89293	-1.68404	0.103124	0.847079	0.0293915	4.89293	0.162657	0.87178	0.972267
AC022433.1	-0.74286	0.480064	-1.76799	0.103485	0.847079	-0.104679	0.480064	-0.128694	0.898045	0.979075
CD109	-1.12413	0.63901	-1.65462	0.103329	0.847079	-0.0208847	0.63901	-0.086482	0.931568	0.984857
LGALSL	0.221414	5.95929	1.67937	0.104228	0.847079	0.00837336	5.95929	0.0607314	0.951943	0.988935
DCTN3	-0.161188	7.39312	-1.66223	0.102214	0.847079	-0.00181144	7.39312	-0.0185813	0.98524	0.99594
ACADSB	-0.3368	5.04775	-1.66384	0.104569	0.847516	0.146044	5.04775	0.744515	0.461454	0.862398
AL138799.1	-0.677305	-1.59836	-1.64562	0.104902	0.848491	-1.39123	-1.59836	-2.19173	0.0321638	0.74447
ZFP90	0.131366	6.65092	1.65146	0.104937	0.848491	0.0739902	6.65092	0.935995	0.35358	0.818538
LDLRAP1	-1.45292	0.250103	-1.64568	0.104937	0.848491	-0.325853	0.250103	-0.923957	0.366825	0.823919
SPATA13	-0.497496	3.44852	-1.64582	0.104952	0.848491	0.0546136	3.44852	0.335997	0.740162	0.943728
[truncated: 14,163 more rows]

## Sheet: PTSD response profiles
Supplemental Table 2. PTSD+ and PTSD- transcriptional responses to dexamethasone conditioning.
	PTSD- 2.5nM DEX				PTSD- 5nM DEX				PTSD- 50nM DEX				PTSD_ 2.5nM DEX				PTSD+ 5nM DEX				PTSD+ 50nM DEX
Gene symbol	logFC	t	P.Value	adj.P.Val	logFC	t	P.Value	adj.P.Val	logFC	t	P.Value	adj.P.Val	logFC	t	P.Value	adj.P.Val	logFC	t	P.Value	adj.P.Val	logFC	t	P.Value	adj.P.Val
A2ML1	-0.363121	-1.59253	0.120335	0.418507	-0.0683053	-0.29261	0.771562	0.971056	-0.674485	-2.71754	0.0101906	0.0862554	-0.132108	-0.542965	0.590624	0.999971	-0.765338	-3.32654	0.00208767	0.0688096	-0.47023	-1.90574	0.0649948	0.210079
AAGAB	0.268641	1.20415	0.23668	0.513301	0.307983	1.34845	0.186249	0.866706	0.749835	3.08775	0.00395197	0.0603748	0.21466	0.901709	0.373428	0.999971	0.623224	2.76858	0.00897302	0.0927721	0.844044	3.49616	0.001312	0.0247198
AATF	0.257241	1.65288	0.107375	0.40752	0.0456374	0.286433	0.77625	0.971783	0.507336	2.99479	0.00503889	0.0661451	0.158926	0.956981	0.345197	0.999971	0.461667	2.93991	0.00580692	0.0838481	0.56044	3.32774	0.0020809	0.0315197
ABCC1	0.507253	2.37389	0.0232703	0.321496	0.559662	2.55835	0.0150428	0.638565	0.841808	3.61922	0.000931781	0.0388724	0.179233	0.786067	0.437163	0.999971	0.831557	3.85683	0.00047597	0.0599736	0.780128	3.37379	0.00183591	0.0295026
ABCC13	-0.392981	-1.6544	0.107064	0.407307	-0.360046	-1.48056	0.147746	0.848023	-0.737388	-2.85189	0.00727272	0.0752931	0.0696727	0.274877	0.785041	0.999971	-0.38757	-1.61705	0.114924	0.272553	-0.30967	-1.20472	0.236463	0.433592
ABCF1	0.21538	1.11166	0.273926	0.543204	0.22379	1.12825	0.266953	0.890224	0.732254	3.47213	0.00140197	0.0437662	0.244855	1.18436	0.24432	0.999971	0.726112	3.71428	0.000713384	0.0608829	0.92593	4.41635	9.34883e-05	0.0070533
ABL2	0.878329	2.78965	0.00851115	0.300887	0.896326	2.78071	0.00870422	0.60194	1.18052	3.44456	0.00151253	0.0446334	0.238318	0.70934	0.482853	0.999971	0.968971	3.05004	0.00436303	0.0789784	1.03633	3.04163	0.00446004	0.0474261
ABO	-0.818616	-3.40815	0.00167142	0.249754	-0.511769	-2.08118	0.0448629	0.745122	-0.79747	-3.05014	0.00436192	0.0625683	-0.0711118	-0.277451	0.78308	0.999971	-0.406797	-1.67849	0.102236	0.25595	-0.554703	-2.1341	0.0399789	0.160501
AC002539.1	-1.16263	-3.39626	0.00172667	0.249754	-1.20157	-3.42851	0.00158067	0.459307	-1.09595	-2.94116	0.00578835	0.0694639	0.320338	0.876948	0.386546	0.999971	-0.420581	-1.21762	0.231584	0.407418	-0.330581	-0.892389	0.378331	0.57118
AC003088.1	-0.474899	-1.31171	0.198231	0.48179	-0.09217	-0.24867	0.805082	0.976871	-1.22383	-3.10544	0.00377203	0.0596054	0.805027	2.08378	0.044611	0.999971	0.0260334	0.071264	0.943597	0.968236	-0.14017	-0.357774	0.72268	0.83343
AC004895.4	-0.767758	-3.40195	0.00169998	0.249754	-0.424154	-1.8358	0.0749679	0.7899	-0.56109	-2.28404	0.0286031	0.13184	0.0324125	0.134593	0.893711	0.999971	-0.243095	-1.06754	0.2931	0.470491	-0.329876	-1.35074	0.185521	0.376074
AC005235.1	-0.517361	-1.45616	0.154338	0.446391	-0.277734	-0.763557	0.450291	0.923264	-0.591222	-1.52874	0.135395	0.289691	-0.485116	-1.27958	0.209183	0.999971	-0.8217	-2.29209	0.0280841	0.138459	-0.437869	-1.13888	0.262556	0.460098
AC005307.1	-0.862184	-2.64227	0.0122684	0.308001	0.0327847	0.0981403	0.922386	0.991071	-0.284227	-0.800223	0.429026	0.586953	0.223392	0.641583	0.52536	0.999971	-0.288812	-0.877194	0.386414	0.558093	-0.530653	-1.50282	0.141933	0.324105
AC005307.3	-0.645434	-2.11983	0.0412476	0.346011	0.126011	0.404255	0.688506	0.958137	-0.350303	-1.05696	0.297832	0.465627	-0.078388	-0.241271	0.810765	0.999971	-0.647168	-2.10654	0.0424611	0.165208	-0.581184	-1.76392	0.0865479	0.24669
AC005336.5	-1.36643	-2.63689	0.0124311	0.308921	-1.58073	-2.97964	0.00524076	0.544733	-2.06429	-3.65968	0.00083189	0.0384154	-0.378912	-0.685253	0.497736	0.999971	-0.664765	-1.27138	0.212048	0.386566	-0.851191	-1.51792	0.138092	0.319033
AC005537.2	-0.666113	-2.65449	0.0119065	0.306004	-0.54272	-2.11255	0.0419084	0.735687	-0.843695	-3.08877	0.00394139	0.0603456	0.00816727	0.0305012	0.975842	0.999971	-0.342262	-1.35174	0.185203	0.356896	-0.215531	-0.793707	0.43276	0.617372
AC005578.3	-0.619091	-2.00894	0.0523731	0.359127	-1.1475	-3.63717	0.000886113	0.451754	-1.28891	-3.8424	0.000495977	0.0345117	-0.16739	-0.509038	0.613947	0.999971	-0.539933	-1.73642	0.0913604	0.240602	-0.633575	-1.89989	0.0657834	0.211464
AC005616.1	-0.600898	-1.7389	0.0909183	0.394104	-0.376475	-1.06416	0.294604	0.903468	-0.813407	-2.16246	0.0375606	0.149149	-0.53267	-1.44457	0.157549	0.999971	-0.649792	-1.86359	0.0708592	0.210821	-0.490199	-1.31088	0.198508	0.390731
AC006372.4	-0.47673	-1.48168	0.147448	0.440781	-0.358714	-1.08901	0.283657	0.897938	-0.659557	-1.88323	0.0680728	0.198445	-0.395343	-1.1515	0.257399	0.999971	-0.693311	-2.13558	0.0398502	0.16085	-0.769317	-2.20956	0.03383	0.146482
AC007193.6	-0.585905	-1.3416	0.18844	0.473303	-1.11151	-2.48604	0.0178839	0.654816	-0.672428	-1.41452	0.16612	0.326921	0.596875	1.28081	0.208754	0.999971	-0.139997	-0.317701	0.752616	0.847516	-1.04866	-2.21895	0.0331269	0.144744
AC007389.1	-1.04088	-2.84093	0.00747774	0.300887	-0.705871	-1.88184	0.0682669	0.785976	-0.966269	-2.42283	0.0207602	0.115137	0.18879	0.482885	0.63221	0.999971	-0.449178	-1.21501	0.232565	0.408454	-0.412043	-1.03925	0.305877	0.502969
AC007403.3	-1.07631	-2.38363	0.02275	0.321455	-0.964747	-2.08694	0.0443067	0.742995	-0.669331	-1.36178	0.182043	0.344588	-0.180546	-0.374708	0.710158	0.999971	-1.42419	-3.12586	0.00357408	0.0755901	-1.22303	-2.50296	0.0171781	0.10075
AC007563.1	-0.467814	-1.7442	0.0899782	0.39339	-0.111579	-0.406352	0.686979	0.957955	-0.526518	-1.80344	0.0800072	0.216476	0.508098	1.77532	0.0846175	0.999971	-0.430563	-1.59097	0.120687	0.280649	-0.0484995	-0.1671	0.868261	0.925298
AC007563.5	-0.982918	-2.38231	0.0228197	0.321455	-0.455561	-1.07851	0.288244	0.900577	-0.242122	-0.539117	0.593249	0.721996	0.163499	0.371366	0.712623	0.999971	-0.42796	-1.02798	0.311069	0.488415	-0.778555	-1.74376	0.0900547	0.252349
AC007795.1	-1.23135	-3.479	0.00137567	0.243126	-0.356727	-0.984483	0.331692	0.90971	-1.16436	-3.02223	0.00469175	0.0645417	-0.115587	-0.306048	0.761396	0.999971	-0.106317	-0.2977	0.767707	0.857484	-0.370297	-0.96681	0.340329	0.536189
AC007919.18	0.73392	2.08744	0.0442596	0.349596	1.09759	3.04933	0.00437118	0.534089	1.48516	3.88065	0.000444636	0.0339501	0.549618	1.46498	0.151928	0.999971	0.656076	1.84936	0.0729384	0.21401	0.720734	1.89433	0.0665392	0.213076
AC008069.1	-0.369452	-1.30569	0.200249	0.483981	-0.523028	-1.80553	0.0796739	0.797694	-0.435379	-1.41356	0.166398	0.327229	-0.586946	-1.94395	0.0600452	0.999971	-0.697266	-2.44221	0.0198367	0.120239	-1.03637	-3.38465	0.00178231	0.0289804
AC009950.2	0.441829	1.88665	0.0675974	0.372758	0.423041	1.76448	0.0864521	0.80729	0.58152	2.28123	0.0287864	0.132111	-0.181477	-0.726215	0.472577	0.999971	0.146067	0.618148	0.540514	0.688054	0.253724	1.00119	0.323667	0.520224
AC010733.5	0.198972	0.630077	0.532772	0.732129	0.480745	1.48701	0.146042	0.846682	0.783559	2.2795	0.0288993	0.1323	-0.0940029	-0.278965	0.781928	0.999971	0.329846	1.03518	0.307746	0.485145	0.333345	0.975468	0.336079	0.532281
AC010894.5	0.300817	1.32248	0.19466	0.478767	0.0326316	0.140127	0.88937	0.987732	-0.311078	-1.25638	0.21737	0.383378	0.138605	0.571047	0.571648	0.999971	0.128717	0.56082	0.578524	0.718383	0.397694	1.61567	0.115223	0.288362
AC011513.4	-0.797222	-2.01241	0.0519888	0.359042	-0.910093	-2.244	0.0313154	0.718536	-0.866143	-2.00861	0.0524106	0.17383	-0.0830572	-0.196482	0.845379	0.999971	0.0843452	0.211009	0.834114	0.901184	-0.136117	-0.317518	0.752753	0.852887
AC011648.1	-0.309881	-0.804755	0.42644	0.657954	-0.723474	-1.83523	0.0750544	0.790063	-0.784923	-1.87268	0.0695575	0.200835	-0.152152	-0.370299	0.71341	0.999971	-0.611425	-1.57368	0.124636	0.28511	-0.645806	-1.54985	0.130251	0.307998
AC012354.6	-0.565935	-1.97432	0.0563462	0.362207	-0.0556837	-0.189748	0.850612	0.982838	-0.707979	-2.26903	0.0295943	0.133791	0.0587896	0.192202	0.848704	0.999971	-0.33126	-1.14531	0.259918	0.436088	-0.357821	-1.15354	0.25657	0.454021
AC012499.1	-0.244375	-0.674082	0.504725	0.713436	-0.0550391	-0.148295	0.882968	0.987303	-0.0752093	-0.190588	0.849959	0.90797	-0.38007	-0.982487	0.332661	0.999971	-0.932514	-2.54926	0.0153754	0.109114	-0.597893	-1.52404	0.13656	0.317123
AC015922.6	-1.35188	-3.40031	0.00170765	0.249754	-1.01919	-2.504	0.0171356	0.651996	-1.11279	-2.57135	0.0145781	0.0985719	0.600699	1.41594	0.165708	0.999971	0.192594	0.480094	0.634173	0.76156	-0.0332861	-0.0773679	0.938775	0.967192
AC016908.1	-0.624478	-1.5062	0.141066	0.435818	-0.49238	-1.16002	0.253961	0.888798	-0.918003	-2.03412	0.0496395	0.168994	-0.115446	-0.260945	0.795677	0.999971	-0.82699	-1.97683	0.0560506	0.188179	-0.505575	-1.12685	0.267536	0.46524
AC017083.2	0.457055	1.00615	0.321308	0.580177	-0.0147654	-0.0317496	0.974854	0.997596	-0.183767	-0.371645	0.712417	0.812335	0.139012	0.286782	0.775985	0.999971	-0.415213	-0.905874	0.371249	0.544116	0.0985178	0.200413	0.842328	0.909344
AC018880.1	-0.68687	-1.30747	0.199648	0.483117	-0.613224	-1.14019	0.262017	0.888798	-0.623814	-1.09089	0.282838	0.450687	0.32045	0.571643	0.571248	0.999971	0.239998	0.452762	0.653538	0.776147	-0.211944	-0.372819	0.711551	0.825808
AC021876.4	-1.30403	-2.35611	0.0242481	0.323375	-0.682504	-1.20451	0.236544	0.883095	-0.849501	-1.41006	0.167422	0.32844	-0.572892	-0.970031	0.338744	0.999971	-0.698024	-1.24991	0.219695	0.394772	-1.00499	-1.67797	0.102339	0.270742
AC022201.4	-0.903926	-2.46503	0.0187967	0.316803	-0.610313	-1.6257	0.113062	0.825661	-1.2819	-3.21153	0.00284581	0.0543272	-0.462392	-1.1817	0.24536	0.999971	-1.09044	-2.9471	0.00570037	0.0835593	-1.02713	-2.58842	0.0139884	0.0899468
AC024060.1	0.095615	0.304541	0.762535	0.87626	-0.023046	-0.0716991	0.943253	0.993271	-0.594375	-1.73919	0.0908666	0.231986	-0.436022	-1.30147	0.201672	0.999971	0.116966	0.369218	0.714209	0.81996	-0.326166	-0.960008	0.343693	0.539338
AC027119.1	-0.124945	-0.305933	0.761484	0.875812	0.0959877	0.229573	0.819771	0.978709	0.570117	1.28244	0.208189	0.373316	0.645155	1.48039	0.147791	0.999971	0.169885	0.412253	0.68269	0.797492	0.778351	1.76116	0.0870212	0.247567
AC062031.1	-0.61002	-1.673	0.10332	0.403299	0.21044	0.563741	0.576556	0.941497	-0.295284	-0.743979	0.461897	0.614793	0.0511173	0.131379	0.896234	0.999971	-0.396232	-1.07698	0.288921	0.466173	-0.692571	-1.75523	0.088045	0.249193
AC067945.3	0.308394	0.724632	0.473535	0.691363	0.845253	1.93998	0.0605438	0.778214	1.86419	4.02411	0.00029434	0.0316065	0.860585	1.89501	0.0664465	0.999971	1.25395	2.92007	0.00611081	0.084986	1.7603	3.82223	0.000525317	0.0153231
AC068138.1	0.0830016	0.155658	0.877205	0.93945	-0.312759	-0.572918	0.570394	0.941051	-0.627687	-1.08142	0.286967	0.45484	0.149407	0.262581	0.794426	0.999971	0.00699028	0.0129922	0.989708	0.994279	0.489009	0.84746	0.402546	0.592636
AC074389.6	-0.98285	-2.59268	0.0138444	0.312416	-0.536638	-1.38275	0.175577	0.863307	-1.26476	-3.06506	0.00419466	0.0618271	-0.245512	-0.606935	0.547845	0.999971	-0.110618	-0.289194	0.774154	0.861661	-0.676505	-1.64911	0.108149	0.278962
AC079248.1	-0.370721	-0.992861	0.327651	0.584631	-0.00739782	-0.0193528	0.984671	0.998731	-0.835158	-2.05484	0.0474844	0.165179	-0.854761	-2.14532	0.0390061	0.999971	-0.87059	-2.31078	0.0269111	0.136017	-0.840517	-2.0802	0.0449581	0.171693
AC079305.11	-1.17921	-3.16817	0.00319471	0.273985	-0.895715	-2.35064	0.0245562	0.6978	-1.05667	-2.60809	0.0133359	0.0954647	0.916578	2.30777	0.0270967	0.999971	-0.345226	-0.919228	0.364322	0.537771	-0.22112	-0.548988	0.586529	0.738356
AC079779.7	-0.469431	-1.67978	0.101982	0.4028	-0.0465521	-0.162712	0.871689	0.986139	-0.601101	-1.97604	0.0561431	0.179583	-0.433653	-1.45422	0.154871	0.999971	-0.790518	-2.80347	0.00822012	0.0908898	-0.803808	-2.65797	0.0118051	0.0815997
AC090505.4	-0.212781	-0.59649	0.55472	0.747166	0.389773	1.06729	0.293211	0.903009	-0.520727	-1.34106	0.188613	0.352023	0.617779	1.62297	0.113647	0.999971	-0.376702	-1.04658	0.30253	0.479875	-0.0380534	-0.0985783	0.92204	0.958341
AC092669.6	-1.03977	-2.49325	0.0175797	0.31579	-1.02577	-2.40258	0.0217673	0.678604	-1.05125	-2.3158	0.0266035	0.127439	0.250091	0.561997	0.57773	0.999971	-0.388407	-0.923038	0.362361	0.535858	-0.328482	-0.727877	0.471572	0.649436
AC092675.3	-0.564798	-1.74028	0.0906721	0.394004	-0.445852	-1.34189	0.188348	0.866706	-0.618124	-1.74972	0.0890058	0.229652	-0.191726	-0.553623	0.583387	0.999971	-0.481139	-1.46926	0.15077	0.317748	-0.866543	-2.46737	0.0186932	0.104952
AC093732.1	0.849932	2.79157	0.00847004	0.300887	0.482462	1.54784	0.130733	0.837636	0.707711	2.13544	0.0398619	0.1527	-0.134987	-0.415491	0.68034	0.999971	0.206774	0.673074	0.505358	0.658742	0.119638	0.36312	0.718718	0.830562
AC093911.1	-1.84699	-4.27008	0.0001438	0.175498	-1.13286	-2.55827	0.0150455	0.638565	-1.66008	-3.52588	0.00120841	0.0414957	-0.522012	-1.13099	0.265817	0.999971	-0.676032	-1.54896	0.130464	0.292426	-0.619832	-1.32423	0.194084	0.385563
AC096558.1	1.01733	3.43101	0.00156989	0.249754	0.842733	2.77618	0.00880365	0.60194	0.495139	1.5341	0.134072	0.288101	-0.0365553	-0.115536	0.908686	0.999971	0.258783	0.864964	0.392999	0.563924	0.0749065	0.233451	0.816783	0.893738
AC097532.2	-1.29948	-2.59531	0.0137566	0.311772	-0.766209	-1.49474	0.144022	0.84526	-1.3483	-2.47385	0.0184084	0.109111	-0.452832	-0.847544	0.4025	0.999971	-0.180979	-0.358221	0.722348	0.825974	-0.464695	-0.857638	0.396977	0.58778
AC098823.3	-0.229474	-0.915234	0.366385	0.612772	0.0233783	0.0910773	0.927955	0.991708	-0.18358	-0.672651	0.505624	0.650593	-0.0468699	-0.175186	0.861952	0.999971	-0.662525	-2.6188	0.0129924	0.103193	-0.424879	-1.56596	0.126433	0.303131
AC112715.2	-0.781125	-1.53654	0.133474	0.4299	-0.886735	-1.7038	0.09736	0.811733	-0.779046	-1.40785	0.168072	0.329102	0.359921	0.663496	0.511397	0.999971	0.212412	0.414101	0.681348	0.796608	-0.319834	-0.581388	0.564737	0.722475
AC114755.5	-0.893169	-2.37353	0.0232898	0.321496	-0.938671	-2.43653	0.0201033	0.667685	-1.08457	-2.64779	0.0121036	0.0923147	0.496844	1.23733	0.224271	0.999971	-0.606635	-1.59768	0.119181	0.278551	-0.154317	-0.378957	0.707028	0.822684
AC114808.2	-0.854632	-1.47631	0.148878	0.441975	-1.02796	-1.7345	0.091705	0.811514	-1.61426	-2.56177	0.0149193	0.0995748	-0.18886	-0.305736	0.761633	0.999971	-0.481208	-0.823826	0.415665	0.583129	-0.753893	-1.20344	0.23695	0.434075
AC114813.1	-0.936832	-2.3674	0.0236231	0.322061	-0.845654	-2.08737	0.0442655	0.742995	-0.725998	-1.68543	0.100878	0.245234	-0.308654	-0.73095	0.469716	0.999971	-0.0560477	-0.140369	0.88918	0.935593	-0.561026	-1.31012	0.198763	0.391054
AC116366.6	0.385206	1.47902	0.148156	0.441531	0.479201	1.79721	0.0810104	0.799713	0.680168	2.39919	0.02194	0.117687	0.129821	0.467126	0.643329	0.999971	0.590237	2.24601	0.031174	0.144593	0.592005	2.10051	0.0430215	0.167258
AC124861.1	-0.35723	-0.809227	0.423898	0.656263	-0.441997	-0.978002	0.334842	0.91019	-0.901024	-1.87511	0.0692137	0.200384	0.745396	1.5824	0.122632	0.999971	-0.458713	-1.02983	0.310214	0.487591	0.0189121	0.0395894	0.968647	0.98406
AC124944.5	-0.536404	-1.818	0.0777054	0.382138	-0.462037	-1.5296	0.135182	0.840578	-0.57938	-1.80398	0.0799203	0.216323	0.308021	0.978336	0.33468	0.999971	-0.321544	-1.08006	0.287567	0.464882	-0.189411	-0.593231	0.556874	0.716493
AC124997.1	-0.691796	-2.50048	0.0172801	0.31562	-0.31812	-1.12314	0.269088	0.892291	-0.497391	-1.65162	0.107635	0.254461	0.12513	0.42385	0.674291	0.999971	-0.386596	-1.38486	0.174936	0.345735	-0.272303	-0.909526	0.369347	0.562588
AC126365.1	-1.09687	-4.31734	0.000125165	0.175498	-0.641152	-2.46503	0.0187968	0.657171	-1.06481	-3.85035	0.000484846	0.0345117	-0.0905612	-0.33405	0.740352	0.999971	-0.329907	-1.28693	0.206636	0.380926	-0.303367	-1.10344	0.277431	0.475035
AC133680.1	-0.869993	-2.41273	0.0212571	0.32041	-0.546653	-1.48083	0.147676	0.847847	-0.869699	-2.2158	0.0333618	0.140927	-0.0014157	-0.00367936	0.997085	0.999971	-1.10368	-3.03347	0.0045561	0.0791837	-0.252215	-0.64637	0.522292	0.689529
AC142293.3	-0.370508	-0.904529	0.371952	0.616819	-0.688832	-1.64262	0.109494	0.822654	-0.22658	-0.508177	0.614545	0.739215	-0.225903	-0.516837	0.608549	0.999971	-0.631087	-1.52692	0.135844	0.298902	-0.494289	-1.11513	0.27246	0.469847
AC145110.1	-0.15419	-0.571559	0.571305	0.75862	-0.236928	-0.857865	0.396854	0.918233	-0.677874	-2.30845	0.027055	0.128399	-0.240022	-0.833799	0.410097	0.999971	-0.514501	-1.89014	0.067115	0.205666	-0.804858	-2.75702	0.00923622	0.0705391
ACADL	-0.502494	-1.87548	0.0691612	0.373873	-0.531703	-1.93842	0.0607406	0.778214	-0.361045	-1.23797	0.224039	0.390227	-0.172955	-0.604952	0.549147	0.999971	-0.432386	-1.59939	0.1188	0.278103	-0.434781	-1.49958	0.142768	0.325001
ACAT2	0.295565	1.12867	0.266778	0.537592	0.407983	1.52179	0.137122	0.842061	0.832232	2.91962	0.0061179	0.0709354	0.317137	1.13493	0.264184	0.999971	0.824845	3.1217	0.00361362	0.0755901	1.10551	3.90117	0.000419273	0.0137851
ACO1	0.539052	2.11979	0.041251	0.346011	0.673565	2.58727	0.0140275	0.635404	1.01589	3.67008	0.000807936	0.0380077	0.332914	1.22688	0.228127	0.999971	0.823213	3.20832	0.00287035	0.0724145	0.918341	3.33721	0.00202808	0.0310933
ACOT12	-0.670382	-2.68597	0.011019	0.303857	-0.369677	-1.44677	0.156935	0.855362	-0.698084	-2.56953	0.0146426	0.0987989	0.152696	0.573341	0.570111	0.999971	-0.263448	-1.04611	0.302745	0.480033	-0.138563	-0.51303	0.611181	0.756467
ACOX1	0.258223	1.05007	0.300944	0.565519	0.339066	1.34681	0.186772	0.866706	0.873715	3.26408	0.00247156	0.0523342	0.372927	1.4212	0.164185	0.999971	0.898272	3.62022	0.000929202	0.062681	1.19097	4.4755	7.84822e-05	0.00655803
ACP2	0.11126	0.365126	0.717234	0.849413	0.412938	1.32369	0.194259	0.869623	1.30927	3.94731	0.000367275	0.0326157	0.49937	1.53579	0.133658	0.999971	1.02352	3.32891	0.00207434	0.0688096	1.63919	4.97108	1.78561e-05	0.00428135
ACSL1	0.761365	2.4534	0.0193205	0.318715	0.84337	2.65455	0.0119047	0.616105	0.932899	2.7617	0.00912888	0.0823006	0.628517	1.89801	0.0660384	0.999971	1.13478	3.624	0.000919423	0.062681	1.01588	3.02506	0.00465725	0.0486387
ACSL4	0.535536	1.6392	0.110207	0.409133	0.587964	1.7579	0.0875839	0.80729	1.31814	3.70656	0.000729086	0.03655	0.466052	1.33686	0.189968	0.999971	1.09045	3.3079	0.00219584	0.0694064	1.47507	4.17229	0.000191421	0.00941273
ACSL5	0.159304	0.59798	0.553736	0.7465	0.301855	1.10676	0.27601	0.894863	1.10897	3.82425	0.0005223	0.0345569	0.292709	1.02968	0.310285	0.999971	0.906201	3.37121	0.00184888	0.0669683	1.26258	4.3796	0.000104197	0.00732027
ACTL7B	-0.69888	-2.15793	0.0379385	0.342769	-0.329265	-0.993064	0.327553	0.908261	-0.566661	-1.6074	0.117029	0.266806	0.0466315	0.134933	0.893444	0.999971	-0.327341	-1.0017	0.323423	0.499892	-0.682338	-1.94693	0.0596731	0.199991
ADAM19	0.215931	0.846085	0.403302	0.641148	0.359177	1.37469	0.178039	0.864313	0.827592	2.97908	0.00524837	0.0670207	0.110666	0.406367	0.686968	0.999971	0.682673	2.65103	0.0120081	0.100436	0.776508	2.81165	0.00805237	0.0655905
ADAM2	-1.35131	-4.33076	0.000120321	0.175498	-1.04894	-3.28366	0.00234448	0.494801	-1.53301	-4.51356	7.01086e-05	0.0312363	0.186655	0.560603	0.57867	0.999971	-0.484175	-1.53785	0.133155	0.295768	-0.166506	-0.493122	0.625033	0.766157
ADAM28	0.153866	0.551171	0.585048	0.768413	0.511948	1.7913	0.0819703	0.799758	0.83244	2.73945	0.00965015	0.0842268	0.657109	2.20591	0.034107	0.999971	1.05855	3.75802	0.000630392	0.060598	1.39988	4.63397	4.90097e-05	0.00569374
ADAM30	-0.683016	-2.21741	0.0332418	0.33708	-0.190469	-0.604002	0.549771	0.93952	-0.375526	-1.12001	0.270402	0.438189	0.0498642	0.151708	0.880296	0.999971	-0.847692	-2.72744	0.00994302	0.0952919	-0.584583	-1.75379	0.0882956	0.249581
ADAM8	0.284703	1.10248	0.277841	0.546183	0.509813	1.92836	0.0620238	0.778214	1.09339	3.88975	0.000433211	0.0337851	0.311519	1.1305	0.26602	0.999971	0.948745	3.64109	0.000876446	0.0618203	1.24042	4.43878	8.74914e-05	0.00685296
ADAMTS1	-0.66969	-2.63065	0.0126221	0.308921	-0.54388	-2.08685	0.0443156	0.742995	-0.832472	-3.00418	0.00491737	0.0655982	-0.320103	-1.17838	0.246662	0.999971	-0.729326	-2.83932	0.00750838	0.0891881	-0.504369	-1.83086	0.0757198	0.229372
ADAMTS18	-0.428539	-1.5942	0.119959	0.418085	-0.265499	-0.964754	0.341344	0.911019	-0.514282	-1.75761	0.0876333	0.227498	-0.235512	-0.821057	0.417219	0.999971	-0.535912	-1.97584	0.0561673	0.188423	-0.492834	-1.69423	0.0991799	0.265619
ADAMTS20	-0.703034	-2.47716	0.0182647	0.31663	-0.129514	-0.445751	0.658546	0.954056	-0.596242	-1.93004	0.0618076	0.189527	0.102262	0.337676	0.737642	0.999971	-0.40243	-1.40531	0.16882	0.338901	-0.3618	-1.17805	0.246792	0.443931
ADAMTS5	-0.529669	-1.94196	0.0602941	0.365936	-0.271921	-0.973821	0.336885	0.91019	-0.701648	-2.36332	0.0238468	0.121588	-0.166743	-0.572916	0.570396	0.999971	-0.534658	-1.94275	0.0601957	0.194462	-0.659721	-2.23519	0.0319421	0.141771
ADAMTSL4	0.0585364	0.276864	0.783527	0.889076	0.369662	1.70783	0.0966016	0.811733	0.366398	1.59207	0.120439	0.270738	0.184403	0.817361	0.419299	0.999971	0.497654	2.33276	0.0255883	0.133212	0.68712	3.00324	0.00492943	0.0500501
ADAMTSL4-AS1	0.368812	1.68779	0.100421	0.401222	0.378586	1.69229	0.0995518	0.814315	0.808249	3.39801	0.0017184	0.0464566	0.391537	1.67916	0.102105	0.999971	0.831909	3.77304	0.000604127	0.060598	0.660472	2.79308	0.00843787	0.067118
ADAR	0.507612	2.01771	0.0514062	0.358853	0.459812	1.78528	0.0829589	0.800242	1.11091	4.05669	0.000267865	0.0316065	0.142152	0.529527	0.599812	0.999971	0.783265	3.0856	0.00397443	0.0773781	1.04304	3.83128	0.000511942	0.0150757
ADCY10	-0.676653	-2.68696	0.0109921	0.303857	-0.293702	-1.1392	0.262423	0.888798	-0.724731	-2.64386	0.0122209	0.092392	-0.0859334	-0.319789	0.751046	0.999971	-0.487262	-1.91761	0.0634214	0.199576	-0.463522	-1.70091	0.0979055	0.263993
ADD3-AS1	-0.295059	-1.22306	0.22955	0.507663	-0.293363	-1.1878	0.242981	0.88601	-0.362461	-1.38028	0.176328	0.3384	-0.283221	-1.1002	0.27882	0.999971	-0.670934	-2.75627	0.00925374	0.0930088	-0.429105	-1.64369	0.109272	0.280469
ADGRE1	0.180422	0.685143	0.497805	0.708438	0.535396	1.98593	0.0549857	0.769126	1.15881	4.0427	0.000278936	0.0316065	0.618202	2.20003	0.0345575	0.999971	0.886508	3.33639	0.00203261	0.0686027	1.44985	5.08783	1.25637e-05	0.00412098
ADGRE2	0.589227	2.2402	0.0315841	0.335249	0.933243	3.46576	0.00142683	0.456659	0.947657	3.30996	0.00218361	0.0497706	0.628924	2.24083	0.0315394	0.999971	1.01874	3.83857	0.000501418	0.060598	1.26891	4.45811	8.2627e-05	0.00669718
ADGRL4	-0.678181	-2.17362	0.036645	0.342292	-0.764477	-2.39332	0.0222423	0.680085	-1.1647	-3.42942	0.00157674	0.0450719	-0.0878292	-0.263805	0.79349	0.999971	-0.598604	-1.90143	0.0655746	0.203326	-0.0616425	-0.182573	0.856196	0.918239
ADH7	-0.669018	-2.03485	0.0495621	0.35688	-0.409269	-1.21591	0.232225	0.881469	-0.495133	-1.38351	0.175343	0.337167	0.197897	0.56408	0.576327	0.999971	-0.392033	-1.18174	0.245346	0.421873	0.17422	0.489678	0.627443	0.767635
ADIPOR2	0.3662	1.88057	0.0684446	0.373408	0.26928	1.35075	0.185518	0.866341	0.649818	3.06571	0.0041876	0.061787	0.189279	0.910918	0.368623	0.999971	0.569759	2.89979	0.00643691	0.0863845	0.699018	3.31724	0.00214098	0.0319542
ADO	0.415854	1.3786	0.176841	0.463934	0.52739	1.70776	0.0966134	0.811733	0.965889	2.94165	0.00578097	0.0694639	0.49505	1.53798	0.133122	0.999971	1.12951	3.71098	0.000720061	0.0608829	1.22714	3.7593	0.000628116	0.0166749
ADORA3	-1.19368	-1.93488	0.0611899	0.366891	-2.88523	-4.56818	5.96107e-05	0.268843	-2.73112	-4.06699	0.000259992	0.0316065	-2.43949	-3.7057	0.000730851	0.721855	-2.85632	-4.58854	5.61093e-05	0.0533688	-2.76169	-4.13673	0.000212319	0.00994431
ADPGK	0.4009	1.7273	0.0930056	0.395328	0.417663	1.75775	0.0876096	0.80729	0.895893	3.54614	0.00114235	0.0405909	0.322121	1.30064	0.201953	0.999971	0.803288	3.4301	0.00157382	0.0669683	1.0241	4.07749	0.000252195	0.0106976
ADPRH	0.113157	0.480939	0.633579	0.799035	0.373161	1.54919	0.13041	0.837538	0.90242	3.52358	0.00121613	0.0415769	0.0479382	0.19094	0.849685	0.999971	0.557165	2.3469	0.0247687	0.131412	0.916538	3.59978	0.000983817	0.0210751
ADRA2C	-0.411663	-1.08284	0.286345	0.553475	-0.807533	-2.07483	0.0454832	0.746376	-0.939281	-2.26979	0.0295429	0.133679	-0.543632	-1.34009	0.188924	0.999971	-0.482754	-1.2585	0.216613	0.391712	-1.02385	-2.48872	0.0177703	0.102207
AE000661.37	-0.103747	-0.512493	0.611553	0.785001	0.0980421	0.47307	0.639126	0.950488	0.222989	1.01196	0.31856	0.485741	0.237781	1.10077	0.278574	0.999971	0.404005	1.9779	0.0559243	0.188008	0.648942	2.96236	0.00548037	0.0531364
AE000662.93	0.201105	0.506274	0.615866	0.787579	0.113112	0.278144	0.782552	0.972966	-0.643143	-1.48743	0.145932	0.302371	-0.155992	-0.36802	0.715093	0.999971	-0.59064	-1.47363	0.149596	0.316224	-0.111917	-0.260362	0.796124	0.87997
AF001548.6	-1.65949	-3.35707	0.00192151	0.254109	-1.0413	-2.0576	0.0472038	0.756923	-1.57556	-2.9281	0.00598607	0.0703038	-0.118672	-0.224978	0.823316	0.999971	0.259353	0.51997	0.606386	0.739755	-0.265182	-0.49573	0.62321	0.764866
AF064858.7	-0.471013	-1.45594	0.154398	0.446391	-0.61072	-1.84395	0.073742	0.789875	-0.645948	-1.83432	0.0751933	0.20968	0.257938	0.747191	0.459982	0.999971	-0.138452	-0.424141	0.674081	0.791157	-0.226326	-0.646488	0.522216	0.689529
AF127577.12	-0.21074	-0.388922	0.69971	0.839103	0.553799	0.998314	0.325038	0.907981	-1.04792	-1.77669	0.0843865	0.222871	-0.215917	-0.37343	0.7111	0.999971	-0.437157	-0.79957	0.429399	0.594451	-0.167808	-0.286185	0.776438	0.868351
AF127577.13	0.478397	2.63018	0.0126367	0.308921	0.4268	2.29203	0.0280879	0.706108	0.230482	1.16413	0.252312	0.41944	0.378784	1.95162	0.0590923	0.999971	0.0995363	0.542352	0.591042	0.728149	-0.00427001	-0.0216942	0.982816	0.991156
AF241725.6	-0.713578	-1.7102	0.0961567	0.397794	-0.529956	-1.24063	0.223063	0.879618	-0.500002	-1.10089	0.278522	0.446186	-0.473564	-1.06363	0.294842	0.999971	-1.80728	-4.29273	0.000134553	0.0556884	-0.501563	-1.11083	0.274278	0.471833
AFAP1L2	-0.249563	-1.34644	0.18689	0.471743	-0.306303	-1.6142	0.115542	0.826609	-0.393593	-1.95084	0.0591881	0.184919	-0.020153	-0.101895	0.919426	0.999971	-0.193766	-1.03607	0.307337	0.484774	-0.443867	-2.21298	0.0335726	0.145899
AFDN	0.0557516	0.244741	0.808098	0.902314	0.253192	1.08567	0.285109	0.89876	0.240343	0.96928	0.339113	0.504543	0.198476	0.816515	0.419776	0.999971	0.359425	1.56373	0.126956	0.288239	0.429845	1.74373	0.0900605	0.252349
AGAP1	-0.545895	-2.7236	0.0100386	0.300887	-0.336742	-1.64108	0.109815	0.822654	-0.667186	-3.05807	0.00427224	0.0622345	-0.149923	-0.700986	0.487986	0.999971	-0.349609	-1.7287	0.0927525	0.242573	-0.334043	-1.54012	0.132602	0.311317
AGAP6	0.3564	1.78341	0.0832679	0.387321	0.143655	0.702154	0.487266	0.930107	0.480153	2.2073	0.0340017	0.142181	-0.0486901	-0.228329	0.820731	0.999971	0.277102	1.37422	0.178184	0.349346	0.234156	1.08277	0.286377	0.48354
AGK	0.318592	1.86456	0.0707195	0.374805	0.242901	1.38857	0.173811	0.863307	0.518619	2.78841	0.00853758	0.0804151	0.00632122	0.0346696	0.972542	0.999971	0.439184	2.54736	0.0154459	0.109306	0.466949	2.52539	0.016282	0.0976395
AHCYL1	0.589545	2.58401	0.0141386	0.313877	0.536725	2.29788	0.0277157	0.706108	1.00689	4.0544	0.000269647	0.0316065	0.360464	1.48063	0.147729	0.999971	0.997358	4.33243	0.000119733	0.0552022	1.0714	4.33956	0.000117246	0.00765774
AHCYP5	-0.473689	-1.54253	0.132015	0.428108	-0.284403	-0.904637	0.371896	0.916323	-0.427148	-1.27787	0.209777	0.374953	-0.271489	-0.828515	0.413041	0.999971	-0.517669	-1.67069	0.103779	0.258254	-0.255747	-0.769606	0.446741	0.628895
AIFM2	0.241808	1.26277	0.21509	0.496551	0.418304	2.13376	0.0400093	0.735106	0.562583	2.69903	0.0106689	0.0878581	0.292919	1.43354	0.160654	0.999971	0.506555	2.62171	0.0129008	0.102886	0.583004	2.81347	0.00801545	0.0653998
AKAP5	0.499795	2.14672	0.0388867	0.343367	0.609679	2.55789	0.0150593	0.638565	0.949956	3.74847	0.000647682	0.0355888	0.565782	2.27739	0.029038	0.999971	0.960816	4.09003	0.000243187	0.0593092	1.08187	4.29414	0.000133997	0.00809443
AKAP6	-0.256911	-1.63423	0.111251	0.410403	-0.124047	-0.770754	0.446069	0.923058	-0.234278	-1.36908	0.179771	0.34207	-0.00573922	-0.0342129	0.972903	0.999971	-0.141549	-0.892361	0.378346	0.550707	0.0332525	0.195467	0.846168	0.911683
ALAS1	0.450344	0.960015	0.34369	0.596787	1.02337	2.1309	0.0402607	0.735106	2.11766	4.14721	0.000205936	0.0316065	0.909645	1.81724	0.0778248	0.999971	1.70927	3.61117	0.000953002	0.0628112	2.43163	4.79013	3.07375e-05	0.00484484
ALDH1A2	0.665193	1.28013	0.208989	0.491238	1.73273	3.25715	0.00251808	0.494801	1.43885	2.54383	0.0155774	0.101283	1.27647	2.3021	0.0274498	0.999971	1.48436	2.83106	0.00766699	0.0896962	1.75572	3.12235	0.00360741	0.0422513
ALDH7A1	-0.288462	-1.5566	0.128639	0.425835	-0.396137	-2.08802	0.0442041	0.742995	-0.600395	-2.97642	0.00528465	0.0671427	-0.148443	-0.750681	0.457905	0.999971	-0.422344	-2.2587	0.0302937	0.142822	-0.298667	-1.48934	0.145431	0.328073
ALDOC	0.198635	1.07436	0.290074	0.556301	0.225659	1.19219	0.241276	0.884568	0.573691	2.85063	0.0072961	0.0753998	0.244388	1.23874	0.223756	0.999971	0.428043	2.29448	0.0279312	0.138232	0.708204	3.53973	0.00116286	0.0230745
ALG1L2	-0.559835	-2.12312	0.0409525	0.345983	-0.288502	-1.06871	0.292578	0.902627	-0.627885	-2.18756	0.0355293	0.145173	-0.364683	-1.29609	0.203499	0.999971	-0.655615	-2.46414	0.0188365	0.117763	-0.833197	-2.91997	0.00611239	0.0564765
ALK	-0.119071	-0.583688	0.563205	0.753146	-0.250976	-1.20173	0.237607	0.883969	-0.520803	-2.34539	0.0248554	0.124013	-0.295617	-1.35803	0.183219	0.999971	-0.677232	-3.29014	0.00230381	0.0703391	-0.564847	-2.55872	0.0150294	0.0934641
ALKBH3-AS1	-0.198145	-1.03201	0.309205	0.571152	-0.0874898	-0.445101	0.659011	0.954168	-0.145097	-0.69427	0.492135	0.63975	0.0505972	0.246965	0.806391	0.999971	-0.0286092	-0.147677	0.883453	0.932138	0.149421	0.719171	0.476851	0.653486
ALOX5AP	0.262116	1.11987	0.27046	0.540225	0.460894	1.92342	0.0626626	0.780587	1.08195	4.24665	0.00015402	0.0316065	0.106189	0.425169	0.673338	0.999971	0.512915	2.17182	0.0367918	0.155523	0.723876	2.85796	0.00716147	0.0616489
ALPK1	0.364248	1.46646	0.151528	0.444006	0.553178	2.17539	0.0365022	0.731729	1.10405	4.08345	0.000247873	0.0316065	0.376835	1.42177	0.164018	0.999971	0.845785	3.3747	0.00183135	0.0669683	1.1317	4.21038	0.000171268	0.00886754
AMBRA1	0.378116	2.5205	0.0164737	0.31562	0.290283	1.89008	0.067123	0.78595	0.523803	3.20772	0.00287499	0.0544056	0.133702	0.83523	0.409302	0.999971	0.461535	3.04908	0.00437401	0.0790003	0.514792	3.1711	0.00316989	0.039247
AMER2	-0.591501	-2.19294	0.0351074	0.339968	-0.436718	-1.5815	0.122836	0.830397	-0.813088	-2.76933	0.00895614	0.0816393	0.0274186	0.0952624	0.924654	0.999971	-0.480708	-1.76626	0.0861489	0.233242	-0.546629	-1.87275	0.0695473	0.218226
AMIGO2	0.381582	1.94998	0.0592943	0.365421	0.109034	0.544258	0.589744	0.944589	0.191031	0.896838	0.375985	0.539078	0.146477	0.701487	0.487677	0.999971	0.368018	1.86387	0.0708191	0.210802	0.231748	1.0944	0.281319	0.478716
ANAPC2	0.423228	2.65047	0.0120246	0.306074	0.369581	2.26077	0.0301525	0.715094	0.448039	2.57769	0.0143564	0.0979606	-0.0734626	-0.431142	0.669031	0.999971	0.24297	1.50801	0.140603	0.304928	0.367225	2.12519	0.0407674	0.162295
ANKRD13A	0.261946	1.19004	0.242109	0.517706	0.13087	0.580746	0.565165	0.940913	0.565384	2.35972	0.0240467	0.122033	0.14538	0.618955	0.539989	0.999971	0.614923	2.76868	0.00897086	0.0927721	0.758252	3.18331	0.00306846	0.0386165
ANKRD18B	-0.147757	-0.487845	0.628728	0.796138	-0.113149	-0.364907	0.717395	0.963181	-0.335158	-1.0166	0.31638	0.483945	0.276745	0.856288	0.397713	0.999971	-0.614371	-2.01033	0.0522194	0.181568	-0.31608	-0.964377	0.34153	0.537288
ANKRD26P4	-0.0325717	-0.0875207	0.930761	0.966333	-0.313097	-0.821764	0.416822	0.921976	-0.0987805	-0.243842	0.808789	0.880279	-0.130952	-0.329752	0.74357	0.999971	-0.032373	-0.0862096	0.931795	0.96181	0.17994	0.446801	0.657795	0.788796
ANKRD28	0.556892	2.58835	0.0139907	0.313296	0.444698	2.0189	0.0512764	0.762113	0.631303	2.69561	0.0107596	0.088155	0.249454	1.08655	0.284726	0.999971	0.666235	3.06889	0.00415272	0.0779114	0.633353	2.72029	0.0101214	0.0746435
ANKRD30A	-0.530508	-1.8327	0.0754387	0.379679	-0.457736	-1.54459	0.131517	0.838365	-0.637383	-2.02287	0.0508454	0.171309	0.286253	0.926736	0.360464	0.999971	-0.0117476	-0.040221	0.968147	0.982459	0.0410534	0.131059	0.896486	0.942855
ANKRD33B	0.217215	1.01726	0.316071	0.576423	0.532361	2.43526	0.0201635	0.667685	0.385582	1.65892	0.106145	0.25238	0.112506	0.493766	0.624582	0.999971	0.57929	2.68869	0.0109452	0.0978325	0.654563	2.83276	0.00763418	0.0637276
ANKRD35	-0.906186	-3.44925	0.00149314	0.248433	-0.407021	-1.51329	0.13926	0.842565	-0.848142	-2.96581	0.00543164	0.0678995	-0.432554	-1.54296	0.131912	0.999971	-0.558871	-2.10825	0.0423029	0.165026	-0.658002	-2.31447	0.0266847	0.12818
ANKRD55	0.120627	0.388473	0.700039	0.839226	-0.414159	-1.30281	0.201217	0.870884	-0.914279	-2.70498	0.0105131	0.087328	-0.269611	-0.813696	0.421367	0.999971	-0.663829	-2.11873	0.0413465	0.163503	-1.18557	-3.52827	0.00120042	0.0235211
ANKRD62	-0.255689	-0.996568	0.325873	0.583499	-0.154604	-0.588593	0.559946	0.940516	-0.457459	-1.63801	0.110458	0.258221	-0.025887	-0.094555	0.925212	0.999971	-0.324411	-1.25312	0.218539	0.393667	-0.391383	-1.40966	0.16754	0.355159
ANKS1B	-0.548818	-2.28973	0.0282353	0.331015	-0.333591	-1.35947	0.182768	0.865474	-0.631754	-2.42142	0.020829	0.115292	0.0197565	0.0772452	0.938872	0.999971	-0.472674	-1.95443	0.058746	0.192569	-0.439022	-1.69262	0.0994898	0.266149
ANKS4B	-0.680186	-2.31532	0.026633	0.328416	-0.438117	-1.45671	0.154187	0.85402	-0.83412	-2.60843	0.0133249	0.0954647	-0.0227682	-0.0726305	0.942517	0.999971	-0.464312	-1.56638	0.126335	0.287303	-0.663793	-2.08801	0.0442042	0.170164
ANO4	-0.345996	-1.35582	0.183915	0.468936	-0.21032	-0.805025	0.426287	0.922417	-0.403458	-1.45243	0.155364	0.314038	-0.0816466	-0.29983	0.766096	0.999971	-0.593576	-2.3052	0.0272562	0.136914	-0.696295	-2.5214	0.0164384	0.0981039
ANOS2P	-0.0730425	-0.264828	0.792709	0.893914	-0.151403	-0.536195	0.595245	0.945321	-0.169083	-0.563191	0.576926	0.709148	0.110584	0.37574	0.709398	0.999971	0.245498	0.882144	0.383769	0.555778	-0.202806	-0.679494	0.501333	0.672362
ANXA1	0.647015	2.07666	0.0453041	0.350881	0.733797	2.30051	0.0275497	0.706108	1.32739	3.91397	0.000404171	0.0330768	0.529392	1.59233	0.120379	0.999971	0.993232	3.1594	0.00327008	0.0744173	1.35237	4.0111	0.000305618	0.0116467
AP000437.3	0.390457	1.87201	0.0696533	0.37423	0.657028	3.07693	0.00406604	0.52243	0.145075	0.638993	0.527023	0.668244	0.583469	2.62155	0.0129056	0.999971	0.22669	1.07714	0.28885	0.466132	0.4104	1.81827	0.0776631	0.231738
AP000770.1	-0.132108	-0.338545	0.736993	0.860879	-0.1588	-0.3975	0.693434	0.958452	-0.840932	-1.97977	0.0557044	0.178836	-0.0468308	-0.112467	0.911101	0.999971	-0.597152	-1.51661	0.138422	0.302208	-0.788998	-1.86844	0.0701619	0.219323
AP001610.5	0.686051	1.59804	0.119101	0.417369	1.13635	2.58549	0.0140881	0.635845	1.56072	3.33982	0.00201378	0.0483716	0.502101	1.09605	0.280606	0.999971	0.821506	1.89647	0.0662481	0.204243	0.979079	2.1075	0.0423725	0.165879
AP002962.1	-0.56898	-1.71827	0.0946587	0.396679	-0.23171	-0.6835	0.49883	0.932231	-0.608324	-1.68771	0.100437	0.244558	-0.10597	-0.299906	0.766038	0.999971	-0.320559	-0.959414	0.343987	0.519019	-0.757441	-2.11379	0.0417955	0.164577
AP3B2	-0.488046	-2.18606	0.0356485	0.340767	-0.37906	-1.65847	0.106237	0.818168	-0.765231	-3.14891	0.00336241	0.0573653	-0.0461927	-0.193901	0.847384	0.999971	-0.441691	-1.96075	0.0579744	0.191389	-0.472472	-1.95566	0.058595	0.197975
AP4E1	0.601605	2.56975	0.0146348	0.314443	0.465908	1.94392	0.0600493	0.77751	0.711923	2.7937	0.00842485	0.0799319	0.162833	0.651819	0.518812	0.999971	0.503218	2.13029	0.0403149	0.16171	0.489034	1.93035	0.0617688	0.204057
AP5B1	0.620458	2.72912	0.00990155	0.300887	0.558713	2.40048	0.0218744	0.678604	0.942203	3.80735	0.000548035	0.0347885	0.344321	1.41932	0.164726	0.999971	0.794419	3.46309	0.00143734	0.0666694	0.790907	3.2148	0.00282105	0.0368844
APBA1	-0.344124	-1.8627	0.070988	0.375139	-0.570032	-3.01388	0.00479489	0.537266	-0.480651	-2.39015	0.0224074	0.118632	-0.505336	-2.56339	0.0148611	0.999971	-0.397195	-2.13076	0.0402728	0.161609	-0.44128	-2.20729	0.0340023	0.14702
APBA3	0.22126	1.13089	0.265858	0.537217	0.294692	1.47124	0.150238	0.850325	0.678112	3.18409	0.00306212	0.0553791	0.200558	0.960644	0.343377	0.999971	0.541604	2.74348	0.00955391	0.0937996	0.555727	2.62479	0.012804	0.0855639
APOBEC3A	0.975448	1.31122	0.198393	0.481881	1.77008	2.32415	0.0260997	0.706108	2.70386	3.33905	0.00201798	0.0483716	0.986746	1.24304	0.222188	0.999971	1.24464	1.65813	0.106306	0.26142	1.61121	2.00144	0.0532128	0.187664
APOBEC3F	0.335414	1.81742	0.0777969	0.382151	0.29368	1.55434	0.129178	0.835864	0.681283	3.39131	0.0017502	0.0465647	0.224037	1.13762	0.263072	0.999971	0.285764	1.53456	0.133961	0.296576	0.5589	2.79849	0.00832386	0.066594
APOBEC3G	0.181923	0.697388	0.490206	0.702778	0.293557	1.0992	0.279249	0.896587	1.04521	3.68091	0.000783715	0.0373871	0.334318	1.20103	0.237875	0.999971	0.876461	3.32983	0.00206917	0.0688096	1.20085	4.25393	0.000150771	0.00839657
APOL1	0.0603133	0.188809	0.851343	0.925132	0.155908	0.476735	0.63654	0.949878	1.38568	3.98509	0.000329429	0.0319398	0.340669	0.999419	0.32451	0.999971	1.05804	3.28257	0.0023514	0.0710007	1.6415	4.7486	3.48051e-05	0.004975
APOL2	0.356388	1.15894	0.254395	0.527907	0.438102	1.39159	0.172904	0.86295	1.30954	3.9122	0.000406224	0.0330768	0.414193	1.26225	0.215276	0.999971	1.03706	3.34229	0.00200028	0.0681898	1.41317	4.24668	0.000154008	0.00846545
APOL3	0.0462508	0.122772	0.902996	0.953404	0.555382	1.44003	0.158821	0.855535	1.66432	4.05867	0.000266334	0.0316065	0.631707	1.57146	0.125151	0.999971	1.40168	3.6875	0.000769309	0.0613331	1.94853	4.77975	3.1708e-05	0.00490728
APOL6	0.313249	0.903671	0.372401	0.616985	0.329304	0.927932	0.359852	0.914408	1.36692	3.62269	0.000922782	0.03885	0.273224	0.738663	0.465078	0.999971	0.896058	2.56189	0.014915	0.107799	1.4911	3.97508	0.000339069	0.0122948
AQP9	0.923652	1.48432	0.14675	0.440508	2.01984	3.17056	0.00317444	0.508184	2.72645	4.02518	0.000293432	0.0316065	1.31705	1.98348	0.0552705	0.999971	2.26273	3.60376	0.000972941	0.0631599	2.75647	4.09346	0.000240777	0.0104627
ARAP2	0.463784	1.86595	0.0705192	0.374805	0.315974	1.24175	0.222656	0.879462	0.650074	2.40278	0.0217571	0.117205	0.188388	0.710302	0.482263	0.999971	0.667218	2.66045	0.0117335	0.0998667	0.694106	2.58064	0.0142544	0.0908773
ARFGAP3	0.35514	1.24195	0.222585	0.502655	0.399222	1.36369	0.181446	0.864712	1.08233	3.47722	0.00138246	0.0435485	0.442319	1.44959	0.15615	0.999971	0.986472	3.41894	0.00162273	0.0669683	1.37476	4.44272	8.64778e-05	0.00680276
ARFIP2	0.306475	1.89609	0.0662998	0.372443	0.2536	1.53254	0.134456	0.840578	0.507049	2.88191	0.00673766	0.0733947	0.161542	0.936602	0.355436	0.999971	0.446888	2.74009	0.00963479	0.0941899	0.471395	2.69504	0.0107746	0.0775073
ARFRP1	0.299851	1.58476	0.122092	0.420126	0.176356	0.910434	0.368875	0.916323	0.442826	2.1501	0.0385983	0.150527	0.0950618	0.470837	0.640703	0.999971	0.441212	2.31105	0.0268947	0.136017	0.441058	2.15413	0.0382574	0.156735
ARHGAP10	0.336623	1.22132	0.230199	0.508399	0.700886	2.48388	0.0179759	0.654816	1.11877	3.729	0.000684329	0.0364024	0.604362	2.05489	0.0474795	0.999971	1.04665	3.76346	0.000620758	0.060598	1.3666	4.58186	5.72352e-05	0.00582096
ARHGAP31	0.279133	0.838987	0.407219	0.64445	0.563762	1.65516	0.10691	0.81971	1.42136	3.92478	0.000391826	0.0329885	0.567089	1.59736	0.119253	0.999971	1.33305	3.97095	0.000343131	0.0593092	1.80219	5.00569	1.60906e-05	0.00415932
ARHGAP42P2	-1.49688	-3.51583	0.00124252	0.243126	-1.25768	-2.88542	0.00667765	0.571615	-1.69084	-3.64847	0.000858481	0.0386	-0.249452	-0.549077	0.586469	0.999971	-0.418085	-0.973212	0.337183	0.512664	-0.792697	-1.72054	0.0942414	0.258577
ARHGEF3	0.595109	3.19091	0.00300695	0.269255	0.392481	2.05558	0.0474086	0.756923	0.761625	3.75168	0.000641815	0.0355888	0.147676	0.742054	0.463048	0.999971	0.519831	2.76238	0.00911336	0.092916	0.58123	2.87994	0.00677166	0.0598781
ARHGEF7-AS2	-0.663481	-1.51554	0.138692	0.434031	-0.791791	-1.76664	0.0860834	0.806978	-0.384065	-0.805957	0.425756	0.584096	-0.59049	-1.26403	0.214643	0.999971	-0.678936	-1.53699	0.133364	0.295995	-0.110362	-0.232958	0.817162	0.893948
ARIH2	0.246103	1.31267	0.19791	0.481416	0.121491	0.632967	0.530905	0.937211	0.451605	2.21292	0.0335775	0.141288	0.088802	0.443883	0.659883	0.999971	0.476894	2.52095	0.0164559	0.111822	0.525174	2.58857	0.0139834	0.0899411
ARL4A	0.625591	2.53861	0.0157739	0.314799	0.48625	1.92737	0.0621519	0.778214	0.362702	1.35215	0.185076	0.348107	0.638957	2.42988	0.0204199	0.999971	0.781213	3.14181	0.00342632	0.0748921	0.488788	1.83292	0.0754049	0.228685
ARMC9	-0.0680937	-0.334172	0.740261	0.863021	-0.125264	-0.600466	0.552097	0.939679	-0.579273	-2.61164	0.0132211	0.0953143	-0.123144	-0.566349	0.574801	0.999971	-0.354806	-1.72567	0.093303	0.243371	-0.760764	-3.4501	0.00148968	0.0264128
ARMT1	0.106456	0.389039	0.699625	0.839088	0.175309	0.625785	0.53555	0.937274	0.813038	2.72961	0.0098896	0.085392	0.363126	1.24362	0.221977	0.999971	0.781066	2.82887	0.00770962	0.0898957	1.04338	3.52355	0.00121623	0.0236915
ARNTL	0.280413	1.5309	0.134861	0.43128	0.227467	1.21301	0.233319	0.881469	0.289071	1.44984	0.156082	0.314958	0.0677509	0.346632	0.730961	0.999971	0.461133	2.49503	0.0175055	0.114474	0.297778	1.5023	0.142065	0.324291
ARNTL2	-0.0398462	-0.077845	0.938398	0.970598	1.1487	2.19203	0.035178	0.728972	2.02314	3.63108	0.000901358	0.0387666	0.853405	1.56245	0.127258	0.999971	1.69496	3.28176	0.00235657	0.0710007	2.55276	4.60861	5.28556e-05	0.00577202
ARPC2	0.350598	1.55457	0.129123	0.426147	0.309817	1.34185	0.18836	0.866706	0.954157	3.88675	0.000436945	0.0338118	0.280855	1.16705	0.251148	0.999971	0.786765	3.45738	0.00146011	0.0666694	1.1385	4.66499	4.46799e-05	0.00551084
ARR3	-0.428761	-1.77307	0.0849955	0.388505	-0.337668	-1.36395	0.181366	0.864712	-0.823249	-3.12758	0.00355785	0.0584739	-0.315305	-1.22193	0.22997	0.999971	-0.504522	-2.06773	0.0461855	0.171266	-0.415791	-1.58892	0.121149	0.295982
ARRDC4	0.38568	1.02442	0.312726	0.573945	0.823982	2.1378	0.0396561	0.735106	1.51774	3.70353	0.000735346	0.0366774	0.770575	1.91811	0.0633561	0.999971	1.44683	3.80865	0.000546012	0.060598	1.92351	4.7213	3.77653e-05	0.0051391
ASAP1	0.742158	2.96205	0.00548473	0.296933	0.702097	2.7371	0.00970688	0.605307	1.24529	4.56597	6.00046e-05	0.0312363	0.386194	1.44447	0.157577	0.999971	0.94905	3.75394	0.000637723	0.060598	0.999903	3.68783	0.000768596	0.0183362
ASB11	0.125516	0.384251	0.703137	0.841043	0.301688	0.902141	0.373201	0.916355	-0.35098	-0.987112	0.330421	0.496264	-0.526867	-1.51156	0.1397	0.999971	-0.917023	-2.78228	0.00867015	0.0916492	-0.812126	-2.29751	0.0277391	0.13094
ASB7	0.380419	1.93969	0.0605809	0.366479	0.22299	1.11059	0.274381	0.894625	0.678712	3.17923	0.00310204	0.055501	0.133453	0.63768	0.527868	0.999971	0.571919	2.89006	0.00659903	0.0868053	0.548838	2.58601	0.0140702	0.0902913
ASCC3	0.343299	1.43696	0.159684	0.450667	0.281122	1.14939	0.258257	0.888798	0.889458	3.42031	0.00161665	0.045611	0.126102	0.494654	0.623962	0.999971	0.703935	2.92017	0.00610928	0.084986	0.950756	3.67755	0.000791146	0.0185196
ASPHD2	0.157612	0.729026	0.470878	0.689481	0.461083	2.0832	0.0446676	0.744565	0.787882	3.34797	0.00196964	0.0479089	0.293486	1.27218	0.21177	0.999971	0.567395	2.60101	0.0135675	0.104741	0.684037	2.92382	0.00605233	0.0561295
ASPM	-0.0565562	-0.308966	0.759195	0.874358	0.0584126	0.3117	0.757134	0.969454	0.105062	0.527283	0.601352	0.728558	-0.116385	-0.595846	0.555145	0.999971	0.0231567	0.125375	0.90095	0.942868	0.0879212	0.443856	0.659902	0.790436
ASS1P9	-1.17592	-3.13767	0.00346411	0.281881	-0.496874	-1.29501	0.203867	0.87147	-1.57965	-3.87218	0.000455541	0.0340154	0.0211341	0.0528467	0.958157	0.999971	-0.450069	-1.19017	0.242058	0.418333	-0.0105081	-0.02591	0.979478	0.989438
ATAD2B	0.381948	1.72612	0.0932198	0.395328	0.263774	1.16439	0.252208	0.888691	0.604637	2.51033	0.016879	0.104939	0.243027	1.02927	0.310475	0.999971	0.605073	2.71006	0.0103815	0.0966181	0.665608	2.77974	0.00872546	0.0683116
ATF3	0.77612	1.19901	0.238646	0.515436	1.76907	2.66955	0.011474	0.614085	2.41926	3.43356	0.00155893	0.0449308	1.20849	1.74962	0.0890237	0.999971	2.12009	3.24602	0.00259452	0.0713064	2.76645	3.94944	0.000365033	0.0128378
ATF5	0.05404	0.136885	0.891913	0.947428	0.593369	1.46813	0.151076	0.851553	1.6768	3.90203	0.000418249	0.0333748	0.654397	1.55342	0.129397	0.999971	1.33839	3.35989	0.00190679	0.0676484	2.12302	4.9695	1.79413e-05	0.00428135
ATG4A	0.198644	0.929036	0.359288	0.60799	0.287203	1.31203	0.198122	0.870038	0.580957	2.49614	0.0174596	0.106329	0.0795136	0.348502	0.729569	0.999971	0.583035	2.70243	0.0105795	0.0969542	0.594353	2.56873	0.0146706	0.0921822
ATP10A	0.577076	3.36071	0.00190255	0.253418	0.378388	2.15245	0.0383992	0.735106	0.494587	2.64611	0.0121537	0.0923901	-0.0226699	-0.123724	0.902248	0.999971	0.249399	1.43945	0.158984	0.326994	0.105378	0.567108	0.574291	0.729288
ATP13A3	0.678301	1.86221	0.0710587	0.375264	0.803552	2.15486	0.038196	0.735106	1.48448	3.74411	0.00065571	0.0357735	0.544981	1.40215	0.169753	0.999971	1.28854	3.50595	0.00127697	0.0666694	1.65521	4.19931	0.000176901	0.00899562
ATP2C1	0.419818	1.54146	0.132275	0.428431	0.591678	2.12205	0.041048	0.735106	1.10344	3.72208	0.000697843	0.0365195	0.376778	1.29647	0.203368	0.999971	0.973446	3.54231	0.00115457	0.0662867	1.15549	3.92063	0.000396518	0.0134316
ATP5G1P7	-0.433068	-1.06867	0.292594	0.558029	-0.685836	-1.65313	0.107324	0.81971	-0.351506	-0.796873	0.430944	0.588519	1.18591	2.7425	0.00957718	0.999971	0.49176	1.20267	0.237248	0.413458	0.380113	0.8668	0.392006	0.583819
ATP6V0CP1	0.111705	0.194556	0.846875	0.922783	-0.703414	-1.19669	0.239538	0.883969	-0.588182	-0.941135	0.353141	0.517897	0.520161	0.849019	0.40169	0.999971	0.357448	0.617005	0.541259	0.688713	-0.222395	-0.357944	0.722553	0.833386
ATP6V1H	0.326468	1.35029	0.185665	0.470553	0.386267	1.56053	0.127709	0.834218	0.84863	3.22457	0.00274823	0.0538983	0.335996	1.30235	0.201376	0.999971	0.700962	2.87331	0.00688702	0.0876037	0.92016	3.51695	0.00123867	0.0239404
ATP8B5P	-0.329639	-1.41007	0.167419	0.456455	-0.295618	-1.23519	0.225059	0.880255	-0.552496	-2.17119	0.0368426	0.147754	-0.0431279	-0.172889	0.863743	0.999971	-0.512142	-2.17118	0.0368436	0.155604	-0.530188	-2.0958	0.043464	0.168289
ATRNL1	-0.651255	-2.8649	0.00703608	0.300887	-0.405953	-1.74435	0.089951	0.80729	-0.652047	-2.63515	0.0124841	0.0932923	0.216942	0.894353	0.377295	0.999971	-0.489816	-2.13548	0.0398588	0.16085	-0.242785	-0.986958	0.330495	0.526581
ATXN1	0.413782	2.06511	0.0464466	0.351425	0.372771	1.81724	0.0778246	0.797148	0.634938	2.91119	0.00625165	0.0715209	0.238898	1.11735	0.271519	0.999971	0.61969	3.06513	0.00419391	0.0779114	0.645761	2.97825	0.00525968	0.0518862
ATXN2L	0.33819	1.80235	0.0801829	0.383654	0.432307	2.25044	0.030864	0.716919	0.444107	2.17436	0.036585	0.147136	0.0912373	0.455675	0.651462	0.999971	0.586176	3.09605	0.0038666	0.0766054	0.566632	2.79058	0.00849112	0.0673284
AXDND1	-0.667958	-3.2858	0.00233101	0.255198	-0.304947	-1.46526	0.151853	0.85157	-0.689791	-3.11728	0.00365602	0.0591502	0.00877084	0.0404333	0.967979	0.999971	-0.497857	-2.42717	0.0205504	0.122025	-0.409268	-1.86044	0.0713149	0.221704
B4GALNT2	-0.62161	-2.56046	0.0149664	0.314443	-0.531315	-2.13772	0.0396634	0.735106	-0.685439	-2.59379	0.0138072	0.0965932	-0.254947	-0.984139	0.33186	0.999971	-0.50013	-2.04167	0.0488442	0.175889	-0.441704	-1.68131	0.101683	0.269759
B4GALT5	0.280883	0.891087	0.37902	0.621323	0.589282	1.82607	0.0764548	0.794011	1.44477	4.21077	0.000171072	0.0316065	0.447369	1.33005	0.192178	0.999971	0.964592	3.03278	0.00456433	0.0791837	1.20622	3.5362	0.0011743	0.0232355
B9D2	0.189551	1.07564	0.289512	0.555736	0.381119	2.11251	0.0419124	0.735687	0.558399	2.91105	0.0062538	0.0715209	0.169544	0.901629	0.373469	0.999971	0.188625	1.06082	0.296101	0.473587	0.299117	1.56854	0.125829	0.30231
BAALC-AS1	-0.365078	-1.9456	0.0598394	0.365563	0.0306818	0.159716	0.874031	0.986139	-0.382303	-1.87173	0.0696929	0.20109	-0.140334	-0.700871	0.488057	0.999971	-0.31517	-1.66462	0.104994	0.259694	-0.458359	-2.2573	0.0303895	0.137743
BAG1	0.373943	1.93698	0.060923	0.366812	0.298114	1.50834	0.140518	0.843194	0.552225	2.62786	0.0127084	0.0938596	0.185983	0.902816	0.372848	0.999971	0.611641	3.13992	0.00344347	0.0748921	0.537199	2.57141	0.014576	0.0918581
BAK1	0.352587	1.26939	0.212748	0.494426	0.406364	1.42904	0.161934	0.856068	0.968874	3.20453	0.00289956	0.0544378	0.367277	1.23917	0.223599	0.999971	0.877814	3.1321	0.00351553	0.0753984	1.11099	3.69623	0.000750618	0.0181653
BANK1	0.154283	0.567188	0.574238	0.760434	0.324864	1.16657	0.25134	0.888304	0.709726	2.397	0.0220528	0.117988	0.212082	0.730667	0.469887	0.999971	0.874127	3.18484	0.00305604	0.0732541	1.06258	3.60986	0.000956515	0.0208244
BAZ1A	0.438993	1.80845	0.0792095	0.383002	0.34686	1.39573	0.171663	0.861875	1.05216	3.98194	0.000332431	0.0319398	0.28806	1.11208	0.273747	0.999971	0.770026	3.14381	0.00340816	0.07477	0.986273	3.75459	0.000636555	0.016805
BBS5	-0.138172	-0.688341	0.495814	0.707277	-0.359207	-1.74795	0.089317	0.80729	-0.31809	-1.4558	0.154435	0.312967	0.0106737	0.0498319	0.960542	0.999971	-0.0417975	-0.206366	0.837711	0.903571	-0.193522	-0.890909	0.379114	0.572059
BCAP29	0.365898	2.04371	0.0486317	0.355175	0.256533	1.39959	0.170513	0.861471	0.515371	2.64452	0.0122012	0.0923901	0.164234	0.859666	0.395873	0.999971	0.475488	2.6321	0.0125777	0.10205	0.619305	3.19655	0.00296204	0.0378633
BCAR3	0.29457	1.34153	0.188464	0.473303	0.654055	2.90954	0.00627813	0.559855	0.661024	2.76564	0.00903936	0.0819084	0.376955	1.60882	0.116717	0.999971	0.548976	2.4778	0.0182367	0.116369	0.75972	3.19729	0.00295621	0.037852
BCCIP	0.230515	1.22656	0.228247	0.507078	0.147897	0.768681	0.447283	0.923125	0.628952	3.07449	0.00409217	0.0613064	0.290692	1.44953	0.156166	0.999971	0.591422	3.11881	0.00364131	0.0755901	0.843105	4.1456	0.000206906	0.00982752
BCL11A	0.248402	1.13378	0.264658	0.53648	0.568188	2.53318	0.015981	0.640965	0.701248	2.94045	0.00579891	0.0694639	0.322555	1.3797	0.176505	0.999971	0.557475	2.52175	0.0164242	0.111767	0.84977	3.58421	0.0010275	0.0216335
BCL2A1	0.321753	0.718212	0.477435	0.694294	0.807123	1.75982	0.0872525	0.80729	2.07038	4.24567	0.000154466	0.0316065	0.844826	1.76727	0.0859771	0.999971	1.38495	3.06385	0.00420802	0.0779114	2.10991	4.35222	0.000112954	0.00758904
BCL2L14	0.393197	1.46227	0.152664	0.444981	0.790986	2.87333	0.00688673	0.576797	0.469691	1.60471	0.11762	0.267484	0.300418	1.04701	0.302333	0.999971	0.105801	0.389951	0.698956	0.808972	0.322161	1.10715	0.275843	0.473541
BCL3	0.0866586	0.288402	0.774755	0.88415	0.509653	1.65676	0.106584	0.819135	0.922042	2.81906	0.00790326	0.0778109	0.630223	1.96556	0.0573927	0.999971	0.866925	2.85937	0.00713584	0.0882638	1.21017	3.72176	0.000698468	0.0176916
BCL6	0.625903	2.63261	0.012562	0.308921	0.725823	2.982	0.00520874	0.543988	1.07961	4.17169	0.000191757	0.0316065	0.507434	2.00016	0.0533572	0.999971	0.954348	3.97822	0.00033602	0.0593092	1.09314	4.24887	0.000153023	0.00846545
BCL7B	0.324738	1.68069	0.101805	0.402688	0.244274	1.23489	0.225168	0.880255	0.538766	2.56166	0.0149233	0.0995858	0.167572	0.812756	0.421899	0.999971	0.536272	2.75069	0.00938359	0.093584	0.688636	3.29352	0.0022829	0.033123
BCRP2	-0.44445	-1.07119	0.29148	0.557334	-0.261585	-0.615819	0.542032	0.937437	-0.827252	-1.83167	0.0755962	0.210159	0.0607264	0.137159	0.891697	0.999971	-0.0984936	-0.235263	0.815388	0.888674	-0.173214	-0.385783	0.702013	0.819385
BDNF-AS	-0.359154	-1.60615	0.117303	0.415774	-0.315671	-1.37892	0.176742	0.863307	-0.42502	-1.74616	0.0896316	0.230454	-0.081895	-0.343219	0.733505	0.999971	-0.419455	-1.85907	0.0715143	0.211869	-0.360696	-1.49061	0.145097	0.327739
BEST1	0.305469	1.52064	0.137409	0.433182	0.464135	2.25686	0.0304203	0.715094	0.652247	2.98291	0.00519649	0.066726	0.295903	1.38044	0.176281	0.999971	0.442459	2.18291	0.035898	0.153974	0.478366	2.20059	0.0345145	0.148244
BHLHE40	0.492207	1.50377	0.141687	0.436097	0.726842	2.16907	0.037016	0.735106	1.55821	4.37349	0.000106094	0.0312363	0.444998	1.27409	0.211099	0.999971	1.21771	3.68708	0.000770214	0.0613331	1.74112	4.91565	2.1094e-05	0.00438621
BHLHE41	0.870868	2.41708	0.021042	0.32041	0.938889	2.54537	0.0155199	0.638891	1.13018	2.88173	0.00674074	0.0733947	0.850767	2.21287	0.0335811	0.999971	1.37028	3.76921	0.000610728	0.060598	1.31185	3.36465	0.00188222	0.0299215
BICDL1	0.379036	1.89892	0.0659147	0.372083	0.523874	2.56361	0.0148533	0.638565	0.774765	3.56585	0.00108143	0.0401541	0.240021	1.12689	0.267522	0.999971	0.518373	2.57378	0.014493	0.106966	0.701339	3.24691	0.00258831	0.0353113
BID	0.203988	0.670721	0.506838	0.715074	0.546495	1.75518	0.0880537	0.80729	1.35575	4.09528	0.000239505	0.0316065	0.595729	1.83566	0.0749895	0.999971	1.32442	4.31584	0.000125719	0.0552022	1.70192	5.17122	9.76972e-06	0.00404174
BIRC3	0.412874	1.26204	0.215351	0.496826	0.633185	1.89053	0.0670612	0.78595	1.11172	3.12188	0.00361188	0.0588944	0.617634	1.76926	0.0856385	0.999971	1.23172	3.73137	0.000679776	0.0608829	1.20501	3.4038	0.00169142	0.0281344
BISPR	0.362849	1.35862	0.183033	0.468439	0.471877	1.72584	0.0932716	0.811733	0.877415	3.01818	0.0047415	0.0647277	0.21327	0.748358	0.459287	0.999971	0.531843	1.9736	0.0564318	0.188747	0.637807	2.20688	0.0340331	0.147093
BLACAT1	-0.25835	-0.810583	0.42313	0.655924	-0.546285	-1.6742	0.103083	0.81513	-0.654117	-1.88544	0.0677657	0.198017	-0.0736391	-0.216523	0.829848	0.999971	-0.440774	-1.37059	0.179304	0.350567	-0.379663	-1.10079	0.278566	0.476189
BMP3	-0.743284	-2.73506	0.00975642	0.300887	-0.407029	-1.46297	0.152474	0.85192	-0.523767	-1.77059	0.0854145	0.22437	0.301553	1.03988	0.305589	0.999971	-0.12977	-0.473247	0.639	0.765485	-0.296243	-1.00734	0.320743	0.517372
BMPR1APS1	-0.378804	-1.3226	0.19462	0.47876	0.0328634	0.112079	0.911407	0.990328	-0.246703	-0.791324	0.434131	0.591436	0.780633	2.55427	0.0151914	0.999971	-0.180747	-0.625442	0.535773	0.684145	0.510002	1.64551	0.108893	0.2799
BMPR1B-AS1	-0.12936	-0.229498	0.819829	0.908204	-0.959378	-1.66251	0.105418	0.816763	-1.08744	-1.77235	0.0851164	0.224014	0.397034	0.660102	0.513546	0.999971	-0.812053	-1.42779	0.16229	0.330926	-0.382241	-0.626659	0.534984	0.699212
BMT2	0.197472	0.787678	0.436233	0.665035	0.308689	1.20271	0.237229	0.883913	0.635893	2.3302	0.0257393	0.125666	0.474073	1.77212	0.0851547	0.999971	0.880579	3.48108	0.00136781	0.0666694	1.06158	3.91301	0.000405287	0.0135583
BNC2	-0.399374	-1.74508	0.0898216	0.393258	-0.721012	-3.07735	0.00406151	0.52243	-0.638559	-2.56333	0.0148632	0.0994155	-0.206989	-0.847598	0.40247	0.999971	-0.413933	-1.79254	0.081768	0.226962	-0.489446	-1.97632	0.0561097	0.193284
BOLA3	0.133495	0.652983	0.51807	0.722245	0.43615	2.08387	0.0446023	0.74396	0.723873	3.25287	0.00254721	0.0526723	0.296316	1.35831	0.183131	0.999971	0.590903	2.86455	0.00704239	0.0881248	0.79848	3.60927	0.000958094	0.0208255
BORA	0.189874	1.02631	0.311845	0.573183	-0.00846574	-0.0446969	0.964605	0.995642	0.221146	1.09815	0.279701	0.447301	0.0526994	0.266948	0.791089	0.999971	0.272371	1.45907	0.153538	0.32075	0.408169	2.03878	0.0491471	0.179669
BORCS8	0.227246	1.52214	0.137035	0.433044	0.045586	0.298256	0.767286	0.970728	0.208236	1.28139	0.208552	0.373653	0.247607	1.55428	0.129192	0.999971	0.475714	3.15797	0.00328246	0.0744336	0.224044	1.38679	0.174351	0.363483
BPIFB1	-0.565375	-2.10937	0.0422001	0.346344	-0.531735	-1.9378	0.0608188	0.778214	-0.789661	-2.7066	0.010471	0.0871855	-0.0238255	-0.0833036	0.934089	0.999971	-0.400094	-1.47938	0.148059	0.314229	-0.495884	-1.70967	0.0962554	0.261566
BRCA2	0.572054	3.16187	0.00324865	0.275329	0.490318	2.64718	0.0121217	0.616116	0.545685	2.77087	0.00892167	0.0814917	0.208864	1.08188	0.286768	0.999971	0.50349	2.75804	0.0092127	0.0930088	0.462196	2.36076	0.0239889	0.121466
BTG2	0.572287	2.43342	0.0202507	0.32041	0.50822	2.11083	0.0420655	0.735687	1.24064	4.84637	2.59702e-05	0.0305198	0.451953	1.80095	0.0804061	0.999971	1.02198	4.30675	0.000129123	0.0552022	1.31926	5.18384	9.40451e-06	0.00404174
BTG3	0.355213	1.30238	0.201366	0.485239	0.670301	2.40058	0.0218694	0.678604	1.01304	3.41224	0.0016528	0.0459529	0.399216	1.37171	0.178959	0.999971	1.06644	3.87514	0.000451699	0.0593092	0.985385	3.33865	0.0020202	0.0310406
BTG4	-0.90459	-2.8725	0.00690135	0.300887	-0.708946	-2.19897	0.0346388	0.728972	-0.755498	-2.20398	0.0342539	0.142552	-0.0602314	-0.179241	0.858791	0.999971	-0.753752	-2.37214	0.023365	0.1282	-0.60743	-1.78247	0.0834247	0.241609
BTN2A1	0.265327	1.38091	0.176137	0.463451	0.346151	1.75974	0.087266	0.80729	0.506083	2.41976	0.0209102	0.115475	0.358446	1.74829	0.089257	0.999971	0.629662	3.24783	0.00258192	0.0713064	0.699133	3.36249	0.00189335	0.0300193
BTN2A2	0.0373759	0.153158	0.879161	0.940456	0.124615	0.498788	0.621076	0.948782	0.662544	2.49419	0.0175408	0.106549	0.171104	0.657075	0.515468	0.999971	0.783585	3.18227	0.00307704	0.0733977	1.07422	4.06779	0.000259387	0.01082
BTN3A1	0.386676	1.76289	0.0867239	0.390122	0.203244	0.905095	0.371656	0.916323	0.812089	3.40134	0.00170285	0.0463749	0.212656	0.908579	0.36984	0.999971	0.577371	2.60878	0.0133136	0.104064	0.82103	3.45903	0.00145349	0.0260974
BTN3A3	0.355742	1.53803	0.133111	0.429442	0.297242	1.25528	0.217766	0.876867	0.766138	3.04302	0.00444392	0.0629534	0.206268	0.835736	0.409021	0.999971	0.692793	2.9685	0.00539405	0.0828581	0.92676	3.70267	0.00073713	0.0180747
BUD31	0.250945	1.20032	0.238143	0.514949	0.157898	0.737726	0.465641	0.925927	0.631341	2.77429	0.00884564	0.0812388	0.107624	0.482431	0.632529	0.999971	0.444814	2.10863	0.0422674	0.165026	0.759234	3.35593	0.00192746	0.0303358
C10orf120	-0.66607	-1.77515	0.0846462	0.388196	-1.13376	-2.95144	0.00563704	0.552625	-0.955132	-2.33854	0.0252506	0.12479	-0.0630334	-0.157431	0.875817	0.999971	-0.312789	-0.826169	0.414352	0.581884	-0.443132	-1.09135	0.282639	0.479922
C11orf70	-0.471785	-1.7009	0.0979085	0.399023	-0.400303	-1.40968	0.167534	0.857085	-0.456493	-1.51194	0.139603	0.294515	-0.371413	-1.25486	0.217914	0.999971	-0.600434	-2.14537	0.0390025	0.159512	-0.854965	-2.84839	0.00733767	0.0624328
C12orf50	-0.37563	-1.38347	0.175357	0.462831	-0.227787	-0.819476	0.418108	0.921976	-0.455585	-1.54151	0.132264	0.285855	0.054817	0.189204	0.851035	0.999971	-0.387404	-1.41409	0.166245	0.335895	0.000653148	0.00222299	0.998239	0.999051
C12orf75	0.104666	0.478659	0.635183	0.799916	0.224111	1.00111	0.323702	0.907865	0.356395	1.49734	0.143346	0.299396	0.027805	0.119166	0.905831	0.999971	0.465595	2.11024	0.0421196	0.164822	0.597497	2.52508	0.0162942	0.0976441
C14orf39	-0.863519	-2.70404	0.0105375	0.301574	-0.522902	-1.59941	0.118795	0.827066	-0.862758	-2.48198	0.0180571	0.10802	0.253787	0.744761	0.46143	0.999971	-0.253404	-0.786426	0.436956	0.600649	-0.274942	-0.795609	0.431668	0.616329
C15orf48	0.352441	0.382889	0.704138	0.841557	1.9472	2.06631	0.0463265	0.750404	3.98426	3.9765	0.000337683	0.0319442	1.92016	1.95493	0.0586845	0.999971	3.11875	3.35792	0.00191705	0.0677201	5.04424	5.06407	1.34964e-05	0.00412098
C16orf91	0.26864	1.05233	0.29992	0.564639	0.364087	1.39311	0.172447	0.862237	0.800168	2.87959	0.00677773	0.0734461	0.292516	1.07383	0.290307	0.999971	0.598972	2.32537	0.0260267	0.134154	0.873097	3.16054	0.00326014	0.0398082
C17orf49	0.173267	0.638946	0.527054	0.727973	0.74615	2.68764	0.0109735	0.609088	0.9709	3.28919	0.00230977	0.0511732	0.921934	3.18605	0.00304614	0.942616	0.978776	3.57712	0.00104802	0.0643192	0.916348	3.12266	0.00360441	0.0422278
C17orf58	0.180558	0.612643	0.544107	0.739539	0.451424	1.49615	0.143655	0.84526	0.965185	3.00863	0.00486083	0.0652788	0.424433	1.3496	0.185882	0.999971	0.632402	2.12661	0.0406408	0.162212	0.834268	2.61586	0.0130861	0.0865551
C17orf64	-0.634329	-2.35993	0.0240346	0.323375	-0.319031	-1.15935	0.254227	0.888798	-0.703772	-2.40538	0.0216253	0.116868	-0.299585	-1.04451	0.303472	0.999971	-0.758745	-2.79759	0.00834278	0.0913514	-0.643805	-2.21339	0.0335422	0.14582
C18orf25	0.451172	2.1254	0.0407488	0.345138	0.305216	1.40444	0.169075	0.859601	0.643831	2.78636	0.00858168	0.0804552	0.1621	0.71563	0.479008	0.999971	0.517447	2.41583	0.0211034	0.123034	0.528783	2.30194	0.0274604	0.130132
C18orf8	0.348558	1.65208	0.107539	0.40752	0.242481	1.12262	0.269306	0.892291	0.602345	2.62282	0.0128659	0.0942581	0.254445	1.1302	0.266143	0.999971	0.651882	3.06216	0.00422671	0.0779214	0.747068	3.27215	0.00241839	0.0341832
C19orf12	0.34749	1.66219	0.105483	0.40538	0.196928	0.92012	0.363862	0.914877	0.554775	2.43794	0.020037	0.113212	0.105064	0.470976	0.640605	0.999971	0.495337	2.34824	0.0246926	0.131305	0.63051	2.78707	0.00856643	0.0676618
C19orf66	0.356782	1.68886	0.100215	0.400887	0.333507	1.54203	0.132138	0.838365	0.692445	3.01121	0.00482826	0.0652521	0.184666	0.819188	0.41827	0.999971	0.424054	1.98936	0.0545897	0.185743	0.606786	2.65425	0.0119135	0.0820023
C1GALT1C1	0.411675	1.50371	0.141704	0.436118	0.327451	1.1683	0.250651	0.887811	0.949484	3.18613	0.00304549	0.0552662	0.189213	0.647689	0.521449	0.999971	0.509461	1.84426	0.073696	0.215145	0.950841	3.20948	0.00286149	0.0371922
C1orf105	-0.332839	-1.24696	0.220764	0.501035	-0.147909	-0.541265	0.591783	0.944589	-0.464107	-1.59736	0.119253	0.269567	-0.101482	-0.356299	0.723774	0.999971	-0.639437	-2.3742	0.0232532	0.127914	-0.450126	-1.55836	0.128222	0.305619
C1orf111	-0.215294	-1.00909	0.319915	0.579646	-0.0923786	-0.42293	0.674956	0.956646	-0.415759	-1.79023	0.0821461	0.21973	0.14185	0.623069	0.537313	0.999971	-0.726239	-3.3735	0.00183736	0.0669683	-0.595458	-2.5791	0.0143078	0.0910408
C1orf122	0.150536	0.463382	0.645984	0.806589	0.531525	1.59816	0.119075	0.827582	0.982833	2.77936	0.00873387	0.0807009	0.631034	1.82036	0.0773383	0.999971	1.2585	3.83932	0.000500342	0.060598	1.29074	3.6716	0.00080451	0.0186663
C1orf127	-0.219822	-0.807688	0.424772	0.656788	-0.19052	-0.683774	0.498659	0.932231	-0.517049	-1.74531	0.0897817	0.230595	-0.573003	-1.97304	0.0564983	0.999971	-0.825997	-3.00784	0.00487085	0.0807178	-0.73194	-2.48523	0.0179183	0.102585
C1orf141	-0.850152	-3.0476	0.00439102	0.287586	-0.411308	-1.44021	0.158769	0.855535	-0.646883	-2.13036	0.0403082	0.153387	-0.41411	-1.39118	0.173027	0.999971	-0.165028	-0.586302	0.561467	0.705074	-0.484136	-1.60378	0.117826	0.291886
C1orf147	0.305019	1.29604	0.203517	0.487345	0.274884	1.14088	0.261734	0.888798	0.553567	2.16086	0.0376933	0.149337	0.123163	0.490431	0.626916	0.999971	0.399771	1.68347	0.101262	0.254554	0.632986	2.48543	0.0179097	0.102563
C1orf185	-0.57777	-1.48157	0.147479	0.440781	-0.412781	-1.03392	0.308327	0.906095	-0.568981	-1.34039	0.188827	0.352263	0.000683715	0.00164304	0.998698	0.999971	-0.43206	-1.09803	0.279752	0.456615	-0.330481	-0.783124	0.438866	0.622648
C1orf27	0.467442	2.08709	0.0442924	0.349596	0.29504	1.28675	0.206699	0.873224	0.460051	1.88707	0.0675395	0.197708	0.122925	0.514351	0.610267	0.999971	0.476887	2.11024	0.0421198	0.164822	0.564067	2.32735	0.0259084	0.126304
C1orf54	0.562544	1.49354	0.144333	0.437983	1.18679	3.07776	0.0040572	0.52243	1.76065	4.29438	0.000133901	0.0313171	0.807735	2.00972	0.0522869	0.999971	1.35793	3.57305	0.00105996	0.0646282	1.76882	4.33973	0.000117188	0.00765774
C1QA	-0.619086	-1.58456	0.122137	0.420126	-1.1961	-2.99037	0.005097	0.542217	-0.416104	-0.978426	0.334636	0.500261	-1.0188	-2.44375	0.019765	0.999971	-0.767228	-1.94619	0.0597649	0.193986	-0.23202	-0.548784	0.586667	0.738455
C1QB	-0.488439	-1.34935	0.185964	0.470947	-1.35474	-3.65566	0.000841329	0.451754	-0.778993	-1.97703	0.0560263	0.179371	-1.22141	-3.16214	0.00324633	0.942616	-1.11149	-3.04313	0.00444265	0.0790873	-0.822466	-2.09966	0.0431014	0.167393
C1QC	-0.481403	-1.31681	0.196532	0.480447	-1.18961	-3.17848	0.00310821	0.508184	-0.396621	-0.996687	0.325816	0.491986	-1.02876	-2.63716	0.012423	0.999971	-0.859992	-2.33138	0.0256697	0.133392	-0.461671	-1.16699	0.251173	0.448756
C1S	-0.255434	-0.699522	0.488889	0.7022	0.746649	1.99728	0.0536838	0.766897	0.818572	2.05943	0.0470179	0.164351	0.342982	0.88024	0.384785	0.999971	0.63092	1.71238	0.0957503	0.246458	0.85456	2.16263	0.0375463	0.155166
C21orf91	0.417279	1.86108	0.0712218	0.375274	0.254423	1.10839	0.275315	0.894625	0.674582	2.76402	0.00907604	0.0820582	0.130717	0.546359	0.588315	0.999971	0.635426	2.80871	0.00811237	0.0906517	0.643843	2.6536	0.0119324	0.0820892
C2CD4C	-0.37933	-1.17541	0.247833	0.52295	-0.267712	-0.810284	0.423299	0.921976	-0.526326	-1.49828	0.143103	0.299053	-0.103881	-0.301658	0.764713	0.999971	-0.41474	-1.27365	0.211253	0.385788	-0.597462	-1.7108	0.0960456	0.261276
C2orf73	-0.755508	-2.28903	0.0282802	0.331015	-0.459908	-1.36107	0.182264	0.865114	-0.542756	-1.51072	0.139913	0.29495	-0.0473446	-0.134428	0.893841	0.999971	-0.360812	-1.08342	0.286093	0.46347	-0.460209	-1.2885	0.206096	0.399519
C3	0.106454	0.253259	0.801562	0.898768	1.24098	2.88379	0.00670549	0.57194	1.46634	3.20481	0.00289743	0.0544256	0.992199	2.21211	0.0336381	0.999971	1.58129	3.72834	0.000685614	0.0608829	2.05589	4.5198	6.88234e-05	0.00625794
C3orf30	-0.526182	-1.64688	0.108611	0.407855	-0.506651	-1.54893	0.13047	0.837636	-0.883638	-2.54078	0.0156921	0.101553	-0.535487	-1.57065	0.125338	0.999971	-0.950903	-2.94961	0.00566366	0.0835593	-0.946831	-2.73851	0.00967282	0.0727676
C4orf26	-0.392632	-1.70456	0.0972162	0.398497	-0.273678	-1.16055	0.253747	0.888798	-0.539851	-2.15311	0.0383433	0.150181	0.018397	0.0748478	0.940766	0.999971	-0.0834536	-0.359066	0.721722	0.825589	0.0127297	0.0510693	0.959563	0.979209
C5orf46	-0.0795864	-0.24144	0.810635	0.903915	-0.0419184	-0.124215	0.901862	0.989848	-0.0533383	-0.148654	0.882687	0.928784	0.723717	2.05753	0.0472107	0.999971	-0.212134	-0.6378	0.52779	0.677299	0.46586	1.306	0.200144	0.392536
C5orf56	0.521138	2.10254	0.0428324	0.346664	0.580881	2.28916	0.0282719	0.706108	0.834818	3.09421	0.0038854	0.0601058	0.105116	0.397435	0.693481	0.999971	0.758199	3.03163	0.00457806	0.0791837	0.796175	2.96836	0.00539603	0.0526958
C6orf106	0.522681	2.18201	0.0359704	0.342047	0.487936	1.98967	0.0545539	0.768726	1.09861	4.21337	0.000169778	0.0316065	0.331369	1.2964	0.203394	0.999971	0.834577	3.45294	0.00147807	0.0666694	1.08313	4.17848	0.000187995	0.00937602
C8A	-0.397279	-1.38703	0.174279	0.461749	-0.138943	-0.47383	0.638589	0.950488	-0.570734	-1.83059	0.0757616	0.210482	-0.346481	-1.13364	0.264718	0.999971	-0.963814	-3.33492	0.00204077	0.0686027	-0.659492	-2.12773	0.0405415	0.161796
C8orf17	0.0117013	0.0463229	0.963318	0.981986	-0.0683153	-0.264167	0.793214	0.974779	-0.579722	-2.10838	0.0422913	0.156751	-0.127717	-0.473825	0.638593	0.999971	-0.251521	-0.986822	0.330561	0.506756	-0.175712	-0.642806	0.524575	0.691239
C8orf76	0.406506	1.86583	0.0705362	0.374805	0.391689	1.75609	0.087897	0.80729	0.687458	2.89881	0.00645299	0.0722678	-0.0300153	-0.129109	0.898017	0.999971	0.246275	1.12029	0.270285	0.446693	0.597624	2.53484	0.0159173	0.096386
C9orf43	-0.196328	-0.875702	0.387214	0.628198	-0.0455216	-0.198331	0.843944	0.982322	-0.23459	-0.961281	0.343061	0.5082	-0.112152	-0.468801	0.642143	0.999971	-0.309557	-1.36841	0.179978	0.351344	-0.346045	-1.42634	0.162705	0.349191
C9orf92	-1.10028	-2.17222	0.0367591	0.342292	-0.840746	-1.62131	0.114005	0.826226	-1.66509	-3.02001	0.00471898	0.0646891	-0.127492	-0.23588	0.814912	0.999971	-0.850743	-1.66457	0.105003	0.259694	-1.0296	-1.8784	0.0687487	0.216915
CA10	-0.706531	-2.5211	0.0164499	0.31562	-0.680929	-2.37334	0.0232997	0.691302	-0.830328	-2.72193	0.0100803	0.0858622	-0.0916637	-0.306523	0.761038	0.999971	-0.284515	-1.00616	0.321302	0.497824	-0.402141	-1.32603	0.193491	0.384766
CA2	0.723721	1.47768	0.148512	0.441872	1.51054	3.0126	0.00481084	0.537266	2.57038	4.82141	2.79883e-05	0.0305198	1.23687	2.36669	0.0236618	0.999971	2.02636	4.10044	0.000235949	0.0593092	2.83513	5.34933	5.70424e-06	0.00359628
CA5BP1	0.45764	2.5598	0.0149904	0.314443	0.344636	1.88296	0.0681101	0.785976	0.616645	3.16872	0.00319002	0.056246	0.344711	1.80694	0.0794492	0.999971	0.548324	3.03964	0.0044833	0.0790873	0.630339	3.25817	0.00251119	0.0348265
CA6	0.0565231	0.268429	0.789958	0.892451	0.293831	1.36301	0.181658	0.864712	0.300069	1.30916	0.199084	0.363974	0.285517	1.2707	0.212288	0.999971	0.475559	2.23826	0.0317222	0.14556	0.69153	3.03481	0.00454019	0.0479442
CABLES1	-0.0544222	-0.261626	0.795156	0.894947	-0.114235	-0.536417	0.595093	0.945321	-0.194493	-0.858966	0.396254	0.55762	-0.374448	-1.68695	0.100583	0.999971	-0.509997	-2.42983	0.0204222	0.121739	-0.512314	-2.27593	0.0291347	0.134641
CACNA2D3	-0.53378	-2.46878	0.0186306	0.316803	-0.319704	-1.44433	0.157615	0.855535	-0.714138	-3.03438	0.00454529	0.0636133	-0.487588	-2.11339	0.0418313	0.999971	-0.736551	-3.37619	0.00182395	0.0669683	-0.569789	-2.4353	0.0201617	0.109792
CACNG4	-0.500922	-1.59349	0.120119	0.418233	-0.188342	-0.585227	0.562181	0.940516	-0.784745	-2.29338	0.0280017	0.130663	-0.218667	-0.651884	0.518771	0.999971	-0.801773	-2.52775	0.0161902	0.111228	-0.707416	-2.07956	0.0450205	0.171824
CALHM3	-0.0288697	-0.0660589	0.94771	0.974913	0.0662363	0.148042	0.883167	0.987303	-0.391667	-0.823329	0.415943	0.575599	-0.103633	-0.222225	0.825441	0.999971	-0.112851	-0.255916	0.799527	0.87852	-0.320446	-0.677581	0.50253	0.673345
CAMK2D	0.310508	1.47607	0.148941	0.441975	0.251873	1.16954	0.250156	0.887438	0.657631	2.87201	0.00690997	0.0739192	0.221976	0.988891	0.329562	0.999971	0.671156	3.162	0.0032475	0.0742364	0.815869	3.58405	0.00102798	0.0216335
CAMKMT	0.158398	1.1481	0.25878	0.531559	0.0602827	0.426798	0.672163	0.956261	-0.0180347	-0.12009	0.905104	0.943153	0.0140886	0.0956984	0.924311	0.999971	0.0591668	0.425023	0.673444	0.790648	0.00200778	0.0134482	0.989347	0.994706
CAMSAP2	0.608901	2.24637	0.0311484	0.334988	0.536289	1.93256	0.0614857	0.778214	0.773399	2.62124	0.0129156	0.094409	0.478891	1.65569	0.106802	0.999971	0.960924	3.5134	0.00125092	0.0665296	0.974499	3.32226	0.00211206	0.0317217
CARS	0.248102	1.55373	0.129323	0.426523	0.181103	1.10782	0.275558	0.894625	0.524462	3.01735	0.0047517	0.0647742	0.155426	0.912166	0.367975	0.999971	0.448838	2.78572	0.00859545	0.0916492	0.477525	2.7635	0.00908791	0.0700434
CASP4	0.158949	0.617556	0.5409	0.737449	0.210062	0.797195	0.430759	0.922555	0.92871	3.31486	0.00215483	0.0495406	0.287023	1.04506	0.30322	0.999971	0.80109	3.08463	0.00398458	0.0774345	1.22434	4.3958	9.9337e-05	0.00716754
CASP7	0.16065	0.569096	0.572956	0.75975	0.412055	1.4258	0.162861	0.856821	1.19589	3.89192	0.000430533	0.0337435	0.336663	1.11765	0.271395	0.999971	0.888466	3.11923	0.0036372	0.0755901	1.24182	4.06519	0.000261355	0.0108222
CCDC12	0.331867	2.03636	0.0494019	0.356534	0.199272	1.19436	0.240437	0.883969	0.474216	2.67323	0.0113705	0.0900764	0.166869	0.959564	0.343913	0.999971	0.505685	3.07521	0.00408439	0.077717	0.607548	3.44501	0.00151067	0.0265465
CCDC144NL-AS1	-0.326981	-1.43828	0.159313	0.450299	-0.247356	-1.06278	0.295224	0.903784	-0.54117	-2.18686	0.0355849	0.145311	0.0432707	0.17837	0.85947	0.999971	-0.33448	-1.45812	0.1538	0.321073	-0.358528	-1.45734	0.154014	0.338637
CCDC146	0.326445	2.02003	0.0511538	0.358515	0.204401	1.23546	0.224957	0.880255	0.490022	2.78568	0.00859646	0.0804552	-0.000563213	-0.00326608	0.997413	0.999971	0.123202	0.755559	0.455012	0.616131	0.233769	1.33676	0.19	0.381207
CCDC149	-0.130938	-0.794598	0.432248	0.662011	-0.331943	-1.96762	0.0571448	0.773859	-0.227249	-1.26692	0.213621	0.379238	-0.225953	-1.28501	0.207301	0.999971	-0.283104	-1.70267	0.0975735	0.24911	-0.192467	-1.07933	0.287885	0.485032
CCDC159	0.220243	1.53357	0.134203	0.430294	0.100782	0.68546	0.497608	0.93175	0.204062	1.30536	0.200359	0.365179	0.0375094	0.244764	0.808081	0.999971	0.240091	1.65683	0.106569	0.261765	0.431243	2.77485	0.00883314	0.0688788
CCDC18	0.290516	1.82433	0.0767228	0.381044	0.0835587	0.512535	0.611524	0.947185	0.0375411	0.216575	0.829808	0.894291	0.154476	0.909076	0.369581	0.999971	0.324182	2.01755	0.0514238	0.18028	0.187841	1.09003	0.28321	0.480393
CCDC191	0.0333398	0.237926	0.813338	0.904921	0.303193	2.11347	0.041824	0.735687	0.0952835	0.624688	0.536262	0.675693	0.11791	0.788565	0.435721	0.999971	0.278885	1.97245	0.0565683	0.188996	0.377661	2.49056	0.0176926	0.10203
CCDC28B	-0.0817119	-0.417645	0.67878	0.826276	0.16704	0.833952	0.410012	0.920794	0.521041	2.44659	0.0196331	0.112176	0.176532	0.845573	0.403584	0.999971	0.438319	2.22032	0.0330259	0.148276	0.79114	3.73673	0.000669541	0.0172494
CCDC40	-0.545687	-2.06106	0.0468534	0.352163	-0.310736	-1.1464	0.259472	0.888798	-0.922845	-3.20216	0.00291799	0.0544981	-0.193312	-0.684244	0.498365	0.999971	-0.36049	-1.34941	0.185945	0.357728	-0.74436	-2.59805	0.0136653	0.0887375
CCDC50	0.323264	1.23244	0.226071	0.505449	0.223438	0.832078	0.411055	0.920794	0.7676	2.6885	0.0109503	0.0886546	-0.0130803	-0.0467339	0.962993	0.999971	0.608114	2.29771	0.0277262	0.137921	0.718992	2.53308	0.0159848	0.0966306
CCDC68	-0.496243	-2.75952	0.00917887	0.300887	-0.254088	-1.38014	0.176372	0.863307	-0.254581	-1.30057	0.201978	0.366831	-0.116058	-0.604814	0.549237	0.999971	-0.329975	-1.81854	0.0776213	0.220811	-0.400436	-2.05773	0.0471898	0.176234
CCDC69	0.347424	2.07086	0.0458742	0.351339	0.17162	0.999215	0.324608	0.907964	0.508798	2.78615	0.00858627	0.0804552	0.101922	0.569334	0.572797	0.999971	0.513381	3.03273	0.0045649	0.0791837	0.605483	3.33512	0.00203966	0.0311487
CCDC88A	0.765406	2.70358	0.0105495	0.301574	0.669331	2.30934	0.027	0.706108	1.03535	3.35973	0.00190765	0.0475402	0.560043	1.85385	0.0722765	0.999971	1.15353	4.03812	0.000282657	0.0593092	1.2286	4.01028	0.000306339	0.0116625
CCDC88B	0.401526	2.42477	0.0206662	0.32041	0.296891	1.75127	0.0887356	0.80729	0.498825	2.7674	0.00899949	0.0817681	0.248716	1.40756	0.168156	0.999971	0.555851	3.32674	0.00208656	0.0688096	0.618097	3.4493	0.00149294	0.0264128
CCL1	0.40134	1.3693	0.179704	0.46561	0.82187	2.73897	0.00966183	0.604448	0.473151	1.48304	0.147091	0.303701	0.748434	2.39301	0.0222584	0.999971	0.748792	2.53192	0.0160293	0.110744	0.827142	2.60785	0.0133437	0.0875673
CCL2	-0.651881	-0.815768	0.420197	0.654146	1.12061	1.36978	0.179556	0.864435	3.10361	3.56806	0.00107478	0.0401541	1.82518	2.14047	0.0394241	0.999971	2.95516	3.66506	0.000819416	0.0618203	4.56208	5.27568	7.12661e-06	0.003804
CCL24	0.991168	0.94047	0.353478	0.604011	2.43498	2.2568	0.0304245	0.715094	4.62821	4.03439	0.000285728	0.0316065	2.10285	1.86988	0.0699569	0.999971	4.04705	3.80574	0.00055055	0.060598	5.3969	4.73215	3.656e-05	0.0050867
CCL3	0.191084	0.258735	0.797369	0.896234	1.75541	2.32171	0.0262457	0.706108	3.67148	4.56709	5.98042e-05	0.0312363	1.40503	1.78289	0.0833549	0.999971	2.65756	3.56629	0.0010801	0.0646282	4.12143	5.15699	1.01983e-05	0.00404174
CCL3L3	0.271511	0.477946	0.635686	0.800193	1.34055	2.305	0.027269	0.706108	2.00815	3.24753	0.00258403	0.0527614	0.739267	1.21955	0.230861	0.999971	1.44994	2.52955	0.0161207	0.110949	1.80254	2.93219	0.00592352	0.0556754
CCL4	0.438437	0.797167	0.430775	0.660773	1.57852	2.80343	0.00822092	0.59821	2.54044	4.24345	0.000155471	0.0316065	1.01577	1.73079	0.0923735	0.999971	1.94129	3.49813	0.00130488	0.0666694	2.73936	4.60267	5.37991e-05	0.00577202
CCL4L2	0.322173	0.620248	0.539146	0.736666	1.36143	2.56018	0.0149766	0.638565	2.23124	3.9463	0.000368348	0.0326394	0.815902	1.47205	0.15002	0.999971	1.6104	3.07265	0.00411194	0.077884	2.33346	4.15139	0.000203443	0.00972044
CCL8	0.301467	0.33341	0.740831	0.863397	1.65491	1.78776	0.0825502	0.799758	4.04943	4.11433	0.000226613	0.0316065	1.35973	1.40928	0.167651	0.999971	2.3004	2.52141	0.0164378	0.111771	3.32895	3.40222	0.00169875	0.0281908
CCND2	0.42452	1.44977	0.1561	0.446964	0.354364	1.18209	0.245208	0.886529	1.0614	3.33002	0.00206806	0.0488051	0.18155	0.581037	0.56497	0.999971	0.783709	2.65253	0.0119639	0.100342	1.12539	3.55159	0.00112518	0.0227397
CCNE1	0.138838	0.656478	0.515847	0.720729	0.280809	1.29695	0.203206	0.871278	0.273456	1.18787	0.242953	0.409848	0.307386	1.36208	0.181949	0.999971	0.5155	2.41571	0.0211096	0.123034	0.511704	2.23588	0.0318925	0.141642
CCNL1	0.588758	2.25893	0.0302783	0.333616	0.330129	1.23722	0.224313	0.880026	0.502586	1.77151	0.0852588	0.224202	0.235173	0.845589	0.403575	0.999971	0.66146	2.51519	0.0166839	0.112441	0.430686	1.52702	0.135821	0.316112
CCR5	0.223613	0.515674	0.609352	0.783589	0.742295	1.67206	0.103506	0.81513	1.89371	4.01197	0.000304848	0.031689	0.613214	1.32525	0.193749	0.999971	1.47427	3.36944	0.00185784	0.0669683	2.33202	4.96967	1.79325e-05	0.00428135
CCR8	0.323273	1.09161	0.282526	0.549901	-0.209211	-0.690051	0.494751	0.930893	0.0920047	0.285414	0.777024	0.858258	-0.0360482	-0.114074	0.909836	0.999971	0.256657	0.858924	0.396277	0.566655	0.611743	1.9089	0.0645722	0.20924
CCS	0.295133	1.6128	0.115846	0.414642	0.197829	1.05597	0.298278	0.904043	0.486233	2.44105	0.0198909	0.112761	-0.113481	-0.581155	0.564892	0.999971	0.222794	1.20662	0.23574	0.412015	0.37659	1.90174	0.0655337	0.21105
CD160	0.479657	2.42082	0.0208582	0.32041	0.661608	3.26161	0.00248803	0.494801	0.64994	3.01351	0.00479946	0.0651857	0.338284	1.6	0.118665	0.999971	0.628793	3.14517	0.00339593	0.07477	0.613906	2.8632	0.00706665	0.0611909
CD19	0.289079	1.11385	0.273	0.542355	0.490411	1.84573	0.0734771	0.789875	0.776285	2.74788	0.00944947	0.0836028	0.0667121	0.240891	0.811057	0.999971	0.627098	2.39469	0.0221719	0.125369	0.878063	3.12646	0.00356839	0.0419341
CD1B	0.478309	0.95232	0.347521	0.599501	1.78265	3.46687	0.00142244	0.456659	1.84533	3.37532	0.00182827	0.0472257	1.13366	2.11526	0.0416609	0.999971	1.99172	3.93012	0.000385868	0.0593092	2.14537	3.94725	0.000367344	0.0128933
CD1C	0.0315878	0.105201	0.916822	0.95929	0.613495	1.99578	0.0538545	0.768008	0.640183	1.95873	0.05822	0.183208	0.571384	1.78335	0.0832779	0.999971	0.776564	2.5632	0.0148678	0.107662	1.27754	3.93183	0.000383975	0.0132057
CD1E	0.0246922	0.0695906	0.944919	0.973483	1.17617	3.23787	0.00265191	0.494801	0.929518	2.40666	0.0215608	0.116771	1.09264	2.88586	0.00667007	0.999971	1.60824	4.49204	7.47272e-05	0.0533688	1.79027	4.66258	4.50028e-05	0.00552344
CD226	0.507943	2.01556	0.0516426	0.358865	0.484874	1.87935	0.0686151	0.785976	0.636825	2.3215	0.0262588	0.126668	0.412131	1.53258	0.134448	0.999971	0.787691	3.0977	0.0038498	0.0766054	0.848588	3.11168	0.00371051	0.042964
CD274	0.0650614	0.129058	0.898057	0.950505	0.721162	1.39732	0.171189	0.861471	2.27402	4.14405	0.000207842	0.0316065	0.703401	1.30759	0.199608	0.999971	1.58257	3.11121	0.0037151	0.0759735	2.39151	4.38382	0.000102908	0.00732027
CD300E	-0.00152287	-0.00332836	0.997363	0.99869	1.11483	2.37997	0.0229439	0.686762	1.15681	2.32272	0.0261853	0.126476	1.42412	2.91688	0.00616109	0.999971	1.65767	3.5906	0.00100937	0.0639691	2.17775	4.39836	9.85883e-05	0.00715167
CD34	-0.3861	-1.84671	0.0733313	0.377264	-0.276311	-1.29091	0.205268	0.872512	-0.612349	-2.69071	0.0108908	0.0884981	-0.41554	-1.8626	0.0710024	0.999971	-0.679061	-3.21893	0.00279003	0.0723179	-0.715029	-3.16039	0.00326144	0.0398082
CD38	0.150633	0.417952	0.678557	0.826124	0.620419	1.68147	0.101651	0.81513	1.51708	3.86708	0.000462236	0.0342785	0.575853	1.49735	0.143342	0.999971	1.03637	2.84986	0.0073103	0.0888219	1.64511	4.21811	0.000167442	0.00880174
CD40	0.0363423	0.0747401	0.940851	0.971768	0.751096	1.50881	0.140399	0.843194	2.04127	3.85664	0.000476226	0.0345117	0.63809	1.22979	0.22705	0.999971	1.69879	3.46245	0.00143988	0.0666694	2.54635	4.83922	2.65326e-05	0.00466394
CD44	0.45643	1.4742	0.149442	0.442217	0.695803	2.19517	0.0349333	0.728972	1.35243	4.01296	0.000303977	0.031689	0.39911	1.20804	0.2352	0.999971	1.26893	4.06184	0.000263899	0.0593092	1.41074	4.21063	0.000171141	0.00886754
CD58	0.335873	1.05863	0.297082	0.562021	0.514395	1.58367	0.122341	0.830397	1.07861	3.1232	0.00359932	0.0587934	0.48158	1.42247	0.163816	0.999971	1.04271	3.25715	0.00251809	0.0713064	1.32804	3.8681	0.000460885	0.0143787
CD72	0.114986	0.421889	0.675709	0.824339	0.428863	1.53698	0.133366	0.839979	0.842263	2.83901	0.0075143	0.0762587	0.193771	0.666267	0.509646	0.999971	0.647744	2.35536	0.0242897	0.130262	0.8139	2.75956	0.00917781	0.0702941
CD79B	0.347604	1.23726	0.224297	0.50399	0.511884	1.7797	0.0838846	0.803176	1.08822	3.55844	0.00110395	0.0403063	0.339775	1.13338	0.264826	0.999971	0.887658	3.1313	0.00352295	0.0754272	1.40336	4.61598	5.17077e-05	0.00573687
CD80	0.0334462	0.0851751	0.932612	0.96738	1.12013	2.78633	0.00858227	0.60043	1.38925	3.25023	0.00256538	0.052679	0.47496	1.13352	0.264767	0.999971	0.813692	2.05366	0.0476047	0.173783	1.31658	3.09835	0.00384324	0.0437537
CD82	0.434196	1.49573	0.143763	0.437634	0.76923	2.58835	0.0139908	0.634963	1.2227	3.86951	0.000459032	0.0341001	0.529878	1.71061	0.0960809	0.999971	1.10025	3.75633	0.000633428	0.060598	1.34355	4.277	0.000140909	0.00826513
CD83	0.413024	0.821301	0.417082	0.651815	1.14316	2.22041	0.0330188	0.727192	2.42794	4.43538	8.83737e-05	0.0312363	0.979051	1.82448	0.0766997	0.999971	1.96683	3.87612	0.000450435	0.0593092	2.98075	5.47735	3.87295e-06	0.00336015
CDC123	0.196739	0.934417	0.356546	0.606065	0.200124	0.928424	0.359601	0.914408	0.633948	2.76612	0.00902853	0.0818971	0.0934332	0.41587	0.680066	0.999971	0.456359	2.14813	0.0387665	0.158963	0.874659	3.83889	0.000500962	0.0149015
CDC37	0.397813	1.7769	0.0843515	0.387766	0.279818	1.22084	0.230378	0.88129	0.832749	3.41716	0.00163063	0.0457502	0.24273	1.01605	0.316638	0.999971	0.721974	3.19602	0.00296624	0.0727184	0.940937	3.88385	0.000440591	0.0141078
CDC42SE2	0.355088	1.38919	0.173626	0.461229	0.295849	1.13056	0.265995	0.889887	0.843809	3.03275	0.00456474	0.0637199	0.221416	0.811783	0.42245	0.999971	0.740991	2.87303	0.00689195	0.0876037	0.897115	3.24332	0.0026134	0.035452
CDC73	0.449065	2.10907	0.0422276	0.346344	0.301618	1.38368	0.175292	0.863307	0.659722	2.84649	0.00737315	0.0756169	0.0927925	0.408414	0.685479	0.999971	0.524485	2.44128	0.01988	0.120338	0.653662	2.83695	0.00755357	0.0633611
CDK1	0.0985857	0.362487	0.719186	0.850369	0.287676	1.03319	0.308661	0.906095	0.704111	2.37841	0.0230272	0.119843	-0.104227	-0.359143	0.721664	0.999971	0.157701	0.574665	0.569225	0.711385	0.358531	1.21821	0.231361	0.428244
CDK14	0.408845	1.18122	0.245547	0.520466	1.02101	2.88139	0.00674671	0.572934	1.67047	4.43383	8.87801e-05	0.0312363	0.608019	1.64625	0.108741	0.999971	1.22422	3.50538	0.00127901	0.0666694	1.55585	4.15391	0.000201955	0.00970762
CDK15	-0.625769	-2.59333	0.0138229	0.312416	-0.260107	-1.05291	0.299658	0.904043	-0.417723	-1.59037	0.120822	0.271244	-0.203977	-0.792191	0.433632	0.999971	-0.45197	-1.85633	0.0719135	0.212376	-0.368035	-1.40945	0.167602	0.355238
CDK16	0.287009	1.86332	0.0708979	0.375081	0.180731	1.1461	0.259595	0.888798	0.354042	2.11161	0.0419943	0.156386	0.0252075	0.153366	0.878998	0.999971	0.308834	1.9871	0.0548508	0.186155	0.370055	2.22012	0.0330409	0.144576
CDK2	0.358082	1.85298	0.0724043	0.376151	0.28412	1.43611	0.159924	0.855818	0.415766	1.97654	0.0560842	0.179478	0.0469603	0.227733	0.82119	0.999971	0.459865	2.35843	0.0241184	0.12992	0.391298	1.87117	0.0697721	0.218723
CDK7	0.24934	1.22665	0.22821	0.507055	0.297776	1.43094	0.161393	0.856068	0.478279	2.16162	0.0376304	0.14926	0.172614	0.795815	0.43155	0.999971	0.496715	2.42182	0.0208098	0.122622	0.690851	3.14074	0.00343597	0.0410424
CDV3P1	-0.952493	-2.13637	0.0397811	0.344544	-0.387509	-0.848975	0.401714	0.919139	-1.38382	-2.85141	0.00728165	0.0752931	-0.360144	-0.757002	0.454158	0.999971	-0.0389702	-0.0866261	0.931467	0.961587	-0.0663373	-0.137496	0.891434	0.93977
CDYL2	0.352338	2.36363	0.0238299	0.323039	0.155961	1.02196	0.313872	0.907681	0.0984019	0.606445	0.548167	0.685012	-0.204582	-1.28616	0.206903	0.999971	0.0673981	0.448096	0.656869	0.778543	-0.0938607	-0.581864	0.56442	0.722274
CEBPD	-0.0333563	-0.124636	0.901531	0.952554	-1.05586	-3.85364	0.000480312	0.424192	-0.91638	-3.14564	0.00339165	0.0575059	-0.778086	-2.72459	0.0100139	0.999971	-0.64021	-2.37078	0.0234383	0.128443	-0.638421	-2.2044	0.034222	0.147536
CECR2	-0.41624	-1.76363	0.0865976	0.390068	-0.272883	-1.12938	0.266486	0.890184	-0.549906	-2.14052	0.0394197	0.15182	-0.158633	-0.629888	0.532894	0.999971	-0.380234	-1.59668	0.119405	0.278846	-0.339854	-1.33068	0.191973	0.383273
CELF5	-0.466265	-1.6086	0.116765	0.415522	-0.525706	-1.77157	0.0852486	0.806838	-0.637867	-2.02168	0.0509739	0.171514	0.0443323	0.143332	0.886857	0.999971	-0.247017	-0.844591	0.404125	0.573585	-0.351957	-1.12208	0.269534	0.467083
CENPN	0.324954	1.25065	0.219431	0.50019	0.621292	2.33564	0.0254194	0.703023	0.978075	3.45821	0.00145679	0.0441476	0.208613	0.752418	0.456874	0.999971	0.465681	1.77625	0.0844611	0.230764	0.674263	2.39805	0.0219985	0.115734
CENPT	0.336054	2.37068	0.0234441	0.321602	0.153145	1.05527	0.298594	0.904043	0.18177	1.17802	0.246804	0.413632	0.00488957	0.0323251	0.974398	0.999971	0.170357	1.19104	0.24172	0.418044	0.105766	0.689485	0.495103	0.667561
CEP135	0.407272	2.04064	0.048952	0.355819	0.368167	1.80188	0.0802571	0.797764	0.671767	3.09221	0.0039059	0.060253	0.313744	1.47321	0.149708	0.999971	0.548102	2.72174	0.0100849	0.0958126	0.665101	3.07955	0.00403812	0.0449348
CEP170	0.50734	2.22997	0.0323189	0.335936	0.420448	1.80514	0.0797354	0.797694	0.77269	3.12013	0.00362858	0.0590656	0.30526	1.25741	0.217002	0.999971	0.795127	3.46369	0.00143495	0.0666694	0.837177	3.40044	0.00170705	0.0282015
CEP19	0.154626	0.639955	0.526405	0.727517	0.33852	1.36851	0.179947	0.864435	0.608664	2.31425	0.0266982	0.127594	0.289681	1.12355	0.268918	0.999971	0.490573	2.01221	0.0520117	0.181345	0.650286	2.48707	0.0178402	0.102412
CEP85	0.246211	1.52579	0.136125	0.432438	0.170496	1.03205	0.309189	0.906095	0.409672	2.33234	0.0256132	0.125453	0.156194	0.907106	0.370607	0.999971	0.489132	3.00412	0.00491821	0.0809016	0.70059	4.01208	0.000304757	0.0116439
CERS5	0.371801	2.22362	0.0327824	0.336288	0.370925	2.16688	0.0371955	0.735106	0.590225	3.24291	0.00261628	0.052914	0.105879	0.593428	0.556743	0.999971	0.426079	2.52548	0.0162785	0.111455	0.488109	2.69765	0.0107055	0.0773489
CETP	0.174432	0.77659	0.442662	0.669263	0.53143	2.31105	0.0268943	0.706108	0.699857	2.86247	0.00707972	0.0744669	0.384147	1.60276	0.118052	0.999971	0.590292	2.60456	0.0134508	0.104465	0.836651	3.44213	0.00152267	0.0266948
CFAP65	-0.6482	-2.51489	0.0166959	0.31562	-0.476029	-1.80402	0.079914	0.79771	-0.721483	-2.5716	0.0145693	0.098563	-0.321989	-1.17073	0.249683	0.999971	-0.691616	-2.65937	0.0117647	0.0998667	-0.640355	-2.29588	0.0278426	0.131269
CFB	0.319011	1.56221	0.127312	0.425268	0.55186	2.63975	0.0123445	0.619828	0.235181	1.05805	0.297344	0.465257	0.351065	1.61112	0.116213	0.999971	0.239094	1.1604	0.253809	0.430118	0.182578	0.826229	0.414319	0.602365
CFLAR	0.395231	1.70176	0.0977453	0.398853	0.426448	1.79354	0.0816053	0.799758	0.878483	3.47494	0.00139117	0.0436578	0.20721	0.83611	0.408814	0.999971	0.663735	2.83233	0.00764238	0.0896098	0.677992	2.69767	0.010705	0.0773489
CFLAR-AS1	0.364791	1.9948	0.0539662	0.360093	0.339731	1.81463	0.0782334	0.797202	0.57213	2.87419	0.00687159	0.0737688	0.100946	0.517307	0.608224	0.999971	0.439152	2.37998	0.0229437	0.127141	0.374387	1.89188	0.0668762	0.213723
CFTR	-0.36139	-1.60192	0.118239	0.416344	-0.286137	-1.2389	0.223698	0.87978	-0.548962	-2.23549	0.0319205	0.137943	-0.122806	-0.510142	0.613182	0.999971	-0.453123	-1.9906	0.0544471	0.185552	-0.604677	-2.47688	0.0182769	0.10372
CGA	-0.91856	-3.36302	0.00189063	0.253418	-0.563297	-2.01446	0.0517636	0.762423	-0.811318	-2.72885	0.00990828	0.0854669	-0.412019	-1.41366	0.16637	0.999971	-0.517891	-1.87916	0.0686427	0.207772	-0.854292	-2.89031	0.00659467	0.0589806
CH17-472G23.4	0.536987	2.26931	0.0295751	0.332702	0.568933	2.34849	0.024678	0.698093	0.418158	1.62345	0.113545	0.262237	0.16169	0.640353	0.526149	0.999971	0.513346	2.15002	0.038605	0.15855	0.415324	1.62194	0.113868	0.286456
CHAF1A	0.140945	0.83539	0.409213	0.646259	0.0207829	0.120322	0.904922	0.989996	0.257406	1.4016	0.169916	0.331387	0.0230358	0.127952	0.898925	0.999971	0.320547	1.88293	0.0681144	0.20692	0.530654	2.90648	0.00632748	0.0575918
CHD3	0.40735	2.04916	0.0480665	0.353876	0.338961	1.66554	0.104808	0.815611	0.839	3.87737	0.000448831	0.0339501	0.258599	1.2191	0.231027	0.999971	0.758146	3.77976	0.000592725	0.060598	0.984086	4.57466	5.84742e-05	0.00589086
CHI3L1	1.24979	1.73239	0.092085	0.394928	1.96655	2.66265	0.0116704	0.614085	3.60451	4.59011	5.58479e-05	0.0312363	0.995481	1.29315	0.204502	0.999971	2.2863	3.14084	0.00343506	0.0748921	3.11381	3.98858	0.00032613	0.0119269
CHKB	0.578044	2.73597	0.00973434	0.300887	0.465129	2.15041	0.0385718	0.735106	0.330941	1.43902	0.159103	0.318497	0.218415	0.968812	0.339343	0.999971	0.597984	2.80507	0.00818718	0.0908269	0.380051	1.6623	0.105461	0.274949
CHMP4B	0.691133	3.12596	0.00357309	0.284505	0.461245	2.03775	0.0492553	0.757725	0.998616	4.14943	0.000204612	0.0316065	0.319199	1.35297	0.184813	0.999971	0.886161	3.97226	0.000341837	0.0593092	1.01836	4.25637	0.000149697	0.00836328
CHMP5	0.282066	0.970108	0.338706	0.592725	0.460735	1.54782	0.130739	0.837636	1.16837	3.69163	0.000760419	0.0370791	0.325796	1.05008	0.30094	0.999971	0.778997	2.65527	0.0118837	0.10009	1.20881	3.84188	0.00049671	0.0148267
CHORDC1	0.411057	1.66375	0.10517	0.40536	0.280235	1.10791	0.275519	0.894625	0.501772	1.86577	0.0705448	0.202318	0.232406	0.881532	0.384095	0.999971	0.632329	2.53648	0.0158551	0.110247	0.586177	2.19246	0.0351449	0.149917
CHPF2	0.388048	2.02463	0.0506548	0.357851	0.223553	1.13931	0.26238	0.888798	0.5726	2.7446	0.00952713	0.0839421	0.210565	1.02956	0.310338	0.999971	0.621271	3.21251	0.00283834	0.0724145	0.711779	3.43181	0.00156644	0.0271165
CHRNB4	-0.260812	-1.02065	0.314485	0.575258	-0.141566	-0.541135	0.591872	0.944589	-0.427231	-1.53595	0.133618	0.287589	-0.179641	-0.65881	0.514366	0.999971	-0.57691	-2.23748	0.0317783	0.14566	-0.361417	-1.30699	0.199809	0.392289
CHST11	0.38988	1.46414	0.152156	0.444462	0.426687	1.56516	0.126619	0.833449	0.900528	3.10682	0.00375837	0.0594826	0.401929	1.41451	0.166121	0.999971	1.00876	3.75443	0.000636838	0.060598	1.04634	3.63112	0.000901256	0.0200923
CHST2	0.173687	0.64653	0.52219	0.724858	0.473814	1.72277	0.0938324	0.811733	1.11285	3.80561	0.000550754	0.0348009	0.371383	1.29553	0.203688	0.999971	0.991373	3.6573	0.000837476	0.0618203	1.30993	4.50595	7.171e-05	0.00644432
CHSY1	0.492442	1.80176	0.0802766	0.383654	0.500303	1.78802	0.0825074	0.799758	1.06004	3.56313	0.00108964	0.0401541	0.207812	0.712557	0.480884	0.999971	0.599469	2.17376	0.0366339	0.15525	0.918253	3.10471	0.00377934	0.0433381
CICP13	-0.613441	-1.62465	0.113287	0.412289	-0.408311	-1.05628	0.298141	0.904043	-0.643841	-1.56651	0.126304	0.27825	0.393235	0.975989	0.335825	0.999971	0.249562	0.655042	0.51676	0.668405	-0.237173	-0.580457	0.565357	0.722956
CIR1	0.491333	2.17496	0.0365369	0.342292	0.451699	1.95309	0.0589102	0.775818	0.932912	3.79387	0.000569441	0.0348534	0.437353	1.81432	0.0782821	0.999971	0.851501	3.73562	0.000671644	0.0608829	0.934835	3.82408	0.000522552	0.0152778
CLASRP	0.295588	2.31526	0.0266369	0.328416	0.0309191	0.236558	0.814391	0.978368	0.157145	1.13078	0.265901	0.433669	0.0945444	0.693991	0.492308	0.999971	0.331995	2.57719	0.0143739	0.106675	0.320321	2.31854	0.0264373	0.127537
CLCA3P	-0.787372	-2.79333	0.00843276	0.300887	-0.340301	-1.17924	0.246323	0.886783	-0.302544	-0.986046	0.330936	0.496765	0.375688	1.24904	0.220011	0.999971	-0.246237	-0.86576	0.392568	0.563478	-0.0967121	-0.317059	0.753099	0.853049
CLCF1	0.377666	1.34354	0.187819	0.472632	0.854241	2.96839	0.00539555	0.551366	0.672198	2.19688	0.0348005	0.143762	0.279615	0.932198	0.357675	0.999971	0.549215	1.93636	0.061001	0.19562	0.537093	1.76567	0.0862502	0.246106
CLDN12	0.6007	2.49402	0.0175477	0.31562	0.644835	2.61511	0.01311	0.627039	0.728051	2.77697	0.00878628	0.0808675	0.246527	0.959209	0.344089	0.999971	0.518747	2.13453	0.039942	0.161013	0.375431	1.44042	0.15871	0.344205
CLDND1	0.464392	1.87257	0.0695737	0.374195	0.336105	1.32381	0.194221	0.869623	0.674569	2.49888	0.0173458	0.105989	0.246129	0.930082	0.358754	0.999971	0.654945	2.61734	0.0130388	0.103426	0.796225	2.96692	0.00541611	0.0528557
CLEC19A	-0.370188	-1.08752	0.284301	0.551195	-0.282885	-0.811755	0.422466	0.921976	-0.559316	-1.50953	0.140216	0.295301	-0.247747	-0.682074	0.49972	0.999971	-0.356694	-1.03852	0.30621	0.483604	-0.945196	-2.56599	0.014768	0.092439
CLEC2A	-1.53841	-4.24404	0.000155205	0.179177	-1.09959	-2.96302	0.00547095	0.552625	-1.46395	-3.71023	0.000721586	0.0365305	0.244191	0.631311	0.531974	0.999971	-0.0566435	-0.154867	0.877823	0.928491	-0.634672	-1.61798	0.114722	0.287702
CLEC2D	0.531273	1.98442	0.0551613	0.361271	0.407369	1.48629	0.146233	0.846682	0.882284	3.02755	0.00462704	0.0641164	0.221535	0.775468	0.443316	0.999971	0.754772	2.79406	0.00841727	0.0914459	0.785338	2.71075	0.0103637	0.075802
CLEC4C	0.115939	0.419733	0.677268	0.82537	0.624123	2.20706	0.0340195	0.728972	0.658114	2.18884	0.0354287	0.144998	0.359822	1.22079	0.230397	0.999971	0.425995	1.52846	0.135464	0.298527	0.466902	1.56203	0.127356	0.304405
CLEC4E	-0.0972367	-0.176283	0.861096	0.930877	1.04926	1.85807	0.0716594	0.789875	2.07377	3.45388	0.00147424	0.044191	0.754158	1.2813	0.208586	0.999971	1.55429	2.79264	0.00844735	0.0914459	2.00259	3.35498	0.00193247	0.0303622
CLEC5A	0.569793	0.920167	0.363838	0.610902	1.88788	2.97799	0.00526315	0.545668	2.69049	3.99161	0.000323296	0.0317731	1.53008	2.31564	0.0266136	0.999971	2.1684	3.4705	0.00140829	0.0666694	3.24846	4.8478	2.58586e-05	0.00466394
CLEC6A	0.505105	0.833981	0.409996	0.646595	1.75509	2.83057	0.00767659	0.590192	2.49411	3.78319	0.000586978	0.0350387	1.26806	1.9621	0.0578108	0.999971	1.98006	3.24008	0.00263628	0.071319	2.73816	4.17783	0.000188349	0.00937602
CLEC7A	0.126078	0.292616	0.771558	0.881684	0.67112	1.52145	0.137207	0.842061	1.79135	3.81951	0.000529406	0.0345569	0.718878	1.56359	0.12699	0.999971	1.53126	3.52218	0.00122086	0.0665296	2.35742	5.05608	1.38252e-05	0.00412098
CLIC4	0.140959	0.368248	0.714925	0.847946	0.453411	1.15701	0.255169	0.888798	1.57361	3.77671	0.000597871	0.0351718	0.699058	1.71147	0.0959209	0.999971	1.45132	3.75762	0.000631106	0.060598	2.13772	5.16079	1.00822e-05	0.00404174
CLINT1	0.308447	1.36883	0.179847	0.465672	0.227372	0.98561	0.331147	0.90931	0.69722	2.84254	0.00744724	0.0760298	0.203463	0.846178	0.403251	0.999971	0.64301	2.82808	0.00772513	0.0898957	0.789738	3.2387	0.00264605	0.03561
CLIP1	0.462647	2.33937	0.0252021	0.323675	0.282413	1.39487	0.171921	0.862032	0.722691	3.35714	0.00192111	0.0475711	0.155035	0.73466	0.467482	0.999971	0.594241	2.97794	0.00526389	0.0824359	0.652448	3.04869	0.00437845	0.0470267
CLNS1AP1	-0.279075	-0.516011	0.609119	0.783455	0.00317875	0.00574108	0.995452	0.999757	-0.334694	-0.568531	0.573336	0.70609	0.348669	0.604168	0.549661	0.999971	-0.649608	-1.1904	0.24197	0.418266	-0.494498	-0.84493	0.403938	0.593826
CLUHP3	0.429297	2.58746	0.0140209	0.313296	0.311237	1.83234	0.0754945	0.790771	0.446702	2.47343	0.0184266	0.109157	0.0677874	0.382887	0.704139	0.999971	0.534871	3.19498	0.00297447	0.0727272	0.399561	2.22544	0.0326491	0.143634
CMAS	0.393023	1.61021	0.116413	0.415182	0.484862	1.94036	0.0604965	0.778214	0.770161	2.89877	0.00645368	0.0722678	0.410882	1.57757	0.123738	0.999971	0.730016	2.96415	0.00545505	0.0829848	1.04861	3.97003	0.000344038	0.0123909
CMB9-55A18.1	0.607409	2.55151	0.0152924	0.314443	0.275691	1.1312	0.26573	0.889772	0.106973	0.412818	0.682279	0.790412	0.241806	0.951897	0.347733	0.999971	0.0409756	0.170587	0.865539	0.921064	-0.052697	-0.20456	0.839111	0.907478
CMC1	0.302073	1.62207	0.113841	0.412936	0.21932	1.15036	0.257861	0.888798	0.447007	2.20515	0.0341648	0.142417	0.229457	1.15469	0.256108	0.999971	0.519174	2.76295	0.00910037	0.092916	0.554142	2.74976	0.00940523	0.0714547
CMC2	0.29911	1.54468	0.131496	0.428099	0.423234	2.13494	0.039906	0.735106	0.697496	3.30914	0.00218848	0.0497706	0.25154	1.21736	0.23168	0.999971	0.499159	2.55475	0.0151739	0.108551	0.573346	2.73615	0.00972987	0.0729399
CMTM2	-0.804402	-2.33628	0.0253821	0.324804	-0.754436	-2.14029	0.0394398	0.735106	-0.871423	-2.32514	0.0260404	0.126175	-0.272959	-0.742943	0.462516	0.999971	-0.457208	-1.31604	0.196789	0.369902	-0.507132	-1.3611	0.182256	0.372463
CMTM6	0.449419	1.36296	0.181675	0.467312	0.528003	1.5641	0.126868	0.833591	1.27218	3.54443	0.00114778	0.0406479	0.450028	1.27902	0.209378	0.999971	1.0222	3.07234	0.00411533	0.077884	1.45757	4.08487	0.000246853	0.0105655
CMTR1	0.428901	1.92263	0.0627659	0.368356	0.466039	2.04061	0.0489559	0.757725	0.907166	3.73587	0.000671179	0.0360621	0.224234	0.941988	0.352711	0.999971	0.685922	3.0473	0.00439438	0.0790873	0.782869	3.24298	0.00261582	0.0354601
CNGA3	-0.616123	-2.01719	0.0514631	0.358853	-0.351417	-1.12383	0.268799	0.892096	-0.741809	-2.23121	0.0322293	0.138568	-0.15992	-0.49067	0.626748	0.999971	-0.516756	-1.67675	0.102578	0.25648	-0.538696	-1.62983	0.112184	0.28411
CNNM1	-0.6207	-2.78267	0.00866156	0.300887	-0.4432	-1.94079	0.0604418	0.778214	-0.704755	-2.90259	0.00639091	0.0719525	-0.503091	-2.11365	0.041808	0.999971	-0.56683	-2.51847	0.0165539	0.112007	-0.682784	-2.82866	0.00771376	0.0639917
CNOT9	0.25984	1.26555	0.214105	0.495952	0.207459	0.986971	0.330489	0.909048	0.711747	3.18469	0.00305727	0.055363	0.106434	0.485804	0.63016	0.999971	0.635302	3.0666	0.00417776	0.0779114	0.856265	3.85389	0.000479974	0.014634
CNR2	0.180674	0.927172	0.360241	0.608643	0.151147	0.757639	0.453782	0.923659	0.417389	1.96776	0.0571284	0.181063	-0.03661	-0.176064	0.861267	0.999971	0.348269	1.77126	0.0853005	0.232033	0.522794	2.4792	0.0181764	0.103424
CNRIP1	-0.184764	-0.610899	0.545247	0.740619	-0.538053	-1.7377	0.0911314	0.809462	-0.547799	-1.66395	0.105128	0.251009	-0.468184	-1.45069	0.155845	0.999971	-0.663385	-2.17381	0.0366299	0.15525	-0.586507	-1.79202	0.081853	0.239099
CNTN3	-0.487256	-1.93228	0.0615207	0.367147	-0.193002	-0.747609	0.459733	0.924313	-0.467698	-1.70391	0.0973387	0.240361	-0.0795438	-0.295615	0.769286	0.999971	-0.681854	-2.67983	0.011187	0.0985869	-0.534964	-1.96045	0.0580109	0.196936
COL4A4	-0.288904	-1.9345	0.0612385	0.366891	-0.171826	-1.12383	0.268798	0.892096	-0.354835	-2.18277	0.0359096	0.145807	-0.35493	-2.22722	0.0325189	0.999971	-0.371954	-2.46835	0.0186497	0.11733	-0.367398	-2.27336	0.0293048	0.135086
COL8A2	0.433992	1.27938	0.209253	0.491345	0.877465	2.52665	0.0162329	0.644156	1.5156	4.10458	0.000233122	0.0316065	0.673294	1.86006	0.0713697	0.999971	1.33297	3.89439	0.000427493	0.0593092	1.72406	4.69664	4.06523e-05	0.00524612
COMMD1	0.138395	0.669455	0.507635	0.715632	0.259584	1.22653	0.228259	0.880383	0.654443	2.9083	0.00629813	0.0716635	0.121702	0.551701	0.584689	0.999971	0.483145	2.31622	0.0265779	0.13548	0.860076	3.84462	0.000492838	0.0147834
COPS5	0.390919	2.07038	0.045922	0.351339	0.259403	1.34196	0.188326	0.866706	0.540348	2.62908	0.0126706	0.0937999	0.131648	0.653408	0.5178	0.999971	0.451396	2.36933	0.0235176	0.128591	0.531571	2.60161	0.0135477	0.0883629
COPS6	0.236121	1.33394	0.190913	0.47589	0.29885	1.64912	0.108148	0.820068	0.579646	3.00836	0.00486422	0.0652971	0.19136	1.01311	0.318018	0.999971	0.603857	3.38094	0.00180046	0.0669683	0.744051	3.88437	0.000439935	0.0141078
COPS7B	0.258365	1.93503	0.0611711	0.366891	0.209636	1.53362	0.134192	0.840578	0.294876	2.0289	0.0501961	0.169996	0.128805	0.904049	0.372203	0.999971	0.355853	2.64135	0.0122961	0.101259	0.353979	2.4499	0.0194805	0.107619
COQ10B	0.343081	1.47301	0.14976	0.44242	0.301319	1.26368	0.21477	0.875583	0.745075	2.93885	0.00582279	0.0696111	0.243896	0.981344	0.333216	0.999971	0.652196	2.77518	0.00882576	0.0922546	0.778831	3.09009	0.00392774	0.0442314
COQ6	0.240542	1.55893	0.128089	0.425519	-0.051645	-0.326935	0.745681	0.967679	-0.0464909	-0.276803	0.783574	0.862749	-0.0114084	-0.069289	0.945157	0.999971	0.216237	1.38889	0.173716	0.344265	0.197092	1.18038	0.245879	0.443096
COX20	0.533753	2.31638	0.0265686	0.328379	0.168181	0.712927	0.480658	0.928541	0.346637	1.38201	0.1758	0.33771	0.0559361	0.227493	0.821376	0.999971	0.241929	1.04054	0.305284	0.482551	0.221231	0.88722	0.381068	0.573934
CPEB2-AS1	-0.294258	-1.5063	0.141039	0.435801	-0.232564	-1.16286	0.252822	0.888798	-0.227638	-1.07052	0.291773	0.459655	-0.177971	-0.853769	0.399088	0.999971	-0.34567	-1.75367	0.088316	0.236323	-0.341786	-1.6168	0.114977	0.287983
CPEB4	0.545351	2.50292	0.0171798	0.31562	0.315607	1.41487	0.166019	0.857085	0.598864	2.52503	0.0162961	0.103354	0.221184	0.951331	0.348016	0.999971	0.68121	3.09852	0.00384148	0.0766054	0.642441	2.72472	0.0100106	0.0741596
CREB3	0.233569	1.04576	0.302901	0.566788	0.36852	1.61167	0.116092	0.826609	0.951351	3.91315	0.000405126	0.0330768	0.386301	1.62088	0.114096	0.999971	0.800196	3.55073	0.00112787	0.065458	1.05077	4.34754	0.000114522	0.00760776
CREM	0.39602	1.86955	0.0700031	0.374663	0.34712	1.60066	0.118518	0.826773	0.83243	3.61024	0.000955496	0.0389546	0.248919	1.10125	0.278369	0.999971	0.508308	2.37821	0.0230377	0.127468	0.577958	2.52136	0.0164398	0.0981039
CRIM1	0.0856909	0.213676	0.83205	0.915087	1.06513	2.59432	0.0137897	0.634963	1.39999	3.2071	0.00287972	0.0544107	0.93769	2.19122	0.0352415	0.999971	1.69511	4.18911	0.000182247	0.0593092	2.09484	4.82712	2.75128e-05	0.00470084
CRNDE	-0.387334	-1.61819	0.114677	0.413939	-0.179221	-0.73136	0.469469	0.926568	-0.369906	-1.41972	0.164612	0.32518	-0.0797927	-0.312401	0.756605	0.999971	-0.396263	-1.6407	0.109894	0.265775	-0.581078	-2.24334	0.0313622	0.140291
CRTAM	0.410699	1.56325	0.127068	0.425195	0.246898	0.917954	0.364979	0.915839	0.849677	2.97116	0.00535707	0.0674013	0.433248	1.54542	0.131315	0.999971	0.770094	2.90503	0.00635103	0.0860822	0.973641	3.42468	0.00159737	0.0273746
CSAG1	-0.059325	-0.11423	0.909714	0.956084	-0.2604	-0.489758	0.627387	0.949067	-1.1459	-2.02701	0.0503988	0.170423	0.22857	0.412447	0.682549	0.999971	-0.0770795	-0.14709	0.883912	0.932322	-0.578341	-1.02907	0.310568	0.507651
CSF1	0.949602	1.3317	0.191641	0.476369	2.00571	2.74746	0.00945953	0.603918	3.04381	3.92148	0.00039556	0.0329885	1.32814	1.74548	0.0897508	0.999971	2.43596	3.38561	0.00177762	0.0669683	3.16022	4.09542	0.00023941	0.0104611
CSF2	0.707223	1.1373	0.263207	0.53557	2.29259	3.60116	0.000980027	0.451754	2.30392	3.40371	0.00169184	0.0462111	1.22321	1.84343	0.073821	0.999971	1.92978	3.07559	0.00408041	0.0777061	1.88675	2.8038	0.00821328	0.0661389
CSK	0.347741	1.67484	0.102956	0.403223	0.350032	1.64674	0.10864	0.821194	0.862845	3.81784	0.000531928	0.0345569	0.144355	0.65156	0.518977	0.999971	0.709832	3.38825	0.00176487	0.0669683	0.998278	4.4431	8.63801e-05	0.00680276
CSMD1	-0.511645	-1.99079	0.0544248	0.360153	-0.215803	-0.820189	0.417707	0.921976	-0.652977	-2.33412	0.0255088	0.125365	0.0846543	0.308683	0.759408	0.999971	-0.398796	-1.53784	0.133157	0.295768	-0.343878	-1.23646	0.224593	0.421025
CSMD2-AS1	-0.505233	-1.89475	0.0664821	0.372455	-0.323958	-1.18672	0.2434	0.88601	-0.863044	-2.97345	0.00532536	0.0673203	-0.0399665	-0.140463	0.889106	0.999971	-0.427303	-1.58818	0.121317	0.281437	-0.617112	-2.13866	0.0395811	0.159629
CSNK1G2	0.339636	1.87934	0.0686165	0.373588	0.202679	1.09547	0.280855	0.896948	0.579839	2.94759	0.00569315	0.0692501	0.139991	0.725936	0.472746	0.999971	0.53316	2.92384	0.00605197	0.0848087	0.590827	3.02114	0.00470509	0.0488817
CSRNP1	0.755132	2.62467	0.012808	0.308921	0.799655	2.71489	0.0102578	0.609088	0.889157	2.83921	0.00751052	0.0762567	0.50568	1.64715	0.108554	0.999971	0.948382	3.26691	0.00245275	0.0710007	0.817553	2.62594	0.0127683	0.0854401
CSRNP2	0.425045	2.3914	0.0223419	0.321423	0.338148	1.85833	0.0716214	0.789875	0.577445	2.98467	0.00517293	0.06666	0.195886	1.03282	0.308831	0.999971	0.493719	2.75296	0.0093304	0.0933854	0.466619	2.42604	0.0206049	0.111297
CSTL1	-0.35984	-1.52824	0.135519	0.431927	-0.292923	-1.21516	0.232509	0.881469	-0.507723	-1.98096	0.0555652	0.178632	-0.44411	-1.76758	0.0859244	0.999971	-0.830488	-3.49557	0.00131416	0.0666694	-0.879627	-3.45221	0.00148104	0.0263595
CTA-212A2.1	0.309021	1.2234	0.229422	0.507552	0.674803	2.60948	0.0132907	0.627519	1.07353	3.90445	0.000415347	0.0332748	0.32108	1.19124	0.241645	0.999971	0.712899	2.79711	0.00835278	0.0914375	1.05217	3.84929	0.000486318	0.0146557
CTA-212A2.2	-0.345169	-1.27449	0.210959	0.492579	-0.147642	-0.53249	0.59778	0.945805	-0.444265	-1.507	0.140861	0.296095	-0.0177686	-0.0614841	0.951326	0.999971	-0.191437	-0.70054	0.488261	0.643925	0.00873901	0.0298183	0.976383	0.987807
CTA-254O6.1	-1.50716	-3.095	0.00387729	0.286603	-0.991743	-1.9893	0.0545965	0.768726	-1.14527	-2.16062	0.0377134	0.149354	-0.153535	-0.295473	0.769394	0.999971	-1.42846	-2.90718	0.00631619	0.0860822	-0.626902	-1.18965	0.24226	0.439542
CTA-280A3.2	-0.507206	-1.9808	0.055584	0.361271	-0.281958	-1.07557	0.289541	0.90099	-0.597625	-2.14413	0.0391086	0.151329	-0.147519	-0.539897	0.592716	0.999971	-0.60785	-2.35264	0.0244433	0.13079	-0.340623	-1.22927	0.227241	0.423645
CTAGE3P	-0.944228	-2.76129	0.00913824	0.300887	-0.254668	-0.727457	0.471826	0.926976	-0.90215	-2.42371	0.0207175	0.115063	-0.29171	-0.799451	0.429467	0.999971	-0.292238	-0.846982	0.402809	0.572426	-0.579635	-1.56641	0.126326	0.302994
CTB-113P19.1	-0.753416	-2.89175	0.00657057	0.299868	-0.704325	-2.64057	0.0123198	0.619828	-0.804826	-2.83788	0.00753571	0.0763491	0.227047	0.816672	0.419687	0.999971	-0.414548	-1.5769	0.123893	0.284155	-0.246634	-0.874775	0.387711	0.580052
CTB-119C2.1	0.261686	1.21933	0.23094	0.508853	0.175238	0.797573	0.430542	0.922555	0.388768	1.66418	0.105082	0.250969	0.174164	0.760516	0.452083	0.999971	0.294659	1.36071	0.182377	0.353957	-0.00313685	-0.0135069	0.989301	0.994706
CTB-158E9.1	-0.161231	-0.519969	0.606387	0.781891	-0.477043	-1.50274	0.141952	0.843366	-0.776276	-2.29991	0.0275874	0.129693	0.301873	0.912345	0.367882	0.999971	-0.266991	-0.853351	0.399317	0.569395	-0.310753	-0.926106	0.360787	0.554793
CTB-178M22.1	-0.481295	-1.45268	0.155296	0.446477	-0.276506	-0.815194	0.420521	0.921976	-0.463108	-1.28412	0.207606	0.372728	-0.31393	-0.887967	0.380672	0.999971	-0.60412	-1.80711	0.0794224	0.223325	-0.522776	-1.45811	0.153802	0.338366
CTB-193M12.5	0.414543	1.52775	0.13564	0.432098	0.443011	1.59476	0.119834	0.828118	0.85184	2.88408	0.00670049	0.0732032	0.21925	0.757229	0.454024	0.999971	0.7549	2.75724	0.00923125	0.0930088	0.637353	2.1706	0.0368912	0.153752
CTB-31N19.3	0.522785	1.6307	0.111999	0.411211	0.492421	1.50032	0.142575	0.843366	0.736125	2.10944	0.0421929	0.15675	0.120328	0.351741	0.72716	0.999971	0.76441	2.36308	0.02386	0.129302	0.998778	2.87896	0.0067886	0.0599494
CTB-32H22.1	-0.119173	-0.397656	0.693319	0.835712	0.27083	0.882725	0.383459	0.918131	-0.235525	-0.721995	0.475135	0.625802	0.180793	0.565351	0.575472	0.999971	-0.302497	-1.00036	0.324063	0.500516	-0.225645	-0.695784	0.491198	0.66433
CTB-49A3.5	-0.780158	-2.75097	0.00937694	0.300887	-0.612403	-2.10931	0.0422057	0.735687	-1.16273	-3.76661	0.000615245	0.0353241	-0.217871	-0.719963	0.476369	0.999971	-0.56827	-1.98592	0.0549874	0.186178	-0.557514	-1.81667	0.0779134	0.232115
CTB-58E17.3	0.649713	2.04552	0.0484437	0.354612	0.226798	0.697461	0.490161	0.93046	0.609238	1.76212	0.0868567	0.226335	0.427568	1.26151	0.215538	0.999971	0.0821711	0.256391	0.799163	0.878306	0.5002	1.45526	0.154583	0.33933
CTB-61M7.2	-0.175808	-0.348535	0.729544	0.85696	0.638662	1.23673	0.22449	0.880026	1.70935	3.11319	0.00369577	0.0593015	0.856852	1.59191	0.120474	0.999971	1.41941	2.7888	0.00852932	0.0915314	1.77226	3.24676	0.00258935	0.0353143
CTB-76P12.1	-0.858611	-2.71307	0.0103043	0.300887	-0.364574	-1.12525	0.268206	0.892096	-0.8795	-2.5531	0.0152342	0.100337	-0.510641	-1.51212	0.139558	0.999971	-0.251812	-0.788575	0.435715	0.599696	-0.739156	-2.15833	0.0379047	0.155923
CTC-254B4.1	-0.218134	-0.680995	0.500394	0.710267	-0.312492	-0.952926	0.347219	0.912202	-0.3966	-1.13747	0.263134	0.431106	0.127996	0.374477	0.710328	0.999971	-0.189263	-0.585585	0.561943	0.705423	0.012383	0.0357245	0.971707	0.985422
CTC-281M20.4	-0.946987	-2.20506	0.0341715	0.339065	-0.265283	-0.603372	0.550185	0.939527	-0.836921	-1.79031	0.0821321	0.21973	0.350528	0.764903	0.4495	0.999971	0.193439	0.4464	0.658081	0.779477	-0.707274	-1.52189	0.137099	0.31777
CTC-296K1.3	-0.292937	-0.509452	0.61366	0.786097	-0.816264	-1.38662	0.174401	0.863307	-0.965904	-1.54323	0.131846	0.285169	-0.189266	-0.308467	0.759571	0.999971	-0.912754	-1.57321	0.124745	0.28519	-0.42147	-0.67735	0.502675	0.673412
CTC-303L1.2	-0.660163	-2.02576	0.0505326	0.357841	-0.0651618	-0.195312	0.846288	0.982322	-1.07811	-3.03925	0.00448787	0.063174	0.453645	1.30455	0.200633	0.999971	-0.267894	-0.814712	0.420794	0.587607	0.0831197	0.2357	0.815051	0.892643
CTC-347C20.2	-0.359215	-0.901482	0.373547	0.617542	0.333141	0.816637	0.419707	0.921976	-0.139063	-0.320613	0.750427	0.839616	0.234177	0.550748	0.585335	0.999971	0.102762	0.255588	0.799778	0.878711	-0.0423708	-0.0982622	0.922289	0.958385
CTC-378H22.2	0.305971	1.43218	0.161039	0.451481	0.378942	1.73256	0.092054	0.811733	0.0860248	0.36992	0.71369	0.813287	-0.179918	-0.789218	0.435344	0.999971	0.07248	0.336232	0.738721	0.837188	-0.0397513	-0.171944	0.864481	0.922946
CTC-457E21.1	-0.524252	-2.47775	0.0182392	0.31663	-0.379002	-1.74967	0.0890143	0.80729	-0.439488	-1.90823	0.064662	0.193759	-0.207257	-0.917979	0.364967	0.999971	-0.451371	-2.11423	0.0417546	0.164307	-0.145267	-0.634454	0.529946	0.695442
CTC-459F4.7	0.0828753	0.220825	0.826523	0.911871	0.208747	0.543304	0.590394	0.944589	-0.219646	-0.537668	0.594238	0.722809	-0.203351	-0.507781	0.614819	0.999971	-0.607902	-1.60531	0.117488	0.276212	-0.480951	-1.18425	0.244364	0.441419
CTC-479C5.12	0.247689	1.16778	0.250857	0.525006	0.392944	1.8096	0.079027	0.797437	0.53853	2.33255	0.0256009	0.125453	0.180281	0.796543	0.431133	0.999971	0.46041	2.1513	0.0384967	0.158305	0.517745	2.25573	0.030498	0.138048
CTC-487M23.6	0.523882	2.38156	0.0228593	0.321455	0.554243	2.46109	0.0189727	0.657171	0.255971	1.06902	0.292439	0.460257	0.0652625	0.278034	0.782636	0.999971	0.0870303	0.392104	0.697379	0.807935	0.0375379	0.157694	0.875612	0.929929
CTC-490G23.6	-0.653237	-2.12762	0.0405512	0.344937	-0.684403	-2.17738	0.0363416	0.731196	-0.742	-2.22021	0.033034	0.140288	-0.13434	-0.410049	0.684291	0.999971	-0.276898	-0.89381	0.377581	0.55008	-0.383623	-1.15463	0.25613	0.453571
CTC-526N19.1	-0.638968	-1.76801	0.0858508	0.389362	-0.812743	-2.19663	0.0348196	0.728972	-0.985305	-2.50463	0.0171098	0.105446	-0.402194	-1.04291	0.3042	0.999971	-0.698072	-1.9143	0.0638572	0.200267	-0.733271	-1.87494	0.0692371	0.217733
CTC-542B22.1	-1.09574	-2.97318	0.00532916	0.294028	-0.635517	-1.68438	0.101084	0.81513	-0.67092	-1.67244	0.103431	0.248708	0.0589961	0.150018	0.881619	0.999971	0.0849078	0.228331	0.820729	0.892309	-0.420679	-1.05483	0.298793	0.495707
CTC-542B22.2	0.634863	1.97854	0.0558493	0.361339	0.0144555	0.0440044	0.965153	0.995642	0.0593921	0.170043	0.865963	0.917837	-0.00679133	-0.0198347	0.984289	0.999971	-0.0546203	-0.168702	0.86701	0.921963	0.680909	1.96097	0.0579476	0.19679
CTC-543D15.3	-1.77785	-3.91895	0.000398444	0.213585	-1.3032	-2.80598	0.0081683	0.59821	-2.23033	-4.51658	6.94824e-05	0.0312363	-0.621601	-1.28408	0.207621	0.999971	-0.266554	-0.582321	0.564115	0.707047	-0.675578	-1.37616	0.17759	0.366975
CTC-559E9.8	0.169577	0.715235	0.479249	0.695327	0.127782	0.526441	0.601931	0.946318	0.00356558	0.0138159	0.989056	0.994099	0.277494	1.09683	0.280267	0.999971	0.336439	1.40634	0.168516	0.338637	0.243139	0.947661	0.349855	0.544827
CTC-571O20.1	-0.676194	-2.95433	0.00559512	0.297686	-0.150035	-0.640293	0.526188	0.936667	-0.549944	-2.20736	0.0339966	0.142174	0.341944	1.40007	0.17037	0.999971	-0.472849	-2.04745	0.0482436	0.174987	-0.141591	-0.571663	0.571235	0.726978
CTC-591M7.1	-0.464601	-1.76204	0.0868704	0.390186	-0.288413	-1.06844	0.2927	0.902627	-0.276877	-0.964692	0.341374	0.506737	-0.223245	-0.793457	0.432904	0.999971	-0.378202	-1.42155	0.164082	0.333322	-0.37443	-1.31227	0.198044	0.390105
CTD-2005H7.2	-0.35786	-1.01691	0.316236	0.576594	-0.0254368	-0.0706039	0.944118	0.99342	-0.62857	-1.64092	0.109847	0.257468	0.28032	0.746499	0.460394	0.999971	-0.190679	-0.536998	0.594696	0.730921	-0.257262	-0.675555	0.5038	0.674215
CTD-2020K17.1	0.503625	1.95271	0.0589572	0.364903	0.592294	2.24319	0.0313723	0.718536	0.665112	2.36915	0.0235272	0.121079	0.380289	1.38182	0.17586	0.999971	0.901916	3.46577	0.00142677	0.0666694	0.814527	2.91846	0.00613615	0.056609
CTD-2023M8.1	0.673368	2.01703	0.0514811	0.358853	0.53541	1.56655	0.126294	0.833449	1.0024	2.75846	0.00920308	0.0825281	0.231679	0.65036	0.519743	0.999971	0.853201	2.53288	0.0159925	0.110709	1.0743	2.97374	0.00532143	0.0523503
CTD-2023N9.1	-0.538593	-1.4761	0.148935	0.441975	-0.489591	-1.31065	0.198585	0.870115	-0.332176	-0.836351	0.40868	0.568957	0.044007	0.113027	0.910661	0.999971	-0.450974	-1.22492	0.228854	0.404474	-0.342137	-0.866506	0.392165	0.583975
CTD-2047H16.3	0.405809	1.70923	0.0963392	0.397794	0.584376	2.40419	0.0216859	0.678604	0.83336	3.22461	0.00274791	0.0538983	-0.0276904	-0.109298	0.913596	0.999971	0.293191	1.22386	0.22925	0.40478	0.349687	1.36105	0.182272	0.37247
CTD-2047H16.4	0.454601	1.89667	0.0662203	0.372392	0.501549	2.04396	0.048605	0.757725	0.687078	2.63351	0.0125343	0.0934548	0.112589	0.440215	0.662511	0.999971	0.237244	0.98098	0.333393	0.509239	0.427124	1.64677	0.108633	0.279636
CTD-2066L21.2	-0.536673	-1.42781	0.162286	0.452446	0.0268054	0.0696595	0.944865	0.993641	-0.153285	-0.37465	0.7102	0.810669	0.257509	0.642033	0.52507	0.999971	0.32039	0.844774	0.404024	0.573523	0.169774	0.417395	0.678961	0.804123
CTD-2104P17.2	-0.32261	-0.98885	0.329582	0.585903	-0.454582	-1.36102	0.182282	0.865114	-0.404009	-1.13766	0.263058	0.431029	-0.251233	-0.721665	0.475335	0.999971	-0.595187	-1.80804	0.0792735	0.223112	-0.269127	-0.762303	0.45103	0.632561
CTD-2192J16.11	-0.359531	-1.17494	0.24802	0.522973	0.128231	0.409328	0.684815	0.957955	-0.56447	-1.69468	0.0990943	0.24282	-0.0616765	-0.188888	0.851281	0.999971	-0.583424	-1.88958	0.0671918	0.205786	-0.334636	-1.01057	0.319215	0.515863
CTD-2195M15.4	-0.0980173	-0.316223	0.753728	0.871114	-0.0227661	-0.0717428	0.943219	0.993271	-0.565727	-1.67674	0.102581	0.247432	0.0638682	0.1931	0.848007	0.999971	-0.610968	-1.95349	0.0588611	0.192682	-0.475522	-1.41768	0.165201	0.352318
CTD-2231E14.8	0.440258	2.2126	0.0336015	0.337718	0.378119	1.85619	0.0719345	0.789875	0.17833	0.823351	0.415931	0.575599	0.0385883	0.181742	0.856842	0.999971	0.135095	0.672878	0.505482	0.658804	0.125804	0.584261	0.562824	0.721131
CTD-2251F13.1	-0.608943	-1.82679	0.0763438	0.380775	-0.730581	-2.14081	0.0393949	0.735106	-0.672056	-1.85218	0.0725219	0.205491	0.480647	1.35128	0.185351	0.999971	-0.634281	-1.8858	0.0677148	0.206419	-0.183705	-0.509271	0.613785	0.758573
CTD-2275D24.1	-0.999001	-2.72864	0.00991352	0.300887	-0.563122	-1.50238	0.142044	0.843366	-0.622974	-1.56321	0.127078	0.279239	-0.99077	-2.53606	0.0158709	0.999971	-1.00203	-2.71246	0.0103199	0.0963952	-1.05673	-2.66724	0.0115392	0.0807167
CTD-2281M20.1	-0.83403	-2.32839	0.0258469	0.326256	-0.759316	-2.07059	0.0459012	0.74691	-1.08669	-2.78706	0.00856652	0.0804552	0.0266831	0.0698098	0.944746	0.999971	-0.406468	-1.12461	0.268472	0.444896	-0.191298	-0.493516	0.624757	0.765951
CTD-2291D10.1	-0.594974	-2.82372	0.00781081	0.300887	-0.115204	-0.534058	0.596707	0.945728	-0.568096	-2.47692	0.0182749	0.108655	-0.302228	-1.3442	0.187606	0.999971	-0.269446	-1.26735	0.213469	0.388327	-0.482717	-2.11706	0.041498	0.163999
CTD-2291D10.2	-0.661501	-1.83856	0.0745516	0.378428	-0.449107	-1.21926	0.23097	0.881361	-0.476464	-1.21659	0.23197	0.398096	-0.481906	-1.25521	0.217791	0.999971	-0.311027	-0.856738	0.397468	0.567504	-0.304656	-0.782482	0.439238	0.622931
CTD-2308L22.1	-0.534586	-1.29603	0.203518	0.487345	-0.925947	-2.19272	0.0351242	0.728972	-1.04712	-2.33219	0.0256221	0.125453	-0.457968	-1.0405	0.305305	0.999971	-0.473278	-1.13715	0.263266	0.439274	-1.07154	-2.40061	0.0218675	0.11534
CTD-2349P21.10	0.687636	2.31351	0.0267435	0.328416	0.27394	0.900256	0.374189	0.916563	0.555962	1.7184	0.0946347	0.23704	0.235672	0.743065	0.462443	0.999971	0.360067	1.2006	0.238037	0.414271	0.29711	0.923733	0.362004	0.555583
CTD-2350J17.1	-1.04035	-2.01544	0.051656	0.358865	-1.24179	-2.34984	0.0246017	0.6978	-1.6788	-2.98783	0.0051307	0.0665919	0.132527	0.240603	0.811279	0.999971	-0.641284	-1.23124	0.226512	0.402089	-0.345788	-0.619037	0.539935	0.702638
CTD-2358C21.5	0.872332	2.97646	0.00528402	0.294028	0.693149	2.31017	0.0269486	0.706108	0.328089	1.02844	0.31086	0.478591	0.24281	0.776412	0.442766	0.999971	0.397671	1.34476	0.187426	0.35938	0.205169	0.646916	0.521943	0.689408
CTD-2530H12.7	-1.22181	-1.90499	0.0650957	0.371278	-0.806072	-1.22761	0.227855	0.880255	-1.74448	-2.49875	0.0173512	0.105989	-0.434081	-0.634258	0.530072	0.999971	-0.722067	-1.11576	0.272193	0.448886	-1.00225	-1.44405	0.157693	0.342872
CTD-2540L5.6	-0.389193	-1.2002	0.238191	0.515015	-0.0721732	-0.217402	0.829169	0.98058	-0.416746	-1.18067	0.245765	0.412477	-0.586821	-1.6959	0.09886	0.999971	-1.13411	-3.46615	0.00142526	0.0666694	-0.983992	-2.80412	0.00820671	0.066128
CTD-2547E10.6	-0.104448	-0.261316	0.795394	0.895029	0.354075	0.865287	0.392824	0.918233	-0.0369301	-0.0848817	0.932843	0.960062	0.54203	1.27085	0.212234	0.999971	0.500789	1.24172	0.222667	0.397683	0.869046	2.00922	0.052343	0.185859
CTD-2547L24.3	0.396782	1.50177	0.142203	0.436652	0.796242	2.94371	0.0057504	0.552973	1.28384	4.46407	8.11837e-05	0.0312363	0.477343	1.69312	0.0993925	0.999971	0.857993	3.21839	0.00279409	0.0723179	1.35762	4.74839	3.48275e-05	0.004975
CTD-2589M5.5	-0.404078	-0.663344	0.511493	0.717969	-0.646236	-1.03625	0.307254	0.906095	-0.943582	-1.42305	0.16365	0.323895	-0.57358	-0.882417	0.383623	0.999971	-0.597972	-0.972876	0.337348	0.512768	-0.798645	-1.21156	0.233867	0.430858
CTD-2600O9.1	-0.609425	-1.71308	0.0956197	0.397431	-0.454811	-1.24878	0.220103	0.878292	-0.868255	-2.24219	0.0314432	0.137055	-0.443484	-1.16827	0.250663	0.999971	-1.00698	-2.8053	0.00818233	0.0908269	-1.00504	-2.6107	0.0132513	0.0871488
CTD-2621I17.6	-0.284966	-0.872576	0.388892	0.62964	-0.450518	-1.34748	0.186559	0.866706	-0.554688	-1.56037	0.127748	0.280121	-0.188514	-0.540955	0.591994	0.999971	-0.236526	-0.717781	0.477697	0.635201	-0.461804	-1.30673	0.199899	0.3923
CTD-3046C4.1	-0.332665	-1.06952	0.292217	0.55783	-0.31664	-0.994372	0.326926	0.908209	-0.344877	-1.01863	0.315429	0.483068	-0.00053032	-0.00159782	0.998734	0.999971	-0.690078	-2.1988	0.0346521	0.151296	-0.503233	-1.4951	0.143927	0.326249
CTD-3065J16.9	-0.0297487	-0.14428	0.886114	0.944111	-0.011949	-0.0566066	0.955183	0.994985	0.0719948	0.320779	0.750302	0.839576	-0.00621132	-0.0282311	0.97764	0.999971	0.270622	1.30078	0.201905	0.375462	0.0962915	0.431562	0.66873	0.796831
CTD-3131K8.3	0.710165	1.8874	0.0674927	0.372758	0.222182	0.576785	0.567808	0.941051	-0.0171231	-0.0418076	0.966892	0.98069	0.200957	0.500512	0.619874	0.999971	-0.0903256	-0.237914	0.813347	0.887184	-0.141808	-0.348276	0.729737	0.83826
CTD-3145H4.1	-0.83499	-2.11326	0.041843	0.346339	-0.610345	-1.50885	0.140388	0.843194	-1.01426	-2.35824	0.0241287	0.122248	0.165434	0.392376	0.69718	0.999971	-0.652385	-1.63636	0.110803	0.267096	-0.528164	-1.23526	0.225031	0.421504
CTD-3224K15.3	-0.672956	-2.0656	0.0463977	0.351372	-0.0367678	-0.110237	0.912857	0.990328	-0.562883	-1.58725	0.121528	0.272044	0.288412	0.829621	0.412424	0.999971	0.73143	2.22503	0.0326792	0.147622	-0.255429	-0.724515	0.473606	0.650981
CTDNEP1	0.646797	2.89047	0.00659198	0.299868	0.50049	2.18472	0.0357547	0.728972	0.726227	2.98154	0.00521501	0.0668144	0.130994	0.548603	0.58679	0.999971	0.709713	3.14331	0.00341272	0.0747944	0.66754	2.75674	0.00924283	0.0705769
CTH	-0.0371176	-0.186196	0.853375	0.926392	-0.189302	-0.927568	0.360039	0.914408	-0.461869	-2.12851	0.0404716	0.153641	0.0248901	0.11701	0.907527	0.999971	-0.246518	-1.22559	0.228608	0.404197	-0.0246259	-0.114156	0.909772	0.950679
CTNNAL1	0.618468	1.69418	0.099189	0.399806	0.942637	2.52224	0.0164053	0.645563	0.919801	2.31475	0.0266677	0.12752	0.548012	1.40682	0.168373	0.999971	0.643199	1.74619	0.0896266	0.238107	0.748001	1.89349	0.0666553	0.21332
CTNNBL1	0.227726	1.24565	0.221237	0.501413	0.289696	1.54784	0.130733	0.837636	0.725507	3.64581	0.000864925	0.0386875	0.185873	0.952815	0.347274	0.999971	0.54024	2.9287	0.00597692	0.0843981	0.873235	4.41401	9.41362e-05	0.00705444
CTSW	0.187371	0.636791	0.52844	0.729009	0.320594	1.06426	0.294559	0.903468	0.900668	2.81208	0.00804376	0.0783156	0.36445	1.16075	0.253666	0.999971	0.993542	3.34645	0.0019778	0.0678569	1.38016	4.33452	0.000118996	0.00770139
CTTN	0.516503	1.82757	0.076224	0.380775	0.88993	3.07578	0.00407836	0.52243	0.615604	2.0011	0.0532513	0.175059	0.702482	2.32939	0.0257874	0.999971	0.615747	2.15926	0.0378268	0.157354	0.497712	1.62741	0.112698	0.28483
CTTNBP2	-0.350536	-1.74935	0.0890713	0.392478	-0.664041	-3.23696	0.00265843	0.494801	-0.76873	-3.5244	0.00121339	0.0415635	-0.418081	-1.95529	0.0586408	0.999971	-0.519533	-2.56957	0.0146411	0.107199	-0.607883	-2.80337	0.00822221	0.0661665
CUL1	0.359771	1.5782	0.123594	0.421153	0.323596	1.38655	0.174422	0.863307	0.812329	3.27367	0.00240852	0.0518205	0.182687	0.751018	0.457705	0.999971	0.676487	2.94102	0.0057904	0.0838481	0.859685	3.48491	0.00135341	0.0251589
CXADR	-0.454296	-2.36567	0.0237175	0.322599	-0.215308	-1.09515	0.280993	0.896948	-0.505423	-2.4179	0.0210017	0.115649	-0.296124	-1.44509	0.157402	0.999971	-0.563258	-2.90687	0.00632118	0.0860822	-0.393896	-1.89546	0.0663854	0.212791
CXCL11	0.0436075	0.0589635	0.953319	0.977086	0.624769	0.825164	0.414915	0.921976	2.84937	3.53947	0.00116371	0.0408033	0.718013	0.909831	0.369188	0.999971	1.18694	1.59057	0.120775	0.280692	2.25582	2.81866	0.00791112	0.0649968
CXCL12	-0.843466	-3.01754	0.00474942	0.291155	-0.830508	-2.9022	0.00639719	0.563545	-0.58085	-1.90905	0.0645533	0.193678	-1.33531	-4.47686	7.81658e-05	0.417357	-1.32491	-4.69758	4.05386e-05	0.0533688	-1.15463	-3.8172	0.000532891	0.01542
CXCL8	0.432639	0.471213	0.640438	0.803231	2.35011	2.50022	0.0172906	0.653022	4.30048	4.30305	0.000130536	0.0313171	2.01323	2.05491	0.0474771	0.999971	3.49539	3.77304	0.000604134	0.060598	4.73433	4.76505	3.31343e-05	0.00491893
CXCR4	-0.157784	-0.694066	0.492261	0.70423	-0.908179	-3.90218	0.000418059	0.424192	-0.891202	-3.60148	0.00097916	0.0391043	-0.960514	-3.95957	0.000354554	0.631032	-0.970881	-4.2326	0.000160492	0.0593092	-1.05554	-4.29073	0.000135343	0.00812012
CXorf40A	0.44077	2.33387	0.0255233	0.325438	0.444919	2.30114	0.0275103	0.706108	0.660355	3.21225	0.00284035	0.0543087	0.100454	0.49847	0.621298	0.999971	0.763458	4.00638	0.000309809	0.0593092	0.741408	3.62776	0.000909782	0.0201667
CXorf40B	0.569231	2.75425	0.00930038	0.300887	0.293785	1.38849	0.173836	0.863307	0.760721	3.38149	0.00179776	0.0469671	0.169947	0.770611	0.446153	0.999971	0.501144	2.40315	0.0217384	0.124557	0.808786	3.61632	0.00093939	0.0206119
CYB561A3	-0.11306	-0.27	0.78876	0.891968	0.735127	1.71481	0.0952986	0.811733	1.91381	4.19876	0.000177182	0.0316065	0.703121	1.57359	0.124656	0.999971	1.56627	3.70703	0.000728123	0.0609839	2.33357	5.14983	1.04211e-05	0.00404174
CYB5A	0.109565	0.633537	0.530537	0.730416	0.107702	0.608306	0.546945	0.938679	0.375602	1.99524	0.0539154	0.176169	0.199889	1.08317	0.286203	0.999971	0.519822	2.97891	0.00525061	0.0824255	0.425021	2.27106	0.0294584	0.135434
CYB5D1	0.191841	0.815169	0.420535	0.65419	0.176436	0.732305	0.4689	0.9265	-0.0312452	-0.121971	0.903625	0.942159	-0.128332	-0.511032	0.612565	0.999971	-0.156148	-0.657576	0.515149	0.667089	0.133428	0.523926	0.60366	0.75108
CYCS	0.3443	1.23138	0.226461	0.505787	0.385262	1.34589	0.187066	0.866706	1.02951	3.38262	0.00179224	0.0468802	0.453746	1.52081	0.137369	0.999971	0.94301	3.34252	0.00199905	0.0681898	1.30946	4.32777	0.000121384	0.00776352
CYLD	0.404088	1.56568	0.126498	0.424714	0.386784	1.46384	0.152238	0.85192	0.913304	3.25094	0.00256043	0.052679	0.368549	1.33822	0.189527	0.999971	0.933428	3.58436	0.00102709	0.0641405	1.04305	3.73464	0.000673521	0.0173045
CYP2B6	-0.220234	-0.877785	0.386098	0.627269	-0.202544	-0.788536	0.435737	0.922555	-0.489284	-1.79156	0.081928	0.219437	0.119012	0.444529	0.65942	0.999971	-0.212956	-0.841195	0.405998	0.575236	-0.14737	-0.542788	0.590745	0.741501
CYP2C9	-0.593569	-1.80574	0.0796405	0.383506	-0.218429	-0.64907	0.520566	0.935746	-0.432945	-1.20999	0.23446	0.400854	-0.347503	-0.990714	0.328684	0.999971	-0.519766	-1.56709	0.126168	0.287095	-0.612578	-1.72211	0.0939524	0.258229
CYP2G2P	-0.813397	-2.64863	0.012079	0.306093	-0.505059	-1.60642	0.117245	0.826609	-0.791251	-2.36701	0.0236444	0.121274	-0.154295	-0.470842	0.6407	0.999971	-0.344325	-1.11119	0.274125	0.450877	-0.159143	-0.478876	0.635031	0.772714
CYP2J2	-0.250816	-1.19417	0.24051	0.516528	0.241866	1.12482	0.268385	0.892096	-0.261422	-1.14346	0.260676	0.428557	0.03175	0.141665	0.888164	0.999971	-0.283134	-1.336	0.190246	0.362606	-0.360426	-1.58578	0.12186	0.296951
CYP51A1	0.547159	1.61511	0.115343	0.414359	0.684941	1.97488	0.05628	0.771502	1.59373	4.32187	0.000123509	0.0312363	0.422484	1.16871	0.250487	0.999971	0.956506	2.79821	0.00832973	0.0913445	1.1768	3.21003	0.00285729	0.0371648
DAPP1	0.144216	0.499989	0.620238	0.790278	0.386999	1.31055	0.198616	0.870115	1.2327	3.92617	0.000390268	0.0329885	0.212481	0.690356	0.494562	0.999971	0.701247	2.40946	0.0214203	0.123778	1.22384	3.92091	0.0003962	0.0134316
DAW1	-0.547964	-2.30648	0.0271768	0.328507	-0.0472963	-0.194457	0.846952	0.982369	-0.523496	-2.02432	0.0506886	0.171083	-0.218081	-0.860243	0.395559	0.999971	-0.46447	-1.93757	0.0608478	0.195433	-0.381271	-1.48303	0.147093	0.330071
DAXX	0.33711	1.83502	0.0750869	0.379436	0.203437	1.08168	0.286856	0.899676	0.557647	2.78866	0.00853224	0.0803855	0.0337777	0.172308	0.864196	0.999971	0.500746	2.7014	0.0106065	0.0970141	0.648203	3.2606	0.00249482	0.0347504
DAZAP1	0.246328	1.16675	0.251265	0.525434	0.231534	1.07122	0.291464	0.902284	0.610745	2.65762	0.0118153	0.0915427	0.225446	1.00072	0.323887	0.999971	0.634529	2.97866	0.00525411	0.0824359	0.685144	2.99892	0.00498512	0.0503641
DAZL	-0.592168	-1.73867	0.0909592	0.394104	-0.258825	-0.742295	0.462904	0.924313	-0.572418	-1.54402	0.131655	0.284857	0.189632	0.521783	0.605136	0.999971	-0.491792	-1.43106	0.161359	0.329837	-0.0867772	-0.235448	0.815245	0.892765
DCAF13	0.239134	1.05913	0.296857	0.561868	0.247929	1.07259	0.290856	0.902007	0.583056	2.37239	0.023351	0.120752	0.19464	0.807883	0.424662	0.999971	0.544674	2.39083	0.0223719	0.125888	0.750295	3.07085	0.00413148	0.0455657
DCLK1	-0.737061	-2.91839	0.00613723	0.299868	-0.407143	-1.57465	0.12441	0.831925	-0.621666	-2.26133	0.0301142	0.134653	0.0954022	0.354001	0.72548	0.999971	-0.333245	-1.3077	0.199574	0.372783	-0.336768	-1.23222	0.226151	0.422663
DCLRE1A	0.236543	1.30888	0.199177	0.482714	0.179929	0.972498	0.337533	0.910207	0.464201	2.35974	0.0240454	0.122033	0.00458293	0.0237651	0.981176	0.999971	0.207905	1.14014	0.262036	0.438126	0.444382	2.27229	0.0293763	0.135207
DCLRE1C	0.405514	2.43888	0.0199925	0.32041	0.119095	0.699643	0.488814	0.930323	0.439506	2.42839	0.0204916	0.114555	0.0768711	0.433267	0.667502	0.999971	0.432262	2.57653	0.0143968	0.106727	0.36356	2.02059	0.0510924	0.18335
DCP1A	0.360246	2.10344	0.042748	0.346664	0.23416	1.3355	0.190408	0.867604	0.458622	2.4601	0.0190169	0.110609	0.000535509	0.00293025	0.997679	0.999971	0.415022	2.40162	0.021816	0.124748	0.413874	2.23315	0.0320893	0.142218
DCSTAMP	0.85119	1.22721	0.228005	0.506882	2.02095	2.84607	0.00738088	0.590192	2.6751	3.54323	0.00115162	0.0406479	1.37528	1.85819	0.0716425	0.999971	2.42532	3.46549	0.00142787	0.0666694	3.35455	4.46935	7.9925e-05	0.00655803
DCTPP1	0.231843	0.872195	0.389097	0.629866	0.345643	1.27012	0.212492	0.874602	0.821338	2.83862	0.00752161	0.0762967	0.375755	1.32474	0.193916	0.999971	1.02769	3.83162	0.000511456	0.060598	1.40004	4.86718	2.4398e-05	0.00461408
DCUN1D3	0.223213	0.716858	0.478259	0.694717	0.638725	2.00367	0.0529625	0.764191	1.23571	3.64583	0.00086487	0.0386875	0.538852	1.62177	0.113905	0.999971	1.10845	3.52803	0.00120122	0.0665296	1.42467	4.22808	0.000162628	0.00869418
DDC	-0.424757	-1.64686	0.108615	0.407855	-0.180515	-0.683642	0.498741	0.932231	-0.568201	-2.02388	0.0507358	0.171116	-0.452737	-1.64501	0.108998	0.999971	-0.821293	-3.15585	0.00330098	0.0744435	-0.878971	-3.14925	0.00335934	0.0405695
DDHD1	0.344597	1.71885	0.0945517	0.396502	0.243962	1.18863	0.242655	0.88601	0.459082	2.1037	0.042724	0.15747	0.100663	0.470545	0.64091	0.999971	0.573184	2.8335	0.00761978	0.0896098	0.510299	2.35217	0.0244697	0.122895
DDIT4	-0.138232	-0.333477	0.740781	0.863392	-1.50991	-3.55802	0.00110525	0.451754	-2.13604	-4.73406	3.63518e-05	0.0305198	-1.61687	-3.65544	0.000841867	0.721855	-1.84872	-4.4201	9.24567e-05	0.0533688	-2.49228	-5.55612	3.05159e-06	0.00335464
DDX21	0.306202	1.13065	0.265958	0.53731	0.301416	1.08713	0.284471	0.898292	0.899378	3.0509	0.00435321	0.0625683	0.314561	1.0885	0.283875	0.999971	0.872932	3.19449	0.00297833	0.0727799	1.17399	4.0059	0.000310238	0.0117463
DDX39A	0.307411	1.41598	0.165695	0.455009	0.329311	1.48164	0.14746	0.847331	0.747674	3.16386	0.00323148	0.0565244	0.244207	1.05415	0.299098	0.999971	0.683506	3.12021	0.00362788	0.0755901	0.914432	3.8923	0.000430059	0.0139785
DDX5	0.495213	2.00754	0.0525297	0.359127	0.325972	1.29077	0.205316	0.872512	0.628588	2.34102	0.0251068	0.124471	0.229672	0.872541	0.388911	0.999971	0.741085	2.97744	0.00527068	0.0824371	0.757437	2.8375	0.00754314	0.0633508
DDX58	0.569056	1.77428	0.0847918	0.388282	0.553338	1.68522	0.100921	0.81513	1.36923	3.92201	0.000394953	0.0329885	0.336359	0.982825	0.332497	0.999971	0.845471	2.61257	0.0131911	0.10383	1.15924	3.34009	0.00201227	0.0309755
DDX60	0.52725	1.35252	0.184958	0.46982	0.659748	1.65311	0.107328	0.81971	1.78524	4.20716	0.00017289	0.0316065	0.348892	0.838731	0.407361	0.999971	0.893349	2.27117	0.0294507	0.141157	1.45359	3.44575	0.00150757	0.0265306
DDX60L	0.70733	2.28534	0.0285186	0.331108	0.748278	2.36151	0.0239469	0.692768	1.34115	3.98084	0.000333493	0.0319398	0.278426	0.843032	0.404984	0.999971	0.724671	2.32045	0.0263217	0.134828	0.828598	2.47394	0.0184044	0.10411
DECR1	0.283014	1.30938	0.199011	0.482461	0.299399	1.35302	0.184797	0.865852	0.818742	3.47993	0.00137213	0.0435407	0.177668	0.770322	0.446322	0.999971	0.596735	2.73616	0.00972973	0.0944987	0.700911	2.99665	0.00501452	0.0505705
DEFB108B	-0.778156	-2.04011	0.0490077	0.355833	-0.0703171	-0.180072	0.858143	0.984056	-0.676096	-1.62841	0.112485	0.260761	-0.203265	-0.49941	0.620643	0.999971	-0.397086	-1.03175	0.309327	0.486467	-0.540952	-1.31058	0.198608	0.390911
DEFB132	-0.284229	-0.853171	0.399415	0.638227	-0.151264	-0.443509	0.66015	0.954243	-0.39972	-1.10228	0.277928	0.445641	-0.118758	-0.334068	0.740339	0.999971	-0.61309	-1.82387	0.0767933	0.219534	-0.11175	-0.309978	0.758432	0.856427
DENND1B	0.388037	1.65902	0.106124	0.405898	0.30401	1.2696	0.212677	0.874602	0.667601	2.62219	0.0128856	0.0942643	0.227438	0.911273	0.368438	0.999971	0.659202	2.79319	0.00843553	0.0914459	0.74001	2.92371	0.00605394	0.0561295
DENND5A	0.492091	2.28108	0.0287959	0.331363	0.458942	2.07803	0.0451699	0.746235	0.746267	3.17802	0.00311203	0.0555935	0.347086	1.50778	0.140661	0.999971	0.752418	3.45666	0.001463	0.0666694	0.816875	3.49919	0.00130105	0.0246123
DENND5B	0.135171	0.745204	0.461166	0.682041	0.285168	1.53565	0.133694	0.84048	0.467753	2.36906	0.0235323	0.121079	0.129721	0.670207	0.507162	0.999971	0.257592	1.40743	0.168194	0.338307	0.56876	2.8976	0.00647306	0.0583696
DEPTOR	-0.204844	-0.727288	0.471928	0.690356	-0.709771	-2.4615	0.0189545	0.657171	-0.794578	-2.59171	0.0138772	0.0966158	-0.47711	-1.58748	0.121476	0.999971	-0.813004	-2.86074	0.00711101	0.0882638	-0.59507	-1.9524	0.0589961	0.198881
DEUP1	-0.680015	-2.05158	0.0478173	0.353802	-0.468354	-1.3802	0.176351	0.863307	-0.840287	-2.32898	0.0258117	0.125876	0.220255	0.622733	0.537531	0.999971	-0.32593	-0.974536	0.336535	0.512096	-0.125065	-0.348677	0.729439	0.8381
DHCR24	0.366322	1.05055	0.300726	0.565309	0.810382	2.27009	0.0295233	0.710871	1.18857	3.13145	0.00352156	0.0582841	0.592969	1.59365	0.120084	0.999971	1.30658	3.71359	0.000714771	0.0608829	1.46338	3.87818	0.000447798	0.0141792
DHDH	-0.288276	-0.856712	0.397482	0.63654	-0.27853	-0.808529	0.424294	0.922094	-0.648759	-1.77124	0.0853047	0.224225	-0.0556872	-0.155091	0.877648	0.999971	-0.752328	-2.21583	0.0333594	0.148913	-0.629711	-1.72936	0.0926331	0.256171
DHX37	0.294496	1.59205	0.120443	0.418507	0.287327	1.51723	0.138266	0.842565	0.553012	2.74649	0.00948225	0.083754	0.170746	0.865036	0.39296	0.999971	0.405265	2.1713	0.0368339	0.155589	0.494159	2.46866	0.0186361	0.104798
DHX38	0.322157	2.03774	0.0492564	0.356246	0.195141	1.20567	0.2361	0.882548	0.366773	2.13131	0.0402244	0.153294	0.0579534	0.343532	0.733271	0.999971	0.418921	2.62614	0.012762	0.102452	0.517444	3.02457	0.00466318	0.0486536
DHX58	0.447254	1.47582	0.149009	0.441979	0.678539	2.18702	0.035572	0.728972	1.35312	4.10189	0.000234955	0.0316065	0.250664	0.775135	0.44351	0.999971	0.65913	2.15553	0.0381396	0.157663	1.01361	3.09079	0.00392048	0.0441917
DIABLO	0.190764	0.950329	0.348517	0.600448	0.207068	1.0076	0.32062	0.907865	0.462146	2.11506	0.0416791	0.155941	0.128393	0.59941	0.552793	0.999971	0.358438	1.76968	0.0855686	0.232437	0.346106	1.59332	0.120157	0.294752
DIAPH1	0.4695	1.84043	0.0742695	0.377849	0.496647	1.90165	0.0655453	0.785114	0.959199	3.4543	0.00147255	0.044191	0.153336	0.563293	0.576857	0.999971	0.894541	3.47526	0.00138994	0.0666694	1.03089	3.73433	0.000674112	0.0173045
DIO3OS	-0.339777	-1.22084	0.230376	0.508512	-0.285913	-1.00346	0.322586	0.907865	-0.525924	-1.73603	0.0914312	0.232788	-0.230087	-0.774755	0.443732	0.999971	-0.76029	-2.70738	0.0104508	0.0968555	-0.503753	-1.67264	0.103393	0.272383
DLD	0.368547	1.58103	0.122945	0.420756	0.321607	1.34763	0.18651	0.866706	0.805504	3.17455	0.00314095	0.0558913	0.206185	0.828915	0.412818	0.999971	0.696393	2.96077	0.00550288	0.0831941	0.910006	3.60752	0.000962788	0.0208547
DLEC1P1	-0.788387	-1.65129	0.107702	0.40752	-0.364873	-0.746491	0.460398	0.924313	-0.831581	-1.60013	0.118636	0.268791	0.168612	0.330962	0.742663	0.999971	-0.0936155	-0.194328	0.847052	0.90964	-0.335018	-0.648439	0.520969	0.688595
DLG3	0.275066	1.82676	0.0763482	0.380775	0.172555	1.11936	0.270673	0.89351	0.277173	1.69108	0.0997862	0.243619	-0.0292988	-0.182348	0.856371	0.999971	0.197803	1.30191	0.201523	0.375127	0.216431	1.32826	0.192763	0.384148
DMXL2	0.160782	0.427169	0.671895	0.821939	0.356501	0.92517	0.361267	0.914526	1.43399	3.50005	0.00129798	0.0430313	0.397389	0.989427	0.329303	0.999971	1.10902	2.92014	0.00610981	0.084986	1.73744	4.26569	0.000145662	0.00836269
DNAH6	-0.346811	-1.85432	0.0722084	0.376093	-0.340704	-1.77937	0.0839392	0.803176	-0.572422	-2.81174	0.00805065	0.0783156	-0.0983401	-0.492752	0.625291	0.999971	-0.38284	-2.02867	0.0502203	0.178243	-0.349724	-1.72796	0.0928864	0.256623
DNAH8	-0.418088	-1.85731	0.0717703	0.375726	-0.269252	-1.16835	0.250628	0.887811	-0.585582	-2.38986	0.0224226	0.11864	-0.180374	-0.750924	0.45776	0.999971	-0.458624	-2.01919	0.0512453	0.180041	-0.453846	-1.86313	0.0709258	0.220848
DNAJA1	0.289574	0.944677	0.351355	0.602253	0.423557	1.34969	0.185855	0.866492	1.20671	3.61655	0.000938781	0.0388724	0.458015	1.40026	0.170312	0.999971	1.01762	3.29014	0.00230386	0.0703391	1.52086	4.58492	5.67167e-05	0.00579933
DNAJA4	0.350753	2.15691	0.038024	0.342769	0.352496	2.1173	0.0414766	0.735687	0.353071	1.99461	0.0539871	0.176243	0.125709	0.724438	0.473653	0.999971	0.390856	2.38204	0.0228341	0.126794	0.493643	2.80517	0.00818499	0.0660411
DNAJB1P1	-0.262889	-0.573972	0.569689	0.757442	-0.0517779	-0.110424	0.91271	0.990328	-0.24031	-0.482011	0.632824	0.752515	0.0705089	0.144268	0.886124	0.999971	-0.207674	-0.44937	0.655959	0.777925	-0.417409	-0.842165	0.405462	0.5949
DNAJB6	0.3341	1.45121	0.155702	0.446513	0.39411	1.67213	0.103493	0.81513	0.791131	3.15696	0.0032913	0.0569276	0.393141	1.60033	0.118592	0.999971	0.75336	3.24309	0.00261501	0.0713064	0.98144	3.93944	0.000375679	0.013047
DNAJC10	0.150702	0.615043	0.542539	0.738447	0.193754	0.772387	0.445114	0.922942	0.79791	2.99163	0.00508039	0.0664422	0.304338	1.16399	0.252368	0.999971	0.771534	3.12064	0.00362367	0.0755901	1.11048	4.18806	0.000182806	0.00919738
DNAJC11	0.197186	1.13013	0.266172	0.537448	0.248855	1.39315	0.172435	0.862237	0.533682	2.80997	0.00808654	0.0784465	0.120725	0.648422	0.52098	0.999971	0.424421	2.41075	0.0213558	0.123584	0.52168	2.76296	0.00910015	0.070051
DNAJC7	0.325646	1.85959	0.0714379	0.375408	0.198392	1.10661	0.276074	0.894863	0.505903	2.65404	0.0119196	0.0918703	0.17467	0.934757	0.356373	0.999971	0.508375	2.87714	0.00682023	0.0875789	0.640302	3.3789	0.00181052	0.0292829
DNMT1	0.359342	1.69001	0.0999916	0.400573	0.343554	1.57824	0.123583	0.831052	0.882363	3.81238	0.000540258	0.0346387	0.317796	1.40067	0.170191	0.999971	0.775611	3.61517	0.000942421	0.062681	1.01297	4.40247	9.73986e-05	0.00714428
DNMT3L	-0.46315	-1.22399	0.229201	0.507546	-0.200007	-0.516298	0.608921	0.947049	-0.649598	-1.57714	0.123838	0.275149	0.0779754	0.193117	0.847993	0.999971	-0.474463	-1.24269	0.222314	0.39739	-0.519363	-1.26837	0.21311	0.407347
DNPEP	0.201753	0.930057	0.358767	0.607692	0.273235	1.23034	0.226846	0.880255	0.825068	3.49419	0.00131919	0.0432474	0.193185	0.834581	0.409663	0.999971	0.721537	3.29648	0.00226468	0.069795	1.01696	4.33224	0.000119798	0.0077066
DNTTIP2	0.279074	1.3527	0.184901	0.469731	0.159896	0.757037	0.454137	0.923659	0.589251	2.62391	0.0128315	0.0941749	0.240067	1.09049	0.283012	0.999971	0.529698	2.54457	0.01555	0.109607	0.737773	3.30463	0.00221538	0.0325534
DOCK10	0.454145	1.91198	0.064164	0.370294	0.367027	1.50933	0.140266	0.843194	0.936427	3.62184	0.000924979	0.03885	0.295212	1.16474	0.25207	0.999971	0.789742	3.29516	0.0022728	0.0699442	1.1223	4.36629	0.000108368	0.00741816
DOCK5	0.50456	2.67684	0.0112698	0.305645	0.635537	3.29344	0.00228342	0.494801	0.68499	3.33857	0.0020206	0.0483973	0.172363	0.856961	0.397346	0.999971	0.540375	2.84124	0.0074719	0.0890023	0.632352	3.10017	0.00382482	0.0436487
DOLPP1	0.199743	1.00765	0.320599	0.579999	0.235128	1.15862	0.254523	0.888798	0.645742	2.9927	0.00506627	0.0663211	0.303758	1.43605	0.159941	0.999971	0.494383	2.47175	0.0185005	0.11706	0.76059	3.54572	0.00114367	0.0229302
DPM2	0.288783	1.63346	0.111415	0.410726	0.152443	0.84225	0.405415	0.919959	0.348929	1.81318	0.0784618	0.21451	0.0722777	0.38313	0.70396	0.999971	0.305141	1.71056	0.0960892	0.246933	0.438535	2.29223	0.0280751	0.131763
DRAM1	-0.0453132	-0.108606	0.914141	0.958094	0.564285	1.32107	0.195123	0.86973	1.65633	3.64707	0.000861868	0.0386875	0.769839	1.72916	0.0926681	0.999971	1.55867	3.70244	0.000737606	0.0613147	2.24666	4.97603	1.75923e-05	0.00427071
DSE	0.186756	0.569368	0.572773	0.759663	0.442008	1.31628	0.196708	0.869822	1.3682	3.8321	0.000510754	0.034518	0.495739	1.41638	0.165579	0.999971	1.15521	3.49047	0.00133282	0.0666694	1.7719	4.99202	1.67659e-05	0.00424194
DSG2-AS1	-0.763249	-2.35897	0.0240882	0.323375	-0.153602	-0.463715	0.645748	0.951989	-0.787496	-2.236	0.0318842	0.137868	0.229241	0.66398	0.511091	0.999971	-0.626812	-1.91998	0.0631109	0.19902	-0.3133	-0.894816	0.37705	0.569831
DTHD1	0.336976	1.7428	0.0902249	0.393448	0.523757	2.64592	0.0121593	0.616116	0.644571	3.06257	0.00422217	0.0619204	0.356674	1.72872	0.0927474	0.999971	0.399301	2.04669	0.0483221	0.175159	0.670569	3.20486	0.00289703	0.0374151
DTX2	0.20519	1.37769	0.177119	0.464177	0.177038	1.16108	0.253535	0.888798	0.452929	2.79379	0.00842294	0.0799319	0.120027	0.755238	0.455202	0.999971	0.259887	1.72935	0.0926338	0.242466	0.341557	2.11922	0.0413025	0.163582
DTX3L	0.444091	1.3	0.202168	0.485948	0.516272	1.47622	0.148903	0.849524	1.51138	4.06456	0.000261826	0.0316065	0.276531	0.758618	0.453203	0.999971	1.02651	2.9781	0.00526171	0.0824359	1.46392	3.96011	0.000354007	0.0126117
DUSP14	0.475424	2.74417	0.00953735	0.300887	0.420451	2.37052	0.0234524	0.692185	0.296812	1.57391	0.124583	0.276016	0.235658	1.27473	0.210874	0.999971	0.358479	2.05068	0.0479106	0.174319	0.186148	0.992903	0.327631	0.523646
DUSP26	-0.543412	-1.45727	0.154033	0.446158	-0.744898	-1.95122	0.0591417	0.775871	-0.870972	-2.14576	0.0389687	0.15113	-0.264176	-0.663911	0.511135	0.999971	-0.824337	-2.19087	0.0352687	0.152704	-0.715291	-1.7726	0.085075	0.244328
DUSP4	0.407441	1.39849	0.170839	0.459545	0.84606	2.83658	0.00756073	0.590192	0.762522	2.40444	0.021673	0.116968	-0.11737	-0.377534	0.708076	0.999971	0.437643	1.48874	0.14559	0.311171	0.581146	1.8433	0.0738391	0.226161
DUSP5	0.440669	1.01398	0.317613	0.577535	0.887325	1.99433	0.0540197	0.768609	1.73056	3.6582	0.000835351	0.0384334	0.410106	0.884337	0.382601	0.999971	1.04186	2.3759	0.0231616	0.127691	1.55134	3.29867	0.00225132	0.0328722
DUSP6	0.486665	0.952097	0.347633	0.599501	1.14591	2.18978	0.0353549	0.728972	2.62258	4.71353	3.86523e-05	0.0305198	0.989114	1.81344	0.0784205	0.999971	1.85683	3.60019	0.000982695	0.0632166	2.70776	4.89529	2.24238e-05	0.00451809
DUX4L37	-1.11729	-2.085	0.0444933	0.349757	-1.17235	-2.13697	0.0397287	0.735106	-1.20909	-2.07285	0.0456781	0.162476	-0.273457	-0.478232	0.635485	0.999971	0.033482	0.0619237	0.950979	0.972587	-0.573628	-0.989213	0.329406	0.525368
DUXAP8	-0.81764	-3.38695	0.00177115	0.250463	-0.488142	-1.97511	0.0562528	0.771502	-0.915068	-3.48231	0.00136316	0.0435407	-0.166286	-0.645519	0.522837	0.999971	-0.46598	-1.91301	0.0640268	0.200653	-0.218842	-0.837714	0.407924	0.597056
DYNAP	-0.684011	-1.79762	0.0809443	0.384391	-0.742605	-1.9063	0.0649207	0.784023	-0.836556	-2.01974	0.0511849	0.171938	-0.0831625	-0.204818	0.838911	0.999971	-0.676081	-1.7609	0.0870658	0.234727	-0.752848	-1.82835	0.0761044	0.229981
DYNC2LI1	0.207061	1.4764	0.148855	0.441975	0.129993	0.905363	0.371516	0.916323	0.000862157	0.00564751	0.995526	0.997527	-0.176575	-1.17988	0.246073	0.999971	-0.19403	-1.37112	0.17914	0.350397	-0.0913136	-0.601667	0.551307	0.711366
DYNLL1P1	-0.783909	-1.36595	0.180743	0.466429	-1.3907	-2.36701	0.0236441	0.692185	-0.947425	-1.51663	0.138417	0.293205	0.587957	0.96011	0.343642	0.999971	0.507824	0.876971	0.386534	0.558174	0.347546	0.559626	0.579329	0.733181
DYTN	-0.530136	-2.32553	0.0260168	0.326951	-0.428785	-1.83727	0.0747462	0.789875	-0.426151	-1.71738	0.0948241	0.237142	-0.291926	-1.20009	0.238234	0.999971	-0.479876	-2.08625	0.0443733	0.168525	-0.476944	-1.93339	0.0613793	0.203292
E2F1	0.197047	0.844827	0.403995	0.64178	0.288443	1.20797	0.235226	0.882548	0.356191	1.40297	0.16951	0.330894	0.044823	0.180097	0.858124	0.999971	0.316615	1.34534	0.18724	0.359223	0.42016	1.66468	0.104982	0.274321
E2F4	0.334734	1.85949	0.0714534	0.375408	0.14501	0.786848	0.436712	0.922555	0.514963	2.62807	0.0127021	0.0938596	0.110197	0.573682	0.569883	0.999971	0.539238	2.96877	0.00539022	0.0828581	0.735735	3.77687	0.000597602	0.0162223
E2F5	0.208352	1.05319	0.29953	0.564253	0.130138	0.642557	0.524734	0.936219	0.310281	1.4409	0.158577	0.317901	0.284273	1.34664	0.186825	0.999971	0.4227	2.11761	0.0414483	0.163735	0.449988	2.10198	0.0428844	0.166941
EAF1	0.278644	1.10178	0.278139	0.54632	0.286522	1.10663	0.276066	0.894863	0.90718	3.29539	0.00227139	0.050863	0.299293	1.10904	0.275038	0.999971	0.779967	3.05651	0.00428975	0.0783168	0.987421	3.60799	0.000961503	0.0208374
EAF2	0.328557	1.3356	0.190376	0.475141	0.357464	1.41937	0.164713	0.857073	0.518468	1.93621	0.0610204	0.188185	0.316347	1.20513	0.236307	0.999971	0.699458	2.81792	0.00792597	0.0904215	0.830496	3.11974	0.0036323	0.0424497
ECE1	0.490394	2.61367	0.0131561	0.308921	0.34258	1.78347	0.0832586	0.800928	0.62438	3.05718	0.00428217	0.0622366	-0.00776016	-0.0387599	0.969304	0.999971	0.44444	2.34758	0.0247298	0.131348	0.42052	2.07114	0.0458469	0.173536
ECEL1P3	-0.982031	-2.7851	0.00860886	0.300887	-0.777978	-2.15517	0.0381698	0.735106	-0.0505545	-0.131717	0.895969	0.937241	-0.858905	-2.2828	0.0286838	0.999971	-1.06208	-2.98521	0.00516557	0.0821113	-0.6724	-1.76222	0.0868393	0.247207
EDEM1	0.468005	1.82727	0.0762691	0.380775	0.410244	1.56456	0.12676	0.833449	0.905994	3.24972	0.0025689	0.052679	0.177835	0.650694	0.519529	0.999971	0.880126	3.40566	0.00168285	0.0669683	1.02544	3.69982	0.000743077	0.0181423
EDN3	-0.288766	-1.14074	0.261791	0.534481	-0.436577	-1.68461	0.101039	0.81513	-0.774722	-2.81159	0.00805361	0.0783265	-0.283722	-1.05036	0.300813	0.999971	-0.813802	-3.18611	0.00304567	0.073227	-0.93145	-3.40029	0.00170774	0.0282015
EDNRB	-0.195904	-0.644412	0.523546	0.725679	-0.522323	-1.67825	0.102283	0.81513	-0.508134	-1.53555	0.133716	0.28767	-0.137488	-0.423829	0.674306	0.999971	-0.561074	-1.82912	0.0759851	0.21857	-0.621921	-1.89048	0.0670679	0.213956
EED	0.361549	1.58882	0.121172	0.419216	0.291725	1.25222	0.218865	0.877578	0.615811	2.48612	0.0178804	0.107663	0.188643	0.776882	0.442492	0.999971	0.522249	2.27451	0.0292285	0.140611	0.624532	2.53618	0.0158665	0.0962014
EEF1A1P25	0.0478544	0.196469	0.845389	0.922112	0.0218833	0.0877573	0.930574	0.991875	0.0746825	0.281681	0.779861	0.860269	-0.514901	-1.98108	0.0555512	0.999971	-0.0636923	-0.259156	0.797046	0.876927	-0.401627	-1.52374	0.136635	0.317211
EEF1E1	0.330024	1.27414	0.21108	0.49264	0.277251	1.04555	0.302999	0.905659	0.611323	2.16825	0.0370831	0.148232	0.157356	0.569327	0.572802	0.999971	0.63591	2.43316	0.0202631	0.121462	0.626772	2.23614	0.0318742	0.141593
EEF1GP3	-0.68016	-2.51964	0.0165074	0.31562	-0.394945	-1.4291	0.161915	0.856068	-0.754437	-2.56754	0.0147128	0.0989512	0.275116	0.955104	0.346132	0.999971	0.0608473	0.223394	0.824538	0.894957	-0.12279	-0.420349	0.676822	0.802534
EFCAB1	-0.383655	-1.4164	0.165573	0.454821	-0.31376	-1.13147	0.265618	0.889772	-0.819063	-2.77798	0.00876402	0.080779	-0.110317	-0.381674	0.70503	0.999971	-0.659733	-2.41388	0.0212	0.12323	-0.317427	-1.08294	0.286301	0.483455
EFCAB12	-0.314536	-1.36504	0.181025	0.466712	-0.171904	-0.728717	0.471064	0.926631	-0.628034	-2.50395	0.0171375	0.105495	0.0804767	0.327305	0.745404	0.999971	-0.268286	-1.15392	0.256418	0.432767	-0.466738	-1.87183	0.0696787	0.218547
EFCC1	-0.792061	-2.7474	0.00946081	0.300887	-0.554507	-1.87875	0.0686996	0.785976	-0.941589	-3.00049	0.00496479	0.0657865	-0.458198	-1.48944	0.145405	0.999971	-0.311458	-1.0707	0.291697	0.468962	-0.679291	-2.17739	0.0363404	0.152482
EFHB	-0.271971	-1.23945	0.223497	0.50309	-0.0177399	-0.0789686	0.937511	0.993036	-0.0694163	-0.290625	0.773068	0.855358	0.140769	0.6012	0.551614	0.999971	-0.492636	-2.22502	0.0326798	0.147622	-0.256802	-1.08148	0.286941	0.484129
EFR3A	0.403544	1.61107	0.116224	0.415075	0.325139	1.26792	0.213268	0.874674	0.835087	3.06283	0.00421934	0.0619204	0.356982	1.3356	0.190375	0.999971	0.852437	3.37279	0.00184096	0.0669683	1.10335	4.07055	0.000257326	0.0107973
EGFEM1P	-0.483891	-2.28995	0.0282207	0.331015	-0.390468	-1.80495	0.0797669	0.797694	-0.514321	-2.23605	0.0318806	0.137868	-0.136625	-0.605922	0.54851	0.999971	-0.53559	-2.51197	0.0168128	0.112701	-0.580755	-2.53974	0.0157312	0.0957674
EGR2	0.626348	1.03878	0.30609	0.56932	1.58931	2.57464	0.0144628	0.636847	2.37316	3.61579	0.000940772	0.0388988	1.16649	1.81299	0.0784906	0.999971	2.26397	3.72121	0.000699569	0.0608829	2.77853	4.25836	0.000148827	0.00836328
EHHADH-AS1	-0.583011	-1.98045	0.0556244	0.361271	-0.53968	-1.7907	0.082069	0.799758	-0.918995	-2.86793	0.00698219	0.0740506	0.0921848	0.293463	0.770916	0.999971	-0.554166	-1.86565	0.0705623	0.210421	-0.413188	-1.29704	0.203177	0.396113
EIF1AD	0.383102	2.31202	0.0268348	0.328416	0.0923714	0.54452	0.589566	0.944589	0.403823	2.2389	0.0316765	0.137419	0.0201811	0.114137	0.909787	0.999971	0.375206	2.24414	0.0313053	0.144829	0.495063	2.76093	0.0091464	0.0701689
EIF2AK2	0.769388	2.25057	0.0308549	0.334765	0.76589	2.18833	0.0354688	0.728972	1.49136	4.00771	0.000308618	0.031689	0.177417	0.486349	0.629777	0.999971	0.815233	2.36337	0.0238441	0.129302	1.02406	2.76815	0.00898258	0.0695391
EIF2AK3	0.39499	2.02475	0.0506416	0.357851	0.265748	1.33062	0.191992	0.868466	0.552259	2.60074	0.0135765	0.0960357	0.240185	1.15382	0.256459	0.999971	0.497949	2.52973	0.0161137	0.110949	0.744228	3.52541	0.00120999	0.0236328
EIF2B3	0.188607	1.0304	0.309953	0.571339	0.269606	1.43872	0.15919	0.855535	0.560096	2.8111	0.00806361	0.0783702	0.200265	1.02532	0.312308	0.999971	0.437833	2.3706	0.0234485	0.128443	0.712213	3.59562	0.000995316	0.0212362
EIF2B5	0.319475	1.86848	0.0701564	0.374711	0.249782	1.42696	0.162528	0.856821	0.605089	3.25116	0.00255895	0.052679	0.143736	0.787816	0.436153	0.999971	0.453718	2.62991	0.012645	0.102187	0.564513	3.051	0.00435204	0.0468256
EIF3LP3	-0.239162	-0.568676	0.573238	0.759935	-0.494526	-1.14858	0.258586	0.888798	-0.624048	-1.36319	0.181601	0.344146	0.339925	0.757464	0.453885	0.999971	-0.429852	-1.01296	0.318088	0.495014	-0.283385	-0.622683	0.537564	0.701022
EIF4A1	0.327661	1.6141	0.115563	0.414359	0.1721	0.828104	0.413271	0.921339	0.48682	2.20314	0.0343185	0.142668	0.216557	0.999733	0.32436	0.999971	0.645318	3.15053	0.003348	0.0744585	0.734792	3.34494	0.00198595	0.0307618
EIF4E2P2	-0.374242	-1.01327	0.317942	0.57789	-0.0209219	-0.0553316	0.956192	0.994985	-0.490556	-1.2202	0.230617	0.396779	0.0916361	0.232513	0.817506	0.999971	-0.782624	-2.10005	0.0430642	0.166274	-0.662892	-1.65857	0.106216	0.276204
ELF4	0.699086	3.2239	0.00275316	0.26734	0.501701	2.25992	0.0302101	0.715094	0.965118	4.08883	0.000244037	0.0316065	0.0816608	0.352915	0.726287	0.999971	0.742548	3.39374	0.00173862	0.0669683	0.904099	3.85287	0.000481381	0.014634
ELK4	0.440959	1.84615	0.0734144	0.37733	0.269564	1.10238	0.277885	0.895975	0.545674	2.09879	0.0431822	0.158427	0.0909873	0.35699	0.723261	0.999971	0.59315	2.46114	0.0189704	0.118143	0.616029	2.38335	0.0227646	0.117851
ELOVL5	0.377917	1.71249	0.0957303	0.397608	0.300153	1.32853	0.192673	0.869164	0.917845	3.82092	0.000527283	0.0345569	0.213842	0.908091	0.370094	0.999971	0.769064	3.45379	0.0014746	0.0666694	0.884684	3.70456	0.000733212	0.018041
EML4	0.453915	1.75829	0.0875162	0.391071	0.466293	1.7643	0.086483	0.80729	0.981295	3.49206	0.00132695	0.0433671	0.392391	1.42443	0.163253	0.999971	0.999025	3.83526	0.000506177	0.060598	1.16583	4.17318	0.000190921	0.00941273
EMP2	-0.6356	-3.20092	0.00292768	0.26734	-0.678623	-3.33824	0.00202242	0.485654	-1.00546	-4.6518	4.64725e-05	0.0305198	-0.460564	-2.17364	0.0366437	0.999971	-0.736412	-3.67548	0.000795765	0.0618063	-0.869195	-4.04506	0.000277039	0.0110656
ENKUR	-0.560717	-2.21424	0.0334781	0.337718	-0.208381	-0.803781	0.426995	0.922417	-0.535883	-1.9441	0.0600266	0.186411	-0.371633	-1.37531	0.177849	0.999971	-0.602695	-2.35875	0.0241004	0.129884	-0.913285	-3.33276	0.00205274	0.0312265
ENO1-IT1	0.309521	1.39466	0.171983	0.460166	0.286856	1.26253	0.215178	0.875614	0.534352	2.21194	0.0336511	0.141329	-0.195139	-0.824004	0.415565	0.999971	-0.125663	-0.561161	0.578293	0.718159	0.165628	0.689651	0.495	0.667464
ENO2	0.511492	3.71622	0.00070948	0.236761	0.355324	2.52166	0.0164281	0.645563	0.298342	1.99133	0.0543628	0.176909	0.0502767	0.342323	0.734173	0.999971	0.229633	1.65348	0.107253	0.262614	0.193833	1.30139	0.2017	0.394558
ENO3	0.330926	2.07109	0.0458519	0.351339	0.320134	1.95703	0.0584271	0.774491	0.344197	1.97899	0.0557964	0.178983	0.239593	1.40523	0.168842	0.999971	0.381123	2.36394	0.0238128	0.129302	0.573086	3.3144	0.00215754	0.0321001
ENO4	-0.556486	-2.30875	0.0270365	0.328416	-0.259789	-1.05279	0.299713	0.904043	-0.647953	-2.46963	0.0185932	0.109546	-0.119912	-0.466222	0.64397	0.999971	-0.424868	-1.74695	0.0894932	0.237937	-0.15886	-0.60905	0.546458	0.707691
ENPP2	-0.35561	-0.712243	0.481076	0.696606	0.304058	0.594852	0.555801	0.940132	1.43423	2.639	0.0123672	0.0929102	0.224747	0.421846	0.675739	0.999971	1.00496	1.99482	0.0539636	0.184759	2.27054	4.20243	0.000175294	0.00897279
EOMES	0.333366	1.24856	0.220183	0.500799	0.431866	1.57993	0.123197	0.830605	0.75573	2.6003	0.0135909	0.0960357	0.319757	1.12232	0.269434	0.999971	0.884197	3.28202	0.00235487	0.0710007	0.815286	2.82174	0.00784997	0.0646767
EPB41L2	0.227577	1.43124	0.161305	0.451711	0.337897	2.07572	0.0453958	0.746376	0.574011	3.31644	0.00214562	0.0494605	0.145728	0.858887	0.396297	0.999971	0.516522	3.21942	0.00278638	0.0723179	0.813689	4.72891	3.69162e-05	0.0050867
EPCAM	-0.389119	-1.3077	0.199572	0.483117	-0.559402	-1.83632	0.0748897	0.789875	-0.485664	-1.49944	0.142804	0.298717	0.255759	0.805496	0.426019	0.999971	-0.267133	-0.889725	0.37974	0.552158	-0.418888	-1.30089	0.201868	0.394689
EPHA6	-0.327204	-1.14307	0.260836	0.53374	-0.158692	-0.541508	0.591617	0.944589	-0.405023	-1.29987	0.202215	0.367027	0.0286611	0.093832	0.925782	0.999971	-0.506987	-1.7553	0.0880333	0.235974	-0.435822	-1.40695	0.168336	0.356167
EPSTI1	0.281976	0.682027	0.499749	0.709718	0.536988	1.26868	0.213	0.874674	1.81838	4.04056	0.000280672	0.0316065	0.378021	0.856864	0.397399	0.999971	1.03706	2.48598	0.0178865	0.115479	1.80807	4.04131	0.00028006	0.0110684
EPYC	-0.622763	-1.87331	0.0694675	0.374182	-0.167108	-0.491004	0.626515	0.948958	-0.250793	-0.693058	0.492886	0.640355	0.134196	0.378297	0.707514	0.999971	-0.146503	-0.436755	0.664995	0.784394	-0.470769	-1.30862	0.199265	0.391644
EREG	0.98511	1.8518	0.0725778	0.376151	1.90022	3.4891	0.00133785	0.456659	1.92254	3.32012	0.00212437	0.049343	1.01431	1.78684	0.0827016	0.999971	1.5532	2.89361	0.00653941	0.0867005	1.80209	3.13043	0.00353114	0.0416896
ERICH2	-1.0933	-2.84751	0.007354	0.300887	-0.57893	-1.47283	0.14981	0.849553	-0.885677	-2.11919	0.0413053	0.155258	0.170559	0.416301	0.679753	0.999971	-0.60958	-1.57348	0.124682	0.285138	-0.262192	-0.63105	0.532142	0.69704
ERICH3-AS1	-0.82526	-3.04574	0.00441242	0.287586	-0.388874	-1.40188	0.169834	0.860661	-0.778968	-2.64112	0.0123031	0.0926855	0.093377	0.322959	0.748664	0.999971	-0.0631642	-0.231034	0.818645	0.890883	-0.1098	-0.374475	0.71033	0.824952
ERO1B	0.425473	1.95169	0.0590833	0.364967	0.193314	0.866165	0.392349	0.918233	0.431742	1.81941	0.0774863	0.213016	0.0769056	0.3306	0.742935	0.999971	0.407575	1.85289	0.0724184	0.213217	0.402673	1.7069	0.0967757	0.262295
ERVFRD-3	-0.487807	-1.42093	0.164262	0.453876	-0.132852	-0.377999	0.707734	0.961128	-0.0575115	-0.153903	0.878578	0.925971	-0.29321	-0.800403	0.428923	0.999971	-0.744361	-2.14887	0.0387031	0.158763	-0.804176	-2.16467	0.0373777	0.15483
ERVH-1	-0.621801	-2.23477	0.0319724	0.335735	-0.107883	-0.378732	0.707194	0.961128	-0.615761	-2.03311	0.0497466	0.169182	0.304326	1.02501	0.312452	0.999971	-0.680064	-2.42234	0.0207845	0.122557	-0.125895	-0.418125	0.678432	0.803839
ERVK-28	-0.898203	-2.38214	0.0228284	0.321455	-0.70192	-1.81836	0.0776495	0.796825	-0.700417	-1.70655	0.0968418	0.239803	0.0121805	0.0302738	0.976022	0.999971	-0.0176214	-0.0463168	0.963323	0.979699	-0.237946	-0.583163	0.563555	0.72174
ETNPPL	-0.497883	-2.18105	0.0360468	0.34213	-0.181443	-0.776383	0.442783	0.922867	-0.648388	-2.6094	0.0132936	0.095448	-0.394651	-1.62016	0.114252	0.999971	-0.64912	-2.81816	0.00792113	0.0904215	-0.633228	-2.56339	0.014861	0.0928068
ETV3	0.341617	1.7746	0.0847377	0.388282	0.240532	1.22048	0.23051	0.881361	0.614061	2.93049	0.00594942	0.0700876	0.195972	0.954028	0.346668	0.999971	0.541632	2.78849	0.00853596	0.0915424	0.70712	3.39447	0.00173515	0.0284359
ETV6	0.502085	2.15553	0.0381397	0.342855	0.598329	2.50908	0.0169291	0.651901	1.03544	4.08382	0.000247605	0.0316065	0.215783	0.86816	0.391271	0.999971	0.908508	3.86552	0.000464293	0.0594383	1.10359	4.37827	0.000104608	0.00732027
EVA1A	-0.52343	-1.81782	0.0777338	0.382138	-0.180451	-0.612139	0.544436	0.938161	-0.62936	-2.00798	0.0524808	0.173952	-0.0226674	-0.0737735	0.941614	0.999971	-0.437521	-1.50589	0.141144	0.305583	-0.39072	-1.25394	0.218247	0.413649
EVL	0.564694	2.88384	0.00670469	0.299905	0.355701	1.77435	0.084779	0.805527	0.596058	2.79649	0.00836596	0.0797483	0.158355	0.757869	0.453645	0.999971	0.600764	3.04063	0.00447167	0.0790873	0.561586	2.65027	0.0120303	0.0823789
EXO5	0.387999	2.60501	0.0134361	0.311238	0.193404	1.26836	0.213111	0.874674	0.501694	3.09447	0.00388274	0.0601058	0.258235	1.6248	0.113254	0.999971	0.518519	3.45022	0.00148916	0.0668385	0.654576	4.06122	0.000264375	0.0108522
EXOG	0.417612	3.67645	0.000793592	0.237871	0.216109	1.85835	0.0716187	0.789875	0.309441	2.50265	0.0171907	0.105591	-0.0357551	-0.294986	0.769763	0.999971	0.255661	2.23061	0.0322727	0.146841	0.146701	1.19345	0.240787	0.438191
EXOSC4	0.0776789	0.284976	0.777356	0.885557	0.358312	1.284	0.207649	0.873737	0.787738	2.65494	0.0118934	0.0917529	0.42781	1.47083	0.150347	0.999971	0.77982	2.83533	0.0075847	0.0895542	1.26953	4.30393	0.000130197	0.00798711
EXOSC8	0.299057	1.45213	0.155447	0.446477	0.0874927	0.414976	0.680714	0.957195	0.420911	1.87763	0.0688577	0.199814	0.130992	0.596078	0.554992	0.999971	0.51498	2.47825	0.0182174	0.116351	0.432336	1.93995	0.0605471	0.201721
EXOSC9	0.394152	1.82343	0.0768624	0.381233	0.165124	0.746162	0.460595	0.924313	0.558799	2.37491	0.0232151	0.120397	0.109997	0.476882	0.636436	0.999971	0.399328	1.83087	0.0757187	0.218211	0.466505	1.99433	0.0540192	0.189165
EYA1	-0.677692	-2.56707	0.0147295	0.314443	-0.50126	-1.85467	0.0721559	0.789875	-0.616409	-2.14507	0.0390277	0.15125	-0.406922	-1.44452	0.157562	0.999971	-0.69464	-2.60777	0.0133464	0.104098	-0.518757	-1.81588	0.0780371	0.232322
EYA2	-0.436982	-1.70778	0.0966101	0.398067	-0.298103	-1.13798	0.262926	0.888798	-0.383746	-1.37778	0.177092	0.339184	-0.00128347	-0.00470066	0.996276	0.999971	-0.40728	-1.57748	0.123758	0.283982	-0.397359	-1.43506	0.160223	0.346239
EYA3	0.335206	1.54806	0.13068	0.427722	0.397532	1.79328	0.0816481	0.799758	0.815578	3.46027	0.00144857	0.0441181	0.335157	1.45055	0.155886	0.999971	0.778985	3.5654	0.00108277	0.0646282	0.96717	4.12759	0.000218041	0.0100135
EZH2	0.0993417	0.567252	0.574195	0.760401	0.185231	1.03313	0.308688	0.906095	0.268792	1.41003	0.167433	0.328445	0.0425321	0.227598	0.821295	0.999971	0.26899	1.52224	0.13701	0.300399	0.319421	1.68549	0.100868	0.268241
F13A1	-2.04573	-3.37924	0.00180884	0.252013	-3.4586	-5.58045	2.83502e-06	0.060549	-2.27783	-3.45668	0.00146292	0.044161	-2.20313	-3.41049	0.00166071	0.806333	-1.99844	-3.27163	0.00242179	0.0710007	-1.16535	-1.77887	0.0840224	0.242741
F3	0.780675	1.09425	0.281385	0.548803	1.95366	2.67481	0.0113263	0.612744	2.91492	3.75351	0.000638494	0.0355888	1.35173	1.77558	0.0845731	0.999971	2.03273	2.82376	0.0078099	0.0901622	2.90512	3.76294	0.000621682	0.0165866
FABP3P2	-1.51167	-3.21274	0.00283666	0.26734	-0.544875	-1.13114	0.265755	0.889772	-1.03134	-2.01366	0.0518509	0.172963	0.107362	0.213834	0.831928	0.999971	-0.604818	-1.27393	0.211153	0.385642	-0.812719	-1.59616	0.119521	0.294028
FABP5	0.581046	1.56427	0.126828	0.424932	0.774873	2.03766	0.0492655	0.757725	1.57013	3.88333	0.000441242	0.0339501	0.567539	1.43187	0.161126	0.999971	1.33446	3.56049	0.00109767	0.0648976	1.71034	4.25503	0.000150287	0.00838058
FADS1	0.295432	0.9295	0.359051	0.607899	0.66569	2.0458	0.0484142	0.757725	1.27777	3.69329	0.000756873	0.0369906	0.609963	1.79847	0.080807	0.999971	1.15605	3.60471	0.000970357	0.063088	1.58812	4.61736	5.14966e-05	0.00573687
FAH	-0.055574	-0.30033	0.765717	0.878292	-0.656764	-3.46685	0.00142253	0.456659	-0.640523	-3.18001	0.00309555	0.055501	-0.420629	-2.13026	0.0403173	0.999971	-0.378889	-2.02928	0.0501549	0.178128	-0.559996	-2.7966	0.00836366	0.0667515
FAM104B	0.272709	1.42702	0.162509	0.452566	0.090018	0.460108	0.648309	0.951993	0.546624	2.62777	0.0127114	0.0938596	0.444008	2.17735	0.0363435	0.999971	0.38769	2.01057	0.0521927	0.181568	0.558707	2.70168	0.0105994	0.0768157
FAM110D	-0.400631	-1.48339	0.146998	0.440558	-0.259976	-0.940244	0.353592	0.91346	-0.183431	-0.62395	0.536741	0.675977	-0.301717	-1.04692	0.302372	0.999971	-0.41766	-1.53263	0.134435	0.297272	-0.649553	-2.2225	0.0328651	0.144164
FAM111A	0.414255	1.91593	0.0636423	0.369416	0.225705	1.01965	0.314951	0.907856	0.517376	2.19829	0.0346916	0.14341	0.20847	0.903568	0.372455	0.999971	0.640491	2.9358	0.0058687	0.0838481	0.613305	2.62123	0.0129159	0.0859751
FAM111B	-0.00682304	-0.0278441	0.977946	0.989411	0.293351	1.16934	0.250236	0.887554	0.50964	1.91067	0.0643375	0.193345	0.0685469	0.262149	0.794756	0.999971	0.553688	2.23935	0.0316445	0.145359	0.81261	3.06446	0.0042013	0.0459613
FAM118A	0.262589	1.52566	0.136158	0.432438	0.170512	0.967688	0.339897	0.911019	0.491028	2.62092	0.0129256	0.0944291	0.200166	1.08988	0.283278	0.999971	0.551724	3.17692	0.0031212	0.0737402	0.570078	3.06078	0.00424204	0.0462463
FAM124B	-0.58806	-2.39738	0.022033	0.321141	-0.405434	-1.61449	0.11548	0.826609	-0.795241	-2.97839	0.00525776	0.0670404	0.0739527	0.282537	0.77921	0.999971	-0.260673	-1.05321	0.299525	0.477093	-0.247812	-0.933588	0.356967	0.551319
FAM129A	0.514299	1.57994	0.123193	0.420775	0.656992	1.97144	0.0566887	0.772503	0.95553	2.69673	0.0107299	0.0880722	0.245637	0.707174	0.484181	0.999971	0.655451	1.99558	0.0538772	0.184588	0.632106	1.79446	0.0814565	0.238349
FAM129B	0.55437	1.14951	0.258207	0.531009	1.0581	2.14307	0.0391997	0.735106	1.96809	3.74908	0.000646569	0.0355888	1.06984	2.07893	0.0450821	0.999971	1.78812	3.67461	0.000797714	0.0618063	2.52581	4.83983	2.64844e-05	0.00466394
FAM129C	0.044029	0.179383	0.85868	0.929266	0.189984	0.756064	0.454713	0.923659	0.515119	1.92805	0.0620639	0.189918	-0.0533763	-0.203797	0.839703	0.999971	0.369213	1.49081	0.145045	0.310525	0.70045	2.63717	0.0124227	0.0841252
FAM131A	0.398632	2.49399	0.0175488	0.31562	0.315735	1.9295	0.0618775	0.778214	0.339381	1.95064	0.0592124	0.184955	0.332361	1.94868	0.0594558	0.999971	0.314183	1.94809	0.0595288	0.193775	0.356258	2.05971	0.0469899	0.175898
FAM157A	-0.62594	-2.39849	0.0219762	0.321141	-0.405307	-1.51701	0.138323	0.842565	-0.732053	-2.577	0.0143804	0.0980149	0.147116	0.528289	0.600661	0.999971	-0.41971	-1.59389	0.12003	0.279863	-0.305268	-1.08095	0.287176	0.484394
FAM160A1	-0.358881	-1.96073	0.0579759	0.363775	-0.047534	-0.253671	0.801246	0.976434	-0.574605	-2.88406	0.0067008	0.0732032	-0.12237	-0.62654	0.535061	0.999971	-0.446906	-2.41985	0.0209061	0.122807	-0.335052	-1.6916	0.0996852	0.266428
FAM160A2	0.230136	1.52601	0.13607	0.432438	0.176398	1.14253	0.261056	0.888798	0.445557	2.71422	0.010275	0.0865161	0.180843	1.12378	0.268819	0.999971	0.572671	3.76342	0.000620825	0.060598	0.674848	4.13522	0.000213255	0.00995652
FAM174A	0.512844	2.30906	0.0270174	0.328416	0.27439	1.20675	0.235692	0.882548	0.409189	1.69255	0.0995031	0.24329	0.154833	0.653311	0.517861	0.999971	0.366539	1.63558	0.110967	0.267387	0.371547	1.5459	0.131201	0.309218
FAM177B	-0.172892	-0.748883	0.458974	0.680638	-0.292708	-1.23843	0.22387	0.880026	-0.492719	-1.96067	0.0579836	0.18268	-0.61683	-2.50386	0.0171413	0.999971	-0.790919	-3.39526	0.00173138	0.0669683	-0.597247	-2.39061	0.0223831	0.116839
FAM181A-AS1	-0.417017	-1.16932	0.250244	0.524672	-0.25222	-0.69081	0.49428	0.930893	-0.749212	-1.92998	0.0618163	0.18954	-0.487216	-1.28029	0.208936	0.999971	-0.996412	-2.76899	0.00896375	0.0927721	-0.961337	-2.49099	0.0176744	0.102018
FAM19A1	-0.197734	-0.806048	0.425705	0.657601	0.083739	0.333431	0.740815	0.966345	-0.120878	-0.452683	0.653595	0.768246	-0.232415	-0.887872	0.380723	0.999971	0.00787177	0.0318021	0.974812	0.985942	0.266172	1.00267	0.322959	0.519633
FAM201A	-0.326017	-1.58348	0.122384	0.420425	-0.517804	-2.45662	0.0191743	0.657326	-0.712633	-3.17985	0.00309693	0.055501	-0.101578	-0.462358	0.64671	0.999971	-0.294671	-1.41845	0.164979	0.334395	-0.43179	-1.93804	0.060789	0.202289
FAM204CP	-0.123156	-0.369779	0.713794	0.847242	-0.360419	-1.05704	0.297797	0.904043	-0.125686	-0.346689	0.730918	0.82576	-0.14065	-0.395759	0.694705	0.999971	-0.458266	-1.36366	0.181456	0.352875	0.0854092	0.236978	0.814068	0.891956
FAM208B	0.375658	1.84736	0.0732349	0.37694	0.183936	0.883537	0.383026	0.918131	0.451489	2.03973	0.0490474	0.167793	0.123749	0.570305	0.572145	0.999971	0.527454	2.57067	0.0146022	0.10705	0.568576	2.58383	0.0141446	0.090515
FAM20A	0.228888	1.5328	0.134392	0.430489	0.136858	0.895219	0.376838	0.916563	0.257771	1.58586	0.121844	0.272518	0.0245536	0.154093	0.878429	0.999971	0.0500843	0.332404	0.741584	0.839275	0.09116	0.564135	0.57629	0.730908
FAM213A	0.523385	2.1901	0.0353294	0.340119	0.538395	2.20061	0.0345127	0.728972	0.898047	3.45231	0.00148065	0.0442879	0.390952	1.53311	0.134317	0.999971	0.483786	2.00632	0.0526659	0.182493	0.814344	3.14897	0.00336183	0.0405737
FAM214B	0.468651	2.55204	0.0152731	0.314443	0.338678	1.80145	0.0803262	0.797938	0.522146	2.61214	0.013205	0.0952732	0.388391	1.98204	0.0554384	0.999971	0.596004	3.21654	0.00280791	0.0723498	0.768732	3.86839	0.000460511	0.0143787
FAM225A	0.708749	1.98226	0.0554125	0.361271	1.02738	2.80673	0.00815294	0.59821	1.01766	2.6148	0.0131197	0.095049	0.688565	1.80476	0.0797959	0.999971	0.910905	2.52491	0.0163008	0.111503	0.940462	2.43068	0.0203816	0.110581
FAM46C	0.214109	0.959702	0.343844	0.596829	0.118448	0.518595	0.607335	0.946897	0.825978	3.40125	0.00170328	0.0463749	0.236347	0.992793	0.327684	0.999971	0.668468	2.96952	0.00537987	0.0828581	0.902219	3.73707	0.000668902	0.0172433
FAM69A	0.496852	2.39991	0.0219035	0.321141	0.161203	0.760571	0.45205	0.923416	0.411778	1.82725	0.0762729	0.211174	-0.0782387	-0.354157	0.725364	0.999971	0.2114	1.01199	0.318548	0.4953	0.106656	0.476068	0.637009	0.774129
FAM71C	-0.829947	-2.52101	0.0164533	0.31562	-0.575449	-1.70738	0.0966852	0.811733	-1.23109	-3.43544	0.00155089	0.0448822	-0.473893	-1.349	0.186075	0.999971	-1.29374	-3.8947	0.000427121	0.0593092	-0.998664	-2.80325	0.00822476	0.0661723
FAM71F2	-0.870351	-2.11269	0.0418954	0.346339	-0.547931	-1.29917	0.202452	0.871008	-0.379335	-0.845924	0.403391	0.56428	-0.308423	-0.701608	0.487603	0.999971	-0.786667	-1.8925	0.0667907	0.205323	-0.490178	-1.09954	0.2791	0.476699
FAM83G	0.371582	1.76223	0.086838	0.390122	0.483477	2.23966	0.0316228	0.720089	0.374098	1.6299	0.112169	0.26046	0.171191	0.760842	0.451891	0.999971	0.507699	2.38626	0.0226112	0.126418	0.503068	2.20471	0.0341985	0.14749
FAM91A3P	-0.0415048	-0.0705294	0.944177	0.973157	-0.286706	-0.475891	0.637134	0.949923	-0.893182	-1.39437	0.172068	0.333692	-0.480822	-0.765707	0.449028	0.999971	-0.399993	-0.673639	0.505003	0.658401	-0.54385	-0.854021	0.398951	0.589436
FANCI	0.184474	1.20572	0.236083	0.513086	0.233063	1.48793	0.145801	0.846209	0.32841	1.97194	0.0566294	0.180276	0.0437327	0.267869	0.790386	0.999971	0.215951	1.39884	0.170735	0.341046	0.261059	1.57676	0.123925	0.299623
FAR1	0.43027	1.63286	0.111541	0.410951	0.311673	1.15533	0.255849	0.888798	0.847777	2.95567	0.00557575	0.0686562	0.324122	1.15271	0.256906	0.999971	0.902518	3.39443	0.00173534	0.0669683	0.973279	3.4132	0.00164843	0.0277761
FAR2	0.53415	2.72792	0.00993114	0.300887	0.46499	2.31959	0.0263738	0.706108	0.372982	1.74995	0.0889667	0.229644	0.268859	1.28677	0.206693	0.999971	0.403359	2.04157	0.0488553	0.175913	0.26596	1.25517	0.217804	0.41314
FARP2	0.270957	1.78998	0.0821872	0.386432	0.198866	1.28323	0.207915	0.873737	0.510631	3.099	0.00383664	0.0598366	0.0811977	0.502687	0.61836	0.999971	0.392297	2.56842	0.0146819	0.10733	0.436446	2.66437	0.011621	0.0809617
FAS	0.280518	0.921582	0.36311	0.610399	0.437031	1.40244	0.169666	0.860477	1.07677	3.24986	0.00256788	0.052679	0.225827	0.695274	0.491514	0.999971	0.754604	2.45695	0.0191592	0.118641	0.980766	2.97753	0.00526941	0.0519462
FASLG	0.491084	2.01092	0.0521537	0.359042	0.746493	2.98582	0.00515743	0.54337	1.23214	4.6352	4.88312e-05	0.0306739	0.28998	1.11279	0.273447	0.999971	0.847804	3.44063	0.00152895	0.0668385	1.26469	4.78566	3.11515e-05	0.00485633
FAT2	-0.371205	-1.67431	0.10306	0.403273	-0.248124	-1.09318	0.281847	0.897457	-0.616836	-2.556	0.0151283	0.100075	-0.27698	-1.17079	0.249662	0.999971	-0.520431	-2.32643	0.0259632	0.133972	-0.652098	-2.71803	0.0101784	0.0749343
FAXC	-0.537688	-2.52258	0.0163919	0.31562	-0.357774	-1.63954	0.110137	0.823063	-0.502884	-2.16745	0.0371488	0.148334	-0.00180608	-0.00794068	0.99371	0.999971	-0.502335	-2.33567	0.0254179	0.132909	-0.510554	-2.21347	0.033536	0.14582
FBP1	0.522475	0.899734	0.374463	0.618092	1.17408	1.97491	0.0562774	0.771502	2.30762	3.65073	0.000853053	0.0385589	0.886268	1.43028	0.161581	0.999971	2.16217	3.69012	0.000763651	0.0613147	3.06633	4.87961	2.3505e-05	0.00458455
FBRS	0.440163	2.47539	0.0183414	0.316803	0.289565	1.59065	0.120758	0.828948	0.49087	2.53609	0.0158698	0.102075	0.263289	1.38762	0.174101	0.999971	0.591709	3.29793	0.00225586	0.0696237	0.559011	2.90515	0.0063492	0.0577402
FBXL5	0.343885	1.4588	0.153612	0.445741	0.238686	0.98903	0.329495	0.909039	0.757574	2.9524	0.00562299	0.0688212	0.231598	0.920714	0.363557	0.999971	0.692796	2.91267	0.0062279	0.0856487	0.919497	3.60455	0.000970793	0.0209115
FBXO18	0.291341	1.72119	0.0941225	0.395869	0.230909	1.33249	0.191382	0.868461	0.520779	2.82649	0.00775629	0.0773181	0.161841	0.896025	0.376413	0.999971	0.413864	2.42318	0.0207433	0.122455	0.579944	3.16614	0.00321202	0.0394797
FBXO24	-0.353545	-1.67355	0.103211	0.403273	-0.49414	-2.28477	0.0285554	0.706728	-0.711693	-3.09495	0.0038778	0.0601058	-0.24674	-1.09456	0.281248	0.999971	-0.585434	-2.74647	0.00948279	0.0937744	-0.6721	-2.93999	0.00580582	0.0550979
FBXO30	0.437631	2.16091	0.0376899	0.342667	0.175348	0.845721	0.403502	0.919887	0.435964	1.97763	0.0559557	0.179265	0.165302	0.764912	0.449495	0.999971	0.628986	3.07802	0.00405435	0.0776898	0.634819	2.89664	0.00648889	0.0584629
FBXW5	0.266775	1.13617	0.263673	0.535837	0.366543	1.52482	0.136366	0.841989	0.769543	3.0109	0.00483219	0.0652521	0.272812	1.08885	0.283726	0.999971	0.751578	3.17229	0.00315984	0.0740388	0.91178	3.58842	0.0010155	0.0215057
FCAR	0.223632	0.569221	0.572872	0.759727	1.12743	2.80308	0.0082283	0.59821	1.77121	4.14176	0.000209234	0.0316065	0.743083	1.77251	0.0850887	0.999971	1.10179	2.77937	0.00873355	0.0919259	1.49965	3.52739	0.00120336	0.023557
FCER2	0.299442	0.91603	0.365973	0.612609	0.512671	1.53191	0.134611	0.840578	0.662333	1.8614	0.0711757	0.20326	0.625573	1.79342	0.0816257	0.999971	1.11206	3.37153	0.00184727	0.0669683	1.41424	3.99794	0.000317447	0.0118094
FCGBP	0.333556	1.14312	0.260812	0.53374	0.642117	2.1495	0.0386494	0.735106	0.988068	3.11085	0.00371863	0.0593015	0.419531	1.3474	0.186585	0.999971	0.952158	3.23398	0.00267978	0.071319	1.21254	3.84008	0.00049927	0.0148719
FCGR1B	0.00841909	0.0253315	0.979936	0.990401	0.428651	1.25979	0.216151	0.876209	0.813846	2.2496	0.0309226	0.136129	0.593339	1.67304	0.103313	0.999971	0.72442	2.16018	0.0377504	0.157257	1.15009	3.19776	0.00295252	0.0378388
FCHSD2	0.447137	2.14274	0.0392282	0.343438	0.43392	2.03113	0.0499575	0.757725	0.87704	3.86114	0.00047014	0.0345094	0.103526	0.464929	0.644886	0.999971	0.649987	3.087	0.00395978	0.0773534	0.808942	3.58232	0.00103294	0.0216816
FCRL1	0.182877	0.667976	0.508568	0.7161	0.347501	1.23981	0.223363	0.879701	0.933178	3.13136	0.0035224	0.0582841	0.264269	0.904595	0.371918	0.999971	0.760178	2.75182	0.00935704	0.09351	1.16737	3.94028	0.000374767	0.013036
FCRL2	-0.0228172	-0.110965	0.912283	0.957308	0.298043	1.4158	0.165747	0.857085	0.32503	1.45216	0.155439	0.31412	0.00871502	0.0397191	0.968545	0.999971	0.333568	1.60773	0.116957	0.275516	0.729076	3.27654	0.00238998	0.0339276
FCRL3	0.286749	0.94206	0.352674	0.603465	0.630526	2.02339	0.0507892	0.76158	0.860331	2.59663	0.0137126	0.0964323	0.705805	2.17304	0.0366922	0.999971	1.32257	4.30623	0.000129318	0.0552022	1.50525	4.56988	5.93114e-05	0.00593323
FCRL6	0.272844	1.10196	0.278064	0.546318	0.39507	1.55856	0.128175	0.834882	0.805352	2.98816	0.00512621	0.0665919	0.120512	0.45613	0.651138	0.999971	0.540334	2.1628	0.0375325	0.156784	0.919341	3.43119	0.00156908	0.0271264
FDFT1	0.369133	1.92338	0.0626684	0.368356	0.236829	1.20536	0.236221	0.882548	0.555301	2.65814	0.0118004	0.0915299	0.148373	0.724508	0.473611	0.999971	0.609836	3.14918	0.00336001	0.0744585	0.661688	3.18604	0.00304621	0.0384792
FDX1	0.358541	1.43513	0.160203	0.45077	0.36654	1.43308	0.160783	0.856068	1.03667	3.81207	0.000540725	0.0346387	0.348746	1.30818	0.199412	0.999971	0.828671	3.28728	0.00232169	0.0704839	1.0211	3.77691	0.000597531	0.0162223
FEN1	0.330764	1.31573	0.19689	0.480689	0.273091	1.0611	0.295975	0.904043	0.92684	3.38705	0.00177068	0.0466881	-0.0174246	-0.064956	0.948582	0.999971	0.573729	2.26183	0.0300805	0.142291	0.787004	2.89297	0.00655012	0.0587297
FETUB	-0.304217	-1.20568	0.236096	0.513086	-0.347702	-1.34603	0.18702	0.866706	-0.735411	-2.67761	0.0112484	0.0896072	-0.133977	-0.497608	0.621899	0.999971	-0.594503	-2.33511	0.0254504	0.132964	-0.404479	-1.48137	0.147531	0.330647
FEZ1	0.495929	2.48556	0.0179041	0.316203	0.791978	3.87719	0.000449066	0.424192	0.704837	3.24535	0.00259923	0.0528417	0.873954	4.10487	0.000232926	0.62184	0.830133	4.1234	0.000220712	0.0593092	0.892546	4.13383	0.000214116	0.00995652
FFAR2	0.302593	0.820803	0.417361	0.651981	1.01343	2.68518	0.0110404	0.609088	1.43322	3.57158	0.00106432	0.0401488	1.07469	2.73192	0.00983297	0.999971	1.43121	3.84756	0.000488722	0.0603346	2.25459	5.65151	2.28648e-06	0.00335464
FGF14	-0.564283	-2.26136	0.0301121	0.333153	-0.427758	-1.67444	0.103035	0.81513	-0.533276	-1.96333	0.0576618	0.182071	-0.484237	-1.8186	0.0776115	0.999971	-0.730186	-2.90008	0.00643207	0.0863845	-0.848538	-3.14241	0.00342088	0.0409537
FGF14-IT1	-0.891702	-2.90197	0.00640101	0.299868	-0.737213	-2.3435	0.0249638	0.69969	-0.861122	-2.57457	0.0144651	0.098185	-0.116542	-0.355437	0.724414	0.999971	-0.545731	-1.76017	0.0871918	0.234865	-0.383141	-1.15226	0.257092	0.454539
FGF23	-0.668495	-2.56842	0.0146817	0.314443	-0.0729638	-0.273826	0.785842	0.973407	-0.65625	-2.31635	0.0265702	0.12735	-0.283357	-1.02025	0.314669	0.999971	-0.707818	-2.69521	0.0107702	0.0975128	-0.600853	-2.13331	0.0400491	0.160629
FGR	0.655746	2.08905	0.0441049	0.349152	0.772422	2.40362	0.0217145	0.678604	1.0986	3.21529	0.00281731	0.0541591	0.67	2.0003	0.0533418	0.999971	1.31762	4.16013	0.000198325	0.0593092	1.43753	4.23203	0.000160761	0.00863759
FHL3	0.418631	1.80892	0.0791351	0.382953	0.635928	2.68407	0.0110708	0.609088	1.11727	4.4352	8.84205e-05	0.0312363	0.680219	2.7545	0.00929471	0.999971	0.902016	3.86282	0.000467896	0.0594827	1.29854	5.18513	9.36787e-06	0.00404174
FHOD3	-0.272466	-1.19493	0.240216	0.516429	-0.276678	-1.18523	0.243978	0.88601	-0.596409	-2.40294	0.0217494	0.117205	-0.0252085	-0.103606	0.918079	0.999971	-0.539259	-2.34386	0.0249432	0.13183	-0.324004	-1.3131	0.197766	0.389862
FKBP1BP1	-1.66772	-3.17274	0.00315607	0.273985	-1.55845	-2.89603	0.00649904	0.566544	-1.12294	-1.96262	0.0577479	0.182273	-0.506524	-0.903066	0.372717	0.999971	0.0195527	0.0368657	0.970803	0.983648	-0.431024	-0.75776	0.45371	0.634731
FKBP5	0.0398149	0.120509	0.904775	0.954117	-0.955769	-2.82569	0.00777191	0.590192	-1.24557	-3.46345	0.00143594	0.0440693	-1.04801	-2.97267	0.00533616	0.986651	-1.01782	-3.05315	0.00432763	0.078695	-1.65718	-4.63511	4.88444e-05	0.00569374
FLG-AS1	-0.571502	-2.4024	0.0217768	0.321141	-0.319124	-1.31034	0.198687	0.870115	-0.772547	-2.98345	0.00518926	0.066726	0.0667057	0.262782	0.794272	0.999971	-0.364342	-1.51788	0.138102	0.301877	-0.246284	-0.956709	0.345332	0.540859
FLJ36000	-0.508134	-1.79725	0.0810033	0.384391	-0.333398	-1.15184	0.257261	0.888798	-0.76305	-2.47942	0.0181669	0.108319	-0.071208	-0.236029	0.814798	0.999971	-0.392131	-1.37456	0.17808	0.349235	-0.456025	-1.49052	0.145123	0.327739
FLJ42102	-0.631568	-2.27557	0.0291587	0.332149	-0.522714	-1.83964	0.0743894	0.789875	-0.829116	-2.74443	0.00953124	0.083961	-0.225649	-0.761921	0.451255	0.999971	-0.755769	-2.69874	0.0106765	0.0973958	-0.548171	-1.82517	0.0765935	0.230535
FLNA	0.432323	1.61563	0.115232	0.41435	0.524308	1.91389	0.0639102	0.782977	1.25082	4.29434	0.000133918	0.0313171	0.401155	1.40492	0.168934	0.999971	1.10337	4.08656	0.00024565	0.0593092	1.46768	5.06852	1.33163e-05	0.00412098
FLT1P1	-0.989696	-2.73906	0.00965973	0.300887	-0.497983	-1.34621	0.186964	0.866706	-0.706542	-1.79641	0.0811399	0.218296	-0.381235	-0.988779	0.329616	0.999971	-0.411915	-1.12982	0.266301	0.442471	0.0255533	0.0653526	0.948268	0.973109
FLVCR2	0.106354	0.407717	0.685986	0.830977	0.442063	1.65534	0.106873	0.81971	0.493736	1.73887	0.0909237	0.232047	0.534664	1.92084	0.0629979	0.999971	0.959503	3.64548	0.000865721	0.0618203	1.02259	3.62262	0.000922973	0.0203851
FMNL1	0.535251	2.65199	0.0119797	0.306074	0.39266	1.90034	0.0657226	0.785179	0.679746	3.09406	0.00388689	0.0601058	0.160335	0.744476	0.461601	0.999971	0.756181	3.71316	0.000715639	0.0608829	0.763111	3.49398	0.00131995	0.0248091
FMNL3	0.284155	1.01077	0.319121	0.578847	0.658653	2.28851	0.0283134	0.706108	1.27871	4.17866	0.000187892	0.0316065	0.436819	1.45615	0.15434	0.999971	1.10605	3.8992	0.000421647	0.0593092	1.50199	4.93722	1.977e-05	0.00436697
FMO3	-0.460336	-1.92092	0.0629886	0.368356	-0.498523	-2.03197	0.0498684	0.757725	-0.495834	-1.9008	0.0656603	0.195407	0.243016	0.950331	0.348516	0.999971	-0.58954	-2.43809	0.02003	0.120827	-0.330355	-1.27389	0.21117	0.405053
FNBP4	0.431851	1.9856	0.0550249	0.361271	0.205517	0.923002	0.36238	0.914702	0.377833	1.59597	0.119565	0.269823	0.116269	0.500987	0.619544	0.999971	0.546606	2.49077	0.0176838	0.114963	0.437175	1.8575	0.0717425	0.222564
FNDC3B	0.507787	1.99034	0.0544771	0.36031	0.58906	2.25529	0.0305279	0.715503	1.08036	3.89027	0.000432565	0.0337851	0.456554	1.67704	0.102522	0.999971	0.934215	3.62906	0.000906471	0.0626273	1.26775	4.59195	5.55428e-05	0.00577202
FOLR2	-1.02296	-2.28	0.0288666	0.331477	-2.02373	-4.40581	9.64439e-05	0.286965	-1.31276	-2.688	0.0109638	0.0886634	-1.49179	-3.11593	0.00366907	0.944228	-1.36754	-3.02077	0.00470963	0.0801503	-1.1035	-2.27282	0.029341	0.135124
FOSL2	0.560723	1.96513	0.0574444	0.363182	0.795955	2.72477	0.0100093	0.609088	1.30407	4.19867	0.00017723	0.0316065	0.504359	1.65649	0.106639	0.999971	1.04899	3.64349	0.000870551	0.0618203	1.35852	4.39974	9.81887e-05	0.00715167
FOXRED2	-0.267861	-1.66444	0.10503	0.40536	-0.450319	-2.73324	0.00980074	0.607472	-0.262156	-1.49653	0.143557	0.299617	-0.260901	-1.51929	0.137749	0.999971	-0.150393	-0.92617	0.360754	0.534363	-0.102104	-0.586297	0.561471	0.720044
FRAS1	-0.440966	-1.93087	0.0617016	0.3675	-0.208825	-0.893161	0.377923	0.916563	-0.578591	-2.32749	0.0259003	0.125964	-0.149888	-0.615064	0.542525	0.999971	-0.469369	-2.03688	0.0493475	0.176982	-0.501612	-2.02971	0.0501095	0.181438
FREM1	-0.603645	-2.84726	0.00735864	0.300887	-0.392616	-1.80889	0.0791388	0.797437	-0.660927	-2.86396	0.00705301	0.0743508	-0.0768766	-0.339818	0.736042	0.999971	-0.418391	-1.95583	0.0585738	0.192297	-0.377817	-1.64681	0.108624	0.279629
FRG1	0.495751	1.93897	0.0606716	0.366531	0.489952	1.8718	0.069683	0.785981	0.915338	3.28894	0.00231133	0.0511783	0.313908	1.15058	0.257773	0.999971	0.741931	2.8759	0.00684185	0.0875789	0.863101	3.1195	0.0036346	0.0424534
FRG2B	-0.30489	-0.672678	0.505607	0.714245	0.0457436	0.0985809	0.922038	0.991071	-0.612242	-1.24095	0.222949	0.389127	0.082154	0.169863	0.866104	0.999971	-0.21477	-0.469612	0.64157	0.767294	-0.227434	-0.463698	0.64576	0.780632
FRMPD2	-0.495197	-1.80158	0.0803059	0.383699	-0.305159	-1.08442	0.285653	0.899166	-0.560221	-1.87241	0.0695956	0.200888	0.0484383	0.165147	0.869787	0.999971	-0.342034	-1.23324	0.225775	0.401264	-0.229031	-0.769993	0.446514	0.628679
FRY-AS1	-0.589866	-2.15464	0.0382141	0.342943	-0.349819	-1.24814	0.220336	0.878292	-0.269052	-0.90287	0.37282	0.53637	-0.17976	-0.615349	0.542339	0.999971	-0.132132	-0.478335	0.635412	0.762524	-0.306739	-1.0354	0.307644	0.504866
FSCN1	0.0889794	0.157717	0.875594	0.938756	1.32132	2.28769	0.0283666	0.706108	2.26424	3.68705	0.000770275	0.0372978	0.871389	1.44747	0.156741	0.999971	1.93791	3.4043	0.00168911	0.0669683	2.97444	4.87206	2.40433e-05	0.00461408
FSHR	-0.757931	-2.70104	0.010616	0.301574	-0.521811	-1.81641	0.0779548	0.797148	-1.02053	-3.34114	0.00200658	0.0483151	-0.339835	-1.13495	0.264176	0.999971	-0.241913	-0.854404	0.398741	0.568822	-0.54151	-1.7833	0.0832859	0.241402
FUBP1	0.436508	1.83786	0.0746576	0.378516	0.249923	1.02784	0.311139	0.906174	0.538863	2.08432	0.044559	0.160443	0.185347	0.731326	0.46949	0.999971	0.704398	2.93928	0.00581642	0.0838481	0.69348	2.69818	0.0106914	0.0772992
FUK	0.163678	1.20496	0.236372	0.513229	0.203246	1.46151	0.152872	0.852695	0.367627	2.48632	0.0178721	0.107658	-0.0306039	-0.211137	0.834015	0.999971	0.0336457	0.245479	0.807532	0.883322	0.220421	1.49952	0.142782	0.325017
FUNDC2	0.310867	1.43543	0.160116	0.45077	0.356185	1.60651	0.117225	0.826609	0.824346	3.49691	0.00130929	0.0431531	0.359312	1.55484	0.129058	0.999971	0.580263	2.65544	0.0118788	0.10009	0.917124	3.91339	0.000404844	0.0135583
FUT7	-0.0721699	-0.225656	0.822793	0.909612	0.267177	0.815996	0.420069	0.921976	0.553437	1.58974	0.120964	0.271446	0.0069256	0.0202934	0.983926	0.999971	0.566796	1.75639	0.0878448	0.235736	0.597113	1.7253	0.0933699	0.257329
FXR2	0.35535	2.04162	0.0488499	0.355593	0.186426	1.04622	0.302693	0.905659	0.449562	2.37288	0.0233249	0.120715	0.264187	1.42245	0.163824	0.999971	0.58315	3.32048	0.00212226	0.06908	0.634292	3.36763	0.00186702	0.0298071
G0S2	0.0927228	0.186754	0.852941	0.926139	1.4871	2.92565	0.00602394	0.552973	2.05608	3.80444	0.000552585	0.0348009	1.54524	2.91667	0.00616439	0.999971	2.28126	4.55367	6.22377e-05	0.0533688	3.65762	6.80769	7.0757e-08	0.00113534
GABARAPL1	0.702505	3.11471	0.00368088	0.284505	0.546795	2.36805	0.023587	0.692185	0.787138	3.20617	0.00288688	0.0544256	0.293942	1.22134	0.230189	0.999971	0.743727	3.26803	0.00244542	0.0710007	0.714296	2.92661	0.0060091	0.0560128
GABRB1	-0.57912	-2.52304	0.0163739	0.31562	-0.297621	-1.26654	0.213757	0.874674	-0.875506	-3.50414	0.00128339	0.0428615	-0.440276	-1.79757	0.0809512	0.999971	-0.743561	-3.21051	0.00285356	0.0724145	-0.761159	-3.06442	0.00420178	0.0459613
GADL1	-0.527831	-2.51312	0.0167667	0.31562	-0.235876	-1.09699	0.280201	0.896644	-0.627812	-2.7461	0.00949167	0.0837852	0.2681	1.19625	0.239709	0.999971	-0.211118	-0.996199	0.326049	0.502279	-0.0718604	-0.316174	0.753765	0.85333
GALNT13	-0.304235	-1.01507	0.3171	0.577146	-0.193423	-0.630363	0.532587	0.937211	-0.224092	-0.686876	0.496725	0.643348	0.322983	1.00988	0.319542	0.999971	-0.467159	-1.54473	0.131484	0.29371	-0.144511	-0.445555	0.658686	0.789467
GALNTL6	-0.513207	-2.00584	0.0527196	0.359127	-0.232472	-0.887508	0.380916	0.917955	-0.601167	-2.15857	0.037885	0.149572	-0.208631	-0.764168	0.449932	0.999971	-0.610525	-2.36488	0.0237609	0.129178	-0.70951	-2.56259	0.0148898	0.0929037
GALT	0.34145	1.96045	0.0580101	0.363823	0.283067	1.58751	0.121468	0.829268	0.291123	1.53558	0.13371	0.28767	0.0787286	0.423612	0.674463	0.999971	0.485659	2.76353	0.00908722	0.092916	0.273868	1.45308	0.155187	0.339927
GAPDHP27	-0.299148	-0.890092	0.379546	0.621828	-0.363729	-1.05712	0.297759	0.904043	-0.161737	-0.442105	0.661157	0.774095	-0.436367	-1.21677	0.231904	0.999971	-1.068	-3.14937	0.00335824	0.0744585	-0.837946	-2.304	0.0273314	0.129848
GAPDHP49	0.0928984	0.240327	0.811491	0.904255	0.133286	0.336804	0.738293	0.96571	0.12155	0.28888	0.774392	0.856237	-0.0101672	-0.0246492	0.980476	0.999971	-0.358412	-0.918925	0.364478	0.537909	-0.683784	-1.63467	0.111158	0.282902
GAPT	-0.22121	-0.703158	0.486648	0.70081	0.460297	1.42917	0.161895	0.856068	1.09521	3.19825	0.00294864	0.0547613	0.718474	2.14026	0.0394429	0.999971	1.13699	3.58186	0.00103425	0.0643192	1.92397	5.65151	2.28652e-06	0.00335464
GART	0.275794	1.21522	0.232486	0.510113	0.207424	0.892747	0.378142	0.916563	0.834734	3.37898	0.00181013	0.0470314	0.111201	0.459182	0.648967	0.999971	0.593136	2.59017	0.0139293	0.105607	0.884562	3.60176	0.000978384	0.0210008
GAS5-AS1	0.369572	1.50551	0.141241	0.435844	-0.130216	-0.518141	0.607648	0.946897	0.262467	0.98226	0.332771	0.49838	0.071085	0.271375	0.787711	0.999971	0.294349	1.18837	0.242758	0.41917	0.495772	1.86631	0.0704671	0.219981
GATA4	-0.782383	-2.90444	0.0063606	0.299868	-0.646956	-2.34594	0.0248238	0.698859	-0.809433	-2.76052	0.00915573	0.0823861	-0.112606	-0.391751	0.697638	0.999971	-0.881962	-3.24486	0.00260262	0.0713064	-0.58831	-2.01821	0.0513518	0.183848
GATM-AS1	-0.716049	-2.59525	0.0137584	0.311772	-0.256521	-0.908151	0.370062	0.916323	-0.873287	-2.90778	0.00630653	0.0716826	-0.8016	-2.72271	0.0100607	0.999971	-0.944454	-3.39251	0.00174446	0.0669683	0.111159	0.372306	0.711929	0.826068
GBA2	0.357573	2.17088	0.0368679	0.342292	0.216629	1.28466	0.207421	0.873575	0.379211	2.11505	0.0416805	0.155941	0.252047	1.43403	0.160513	0.999971	0.581008	3.49588	0.00131301	0.0666694	0.447878	2.51275	0.0167817	0.0992624
GBA3	-0.248979	-0.785377	0.437562	0.665924	-0.0645349	-0.198842	0.843547	0.982322	-0.501129	-1.45222	0.155423	0.314103	0.411839	1.21745	0.231649	0.999971	-0.0259904	-0.0812514	0.935709	0.963986	0.108722	0.316921	0.753202	0.853056
GBP1P1	0.358741	0.772187	0.445231	0.670997	0.832299	1.74992	0.0889704	0.80729	1.94254	3.8413	0.000497525	0.0345117	0.843495	1.70149	0.0977952	0.999971	1.24484	2.65557	0.0118749	0.10009	1.86967	3.71898	0.00070398	0.0177245
GBP2	0.359473	1.03792	0.306486	0.569519	0.547956	1.5454	0.13132	0.838365	1.52954	4.05719	0.000267478	0.0316065	0.499143	1.35061	0.185564	0.999971	1.18012	3.37697	0.00182009	0.0669683	1.68589	4.49826	7.33628e-05	0.00644432
GBP3	0.394721	1.59668	0.119406	0.417725	0.312278	1.23386	0.225546	0.880255	0.940639	3.49556	0.00131417	0.0432184	0.305069	1.15646	0.255391	0.999971	0.769766	3.08595	0.00397077	0.0773774	0.94455	3.53077	0.00119213	0.0234663
GBP4	0.211707	0.450095	0.655441	0.812177	0.661907	1.37456	0.178079	0.864313	2.13917	4.17812	0.00018819	0.0316065	0.719721	1.43397	0.160532	0.999971	1.7262	3.63716	0.000886137	0.0620129	2.52189	4.95464	1.87614e-05	0.00433186
GBP5	0.258152	0.507404	0.615081	0.787017	0.562291	1.07954	0.287793	0.900414	2.12901	3.84436	0.000493204	0.0345117	0.495761	0.913184	0.367447	0.999971	1.25848	2.45148	0.0194081	0.119161	2.14644	3.89866	0.000422304	0.013844
GBP6	0.512151	2.30064	0.0275416	0.329216	0.588428	2.58192	0.0142103	0.636779	0.595022	2.45556	0.0192219	0.111112	0.207561	0.873782	0.388244	0.999971	0.139135	0.619428	0.53968	0.687476	0.11797	0.489713	0.627419	0.767635
GCH1	-0.0147284	-0.0359053	0.971564	0.986216	0.304281	0.724566	0.473576	0.927541	1.47757	3.30919	0.0021882	0.0497706	0.610396	1.39451	0.172027	0.999971	1.39485	3.37004	0.00185478	0.0669683	2.03775	4.59063	5.57618e-05	0.00577202
GCLM	0.330755	1.5999	0.118688	0.417009	0.346167	1.63557	0.110969	0.823063	0.544476	2.41953	0.0209216	0.115504	0.0870592	0.394645	0.69552	0.999971	0.519012	2.48809	0.0177971	0.11519	0.328246	1.46724	0.151316	0.335172
GCNT2	0.153085	0.895234	0.37683	0.619564	0.346435	1.9789	0.0558068	0.770717	0.667357	3.58532	0.00102432	0.0395605	0.289925	1.58889	0.121155	0.999971	0.402767	2.33432	0.0254969	0.132995	0.695676	3.75948	0.000627805	0.0166749
GCSAML	0.130613	0.43669	0.665041	0.818069	0.572654	1.87016	0.0699163	0.786664	0.724002	2.2238	0.0327695	0.139647	0.497051	1.55738	0.128454	0.999971	0.789442	2.61584	0.0130866	0.103485	1.48802	4.59741	5.46479e-05	0.00577202
GFI1	0.197371	1.06292	0.29516	0.560506	0.295922	1.55666	0.128625	0.835541	0.517954	2.56257	0.0148904	0.0994751	0.212959	1.07478	0.289889	0.999971	0.445439	2.37743	0.0230795	0.127478	0.290763	1.44702	0.156866	0.3418
GFOD1	0.589368	3.41453	0.00164244	0.249754	0.458837	2.59658	0.0137142	0.633756	0.45467	2.41996	0.0209006	0.115475	0.30972	1.68159	0.101629	0.999971	0.431224	2.476	0.0183149	0.116643	0.220206	1.17894	0.246443	0.443664
GFOD2	0.196508	1.46304	0.152456	0.444697	0.222369	1.61714	0.114903	0.826609	0.184415	1.26136	0.215592	0.38131	0.117208	0.817784	0.419061	0.999971	0.272474	2.0105	0.0522005	0.181568	0.276278	1.90081	0.0656584	0.211206
GFRA2	-0.257083	-1.28506	0.207284	0.490376	-0.644379	-3.14622	0.00338646	0.508184	0.0105239	0.0483272	0.961733	0.977196	-0.665903	-3.11937	0.00363591	0.944228	-0.587769	-2.91178	0.00624218	0.085696	-0.0449096	-0.207446	0.836874	0.905907
GGCX	0.321253	2.05324	0.047648	0.353802	0.210523	1.31429	0.197371	0.869892	0.536154	3.1481	0.00336961	0.0574038	0.119311	0.714624	0.479622	0.999971	0.401651	2.54416	0.0155653	0.109661	0.453006	2.67555	0.0113057	0.079585
GGT5	-0.158998	-0.424509	0.673815	0.823212	0.810245	2.11305	0.0418623	0.735687	0.684784	1.67964	0.10201	0.246662	0.659506	1.65014	0.107938	0.999971	1.28963	3.41243	0.00165193	0.0669683	1.39729	3.44745	0.00150054	0.0264968
GHR	-0.737451	-2.78947	0.00851493	0.300887	-0.478434	-1.7677	0.0859038	0.806978	-0.808333	-2.80896	0.00810719	0.0785614	0.143033	0.507026	0.615344	0.999971	-0.347417	-1.30239	0.20136	0.374906	-0.340555	-1.1904	0.24197	0.439221
GIP	-0.588718	-1.39951	0.170538	0.45933	0.199426	0.46307	0.646205	0.951989	-0.339646	-0.741755	0.463227	0.615754	-0.052892	-0.117832	0.90688	0.999971	-0.899266	-2.11864	0.0413546	0.163516	-0.569794	-1.2517	0.219049	0.414508
GK	0.13521	0.304403	0.762639	0.876311	0.542524	1.19304	0.240945	0.884119	1.55641	3.21907	0.00278898	0.0540434	0.52286	1.10314	0.277558	0.999971	1.41271	3.15207	0.00333433	0.0744585	2.12632	4.42368	9.14835e-05	0.00695324
GK-AS1	0.235462	0.574086	0.569613	0.757442	0.899395	2.14193	0.0392983	0.735106	1.10941	2.48494	0.0179307	0.107738	0.333149	0.761204	0.451677	0.999971	0.890243	2.15113	0.0385106	0.158324	1.1071	2.49437	0.0175331	0.101698
GLCCI1	0.394315	2.26949	0.0295632	0.332702	0.310326	1.74462	0.0899032	0.80729	0.39071	2.06589	0.0463691	0.163447	0.0850475	0.458725	0.649292	0.999971	0.464261	2.64819	0.0120918	0.100585	0.386012	2.05306	0.0476657	0.177043
GLIPR2	0.161807	0.442657	0.660761	0.815051	0.546004	1.45903	0.15355	0.853247	1.75041	4.39923	9.83347e-05	0.0312363	0.626734	1.60679	0.117163	0.999971	1.40628	3.81279	0.000539624	0.060598	2.00505	5.06887	1.33024e-05	0.00412098
GLRA2	-0.887593	-2.52954	0.016121	0.31562	-0.216901	-0.603793	0.549908	0.93952	-0.604399	-1.58241	0.122629	0.273602	0.594474	1.58769	0.121427	0.999971	0.217202	0.613472	0.543565	0.690345	0.0606304	0.159674	0.874063	0.92914
GLRX	0.3867	1.81443	0.0782654	0.38222	0.440046	2.0168	0.0515069	0.762113	0.817542	3.52405	0.00121455	0.0415701	0.344977	1.51692	0.138346	0.999971	0.805555	3.74596	0.00065229	0.0606673	0.983348	4.26373	0.000146503	0.00836269
GLS	0.467359	1.72678	0.0931003	0.395328	0.346877	1.25187	0.218989	0.877578	0.742111	2.51897	0.0165342	0.104045	0.235346	0.81489	0.420693	0.999971	0.718131	2.62962	0.0126539	0.102187	0.836868	2.85733	0.00717287	0.0617222
GLT6D1	-1.44804	-3.62943	0.00090555	0.242953	-1.11619	-2.73271	0.00981368	0.607472	-1.66416	-3.83194	0.000510991	0.034518	-0.529438	-1.24359	0.221985	0.999971	-0.867872	-2.15584	0.0381137	0.157652	-0.841503	-1.94908	0.0594059	0.199585
GNA12	0.350383	1.57967	0.123256	0.420801	0.453751	1.9982	0.0535789	0.765938	0.855016	3.54132	0.00115774	0.0406695	0.318066	1.34384	0.187722	0.999971	0.889254	3.97331	0.000340804	0.0593092	1.0015	4.17244	0.000191334	0.00941273
GNB1	0.415995	1.92422	0.0625587	0.368223	0.302875	1.36845	0.179967	0.864435	0.818422	3.47786	0.00138002	0.0435485	0.293636	1.27286	0.211528	0.999971	0.908573	4.16514	0.000195451	0.0593092	0.977208	4.17706	0.000188771	0.00937602
GNGT1	-0.968481	-2.27076	0.0294784	0.332632	-0.279267	-0.639584	0.526643	0.936754	-0.895518	-1.92895	0.0619481	0.189748	0.257458	0.565709	0.575232	0.999971	-0.00803903	-0.0186804	0.985203	0.991774	0.0836508	0.181245	0.857229	0.91879
GNL2	0.292609	1.55491	0.12904	0.426108	0.267139	1.38662	0.174403	0.863307	0.714141	3.48635	0.00134806	0.0435212	0.194021	0.966219	0.34062	0.999971	0.560119	2.94987	0.00565986	0.0835593	0.788743	3.87322	0.000454193	0.0142969
GNLY	0.497693	1.06977	0.292109	0.557812	0.882834	1.85356	0.0723202	0.789875	1.79161	3.53784	0.00116898	0.0408033	0.860333	1.73301	0.0919733	0.999971	1.58262	3.37138	0.00184805	0.0669683	2.14729	4.26517	0.000145885	0.00836269
GOLGA2	0.367159	2.40995	0.0213961	0.320952	0.260471	1.66998	0.103922	0.815441	0.702848	4.2382	0.000157881	0.0316065	0.22194	1.36519	0.180978	0.999971	0.522282	3.39751	0.00172078	0.0669683	0.636411	3.86018	0.000471435	0.0145186
GOLGA6L4	0.00286304	0.00444565	0.996478	0.998418	0.50973	0.77312	0.444686	0.922867	-0.452516	-0.645519	0.522837	0.665206	0.582915	0.848241	0.402117	0.999971	-0.214038	-0.329384	0.743846	0.84091	-0.51415	-0.73776	0.46562	0.644867
GORAB	0.345381	1.71175	0.095867	0.397794	0.29754	1.44042	0.158712	0.855535	0.551207	2.50972	0.0169034	0.104939	0.215866	1.00262	0.322986	0.999971	0.543979	2.67195	0.0114062	0.0992151	0.690414	3.16206	0.00324698	0.0397065
GPAT3	0.839917	1.69375	0.0992712	0.399925	1.57477	3.10191	0.00380733	0.518205	2.23184	4.1347	0.000213575	0.0316065	1.05945	2.00218	0.0531301	0.999971	1.78069	3.55881	0.00110282	0.0649004	2.43621	4.5399	6.48374e-05	0.00618198
GPAT4	0.334863	1.86135	0.0711827	0.375274	0.281614	1.52903	0.135323	0.840777	0.483169	2.46733	0.0186947	0.109826	0.171851	0.895201	0.376847	0.999971	0.500978	2.75983	0.00917158	0.0929452	0.6495	3.33624	0.00203343	0.0310984
GPATCH4	0.440265	2.77174	0.00890222	0.300887	0.226901	1.39532	0.171785	0.862032	0.36355	2.10266	0.0428204	0.157611	0.129132	0.761867	0.451287	0.999971	0.476015	2.97004	0.00537259	0.0828581	0.639083	3.71803	0.000705864	0.0177254
GPC4	0.890493	1.26347	0.214844	0.496541	1.80168	2.49695	0.0174259	0.654626	2.48143	3.23446	0.0026763	0.053427	1.10014	1.46281	0.152517	0.999971	1.98506	2.79132	0.00847531	0.0914459	2.65391	3.47965	0.0013732	0.0253734
GPC6	-0.415201	-1.37045	0.179346	0.465431	-0.387307	-1.2487	0.220133	0.878292	-0.457597	-1.38757	0.174114	0.335845	0.139387	0.431156	0.669022	0.999971	-0.421024	-1.37726	0.177252	0.348243	-0.229157	-0.698966	0.489232	0.662847
GPD2	0.401207	1.3035	0.200986	0.484869	0.62884	1.99564	0.0538701	0.768008	1.28099	3.82346	0.000523485	0.0345569	0.498628	1.51819	0.138025	0.999971	1.01259	3.26048	0.00249561	0.0712566	1.27836	3.83807	0.000502138	0.0149157
GPR137	0.0427692	0.205526	0.838362	0.918104	0.18479	0.867384	0.39169	0.918131	0.532717	2.35179	0.0244908	0.123075	0.203183	0.915016	0.366498	0.999971	0.607546	2.89346	0.00654186	0.0867005	0.66912	2.97137	0.00535416	0.0524156
GPR141	0.00697792	0.0252404	0.980008	0.990401	0.494826	1.74833	0.0892507	0.80729	1.15782	3.8475	0.000488807	0.0345117	0.417287	1.41453	0.166117	0.999971	0.869629	3.11751	0.00365381	0.0757036	1.20971	4.0436	0.000278213	0.0110669
GPR174	0.314131	1.03772	0.306579	0.569593	0.380958	1.22926	0.227244	0.880255	1.09499	3.32311	0.0021072	0.0491316	0.416017	1.28791	0.206299	0.999971	1.02868	3.36785	0.00186591	0.0670332	1.23534	3.77114	0.000607399	0.0163691
GPR179	-0.570478	-2.12601	0.0406939	0.345138	-0.364732	-1.3277	0.192947	0.869164	-0.834876	-2.85835	0.0071543	0.0747626	-0.361956	-1.26412	0.214612	0.999971	-0.579502	-2.14035	0.0394349	0.160083	-0.76196	-2.62407	0.0128265	0.0856472
GPR18	0.350675	1.68081	0.101782	0.402688	0.279424	1.3082	0.199404	0.870115	0.668269	2.9426	0.00576684	0.0694639	0.130299	0.585276	0.562149	0.999971	0.634577	3.0144	0.00478841	0.0803514	0.818719	3.62632	0.000913474	0.0202171
GPR34	-0.366902	-0.732585	0.468731	0.687611	-1.74404	-3.40145	0.00170234	0.46181	-2.01412	-3.69454	0.000754216	0.0369759	-1.02772	-1.92304	0.0627121	0.999971	-1.20165	-2.37787	0.0230561	0.127478	-1.38201	-2.54997	0.0153492	0.0945404
GPR68	0.242007	0.556011	0.581771	0.766135	0.985077	2.21067	0.0337462	0.728383	1.93836	4.09126	0.000242318	0.0316065	0.766031	1.64933	0.108104	0.999971	1.74546	3.97438	0.000339758	0.0593092	2.43933	5.17896	9.54399e-06	0.00404174
GPR84	-0.241734	-0.568095	0.573628	0.760075	0.984694	2.26039	0.0301786	0.715094	1.6869	3.642	0.000874213	0.0387666	0.961752	2.11813	0.0414012	0.999971	1.60986	3.74951	0.000645774	0.0606673	2.28723	4.96719	1.80667e-05	0.00428732
GPRC6A	-0.716031	-1.96665	0.0572612	0.363083	-0.491344	-1.3182	0.196074	0.86973	-0.852717	-2.15163	0.0384685	0.150335	-0.247936	-0.638177	0.527548	0.999971	-0.609696	-1.65963	0.106	0.260985	-0.514761	-1.30653	0.199966	0.392318
GPRIN2	-0.799189	-3.03861	0.00449534	0.290058	-0.425904	-1.58175	0.12278	0.830397	-0.939326	-3.28103	0.00236121	0.0514677	-0.579271	-2.06402	0.0465556	0.999971	-0.987536	-3.72119	0.000699592	0.0608829	-0.711736	-2.5007	0.0172707	0.101044
GPX3	0.396479	1.84462	0.0736423	0.377399	0.658627	2.99312	0.00506067	0.541771	0.686219	2.93303	0.00591064	0.0699298	0.447909	1.95291	0.0589322	0.999971	0.990536	4.5673	5.97665e-05	0.0533688	0.846711	3.64032	0.000878337	0.019753
GPX5	-0.417701	-1.21216	0.233641	0.511116	-0.558739	-1.5838	0.12231	0.830397	-0.823734	-2.19608	0.0348626	0.143852	0.0279266	0.0759484	0.939896	0.999971	-0.509988	-1.46675	0.151448	0.318556	-0.418067	-1.12113	0.26993	0.467448
GRID2	-0.527818	-1.73365	0.0918579	0.394778	-0.262668	-0.84272	0.405156	0.919959	-0.456433	-1.37728	0.177246	0.339403	-0.0900117	-0.277066	0.783373	0.999971	-0.309869	-1.00869	0.320105	0.496813	-0.196846	-0.597477	0.554068	0.713954
GRIPAP1	0.424428	1.92067	0.06302	0.368356	0.455791	2.01472	0.0517348	0.762423	0.890044	3.70023	0.000742222	0.036737	0.303616	1.2876	0.206407	0.999971	0.797679	3.57751	0.00104688	0.0643192	0.881654	3.68693	0.000770537	0.0183362
GRM7-AS3	-0.58806	-2.13701	0.0397247	0.344544	-0.118336	-0.42005	0.677038	0.956646	-0.488199	-1.62986	0.112177	0.26046	-0.50424	-1.71723	0.0948505	0.999971	-0.809736	-2.9163	0.0061703	0.0853249	-0.632337	-2.12349	0.0409186	0.162635
GS1-24F4.2	-0.352161	-0.981882	0.332954	0.58847	-0.242133	-0.659432	0.513971	0.93482	-0.593364	-1.51987	0.137604	0.29208	-0.21015	-0.549101	0.586452	0.999971	-1.15505	-3.1917	0.0030006	0.0729188	-0.816079	-2.10265	0.0428216	0.16683
GSAP	0.19451	0.711589	0.481476	0.696971	0.494561	1.76728	0.0859747	0.806978	0.991539	3.33246	0.00205445	0.0485682	0.464545	1.59266	0.120307	0.999971	0.965161	3.49937	0.00130041	0.0666694	1.24235	4.2	0.000176546	0.00899562
GSDMA	-0.190475	-0.795828	0.431543	0.661428	-0.355282	-1.44995	0.156052	0.855362	-0.344935	-1.32399	0.194162	0.35824	-0.272907	-1.06857	0.292642	0.999971	-0.765481	-3.1697	0.00318175	0.0740508	-0.530646	-2.04881	0.0481023	0.177586
GSDMB	0.397393	2.29125	0.0281377	0.331015	0.395136	2.22535	0.0326559	0.725928	0.377742	2.00085	0.0532795	0.175064	0.277302	1.49834	0.143086	0.999971	0.507407	2.89943	0.00644283	0.0863845	0.504525	2.68814	0.0109599	0.078206
GSDMC	-0.699989	-2.76274	0.00910507	0.300887	-0.305786	-1.17887	0.246471	0.886846	-0.608375	-2.20591	0.0341072	0.142292	-0.0422935	-0.156433	0.876598	0.999971	-0.527354	-2.06279	0.0466798	0.172187	-0.613804	-2.2387	0.0316912	0.141112
GSDMD	0.276426	1.10945	0.274865	0.543812	0.336245	1.31821	0.196069	0.86973	0.905748	3.33968	0.00201454	0.0483716	0.275748	1.03717	0.306832	0.999971	0.765203	3.04375	0.00443538	0.0790873	1.00616	3.73177	0.000678995	0.0173487
GSN	0.66877	1.68487	0.100987	0.401945	1.34331	3.3057	0.00220891	0.491426	1.9433	4.49778	7.34677e-05	0.0312363	1.11455	2.63146	0.0125974	0.999971	1.6199	4.04466	0.000277358	0.0593092	2.11038	4.91324	2.12473e-05	0.00438621
GSN-AS1	0.349572	1.37251	0.178712	0.465384	0.888744	3.40842	0.00167018	0.461561	0.788795	2.84517	0.00739775	0.0757782	0.683862	2.51624	0.0166423	0.999971	1.00911	3.92661	0.000389772	0.0593092	1.06914	3.87909	0.000446625	0.014163
GSTA8P	-1.03616	-2.89759	0.00647311	0.299868	-0.693055	-1.89311	0.0667065	0.78595	-1.03087	-2.64838	0.0120863	0.0922704	0.608003	1.59339	0.120141	0.999971	0.097957	0.271487	0.787625	0.870613	0.127549	0.329613	0.743674	0.847352
GSTM5	-0.543248	-2.01781	0.0513963	0.358853	-0.314882	-1.14242	0.261099	0.888798	-0.945118	-3.22504	0.00274478	0.0538983	-0.440425	-1.53306	0.134328	0.999971	-0.589114	-2.16862	0.0370529	0.15605	-0.696608	-2.39104	0.0223608	0.116782
GTF2B	0.389436	1.68553	0.100859	0.401882	0.243486	1.02938	0.310425	0.906095	0.673161	2.67662	0.0112759	0.0897259	0.153965	0.624494	0.536388	0.999971	0.464524	1.99256	0.0542217	0.185183	0.640229	2.56067	0.0149589	0.0932497
GTF2E2	0.252599	1.18927	0.242408	0.517981	0.179495	0.825466	0.414746	0.921976	0.592533	2.56288	0.0148792	0.0994313	0.220464	0.972731	0.337419	0.999971	0.658784	3.07394	0.00409812	0.0777515	0.803153	3.49434	0.00131864	0.0248091
GTF2IP6	-1.72517	-3.37975	0.00180631	0.252013	-1.62376	-3.10722	0.00375438	0.518205	-1.57845	-2.84085	0.00747923	0.0761873	0.247738	0.454833	0.652062	0.999971	-0.173614	-0.337085	0.738083	0.836799	0.330982	0.599203	0.55293	0.712814
GTPBP1	0.50663	2.59072	0.0139106	0.312882	0.395909	1.97753	0.0559675	0.770717	0.80782	3.79499	0.000567635	0.0348534	0.172815	0.828164	0.413237	0.999971	0.576559	2.92197	0.00608113	0.0849701	0.637645	3.01318	0.00480361	0.0493592
GTPBP2	0.464569	2.37756	0.0230727	0.321455	0.443867	2.21888	0.0331327	0.727425	0.747996	3.5168	0.00123918	0.0420092	0.257634	1.23564	0.224894	0.999971	0.573395	2.9083	0.00629817	0.0860609	0.667615	3.15737	0.00328774	0.040033
GTPBP4	0.215261	1.1088	0.275144	0.543931	0.286639	1.44218	0.158217	0.855535	0.751555	3.55643	0.00111015	0.0403063	0.188858	0.911652	0.368242	0.999971	0.590113	3.01248	0.00481235	0.0805133	0.730272	3.47607	0.00138685	0.0254574
GUSBP11	0.658073	2.16154	0.0376368	0.342667	0.410723	1.31777	0.196216	0.86973	0.710106	2.14279	0.0392236	0.151533	-0.0907751	-0.279424	0.781578	0.999971	0.117405	0.382189	0.704652	0.813272	0.394302	1.19684	0.239482	0.436857
GUSBP6	-0.30377	-0.905213	0.371595	0.616534	-0.0714395	-0.207942	0.83649	0.981288	-0.569299	-1.55852	0.128184	0.280601	-0.439481	-1.2273	0.227969	0.999971	-0.80754	-2.38491	0.022682	0.126532	-0.699731	-1.92688	0.0622152	0.204914
GYPB	-0.640167	-1.88987	0.0671526	0.372455	-0.243644	-0.702575	0.487007	0.930107	-0.883317	-2.39564	0.0221226	0.11815	-0.414575	-1.14696	0.259246	0.999971	-0.44749	-1.30926	0.199051	0.372279	-0.979019	-2.67083	0.0114379	0.0802351
GYS1	0.3352	2.14744	0.0388247	0.34314	0.169996	1.06379	0.294771	0.903468	0.496324	2.92113	0.00609425	0.0707573	0.139695	0.838698	0.407379	0.999971	0.440149	2.79461	0.00840555	0.0914459	0.435669	2.57924	0.0143028	0.0910239
GZMB	0.190024	0.469736	0.641482	0.803852	0.71244	1.72025	0.0942944	0.811733	1.58566	3.601	0.000980468	0.0391043	0.448671	1.03939	0.305811	0.999971	1.07282	2.6283	0.012695	0.102323	1.99336	4.55352	6.22651e-05	0.00610012
GZMM	0.102186	0.454736	0.652131	0.810279	0.217906	0.947183	0.350095	0.913126	0.867267	3.54558	0.00114413	0.0405909	0.374795	1.56303	0.127121	0.999971	0.630478	2.78061	0.00870648	0.0917979	1.20672	4.96237	1.83303e-05	0.0043251
HAMP	-0.548945	-2.51473	0.0167026	0.31562	-0.514262	-2.30115	0.0275096	0.706108	-0.147065	-0.618924	0.540009	0.678525	-0.0538167	-0.231039	0.818641	0.999971	-0.345287	-1.56763	0.126041	0.28697	-0.119209	-0.504646	0.616997	0.760848
HAPLN3	0.305243	0.896359	0.376237	0.619258	0.716531	2.05527	0.0474402	0.756923	1.8059	4.87189	2.40555e-05	0.0305198	0.612262	1.68492	0.100978	0.999971	1.24553	3.62488	0.000917154	0.062681	1.79352	4.86698	2.44125e-05	0.00461408
HARS	0.38087	2.05964	0.0469968	0.352372	0.25511	1.34754	0.18654	0.866706	0.6477	3.21777	0.00279867	0.0540434	0.215447	1.09184	0.282424	0.999971	0.547752	2.93563	0.0058713	0.0838481	0.618233	3.08947	0.00393417	0.0442564
HBEGF	0.81537	1.5169	0.138351	0.433645	1.68668	3.06502	0.00419511	0.527042	2.38962	4.0841	0.000247404	0.0316065	1.12182	1.95583	0.0585737	0.999971	1.90569	3.51364	0.00125009	0.0665296	2.53882	4.36466	0.00010889	0.00743008
HCAR2	0.737143	1.38874	0.173762	0.461295	1.86975	3.44072	0.00152856	0.456659	1.76182	3.04928	0.00437175	0.0625683	1.15537	2.03983	0.0490369	0.999971	1.50475	2.80954	0.00809532	0.0905725	1.86693	3.25023	0.00256533	0.035205
HCAR3	0.460394	1.03445	0.308082	0.570649	0.982205	2.15566	0.0381288	0.735106	1.56439	3.22917	0.00271453	0.0536562	0.844121	1.77742	0.0842651	0.999971	1.43804	3.20224	0.00291734	0.0724145	1.62849	3.38127	0.00179882	0.029139
HCG18	0.421687	2.45828	0.019099	0.317977	0.203046	1.1562	0.255496	0.888798	0.279521	1.497	0.143433	0.29948	-0.134469	-0.734632	0.467499	0.999971	0.285531	1.64967	0.108035	0.26367	0.246712	1.32908	0.192496	0.383815
[truncated: 41,824 more rows]
