# Supplementary material for: Modeling gene x environment interactions in PTSD using glucocorticoid-induced transcriptomics in human neurons
Source: Research Square preprint supplement (doi:10.21203/rs.3.rs-267139/v1), 2021-02-25
Supplement: Supplementary file 3 [file 7e36f4352a6f97ebe1c1d945.xlsx]

## Sheet: Sheet1
Supplemental Table 2. Transcriptional responses to hydrocortisone (Hcort) in mixed forebrain (FB) neurons and NGN2 neurons.
	100nM Hcort - NGN2 neurons				1000nM Hcort - NGN2 neurons				2500nM Hcort - NGN2 neurons				100nM Hcort - mixed FB neurons				1000nM Hcort - mixed FB neurons				2500nM Hcort - mixed FB neurons				Module assignments
Gene symbols	logFC	t	P.Value	adj.P.Val	logFC	t	P.Value	adj.P.Val	logFC	t	P.Value	adj.P.Val	logFC	t	P.Value	adj.P.Val	logFC	t	P.Value	adj.P.Val	logFC	t	P.Value	adj.P.Val	NGN2 modules	mixedFB modules
NUDT12	-0.0125643	0.0919903	0.926965	0.981608	-0.347851	2.46418	0.0161592	0.0744556	-0.35124	2.57167	0.0122185	0.0689854	-0.059104	0.432574	0.666637	0.999975	-0.0716129	0.521477	0.60366	0.999994	-0.0930985	0.673017	0.503124	0.99975	black	brown
APH1B	-0.151408	1.80618	0.0751338	0.394129	-0.358652	4.13966	9.45366e-05	0.00236104	-0.255638	3.04966	0.00322038	0.0303285	-0.0642617	0.766316	0.446033	0.999975	-0.100876	1.19686	0.235347	0.999994	-0.0775298	0.913197	0.364234	0.99975	black	turquoise
RINT1	-0.0593283	0.723845	0.471543	0.800963	-0.438616	5.1778	2.0114e-06	0.000122957	-0.237833	2.90179	0.00493981	0.0396802	0.0337213	-0.411272	0.682114	0.999975	0.0664674	-0.806555	0.42262	0.999994	0.0170856	-0.205823	0.837519	0.99975	black	grey
LAMP2	-0.15906	2.04205	0.044868	0.320299	-0.388007	4.81972	7.9271e-06	0.0003708	-0.222501	2.85659	0.00561494	0.0428776	0.0978019	-1.25514	0.213548	0.999975	0.0348231	-0.444646	0.65793	0.999994	-0.0620658	0.786754	0.434048	0.99975	black	cyan
CEP44	-0.02935	0.306187	0.76036	0.933981	-0.255933	2.58334	0.0118479	0.060868	-0.208251	2.17258	0.0331566	0.128924	0.112266	-1.17076	0.245617	0.999975	0.0542203	-0.562576	0.575498	0.999994	-0.0820379	0.845033	0.400935	0.99975	black	green
RP2	-0.156139	1.90369	0.0610093	0.363665	-0.351374	4.14508	9.27577e-05	0.00232007	-0.20741	2.52886	0.0136701	0.0744537	-0.0543084	0.661901	0.510181	0.999975	0.0343236	-0.416216	0.678509	0.999994	-0.0433361	0.521695	0.603509	0.99975	black	pink
METTL4	-0.131763	1.38748	0.169642	0.542535	-0.293362	2.98893	0.00384516	0.0294749	-0.206491	2.17443	0.0330117	0.128579	-0.00562802	0.0592422	0.952926	0.999975	-0.0197399	0.206738	0.836807	0.999994	-0.0664903	0.691311	0.491628	0.99975	black	green
ATG5	-0.0465058	0.818503	0.415813	0.767993	-0.237487	4.04417	0.000131868	0.00299319	-0.193325	3.40261	0.00110086	0.0154953	-0.0265295	0.466748	0.642111	0.999975	-0.0456973	0.799916	0.426432	0.999994	0.00832785	-0.144719	0.885343	0.99975	black	grey
KLHL7	-0.0340181	0.532355	0.596144	0.866075	-0.289193	4.37882	4.03719e-05	0.00124294	-0.189734	2.96925	0.00407063	0.0350957	0.0214347	-0.335314	0.738379	0.999975	0.00951598	-0.148111	0.882676	0.999994	0.0542627	-0.838445	0.404599	0.99975	black	grey
MFAP3	-0.109835	1.30674	0.195524	0.575547	-0.350856	4.03883	0.000134328	0.00302069	-0.187364	2.22918	0.0289724	0.118721	-0.0141117	0.16783	0.867195	0.999975	-0.00667358	0.0789677	0.937281	0.999994	-0.116664	1.37046	0.174867	0.99975	black	grey
C18orf25	-0.0712664	0.812068	0.419471	0.770244	-0.221182	2.43857	0.0172524	0.0777474	-0.184645	2.10405	0.0389214	0.143121	0.0497622	-0.566824	0.572624	0.999975	0.052617	-0.596315	0.552864	0.999994	-0.0686791	0.772705	0.442266	0.99975	black	brown
COG6	-0.029214	0.373518	0.709877	0.916465	-0.271394	3.35736	0.00126827	0.014279	-0.177351	2.26759	0.026404	0.111926	-0.0443386	0.566687	0.572717	0.999975	0.0429232	-0.545825	0.5869	0.999994	-0.0132415	0.167162	0.867718	0.99975	black	grey
TSN	-0.0206254	0.371734	0.7112	0.916491	-0.234444	4.08834	0.000113112	0.00270144	-0.174376	3.14288	0.00244246	0.0255769	-0.0289063	0.52079	0.604136	0.999975	0.00917588	-0.164482	0.86982	0.999994	0.00641457	-0.114151	0.909441	0.99975	black	brown
HSPA14	-0.0167749	0.27158	0.786734	0.941701	-0.261875	4.10212	0.000107805	0.00261902	-0.163137	2.64119	0.0101564	0.0619181	-0.114503	1.85308	0.0680324	0.999975	-0.108517	1.74733	0.0849094	0.999994	-0.100399	1.6049	0.112962	0.99975	black	green
RPE	0.0168224	-0.217353	0.828557	0.954152	-0.183344	2.29204	0.0248758	0.0985776	-0.159877	2.06573	0.0425099	0.151765	0.0432592	-0.558723	0.578111	0.999975	0.0378473	-0.486355	0.628216	0.999994	-0.00900299	0.114854	0.908886	0.99975	black	black
TMEM41B	-0.0806592	1.16583	0.24759	0.63536	-0.280355	3.92074	0.000201503	0.00409119	-0.147988	2.13904	0.0358777	0.135724	0.0699386	-1.01051	0.315688	0.999975	0.0611963	-0.879729	0.381978	0.999994	0.081506	-1.1632	0.24865	0.99975	black	grey
2020-09-02	-0.0582514	0.920882	0.360235	0.728738	-0.26983	4.1273	9.87219e-05	0.00244752	-0.143793	2.27324	0.0260435	0.111026	0.062637	-0.98985	0.325614	0.999975	0.0788388	-1.23959	0.219214	0.999994	-0.00768996	0.120034	0.904796	0.99975	black	grey
SAR1B	-0.121026	1.7767	0.0799077	0.403108	-0.279384	3.96838	0.000171228	0.00363334	-0.141464	2.07678	0.0414469	0.149133	-0.0584724	0.858076	0.393742	0.999975	-0.0314309	0.458915	0.647699	0.999994	-0.0175797	0.254815	0.799603	0.99975	black	black
KLHL9	-0.0609625	1.00977	0.316041	0.698746	-0.246239	3.94632	0.000184661	0.00382075	-0.134603	2.22959	0.0289437	0.118658	0.00575845	-0.0953465	0.924309	0.999975	0.0556838	-0.917336	0.362077	0.999994	-0.0219063	0.358269	0.721206	0.99975	black	red
RAB10	-0.0496279	0.831128	0.408692	0.762754	-0.240863	3.90293	0.000214096	0.00424427	-0.122706	2.05503	0.043562	0.154091	0.0347954	-0.582513	0.562069	0.999975	0.0276763	-0.46099	0.646217	0.999994	-0.0749162	1.23879	0.219507	0.99975	black	grey
CGGBP1	-0.0876225	1.65156	0.103048	0.444676	-0.242799	4.42795	3.37985e-05	0.00107983	-0.111512	2.10188	0.0391174	0.143527	-0.0206956	0.38994	0.69775	0.999975	-0.0222217	0.416578	0.678246	0.999994	-0.020296	0.37772	0.706767	0.99975	black	brown
DDX1	0.0453082	-0.934491	0.353222	0.725176	-0.15123	3.01796	0.00353369	0.0278763	-0.10081	2.07927	0.0412106	0.14863	-0.0299294	0.617074	0.539162	0.999975	0.0366118	-0.751037	0.455116	0.999994	0.0522631	-1.06433	0.290793	0.99975	black	grey
ARMC8	-0.0371971	0.774091	0.441451	0.78347	-0.185624	3.73762	0.00037298	0.00631567	-0.0966592	2.01157	0.0480668	0.163601	-0.0187589	0.39024	0.697529	0.999975	0.0165791	-0.343151	0.732501	0.999994	0.00730869	-0.150177	0.881051	0.99975	black	grey
UTP15	-0.0160932	0.186872	0.852295	0.961661	-0.248705	2.79425	0.00668592	0.0421492	-0.171366	1.98993	0.050456	0.168482	0.0796417	-0.924452	0.358387	0.999975	0.129638	-1.49719	0.138784	0.999994	0.0237315	-0.272087	0.786346	0.99975	black	black
CMTR2	-0.0968637	0.959749	0.340443	0.716026	-0.457779	4.38865	3.89652e-05	0.00121064	-0.198963	1.97142	0.0525788	0.173449	-0.0059057	0.0584938	0.95352	0.999975	-0.0152255	0.150041	0.881158	0.999994	-0.156083	1.52698	0.131216	0.99975	black	brown
WDR75	0.0412295	-0.720243	0.473743	0.802511	-0.207631	3.50945	0.000784539	0.0102947	-0.112672	1.96833	0.0529415	0.174036	0.0386551	-0.675023	0.501857	0.999975	0.0477906	-0.830337	0.409136	0.999994	0.0166971	-0.288	0.774187	0.99975	black	grey
KLRA1P	0.182733	-0.639151	0.524785	0.829473	-0.748824	2.53422	0.0134804	0.0663174	-0.556977	1.9482	0.0553498	0.178726	0.0408083	-0.142684	0.886944	0.999975	-0.106474	0.370402	0.712187	0.999994	-0.00583557	0.0201535	0.983978	0.99975	black	grey
LEPROTL1	-0.0774652	1.02435	0.309154	0.691806	-0.263282	3.36852	0.00122488	0.0139294	-0.14488	1.91585	0.0594176	0.187046	0.0509206	-0.673092	0.503077	0.999975	0.0402519	-0.529381	0.598195	0.999994	0.0769069	-1.00412	0.318734	0.99975	black	grey
DLD	-0.019437	0.277758	0.782006	0.940082	-0.169946	2.34978	0.0215733	0.0897104	-0.133395	1.90629	0.0606668	0.189464	0.00768171	-0.109733	0.912931	0.999975	0.021797	-0.309795	0.757625	0.999994	0.032549	-0.459258	0.647454	0.99975	black	black
GABPA	0.0433253	-0.447234	0.65607	0.894217	-0.32776	3.2736	0.00164329	0.0168631	-0.184471	1.90429	0.060931	0.190098	0.0896282	-0.924867	0.358173	0.999975	0.0953619	-0.97906	0.330879	0.999994	-0.0462231	0.471122	0.639	0.99975	black	brown
HCCS	-0.0122666	0.176135	0.86069	0.964201	-0.197852	2.74879	0.00758187	0.0457743	-0.132365	1.90067	0.0614111	0.191048	0.00634525	-0.0910776	0.927688	0.999975	0.0342066	-0.48851	0.626696	0.999994	0.109382	-1.55077	0.12541	0.99975	black	greenyellow
LDAH	-0.000294366	0.0037421	0.997025	0.999494	-0.252045	3.10016	0.00277416	0.0240285	-0.142272	1.80866	0.0747442	0.216906	0.0466219	-0.592459	0.555428	0.999975	0.0152003	-0.192185	0.848147	0.999994	-0.0301404	0.378319	0.706324	0.99975	black	brown
ZNF28	0.175283	-1.61934	0.109815	0.457441	-0.140799	1.25857	0.212315	0.396069	0.195709	-1.80809	0.0748333	0.217053	0.076769	-0.708966	0.480671	0.999975	0.014555	-0.133737	0.89399	0.999994	-0.0870441	0.793997	0.429847	0.99975	black	brown
SHOC2	-0.0785812	1.21225	0.229442	0.615418	-0.216558	3.2324	0.00186391	0.0183818	-0.117126	1.80691	0.0750191	0.217442	-0.0728609	1.12359	0.264976	0.999975	-0.0333886	0.512286	0.610043	0.999994	-0.0398579	0.607113	0.545716	0.99975	black	grey
VPS4B	-0.0378508	0.659834	0.511498	0.824954	-0.196335	3.31158	0.00146187	0.0156859	-0.103493	1.80419	0.0754485	0.218313	-0.0224912	0.391935	0.696282	0.999975	0.0215885	-0.374304	0.709295	0.999994	0.0379349	-0.652951	0.5159	0.99975	black	grey
AKTIP	-0.0564059	0.855552	0.395128	0.75345	-0.146911	2.15603	0.034476	0.121192	-0.116463	1.76653	0.0816108	0.229208	-0.0441351	0.669186	0.50555	0.999975	-0.0235532	0.355315	0.723409	0.999994	-0.0450979	0.675397	0.50162	0.99975	black	brown
ZW10	-0.0401571	0.490224	0.625489	0.88049	-0.255395	3.01662	0.00354744	0.0279084	-0.144184	1.76019	0.0826888	0.230982	0.0734995	-0.896927	0.372793	0.999975	0.0671291	-0.815049	0.417774	0.999994	0.00900674	-0.108563	0.913856	0.99975	black	turquoise
NCOA4	-0.0440778	0.841756	0.402755	0.757761	-0.226047	4.17678	8.29733e-05	0.00214502	-0.0917664	1.75251	0.0840094	0.233546	-0.00944892	0.18038	0.857368	0.999975	-0.00253396	0.0481291	0.961749	0.999994	0.0325438	-0.613643	0.541415	0.99975	black	brown
NOL11	-0.0835994	1.5287	0.130789	0.489643	-0.211914	3.74934	0.000358748	0.00612986	-0.0956585	1.74925	0.0845752	0.234312	-0.0734919	1.34338	0.183433	0.999975	0.0240555	-0.437496	0.663082	0.999994	0.0662755	-1.19661	0.235445	0.99975	black	grey
RCHY1	0.0106758	-0.18471	0.853983	0.962375	-0.217844	3.64683	0.00050302	0.00763913	-0.100321	1.73579	0.0869456	0.238469	-0.0492885	0.85247	0.396824	0.999975	-0.0429425	0.73896	0.462371	0.999994	0.0778756	-1.33038	0.187657	0.99975	black	grey
UBR7	0.0457889	-0.681323	0.497886	0.816506	-0.224144	3.22698	0.0018949	0.0186224	-0.116005	1.72615	0.088676	0.24148	-0.0462888	0.688509	0.493379	0.999975	0.0144394	-0.213689	0.831403	0.999994	-0.00699461	0.102763	0.918441	0.99975	black	turquoise
COPB1	-0.0147536	0.260883	0.794939	0.944545	-0.217256	3.71702	0.000399311	0.00657737	-0.0957966	1.69398	0.0946592	0.251825	0.044748	-0.790972	0.431598	0.999975	0.0565175	-0.993964	0.323621	0.999994	-0.000537898	0.00939135	0.992533	0.99975	black	black
SLC38A2	-0.0997926	1.17407	0.244295	0.631837	-0.341014	3.88192	0.000229911	0.00444923	-0.142353	1.67484	0.0983707	0.25837	0.0464029	-0.545737	0.58696	0.999975	-0.0266043	0.311308	0.75648	0.999994	-0.0602963	0.700437	0.485947	0.99975	black	grey
GTF2E1	0.0204427	-0.29399	0.769625	0.937288	-0.236022	3.28416	0.00159086	0.0165116	-0.116266	1.67208	0.0989158	0.259104	-0.0139093	0.199959	0.842085	0.999975	0.0335765	-0.480254	0.632525	0.999994	-0.0392243	0.556969	0.579303	0.99975	black	pink
CDC42SE2	-0.160745	1.84704	0.0689146	0.381101	-0.296032	3.2912	0.00155674	0.0163121	-0.145423	1.67103	0.0991256	0.259427	0.010309	-0.118412	0.906076	0.999975	-0.0103876	0.118712	0.905839	0.999994	-0.0181527	0.205949	0.837421	0.99975	black	brown
DHX15	0.0116377	-0.248874	0.804178	0.947543	-0.171969	3.5583	0.000670621	0.00922472	-0.0770995	1.64883	0.103607	0.26646	0.0200874	-0.429417	0.668922	0.999975	0.0179668	-0.382143	0.703499	0.999994	0.0152824	-0.32269	0.74788	0.99975	black	grey
AKAP10	-0.00731338	0.105466	0.916304	0.979389	-0.206678	2.88381	0.00519885	0.0358	-0.114057	1.64485	0.104427	0.267797	0.0281933	-0.406426	0.685654	0.999975	0.00466975	-0.0669776	0.946788	0.999994	-0.0536318	0.763657	0.447606	0.99975	black	grey
TVP23B	-0.0648863	0.865849	0.389493	0.750001	-0.196372	2.5354	0.0134387	0.066189	-0.122112	1.62951	0.10764	0.272572	0.0207679	-0.277027	0.782565	0.999975	-0.00984692	0.130687	0.896393	0.999994	0.0344473	-0.453865	0.651313	0.99975	black	greenyellow
ATP6V1C1	-0.0252121	0.319743	0.750103	0.930649	-0.248725	3.05204	0.00319792	0.0262727	-0.127602	1.61831	0.110037	0.276654	0.0379892	-0.481607	0.631568	0.999975	-0.0591482	0.746063	0.458096	0.999994	-0.0576889	0.72238	0.472437	0.99975	black	grey
GTF3C3	0.0444441	-0.745519	0.458423	0.794034	-0.152713	2.47856	0.0155733	0.0729267	-0.0964187	1.6174	0.110233	0.276938	0.0282008	-0.472877	0.637754	0.999975	-0.00859315	0.143364	0.88641	0.999994	-0.0930973	1.54193	0.127544	0.99975	black	brown
SPIN1	-0.00884558	0.139453	0.889488	0.971483	-0.251906	3.84254	0.00026263	0.00489232	-0.100254	1.58057	0.118427	0.290416	-0.086357	1.36094	0.177842	0.999975	-0.0416628	0.653268	0.515696	0.999994	-0.0535615	0.833749	0.407223	0.99975	black	red
WDR36	-0.00227615	0.0292567	0.976742	0.995217	-0.162076	2.01567	0.0476257	0.149227	-0.121207	1.55798	0.12369	0.298652	0.0245918	-0.315977	0.752948	0.999975	0.0488112	-0.624001	0.53463	0.999994	-0.0744501	0.944867	0.347936	0.99975	black	blue
DDX3X	0.0660464	-0.988702	0.326171	0.706003	-0.210801	3.05328	0.00318623	0.0262332	-0.10321	1.54506	0.126783	0.303265	0.0438745	-0.656553	0.513594	0.999975	0.0252136	-0.375399	0.708484	0.999994	-0.071929	1.06317	0.291314	0.99975	black	green
RAB33B	-0.00789369	0.0886394	0.929618	0.982047	-0.200063	2.17366	0.033072	0.118004	-0.136361	1.53125	0.130158	0.308338	-0.0297363	0.333791	0.739522	0.999975	-0.00523434	0.0584588	0.953548	0.999994	-0.0152245	0.1688	0.866435	0.99975	black	salmon
NDC1	-0.0197844	0.236793	0.8135	0.950524	-0.150846	1.74686	0.0849919	0.215187	-0.127817	1.52984	0.130507	0.308858	-0.00474919	0.0568207	0.954848	0.999975	-0.0375664	0.447185	0.656105	0.999994	-0.0790782	0.934511	0.353213	0.99975	black	turquoise
SERINC1	0.0877232	-1.13507	0.260167	0.648809	-0.139455	1.74591	0.0851586	0.215505	-0.115692	1.49701	0.13883	0.321897	-0.0169572	0.219333	0.827021	0.999975	0.00932209	-0.119968	0.904848	0.999994	0.0060224	-0.0769415	0.938887	0.99975	black	red
TWSG1	-0.0113303	0.133029	0.894548	0.972919	-0.180084	2.04576	0.0444909	0.142845	-0.127345	1.49518	0.139305	0.322555	0.0874628	-1.02652	0.308135	0.999975	0.113352	-1.32365	0.189871	0.999994	-0.00722228	0.0837257	0.93351	0.99975	black	black
FOXN2	-0.0796991	0.882495	0.380492	0.744668	-0.240626	2.57797	0.0120172	0.0615172	-0.134473	1.48903	0.140915	0.324818	0.0475448	-0.526263	0.600348	0.999975	0.00808088	-0.0889936	0.929338	0.999994	-0.0674624	0.737568	0.463211	0.99975	black	blue
CCDC178	-0.09682	0.299031	0.765791	0.936086	-1.00034	2.98934	0.0038406	0.0294533	-0.476164	1.47068	0.145802	0.331792	-0.068632	0.211894	0.832798	0.999975	0.00305151	-0.00937363	0.992547	0.999994	0.247291	-0.754121	0.453274	0.99975	black	red
FASTKD2	-0.0280943	0.57627	0.566258	0.852084	-0.193842	3.84711	0.000258618	0.00483354	-0.0711768	1.46001	0.148704	0.336047	0.0169629	-0.347815	0.729009	0.999975	0.0610439	-1.24535	0.217103	0.999994	-0.0158017	0.320031	0.749886	0.99975	black	brown
MBTPS2	0.0300167	-0.327504	0.744252	0.92904	-0.237168	2.50373	0.0145931	0.069922	-0.133586	1.45755	0.149379	0.336898	0.019885	-0.21688	0.828924	0.999975	0.0279834	-0.303665	0.762272	0.999994	-0.00858868	0.0925256	0.926541	0.99975	black	grey
MAPK6	-0.0602752	0.899079	0.371654	0.738814	-0.176018	2.54035	0.013266	0.0656402	-0.0975117	1.45454	0.150209	0.338139	0.0310696	-0.463272	0.644588	0.999975	0.00057156	-0.00847936	0.993258	0.999994	-0.0466203	0.686619	0.494563	0.99975	black	blue
RIMKLB	0.0577115	-0.731905	0.466639	0.798222	-0.183662	2.25366	0.0273112	0.104979	-0.114049	1.44642	0.152467	0.341995	-0.0849697	1.0772	0.285041	0.999975	-0.0532129	0.671198	0.504275	0.999994	-0.0767627	0.961222	0.339707	0.99975	black	blue
EPS15	-0.0848883	0.927638	0.356743	0.727419	-0.198812	2.10209	0.0390987	0.130997	-0.12976	1.41802	0.160565	0.354294	-0.0264706	0.289158	0.773304	0.999975	-0.0615824	0.669313	0.50547	0.999994	-0.0516328	0.557106	0.57921	0.99975	black	blue
DCP2	-0.0963726	1.17843	0.242567	0.629196	-0.191266	2.26289	0.026707	0.103414	-0.114248	1.39703	0.166761	0.363159	-0.0649341	0.793711	0.430012	0.999975	-0.0448058	0.544909	0.587526	0.999994	-0.0471424	0.569169	0.57104	0.99975	black	turquoise
DOP1A	0.0766497	-0.835569	0.406204	0.761206	-0.0556885	0.587375	0.558818	0.730636	0.126159	-1.37531	0.173365	0.371828	-0.0652646	0.711199	0.479294	0.999975	-0.000166319	0.00180325	0.998566	0.999994	-0.0268518	0.28902	0.77341	0.99975	black	red
DHX40	0.100048	-1.55096	0.125365	0.482675	-0.203058	3.0457	0.00325806	0.0266516	-0.088049	1.36497	0.176577	0.376477	-0.00182292	0.0282487	0.977543	0.999975	-0.056099	0.864941	0.389988	0.999994	-0.0772959	1.18312	0.240715	0.99975	black	green
RIOK3	-0.04872	0.792391	0.430776	0.777482	-0.159471	2.50952	0.0143755	0.0691926	-0.0838776	1.36423	0.176809	0.37664	0.0689544	-1.12108	0.266038	0.999975	-0.03101	0.50162	0.617489	0.999994	-0.0608134	0.976592	0.332092	0.99975	black	grey
ZNF569	0.106179	-1.12279	0.265316	0.654231	-0.159467	1.63157	0.107205	0.251856	0.127467	-1.34793	0.181973	0.383859	-0.0297203	0.314161	0.754321	0.999975	0.00034274	-0.00360466	0.997134	0.999994	0.0110152	-0.115009	0.908763	0.99975	black	red
SLC30A6	0.00862015	-0.0874932	0.930526	0.982212	-0.307353	3.01839	0.00352921	0.0278763	-0.13199	1.33971	0.184618	0.386516	-0.0444711	0.45121	0.653215	0.999975	0.0157912	-0.15941	0.873799	0.999994	0.00992807	-0.0994961	0.921025	0.99975	black	black
UBA2	0.0796511	-1.79529	0.0768694	0.397507	-0.102792	2.24171	0.0281109	0.106743	-0.0593495	1.33773	0.185259	0.387556	0.0479832	-1.08112	0.283308	0.999975	-0.0134723	0.302012	0.763527	0.999994	-0.0231178	0.514483	0.608515	0.99975	black	grey
THAP9	-0.0377081	0.340169	0.734735	0.925414	-0.310949	2.71411	0.00833777	0.0488799	-0.145788	1.3152	0.19268	0.398254	0.0726447	-0.655096	0.514526	0.999975	0.12649	-1.1349	0.260241	0.999994	-0.00556314	0.049552	0.960619	0.99975	black	brown
PEX13	-0.0828814	1.31305	0.193401	0.572899	-0.160148	2.45484	0.0165506	0.0756416	-0.0826671	1.30968	0.194531	0.40073	0.024073	-0.381236	0.704168	0.999975	0.0147772	-0.232839	0.816557	0.999994	0.0233637	-0.365465	0.715853	0.99975	black	grey
ZNF160	0.17751	-1.92683	0.0580087	0.355892	0.00179467	-0.0188488	0.985015	0.99201	0.117994	-1.28083	0.204428	0.413569	0.0967317	-1.04962	0.297458	0.999975	-0.0768883	0.830087	0.409276	0.999994	-0.276469	2.96312	0.00414335	0.99975	black	grey
ZNF84	0.096276	-1.09906	0.275458	0.663498	-0.118996	1.31436	0.192962	0.372313	0.111408	-1.27183	0.207588	0.417717	0.0125038	-0.142688	0.886941	0.999975	-0.0255515	0.29011	0.772579	0.999994	-0.112041	1.26289	0.210767	0.99975	black	red
SETDB2	-0.0755699	0.914138	0.363743	0.730433	-0.211611	2.47673	0.0156468	0.0731092	-0.105019	1.2704	0.208094	0.418387	-0.0482021	0.582868	0.561832	0.999975	-0.141584	1.70341	0.0928721	0.999994	-0.150401	1.79637	0.0766964	0.99975	black	blue
MIER3	-0.0214483	0.240111	0.810937	0.950152	-0.237062	2.56779	0.0123444	0.0624756	-0.113343	1.26889	0.208631	0.419169	-0.048413	0.541779	0.589669	0.999975	-0.0274384	0.305506	0.760876	0.999994	-0.082482	0.911717	0.365007	0.99975	black	red
NANP	-0.0319198	0.346063	0.73032	0.923909	-0.340094	3.56756	0.000650867	0.00907837	-0.11655	1.26362	0.210506	0.421237	-0.123181	1.33499	0.18615	0.999975	-0.0790291	0.852163	0.396993	0.999994	-0.0357007	0.382167	0.703481	0.99975	black	pink
CLIC4	0.0135078	-0.119712	0.90505	0.975324	-0.255617	2.1919	0.0316719	0.114692	-0.142079	1.2592	0.212089	0.423219	0.0945121	-0.837303	0.405236	0.999975	0.137367	-1.21082	0.229986	0.999994	-0.0252479	0.220933	0.82578	0.99975	black	pink
MTM1	-0.0728327	0.593211	0.554927	0.845976	-0.457534	3.60565	0.000575291	0.00838331	-0.151505	1.23401	0.221273	0.434614	0.0542131	-0.441396	0.660269	0.999975	0.0319449	-0.258777	0.796557	0.999994	-0.0448937	0.361035	0.719147	0.99975	black	brown
SLC35D1	0.00995754	-0.100411	0.920302	0.979608	-0.195773	1.9101	0.0601654	0.173055	-0.122133	1.2316	0.222167	0.435713	-0.0750692	0.756712	0.45173	0.999975	0.023182	-0.232498	0.816821	0.999994	-0.0362354	0.360779	0.719337	0.99975	black	black
TBC1D23	0.0592443	-0.976782	0.331998	0.709746	-0.138213	2.20485	0.0307104	0.11253	-0.073435	1.21078	0.230001	0.44506	0.0348818	-0.574899	0.56718	0.999975	0.0782681	-1.28344	0.203515	0.999994	0.0183839	-0.299275	0.765605	0.99975	black	grey
FAM126B	0.0991123	-0.99237	0.324392	0.704008	0.0250081	-0.242273	0.809268	0.895702	0.120779	-1.20934	0.230549	0.445649	-0.0848027	0.848784	0.398858	0.999975	-0.0656211	0.653478	0.515562	0.999994	-0.192882	1.90686	0.0605909	0.99975	black	blue
NMD3	-0.0234979	0.304755	0.761446	0.93416	-0.17461	2.19113	0.0317303	0.114805	-0.0925304	1.2001	0.234097	0.449582	0.0431812	-0.559831	0.577359	0.999975	0.0231297	-0.298355	0.766305	0.999994	-0.0102462	0.131209	0.895982	0.99975	black	grey
FBXO38	0.0323798	-0.563507	0.574868	0.857116	-0.12734	2.14421	0.0354457	0.123544	-0.0687963	1.19729	0.235181	0.450896	0.000427716	-0.00744083	0.994084	0.999975	-0.0573986	0.993498	0.323846	0.999994	-0.0687561	1.18145	0.24137	0.99975	black	grey
IKZF5	-0.0228856	0.266822	0.790381	0.942236	-0.262467	2.96081	0.00417104	0.0313207	-0.102547	1.19561	0.235831	0.451683	0.0228977	-0.266865	0.790348	0.999975	0.0167495	-0.194224	0.846556	0.999994	-0.0194534	0.223941	0.823447	0.99975	black	brown
SEC23A	-0.0583502	0.63497	0.527492	0.830399	-0.308028	3.24323	0.00180334	0.017936	-0.10968	1.19358	0.236622	0.452685	0.0401866	-0.437153	0.663329	0.999975	0.0866405	-0.937721	0.351572	0.999994	-0.00527157	0.0566412	0.95499	0.99975	black	pink
ELP2	0.0364651	-0.609986	0.543821	0.840764	-0.21494	3.47886	0.000864986	0.0110062	-0.0704811	1.17903	0.242327	0.45991	-0.00830022	0.138795	0.890006	0.999975	-0.0426165	0.709025	0.480634	0.999994	-0.117348	1.9382	0.0565811	0.99975	black	grey
TENT2	0.0674967	-0.879194	0.382266	0.745986	-0.195142	2.45941	0.0163581	0.0750725	-0.0902523	1.17563	0.243676	0.461694	-0.0145015	0.188823	0.850771	0.999975	-0.0166503	0.215708	0.829835	0.999994	-0.083869	1.07866	0.284395	0.99975	black	green
STK38L	0.0987658	-0.974682	0.333032	0.709801	-0.208315	1.98909	0.0505506	0.155068	-0.117931	1.16385	0.248387	0.466963	0.0614391	-0.606097	0.546386	0.999975	0.124472	-1.22172	0.225862	0.999994	-0.0500595	0.487781	0.62721	0.99975	black	grey
ZNF81	0.123266	-1.16025	0.24984	0.638862	-0.152875	1.39226	0.168194	0.34005	0.122353	-1.15168	0.253321	0.47241	0.0381158	-0.358635	0.720934	0.999975	0.0030619	-0.0286641	0.977213	0.999994	-0.234964	2.18368	0.0322967	0.99975	black	red
SLC39A6	0.044213	-0.749284	0.456165	0.792068	-0.103113	1.69078	0.0952715	0.232015	-0.0677481	1.14817	0.254759	0.474189	0.00167675	-0.0284057	0.977418	0.999975	0.0207707	-0.350097	0.727304	0.999994	-0.0149974	0.250954	0.802576	0.99975	black	grey
RXYLT1	0.0307212	-0.349185	0.727986	0.923152	-0.154843	1.70289	0.092969	0.228052	-0.100954	1.1475	0.255033	0.474453	0.0376086	-0.427313	0.670446	0.999975	0.0203963	-0.230574	0.81831	0.999994	0.0432546	-0.485435	0.628865	0.99975	black	grey
AC118549.1	0.107343	-1.45911	0.148951	0.51482	-0.0700497	0.921299	0.360019	0.556745	0.0843474	-1.14657	0.255416	0.47501	0.0750569	-1.01988	0.311254	0.999975	0.0445129	-0.601789	0.549234	0.999994	0.00965623	-0.1296	0.89725	0.99975	black	grey
RPRD1A	-0.0227217	0.34645	0.730031	0.923818	-0.19706	2.90721	0.0048641	0.0344228	-0.0748719	1.14164	0.257445	0.47721	-0.00419722	0.063974	0.949171	0.999975	-0.0570679	0.865433	0.38972	0.999994	-0.031117	0.468467	0.640888	0.99975	black	red
RANBP6	-0.0521009	0.729606	0.468035	0.798907	-0.248465	3.36656	0.0012324	0.0139774	-0.0814282	1.14033	0.257988	0.477443	-0.0485656	0.679851	0.498813	0.999975	0.0730317	-1.01718	0.312528	0.999994	0.0388348	-0.536964	0.592974	0.99975	black	red
PTCD2	-0.0380207	0.541405	0.589926	0.864384	-0.187857	2.58826	0.0116948	0.0603378	-0.0800865	1.14044	0.257941	0.477443	0.0106651	-0.151813	0.879766	0.999975	0.0566752	-0.80267	0.424848	0.999994	0.0798829	-1.12315	0.265163	0.99975	black	black
ZDHHC17	0.00075833	-0.00918441	0.992698	0.998917	-0.16528	1.93683	0.056752	0.166721	-0.0930336	1.12679	0.263631	0.483909	-0.0270101	0.327009	0.744624	0.999975	-0.0549531	0.661952	0.510148	0.999994	-0.113955	1.36273	0.177281	0.99975	black	red
ZNF585B	0.107011	-1.18904	0.238392	0.624294	-0.253109	2.72114	0.00817908	0.0481726	0.100789	-1.11993	0.266523	0.486581	-0.0874434	0.971258	0.334722	0.999975	-0.122096	1.3493	0.181534	0.999994	-0.198188	2.17433	0.0330196	0.99975	black	turquoise
CASC2	0.0570087	-0.434213	0.665453	0.897708	-0.215043	1.58476	0.117471	0.26786	-0.145328	1.10693	0.272064	0.492178	-0.0607592	0.46261	0.645061	0.999975	-0.0697324	0.528247	0.598977	0.999994	-0.146416	1.10111	0.274573	0.99975	black	brown
MATR3	0.0926186	-1.57722	0.119197	0.472677	-0.115394	1.90132	0.0613248	0.174964	-0.0640787	1.09123	0.278864	0.499893	-0.0098889	0.168338	0.866796	0.999975	-0.021598	0.365804	0.715601	0.999994	-0.00932273	0.156754	0.875884	0.99975	black	red
CCP110	0.0803873	-0.946659	0.347028	0.721133	-0.0818356	0.932451	0.354268	0.551458	0.0924993	-1.08932	0.279702	0.500766	-0.0545279	0.641899	0.523009	0.999975	-0.0593051	0.694608	0.489571	0.999994	-0.10765	1.2517	0.214793	0.99975	black	grey
ZSCAN30	0.164805	-2.1	0.0392882	0.303534	-0.0239109	0.294796	0.769011	0.872074	0.0853852	-1.08803	0.280266	0.501082	0.00586772	-0.0747409	0.940631	0.999975	-0.030475	0.386219	0.700491	0.999994	-0.0813258	1.02319	0.309695	0.99975	black	grey
PITPNB	-0.0141307	0.237457	0.812987	0.950516	-0.140126	2.27834	0.0257222	0.100916	-0.064658	1.08656	0.28091	0.501756	-0.0135796	0.228113	0.820215	0.999975	0.0190784	-0.318865	0.750766	0.999994	-0.00166092	0.0275583	0.978092	0.99975	black	grey
SLC39A10	-0.0312556	0.356791	0.722308	0.921788	-0.20906	2.30906	0.0238587	0.0957344	-0.095024	1.08475	0.281707	0.502808	0.0438991	-0.500937	0.617967	0.999975	-0.0498502	0.565972	0.5732	0.999994	-0.0996548	1.12322	0.265132	0.99975	black	blue
TARDBP	0.017893	-0.245779	0.806563	0.948258	-0.192085	2.5529	0.012837	0.0641582	-0.0788477	1.08308	0.282441	0.50363	-0.0270801	0.371838	0.711123	0.999975	-0.00183905	0.0251245	0.980026	0.999994	-0.0440747	0.597768	0.551899	0.99975	black	turquoise
WASHC5	-0.0115486	0.160864	0.872658	0.965862	-0.210277	2.83399	0.00598353	0.0391839	-0.0776649	1.08184	0.282989	0.504194	0.0440377	-0.613188	0.541714	0.999975	0.0422993	-0.586006	0.559732	0.999994	-0.0382033	0.525425	0.600927	0.99975	black	grey
ZNF615	0.101684	-1.15444	0.252197	0.640245	-0.187544	2.06016	0.0430552	0.139773	-0.0935694	1.06234	0.291686	0.513263	-0.108931	1.23627	0.220438	0.999975	-0.119076	1.34457	0.183049	0.999994	-0.130917	1.46756	0.146647	0.99975	black	brown
ERI1	-0.00970751	0.125978	0.900106	0.97436	-0.163567	2.05381	0.0436833	0.141324	-0.0812764	1.05478	0.295108	0.516063	0.130922	-1.69841	0.0938162	0.999975	0.206153	-2.66083	0.00963405	0.999994	0.0781873	-1.00185	0.319822	0.99975	black	pink
DDX5	0.0587958	-1.15226	0.253084	0.640963	-0.115729	2.19445	0.0314809	0.114294	-0.0537196	1.05281	0.296005	0.517261	0.0152262	-0.298288	0.766356	0.999975	0.0444158	-0.865732	0.389557	0.999994	0.0130392	-0.252312	0.80153	0.99975	black	grey
NNT	0.000271924	-0.00392792	0.996877	0.999494	-0.146226	2.04371	0.0446992	0.143323	-0.0723608	1.04527	0.299448	0.520685	0.0074647	-0.107788	0.914469	0.999975	0.00807348	-0.115989	0.907989	0.999994	-0.0452761	0.645752	0.520525	0.99975	black	brown
CDC23	-0.0255402	0.459264	0.64745	0.889598	-0.150128	2.61203	0.0109795	0.057738	-0.0580159	1.04327	0.300369	0.521549	0.00543711	-0.0977344	0.922419	0.999975	0.0162599	-0.290803	0.772051	0.999994	-0.00189163	0.0335858	0.973302	0.99975	black	grey
YTHDC2	0.0849032	-1.09871	0.275612	0.663498	-0.188817	2.36416	0.0208138	0.0877809	-0.0788612	1.02054	0.31094	0.532209	-0.0866092	1.12038	0.266335	0.999975	-0.0642608	0.827078	0.410968	0.999994	-0.0988595	1.26316	0.21067	0.99975	black	grey
ARCN1	-0.0282964	0.371464	0.7114	0.916613	-0.208417	2.64726	0.00999229	0.0547217	-0.0775	1.01741	0.312416	0.53371	0.0476098	-0.624775	0.534124	0.999975	0.091447	-1.19398	0.236466	0.999994	0.0126148	-0.163511	0.870581	0.99975	black	pink
PDE12	-0.0451127	0.657801	0.512796	0.825414	-0.192433	2.7149	0.00831984	0.0488068	-0.0695961	1.01483	0.31364	0.5351	-0.0315984	0.460577	0.646512	0.999975	0.0696586	-1.01021	0.31583	0.999994	0.000945348	-0.0136103	0.989179	0.99975	black	grey
TBCCD1	-0.138156	1.89373	0.0623415	0.366036	-0.335407	4.44834	3.13859e-05	0.00102023	-0.0740024	1.01439	0.313845	0.535288	-0.066956	0.917445	0.36202	0.999975	0.0151761	-0.206895	0.836685	0.999994	0.0993524	-1.34465	0.183025	0.99975	black	black
PSMD5	-0.0776512	0.871577	0.386381	0.748153	-0.203288	2.20774	0.0304995	0.112266	-0.0894411	1.00393	0.318825	0.54019	0.0946702	-1.06221	0.291744	0.999975	0.114701	-1.28046	0.204558	0.999994	0.0806179	-0.89345	0.374639	0.99975	black	grey
ATF2	-0.00930812	0.117212	0.907023	0.975478	-0.237054	2.88825	0.0051337	0.0355538	-0.0775966	0.977155	0.331815	0.553504	-0.00678258	0.0853781	0.932201	0.999975	-0.0835639	1.04658	0.29885	0.999994	-0.123792	1.53916	0.128217	0.99975	black	red
TRIM23	0.021973	-0.259536	0.795974	0.944713	-0.211972	2.4225	0.0179717	0.0797888	-0.0825104	0.974604	0.33307	0.554833	-0.0325948	0.384856	0.701496	0.999975	-0.0509856	0.598961	0.551108	0.999994	-0.0177546	0.207062	0.836555	0.99975	black	blue
S100PBP	-0.068454	0.998599	0.321385	0.701833	-0.232567	3.2826	0.0015985	0.0165651	-0.066406	0.968747	0.335965	0.558227	-0.0848567	1.23743	0.220011	0.999975	-0.0963485	1.39791	0.166499	0.999994	-0.163747	2.35855	0.0211071	0.99975	black	turquoise
BTBD10	0.00133337	-0.0184316	0.985346	0.997301	-0.200639	2.68352	0.00906088	0.0514341	-0.0686667	0.949224	0.345731	0.567897	-0.0363716	0.502592	0.616809	0.999975	-0.0937025	1.28826	0.201843	0.999994	0.0029286	-0.0399718	0.968228	0.99975	black	grey
AC068620.1	-0.170715	0.75193	0.454582	0.791511	-0.60051	2.5592	0.0126265	0.0634414	-0.214949	0.946785	0.346964	0.569105	0.459395	-2.02271	0.046876	0.999975	0.294618	-1.29065	0.20102	0.999994	0.334397	-1.45429	0.15028	0.99975	black	grey
GFM1	0.0708845	-1.14105	0.257691	0.646824	-0.153743	2.39455	0.019287	0.0833339	-0.0587849	0.946298	0.347211	0.569315	-0.0031208	0.0502179	0.96009	0.999975	0.00775768	-0.124201	0.901508	0.999994	-0.0311828	0.495619	0.621696	0.99975	black	grey
AC012313.6	0.0732558	-0.340273	0.734657	0.925412	-0.457355	2.0555	0.0435156	0.140889	-0.203135	0.943584	0.348587	0.570411	0.00653611	-0.0303491	0.975874	0.999975	0.181937	-0.840521	0.403442	0.999994	-0.280413	1.28607	0.202602	0.99975	black	brown
LRPPRC	0.138545	-2.20394	0.0307769	0.275301	-0.0483952	0.744887	0.458802	0.649267	0.0593158	-0.943608	0.348575	0.570411	-0.00644173	0.102436	0.918699	0.999975	-0.0347578	0.549927	0.584098	0.999994	-0.0905517	1.42229	0.159327	0.99975	black	green
TMEM168	0.0492692	-0.56756	0.572127	0.855739	-0.246437	2.74675	0.0076244	0.0459281	-0.0805918	0.928405	0.356348	0.578139	-0.0440631	0.507402	0.613448	0.999975	0.0356347	-0.408273	0.684304	0.999994	0.0488492	-0.555616	0.580222	0.99975	black	turquoise
SHQ1	-0.016761	0.194237	0.846545	0.960084	-0.250269	2.8062	0.00646709	0.0412767	-0.0791535	0.917307	0.362092	0.5836	-0.203695	2.35969	0.0210472	0.999975	-0.0220399	0.25403	0.800208	0.999994	0.0404854	-0.463248	0.644605	0.99975	black	turquoise
TMEM267	-0.107048	1.0356	0.30391	0.689164	-0.225941	2.11487	0.0379572	0.128546	-0.0947928	0.917058	0.362222	0.583753	-0.0583956	0.564718	0.574048	0.999975	-0.0650733	0.626117	0.533249	0.999994	0.0621248	-0.593412	0.554794	0.99975	black	grey
RNGTT	-0.0203921	0.273327	0.785397	0.9412	-0.190442	2.46979	0.0159285	0.0737335	-0.0679485	0.910774	0.365501	0.586749	-0.0767001	1.02768	0.307595	0.999975	-0.0278331	0.371042	0.711713	0.999994	-0.0343515	0.454618	0.650773	0.99975	black	grey
NEMP1	-0.0775357	0.417732	0.677406	0.903441	-0.401944	2.09526	0.0397205	0.132463	-0.168289	0.906695	0.367639	0.588898	0.0818482	-0.440804	0.660696	0.999975	0.0106044	-0.056823	0.954846	0.999994	-0.157525	0.837966	0.404866	0.99975	black	turquoise
INTS2	0.0121509	-0.117252	0.906992	0.975478	-0.307614	2.87207	0.00537474	0.0366944	-0.0937528	0.904701	0.368688	0.590017	-0.0659515	0.636175	0.526711	0.999975	-0.0628732	0.603417	0.548157	0.999994	-0.246681	2.35032	0.0215441	0.99975	black	brown
BACH1	-0.00613955	0.0861924	0.931556	0.982648	-0.143389	1.94772	0.0554083	0.164092	-0.0643359	0.903227	0.369464	0.590605	0.0845812	-1.18699	0.239193	0.999975	0.0865584	-1.2086	0.230831	0.999994	-0.0832641	1.15417	0.252304	0.99975	black	red
ATE1	0.00675972	-0.0806362	0.935959	0.983475	-0.246725	2.84768	0.00575763	0.038263	-0.074859	0.893009	0.374874	0.595361	-0.0121209	0.144537	0.885487	0.999975	-0.0930892	1.10444	0.273137	0.999994	-0.122234	1.43971	0.154352	0.99975	black	brown
PDIK1L	-0.00303951	0.0289389	0.976995	0.995274	-0.200209	1.84433	0.0693133	0.188847	-0.0928078	0.883635	0.37988	0.600681	-0.151192	1.43896	0.154563	0.999975	-0.111264	1.0536	0.295645	0.999994	-0.112812	1.06051	0.292514	0.99975	black	blue
ATL2	0.0524391	-0.565034	0.573834	0.856816	-0.241216	2.5148	0.01418	0.0685253	-0.0801322	0.86345	0.390802	0.611481	-0.0297548	0.320493	0.749537	0.999975	0.0125154	-0.134124	0.893684	0.999994	0.00285775	-0.0304036	0.975831	0.99975	black	turquoise
FDXACB1	0.0851559	-0.696473	0.48841	0.812655	-0.108193	0.856183	0.394781	0.590689	0.105312	-0.861347	0.391951	0.6126	0.0251591	-0.205696	0.837618	0.999975	-0.0770602	0.626847	0.532773	0.999994	0.106823	-0.862652	0.391238	0.99975	black	grey
SENP1	-0.032487	0.354533	0.723992	0.922856	-0.298525	3.15214	0.00237559	0.0216358	-0.0785849	0.857623	0.39399	0.614596	-0.0348751	0.380455	0.704745	0.999975	-0.0801868	0.870345	0.387049	0.999994	-0.0823172	0.88699	0.378083	0.99975	black	turquoise
TTC30A	-0.0193134	0.162258	0.871564	0.965678	-0.19532	1.58772	0.116801	0.266836	-0.101519	0.852917	0.396577	0.616417	-0.0870519	0.731084	0.467137	0.999975	-0.0348578	0.291265	0.771699	0.999994	-0.0274671	0.227846	0.820422	0.99975	black	brown
ZNF20	-0.0600396	0.253403	0.80069	0.946265	-0.25283	1.03248	0.305358	0.502002	-0.19864	0.8384	0.404624	0.623103	-0.0634593	0.267738	0.789678	0.999975	-0.0517272	0.217137	0.828725	0.999994	0.0425403	-0.177278	0.859795	0.99975	black	grey
C5orf22	-0.0423399	0.692966	0.490594	0.814435	-0.19019	3.01181	0.00359759	0.0281246	-0.0511889	0.837817	0.404949	0.623251	0.0224635	-0.36752	0.714326	0.999975	0.0372072	-0.605662	0.546673	0.999994	-0.0114363	0.184812	0.853904	0.99975	black	pink
COPB2	-0.0155752	0.253694	0.800467	0.946265	-0.11894	1.87448	0.0649837	0.181124	-0.0512724	0.835159	0.406434	0.624684	0.050135	-0.816313	0.417055	0.999975	0.0877217	-1.4211	0.159673	0.999994	-0.0174912	0.281304	0.779296	0.99975	black	black
PTK2	0.179839	-2.37811	0.0201	0.226902	-0.029559	0.378195	0.706416	0.833954	0.0624758	-0.826171	0.411479	0.628784	0.0620622	-0.820382	0.414748	0.999975	0.0920401	-1.2105	0.230106	0.999994	-0.066756	0.871604	0.386367	0.99975	black	grey
ZNF260	0.0939686	-1.13057	0.262048	0.650226	-0.0934671	1.08805	0.280258	0.475321	0.0685784	-0.825108	0.412078	0.62939	-0.117519	1.41339	0.161917	0.999975	0.0145648	-0.174284	0.862139	0.999994	-0.0410771	0.48797	0.627077	0.99975	black	brown
PCMTD2	0.0677754	-0.800715	0.425972	0.774507	-0.149745	1.71173	0.0913184	0.225473	-0.0696792	0.823227	0.41314	0.630446	-0.0275845	0.325771	0.745557	0.999975	-0.0130415	0.153241	0.878643	0.999994	-0.0518902	0.605302	0.546911	0.99975	black	brown
TTC26	0.0649047	-0.58248	0.562091	0.849932	-0.288241	2.50287	0.0146256	0.0699789	-0.0915647	0.821757	0.41397	0.631169	0.0053503	-0.0479981	0.961853	0.999975	-0.0301688	0.26928	0.788497	0.999994	-0.112421	0.996166	0.322557	0.99975	black	green
HACE1	0.0041049	-0.0405847	0.967741	0.992055	-0.199422	1.9077	0.0604806	0.173447	-0.0820327	0.811068	0.420041	0.636364	0.0501618	-0.495764	0.621594	0.999975	-0.0381498	0.37514	0.708676	0.999994	-0.0845429	0.825313	0.411963	0.99975	black	turquoise
PRMT9	0.204787	-2.23235	0.0287524	0.265466	-0.128648	1.35688	0.179125	0.354896	0.0739636	-0.806282	0.422777	0.638501	-0.0142607	0.155396	0.87695	0.999975	-0.0481674	0.52222	0.603145	0.999994	-0.0889354	0.957226	0.341706	0.99975	black	turquoise
ZNF41	0.224067	-2.05542	0.0435232	0.315758	-0.124815	1.10782	0.271686	0.466057	0.0878937	-0.806291	0.422771	0.638501	-0.0514362	0.471665	0.638615	0.999975	0.0518141	-0.47273	0.637858	0.999994	-0.169228	1.53277	0.129782	0.99975	black	brown
ARRDC3	0.0272451	-0.200945	0.841317	0.958489	-0.163369	1.16583	0.247592	0.439597	-0.109059	0.804378	0.423868	0.639635	0.276793	-2.04072	0.0450031	0.999975	-0.00532032	0.0390272	0.968978	0.999994	-0.375035	2.73112	0.00795864	0.99975	black	lightcyan
PPP2R1B	-0.0167513	0.171683	0.864176	0.964455	-0.316638	3.13992	0.00246418	0.0222776	-0.0777282	0.796649	0.428315	0.643487	0.043642	-0.44712	0.656152	0.999975	0.0813084	-0.828809	0.409994	0.999994	-0.052912	0.535442	0.59402	0.99975	black	black
CREBL2	-0.0193774	0.252874	0.801097	0.946529	-0.136511	1.72367	0.0891262	0.221578	-0.0608605	0.794244	0.429704	0.644602	-0.00953793	0.124424	0.901332	0.999975	0.00632789	-0.0821313	0.934774	0.999994	0.0494649	-0.637363	0.525941	0.99975	black	turquoise
SLC35B3	-0.106591	1.04351	0.300256	0.685893	-0.200308	1.89738	0.0618512	0.175844	-0.0810742	0.793726	0.430003	0.644872	-0.0731308	0.715681	0.476539	0.999975	-0.101042	0.983828	0.328546	0.999994	0.0140657	-0.135963	0.892236	0.99975	black	turquoise
ZNF548	-0.00214574	0.0271614	0.978407	0.995638	-0.262675	3.21714	0.00195246	0.0189897	-0.0624916	0.791055	0.43155	0.64599	-0.0597329	0.755838	0.45225	0.999975	-0.0787566	0.991523	0.324802	0.999994	-0.0997132	1.24626	0.216772	0.99975	black	brown
MKLN1	-0.0408485	0.45434	0.650972	0.891927	-0.175361	1.88719	0.0632287	0.178399	-0.0705542	0.784762	0.435208	0.648712	0.0338548	-0.376414	0.707733	0.999975	0.0731594	-0.809312	0.421043	0.999994	-0.0581518	0.63863	0.525121	0.99975	black	black
AC245060.4	0.0105334	-0.0571567	0.954581	0.988597	-0.592446	3.11046	0.00269056	0.0235342	-0.14451	0.784166	0.435555	0.649015	-0.350037	1.89869	0.0616755	0.999975	-0.151277	0.816418	0.416996	0.999994	-0.0671066	0.359538	0.720262	0.99975	black	purple
IPO11	0.0301973	-0.252789	0.801162	0.946529	-0.337007	2.72965	0.0079909	0.0474636	-0.0931594	0.77988	0.438058	0.650894	0.0940529	-0.787053	0.433874	0.999975	0.0207749	-0.17297	0.863168	0.999994	-0.0876453	0.724436	0.471182	0.99975	black	green
PHTF2	-0.0756916	0.797678	0.427721	0.775356	-0.29713	3.02973	0.00341414	0.0273282	-0.0738524	0.778315	0.438973	0.651744	-0.0777298	0.818859	0.415611	0.999975	-0.0246136	0.257987	0.797165	0.999994	0.00283322	-0.029481	0.976564	0.99975	black	salmon
C12orf4	0.0199075	-0.257477	0.797556	0.945531	-0.272809	3.41396	0.00106224	0.0125694	-0.0590644	0.763939	0.447438	0.65914	0.0289583	-0.374401	0.709224	0.999975	0.0792534	-1.01949	0.311438	0.999994	0.0370387	-0.472998	0.637667	0.99975	black	purple
ZNF155	-0.234019	1.85204	0.0681831	0.379422	-0.315207	2.41365	0.0183795	0.0807734	-0.0949818	0.751712	0.454712	0.665009	-0.202339	1.60074	0.113881	0.999975	-0.0513891	0.404495	0.687067	0.999994	-0.163934	1.281	0.204367	0.99975	black	grey
RELCH	0.00495225	-0.0618204	0.95088	0.987557	-0.240916	2.90987	0.00482738	0.0342303	-0.0601835	0.751307	0.454954	0.665033	-0.0957898	1.19534	0.235939	0.999975	-0.0367566	0.456358	0.649527	0.999994	-0.0958348	1.18123	0.241459	0.99975	black	grey
YTHDF3	0.0282883	-0.383717	0.702337	0.913637	-0.213222	2.79842	0.00660875	0.0418496	-0.0537145	0.728628	0.468629	0.677536	0.0220373	-0.298815	0.765956	0.999975	0.0150453	-0.202977	0.839735	0.999994	-0.0550072	0.736722	0.463722	0.99975	black	grey
ZNF449	0.0629415	-0.474748	0.636426	0.88558	-0.273832	1.99842	0.0495066	0.153113	-0.0964701	0.727662	0.469217	0.67818	0.0782812	-0.590235	0.55691	0.999975	-0.051422	0.38576	0.70083	0.999994	-0.151848	1.13088	0.261916	0.99975	black	green
FCHO2	-0.0154051	0.127154	0.899178	0.97436	-0.19858	1.58592	0.117207	0.267572	0.08621	-0.7116	0.479047	0.687102	-0.0183043	0.15103	0.880381	0.999975	0.0130498	-0.10713	0.914988	0.999994	-0.114444	0.932704	0.354139	0.99975	black	blue
USP38	-0.0291237	0.399904	0.69043	0.908889	-0.161155	2.14107	0.0357079	0.124069	-0.0517663	0.710832	0.47952	0.687238	0.146733	-2.01408	0.0477961	0.999975	0.117061	-1.59868	0.114339	0.999994	0.0242445	-0.328704	0.743349	0.99975	black	brown
HS2ST1	0.0560559	-0.650974	0.517168	0.827635	-0.0423607	0.475974	0.635556	0.787781	0.0611904	-0.710618	0.479652	0.687283	-0.0204904	0.237867	0.812671	0.999975	-0.0234193	0.270494	0.787566	0.999994	-0.078065	0.895118	0.373753	0.99975	black	brown
TRAPPC11	0.060937	-0.69205	0.491167	0.814506	-0.235692	2.58987	0.0116449	0.06019	-0.0600898	0.682446	0.497181	0.700578	0.0621114	-0.70513	0.48304	0.999975	0.011721	-0.132392	0.895049	0.999994	-0.150274	1.68509	0.0963692	0.99975	black	grey
TRNT1	-0.0100683	0.13135	0.89587	0.973482	-0.144106	1.81901	0.0731324	0.194939	-0.0522973	0.682285	0.497282	0.700655	-0.0902169	1.17654	0.243316	0.999975	0.0189269	-0.245582	0.806715	0.999994	0.0358966	-0.462392	0.645216	0.99975	black	black
KLHL24	-0.0222546	0.209135	0.834942	0.955817	-0.159551	1.45072	0.151267	0.317124	-0.0716255	0.67311	0.503065	0.706043	0.0508931	-0.478089	0.634058	0.999975	-0.0775908	0.725204	0.470714	0.999994	-0.18514	1.71787	0.0901861	0.99975	black	brown
FBXO34	0.0464809	-0.758948	0.4504	0.789558	-0.0886494	1.40053	0.165718	0.336772	0.0411753	-0.672334	0.503556	0.706146	-0.0441825	0.721155	0.473185	0.999975	-0.0721317	1.1714	0.24536	0.999994	-0.0709333	1.14359	0.256642	0.99975	black	blue
ZNF547	-0.0856112	0.650896	0.517218	0.827636	-0.405014	2.9794	0.00395287	0.0301369	-0.0874663	0.665016	0.508198	0.709947	-0.333967	2.5382	0.013341	0.999975	-0.0806037	0.609505	0.544138	0.999994	-0.223115	1.67491	0.0983585	0.99975	black	grey
PTBP3	-0.0114087	0.128825	0.897861	0.974229	-0.104477	1.14147	0.257516	0.450885	-0.0588346	0.664368	0.50861	0.710058	0.0770562	-0.869789	0.387351	0.999975	0.132255	-1.48531	0.141894	0.999994	-0.057947	0.646067	0.520322	0.99975	black	green
FAM91A1	0.0221064	-0.23889	0.81188	0.950415	-0.213284	2.23005	0.0289114	0.108357	-0.0606482	0.655402	0.51433	0.714896	0.1037	-1.12021	0.266404	0.999975	0.162838	-1.75015	0.0844181	0.999994	-0.044074	0.470265	0.639609	0.99975	black	brown
ZNF614	0.0724197	-0.711105	0.479352	0.806498	-0.251323	2.38774	0.0196201	0.0843643	-0.0666991	0.654949	0.51462	0.715087	-0.0150566	0.14779	0.882928	0.999975	-0.0382712	0.373758	0.7097	0.999994	-0.0853675	0.827658	0.410641	0.99975	black	brown
PIGA	-0.0508759	0.432682	0.666559	0.897826	-0.245551	2.02058	0.0471021	0.148222	-0.0767974	0.653152	0.515771	0.715927	0.186875	-1.58873	0.116572	0.999975	0.0406734	-0.34404	0.731835	0.999994	-0.10829	0.90934	0.366252	0.99975	black	cyan
NXPE3	0.00218685	-0.0274757	0.978158	0.995561	-0.0916226	1.11381	0.269124	0.463589	-0.0518647	0.651646	0.516736	0.716735	0.158621	-1.9922	0.0502013	0.999975	0.0741264	-0.926284	0.357441	0.999994	-0.0265916	0.32988	0.742464	0.99975	black	black
TMEM184C	0.118595	-1.95009	0.0551205	0.347998	0.00486013	-0.077324	0.938584	0.96891	0.0395483	-0.65032	0.517587	0.716975	-0.0287322	0.472279	0.638178	0.999975	0.0747444	-1.22239	0.225609	0.999994	0.00390544	-0.0634074	0.949621	0.99975	black	grey
C1orf115	0.166012	-0.653524	0.515532	0.826658	-0.0274499	0.104554	0.917025	0.957867	0.164776	-0.648675	0.518644	0.717793	-0.185858	0.731382	0.466957	0.999975	-0.37745	1.47782	0.143884	0.999994	-0.335558	1.30428	0.196356	0.99975	black	green
TMED8	-0.0408626	0.621994	0.535941	0.835488	-0.177639	2.61622	0.0108575	0.0573722	-0.0425863	0.648246	0.51892	0.71794	-0.129852	1.97583	0.0520663	0.999975	-0.124886	1.89067	0.0627547	0.999994	-0.130139	1.9559	0.0544173	0.99975	black	red
PRRC1	-0.0641264	1.05494	0.295034	0.680815	-0.208087	3.31218	0.00145919	0.0156859	-0.0390722	0.642791	0.522433	0.720414	0.0453419	-0.745645	0.458347	0.999975	0.0377212	-0.617188	0.539088	0.999994	0.0421431	-0.68454	0.495866	0.99975	black	pink
ZUP1	0.0548282	-0.732042	0.466556	0.798222	-0.10654	1.37633	0.173051	0.346696	-0.0471023	0.628904	0.531433	0.72776	0.0442773	-0.590955	0.55643	0.999975	0.0060233	-0.0799849	0.936475	0.999994	-0.00078186	0.0103072	0.991805	0.99975	black	grey
HIF1A	0.0570483	-0.621904	0.536	0.835488	-0.0728146	0.768027	0.445022	0.637256	0.0568446	-0.619698	0.537443	0.732967	0.0630609	-0.687198	0.4942	0.999975	0.0944921	-1.02451	0.309076	0.999994	0.094426	-1.01637	0.312907	0.99975	black	pink
ACTR2	0.0951597	-1.56197	0.122747	0.477241	-0.0460778	0.731796	0.466705	0.65561	-0.0376831	0.618555	0.538192	0.733752	0.0495626	-0.813235	0.418806	0.999975	0.0544648	-0.889156	0.376926	0.999994	-0.0150099	0.243265	0.808502	0.99975	black	grey
SOCS6	0.0129875	-0.157352	0.875415	0.966193	-0.187847	2.20206	0.0309152	0.112942	-0.0506201	0.613311	0.541634	0.736902	0.0725316	-0.878446	0.382669	0.999975	0.0806172	-0.97144	0.334632	0.999994	-0.0152635	0.182592	0.85564	0.99975	black	red
AC113191.1	-0.142618	1.03786	0.302861	0.688291	-0.423066	2.97886	0.00395908	0.0301603	0.0839761	-0.611126	0.543071	0.738205	-0.260026	1.89157	0.0626333	0.999975	-0.224143	1.6223	0.109177	0.999994	-0.389378	2.7978	0.00662016	0.99975	black	grey
CANX	0.0207983	-0.309794	0.757626	0.933485	-0.132363	1.90762	0.0604914	0.173447	-0.0404491	0.602512	0.548756	0.742039	0.100631	-1.49836	0.138478	0.999975	0.0745826	-1.1049	0.272936	0.999994	-0.0568118	0.835537	0.406223	0.99975	black	grey
GDAP1	0.09567	-1.29113	0.200853	0.582765	-0.101119	1.3204	0.190947	0.369944	-0.0446459	0.60254	0.548737	0.742039	-0.0496288	0.669529	0.505333	0.999975	-0.0394596	0.529649	0.59801	0.999994	-0.016681	0.222279	0.824736	0.99975	black	blue
MTX3	-0.0611911	0.680737	0.498255	0.816506	-0.205213	2.20889	0.0304157	0.112127	-0.0541244	0.602135	0.549005	0.742189	0.0202818	-0.225548	0.822202	0.999975	0.0748934	-0.828659	0.410078	0.999994	-0.0207633	0.22807	0.820248	0.99975	black	brown
DCAF17	0.00178383	-0.0173964	0.986169	0.997301	-0.18904	1.78376	0.0787423	0.204878	-0.0600272	0.585413	0.560129	0.750309	-0.0176582	0.172144	0.863815	0.999975	-0.0148111	0.143659	0.886177	0.999994	-0.13508	1.3007	0.197574	0.99975	black	grey
STAM	0.0935911	-1.76065	0.0826103	0.409095	-0.0398133	0.724676	0.471036	0.659614	-0.031121	0.585467	0.560093	0.750309	-0.0320817	0.603305	0.548231	0.999975	-0.0282082	0.527783	0.599298	0.999994	0.00828559	-0.153901	0.878125	0.99975	black	blue
CSE1L	-0.0068229	0.110239	0.912531	0.977884	-0.190345	2.97567	0.00399572	0.030364	-0.0361252	0.583696	0.561277	0.751156	0.019602	-0.316597	0.752479	0.999975	0.0279488	-0.449129	0.654709	0.999994	0.0061354	-0.0978791	0.922305	0.99975	black	turquoise
PHKB	0.022491	-0.248261	0.80465	0.947617	-0.223367	2.3856	0.0197262	0.0847258	-0.0507836	0.560576	0.576854	0.763237	0.0139229	-0.153629	0.878339	0.999975	0.0270741	-0.297232	0.767159	0.999994	-0.110978	1.20954	0.230474	0.99975	black	turquoise
ORC3	0.0747821	-1.74861	0.0846868	0.412303	-0.0289225	0.654349	0.515004	0.695586	0.0237523	-0.555408	0.580364	0.765807	0.0132435	-0.309555	0.757807	0.999975	-0.0065055	0.151293	0.880175	0.999994	-0.00955305	0.220556	0.826072	0.99975	black	brown
NCBP1	-0.0214765	0.298361	0.766301	0.936362	-0.229812	3.08908	0.00286678	0.0244724	-0.0398784	0.554022	0.581307	0.766371	0.0576244	-0.800251	0.426239	0.999975	0.0786599	-1.08686	0.28078	0.999994	-0.0429535	0.589195	0.557603	0.99975	black	grey
CLTC	0.0458872	-0.582611	0.562004	0.849932	-0.103958	1.2771	0.205734	0.388892	0.043328	-0.550132	0.583958	0.767655	0.0614216	-0.779561	0.438244	0.999975	0.0250934	-0.316876	0.752269	0.999994	-0.0979175	1.22752	0.223687	0.99975	black	black
POLR2B	0.102167	-2.05884	0.0431844	0.314107	-0.130988	2.554	0.0128002	0.0640122	-0.0265469	0.534977	0.59434	0.774341	-0.0284661	0.573431	0.568167	0.999975	-0.0324427	0.650235	0.517642	0.999994	-0.0577752	1.14957	0.254186	0.99975	black	grey
ASAH2B	0.116915	-1.03458	0.30438	0.68933	-0.036315	0.310927	0.756769	0.864077	0.060266	-0.533307	0.595489	0.774992	-0.0129309	0.114383	0.909257	0.999975	-0.00483772	0.0425771	0.966158	0.999994	-0.0308314	0.269382	0.788418	0.99975	black	blue
HSPA4	0.12227	-2.09586	0.0396661	0.303938	-0.0167559	0.277899	0.781898	0.880008	0.0309963	-0.531329	0.596852	0.775597	-0.0113484	0.194455	0.846376	0.999975	-0.00391074	0.0666721	0.94703	0.999994	-0.0756589	1.28051	0.204538	0.99975	black	grey
POLR1B	0.0146965	-0.228184	0.82016	0.951952	-0.114537	1.72066	0.0896743	0.222386	-0.0341531	0.530288	0.59757	0.775851	-0.0616341	0.956606	0.342017	0.999975	-0.0239023	0.369107	0.713148	0.999994	-0.118182	1.81177	0.0742563	0.99975	black	brown
ATP2C1	-0.0502146	0.773771	0.441639	0.783563	-0.157441	2.34735	0.0217041	0.0901436	-0.0343857	0.529872	0.597856	0.775921	0.0342102	-0.526961	0.599865	0.999975	-0.0324831	0.49783	0.620145	0.999994	-0.0286923	0.436546	0.663768	0.99975	black	grey
HSPBAP1	-0.0301445	0.326488	0.745017	0.929213	-0.157719	1.6528	0.102793	0.244341	-0.0482556	0.522658	0.602842	0.77929	0.0378662	-0.40997	0.683064	0.999975	-0.0752887	0.811017	0.42007	0.999994	-0.125804	1.34535	0.182801	0.99975	black	grey
PIGN	-0.0586912	0.55709	0.57922	0.859064	-0.276343	2.53792	0.0133505	0.0659078	-0.0543871	0.516249	0.607287	0.782793	0.0196338	-0.186294	0.852746	0.999975	0.0541988	-0.511663	0.610477	0.999994	-0.0500278	0.468863	0.640606	0.99975	black	brown
ZNF420	0.0376288	-0.544135	0.588056	0.863322	-0.123329	1.72555	0.0887843	0.221119	0.0356074	-0.514916	0.608213	0.783361	-0.0600913	0.868638	0.387976	0.999975	-0.0639276	0.919425	0.360991	0.999994	0.00128104	-0.0182907	0.985458	0.99975	black	red
NAPB	0.049503	-0.239029	0.811773	0.950415	-0.123921	0.578951	0.564457	0.735082	-0.106661	0.515034	0.608131	0.783361	-0.21946	1.05929	0.293063	0.999975	-0.29678	1.42526	0.158469	0.999994	-0.214938	1.02474	0.308969	0.99975	black	blue
DPY19L2P2	-0.0539136	0.299429	0.765489	0.936086	-0.187024	1.00501	0.31831	0.515735	-0.0912721	0.506925	0.613781	0.786823	-0.149793	0.831628	0.408411	0.999975	-0.126916	0.701054	0.485564	0.999994	-0.0277921	0.152405	0.879301	0.99975	black	blue
SMARCAD1	0.0769445	-0.970274	0.335209	0.711525	-0.12352	1.50706	0.136237	0.295856	-0.0401873	0.506776	0.613884	0.786896	-0.0560814	0.706931	0.481926	0.999975	0.00767459	-0.0962529	0.923591	0.999994	0.0586258	-0.72994	0.467832	0.99975	black	red
HEATR5B	-0.0148167	0.163799	0.870356	0.965678	-0.217321	2.32455	0.0229652	0.093518	0.045341	-0.501259	0.617742	0.789094	0.0157603	-0.174167	0.86223	0.999975	-0.0174865	0.192266	0.848083	0.999994	-0.119475	1.30412	0.196411	0.99975	black	red
SEL1L	0.0507115	-0.618858	0.537993	0.836456	-0.203465	2.40243	0.0189078	0.0823751	-0.0400662	0.48896	0.626379	0.794255	0.090733	-1.10686	0.272098	0.999975	0.0429257	-0.521007	0.603986	0.999994	-0.0736014	0.886854	0.378156	0.99975	black	grey
PIK3R4	0.0185328	-0.155498	0.876871	0.966193	-0.300339	2.43822	0.0172681	0.0777474	-0.0579128	0.485924	0.628519	0.796075	0.0630982	-0.529226	0.598302	0.999975	0.0336347	-0.280681	0.779773	0.999994	-0.140249	1.16188	0.249179	0.99975	black	green
MMAA	0.0137085	-0.135978	0.892224	0.97239	-0.179616	1.72386	0.0890912	0.221524	-0.0479409	0.475551	0.635856	0.801229	-0.116861	1.15876	0.250443	0.999975	-0.0925446	0.913005	0.364334	0.999994	-0.16589	1.62473	0.108658	0.99975	black	lightcyan
NRDC	-0.0259187	0.487705	0.627264	0.88129	-0.161173	2.93437	0.00450063	0.0328021	-0.0252642	0.475401	0.635962	0.801246	0.0165159	-0.310662	0.756969	0.999975	0.025933	-0.485332	0.628937	0.999994	-0.039679	0.737202	0.463433	0.99975	black	turquoise
ECT2	-0.122445	0.795231	0.429134	0.77656	-0.446995	2.80888	0.00641901	0.0410783	-0.0725502	0.471196	0.638947	0.803155	0.0390602	-0.253588	0.800548	0.999975	0.013334	-0.0861297	0.931606	0.999994	-0.07927	0.508326	0.612803	0.99975	black	turquoise
RLIM	0.0170985	-0.241693	0.809716	0.94974	-0.0766696	1.04859	0.297928	0.494396	0.0332726	-0.470329	0.639564	0.803571	-0.0143494	0.202759	0.839904	0.999975	-0.0191529	0.269265	0.788508	0.999994	-0.0710623	0.991803	0.324667	0.99975	black	green
IRAK4	0.0719487	-0.473377	0.637399	0.885628	-0.166705	1.06123	0.292187	0.488107	-0.0713995	0.469775	0.639958	0.803768	0.0391788	-0.257677	0.797402	0.999975	0.0481534	-0.315103	0.753609	0.999994	0.0177406	-0.115248	0.908575	0.99975	black	turquoise
MTMR7	0.0798791	-0.442551	0.659438	0.895489	-0.131968	0.707418	0.481626	0.667427	-0.0840813	0.465843	0.642756	0.805908	-0.073416	0.406595	0.685531	0.999975	-0.0929751	0.512316	0.610022	0.999994	-0.0766368	0.419226	0.676318	0.99975	black	blue
HERC4	-0.0581256	0.548346	0.585177	0.862035	-0.189415	1.72894	0.0881731	0.220215	-0.0493031	0.465128	0.643266	0.806329	0.0905403	-0.853828	0.396076	0.999975	0.077107	-0.723473	0.47177	0.999994	-0.0154542	0.143951	0.885947	0.99975	black	pink
CLASP2	0.0441973	-0.292723	0.770589	0.937354	-0.179221	1.14849	0.254626	0.447492	-0.0699979	0.463614	0.644344	0.80712	-0.0918327	0.607995	0.545134	0.999975	-0.213477	1.40622	0.164026	0.999994	-0.195937	1.28132	0.204255	0.99975	black	blue
AP1G1	0.051376	-0.793895	0.429906	0.776962	-0.0745504	1.11463	0.268774	0.463393	-0.0299678	0.463092	0.644717	0.807149	0.00102274	-0.0157982	0.98744	0.999975	0.00846248	-0.13006	0.896888	0.999994	-0.0669901	1.0221	0.310207	0.99975	black	green
AJ003147.2	0.0621841	-0.175172	0.861444	0.964201	-0.654152	1.78296	0.0788738	0.205062	0.163074	-0.459388	0.647361	0.808449	-0.175989	0.495578	0.621725	0.999975	-0.479997	1.34482	0.18297	0.999994	-0.282145	0.784764	0.435206	0.99975	black	red
DDX3Y	0.15111	-1.56865	0.121183	0.475217	-0.165247	1.65975	0.101381	0.24206	0.0442451	-0.459313	0.647415	0.808457	0.0913086	-0.947513	0.346596	0.999975	-0.052869	0.545853	0.586881	0.999994	-0.125519	1.28654	0.202441	0.99975	black	grey
PPP2R5C	0.00337405	-0.0817326	0.93509	0.983475	-0.12432	2.91381	0.00477339	0.0340184	-0.0187058	0.453137	0.651834	0.811641	-0.0481362	1.16562	0.247675	0.999975	-0.0105001	0.252976	0.801019	0.999994	0.0376913	-0.9015	0.370375	0.99975	black	grey
RNF6	0.126923	-1.51825	0.133399	0.492983	-0.128228	1.4841	0.142216	0.304176	0.037657	-0.450462	0.653752	0.812627	0.0287514	-0.343797	0.732017	0.999975	0.0548217	-0.652223	0.516366	0.999994	-0.0129748	0.153244	0.878641	0.99975	black	grey
ZNF654	-0.00335351	0.0314768	0.974978	0.994605	-0.193742	1.75952	0.0828039	0.211406	0.0476661	-0.447416	0.655939	0.813832	0.081791	-0.767428	0.445375	0.999975	-0.0209153	0.195253	0.845753	0.999994	-0.13452	1.24669	0.216615	0.99975	black	lightcyan
TBC1D15	0.0273531	-0.306634	0.76002	0.933981	-0.157633	1.70977	0.0916815	0.22581	-0.0394874	0.442673	0.65935	0.816127	0.0533178	-0.597486	0.552087	0.999975	0.0254584	-0.283848	0.777354	0.999994	-0.00737006	0.0815767	0.935213	0.99975	black	green
LRRC8C	-0.0876371	0.408493	0.684143	0.906179	-0.281387	1.26905	0.208573	0.392158	0.0927077	-0.432139	0.666952	0.820841	0.0493306	-0.229856	0.818866	0.999975	0.0739912	-0.34302	0.732599	0.999994	-0.226722	1.04345	0.300285	0.99975	black	green
MTREX	0.0839962	-1.39536	0.167261	0.53896	-0.0997896	1.60395	0.113171	0.261044	-0.0251919	0.418504	0.676844	0.827355	0.0014391	-0.023898	0.981001	0.999975	0.0614421	-1.01516	0.31348	0.999994	-0.0183887	0.30162	0.763824	0.99975	black	grey
KPNA1	0.0234523	-0.337944	0.736404	0.926139	-0.133417	1.86015	0.0670121	0.185048	-0.0288733	0.41607	0.678615	0.828508	-0.0657803	0.947538	0.346583	0.999975	-0.00204249	0.0292726	0.976729	0.999994	-0.0538082	0.765578	0.446469	0.99975	black	brown
PALB2	0.110972	-1.17797	0.242748	0.629531	-0.0791571	0.812993	0.418944	0.614294	0.0391604	-0.415697	0.678887	0.828719	-0.0256782	0.272474	0.78605	0.999975	-0.0180789	0.190868	0.849174	0.999994	-0.103282	1.0825	0.2827	0.99975	black	grey
ERCC6	0.0652522	-0.736889	0.463622	0.797097	-0.101715	1.11139	0.270154	0.464579	0.0361012	-0.407698	0.684724	0.832933	-0.0422832	0.477327	0.634598	0.999975	-0.022456	0.252221	0.8016	0.999994	-0.111633	1.24475	0.217324	0.99975	black	brown
TP53INP1	0.0307082	-0.247294	0.805396	0.947889	-0.195621	1.52423	0.131899	0.289456	0.0497417	-0.400581	0.689933	0.836487	-0.0729913	0.587586	0.558677	0.999975	-0.0134273	0.107545	0.91466	0.999994	-0.154861	1.23136	0.222259	0.99975	black	green
C9orf64	0.000307773	-0.00105409	0.999162	0.999801	-0.399094	1.32252	0.190246	0.369189	-0.115952	0.397136	0.69246	0.838309	-0.300995	1.0305	0.306276	0.999975	-0.0818663	0.278866	0.781159	0.999994	0.0572397	-0.193565	0.84707	0.99975	black	turquoise
SEC24A	0.011384	-0.125599	0.900405	0.97436	-0.0928051	0.9907	0.325201	0.522884	0.0357864	-0.39484	0.694147	0.83987	0.061093	-0.673792	0.502635	0.999975	0.102457	-1.12429	0.264684	0.999994	-0.0764335	0.832641	0.407844	0.99975	black	grey
WDR47	-0.00793799	0.089458	0.92897	0.981959	-0.177167	1.93183	0.0573777	0.167744	-0.0348461	0.392711	0.695711	0.840691	-0.0155554	0.175239	0.861391	0.999975	-0.0519999	0.582844	0.561847	0.999994	-0.0711002	0.791153	0.431493	0.99975	black	blue
FEM1C	-0.0492141	0.655377	0.514346	0.825772	-0.137332	1.7695	0.0811104	0.208825	-0.0292869	0.390019	0.697692	0.842174	0.0537161	-0.715069	0.476914	0.999975	-0.040739	0.539578	0.591179	0.999994	-0.0842586	1.10789	0.271653	0.99975	black	blue
ABITRAM	0.0896624	-1.29214	0.200505	0.582159	-0.0752602	1.0494	0.297558	0.493926	0.0269929	-0.389008	0.698436	0.842539	-0.0281332	0.405284	0.686489	0.999975	-0.0262664	0.37648	0.707685	0.999994	-0.0178981	0.254675	0.799711	0.99975	black	green
GFPT1	0.0367876	-0.491699	0.624451	0.880023	-0.0671414	0.868292	0.388164	0.584168	-0.0287696	0.38454	0.701729	0.844879	-0.0521058	0.696187	0.488588	0.999975	-0.046371	0.616433	0.539583	0.999994	-0.0976419	1.28859	0.201729	0.99975	black	grey
KLHL15	-0.0294688	0.261465	0.794492	0.944289	-0.0966029	0.829314	0.40971	0.606001	-0.0426421	0.378356	0.706297	0.848087	-0.0650786	0.577206	0.565629	0.999975	-0.107416	0.947901	0.3464	0.999994	-0.182714	1.60067	0.113896	0.99975	black	green
SAMD8	0.175646	-2.24072	0.0281783	0.263179	-0.00886355	0.109405	0.913191	0.955453	0.0296502	-0.378258	0.70637	0.848107	0.0566192	-0.72203	0.472651	0.999975	0.0568558	-0.721383	0.473046	0.999994	-0.0472199	0.59478	0.553884	0.99975	black	grey
ICE2	0.0699781	-0.822071	0.413793	0.766771	-0.0785357	0.892671	0.375053	0.572193	-0.0321247	0.377396	0.707007	0.84845	-0.0148746	0.174676	0.861832	0.999975	0.0712577	-0.83257	0.407883	0.999994	-0.0336873	0.390746	0.697156	0.99975	black	green
FIGNL1	0.0854743	-0.749829	0.455839	0.791885	-0.243094	2.06337	0.0427401	0.138997	0.0426654	-0.374294	0.709303	0.849888	-0.180845	1.58589	0.117215	0.999975	-0.0508284	0.443481	0.658769	0.999994	-0.078749	0.682108	0.497393	0.99975	black	grey
BBS10	-0.0206698	0.208267	0.835618	0.956183	-0.226222	2.20545	0.0306662	0.112469	-0.037071	0.373534	0.709866	0.850262	0.0514369	-0.518084	0.606012	0.999975	0.0118431	-0.118684	0.905862	0.999994	-0.135792	1.35095	0.181007	0.99975	black	brown
ZNF268	0.136022	-1.2015	0.233554	0.619819	-0.0392449	0.33541	0.738306	0.853484	0.0421704	-0.372507	0.710627	0.850705	-0.00932983	0.0823816	0.934575	0.999975	0.0209974	-0.184469	0.854172	0.999994	-0.14084	1.22835	0.223377	0.99975	black	brown
ZBTB33	-0.0242246	0.23901	0.811787	0.950415	-0.25276	2.41293	0.0184128	0.080857	-0.0376553	0.371531	0.71135	0.851112	0.00756702	-0.0746321	0.940718	0.999975	0.0212151	-0.208183	0.835683	0.999994	-0.146613	1.42828	0.157603	0.99975	black	brown
HIPK3	0.0398573	-0.496196	0.621291	0.878595	-0.0770417	0.928001	0.356555	0.553034	0.0297889	-0.37086	0.711848	0.851112	0.0889962	-1.10754	0.271806	0.999975	0.0298512	-0.369614	0.712772	0.999994	-0.0423143	0.520132	0.604592	0.99975	black	grey
CPSF6	0.0333522	-0.591928	0.555782	0.846685	-0.0970214	1.66606	0.100115	0.239858	-0.0204551	0.363042	0.717654	0.855135	-0.075562	1.34057	0.18434	0.999975	-0.0361096	0.637395	0.525921	0.999994	0.00936961	-0.16419	0.870049	0.99975	black	red
SNX13	0.0260155	-0.324678	0.746381	0.929311	-0.19793	2.39006	0.0195061	0.0839807	-0.0289447	0.361244	0.718991	0.855865	-0.0245509	0.306287	0.760284	0.999975	0.0276118	-0.342733	0.732813	0.999994	-0.014519	0.178912	0.858517	0.99975	black	green
RBL2	0.026314	-0.269536	0.7883	0.942032	-0.238249	2.36123	0.0209669	0.0882287	0.0350411	-0.358936	0.72071	0.856285	0.0274641	-0.281213	0.779366	0.999975	0.045433	-0.462852	0.644888	0.999994	-0.129167	1.30636	0.195654	0.99975	black	brown
AP3M1	0.0900622	-1.38015	0.171878	0.545802	-0.113785	1.68712	0.0959762	0.232999	0.023477	-0.359779	0.720082	0.856285	0.0481889	-0.738195	0.462832	0.999975	0.0758568	-1.15616	0.251496	0.999994	-0.0215622	0.326255	0.745193	0.99975	black	grey
NUDT21	0.0988139	-0.944609	0.348067	0.722016	-0.15123	1.39878	0.166239	0.337522	-0.037106	0.354722	0.723851	0.85767	-0.0655412	0.62631	0.533123	0.999975	-0.118003	1.12194	0.265675	0.999994	-0.109092	1.0297	0.306653	0.99975	black	blue
GORASP2	0.00259721	-0.048053	0.961809	0.990641	-0.0755097	1.35174	0.180755	0.356574	-0.0189978	0.351502	0.726254	0.859135	-0.0186201	0.344379	0.731581	0.999975	0.0314542	-0.578805	0.564555	0.999994	0.076079	-1.38982	0.168932	0.99975	black	greenyellow
FOXJ3	-0.0163446	0.253439	0.800663	0.946265	-0.134656	2.02024	0.0471381	0.14828	-0.0225204	0.34921	0.727967	0.8602	-0.0416228	0.645167	0.520901	0.999975	-0.10413	1.60589	0.112744	0.999994	-0.159896	2.44803	0.0168412	0.99975	black	blue
MED23	0.0244736	-0.320554	0.749492	0.930513	-0.191518	2.42711	0.017763	0.0792571	-0.026181	0.342926	0.732669	0.862884	-0.0699762	0.916208	0.362664	0.999975	-0.0473559	0.616904	0.539274	0.999994	-0.136183	1.7612	0.0825166	0.99975	black	green
PPAT	0.0415434	-0.580571	0.56337	0.850834	-0.107427	1.45259	0.150749	0.316311	0.0242711	-0.339198	0.735463	0.864133	0.072388	-1.01126	0.315332	0.999975	0.014226	-0.197732	0.84382	0.999994	-0.0550035	0.758972	0.450385	0.99975	black	grey
ZNF468	0.0441411	-0.512892	0.609621	0.872842	-0.178218	2.00361	0.0489349	0.152188	-0.0289124	0.335952	0.737899	0.866122	0.0515393	-0.598637	0.551323	0.999975	0.121884	-1.40855	0.163339	0.999994	-0.0735983	0.844369	0.401304	0.99975	black	grey
C21orf91	-0.0403619	0.316793	0.752331	0.931503	-0.204172	1.55052	0.125469	0.280276	-0.0423593	0.332479	0.740509	0.867837	-0.0441207	0.346169	0.730241	0.999975	-0.0374245	0.292148	0.771027	0.999994	-0.121376	0.940632	0.350088	0.99975	black	brown
MDM2	-0.0627569	0.755086	0.452699	0.790507	-0.160618	1.86985	0.0656342	0.182284	-0.0274744	0.330578	0.741938	0.868347	0.0342776	-0.412274	0.681382	0.999975	0.118204	-1.41452	0.161587	0.999994	0.00280574	-0.0333321	0.973503	0.99975	black	black
SGCB	0.0120355	-0.147961	0.882793	0.968562	-0.119331	1.41944	0.160154	0.32912	-0.0257589	0.31668	0.752417	0.875967	0.0521279	-0.640611	0.52384	0.999975	0.106771	-1.30551	0.195941	0.999994	0.0330348	-0.400993	0.689631	0.99975	black	grey
ADAM10	0.137787	-1.85286	0.0680644	0.379327	-0.0700486	0.911403	0.365172	0.562081	-0.0218486	0.29381	0.769762	0.885427	0.0376965	-0.506728	0.613918	0.999975	0.0446457	-0.597109	0.552337	0.999994	-0.0979684	1.30077	0.197549	0.99975	black	grey
E2F6	0.0622125	-0.849474	0.398477	0.754406	-0.184251	2.43422	0.0174448	0.0781755	-0.0213335	0.291303	0.77167	0.886305	0.0729513	-0.995743	0.322762	0.999975	0.107616	-1.46147	0.148304	0.999994	0.0429975	-0.579692	0.56396	0.99975	black	grey
MON2	0.063171	-0.940701	0.350052	0.723283	-0.0335968	0.484072	0.629827	0.783489	0.0195705	-0.291438	0.771567	0.886305	-0.0178725	0.266048	0.790974	0.999975	0.00403585	-0.0597737	0.952504	0.999994	-0.11641	1.71161	0.0913402	0.99975	black	green
ZNF813	0.0443691	-0.259258	0.796187	0.944764	-0.230962	1.30578	0.195849	0.37586	0.0495551	-0.289568	0.772992	0.886704	0.0127218	-0.0743089	0.940974	0.999975	0.0163155	-0.0948188	0.924726	0.999994	-0.281324	1.62308	0.10901	0.99975	black	grey
SEPSECS	0.125851	-1.5547	0.124469	0.4812	-0.152855	1.82703	0.0719037	0.193077	-0.0232037	0.286654	0.775213	0.888138	-0.113926	1.40687	0.163834	0.999975	-0.0293168	0.360204	0.719765	0.999994	-0.0741147	0.904015	0.369049	0.99975	black	green
ZNF267	-0.00807391	0.0746594	0.940696	0.984254	-0.197026	1.76279	0.0822451	0.210445	0.0305483	-0.282487	0.778393	0.889438	-0.0446429	0.412662	0.6811	0.999975	0.109426	-1.00638	0.317655	0.999994	-0.0966077	0.882051	0.38073	0.99975	black	grey
LSMEM1	0.295724	-0.940477	0.350166	0.723283	-0.595498	1.8324	0.0710921	0.191841	-0.0847744	0.26961	0.788243	0.894653	0.0742614	-0.236084	0.814048	0.999975	0.273184	-0.864088	0.390454	0.999994	0.234915	-0.737654	0.463159	0.99975	black	grey
MSH6	0.0194553	-0.300793	0.764453	0.935384	-0.158338	2.3686	0.0205841	0.087116	-0.0173666	0.268507	0.789089	0.895246	-0.0261083	0.403505	0.687791	0.999975	-0.0131581	0.202331	0.840238	0.999994	-0.098121	1.49786	0.138608	0.99975	black	turquoise
LINC01801	-0.0797179	0.157476	0.875317	0.966193	-1.02182	1.95304	0.0547622	0.163151	-0.133523	0.26377	0.792722	0.89739	0.167915	-0.33158	0.741184	0.999975	-0.159262	0.312905	0.755271	0.999994	-0.395002	0.77044	0.443599	0.99975	black	blue
UBR2	-0.0931655	1.46053	0.148561	0.514654	-0.147504	2.23737	0.0284069	0.107178	-0.0161024	0.252439	0.801432	0.902737	0.0408621	-0.640352	0.524008	0.999975	0.0293022	-0.456876	0.649157	0.999994	-0.100374	1.55367	0.124716	0.99975	black	brown
VPS8	0.0444719	-0.637362	0.525942	0.829828	-0.141968	1.96865	0.0529038	0.159711	-0.0175136	0.251007	0.802535	0.903341	-0.0172501	0.247134	0.805519	0.999975	0.00724548	-0.103278	0.918034	0.999994	-0.0609667	0.86273	0.391195	0.99975	black	grey
GZF1	0.079215	-0.788021	0.433312	0.779271	-0.0849239	0.817405	0.416436	0.612056	-0.024457	0.243301	0.808475	0.907157	0.0255515	-0.25409	0.800162	0.999975	0.0879185	-0.869865	0.38731	0.999994	-0.0986981	0.969438	0.335622	0.99975	black	brown
INTS6	-0.0571597	0.75197	0.454558	0.791511	-0.0742876	0.945594	0.347567	0.544991	0.0183103	-0.240889	0.810337	0.908223	0.0217907	-0.286566	0.775281	0.999975	0.0528748	-0.691833	0.491302	0.999994	0.00262809	-0.0341376	0.972863	0.99975	black	black
THAP2	-0.0545814	0.473638	0.637213	0.885628	-0.212861	1.78721	0.0781776	0.203784	-0.0275844	0.239373	0.811507	0.908812	-0.0994496	0.862673	0.391226	0.999975	-0.117969	1.01815	0.312069	0.999994	-0.10363	0.887907	0.377593	0.99975	black	red
NUP98	-0.0103689	0.123593	0.901987	0.974438	-0.192867	2.22433	0.0293114	0.109444	-0.019345	0.230592	0.818296	0.912313	0.00711815	-0.0848149	0.932648	0.999975	-0.0176552	0.209305	0.834811	0.999994	-0.0873162	1.02764	0.307613	0.99975	black	turquoise
FRS2	-0.0344113	0.452834	0.652051	0.892293	-0.101042	1.28652	0.202447	0.384611	0.0169104	-0.222537	0.824536	0.916133	0.0612779	-0.806089	0.422887	0.999975	0.0424951	-0.556184	0.579836	0.999994	-0.0750818	0.97556	0.3326	0.99975	black	brown
2020-03-07	0.0408505	-0.677213	0.500474	0.817847	-0.157419	2.52501	0.013808	0.0672359	-0.0130535	0.216404	0.829294	0.918442	0.0446994	-0.740748	0.461292	0.999975	0.0247445	-0.407989	0.684512	0.999994	-0.0331325	0.54233	0.589292	0.99975	black	grey
TBK1	0.0127043	-0.15412	0.877953	0.966856	-0.155542	1.82571	0.0721056	0.193221	-0.0177464	0.215292	0.830158	0.918902	0.0418137	-0.50707	0.61368	0.999975	0.066176	-0.798453	0.427274	0.999994	0.012812	-0.153464	0.878468	0.99975	black	pink
CUL4B	0.0828642	-0.928029	0.356541	0.727374	-0.233828	2.53378	0.0134958	0.0663437	-0.0191719	0.214718	0.830603	0.919195	0.0339211	-0.379757	0.705261	0.999975	-0.0112846	0.125696	0.900328	0.999994	-0.0938471	1.03776	0.302909	0.99975	black	grey
AL080250.1	0.202064	-0.675169	0.501765	0.818944	-0.487861	1.57724	0.119192	0.270402	-0.0632495	0.211345	0.833224	0.920712	-0.296457	0.990211	0.325439	0.999975	-0.113924	0.378601	0.706116	0.999994	-0.0707573	0.233441	0.816092	0.99975	black	brown
IDE	-0.0532056	0.414997	0.679397	0.903976	-0.304134	2.29525	0.0246807	0.0980569	-0.0268933	0.20977	0.834449	0.921404	0.0457997	-0.357101	0.722077	0.999975	0.132073	-1.02458	0.309046	0.999994	-0.0245883	0.189364	0.850349	0.99975	black	black
GIN1	0.0361381	-0.405343	0.686446	0.907202	-0.124617	1.35242	0.180539	0.356384	0.0177982	-0.199638	0.842335	0.925154	0.0590505	-0.662097	0.510055	0.999975	-0.00644228	0.0718684	0.942909	0.999994	-0.037912	0.41987	0.67585	0.99975	black	grey
PLAA	0.0210406	-0.297607	0.766874	0.936362	-0.103248	1.41301	0.162029	0.331469	0.0137078	-0.193893	0.846814	0.927497	-0.0148552	0.210041	0.834238	0.999975	-0.0349701	0.491952	0.624273	0.999994	-0.0548155	0.765542	0.44649	0.99975	black	blue
PUS7	0.0890959	-0.890823	0.376037	0.74225	-0.153784	1.48773	0.141258	0.302927	0.0193558	-0.193533	0.847095	0.92767	0.111152	-1.11094	0.270347	0.999975	0.153132	-1.5228	0.132257	0.999994	-0.0265508	0.262116	0.793992	0.99975	black	pink
ZNF529	0.00144769	-0.0177942	0.985853	0.997301	-0.118894	1.41397	0.161746	0.331218	0.015354	-0.188728	0.850846	0.929425	0.105868	-1.3008	0.197539	0.999975	-0.00213646	0.0261181	0.979237	0.999994	0.0283852	-0.344491	0.731497	0.99975	black	red
AC026801.2	0.101205	-0.325226	0.745968	0.929311	-0.771481	2.39875	0.019084	0.0828801	-0.0575858	0.185058	0.853712	0.930537	-0.0370293	0.118951	0.90565	0.999975	-0.127561	0.4077	0.684722	0.999994	0.0292392	-0.0927745	0.926344	0.99975	black	brown
GPCPD1	0.0945688	-0.81761	0.416319	0.768509	-0.0530219	0.443538	0.658727	0.803388	-0.0214656	0.185589	0.853297	0.930537	0.313568	-2.71002	0.00843136	0.999975	0.137812	-1.18503	0.239965	0.999994	-0.0747449	0.638059	0.525491	0.99975	black	blue
USO1	0.0826156	-1.13293	0.261063	0.649502	-0.0330029	0.437893	0.662795	0.806142	0.0130616	-0.179121	0.858354	0.932835	0.0943819	-1.29381	0.199931	0.999975	0.117302	-1.59987	0.114074	0.999994	-0.0114676	0.155272	0.877048	0.99975	black	grey
PAPOLG	0.097236	-1.26098	0.211449	0.595257	-0.136165	1.70853	0.0919124	0.226247	-0.0133447	0.173061	0.863096	0.935168	-0.0934412	1.21133	0.229793	0.999975	0.00512418	-0.0660917	0.947491	0.999994	-0.237479	3.0408	0.00330523	0.99975	black	red
THADA	0.0203886	-0.172193	0.863776	0.964415	-0.30044	2.45507	0.016541	0.0756382	0.0199843	-0.168783	0.866448	0.937001	-0.0441417	0.372666	0.710509	0.999975	0.041105	-0.345275	0.73091	0.999994	-0.095809	0.798944	0.426991	0.99975	black	green
ZBTB11	0.0661536	-0.797792	0.427655	0.775356	-0.140415	1.63843	0.105762	0.24946	0.0137591	-0.165934	0.868681	0.937575	-0.044775	0.539775	0.591043	0.999975	0.000526144	-0.00631078	0.994982	0.999994	-0.118308	1.40874	0.163282	0.99975	black	brown
ZNF780A	0.134809	-1.11808	0.267306	0.65601	-0.147008	1.1797	0.242063	0.432459	0.0199054	-0.165096	0.869338	0.937911	-0.291962	2.42059	0.0180591	0.999975	-0.178832	1.47516	0.144596	0.999994	-0.363689	2.97828	0.00396574	0.99975	black	brown
ZNF254	0.1368	-1.2979	0.198529	0.579562	-0.0270104	0.247949	0.804891	0.893518	0.0172368	-0.163539	0.870559	0.93845	0.0345008	-0.327208	0.744475	0.999975	0.00717361	-0.0676913	0.946222	0.999994	-0.0219978	0.20607	0.837327	0.99975	black	red
EFEMP1	0.198094	-0.49324	0.623367	0.879886	-0.193355	0.465822	0.642771	0.792892	0.0604444	-0.150506	0.880793	0.943833	-0.0331881	0.0826059	0.934398	0.999975	0.0552359	-0.136789	0.891585	0.999994	-0.0985157	0.2422	0.809325	0.99975	black	turquoise
SEC23IP	0.0239908	-0.406084	0.685904	0.907092	-0.0742152	1.21546	0.228222	0.415669	0.00851541	-0.144141	0.885798	0.946502	0.056716	-0.959662	0.340487	0.999975	0.076853	-1.29382	0.199927	0.999994	-0.0238688	0.398917	0.691153	0.99975	black	black
NBR1	0.127759	-1.53239	0.129876	0.488863	-0.0694049	0.805465	0.423244	0.617629	-0.0104728	0.125618	0.90039	0.953132	0.0425133	-0.509737	0.611819	0.999975	-0.0212725	0.25377	0.800408	0.999994	-0.148638	1.76032	0.0826673	0.99975	black	brown
CCNT2-AS1	0.0417783	-0.128793	0.897886	0.974229	-0.603045	1.79873	0.0763169	0.200539	0.0380757	-0.117381	0.90689	0.956366	0.122816	-0.378475	0.706209	0.999975	-0.164237	0.50356	0.616131	0.999994	0.0795072	-0.242007	0.809474	0.99975	black	brown
ZNF823	0.0321146	-0.292713	0.770596	0.937354	-0.0552188	0.486972	0.62778	0.78188	-0.0120275	0.109629	0.913013	0.959902	-0.283793	2.58573	0.0117734	0.999975	-0.141598	1.28362	0.203453	0.999994	-0.126464	1.13812	0.258903	0.99975	black	red
ZNF845	0.0536505	-0.556731	0.579465	0.859127	-0.150056	1.50661	0.136354	0.296004	0.00943185	-0.0978765	0.922307	0.964514	-0.0405278	0.420402	0.675463	0.999975	0.0736686	-0.760318	0.449586	0.999994	-0.0918761	0.941359	0.349718	0.99975	black	grey
CUL2	0.112814	-2.15248	0.034765	0.292002	-0.0503239	0.929024	0.356029	0.552579	0.00483133	-0.0921832	0.926812	0.966131	0.0264345	-0.504181	0.615697	0.999975	0.0375223	-0.712042	0.478776	0.999994	0.0568347	-1.0707	0.287934	0.99975	black	grey
SF3B1	0.106032	-2.04923	0.0441418	0.318298	-0.112042	2.09514	0.039732	0.132463	0.00471954	-0.0912144	0.927579	0.966303	0.0122491	-0.236645	0.813614	0.999975	-0.0139151	0.267473	0.789881	0.999994	-0.0868622	1.65754	0.101828	0.99975	black	brown
TBC1D32	-0.239002	1.48599	0.141716	0.504346	-0.527593	3.17387	0.00222538	0.0206592	-0.013119	0.0815692	0.935219	0.970081	-0.0212817	0.13227	0.895146	0.999975	0.0159132	-0.0984037	0.921889	0.999994	-0.065793	0.4039	0.687502	0.99975	black	green
RBM12	0.058326	-0.862338	0.391409	0.751339	-0.160134	2.29074	0.0249547	0.0987285	-0.00538042	0.0795502	0.936819	0.970818	0.0352102	-0.520384	0.604417	0.999975	0.0758007	-1.11463	0.268774	0.999994	-0.0588454	0.85903	0.393219	0.99975	black	green
CCDC87	0.214739	-0.603445	0.548138	0.842655	-0.503086	1.36787	0.175672	0.350495	-0.0270441	0.0759994	0.939634	0.971728	-0.173365	0.487	0.62776	0.999975	-0.390601	1.09169	0.278664	0.999994	0.246586	-0.684189	0.496086	0.99975	black	grey
ELP1	0.00668859	-0.103484	0.917871	0.979414	-0.0927905	1.38905	0.169165	0.341292	-0.00487195	0.0753791	0.940125	0.971805	-0.0203125	0.314153	0.754327	0.999975	-0.0417398	0.642288	0.522758	0.999994	-0.158264	2.4177	0.018192	0.99975	black	brown
ZC3H14	0.0468478	-0.765701	0.446396	0.787033	-0.0693498	1.09671	0.276479	0.471557	-0.00424962	0.0694592	0.94482	0.974327	-0.0204406	0.333969	0.739389	0.999975	0.0263663	-0.428609	0.669508	0.999994	-0.0487536	0.786787	0.434029	0.99975	black	green
MCPH1	0.067713	-1.12416	0.264737	0.65385	-0.061643	0.990187	0.32545	0.523055	0.00411472	-0.0683135	0.945728	0.974741	0.0151048	-0.250675	0.80279	0.999975	0.0466225	-0.769827	0.44396	0.999994	0.0218187	-0.357656	0.721663	0.99975	black	brown
PCNX4	0.115433	-2.00945	0.048297	0.329164	-0.0489106	0.823813	0.412808	0.608505	0.00344443	-0.0599619	0.952355	0.978215	-0.0157736	0.274486	0.784509	0.999975	0.0182243	-0.31553	0.753286	0.999994	-0.0476853	0.819623	0.415178	0.99975	black	grey
OPA1	0.150579	-1.82728	0.0718657	0.38916	-0.0991834	1.16455	0.248104	0.440279	0.00478493	-0.0580669	0.953859	0.97889	-0.0146037	0.177152	0.859894	0.999975	0.0230046	-0.27765	0.782089	0.999994	-0.0830762	0.995406	0.322924	0.99975	black	grey
DPY19L4	-0.021695	0.186552	0.852545	0.961677	-0.228022	1.89712	0.0618851	0.175881	-0.0061653	0.0530158	0.957868	0.98134	0.0451807	-0.38836	0.698913	0.999975	0.059435	-0.508305	0.612817	0.999994	-0.0151804	0.128886	0.897813	0.99975	black	brown
NFYA	0.0775181	-0.879752	0.381966	0.745657	-0.174566	1.91687	0.0592848	0.17125	-0.00399933	0.0453894	0.963925	0.98396	-0.136648	1.55025	0.125533	0.999975	-0.118343	1.3358	0.185888	0.999994	-0.171209	1.91851	0.0590736	0.99975	black	grey
ZNF17	0.0674366	-0.602379	0.548844	0.843202	-0.155751	1.34612	0.182553	0.358854	-0.00503257	0.0449546	0.96427	0.98396	0.0156194	-0.13947	0.889474	0.999975	0.0127365	-0.113153	0.910229	0.999994	-0.0588716	0.519231	0.605217	0.99975	black	green
ZNF761	0.0944894	-0.91904	0.361191	0.728774	-0.208345	1.9607	0.0538431	0.161567	-0.00419113	0.0407655	0.967597	0.985039	-0.0133592	0.129889	0.897022	0.999975	0.0933592	-0.90313	0.369515	0.999994	-0.0231698	0.222513	0.824554	0.99975	black	grey
ZNF83	0.259486	-2.52723	0.0137283	0.195018	-0.0774904	0.730227	0.467657	0.656512	-0.00325168	0.0316702	0.974824	0.988577	0.0214964	-0.209286	0.834825	0.999975	-0.0321364	0.311294	0.756491	0.999994	-0.0879577	0.845839	0.400489	0.99975	black	grey
ZNF10	0.0647236	-0.642258	0.522777	0.828789	-0.150016	1.44033	0.154177	0.321425	-0.00276708	0.0274586	0.978171	0.990245	-0.0878847	0.871769	0.386277	0.999975	-0.0548967	0.541794	0.589659	0.999994	-0.0968845	0.949254	0.345716	0.99975	black	red
KLHL8	-0.00239377	0.0207159	0.98353	0.997173	-0.174081	1.45765	0.149353	0.314485	-0.00309949	0.0268241	0.978675	0.990255	-0.117352	1.01521	0.313457	0.999975	-0.0501109	0.431317	0.667547	0.999994	-0.100949	0.862595	0.391269	0.99975	black	blue
ZNF484	-0.0026742	0.0302953	0.975917	0.995021	-0.182521	2.00065	0.0492606	0.152715	0.00190616	-0.0215949	0.982832	0.991971	-0.0833391	0.94378	0.348488	0.999975	0.0295983	-0.333494	0.739746	0.999994	-0.127513	1.42632	0.158165	0.99975	black	red
WDR48	0.073365	-1.14753	0.255019	0.643648	-0.0715352	1.08261	0.282648	0.47792	-0.00132675	0.0207527	0.983501	0.992078	-0.0112363	0.175687	0.861041	0.999975	-0.0400915	0.623692	0.534832	0.999994	-0.0612397	0.945781	0.347473	0.99975	black	brown
SLC16A14	0.148411	-1.54994	0.125608	0.483106	-0.0303132	0.306308	0.760268	0.866475	0.00150867	-0.0157563	0.987473	0.993956	-0.00267078	0.0278823	0.977834	0.999975	-0.0429676	0.446305	0.656737	0.999994	-0.0619885	0.639207	0.524748	0.99975	black	red
ZSCAN12	0.146375	-1.56417	0.122229	0.476588	-0.155443	1.60719	0.112457	0.259963	-0.00145168	0.0155132	0.987666	0.994065	-0.0404266	0.431845	0.667165	0.999975	0.00722362	-0.0767743	0.939019	0.999994	-0.115193	1.21542	0.228238	0.99975	black	red
ZBTB1	-0.0221372	0.211993	0.832721	0.955363	-0.160656	1.48858	0.141032	0.302634	-0.00137238	0.0131426	0.989551	0.995016	0.105865	-1.01342	0.314305	0.999975	0.180297	-1.71723	0.0903034	0.999994	0.0486673	-0.460168	0.646804	0.99975	black	black
ZNF25	0.168312	-1.47688	0.144136	0.50939	-0.131261	1.11441	0.268867	0.463393	-0.00127947	0.0112272	0.991074	0.995896	-0.00461308	0.0404634	0.967837	0.999975	-0.0793113	0.692161	0.491097	0.999994	-0.085406	0.739946	0.461776	0.99975	black	red
ZNF512	0.0913749	-1.30655	0.195588	0.575547	-0.0508385	0.703348	0.484143	0.669851	0.000791352	-0.0113157	0.991003	0.995896	0.0344842	-0.492902	0.623605	0.999975	0.0236542	-0.336395	0.737567	0.999994	-0.0134818	0.190339	0.849587	0.99975	black	blue
ZNF518B	0.0599573	-0.718253	0.474962	0.803129	-0.195159	2.26205	0.0267614	0.103554	-0.000744078	0.00891384	0.992913	0.99668	-0.00295433	0.0353782	0.971878	0.999975	-0.0426548	0.508212	0.612882	0.999994	-0.201122	2.3789	0.0200605	0.99975	black	green
AC002075.2	-0.867693	3.21185	0.00198406	0.0877181	-0.793078	2.84042	0.00587645	0.0387679	-0.893223	3.30643	0.00148534	0.0188681	-0.24153	0.893718	0.374497	0.999975	-0.341031	1.25552	0.213412	0.999994	-0.17096	0.624834	0.534086	0.99975	blue	magenta
UBL5P2	-0.471405	1.90017	0.0614775	0.364495	-0.499716	1.94894	0.0552596	0.163901	-0.826589	3.33195	0.00137253	0.0179052	-0.385519	1.55341	0.124778	0.999975	0.0197865	-0.0793248	0.936998	0.999994	-0.111359	0.443204	0.658968	0.99975	blue	grey
RPS26P31	-0.34434	1.33475	0.186228	0.56371	-0.217231	0.81473	0.417955	0.613279	-0.808817	3.13526	0.00249872	0.0259894	-0.0676139	0.261993	0.794086	0.999975	0.000952869	-0.00367357	0.997079	0.999994	0.0401254	-0.153573	0.878383	0.99975	blue	grey
RPS29P16	-0.629179	2.58122	0.0119146	0.182453	-0.740699	2.94015	0.00442656	0.0324959	-0.803701	3.29728	0.00152787	0.0191925	-0.475459	1.94987	0.0551469	0.999975	-0.323692	1.32076	0.190828	0.999994	-0.41028	1.66193	0.100943	0.99975	blue	grey
ELOCP2	-0.331231	1.80695	0.0750134	0.394129	-0.703206	3.71172	0.000406379	0.00664367	-0.791331	4.31701	5.04173e-05	0.00245321	0.0375095	-0.204549	0.838511	0.999975	0.438224	-2.37767	0.0201223	0.999994	0.472001	-2.54237	0.0131962	0.99975	blue	grey
AC027313.1	-0.489784	1.93726	0.056698	0.352189	-0.684788	2.6207	0.0107286	0.0570279	-0.786827	3.11225	0.00267627	0.0270551	-0.0791348	0.312891	0.755282	0.999975	0.0579625	-0.22802	0.820287	0.999994	-0.157257	0.614152	0.541081	0.99975	blue	grey
NPM1P6	-0.330475	1.97688	0.0519457	0.338567	-0.176639	1.02236	0.310084	0.506674	-0.775555	4.63943	1.55593e-05	0.00120856	0.149446	-0.893652	0.374532	0.999975	0.0207294	-0.12333	0.902195	0.999994	0.0047557	-0.0280891	0.97767	0.99975	blue	magenta
AC069218.1	-0.375759	1.7519	0.0841147	0.411906	-0.367349	1.65713	0.101912	0.242917	-0.762351	3.5544	0.000679107	0.0114874	-0.221973	1.03453	0.304406	0.999975	-0.323082	1.49815	0.138535	0.999994	-0.209358	0.963765	0.33844	0.99975	blue	magenta
RN7SL4P	-0.808585	3.32651	0.00139587	0.0731773	-0.496666	1.977	0.0519318	0.157875	-0.759163	3.12327	0.00258984	0.026516	-0.0993403	0.408536	0.684112	0.999975	-0.346041	1.4159	0.161183	0.999994	-0.0177863	0.0722486	0.942607	0.99975	blue	magenta
TMSB4XP2	-0.627238	2.56489	0.0124388	0.185984	-0.61655	2.4394	0.0172161	0.0777085	-0.755347	3.08883	0.00286894	0.0281459	-0.14025	0.573298	0.568257	0.999975	-0.0983029	0.399802	0.690504	0.999994	-0.128821	0.52012	0.604601	0.99975	blue	grey
HSPE1P4	-0.573634	3.16285	0.00230046	0.0926202	-0.63831	3.40528	0.00109166	0.0127976	-0.746995	4.11881	0.000101699	0.00366398	0.0789899	-0.435367	0.664618	0.999975	-0.0587502	0.322176	0.748267	0.999994	-0.0734815	0.400039	0.690331	0.99975	blue	magenta
NCOA4P4	-0.236855	1.09355	0.277856	0.666044	-0.598146	2.67201	0.00934755	0.052568	-0.74416	3.43582	0.000991476	0.0144641	0.0816786	-0.376967	0.707324	0.999975	0.138758	-0.637169	0.526067	0.999994	0.207462	-0.945746	0.34749	0.99975	blue	grey
NDUFB8P2	-0.731599	3.65114	0.000495977	0.0437575	-0.739496	3.57082	0.000644039	0.00903859	-0.730442	3.64545	0.000505286	0.00964888	-0.213405	1.06464	0.290654	0.999975	-0.0575162	0.285487	0.776103	0.999994	-0.0117867	0.0580801	0.953848	0.99975	blue	grey
RPS7P11	-0.68392	4.77274	9.46043e-06	0.00409208	-0.540841	3.65183	0.000494857	0.00758319	-0.721457	5.03482	3.49494e-06	0.000479738	-0.0389203	0.271507	0.78679	0.999975	-0.319767	2.21941	0.0296595	0.999994	-0.129596	0.892968	0.374896	0.99975	blue	magenta
RANP1	-0.511968	3.27783	0.00162208	0.0787012	-0.59973	3.71516	0.000401779	0.00660517	-0.717118	4.59141	1.85841e-05	0.00132221	0.0548084	-0.350778	0.726795	0.999975	-0.0637886	0.40619	0.685827	0.999994	-0.0867196	0.548205	0.585273	0.99975	blue	magenta
RPL41P2	-0.464153	2.39455	0.0192869	0.223287	-0.542435	2.70763	0.00848647	0.0493759	-0.712411	3.6754	0.000458032	0.00915686	0.14792	-0.762837	0.448091	0.999975	-0.0938636	0.481618	0.631561	0.999994	-0.00910084	0.0463582	0.963155	0.99975	blue	magenta
RPL35P1	-0.469831	2.47554	0.0156946	0.205587	-0.3912	1.99437	0.049958	0.154059	-0.712221	3.75279	0.000354651	0.00785007	0.211407	-1.1135	0.269254	0.999975	0.147414	-0.772518	0.442375	0.999994	0.10203	-0.530811	0.597209	0.99975	blue	grey
RPL29P11	-0.71639	2.96047	0.00417509	0.11746	-0.501593	2.00559	0.0487181	0.151672	-0.711841	2.94175	0.00440632	0.0368274	0.235385	-0.972373	0.334171	0.999975	0.0752195	-0.30916	0.758106	0.999994	0.209486	-0.854769	0.395558	0.99975	blue	magenta
ATP5F1EP2	-0.513276	2.12256	0.0372842	0.298713	-0.643408	2.57439	0.0121314	0.0618736	-0.707032	2.92388	0.00463792	0.0381047	-0.064926	0.268392	0.789177	0.999975	0.115025	-0.473088	0.637604	0.999994	0.178894	-0.730444	0.467525	0.99975	blue	tan
YWHAEP5	-0.358717	1.73233	0.0875641	0.416899	-0.438254	2.04777	0.044288	0.142518	-0.701593	3.38824	0.00115162	0.0158798	0.0513759	-0.248015	0.804839	0.999975	-0.274425	1.31808	0.191719	0.999994	0.033153	-0.158082	0.874842	0.99975	blue	grey
RPL13AP25	-0.592487	3.2137	0.00197297	0.0877181	-0.337265	1.77001	0.0810257	0.208688	-0.693958	3.76417	0.000341468	0.00771973	-0.111304	0.603502	0.548101	0.999975	-0.20976	1.13159	0.261618	0.999994	-0.147603	0.790502	0.431871	0.99975	blue	magenta
AL158201.1	-0.57176	2.49069	0.0150938	0.201408	-0.682327	2.87591	0.00531653	0.0364046	-0.693386	3.02059	0.00350665	0.0318381	0.0793073	-0.345351	0.730853	0.999975	-0.222963	0.966006	0.337325	0.999994	-0.442892	1.90496	0.0608424	0.99975	blue	lightcyan
AL139095.2	-0.418391	1.99861	0.0494856	0.331726	-0.507121	2.34388	0.021892	0.0905463	-0.686139	3.2777	0.00162276	0.0199262	0.032456	-0.154982	0.877276	0.999975	0.0604515	-0.287207	0.774792	0.999994	0.110458	-0.520984	0.604001	0.99975	blue	grey
PPIAP40	-0.457659	1.92612	0.0580999	0.356193	-0.649556	2.64505	0.0100515	0.0548332	-0.68435	2.88024	0.00525172	0.0412014	0.273752	-1.1517	0.253314	0.999975	-0.191779	0.802754	0.4248	0.999994	0.402594	-1.67297	0.0987399	0.99975	blue	grey
RPL41P5	-0.61967	3.8227	0.000280761	0.0338231	-0.543103	3.24167	0.00181195	0.0179951	-0.669979	4.13315	9.67181e-05	0.00359151	0.0255385	-0.157488	0.875308	0.999975	-0.082379	0.505438	0.614819	0.999994	0.00328481	-0.0200079	0.984093	0.99975	blue	magenta
RN7SL5P	-0.765349	3.70116	0.000420798	0.0400302	-0.324474	1.51822	0.133405	0.291704	-0.668266	3.23175	0.0018676	0.0217828	-0.19652	0.950004	0.345337	0.999975	-0.217093	1.04415	0.299961	0.999994	-0.094937	0.453309	0.65171	0.99975	blue	magenta
LDHBP2	-0.455441	1.88817	0.0630958	0.367653	-0.579938	2.32631	0.0228656	0.0933283	-0.665824	2.76044	0.00734231	0.0506425	-0.0254276	0.105379	0.916373	0.999975	-0.190539	0.785659	0.434685	0.999994	-0.11178	0.457566	0.648664	0.99975	blue	grey
AC080023.2	-0.275391	1.22578	0.224338	0.60921	-0.25479	1.09729	0.276228	0.471271	-0.665697	2.96312	0.00414338	0.0355193	0.0013403	-0.00596355	0.995259	0.999975	0.154737	-0.685012	0.49557	0.999994	0.212358	-0.933278	0.353844	0.99975	blue	grey
AC092597.1	-0.571915	2.7693	0.00716486	0.15031	-0.458267	2.14701	0.0352138	0.123045	-0.664249	3.21647	0.00195641	0.02249	-0.450768	2.18189	0.032434	0.999975	0.00337467	-0.0162522	0.987079	0.999994	-0.245595	1.17419	0.244248	0.99975	blue	grey
AC064799.1	-0.306029	1.4184	0.160454	0.528081	-0.202197	0.906754	0.367608	0.564754	-0.662177	3.06917	0.00304055	0.0291868	0.423716	-1.96315	0.0535524	0.999975	0.264855	-1.22092	0.226161	0.999994	0.317257	-1.45188	0.150947	0.99975	blue	grey
Z74021.1	-0.494822	2.58144	0.0119077	0.182453	-0.46008	2.32233	0.0230916	0.0938131	-0.660509	3.44589	0.00096042	0.0142781	-0.125684	0.655438	0.514307	0.999975	-0.120137	0.623349	0.535055	0.999994	0.107843	-0.555504	0.580299	0.99975	blue	grey
ADH5P4	-0.299554	1.53792	0.128519	0.487243	-0.837307	4.15931	8.82347e-05	0.00224336	-0.656909	3.37268	0.00120907	0.0164311	0.108987	-0.559341	0.577692	0.999975	0.0685162	-0.34986	0.727481	0.999994	-0.072293	0.366469	0.715107	0.99975	blue	grey
PGDP1	-0.799853	3.36999	0.00121928	0.0679394	-0.836946	3.41188	0.00106924	0.012617	-0.656293	2.7652	0.00724644	0.0502062	-0.00815662	0.0343534	0.972692	0.999975	-0.27656	1.15891	0.250382	0.999994	-0.151211	0.629045	0.531341	0.99975	blue	grey
EEF1A1P10	-0.537526	2.18582	0.0321326	0.281335	-0.442239	1.74001	0.0861971	0.217428	-0.652848	2.65484	0.00979059	0.0608159	-0.249981	1.01617	0.313006	0.999975	-0.337842	1.36638	0.176138	0.999994	-0.105853	0.425012	0.672115	0.99975	blue	grey
AL031729.1	-0.372344	1.75368	0.0838079	0.411281	-0.388441	1.77014	0.0810034	0.208688	-0.641634	3.02206	0.00349159	0.0317866	-0.216829	1.02086	0.310794	0.999975	-0.129033	0.604433	0.547485	0.999994	0.153947	-0.715909	0.476399	0.99975	blue	grey
RPS20P14	-0.414055	1.78752	0.0781267	0.399611	-0.451559	1.88619	0.0633653	0.178412	-0.640395	2.76473	0.00725591	0.0502512	-0.00986769	0.0425844	0.966153	0.999975	-0.0599917	0.257588	0.797471	0.999994	0.0834896	-0.355883	0.722985	0.99975	blue	magenta
RPS3AP5	-0.373746	1.87674	0.0646696	0.371593	-0.39152	1.90221	0.0612061	0.174743	-0.632442	3.17584	0.00221226	0.0240744	0.0562679	-0.282442	0.778428	0.999975	-0.289353	1.4451	0.152836	0.999994	-0.1584	0.785351	0.434864	0.99975	blue	magenta
AC010468.1	-0.425816	2.14927	0.035028	0.292854	-0.656364	3.20546	0.00202285	0.019355	-0.631874	3.1894	0.00212356	0.0235021	-0.155406	0.784109	0.435588	0.999975	-0.2363	1.18624	0.239486	0.999994	-0.0461708	0.2301	0.818677	0.99975	blue	magenta
RPL7AP6	-0.300374	1.92297	0.0585014	0.357361	-0.363829	2.25364	0.0273126	0.104979	-0.631747	4.04448	0.000131724	0.00430761	0.0626552	-0.400966	0.689651	0.999975	-0.00285324	0.0181672	0.985556	0.999994	0.0152549	-0.0964274	0.923453	0.99975	blue	magenta
AL450063.1	-0.210834	1.11133	0.27018	0.658259	-0.276073	1.40801	0.163499	0.333558	-0.629758	3.31961	0.00142603	0.0183959	-0.158261	0.833906	0.407135	0.999975	-0.175553	0.92035	0.360511	0.999994	0.158866	-0.826829	0.411108	0.99975	blue	grey
RPS27AP16	-0.468347	3.60409	0.000578229	0.0466423	-0.424146	3.15806	0.00233378	0.0213957	-0.62973	4.8461	7.17545e-06	0.000759387	0.00642495	-0.0494241	0.96072	0.999975	-0.123168	0.942689	0.349041	0.999994	-0.131731	1.00091	0.320273	0.99975	blue	magenta
AL139100.1	-0.285471	1.62502	0.108595	0.455404	-0.296227	1.63155	0.10721	0.251856	-0.629651	3.58433	0.000616506	0.0109198	0.0844137	-0.480343	0.632462	0.999975	0.0167796	-0.0949995	0.924583	0.999994	0.0193281	-0.108634	0.913799	0.99975	blue	grey
Z97353.1	-0.339588	1.97621	0.0520232	0.338811	-0.327127	1.84193	0.0696677	0.189404	-0.628531	3.65777	0.00048531	0.00938335	0.116365	-0.676928	0.500654	0.999975	-0.0694085	0.40173	0.689091	0.999994	-0.040858	0.234767	0.815066	0.99975	blue	magenta
RPS24P8	-0.354565	1.61609	0.110516	0.458917	-0.444684	1.9611	0.0537953	0.161481	-0.628003	2.86249	0.0055223	0.0424462	-0.020722	0.0944158	0.925045	0.999975	-0.0859202	0.389501	0.698073	0.999994	-0.235009	1.05764	0.293811	0.99975	blue	magenta
AL133260.1	-0.581785	2.31578	0.0234672	0.242743	-0.259789	1.00054	0.320453	0.517226	-0.625178	2.48857	0.0151766	0.0794148	0.120341	-0.478839	0.633527	0.999975	0.0740452	-0.293139	0.770272	0.999994	0.295502	-1.16139	0.249381	0.99975	blue	grey
SERBP1P5	-0.36475	1.87502	0.0649094	0.372202	-0.226365	1.12589	0.264009	0.457817	-0.619908	3.18674	0.0021407	0.02363	0.265374	-1.36367	0.176987	0.999975	0.172825	-0.883605	0.379896	0.999994	0.168094	-0.853185	0.39643	0.99975	blue	black
TMSB4XP1	-0.883187	3.23411	0.00185422	0.0846296	-0.815115	2.88801	0.00513726	0.0355601	-0.61857	2.26517	0.0265594	0.112264	0.0460421	-0.168538	0.86664	0.999975	-0.262638	0.956536	0.342052	0.999994	0.111939	-0.40473	0.686894	0.99975	blue	grey
TXNP5	-0.345509	1.37555	0.173291	0.547192	-0.377527	1.45427	0.150286	0.315691	-0.617646	2.45905	0.0163731	0.083232	-0.124798	0.496667	0.620961	0.999975	-0.424056	1.67912	0.0975301	0.999994	-0.127776	0.502282	0.617026	0.99975	blue	grey
BOLA2B	-0.614949	2.6426	0.0101179	0.170504	-0.569611	2.36837	0.0205964	0.0871268	-0.612118	2.6305	0.0104512	0.0630011	-0.126434	0.543121	0.58875	0.999975	-0.0294538	0.125886	0.900179	0.999994	0.303535	-1.2879	0.201968	0.99975	blue	grey
YWHAZP4	-0.261651	1.55491	0.124421	0.4812	-0.513122	2.9504	0.0042981	0.0318722	-0.610323	3.62704	0.000536606	0.0100624	-0.17475	1.0381	0.30275	0.999975	-0.0421069	0.248872	0.804179	0.999994	-0.156043	0.915607	0.362977	0.99975	blue	grey
AL122020.1	-0.535767	2.34562	0.0217976	0.235861	-0.316533	1.34084	0.184252	0.36093	-0.609713	2.66942	0.00941324	0.0593462	0.0181162	-0.0792848	0.937029	0.999975	-0.141609	0.616615	0.539464	0.999994	0.183487	-0.793173	0.430323	0.99975	blue	grey
SEC22B2	-0.578892	2.03654	0.0454324	0.320637	-0.461511	1.57092	0.120654	0.272804	-0.607989	2.13895	0.0358848	0.135724	0.0173367	-0.0609681	0.951556	0.999975	-0.261305	0.91429	0.363664	0.999994	-0.165917	0.576324	0.566221	0.99975	blue	grey
AC004453.1	-0.505124	2.7894	0.00677669	0.148002	-0.413089	2.20716	0.0305416	0.112288	-0.607921	3.35714	0.00126913	0.0169214	-0.0329534	0.181909	0.856173	0.999975	-0.142497	0.782633	0.436449	0.999994	-0.266689	1.45412	0.150327	0.99975	blue	magenta
TUBBP2	-0.543605	2.63822	0.0102375	0.171456	-0.415955	1.95322	0.0547411	0.163151	-0.607833	2.95	0.00430297	0.0363656	-0.127871	0.620356	0.537012	0.999975	-0.125728	0.606879	0.54587	0.999994	0.0128117	-0.0613924	0.951219	0.99975	blue	blue
RPL10P16	-0.412587	2.73833	0.00780292	0.153102	-0.263924	1.69484	0.094495	0.230759	-0.602291	3.99749	0.000154932	0.0047355	0.0206853	-0.137238	0.891232	0.999975	-0.122541	0.8089	0.421279	0.999994	-0.0655199	0.429363	0.668961	0.99975	blue	magenta
EIF1P5	-0.568252	2.64254	0.0101197	0.170504	-0.140817	0.633595	0.528384	0.706445	-0.598979	2.7855	0.00685047	0.0484492	0.0842251	-0.391528	0.696581	0.999975	-0.0500114	0.231308	0.817742	0.999994	-0.139304	0.639626	0.524477	0.99975	blue	grey
AL080243.2	-0.477444	2.24323	0.0280082	0.262459	-0.517765	2.35376	0.0213607	0.0892646	-0.598941	2.81414	0.00632529	0.0462862	-0.124316	0.583874	0.561158	0.999975	-0.213281	0.996657	0.322321	0.999994	-0.33203	1.54032	0.127935	0.99975	blue	magenta
RPL34P18	-0.281082	1.97691	0.0519421	0.338567	-0.278116	1.8926	0.0624943	0.177137	-0.597062	4.19936	7.66205e-05	0.0031453	0.032795	-0.23057	0.818313	0.999975	-0.055717	0.389747	0.697892	0.999994	0.0160438	-0.111415	0.911602	0.99975	blue	magenta
RPLP0P6	-0.629075	4.17078	8.47479e-05	0.0174726	-0.485242	3.11279	0.00267192	0.0234423	-0.596319	3.9537	0.000180057	0.00512326	0.00234838	-0.0155641	0.987626	0.999975	-0.189339	1.24852	0.215946	0.999994	-0.141943	0.929202	0.355938	0.99975	blue	magenta
EEF1B2P2	-0.505485	2.59591	0.0114601	0.181495	-0.485181	2.41081	0.0185118	0.0811234	-0.595524	3.05838	0.00313883	0.0298092	0.20152	-1.03453	0.304406	0.999975	-0.0703998	0.359579	0.720231	0.999994	-0.00925649	0.0469363	0.962696	0.99975	blue	grey
CYCSP45	-0.348137	1.56025	0.123153	0.478072	-0.448311	1.94403	0.0558612	0.164963	-0.594948	2.66646	0.00948876	0.0595086	-0.120788	0.541142	0.590106	0.999975	-0.0633991	0.282599	0.778308	0.999994	0.0239385	-0.105931	0.915936	0.99975	blue	grey
AC131235.1	-0.322601	1.58081	0.118373	0.471516	-0.460426	2.18299	0.0323495	0.116159	-0.594743	2.91443	0.00476497	0.0387151	-0.019865	0.0973068	0.922757	0.999975	-0.141804	0.691106	0.491756	0.999994	0.0152744	-0.0739024	0.941296	0.99975	blue	magenta
TMSB4XP8	-0.446861	2.36673	0.0206809	0.230113	-0.419199	2.1482	0.0351161	0.122779	-0.594292	3.14765	0.00240779	0.0253394	0.0428888	-0.22707	0.821022	0.999975	-0.0091605	0.0482543	0.961649	0.999994	0.0732513	-0.383065	0.702818	0.99975	blue	grey
AC012354.2	-0.445142	1.82826	0.0717175	0.388662	-0.372035	1.47843	0.143722	0.306199	-0.59279	2.43473	0.017422	0.0862595	-0.241826	0.99285	0.32416	0.999975	-0.595276	2.43164	0.0175594	0.999994	-0.393779	1.59688	0.11474	0.99975	blue	magenta
AC023512.1	-0.297677	1.8002	0.076083	0.396207	-0.351278	2.05544	0.043521	0.140889	-0.591314	3.57606	0.00063323	0.0110999	-0.0163709	0.0989668	0.921444	0.999975	-0.151717	0.912542	0.364576	0.999994	0.0921434	-0.550201	0.583911	0.99975	blue	magenta
RPL30P4	-0.402691	1.7228	0.0892838	0.419926	-0.363328	1.50397	0.13703	0.297021	-0.586474	2.50913	0.0143902	0.0768432	0.0152332	-0.0651471	0.94824	0.999975	0.232974	-0.991316	0.324903	0.999994	-0.193553	0.817609	0.41632	0.99975	blue	grey
AL590867.2	-0.498907	3.2512	0.00176	0.0824719	-0.423273	2.66884	0.00942812	0.052863	-0.584307	3.80781	0.000295138	0.00715984	0.0788215	-0.513464	0.609223	0.999975	-0.0396868	0.257224	0.797751	0.999994	0.0505522	-0.325271	0.745934	0.99975	blue	magenta
FABP5P1	-0.563129	2.76132	0.00732441	0.151249	-0.445813	2.11514	0.0379333	0.128516	-0.584178	2.86461	0.00548932	0.0422495	0.233012	-1.14217	0.257228	0.999975	0.0654807	-0.319348	0.750402	0.999994	0.128122	-0.620318	0.537038	0.99975	blue	grey
YWHAZP5	-0.424297	2.58177	0.0118973	0.182453	-0.562403	3.3111	0.00146404	0.0156859	-0.583153	3.54847	0.000692205	0.0115821	0.186517	-1.13451	0.260403	0.999975	-0.165664	1.00257	0.319476	0.999994	-0.0421061	0.252973	0.801021	0.99975	blue	grey
AL355032.1	-0.355526	2.09924	0.0393569	0.303534	-0.290149	1.65764	0.101809	0.242704	-0.582951	3.44219	0.000971733	0.0143613	-0.150821	0.890213	0.376362	0.999975	-0.115528	0.678454	0.499693	0.999994	0.0391455	-0.22822	0.820132	0.99975	blue	magenta
TXNP6	-0.389562	1.72433	0.0890068	0.419247	-0.528759	2.26453	0.0266011	0.103122	-0.58252	2.57848	0.012001	0.0682366	-0.00509318	0.0225358	0.982084	0.999975	-0.0992619	0.436985	0.66345	0.999994	0.187131	-0.817843	0.416187	0.99975	blue	grey
NACA3P	-0.398581	2.10076	0.0392194	0.303534	-0.289386	1.47576	0.144437	0.306946	-0.581576	3.06532	0.00307528	0.0294113	-0.0353306	0.186145	0.852862	0.999975	-0.180539	0.946392	0.347163	0.999994	-0.147563	0.767925	0.445082	0.99975	blue	grey
COX17P1	-0.296839	1.59636	0.114857	0.466062	-0.310137	1.61376	0.111022	0.257384	-0.579962	3.11903	0.00262279	0.0266737	0.107536	-0.578103	0.565026	0.999975	-0.154386	0.825768	0.411706	0.999994	-0.0336275	0.17856	0.858792	0.99975	blue	grey
AC087343.1	-0.635336	2.94593	0.00435364	0.120296	-0.406336	1.82298	0.0725218	0.193961	-0.575989	2.67082	0.00937779	0.0592073	-0.0339358	0.157296	0.875458	0.999975	-0.244985	1.1298	0.262369	0.999994	-0.217114	0.994005	0.323601	0.99975	blue	magenta
RPS10P3	-0.473982	2.41235	0.01844	0.218353	-0.0800337	0.39412	0.694675	0.828098	-0.57585	2.93088	0.00454585	0.0375678	0.196119	-0.99779	0.321774	0.999975	-0.105113	0.532078	0.596335	0.999994	0.020378	-0.102405	0.918724	0.99975	blue	magenta
AC090543.2	-0.446807	1.70635	0.0923207	0.425958	-0.254061	0.938779	0.351031	0.54816	-0.573772	2.19128	0.0317192	0.125667	0.277665	-1.06001	0.292738	0.999975	-0.037392	0.142026	0.887462	0.999994	0.135788	-0.512023	0.610226	0.99975	blue	grey
TUBAP2	-0.493605	2.86288	0.00551608	0.134394	-0.507017	2.84528	0.00579671	0.0384623	-0.571785	3.31641	0.00144024	0.0185175	0.00668365	-0.0387507	0.969198	0.999975	-0.0019518	0.0112591	0.991048	0.999994	0.035082	-0.200905	0.841348	0.99975	blue	blue
RPS3AP47	-0.448122	2.644	0.0100801	0.170504	-0.363242	2.07366	0.0417449	0.137016	-0.570625	3.36686	0.00123123	0.0165859	-0.0869178	0.512642	0.609795	0.999975	-0.00294171	0.0172626	0.986276	0.999994	0.0900038	-0.524332	0.601683	0.99975	blue	magenta
SELENOTP1	-0.380673	2.76219	0.00730693	0.151073	-0.552957	3.88213	0.000229745	0.00444923	-0.570616	4.14053	9.42502e-05	0.00353503	-0.0851892	0.617913	0.538613	0.999975	-0.0377543	0.272464	0.786057	0.999994	-0.057903	0.414843	0.679509	0.99975	blue	grey
SUMO2P1	-0.549751	3.36714	0.00123016	0.0680729	-0.439366	2.60375	0.0112239	0.0586409	-0.569978	3.49111	0.000831881	0.0129887	-0.0656022	0.401657	0.689145	0.999975	-0.0823216	0.501476	0.617589	0.999994	-0.0934067	0.564878	0.57394	0.99975	blue	magenta
RPSAP12	-0.4163	2.32004	0.0232221	0.241684	-0.358116	1.93103	0.0574778	0.167979	-0.569234	3.17241	0.00223519	0.0241073	0.0258303	-0.1439	0.885988	0.999975	-0.0577342	0.32001	0.749902	0.999994	0.0513722	-0.282682	0.778244	0.99975	blue	magenta
AL161787.1	-0.447736	2.27146	0.0261568	0.253964	-0.345209	1.6945	0.0945584	0.230859	-0.568738	2.88539	0.00517558	0.040876	0.247373	-1.25452	0.213774	0.999975	-0.117304	0.591882	0.555812	0.999994	0.346483	-1.73559	0.0869816	0.99975	blue	magenta
EEF1A1P9	-0.382149	2.47545	0.0156986	0.205587	-0.416878	2.61281	0.0109567	0.0576899	-0.566618	3.67047	0.000465519	0.00924303	-0.0445417	0.288422	0.773865	0.999975	-0.15371	0.990294	0.325398	0.999994	-0.118276	0.756481	0.451868	0.99975	blue	magenta
RPL4P5	-0.56608	2.75128	0.00753009	0.152286	-0.625589	2.94187	0.00440481	0.0324008	-0.566369	2.75275	0.00749964	0.0514344	0.0492071	-0.23907	0.811741	0.999975	0.0853251	-0.412453	0.681252	0.999994	-0.0491313	0.235774	0.814288	0.99975	blue	grey
RPL24P8	-0.441834	2.78971	0.00677075	0.148002	-0.435186	2.6586	0.00969203	0.0537831	-0.561917	3.548	0.000693248	0.0115881	-0.116163	0.733178	0.465867	0.999975	0.0580833	-0.364749	0.716385	0.999994	-0.120413	0.750682	0.455328	0.99975	blue	magenta
AC079250.1	-0.430895	2.69863	0.00869679	0.159583	-0.32903	1.99382	0.0500197	0.154111	-0.556785	3.48715	0.000842458	0.0130755	-0.01873	0.11726	0.906985	0.999975	-0.265191	1.65186	0.102986	0.999994	-0.128074	0.791983	0.431012	0.99975	blue	magenta
PPIAP11	-0.54442	3.7662	0.000339177	0.0365002	-0.499034	3.34023	0.0013377	0.0147522	-0.555538	3.8432	0.000262041	0.00662261	-0.00378711	0.0261889	0.97918	0.999975	-0.0548561	0.377429	0.706982	0.999994	0.109125	-0.745374	0.458509	0.99975	blue	greenyellow
ANXA2P2	-0.49218	2.21967	0.0296407	0.271154	-0.70827	3.09059	0.00285397	0.0244195	-0.55542	2.50494	0.0145473	0.0773198	0.198335	-0.89414	0.374273	0.999975	0.117743	-0.528131	0.599058	0.999994	0.131099	-0.583774	0.561225	0.99975	blue	purple
RPS4XP3	-0.49679	2.52979	0.0136371	0.194636	-0.394852	1.94547	0.0556844	0.164613	-0.552766	2.8149	0.00631187	0.0462079	0.21863	-1.11292	0.269503	0.999975	0.0858076	-0.434589	0.665181	0.999994	0.470403	-2.36517	0.0207614	0.99975	blue	grey
AP000936.3	-0.486333	2.35796	0.0211381	0.232516	-0.394499	1.85066	0.0683843	0.18745	-0.551138	2.67223	0.00934196	0.059083	-0.432525	2.09631	0.0396245	0.999975	-0.540829	2.60798	0.0110983	0.999994	-0.332173	1.59019	0.116242	0.99975	blue	grey
CYP51A1P1	-0.656482	4.38593	3.93499e-05	0.010251	-0.847594	5.47904	6.16218e-07	4.89879e-05	-0.550776	3.6798	0.000451457	0.00905749	-0.059292	0.395982	0.693307	0.999975	-0.0199152	0.132332	0.895097	0.999994	0.0810737	-0.53481	0.594455	0.99975	blue	grey
SUMO2P6	-0.404591	1.62213	0.109215	0.456104	-0.294357	1.14188	0.257345	0.450772	-0.550374	2.20667	0.0305771	0.122809	0.19174	-0.768464	0.444764	0.999975	0.0761482	-0.303648	0.762285	0.999994	-0.0221378	0.0876364	0.930413	0.99975	blue	grey
PTMAP5	-0.524784	2.95536	0.00423715	0.118787	-0.308252	1.67963	0.0974318	0.235385	-0.54994	3.0971	0.00279947	0.02777	-0.0255956	0.144091	0.885838	0.999975	-0.155192	0.869241	0.387649	0.999994	-0.0416666	0.231685	0.81745	0.99975	blue	grey
AC130689.1	-0.539885	3.64474	0.000506472	0.0439559	-0.697008	4.55282	2.1422e-05	0.000793738	-0.548134	3.70051	0.000421687	0.00871848	0.125069	-0.844023	0.401495	0.999975	0.140527	-0.94355	0.348604	0.999994	0.300588	-2.00364	0.0489317	0.99975	blue	grey
UQCRHL	-0.471429	3.41745	0.00105065	0.063995	-0.385267	2.70225	0.00861168	0.0497032	-0.546298	3.96028	0.000176046	0.00506643	-0.0947654	0.686716	0.494502	0.999975	-0.0499783	0.360337	0.719666	0.999994	0.115777	-0.828682	0.410065	0.99975	blue	tan
NPM1P27	-0.320201	2.71998	0.0082052	0.157108	-0.39181	3.22029	0.00193383	0.018873	-0.544687	4.62701	1.62923e-05	0.00124036	0.069046	-0.586304	0.559534	0.999975	-0.0398131	0.336364	0.73759	0.999994	0.0309072	-0.259229	0.796209	0.99975	blue	grey
AC243960.2	-0.385418	1.879	0.0643548	0.37136	-0.691141	3.26017	0.00171236	0.0173526	-0.544159	2.65297	0.00984004	0.0609118	0.171206	-0.834367	0.406877	0.999975	0.153963	-0.746539	0.45781	0.999994	0.254337	-1.2243	0.224894	0.99975	blue	grey
AC073861.1	-0.458458	3.13149	0.00252705	0.0961954	-0.394465	2.60698	0.011128	0.0582115	-0.540155	3.68961	0.000437118	0.00888036	0.0108641	-0.0741797	0.941076	0.999975	-0.144216	0.979729	0.330551	0.999994	-0.0599151	0.404081	0.687369	0.99975	blue	magenta
TUBA1C	-0.4631	2.77973	0.00696086	0.149579	-0.501945	2.91516	0.00475508	0.0339345	-0.536724	3.22173	0.00192538	0.0222239	-0.0263654	0.158199	0.87475	0.999975	0.0983318	-0.587035	0.559045	0.999994	0.064514	-0.382352	0.703344	0.99975	blue	red
RPL14P1	-0.323919	2.02947	0.0461654	0.321563	-0.325944	1.97591	0.0520577	0.158092	-0.536302	3.36021	0.00125706	0.0167824	0.0399174	-0.250006	0.803306	0.999975	0.0248682	-0.154964	0.87729	0.999994	-0.0842783	0.521367	0.603736	0.99975	blue	magenta
HSP90AB2P	-0.507906	2.30981	0.0238145	0.24353	-0.444011	1.95373	0.0546797	0.163126	-0.53378	2.42754	0.0177436	0.0872	-0.153071	0.695867	0.488787	0.999975	-0.0714096	0.322991	0.747652	0.999994	-0.118617	0.532625	0.595958	0.99975	blue	grey
AC024293.1	-0.290751	1.93639	0.056807	0.352618	-0.308591	1.98853	0.0506143	0.155228	-0.533678	3.55435	0.000679202	0.0114874	-0.0672571	0.447764	0.655688	0.999975	-0.134221	0.88906	0.376978	0.999994	-0.0902631	0.593556	0.554698	0.99975	blue	magenta
AC099560.2	-0.359134	2.39456	0.0192866	0.223287	-0.340745	2.19824	0.0311977	0.113753	-0.531583	3.54446	0.000701177	0.0116631	0.0877989	-0.585193	0.560276	0.999975	-0.0649033	0.430405	0.668206	0.999994	0.0348016	-0.229113	0.819441	0.99975	blue	magenta
GAPDHP63	-0.631433	3.203	0.00203798	0.0877684	-0.585796	2.87511	0.00532865	0.0364713	-0.531086	2.69405	0.00880576	0.0569331	0.0902096	-0.45743	0.648761	0.999975	-0.0703424	0.354886	0.723729	0.999994	-0.067405	0.337601	0.736662	0.99975	blue	grey
PPIAP31	-0.388244	2.87452	0.0053376	0.13156	-0.436508	3.12702	0.00256102	0.0228121	-0.530707	3.9294	0.000195644	0.00540686	0.0694423	-0.513956	0.608881	0.999975	-0.0648253	0.477361	0.634574	0.999994	0.0427554	-0.312559	0.755533	0.99975	blue	greenyellow
ANXA2P1	-0.488046	1.87164	0.0653821	0.373143	-0.67043	2.48767	0.0152119	0.0718901	-0.530005	2.0326	0.0458392	0.158829	0.295016	-1.13096	0.261882	0.999975	0.233256	-0.889687	0.376643	0.999994	0.204962	-0.776098	0.440272	0.99975	blue	purple
RPS26P6	-0.432342	2.50605	0.0145057	0.198726	-0.271193	1.52096	0.132717	0.290781	-0.528735	3.06486	0.00307946	0.0294113	-0.176701	1.02387	0.30938	0.999975	-0.0992791	0.57235	0.568896	0.999994	-0.0619338	0.354463	0.724044	0.99975	blue	greenyellow
EIF4A1P2	-0.475243	2.5972	0.0114208	0.181495	-0.418593	2.2134	0.0300893	0.111294	-0.527824	2.88462	0.00518687	0.0408889	-0.12612	0.688993	0.493076	0.999975	-0.0257698	0.140069	0.889002	0.999994	-0.065967	0.355957	0.72293	0.99975	blue	grey
COX6A1P2	-0.408892	2.53938	0.0133	0.191993	-0.353237	2.12257	0.0372836	0.127243	-0.527021	3.27308	0.00164594	0.0200943	-0.129844	0.806085	0.422889	0.999975	-0.026229	0.16201	0.871759	0.999994	0.0028768	-0.0176404	0.985975	0.99975	blue	grey
FAUP1	-0.579881	2.5	0.0147349	0.199537	-0.457645	1.909	0.0603096	0.173147	-0.526763	2.27105	0.026183	0.111368	-0.457969	1.97368	0.0523156	0.999975	-0.224089	0.960863	0.339887	0.999994	-0.181779	0.773792	0.441626	0.99975	blue	grey
MRPS36P1	-0.0280504	0.10807	0.914246	0.978802	-0.348681	1.29978	0.197886	0.378622	-0.526513	2.02855	0.046262	0.159803	0.181622	-0.699477	0.486542	0.999975	0.10551	-0.404297	0.687211	0.999994	0.0932044	-0.354554	0.723976	0.99975	blue	grey
RPS28P7	-0.414115	2.57694	0.0120501	0.182835	-0.335768	2.02162	0.0469912	0.14801	-0.526331	3.27531	0.00163471	0.0200149	-0.0302328	0.188063	0.851365	0.999975	-0.208261	1.28894	0.201609	0.999994	-0.119668	0.735262	0.464605	0.99975	blue	magenta
PPIAP19	-0.242654	1.39041	0.168753	0.541396	-0.591113	3.27722	0.00162515	0.0167694	-0.526263	3.01558	0.00355829	0.0322378	0.24659	-1.41245	0.162191	0.999975	-0.260274	1.4833	0.142427	0.999994	0.0677791	-0.383472	0.702517	0.99975	blue	grey
RBMXP2	-0.279846	1.74843	0.0847178	0.412303	-0.356031	2.15226	0.0347825	0.121865	-0.525607	3.28399	0.00159167	0.0196828	0.115316	-0.720215	0.473761	0.999975	-0.0815371	0.506672	0.613957	0.999994	0.261646	-1.61408	0.110952	0.99975	blue	grey
SRP14P2	-0.142319	0.842413	0.40239	0.757619	-0.0792626	0.453951	0.651251	0.798956	-0.523972	3.10157	0.00276257	0.0275905	0.0424554	-0.25121	0.802379	0.999975	-0.0961523	0.566062	0.573139	0.999994	-0.0813207	0.475275	0.636052	0.99975	blue	grey
TRMT112P6	-0.535041	2.50516	0.014539	0.198861	-0.357007	1.61735	0.110245	0.256073	-0.523434	2.45088	0.0167193	0.0840581	-0.0874307	0.409217	0.683614	0.999975	-0.290092	1.35091	0.18102	0.999994	-0.0914927	0.422977	0.673593	0.99975	blue	magenta
FTH1P12	-0.674122	3.63716	0.000519175	0.0439559	-0.445916	2.32785	0.0227788	0.0931223	-0.522684	2.82016	0.00621987	0.0458125	0.0195346	-0.105359	0.916389	0.999975	0.054977	-0.295016	0.768844	0.999994	0.113859	-0.606559	0.546081	0.99975	blue	pink
PPIAP6	-0.479843	2.19265	0.0316156	0.279687	-0.380638	1.68291	0.0967916	0.23444	-0.521984	2.38528	0.0197421	0.0931696	-0.209411	0.956561	0.34204	0.999975	-0.468334	2.12847	0.0367743	0.999994	-0.11366	0.512815	0.609675	0.99975	blue	turquoise
AC020898.1	-0.352879	1.62721	0.108128	0.455154	-0.702333	3.13357	0.00251136	0.0225477	-0.520139	2.39855	0.0190935	0.0913031	-0.0160622	0.0740399	0.941187	0.999975	0.033622	-0.1542	0.87789	0.999994	-0.171656	0.781556	0.437078	0.99975	blue	grey
RPS18P12	-0.627317	3.5967	0.000592257	0.0474123	-0.554261	3.07475	0.00299091	0.0252338	-0.519024	2.97588	0.00399333	0.0346126	-0.20707	1.1868	0.239268	0.999975	-0.374001	2.13271	0.036412	0.999994	-0.318139	1.80101	0.0759537	0.99975	blue	magenta
AC018475.1	-0.336325	1.77075	0.0809004	0.405887	-0.358586	1.82671	0.0719527	0.193117	-0.517105	2.72263	0.00814591	0.054009	-0.0243296	0.128049	0.898473	0.999975	0.0385016	-0.201613	0.840796	0.999994	-0.155817	0.810019	0.42064	0.99975	blue	magenta
PSME2P2	-0.757204	3.76579	0.000339641	0.0365002	-0.500873	2.41017	0.0185418	0.0812338	-0.514559	2.55911	0.0126295	0.0704598	-0.0195655	0.0972692	0.922787	0.999975	-0.243878	1.2063	0.23171	0.999994	-0.115677	0.568028	0.57181	0.99975	blue	grey
RPS11P5	-0.368166	1.64582	0.104228	0.447603	-0.277134	1.19868	0.234642	0.423898	-0.512362	2.29047	0.0249711	0.108198	-0.423574	1.89282	0.0624647	0.999975	-0.115113	0.511806	0.610377	0.999994	-0.0906182	0.399976	0.690376	0.99975	blue	grey
RPL13P12	-0.466345	3.36183	0.00125071	0.0685406	-0.222199	1.54984	0.125632	0.280465	-0.511534	3.68769	0.000439895	0.0088898	0.0233509	-0.168273	0.866848	0.999975	0.00385486	-0.0276388	0.978028	0.999994	-0.0369094	0.262716	0.793531	0.99975	blue	magenta
POLR2L	-0.238386	2.27351	0.0260262	0.253451	-0.257004	2.37156	0.0204324	0.0867266	-0.511506	4.87842	6.34903e-06	0.000702668	0.0428896	-0.408895	0.68385	0.999975	0.100309	-0.951482	0.344592	0.999994	0.150505	-1.41726	0.160787	0.99975	blue	greenyellow
AC115223.1	-0.308565	2.03321	0.0457759	0.320637	-0.193312	1.23246	0.221849	0.407261	-0.511307	3.36921	0.00122225	0.0165043	0.0296088	-0.195028	0.845929	0.999975	-0.054392	0.356461	0.722554	0.999994	0.134652	-0.87605	0.383962	0.99975	blue	grey
AL109766.1	-0.482431	2.21925	0.0296707	0.271268	-0.423398	1.8845	0.0635964	0.178781	-0.51122	2.35174	0.0214682	0.0976927	0.074443	-0.342323	0.733121	0.999975	-0.127674	0.58414	0.56098	0.999994	0.168633	-0.76594	0.446255	0.99975	blue	grey
AC024940.3	-0.453635	2.01573	0.047619	0.326715	-0.611476	2.62896	0.0104945	0.0563242	-0.508843	2.26111	0.0268228	0.112985	-0.0081	0.0359793	0.9714	0.999975	-0.603535	2.66729	0.00946746	0.999994	0.044571	-0.195551	0.845521	0.99975	blue	magenta
YWHAZP2	-0.422986	3.04421	0.00327232	0.106535	-0.502487	3.49905	0.00081106	0.0105078	-0.508353	3.65868	0.000483874	0.00938335	-0.0624126	0.449016	0.65479	0.999975	0.0226743	-0.162302	0.87153	0.999994	-0.0761131	0.540865	0.590296	0.99975	blue	grey
RPL13AP20	-0.447387	2.00525	0.0487544	0.32996	-0.28328	1.22851	0.223318	0.409248	-0.508032	2.27713	0.0257981	0.11048	-0.124881	0.559529	0.577564	0.999975	-0.354814	1.58172	0.118166	0.999994	-0.17933	0.793632	0.430058	0.99975	blue	brown
PPIAP29	-0.432592	2.98729	0.00386351	0.113185	-0.510608	3.41165	0.00107	0.0126172	-0.505428	3.49035	0.000833903	0.0130023	0.0508225	-0.35083	0.726756	0.999975	-0.077226	0.530401	0.597492	0.999994	0.0471213	-0.321291	0.748935	0.99975	blue	grey
AP001324.1	-0.301917	1.70226	0.0930875	0.42798	-0.242929	1.32524	0.189345	0.367893	-0.504308	2.84345	0.00582658	0.0439864	-0.0596157	0.336002	0.737862	0.999975	-0.083433	0.467863	0.641317	0.999994	-0.0752967	0.419176	0.676355	0.99975	blue	magenta
BANF1P3	-0.329619	1.5157	0.134042	0.493074	-0.219041	0.974548	0.333098	0.530058	-0.504058	2.31789	0.0233458	0.103296	0.0729038	-0.335114	0.738529	0.999975	0.0951969	-0.435376	0.664612	0.999994	-0.0275745	0.125196	0.900723	0.99975	blue	magenta
AC046176.1	-0.267126	2.04758	0.0443072	0.31849	-0.372773	2.76469	0.00725661	0.044666	-0.502833	3.85442	0.000252316	0.00644414	-0.094293	0.722513	0.472356	0.999975	-0.189862	1.44745	0.152178	0.999994	-0.0547047	0.414029	0.680103	0.99975	blue	grey
RPL23AP65	-0.584692	3.10344	0.00274729	0.0989785	-0.490036	2.51664	0.0141122	0.0683332	-0.502514	2.66732	0.00946688	0.0594595	-0.316756	1.68067	0.0972283	0.999975	-0.349836	1.84681	0.0689478	0.999994	-0.229489	1.2027	0.233092	0.99975	blue	magenta
TMSB10	-0.293734	2.05013	0.0440512	0.318225	-0.281898	1.90369	0.0610099	0.174419	-0.501066	3.49729	0.000815637	0.0128966	0.0159627	-0.111372	0.911636	0.999975	-0.0174334	0.121018	0.904019	0.999994	0.122307	-0.842867	0.402137	0.99975	blue	blue
PTMAP2	-0.29658	1.56243	0.122639	0.477241	-0.299332	1.52578	0.131514	0.289086	-0.50015	2.63494	0.0103278	0.0625917	-0.0998979	0.526088	0.600469	0.999975	-0.129828	0.680254	0.498559	0.999994	-0.169544	0.881907	0.380807	0.99975	blue	magenta
HNRNPCP2	-0.313649	2.77467	0.00705904	0.149866	-0.4786	4.09655	0.000109919	0.00265515	-0.499466	4.4186	3.49633e-05	0.00201372	-0.01912	0.169082	0.866214	0.999975	-0.100824	0.887099	0.378025	0.999994	-0.0992592	0.867003	0.388865	0.99975	blue	magenta
FTLP2	-0.570772	2.98993	0.00383407	0.113041	-0.340641	1.72652	0.0886086	0.220876	-0.498199	2.60982	0.0110442	0.0650472	0.347334	-1.81881	0.0731638	0.999975	0.0154748	-0.0806241	0.935968	0.999994	0.0270484	-0.139901	0.889135	0.99975	blue	grey
AC026410.3	-0.451305	2.70515	0.00854388	0.157941	-0.720944	4.18119	8.16944e-05	0.00212218	-0.497749	2.98361	0.00390495	0.0342427	-0.0726979	0.435597	0.664453	0.999975	-0.0710218	0.423404	0.673283	0.999994	0.212379	-1.25694	0.212901	0.99975	blue	grey
SMIM4	-0.309802	2.20643	0.0305946	0.27425	-0.195049	1.34409	0.183205	0.359844	-0.496647	3.53725	0.00071764	0.0118323	0.0535134	-0.380987	0.704352	0.999975	-0.0121964	0.0863935	0.931397	0.999994	0.13334	-0.937665	0.3516	0.99975	blue	greenyellow
AL049873.1	-0.458805	2.83683	0.00593591	0.138642	-0.335839	2.00916	0.0483286	0.150746	-0.495897	3.06625	0.00306691	0.0293899	-0.122135	0.754896	0.452812	0.999975	-0.167234	1.02842	0.307247	0.999994	-0.196437	1.19925	0.234423	0.99975	blue	grey
H3F3C	-0.234064	1.70527	0.0925231	0.426775	-0.44322	3.12431	0.00258181	0.0229268	-0.494385	3.60191	0.000582337	0.0105877	0.0659706	-0.48045	0.632386	0.999975	-0.0172142	0.124734	0.901087	0.999994	0.0465784	-0.33506	0.738569	0.99975	blue	grey
GAPDHP65	-0.570538	2.89583	0.0050243	0.12698	-0.368433	1.80936	0.0746338	0.197496	-0.493893	2.50687	0.0144746	0.0771278	0.058438	-0.296501	0.767715	0.999975	-0.0890942	0.449759	0.654256	0.999994	-0.0469909	0.235496	0.814503	0.99975	blue	grey
PFN1P1	-0.59448	2.86065	0.00555102	0.134765	-0.430426	2.00403	0.0488888	0.152091	-0.493677	2.37564	0.0202248	0.0942653	0.159279	-0.766172	0.446118	0.999975	0.0634009	-0.303434	0.762448	0.999994	0.142321	-0.676203	0.501112	0.99975	blue	pink
AC115837.1	-0.24585	1.18994	0.238039	0.623854	-0.379785	1.77857	0.0795976	0.206204	-0.49223	2.3825	0.0198799	0.0933557	-0.303501	1.46844	0.146408	0.999975	-0.373933	1.80007	0.0761035	0.999994	-0.0129351	0.0618168	0.950883	0.99975	blue	magenta
RPL26P19	-0.345791	2.03455	0.0456379	0.320637	-0.167304	0.952439	0.34411	0.541727	-0.492141	2.8957	0.00502623	0.0401269	-0.0885711	0.520939	0.604032	0.999975	-0.342198	2.0025	0.0490566	0.999994	-0.112061	0.65101	0.517144	0.99975	blue	magenta
RPS19P3	-0.444139	2.2668	0.0264547	0.255937	-0.181436	0.895971	0.3733	0.570473	-0.492073	2.51151	0.0143017	0.0767093	0.12275	-0.626262	0.533154	0.999975	-0.0268698	0.136395	0.891895	0.999994	-0.0706141	0.35585	0.72301	0.99975	blue	magenta
RPS26P47	-0.419818	1.70841	0.0919352	0.425557	-0.393518	1.54944	0.12573	0.280646	-0.491419	1.99983	0.0493508	0.166269	-0.306185	1.24554	0.217035	0.999975	-0.517229	2.09342	0.0398901	0.999994	0.151212	-0.607572	0.545413	0.99975	blue	turquoise
RPL5P1	-0.429845	2.31654	0.0234232	0.24269	-0.423057	2.206	0.0306261	0.112436	-0.489985	2.64072	0.0101692	0.0619181	-0.00801286	0.0431675	0.965689	0.999975	-0.138626	0.743042	0.459911	0.999994	-0.178299	0.948766	0.345963	0.99975	blue	grey
GAPDHP40	-0.509525	2.33157	0.0225698	0.239909	-0.456187	2.01978	0.0471866	0.148297	-0.489607	2.24048	0.0281944	0.116669	0.0209509	-0.0958356	0.923922	0.999975	-0.0459354	0.209061	0.835	0.999994	-0.101619	0.459134	0.647542	0.99975	blue	grey
CALM2P2	-0.329337	2.89266	0.00506992	0.127562	-0.459918	3.90854	0.000210045	0.00419917	-0.486599	4.27404	5.87841e-05	0.002683	-0.0133063	0.116831	0.907325	0.999975	-0.16782	1.46603	0.147062	0.999994	-0.0558123	0.484025	0.62986	0.99975	blue	blue
RPL12P4	-0.550261	3.01122	0.00360378	0.109164	-0.26886	1.42357	0.158958	0.327569	-0.486365	2.66162	0.00961337	0.0600454	0.0434308	-0.237582	0.812891	0.999975	0.16239	-0.883842	0.379769	0.999994	0.0706085	-0.381516	0.703962	0.99975	blue	magenta
HSPA8P1	-0.373752	2.44601	0.0169284	0.209409	-0.521268	3.30075	0.00151159	0.0160074	-0.486094	3.1813	0.0021761	0.0238653	-0.0311931	0.204068	0.838885	0.999975	-0.0282051	0.183587	0.854861	0.999994	0.157162	-1.01556	0.313294	0.99975	blue	grey
RPL26P30	-0.37095	1.98953	0.0505012	0.334702	-0.364556	1.89181	0.0626014	0.177203	-0.485397	2.60341	0.0112341	0.0657087	-0.0875988	0.46965	0.640046	0.999975	-0.0950005	0.50676	0.613896	0.999994	-0.0188247	0.0996882	0.920873	0.99975	blue	grey
AC011495.1	-0.421666	2.01504	0.0476938	0.326761	-0.213485	0.987095	0.326953	0.524867	-0.484877	2.31717	0.0233873	0.103399	0.467738	-2.23439	0.0286114	0.999975	0.159447	-0.75783	0.451065	0.999994	0.0881208	-0.415791	0.678819	0.99975	blue	grey
RPS3AP26	-0.296487	2.07769	0.0413604	0.310661	-0.329061	2.23115	0.0288351	0.108204	-0.484491	3.39525	0.00112657	0.0156456	-0.0590643	0.413754	0.680303	0.999975	-0.144838	1.00949	0.316174	0.999994	-0.180607	1.24966	0.215535	0.99975	blue	magenta
AC092115.1	-0.188215	1.01921	0.311569	0.694121	-0.353499	1.85215	0.068168	0.187051	-0.484369	2.62299	0.0106633	0.0638254	0.0939593	-0.508616	0.6126	0.999975	-0.0353664	0.190476	0.84948	0.999994	-0.0107949	0.0577179	0.954136	0.99975	blue	grey
EEF1A1P19	-0.334907	2.47859	0.0155721	0.204881	-0.376228	2.69407	0.00880527	0.0504055	-0.484174	3.58337	0.000618418	0.010937	0.0426926	-0.315845	0.753048	0.999975	-0.134022	0.986505	0.32724	0.999994	-0.134486	0.982739	0.329078	0.99975	blue	magenta
HSPA8P9	-0.411461	1.87812	0.0644775	0.37136	-0.561072	2.47794	0.0155981	0.0729821	-0.480786	2.19461	0.0314691	0.124939	-0.229374	1.0466	0.298841	0.999975	-0.312053	1.41666	0.160962	0.999994	-0.0651389	0.293573	0.769942	0.99975	blue	magenta
SUMO1P3	-0.532581	4.72885	1.11522e-05	0.00439328	-0.523979	4.50154	2.5853e-05	0.000898911	-0.480311	4.26484	6.0744e-05	0.00272256	-0.0663059	0.588522	0.558052	0.999975	-0.190693	1.68402	0.0965769	0.999994	-0.0708897	0.62149	0.536271	0.99975	blue	magenta
AC016739.1	-0.491486	2.66089	0.00963226	0.166943	-0.34847	1.82541	0.0721516	0.19331	-0.478404	2.59013	0.0116369	0.0671673	-0.0304666	0.164885	0.869503	0.999975	-0.135819	0.73134	0.466982	0.999994	-0.141165	0.754615	0.452979	0.99975	blue	magenta
RPL5P34	-0.410097	2.3617	0.0209419	0.231438	-0.50384	2.80743	0.00644491	0.0411701	-0.477018	2.74716	0.00761577	0.0520411	-0.208441	1.19995	0.234153	0.999975	-0.280733	1.60795	0.11229	0.999994	-0.0753372	0.42838	0.669673	0.99975	blue	magenta
UBBP4	-0.402874	2.4912	0.0150737	0.201408	-0.375929	2.24917	0.0276092	0.10564	-0.476453	2.94626	0.00434959	0.036588	0.030918	-0.191114	0.848983	0.999975	0.0614779	-0.378095	0.70649	0.999994	0.109299	-0.667324	0.506732	0.99975	blue	grey
AC026403.1	-0.407023	2.42644	0.017793	0.214538	-0.292662	1.68809	0.0957887	0.232744	-0.472971	2.81965	0.00622862	0.0458298	-0.158496	0.94452	0.348112	0.999975	-0.0731209	0.433545	0.665935	0.999994	0.0705878	-0.415491	0.679037	0.99975	blue	grey
AC005912.1	-0.337368	2.46971	0.0159316	0.206097	-0.156412	1.10787	0.27166	0.466057	-0.472795	3.46119	0.000914957	0.0138826	-0.0904933	0.662216	0.509979	0.999975	-0.247719	1.80361	0.075541	0.999994	-0.179277	1.29583	0.199237	0.99975	blue	magenta
YTHDF2P1	-0.378342	2.03575	0.0455136	0.320637	-0.318543	1.65839	0.101658	0.242481	-0.472462	2.54225	0.0132005	0.0727615	0.0577907	-0.310842	0.756833	0.999975	0.0623156	-0.333487	0.739751	0.999994	0.149921	-0.796499	0.428401	0.99975	blue	grey
RPS26P3	-0.448491	2.20618	0.0306126	0.274267	-0.414337	1.97206	0.0525049	0.158904	-0.471642	2.32012	0.0232173	0.102916	0.17492	-0.860142	0.39261	0.999975	0.129943	-0.635746	0.526989	0.999994	0.0700445	-0.340207	0.734706	0.99975	blue	grey
AC010343.1	-0.37809	2.12828	0.0367911	0.297626	-0.180421	0.982649	0.329122	0.526352	-0.471337	2.65323	0.00983302	0.0609057	-0.140603	0.791168	0.431485	0.999975	-0.234807	1.31458	0.192889	0.999994	-0.218136	1.21239	0.229389	0.99975	blue	magenta
AC113935.1	-0.170877	1.4431	0.153398	0.51905	-0.141738	1.15817	0.25068	0.44281	-0.470478	3.97339	0.000168314	0.00493944	-0.0146308	0.123515	0.902049	0.999975	-0.0868667	0.729634	0.468018	0.999994	-0.124696	1.03979	0.301971	0.99975	blue	magenta
RPL15P2	-0.374792	2.17283	0.0331366	0.285071	-0.345157	1.93611	0.0568414	0.166869	-0.469588	2.72247	0.00814935	0.054009	-0.0283514	0.164305	0.869958	0.999975	-0.143294	0.82624	0.41144	0.999994	-0.0359202	0.205615	0.837681	0.99975	blue	magenta
AC007969.1	-0.427696	2.93215	0.00452938	0.121547	-0.297352	1.97242	0.0524623	0.158831	-0.46944	3.21842	0.00194489	0.0223881	0.0561438	-0.384764	0.701564	0.999975	-5.01897e-05	0.000342222	0.999728	0.999994	0.0945968	-0.640338	0.524017	0.99975	blue	magenta
UQCC3	-0.272259	2.27813	0.025735	0.252893	-0.320817	2.59736	0.0114162	0.0593522	-0.466064	3.8999	0.00021631	0.00582598	0.00118441	-0.00990694	0.992123	0.999975	-0.0590626	0.491531	0.624569	0.999994	-0.00587992	0.0485791	0.961391	0.99975	blue	tan
AC022210.1	-0.573099	2.8333	0.0059951	0.138866	-0.38688	1.85062	0.0683911	0.18745	-0.465978	2.30377	0.024171	0.105868	0.239251	-1.18238	0.241005	0.999975	0.0339323	-0.166846	0.867966	0.999994	0.122931	-0.600074	0.55037	0.99975	blue	magenta
RPL21P28	-0.303687	2.43369	0.0174684	0.212953	-0.154609	1.19881	0.234592	0.423852	-0.465155	3.72775	0.00038538	0.00823944	-0.0657983	0.527102	0.599768	0.999975	-0.226301	1.80371	0.0755247	0.999994	-0.00155439	0.0122993	0.990221	0.99975	blue	magenta
EEF1A1P38	-0.474293	2.04981	0.0440834	0.318298	-0.813397	3.40132	0.00110533	0.0128833	-0.464475	2.00743	0.0485171	0.164571	-0.119908	0.518033	0.606048	0.999975	-0.22415	0.963491	0.338576	0.999994	-0.151772	0.64765	0.519303	0.99975	blue	grey
EEF1A1P11	-0.383782	2.81233	0.00635736	0.142205	-0.358145	2.53933	0.0133016	0.0657154	-0.464135	3.40124	0.00110559	0.0155232	0.0377059	-0.276206	0.783193	0.999975	-0.167697	1.22222	0.225672	0.999994	-0.129941	0.940181	0.350317	0.99975	blue	magenta
AC106800.1	-0.289573	1.49528	0.13928	0.501473	-0.220454	1.10144	0.274431	0.469198	-0.459683	2.37374	0.0203213	0.0945073	-0.241941	1.24886	0.215824	0.999975	-0.169804	0.872073	0.386112	0.999994	-0.389255	1.98463	0.0510567	0.99975	blue	grey
ROMO1	-0.303235	3.1597	0.0023223	0.0926202	-0.27062	2.72838	0.00801872	0.047609	-0.457807	4.77046	9.54197e-06	0.00088467	0.0266835	-0.27794	0.781868	0.999975	-0.0132315	0.137125	0.891321	0.999994	0.106951	-1.10036	0.274899	0.99975	blue	tan
ATP5ME	-0.2734	2.64627	0.0100187	0.169987	-0.311603	2.9182	0.00471386	0.033779	-0.456281	4.41651	3.52297e-05	0.00202092	-0.00606194	0.0586527	0.953394	0.999975	-0.029907	0.287905	0.774259	0.999994	0.119768	-1.14461	0.25622	0.99975	blue	tan
RPS21	-0.324984	3.36813	0.00122637	0.0680729	-0.281873	2.82656	0.00610938	0.0397047	-0.455383	4.71971	1.15399e-05	0.00100208	-0.0545147	0.564784	0.574004	0.999975	-0.081791	0.84309	0.402014	0.999994	0.00385439	-0.0394424	0.968649	0.99975	blue	magenta
AC012085.1	-0.306359	1.82182	0.0727008	0.390051	-0.51433	2.95934	0.00418883	0.0314264	-0.454066	2.70025	0.00865869	0.0562831	-0.00967794	0.0575306	0.954284	0.999975	-0.149215	0.882526	0.380475	0.999994	-0.184005	1.0804	0.283624	0.99975	blue	grey
NHP2P1	-0.206098	1.05085	0.296897	0.682695	-0.307303	1.51604	0.133956	0.292416	-0.45331	2.31138	0.0237229	0.104446	0.0326981	-0.166659	0.868112	0.999975	-0.0415758	0.210837	0.833619	0.999994	0.0483645	-0.243486	0.808332	0.99975	blue	grey
HSPA8P5	-0.498617	2.83643	0.00594269	0.138642	-0.488684	2.68974	0.00890948	0.0508645	-0.452743	2.57553	0.012095	0.068611	0.0838474	-0.476799	0.634972	0.999975	0.0741441	-0.419491	0.676126	0.999994	0.319835	-1.79643	0.0766853	0.99975	blue	magenta
RPL24P4	-0.36189	2.35443	0.021325	0.233417	-0.251478	1.58302	0.117868	0.268543	-0.452611	2.94473	0.00436875	0.0366327	-0.153887	1.00081	0.32032	0.999975	-0.11792	0.763024	0.447981	0.999994	-0.138596	0.890313	0.376309	0.99975	blue	grey
RPS23P8	-0.361743	2.48841	0.0151827	0.201639	-0.187628	1.24881	0.215842	0.400005	-0.450398	3.09834	0.00278914	0.0276909	-0.177591	1.22119	0.226058	0.999975	-0.218385	1.49412	0.139581	0.999994	-0.140697	0.955627	0.342508	0.99975	blue	magenta
CSNK2A3	-0.321778	2.02222	0.0469282	0.323989	-0.237878	1.44645	0.152457	0.318829	-0.44864	2.81955	0.00623045	0.0458298	-0.0735891	0.462302	0.64528	0.999975	0.055456	-0.346627	0.729899	0.999994	0.0712508	-0.442122	0.659747	0.99975	blue	grey
PGAM4	-0.517821	3.07056	0.00302817	0.102937	-0.354001	2.03105	0.046001	0.145868	-0.447798	2.6554	0.00977583	0.0607911	0.0321295	-0.19045	0.849501	0.999975	-0.131578	0.775998	0.440331	0.999994	-0.330664	1.936	0.056855	0.99975	blue	grey
RPL35	-0.32593	3.26354	0.0016948	0.0810678	-0.292827	2.83696	0.00593375	0.039035	-0.446803	4.47395	2.85924e-05	0.00175419	0.00826223	-0.0826996	0.934323	0.999975	-0.0134431	0.133877	0.893879	0.999994	0.0363356	-0.359234	0.720488	0.99975	blue	greenyellow
IFI27L1	-0.299751	2.59784	0.0114014	0.181495	-0.31305	2.62509	0.0106035	0.0566312	-0.446024	3.86565	0.000242929	0.00630589	0.0511603	-0.443228	0.658951	0.999975	0.00529344	-0.0456281	0.963735	0.999994	0.0626787	-0.536358	0.59339	0.99975	blue	tan
AC009245.1	-0.418266	2.47068	0.0158922	0.206097	-0.30219	1.72711	0.0885023	0.220741	-0.445727	2.63295	0.0103829	0.0627369	0.0824137	-0.486636	0.628018	0.999975	0.0921668	-0.541476	0.589877	0.999994	0.0628418	-0.366516	0.715072	0.99975	blue	magenta
HIGD1AP1	-0.433932	2.39981	0.019033	0.221807	-0.402957	2.15621	0.0344608	0.121164	-0.445506	2.46388	0.0161718	0.0825309	0.092722	-0.512601	0.609824	0.999975	-0.18701	1.02864	0.307147	0.999994	0.140203	-0.765588	0.446463	0.99975	blue	grey
RPS13P2	-0.311119	2.03783	0.0452993	0.320637	-0.200653	1.27164	0.207656	0.390946	-0.444905	2.9142	0.0047681	0.0387151	-0.146676	0.960376	0.34013	0.999975	-0.213454	1.39055	0.16871	0.999994	-0.18285	1.18255	0.240939	0.99975	blue	magenta
EEF1A1P6	-0.353984	2.6542	0.00980758	0.167523	-0.405395	2.94107	0.00441491	0.032461	-0.444134	3.33023	0.00137987	0.0179457	-0.0620918	0.465399	0.643072	0.999975	-0.199371	1.4868	0.141502	0.999994	-0.163034	1.207	0.231443	0.99975	blue	magenta
AC114491.1	-0.230414	1.61259	0.111276	0.460243	-0.297652	2.01559	0.0476349	0.149227	-0.443534	3.10422	0.00274091	0.0274952	-0.0764844	0.535093	0.59426	0.999975	-0.0402884	0.280438	0.779958	0.999994	0.0913642	-0.631354	0.52984	0.99975	blue	grey
HSPD1P1	-0.26314	1.99671	0.0496967	0.331958	-0.314195	2.30678	0.0239926	0.0960897	-0.44311	3.36241	0.00124846	0.0167248	0.0168015	-0.127444	0.89895	0.999975	-0.0699277	0.52774	0.599328	0.999994	-0.0402545	0.301596	0.763843	0.99975	blue	brown
EEF1B2P3	-0.352467	2.83282	0.00600308	0.138866	-0.39047	3.03645	0.00334762	0.0271084	-0.441804	3.55092	0.000686745	0.0115341	-0.103489	0.831454	0.408509	0.999975	-0.0618615	0.494496	0.622485	0.999994	-0.0451315	0.358147	0.721297	0.99975	blue	grey
COX7CP1	-0.448915	2.6717	0.0093554	0.164661	-0.310488	1.78792	0.0780626	0.20361	-0.439294	2.61451	0.0109072	0.0645859	-0.0075376	0.0448434	0.964358	0.999975	-0.0674266	0.399114	0.691009	0.999994	0.0306118	-0.179885	0.857756	0.99975	blue	green
NME2P1	-0.235993	1.25944	0.212001	0.595919	-0.314776	1.62539	0.108516	0.25338	-0.438058	2.33787	0.0222204	0.0999625	-0.0542788	0.289568	0.772992	0.999975	0.0134512	-0.0713976	0.943282	0.999994	0.0663377	-0.349559	0.727706	0.99975	blue	magenta
CDC42P6	-0.256958	2.10591	0.0387541	0.303041	-0.357546	2.83523	0.00596262	0.0391337	-0.436964	3.58126	0.000622665	0.0109715	-0.0389515	0.319113	0.750579	0.999975	-0.0325714	0.265496	0.791398	0.999994	0.0592811	-0.479707	0.632912	0.99975	blue	salmon
TPT1P9	-0.300885	2.05898	0.0431713	0.314107	-0.187514	1.24155	0.218496	0.403117	-0.435369	2.97934	0.00395361	0.0344552	0.242882	-1.66145	0.101039	0.999975	-0.00650893	0.0442999	0.96479	0.999994	0.0455737	-0.307927	0.759041	0.99975	blue	magenta
NDUFB7	-0.322669	3.77331	0.000331229	0.0364201	-0.256057	2.89721	0.00500469	0.0350329	-0.434071	5.07617	2.98072e-06	0.000437352	-0.0894624	1.0458	0.299208	0.999975	-0.00299174	0.0347961	0.97234	0.999994	0.0987466	-1.14017	0.258054	0.99975	blue	tan
RNF181	-0.34311	3.0175	0.00353836	0.108542	-0.332041	2.82542	0.00612891	0.039778	-0.432627	3.80486	0.000298076	0.00717304	0.0568063	-0.499405	0.619041	0.999975	-0.00686739	0.0600686	0.95227	0.999994	-0.00672299	0.0583792	0.953611	0.99975	blue	pink
C19orf53	-0.268996	2.94209	0.00440198	0.120296	-0.276273	2.92366	0.00464085	0.0334683	-0.431896	4.7239	1.13606e-05	0.00099159	0.0358412	-0.391863	0.696335	0.999975	-0.00441678	0.0480461	0.961815	0.999994	0.0665289	-0.718459	0.474835	0.99975	blue	greenyellow
RPL3P2	-0.329601	1.89277	0.0624714	0.366174	-0.282874	1.57173	0.120465	0.272596	-0.431662	2.47892	0.0155588	0.0807654	-0.0588462	0.337807	0.736507	0.999975	-0.22014	1.25733	0.212761	0.999994	-0.13802	0.782586	0.436477	0.99975	blue	magenta
FIS1	-0.265535	3.09135	0.00284761	0.100877	-0.272861	3.07358	0.00300125	0.0252644	-0.431378	5.0222	3.66835e-06	0.000492986	-0.00651169	0.0757811	0.939807	0.999975	-0.00789565	0.091423	0.927414	0.999994	0.111867	-1.28591	0.202658	0.99975	blue	greenyellow
LYPLA2P1	-0.357526	1.74825	0.0847489	0.412303	-0.297258	1.4064	0.163974	0.334286	-0.431316	2.10913	0.0384665	0.141938	0.000107131	-0.000523664	0.999584	0.999975	-0.00735004	0.035746	0.971585	0.999994	-0.000569968	0.00275187	0.997812	0.99975	blue	grey
RPL13AP5	-0.342415	2.66515	0.00952228	0.165835	-0.255231	1.92212	0.0586095	0.170077	-0.430958	3.35441	0.00128	0.0169595	0.0447806	-0.348418	0.728559	0.999975	-0.173567	1.34363	0.183354	0.999994	-0.103095	0.792296	0.430831	0.99975	blue	magenta
RPS7P10	-0.407538	2.03704	0.0453804	0.320637	-0.485831	2.34961	0.0215825	0.0897267	-0.430678	2.15276	0.0347421	0.132886	0.0801194	-0.400324	0.690122	0.999975	-0.0778999	0.387267	0.699718	0.999994	-0.0619005	0.305497	0.760883	0.99975	blue	grey
TPI1P1	-0.383598	2.12064	0.0374513	0.298713	-0.290157	1.55203	0.125107	0.279698	-0.428998	2.37168	0.0204264	0.0949176	0.0610369	-0.337306	0.736883	0.999975	-0.147303	0.809924	0.420694	0.999994	-0.225833	1.23271	0.221758	0.99975	blue	lightcyan
AP001816.1	0.0105379	-0.0691256	0.945084	0.985373	-0.164066	1.04131	0.301269	0.497939	-0.427884	2.80686	0.00645518	0.0469526	-0.0912764	0.598527	0.551396	0.999975	-0.242424	1.58162	0.118188	0.999994	-0.0776757	0.503095	0.616457	0.99975	blue	brown
PSMA6P1	-0.356909	2.54164	0.0132213	0.191993	-0.323802	2.23107	0.0288406	0.108204	-0.427629	3.04533	0.00326153	0.0305762	0.0818525	-0.58268	0.561957	0.999975	-0.115671	0.819261	0.415383	0.999994	0.0633422	-0.445381	0.657401	0.99975	blue	grey
RPS29	-0.302251	3.1275	0.00255731	0.0964432	-0.239166	2.39445	0.0192918	0.0833339	-0.427555	4.42417	3.42647e-05	0.00198907	-0.0453962	0.469559	0.640111	0.999975	-0.127722	1.31442	0.19294	0.999994	-0.00474685	0.0484971	0.961456	0.99975	blue	magenta
AC018521.5	-0.257267	1.68163	0.0970408	0.436787	-0.276294	1.74742	0.0848952	0.215038	-0.426069	2.78507	0.00685847	0.0484699	-0.0376669	0.24612	0.8063	0.999975	0.0413888	-0.269074	0.788654	0.999994	0.0774746	-0.50002	0.61861	0.99975	blue	brown
PGAM1P8	-0.285136	1.4678	0.146582	0.511503	-0.366658	1.82622	0.0720276	0.193179	-0.425684	2.19135	0.0317135	0.125667	-0.0181046	0.0931631	0.926037	0.999975	-0.0716492	0.366832	0.714837	0.999994	-0.00354323	0.0180092	0.985682	0.99975	blue	grey
COPS8P2	-0.399349	1.95592	0.0544153	0.345876	-0.667442	3.16293	0.00229986	0.021165	-0.424359	2.07847	0.0412871	0.148844	0.155314	-0.760414	0.449529	0.999975	-0.0569446	0.277392	0.782287	0.999994	0.0667085	-0.322598	0.747949	0.99975	blue	grey
MRPL41	-0.327723	3.40682	0.00108637	0.065008	-0.28793	2.89606	0.00502108	0.0350896	-0.423807	4.40576	3.66273e-05	0.00205368	0.0226051	-0.234904	0.81496	0.999975	0.0889786	-0.919962	0.360712	0.999994	0.16943	-1.73906	0.0863647	0.99975	blue	pink
UQCRFS1P1	-0.355694	2.9337	0.00450924	0.12143	-0.372068	2.9692	0.00407121	0.0307621	-0.423769	3.49526	0.000820937	0.0129071	-0.0807666	0.665905	0.507632	0.999975	-0.150765	1.23675	0.220263	0.999994	-0.0364689	0.296991	0.767342	0.99975	blue	tan
EEF1A1P5	-0.355944	2.77486	0.00705548	0.149866	-0.396077	2.98756	0.00386051	0.0295391	-0.423716	3.30328	0.00149985	0.018995	0.0484936	-0.377907	0.706629	0.999975	-0.0857364	0.664762	0.508359	0.999994	-0.117666	0.905713	0.368156	0.99975	blue	magenta
FKBP1C	-0.483905	3.00352	0.00368553	0.110981	-0.40596	2.43799	0.0172783	0.0777474	-0.422079	2.61984	0.0107532	0.064114	-0.191127	1.18586	0.239637	0.999975	-0.0286547	0.176892	0.860097	0.999994	-0.15244	0.934224	0.353359	0.99975	blue	grey
CHCHD5	-0.279676	2.26072	0.026848	0.257374	-0.271364	2.12236	0.0373015	0.127243	-0.422055	3.4117	0.00106985	0.0151988	0.109538	-0.885108	0.379091	0.999975	0.0272888	-0.21939	0.826977	0.999994	0.0615234	-0.491035	0.624918	0.99975	blue	grey
FTH1P23	-0.494319	2.77084	0.00713442	0.150096	-0.340313	1.8457	0.0691118	0.188571	-0.421372	2.362	0.0209264	0.096376	0.0875928	-0.49081	0.625077	0.999975	-0.0328267	0.183009	0.855313	0.999994	0.131124	-0.725715	0.470402	0.99975	blue	pink
FTLP3	-0.489498	2.90394	0.00490967	0.125563	-0.359797	2.06525	0.0425569	0.138713	-0.421095	2.4982	0.0148034	0.0782416	0.287955	-1.70767	0.0920742	0.999975	0.0110779	-0.0653634	0.948069	0.999994	0.0121877	-0.0713903	0.943288	0.99975	blue	grey
RAB33A	-0.403663	2.44948	0.0167789	0.20891	-0.520741	3.05742	0.00314769	0.0260635	-0.41746	2.53327	0.013514	0.0739616	-0.166992	1.01296	0.314523	0.999975	-0.311593	1.88055	0.0641408	0.999994	0.0136044	-0.0815109	0.935265	0.99975	blue	blue
POTEI	-0.592239	3.02655	0.00344609	0.108125	-0.422149	2.08734	0.0404527	0.134127	-0.417408	2.13315	0.036375	0.136784	0.00535204	-0.0273408	0.978265	0.999975	-0.0366789	0.186427	0.852642	0.999994	-0.0170083	0.0858207	0.931851	0.99975	blue	black
BX679664.3	-0.277774	1.72489	0.088905	0.419106	-0.281383	1.69061	0.0953036	0.232031	-0.414706	2.57525	0.0121038	0.0686381	0.080445	-0.499354	0.619076	0.999975	0.0404158	-0.24961	0.803611	0.999994	-0.157767	0.967311	0.336677	0.99975	blue	grey
C12orf57	-0.290396	3.17298	0.00223136	0.091045	-0.261755	2.76726	0.00720527	0.0444335	-0.414644	4.53069	2.32355e-05	0.00151892	-0.0971586	1.06121	0.292197	0.999975	-0.0772817	0.839839	0.403822	0.999994	0.0346617	-0.373946	0.709561	0.99975	blue	greenyellow
RPL35P5	-0.279067	1.68149	0.0970683	0.436794	-0.20517	1.19613	0.235631	0.42505	-0.413941	2.49422	0.0149566	0.0786275	0.0643845	-0.387801	0.699325	0.999975	-0.176162	1.0557	0.294691	0.999994	0.0128096	-0.0762082	0.939468	0.99975	blue	magenta
TMEM183B	-0.345645	2.36201	0.0209259	0.231438	-0.538684	3.56174	0.000663201	0.00918044	-0.413871	2.82831	0.00607954	0.0452704	0.00742037	-0.0506895	0.959716	0.999975	0.0848201	-0.57649	0.56611	0.999994	-0.0196686	0.132711	0.894798	0.99975	blue	grey
AL590139.1	-0.427762	2.68616	0.00899649	0.162188	-0.362883	2.20482	0.0307124	0.11253	-0.413697	2.5979	0.0113997	0.066334	0.0660502	-0.414614	0.679676	0.999975	-0.0790377	0.493634	0.623091	0.999994	-0.0176052	0.109157	0.913386	0.99975	blue	magenta
EEF1A1P12	-0.405472	2.64654	0.0100115	0.169987	-0.454259	2.86879	0.00542481	0.0369133	-0.413309	2.69776	0.00871752	0.0565353	0.28987	-1.89131	0.0626686	0.999975	-0.0226725	0.147183	0.883405	0.999994	-0.0343725	0.221518	0.825326	0.99975	blue	magenta
YWHAZP3	-0.325374	2.55697	0.0127007	0.187499	-0.586652	4.46067	3.00093e-05	0.000988481	-0.413124	3.24663	0.00178474	0.021178	0.0950744	-0.746874	0.45761	0.999975	0.0398123	-0.311172	0.756583	0.999994	-0.0207677	0.161143	0.872439	0.99975	blue	grey
ACTBP2	-0.508548	2.75729	0.00740626	0.151816	-0.375835	1.97163	0.0525547	0.158966	-0.413092	2.2398	0.0282412	0.116693	0.0795507	-0.431158	0.667662	0.999975	0.0337046	-0.181753	0.856295	0.999994	0.0419219	-0.224426	0.823071	0.99975	blue	grey
ANAPC11	-0.357174	4.26554	6.05922e-05	0.0144593	-0.292979	3.38539	0.00116195	0.0134054	-0.412567	4.92718	5.27525e-06	0.000599502	0.0382141	-0.456204	0.649638	0.999975	0.0318443	-0.378239	0.706383	0.999994	0.0773372	-0.911934	0.364894	0.99975	blue	greenyellow
RPS7P1	-0.332573	2.15055	0.0349224	0.292384	-0.37921	2.37258	0.0203805	0.0866592	-0.412532	2.66766	0.00945802	0.0594479	0.146929	-0.949757	0.345462	0.999975	0.00734836	-0.0472602	0.962439	0.999994	0.0954359	-0.609335	0.54425	0.99975	blue	magenta
AL583856.1	-0.295822	1.64548	0.104299	0.447677	-0.358022	1.92685	0.0580062	0.169086	-0.410624	2.28411	0.0253627	0.109446	-0.0059992	0.0333577	0.973483	0.999975	-0.097509	0.539446	0.59127	0.999994	-0.00660732	0.0362884	0.971154	0.99975	blue	grey
RPSAP15	-0.413463	2.28612	0.0252385	0.250506	-0.202177	1.08161	0.283089	0.478303	-0.409905	2.2665	0.026474	0.112099	-0.0876839	0.484644	0.629423	0.999975	-0.232375	1.27789	0.205456	0.999994	-0.0788966	0.430726	0.667974	0.99975	blue	magenta
CENPX	-0.255397	2.91053	0.00481833	0.125413	-0.31449	3.46769	0.00089626	0.0113088	-0.409788	4.6701	1.38844e-05	0.00111424	-0.0424554	0.483649	0.630125	0.999975	-0.0245274	0.278002	0.78182	0.999994	0.102725	-1.15588	0.25161	0.99975	blue	turquoise
AP002784.2	-0.234494	1.44214	0.153665	0.519365	-0.261125	1.55382	0.12468	0.279159	-0.408139	2.51012	0.0143533	0.076829	0.205088	-1.26083	0.211503	0.999975	0.0327674	-0.200429	0.841719	0.999994	0.106659	-0.647668	0.519291	0.99975	blue	grey
EIF4A1P10	-0.272421	1.85139	0.0682782	0.379505	-0.335296	2.20477	0.030716	0.11253	-0.40811	2.77361	0.00707988	0.0494378	0.0770392	-0.523372	0.602347	0.999975	0.12639	-0.854304	0.395814	0.999994	-0.0247333	0.165967	0.868655	0.99975	blue	grey
SF3B5	-0.294217	3.11883	0.0026243	0.0973744	-0.260666	2.67353	0.00930926	0.0523886	-0.40486	4.2918	5.51761e-05	0.00258343	0.0129626	-0.13736	0.891136	0.999975	0.0350838	-0.36989	0.712567	0.999994	0.0737994	-0.772428	0.442428	0.99975	blue	tan
H3F3AP6	-0.299704	1.86488	0.0663365	0.375929	-0.271281	1.63326	0.106847	0.251249	-0.40443	2.5166	0.0141138	0.0760629	-0.0688524	0.428272	0.669751	0.999975	-0.135857	0.840783	0.403296	0.999994	-0.131288	0.806612	0.422588	0.99975	blue	magenta
AL627402.1	-0.46875	3.4733	0.000880429	0.0588271	-0.525814	3.76974	0.000335195	0.00580353	-0.403606	2.99068	0.00382573	0.0337622	0.118492	-0.877669	0.383088	0.999975	-0.0437008	0.322057	0.748357	0.999994	-0.0485178	0.354963	0.723671	0.99975	blue	grey
XRCC6P2	-0.240058	1.58962	0.11637	0.467964	-0.373979	2.39609	0.0192125	0.0831821	-0.402149	2.66302	0.00957715	0.0598634	0.0129777	-0.0859045	0.931785	0.999975	0.00950392	-0.0625924	0.950267	0.999994	-0.0358672	0.234507	0.815267	0.99975	blue	grey
NAA38	-0.303348	2.84766	0.00575798	0.136875	-0.255509	2.32077	0.0231806	0.0939493	-0.399371	3.74916	0.000358962	0.00790416	-0.0187703	0.176141	0.860686	0.999975	-0.0267629	0.249874	0.803407	0.999994	0.113201	-1.04925	0.297628	0.99975	blue	tan
FTH1P8	-0.504794	2.85988	0.00556314	0.134765	-0.317021	1.73779	0.0865893	0.217885	-0.398941	2.26023	0.02688	0.112999	0.108468	-0.614292	0.540989	0.999975	-0.026732	0.150628	0.880697	0.999994	0.0629401	-0.35208	0.725823	0.99975	blue	greenyellow
OST4	-0.256607	2.44845	0.016823	0.208998	-0.256348	2.36664	0.0206854	0.0874136	-0.398604	3.80344	0.000299494	0.00717304	0.00728681	-0.0695028	0.944785	0.999975	-0.0312946	0.296985	0.767346	0.999994	0.0659108	-0.620957	0.536619	0.99975	blue	greenyellow
RPSAP9	-0.268993	1.4363	0.155316	0.520784	-0.323653	1.67209	0.0989145	0.237948	-0.397851	2.12439	0.0371258	0.138683	0.0907344	-0.484302	0.629664	0.999975	0.0957796	-0.508649	0.612578	0.999994	-0.0148291	0.0781807	0.937905	0.99975	blue	grey
AP001000.1	-0.243227	2.79194	0.00672891	0.147975	-0.349754	3.8845	0.000227914	0.00443121	-0.397038	4.55762	2.10476e-05	0.00141428	-0.0521021	0.597849	0.551846	0.999975	-0.150139	1.71408	0.0908837	0.999994	-0.0267617	0.303313	0.76254	0.99975	blue	magenta
MRPL54	-0.249823	2.67574	0.00925396	0.164029	-0.295622	3.06355	0.00309141	0.0257232	-0.39673	4.24929	6.41975e-05	0.00281621	-0.0111379	0.11925	0.905415	0.999975	0.0520672	-0.554647	0.580882	0.999994	0.201643	-2.13243	0.0364361	0.99975	blue	grey
GAPDHP1	-0.458936	2.61335	0.0109409	0.177625	-0.348287	1.91894	0.0590183	0.170878	-0.390916	2.22608	0.029189	0.1193	0.0556446	-0.316745	0.752368	0.999975	-0.047826	0.270864	0.787283	0.999994	-0.0622244	0.349855	0.727485	0.99975	blue	grey
AC008429.2	-0.302196	1.84529	0.0691708	0.381662	-0.415167	2.45289	0.0166335	0.0759381	-0.390738	2.38602	0.0197054	0.093148	0.142248	-0.868292	0.388164	0.999975	-0.0462238	0.280727	0.779737	0.999994	0.124428	-0.7502	0.455617	0.99975	blue	grey
CAP1P2	-0.210731	1.19914	0.234464	0.620637	-0.399902	2.20179	0.0309356	0.112948	-0.3892	2.21476	0.0299915	0.121117	-0.095516	0.543327	0.588609	0.999975	0.086866	-0.491626	0.624502	0.999994	-0.121459	0.682422	0.497196	0.99975	blue	pink
AL078621.1	-0.206848	1.24501	0.217228	0.601918	-0.491543	2.8626	0.00552055	0.037332	-0.388656	2.33936	0.0221387	0.0997999	-0.0337713	0.203193	0.839566	0.999975	-0.0792394	0.474355	0.636704	0.999994	0.0456593	-0.271351	0.78691	0.99975	blue	grey
SELENOW	-0.250111	3.30856	0.00147558	0.0750329	-0.264494	3.38532	0.00116218	0.0134054	-0.385825	5.10396	2.6776e-06	0.000413035	-0.0439114	0.580664	0.563308	0.999975	-0.0823562	1.08354	0.282241	0.999994	0.0382849	-0.500053	0.618587	0.99975	blue	salmon
PORCN	-0.345484	3.47476	0.000876346	0.0588271	-0.398022	3.87331	0.000236715	0.00454971	-0.385681	3.87914	0.000232087	0.00613093	-0.0575951	0.57906	0.564384	0.999975	-0.106654	1.06688	0.289647	0.999994	0.00549125	-0.0545318	0.956665	0.99975	blue	grey
AC078819.1	-0.339889	2.10038	0.0392536	0.303534	-0.439015	2.62493	0.010608	0.0566312	-0.385621	2.38304	0.019853	0.0933031	0.170808	-1.05514	0.294943	0.999975	-0.099487	0.611461	0.54285	0.999994	-0.112854	0.688588	0.49333	0.99975	blue	grey
BLVRB	-0.33546	2.45089	0.0167188	0.208776	-0.365764	2.5856	0.0117773	0.0606533	-0.385514	2.81665	0.00628113	0.0460825	0.197188	-1.44014	0.154228	0.999975	0.0477693	-0.347115	0.729533	0.999994	0.0795593	-0.573925	0.567835	0.99975	blue	turquoise
HSPA8P7	-0.414076	2.43685	0.0173281	0.211989	-0.526643	2.99877	0.00373684	0.028946	-0.385122	2.26651	0.0264731	0.112099	-0.287853	1.69341	0.0947679	0.999975	0.00797152	-0.0466586	0.962916	0.999994	0.0258257	-0.150066	0.881138	0.99975	blue	grey
ARPC3P1	-0.33436	2.32508	0.0229348	0.240319	-0.308465	2.07543	0.041576	0.13672	-0.384995	2.67726	0.00921594	0.0585907	0.0377799	-0.262619	0.793606	0.999975	0.140931	-0.974703	0.333022	0.999994	0.116589	-0.800503	0.426094	0.99975	blue	grey
CD24P4	-0.321938	1.69309	0.094829	0.432523	-0.323256	1.64487	0.104424	0.247234	-0.384623	2.02279	0.046867	0.16111	-0.0713349	0.375016	0.708768	0.999975	-0.0417453	0.218351	0.827783	0.999994	-0.121291	0.629821	0.530836	0.99975	blue	red
OLA1P1	-0.411898	2.88964	0.00511351	0.128277	-0.484112	3.28607	0.00158152	0.0164828	-0.383259	2.68879	0.00893247	0.0575985	-0.141217	0.990336	0.325378	0.999975	-0.129336	0.902436	0.369881	0.999994	-0.051748	0.35845	0.721072	0.99975	blue	magenta
MRPS26	-0.19217	2.72076	0.00818762	0.157108	-0.317262	4.3461	4.54196e-05	0.00135882	-0.381324	5.39895	8.45966e-07	0.000181326	-0.0642581	0.909439	0.3662	0.999975	-0.0609843	0.858745	0.393375	0.999994	0.0127134	-0.177724	0.859446	0.99975	blue	tan
FTH1P7	-0.396861	2.52016	0.0139834	0.196421	-0.218931	1.34516	0.18286	0.359291	-0.381254	2.42111	0.0180353	0.0880598	0.162088	-1.02892	0.307015	0.999975	0.108521	-0.685404	0.495324	0.999994	0.109887	-0.688996	0.493074	0.99975	blue	pink
RPL36	-0.255841	2.84073	0.00587122	0.138197	-0.232124	2.49378	0.0149735	0.071181	-0.38033	4.22311	7.04481e-05	0.00295589	0.0139815	-0.155187	0.877115	0.999975	-0.0849309	0.937925	0.351467	0.999994	0.0374602	-0.410688	0.68254	0.99975	blue	magenta
PPIAP22	-0.274567	3.16293	0.00229985	0.0926202	-0.310821	3.46441	0.000905657	0.0113765	-0.38019	4.37978	4.02322e-05	0.00219759	-0.0228103	0.262672	0.793565	0.999975	-0.028531	0.326888	0.744715	0.999994	0.0381421	-0.433838	0.665723	0.99975	blue	greenyellow
ZMAT5	-0.304408	3.15588	0.00234908	0.0931546	-0.34141	3.42467	0.001027	0.0122986	-0.379665	3.93619	0.000191163	0.00533272	-0.00130746	0.0135498	0.989227	0.999975	0.0489362	-0.504588	0.615413	0.999994	0.0760033	-0.777998	0.439159	0.99975	blue	grey
RPL27	-0.257753	3.0316	0.00339547	0.108074	-0.202262	2.30176	0.0242903	0.0969379	-0.378921	4.45684	3.04304e-05	0.00183373	-0.0236392	0.277935	0.781871	0.999975	-0.0572762	0.670014	0.505025	0.999994	0.0564377	-0.655419	0.514319	0.99975	blue	magenta
RPL10AP6	-0.248454	1.61308	0.11117	0.46003	-0.150588	0.945971	0.347377	0.544804	-0.378897	2.46004	0.0163319	0.0830974	0.125731	-0.816004	0.417231	0.999975	-0.00218874	0.0141334	0.988763	0.999994	-0.00184751	0.0118434	0.990584	0.99975	blue	magenta
FABP5P7	-0.251277	2.12974	0.0366654	0.297202	-0.264824	2.17175	0.0332213	0.118255	-0.378096	3.20471	0.00202747	0.0229622	0.143055	-1.21205	0.229517	0.999975	0.00886936	-0.0747669	0.940611	0.999994	0.0113663	-0.0951212	0.924487	0.99975	blue	blue
SCAND1	-0.346576	4.49658	2.63259e-05	0.00777754	-0.284765	3.57477	0.000635865	0.00897913	-0.375633	4.8737	6.46375e-06	0.000710719	-0.0532599	0.690758	0.491973	0.999975	0.00231307	-0.0298479	0.976272	0.999994	0.0926846	-1.18733	0.239059	0.99975	blue	grey
APRT	-0.255518	2.32624	0.0228692	0.240319	-0.252426	2.22355	0.0293668	0.109548	-0.375337	3.41717	0.00105157	0.0150645	0.0644986	-0.586983	0.55908	0.999975	0.100929	-0.913888	0.363873	0.999994	0.0832462	-0.748307	0.45675	0.99975	blue	black
RPL32	-0.309434	3.39804	0.00111677	0.0657559	-0.211541	2.24766	0.02771	0.105798	-0.375122	4.11949	0.000101458	0.00366309	-0.0339983	0.373215	0.710102	0.999975	-0.141614	1.5467	0.126387	0.999994	-0.0830993	0.901029	0.370623	0.99975	blue	magenta
HMGB1P10	-0.367536	2.59524	0.0114803	0.181495	-0.3789	2.58869	0.0116814	0.0602868	-0.374444	2.64409	0.0100777	0.0616631	-0.0598264	0.422291	0.67409	0.999975	0.00815937	-0.0573029	0.954465	0.999994	-0.0842808	0.587608	0.558662	0.99975	blue	turquoise
EEF1A1P13	-0.302725	1.80754	0.0749194	0.394129	-0.346577	2.00225	0.049084	0.152419	-0.374175	2.23422	0.0286233	0.117869	-0.0242336	0.144644	0.885402	0.999975	-0.0781581	0.464148	0.643964	0.999994	-0.12732	0.750617	0.455367	0.99975	blue	magenta
RPL15P3	-0.274113	2.52385	0.0138498	0.19603	-0.242567	2.16095	0.0340786	0.120194	-0.373684	3.44073	0.000976227	0.0143792	-0.0383898	0.35334	0.724882	0.999975	-0.111489	1.02096	0.310746	0.999994	-0.0802022	0.729127	0.468326	0.99975	blue	magenta
MTRNR2L2	-0.431463	2.71527	0.00831137	0.157576	-0.117214	0.71372	0.477743	0.664713	-0.37363	2.35138	0.0214876	0.097704	-0.229708	1.44507	0.152845	0.999975	-0.216758	1.35671	0.179179	0.999994	-0.047545	0.295431	0.768528	0.99975	blue	brown
GPX1	-0.273689	2.92596	0.00461047	0.122943	-0.264275	2.73366	0.00790358	0.0471569	-0.373568	3.99384	0.00015689	0.00476428	0.022015	-0.235273	0.814675	0.999975	0.055352	-0.588553	0.558032	0.999994	0.132322	-1.39677	0.166841	0.99975	blue	greenyellow
LAMTOR2	-0.225298	2.44625	0.0169182	0.209409	-0.29445	3.09338	0.00283053	0.0243217	-0.373219	4.05245	0.000128139	0.00423722	0.0056586	-0.0614176	0.951199	0.999975	-0.0429016	0.463295	0.644572	0.999994	0.0188126	-0.201685	0.84074	0.99975	blue	grey
VDAC1P1	-0.257394	2.02883	0.0462322	0.321895	-0.372709	2.84246	0.00584284	0.038617	-0.37225	2.93421	0.00450264	0.0373924	0.0918879	-0.724013	0.47144	0.999975	-0.0775772	0.608166	0.545021	0.999994	-0.0648619	0.504798	0.615266	0.99975	blue	grey
RPSAP19	-0.463431	2.50815	0.0144268	0.198726	-0.250362	1.31104	0.194076	0.373443	-0.372111	2.01396	0.0478092	0.163141	-0.0854034	0.462045	0.645464	0.999975	-0.0050211	0.0270277	0.978514	0.999994	-0.108384	0.579182	0.564302	0.99975	blue	grey
ALKBH7	-0.402184	5.19191	1.90405e-06	0.00142926	-0.281156	3.51178	0.000778713	0.0102535	-0.371345	4.79392	8.73652e-06	0.000857518	0.037743	-0.487057	0.627721	0.999975	-0.01669	0.214289	0.830937	0.999994	0.0418791	-0.533803	0.595148	0.99975	blue	magenta
ELOB	-0.27307	3.44469	0.000964081	0.0620714	-0.220081	2.68618	0.0089959	0.0511853	-0.36716	4.63171	1.60107e-05	0.00122674	-0.00502208	0.0633287	0.949683	0.999975	-0.0230745	0.289501	0.773043	0.999994	0.0606721	-0.755695	0.452336	0.99975	blue	tan
RPLP1	-0.33666	3.51062	0.000781615	0.0544654	-0.210061	2.11941	0.0375592	0.127655	-0.363697	3.79265	0.000310512	0.00734456	-0.0172059	0.179353	0.858172	0.999975	-0.147358	1.5283	0.130888	0.999994	-0.0479067	0.493253	0.623358	0.99975	blue	magenta
RPS16	-0.294447	3.02815	0.00343001	0.108125	-0.225737	2.2462	0.0278079	0.106004	-0.363066	3.73392	0.000377578	0.00812393	-0.00789513	0.0811652	0.935539	0.999975	-0.0911385	0.932207	0.354393	0.999994	0.0191454	-0.194408	0.846412	0.99975	blue	magenta
DRAP1	-0.255422	2.61688	0.0108383	0.176637	-0.208805	2.06988	0.0421079	0.137727	-0.362326	3.71225	0.000405664	0.00848037	0.0494495	-0.506443	0.614117	0.999975	0.0288682	-0.294163	0.769493	0.999994	0.0714965	-0.723258	0.471901	0.99975	blue	grey
STK19	-0.16314	1.92233	0.0585821	0.357431	-0.327044	3.72867	0.000384208	0.00644138	-0.36227	4.26887	5.98787e-05	0.0027038	0.0672415	-0.792042	0.430978	0.999975	-0.0203119	0.238047	0.812531	0.999994	0.0203164	-0.236373	0.813825	0.99975	blue	grey
POP7	-0.173212	2.52175	0.0139259	0.196049	-0.249058	3.50834	0.000787345	0.0102951	-0.361628	5.26497	1.43198e-06	0.000260728	-0.082128	1.19524	0.235975	0.999975	-0.0767091	1.11074	0.270433	0.999994	0.0807287	-1.16047	0.249751	0.99975	blue	pink
LSM7	-0.227202	2.26034	0.0268728	0.257374	-0.21056	2.02682	0.046443	0.146747	-0.360567	3.58722	0.000610765	0.0108408	-0.0233916	0.232629	0.81672	0.999975	-0.0320684	0.317307	0.751943	0.999994	0.0582527	-0.572214	0.568987	0.99975	blue	greenyellow
SNHG15	-0.147548	1.67657	0.0980314	0.438403	-0.227627	2.50259	0.0146364	0.0700108	-0.360508	4.0965	0.000109939	0.00387025	0.0091047	-0.103418	0.917923	0.999975	0.0914299	-1.03328	0.304985	0.999994	0.0363228	-0.407519	0.684855	0.99975	blue	grey
PSMC1P1	-0.18672	1.65048	0.103269	0.445404	-0.337902	2.88993	0.00510932	0.0354574	-0.360063	3.18279	0.00216637	0.0238065	0.0670149	-0.59215	0.555634	0.999975	0.175453	-1.54248	0.127408	0.999994	0.133787	-1.16766	0.246857	0.99975	blue	greenyellow
NTMT1	-0.238168	2.24585	0.0278317	0.261106	-0.214241	1.95468	0.0545642	0.16298	-0.359194	3.38717	0.00115547	0.015907	0.120817	-1.13885	0.2586	0.999975	0.111369	-1.04449	0.299807	0.999994	0.16216	-1.50981	0.135536	0.99975	blue	purple
CACYBPP2	-0.241113	2.04569	0.0444978	0.319001	-0.340617	2.79617	0.00665024	0.0420024	-0.358527	3.04195	0.00329405	0.0307643	0.0181309	-0.153773	0.878225	0.999975	-0.0823365	0.69479	0.489458	0.999994	0.0247923	-0.207691	0.836065	0.99975	blue	grey
TXN	-0.263568	2.76444	0.00726174	0.15069	-0.264616	2.68539	0.00901515	0.051226	-0.357985	3.75482	0.000352268	0.00783831	0.104198	-1.09249	0.278318	0.999975	-0.0277542	0.289523	0.773026	0.999994	0.0789145	-0.817244	0.416527	0.99975	blue	grey
DBI	-0.48823	4.82373	7.80811e-06	0.00367263	-0.446076	4.26428	6.08653e-05	0.00170352	-0.357366	3.53087	0.000732491	0.0119838	0.0201665	-0.199173	0.842698	0.999975	-0.0201291	0.197799	0.843768	0.999994	0.127033	-1.23924	0.219344	0.99975	blue	blue
UBE2V1P2	-0.208181	1.35182	0.180729	0.555406	0.0367222	-0.23072	0.818197	0.90092	-0.357023	2.31838	0.0233171	0.103224	-0.0372991	0.242113	0.809391	0.999975	0.238642	-1.54123	0.127713	0.999994	0.0508083	-0.325758	0.745567	0.99975	blue	grey
ST13P6	-0.190984	1.27513	0.206425	0.589381	-0.395536	2.55519	0.0127601	0.063963	-0.354207	2.36498	0.0207715	0.0958375	-0.0317372	0.211821	0.832855	0.999975	-0.0594512	0.394786	0.694186	0.999994	-0.06327	0.417098	0.677867	0.99975	blue	grey
USE1	-0.293937	3.01594	0.00355449	0.108757	-0.266609	2.6468	0.0100046	0.0547358	-0.352494	3.61686	0.000554702	0.0102653	0.0192336	-0.197274	0.844177	0.999975	-0.113461	1.15786	0.250807	0.999994	0.0760957	-0.770923	0.443314	0.99975	blue	magenta
RPL15P18	-0.198974	1.17378	0.244411	0.63189	-0.12608	0.719642	0.474111	0.662277	-0.352303	2.07835	0.041298	0.14885	0.00859867	-0.0507066	0.959702	0.999975	-0.140519	0.824458	0.412445	0.999994	-0.139057	0.809962	0.420672	0.99975	blue	magenta
TCEA1P2	-0.274515	1.80027	0.0760719	0.396207	-0.277781	1.76259	0.0822794	0.210455	-0.351615	2.30595	0.0240419	0.105494	0.00488259	-0.0320083	0.974555	0.999975	-0.0745391	0.48618	0.628339	0.999994	-0.0566144	0.366589	0.715017	0.99975	blue	magenta
PHPT1	-0.224785	2.87868	0.00527506	0.130398	-0.222516	2.75718	0.00740849	0.0452717	-0.351467	4.50113	2.58911e-05	0.001642	-0.00791213	0.101289	0.919607	0.999975	-0.0277269	0.353159	0.725017	0.999994	0.0693259	-0.876605	0.383662	0.99975	blue	greenyellow
PIH1D1	-0.281822	3.8823	0.000229612	0.0298964	-0.27545	3.67142	0.000464064	0.00718938	-0.351115	4.83698	7.42722e-06	0.000775206	0.0210322	-0.289627	0.772947	0.999975	0.0234452	-0.321225	0.748985	0.999994	0.0221195	-0.300864	0.764399	0.99975	blue	black
RPS11	-0.308109	3.36996	0.0012194	0.0679394	-0.18578	1.96605	0.053209	0.160268	-0.349175	3.81921	0.000284063	0.00695092	-0.0229034	0.250416	0.80299	0.999975	-0.118283	1.28671	0.20238	0.999994	0.00389516	-0.0420656	0.966565	0.99975	blue	magenta
RNPS1P1	-0.256187	1.69477	0.0945071	0.431927	-0.122437	0.783693	0.435831	0.629342	-0.349113	2.30957	0.0238286	0.104748	-0.0802418	0.530636	0.597329	0.999975	-0.14315	0.941864	0.349461	0.999994	0.116705	-0.762299	0.44841	0.99975	blue	grey
EBP	-0.651675	5.82122	1.56365e-07	0.000264772	-0.719793	6.22112	3.05252e-08	4.27176e-06	-0.346004	3.09083	0.00285198	0.028067	-0.0115859	0.103456	0.917893	0.999975	0.0677677	-0.60207	0.549048	0.999994	0.282889	-2.49505	0.0149245	0.99975	blue	greenyellow
ATP5MF	-0.244691	2.58349	0.0118434	0.182453	-0.21131	2.15867	0.0342623	0.12056	-0.345956	3.65276	0.000493353	0.00949312	-0.0289377	0.305417	0.760943	0.999975	-0.075653	0.794432	0.429595	0.999994	0.0859178	-0.895681	0.373454	0.99975	blue	tan
GRHPR	-0.241503	2.67352	0.00930961	0.164551	-0.250762	2.68597	0.00900109	0.0511977	-0.345805	3.82828	0.000275545	0.00680146	0.0407479	-0.450928	0.653417	0.999975	0.0803463	-0.884644	0.379339	0.999994	0.114898	-1.2559	0.213275	0.99975	blue	brown
TBCB	-0.319378	3.92864	0.000196154	0.0284031	-0.290053	3.45216	0.000941538	0.0116543	-0.345751	4.25315	6.33223e-05	0.00279957	-0.00592337	0.0728361	0.942142	0.999975	0.0584771	-0.715425	0.476696	0.999994	0.100582	-1.22162	0.225897	0.99975	blue	grey
RPL8	-0.261272	3.39764	0.00111817	0.0657559	-0.193527	2.43502	0.017409	0.0780891	-0.343741	4.47019	2.89871e-05	0.00176561	0.00411407	-0.0534807	0.957499	0.999975	-0.0414252	0.535785	0.593784	0.999994	0.030005	-0.385264	0.701195	0.99975	blue	magenta
CETN2	-0.409999	4.62296	1.65385e-05	0.00533356	-0.458169	4.99851	4.01732e-06	0.000216641	-0.342947	3.867	0.00024182	0.0062996	-0.0111394	0.125556	0.900438	0.999975	-0.0835079	0.936497	0.352196	0.999994	-0.0304318	0.338802	0.73576	0.99975	blue	green
RPS5	-0.299731	3.27189	0.00165194	0.079693	-0.242126	2.55733	0.0126885	0.0636607	-0.34245	3.73831	0.000372126	0.00805491	-0.0113177	0.1235	0.902061	0.999975	-0.0498446	0.541162	0.590093	0.999994	-0.000219979	0.00237099	0.998115	0.99975	blue	magenta
MRPL52	-0.245796	2.96512	0.00411954	0.117041	-0.216189	2.52336	0.0138677	0.0674228	-0.341575	4.12063	0.000101053	0.00366309	0.028397	-0.342437	0.733035	0.999975	0.0360263	-0.432244	0.666876	0.999994	0.102092	-1.21602	0.228012	0.99975	blue	grey
AC116533.1	-0.2896	2.17195	0.0332059	0.285419	-0.201379	1.46131	0.148349	0.313215	-0.340034	2.55026	0.0129263	0.0715767	-0.0113924	0.0854099	0.932176	0.999975	-0.150834	1.1251	0.264341	0.999994	-0.0305357	0.226121	0.821758	0.99975	blue	magenta
EDF1	-0.198264	2.29819	0.0245038	0.247419	-0.149726	1.67926	0.0975041	0.235526	-0.339757	3.93842	0.000189713	0.00530102	-0.0218764	0.25349	0.800623	0.999975	-0.019833	0.22865	0.819799	0.999994	0.0460855	-0.527458	0.599522	0.99975	blue	greenyellow
RPS14	-0.284885	3.6685	0.00046854	0.042201	-0.222216	2.76868	0.00717716	0.0443058	-0.339244	4.36859	4.18884e-05	0.00224567	0.00322373	-0.0414972	0.967016	0.999975	-0.0449187	0.57529	0.566916	0.999994	0.0108484	-0.137932	0.890685	0.99975	blue	magenta
UBE2D3P1	-0.487913	3.47127	0.00088614	0.0588432	-0.428594	2.95032	0.00429906	0.0318722	-0.339074	2.41241	0.0184373	0.0893201	0.061246	-0.435577	0.664467	0.999975	0.0126954	-0.0898324	0.928674	0.999994	0.118863	-0.834978	0.406535	0.99975	blue	magenta
AC004057.1	-0.178775	1.30276	0.196871	0.576949	-0.0499037	0.35186	0.725987	0.845936	-0.339055	2.47081	0.0158866	0.08179	-0.102485	0.746551	0.457803	0.999975	-0.0588457	0.426497	0.671038	0.999994	0.109874	-0.790565	0.431834	0.99975	blue	grey
CYP51A1P2	-0.489261	2.98178	0.00392573	0.114217	-0.762105	4.49394	2.65805e-05	0.00090927	-0.339015	2.06616	0.0424683	0.151699	-0.153044	0.932378	0.354305	0.999975	-0.125914	0.763222	0.447863	0.999994	0.0738474	-0.444377	0.658124	0.99975	blue	grey
MRPL20	-0.24418	3.20843	0.00200472	0.0877684	-0.260466	3.3114	0.00146273	0.0156859	-0.338972	4.45407	3.07394e-05	0.00184578	-0.050653	0.665317	0.508007	0.999975	0.000609385	-0.00796372	0.993668	0.999994	0.0363218	-0.471228	0.638925	0.99975	blue	tan
RPS18	-0.294154	3.45967	0.00091937	0.0601069	-0.224473	2.55447	0.0127842	0.0639891	-0.338862	3.98559	0.000161404	0.0048117	-0.00839336	0.0986817	0.921669	0.999975	-0.113893	1.33229	0.187031	0.999994	-0.0487206	0.565788	0.573324	0.99975	blue	magenta
RAMACL	-0.293379	2.21405	0.0300429	0.27224	-0.291695	2.12992	0.0366501	0.125981	-0.337931	2.55033	0.0129239	0.0715767	-0.0661813	0.499269	0.619136	0.999975	0.105924	-0.795048	0.429239	0.999994	0.052131	-0.38845	0.698847	0.99975	blue	grey
RPL26L1	-0.250456	3.23012	0.00187687	0.0854328	-0.358443	4.47286	2.87057e-05	0.000962642	-0.337733	4.35584	4.38566e-05	0.00229924	-0.0688082	0.887095	0.378027	0.999975	-0.0633225	0.812247	0.419369	0.999994	0.0236895	-0.301665	0.76379	0.99975	blue	greenyellow
RPS19BP1	-0.181056	2.18145	0.0324673	0.28319	-0.235521	2.74561	0.00764831	0.046023	-0.336926	4.05955	0.000125022	0.00418566	-0.0554247	0.66754	0.506595	0.999975	-0.0159765	0.19145	0.84872	0.999994	0.130917	-1.55744	0.12382	0.99975	blue	greenyellow
RPS9	-0.288627	3.4645	0.000905394	0.0596538	-0.219877	2.55364	0.012812	0.0640523	-0.336834	4.04325	0.00013229	0.00430761	0.0378006	-0.453569	0.651524	0.999975	-0.0273484	0.326495	0.745012	0.999994	0.0533504	-0.632299	0.529225	0.99975	blue	magenta
GADD45GIP1	-0.32916	3.7214	0.000393567	0.039804	-0.208148	2.27693	0.0258104	0.101122	-0.336426	3.80365	0.000299289	0.00717304	0.0722934	-0.817034	0.416646	0.999975	0.0764237	-0.859349	0.393044	0.999994	0.09878	-1.10268	0.273894	0.99975	blue	greenyellow
ADCK5	-0.345589	3.1035	0.00274679	0.0989785	-0.369044	3.20662	0.00201577	0.0193443	-0.335247	3.01069	0.00360933	0.0325609	-0.130465	1.17119	0.245444	0.999975	-0.165227	1.47575	0.144437	0.999994	-0.173618	1.53946	0.128144	0.99975	blue	blue
RPS24	-0.271306	3.41925	0.00104472	0.063995	-0.23547	2.87135	0.00538573	0.0367284	-0.33502	4.22233	7.06414e-05	0.00295589	0.0029177	-0.0367582	0.970781	0.999975	-0.0579903	0.72689	0.469687	0.999994	0.0312363	-0.388698	0.698665	0.99975	blue	magenta
RPL6P27	-0.201696	1.88048	0.0641505	0.370806	-0.0927445	0.836636	0.405608	0.601781	-0.333048	3.10519	0.00273305	0.0274759	-0.208847	1.94643	0.0555661	0.999975	-0.0300457	0.278609	0.781356	0.999994	-0.0270063	0.248609	0.804382	0.99975	blue	grey
AC104563.1	-0.287249	2.2667	0.026461	0.255937	-0.248778	1.89944	0.0615751	0.175227	-0.332767	2.62595	0.0105791	0.0635685	0.0292632	-0.230834	0.818109	0.999975	-0.132242	1.03788	0.302854	0.999994	-0.0552922	0.430806	0.667917	0.99975	blue	magenta
CCDC167	-0.206241	2.13931	0.0358551	0.295872	-0.244229	2.45117	0.0167067	0.076129	-0.332643	3.45055	0.00094636	0.0141802	0.010334	-0.107154	0.914969	0.999975	-0.0947386	0.977389	0.3317	0.999994	-0.0431826	0.442271	0.659639	0.99975	blue	grey
EEF1B2P6	-0.210444	1.48735	0.141357	0.5041	-0.195593	1.33754	0.185321	0.36211	-0.331505	2.34302	0.0219385	0.0990719	-0.21681	1.53178	0.130028	0.999975	-0.158685	1.11546	0.268421	0.999994	-0.0227779	0.158953	0.874157	0.99975	blue	greenyellow
TXNDC17	-0.21181	2.42017	0.0180784	0.215799	-0.262949	2.90702	0.00486673	0.0344228	-0.331283	3.78538	0.000318148	0.00743062	-0.00332723	0.0380035	0.969792	0.999975	0.0384596	-0.437064	0.663393	0.999994	0.126772	-1.43023	0.157044	0.99975	blue	greenyellow
MAGED4	-0.294317	2.12951	0.0366853	0.297221	-0.271378	1.89984	0.0615222	0.175203	-0.331103	2.39573	0.01923	0.0917242	-0.0325608	0.235505	0.814496	0.999975	0.130308	-0.937725	0.35157	0.999994	0.0341475	-0.243952	0.807972	0.99975	blue	red
RPL18AP3	-0.262784	2.3416	0.0220162	0.236546	-0.166585	1.43624	0.155332	0.322848	-0.33045	2.94462	0.00437005	0.0366327	0.0644665	-0.574234	0.567627	0.999975	-0.125849	1.11533	0.268474	0.999994	-0.0981537	0.863578	0.390732	0.99975	blue	magenta
SSR4	-0.32955	3.92434	0.00019905	0.0284031	-0.205653	2.36951	0.0205377	0.0870283	-0.330168	3.93179	0.000194054	0.00538676	0.0326133	-0.388223	0.699014	0.999975	0.00865055	-0.102454	0.918685	0.999994	0.091755	-1.07884	0.284317	0.99975	blue	greenyellow
EXOSC4	-0.201885	2.40739	0.0186723	0.219721	-0.229485	2.64773	0.00997964	0.0547217	-0.329726	3.93193	0.000193962	0.00538676	-0.00834429	0.0994657	0.921049	0.999975	0.117123	-1.38908	0.169158	0.999994	0.145682	-1.71526	0.0906657	0.99975	blue	grey
SIVA1	-0.160672	1.68014	0.0973325	0.437286	-0.247717	2.50633	0.0144952	0.0696305	-0.329153	3.44202	0.000972245	0.0143613	-0.031972	0.334208	0.739209	0.999975	-0.0208196	0.21653	0.829197	0.999994	0.0251211	-0.259373	0.796099	0.99975	blue	turquoise
FAU	-0.326284	3.42553	0.00102423	0.063995	-0.213895	2.17275	0.0331432	0.11812	-0.329086	3.45503	0.000933015	0.0140683	-0.0119549	0.125464	0.900512	0.999975	-0.0257915	0.269309	0.788474	0.999994	0.0802917	-0.832308	0.40803	0.99975	blue	magenta
NDUFB2	-0.233944	2.82385	0.00615589	0.140089	-0.205074	2.39507	0.0192618	0.083289	-0.328352	3.96351	0.000174109	0.00503964	-0.0591691	0.713947	0.477604	0.999975	-0.0300898	0.361235	0.718998	0.999994	0.080406	-0.958295	0.341171	0.99975	blue	tan
RPL27A	-0.248794	3.50098	0.00080609	0.0552612	-0.1794	2.44259	0.0170768	0.0772953	-0.328211	4.61864	1.6805e-05	0.00124036	0.0344363	-0.484404	0.629593	0.999975	-0.0797493	1.11614	0.268132	0.999994	-0.0153744	0.213613	0.831462	0.99975	blue	magenta
PPP1CA	-0.288329	3.44678	0.000957719	0.0618972	-0.278805	3.2248	0.00190749	0.0186868	-0.327836	3.91915	0.000202601	0.00553328	0.026548	-0.317247	0.751988	0.999975	0.14538	-1.72851	0.0882499	0.999994	0.146442	-1.72851	0.0882492	0.99975	blue	greenyellow
AC034236.1	-0.237004	2.15536	0.0345302	0.291089	-0.215491	1.89614	0.0620165	0.176166	-0.327529	2.97868	0.00396109	0.0344849	0.0875825	-0.796202	0.428573	0.999975	-0.0414096	0.374548	0.709115	0.999994	0.121779	-1.0935	0.277877	0.99975	blue	magenta
AIP	-0.213733	2.71136	0.0084006	0.157576	-0.283695	3.48213	0.000856047	0.0109235	-0.327491	4.15455	8.97234e-05	0.00346869	0.0324102	-0.410996	0.682315	0.999975	0.00104645	-0.013203	0.989503	0.999994	0.0476891	-0.597331	0.552189	0.99975	blue	tan
RPL4P4	-0.304128	2.52901	0.0136648	0.194636	-0.124362	1.0006	0.320423	0.517226	-0.327291	2.72169	0.00816692	0.0540408	0.0537671	-0.446942	0.656279	0.999975	0.00545062	-0.0450798	0.96417	0.999994	0.0704909	-0.578773	0.564576	0.99975	blue	grey
NXT1	-0.186362	2.27154	0.0261518	0.253964	-0.330063	3.89258	0.000221748	0.00434088	-0.326581	3.98075	0.000164112	0.00486496	0.0433612	-0.52833	0.59892	0.999975	0.02388	-0.289494	0.773048	0.999994	0.0913193	-1.09902	0.275476	0.99975	blue	greenyellow
EIF3FP3	-0.199747	1.33885	0.184897	0.561786	-0.181541	1.17735	0.242994	0.433482	-0.326523	2.18865	0.0319179	0.125983	0.0960569	-0.643608	0.521906	0.999975	-0.102204	0.681339	0.497877	0.999994	-0.0881681	0.583505	0.561405	0.99975	blue	grey
MAP1LC3B2	-0.138794	1.20057	0.233912	0.620238	-0.167866	1.40494	0.164405	0.334841	-0.326081	2.82068	0.0062108	0.0458047	0.0494841	-0.427883	0.670033	0.999975	-0.0580733	0.499615	0.618893	0.999994	0.0606377	-0.517895	0.606144	0.99975	blue	grey
DCTN3	-0.216815	3.46749	0.000896849	0.0593217	-0.235584	3.64544	0.000505312	0.00765336	-0.325425	5.20459	1.81239e-06	0.000303854	-0.07497	1.19855	0.234696	0.999975	-0.0551104	0.876598	0.383665	0.999994	0.0283029	-0.446929	0.656289	0.99975	blue	grey
UBB	-0.232954	2.91029	0.00482158	0.125413	-0.254432	3.0755	0.00298428	0.0251909	-0.324732	4.05697	0.000126143	0.00419641	-0.0354223	0.442368	0.659569	0.999975	-0.008338	0.103602	0.917777	0.999994	0.0912975	-1.12618	0.263889	0.99975	blue	grey
HSD17B10	-0.160397	1.85203	0.0681852	0.379422	-0.241661	2.69983	0.00866846	0.0498753	-0.324609	3.7482	0.000360105	0.00790877	0.0135549	-0.156455	0.876119	0.999975	0.0729269	-0.837493	0.40513	0.999994	0.154178	-1.75774	0.0831076	0.99975	blue	black
RPL34	-0.233803	3.11803	0.00263062	0.0973744	-0.181742	2.34511	0.0218249	0.0903702	-0.322161	4.29649	5.42583e-05	0.0025521	-0.020182	0.269052	0.788671	0.999975	-0.112598	1.49349	0.139747	0.999994	0.00212333	-0.0279595	0.977773	0.99975	blue	magenta
UROD	-0.262255	2.92919	0.0045679	0.122386	-0.337171	3.64379	0.000508042	0.0076741	-0.322143	3.59819	0.000589412	0.0106176	0.0117516	-0.131209	0.895982	0.999975	0.0374808	-0.416367	0.678399	0.999994	0.0732892	-0.808252	0.421649	0.99975	blue	black
PEBP1P2	-0.202497	1.43485	0.155727	0.521441	-0.213513	1.46383	0.147661	0.311996	-0.320775	2.273	0.0260589	0.11106	-0.0561219	0.397522	0.692177	0.999975	-0.0778578	0.548695	0.584938	0.999994	0.0631548	-0.441851	0.659942	0.99975	blue	grey
NDUFS3	-0.234095	2.67991	0.00914995	0.163091	-0.22469	2.4888	0.0151676	0.0717208	-0.320621	3.67055	0.000465386	0.00924303	-0.0659584	0.754813	0.452861	0.999975	-0.0353983	0.403044	0.688129	0.999994	0.074327	-0.840149	0.403649	0.99975	blue	black
RPS15	-0.24926	3.08833	0.00287314	0.101145	-0.179671	2.15391	0.0346481	0.12162	-0.320498	3.97107	0.000169656	0.00495308	0.0306169	-0.379204	0.705669	0.999975	0.00953626	-0.117514	0.906785	0.999994	0.0930072	-1.13781	0.259031	0.99975	blue	greenyellow
C16orf91	-0.191029	2.50406	0.0145806	0.199189	-0.301419	3.8229	0.000280564	0.0051249	-0.319993	4.19466	7.79052e-05	0.00315348	-0.0997752	1.3074	0.1953	0.999975	-0.012097	0.157712	0.875132	0.999994	0.0230759	-0.298667	0.766068	0.99975	blue	grey
TIMM13	-0.202506	3.02379	0.00347401	0.108125	-0.16327	2.35884	0.021092	0.0885134	-0.319992	4.77819	9.26865e-06	0.000876794	0.0115973	-0.173106	0.863061	0.999975	0.0110197	-0.163654	0.870469	0.999994	0.0794658	-1.17159	0.245284	0.99975	blue	greenyellow
B3GNTL1	-0.383551	2.67951	0.00915998	0.163098	-0.248044	1.67663	0.0980185	0.236431	-0.319659	2.23321	0.0286929	0.118012	-0.09155	0.639339	0.524663	0.999975	-0.0639809	0.444553	0.657997	0.999994	-0.0433483	0.29901	0.765808	0.99975	blue	black
MLX	-0.177315	2.23728	0.028413	0.264786	-0.328821	4.01432	0.000146201	0.00321322	-0.319446	4.03072	0.000138148	0.00436633	0.0603774	-0.761538	0.448862	0.999975	0.0477596	-0.599346	0.550853	0.999994	0.076858	-0.957516	0.341561	0.99975	blue	pink
SNRPD2	-0.150577	1.8429	0.0695237	0.382844	-0.241912	2.8647	0.00548781	0.0371998	-0.31812	3.89356	0.000221016	0.00592163	-0.0150528	0.184163	0.854411	0.999975	0.011808	-0.143735	0.886117	0.999994	0.0508193	-0.614122	0.5411	0.99975	blue	greenyellow
LSM10	-0.105816	1.44548	0.15273	0.518271	-0.267275	3.53262	0.000728399	0.00976562	-0.318096	4.34539	4.55361e-05	0.00231551	0.0241694	-0.330041	0.742342	0.999975	-0.00950681	0.129163	0.897595	0.999994	0.121977	-1.6452	0.104355	0.99975	blue	greenyellow
PSMB3	-0.227936	3.02903	0.0034212	0.108125	-0.234276	3.01228	0.00359265	0.028099	-0.318054	4.2267	6.95569e-05	0.00295561	0.0649979	-0.863436	0.390809	0.999975	0.0583689	-0.771459	0.442999	0.999994	0.144476	-1.89568	0.0620781	0.99975	blue	greenyellow
PRDX5	-0.354194	4.62043	1.66939e-05	0.00533356	-0.323007	4.07691	0.000117703	0.00279142	-0.317324	4.13956	9.45709e-05	0.00353503	-0.00378479	0.0493543	0.960776	0.999975	0.00257027	-0.0333473	0.973491	0.999994	0.154038	-1.98405	0.051123	0.99975	blue	tan
SNRNP25	-0.246276	2.44529	0.0169594	0.209409	-0.31384	3.01505	0.00356374	0.0279503	-0.317276	3.15034	0.00238845	0.0251515	-0.11062	1.09796	0.275939	0.999975	-0.00258032	0.0254815	0.979743	0.999994	0.101292	-0.993037	0.324069	0.99975	blue	greenyellow
MPV17L2	-0.369411	3.70594	0.000414208	0.039851	-0.326408	3.1683	0.00226302	0.0208853	-0.316755	3.17778	0.00219937	0.0240581	0.100043	-1.00327	0.319142	0.999975	0.215564	-2.15083	0.0348998	0.999994	0.326149	-3.23062	0.00187403	0.99975	blue	greenyellow
ECHS1	-0.173858	2.46017	0.0163264	0.207127	-0.21855	2.99227	0.00380811	0.0293236	-0.316193	4.47439	2.85461e-05	0.00175419	0.00582919	-0.0824558	0.934517	0.999975	0.000210144	-0.00295754	0.997649	0.999994	0.0205176	-0.286669	0.775202	0.99975	blue	black
RPS28	-0.280768	2.54414	0.0131351	0.19108	-0.16082	1.40998	0.162919	0.332775	-0.315231	2.8565	0.0056164	0.0428776	-0.0467542	0.423503	0.673211	0.999975	-0.191585	1.72662	0.0885909	0.999994	-0.0549431	0.491574	0.624539	0.99975	blue	magenta
RPL7A	-0.201675	2.26177	0.0267799	0.257257	-0.139672	1.51559	0.134069	0.292588	-0.314862	3.53124	0.000731632	0.0119838	0.00630028	-0.0706313	0.94389	0.999975	-0.0523182	0.583567	0.561364	0.999994	-0.0062263	0.0689457	0.945227	0.99975	blue	magenta
MRPL27	-0.2147	2.74285	0.00770657	0.152759	-0.310437	3.83726	0.000267343	0.00496847	-0.314846	4.02234	0.000142209	0.00445929	-0.0992499	1.26748	0.20913	0.999975	0.0300883	-0.382305	0.703379	0.999994	0.136356	-1.71999	0.0897965	0.99975	blue	tan
TMEM101	-0.221352	2.91069	0.00481609	0.125413	-0.368977	4.6945	1.26782e-05	0.000540757	-0.314798	4.13956	9.4569e-05	0.00353503	0.00849033	-0.111604	0.911453	0.999975	0.0263291	-0.344342	0.731608	0.999994	0.0447461	-0.580964	0.563107	0.99975	blue	black
NOSIP	-0.300685	3.67248	0.000462454	0.0421389	-0.2333	2.75702	0.0074119	0.0452762	-0.313941	3.83448	0.000269854	0.00671556	-0.0554361	0.676833	0.500714	0.999975	0.0355232	-0.43152	0.667399	0.999994	0.119229	-1.43784	0.154878	0.99975	blue	grey
RPL37A	-0.237722	2.72887	0.00800805	0.156044	-0.105823	1.17536	0.243783	0.434478	-0.31375	3.60169	0.000582753	0.0105877	-0.0337387	0.387152	0.699803	0.999975	-0.159167	1.81722	0.0734093	0.999994	-0.0273568	0.310069	0.757418	0.99975	blue	magenta
TRAPPC2L	-0.229193	2.94896	0.00431589	0.119805	-0.265646	3.30711	0.0014822	0.0158049	-0.313387	4.03236	0.00013737	0.00436633	-0.0163431	0.210205	0.83411	0.999975	-0.05689	0.728024	0.468997	0.999994	0.0397113	-0.504502	0.615473	0.99975	blue	greenyellow
PIN1	-0.26144	3.73687	0.000373904	0.0384248	-0.247276	3.41976	0.00104301	0.0124551	-0.313279	4.47793	2.81802e-05	0.00175419	-0.0191223	0.273224	0.785476	0.999975	0.0329675	-0.468666	0.640746	0.999994	0.111646	-1.57566	0.119557	0.99975	blue	greenyellow
COA3	-0.217803	2.92056	0.00468219	0.12383	-0.23398	3.03571	0.00335488	0.0271084	-0.312877	4.19554	7.76618e-05	0.00315348	-0.0567543	0.760753	0.449328	0.999975	-0.0747055	0.996317	0.322484	0.999994	0.0657818	-0.870944	0.386724	0.99975	blue	grey
COX4I1	-0.219373	3.05251	0.00319348	0.105538	-0.206147	2.77542	0.0070444	0.0437094	-0.312462	4.34792	4.51243e-05	0.00230276	-0.0614738	0.855076	0.395389	0.999975	-0.0444397	0.615016	0.540513	0.999994	0.0584778	-0.803426	0.424414	0.99975	blue	tan
RPAIN	-0.15084	2.47263	0.0158127	0.206097	-0.183566	2.91147	0.00480542	0.0341518	-0.311235	5.102	2.69793e-06	0.000413035	0.0118328	-0.193896	0.846811	0.999975	-0.0433656	0.707015	0.481875	0.999994	0.0662275	-1.07192	0.287392	0.99975	blue	grey
LIN7B	-0.22787	1.75795	0.083073	0.409751	-0.188834	1.40953	0.16305	0.33296	-0.311197	2.40084	0.0189838	0.0910629	-0.0650712	0.50182	0.617349	0.999975	-0.227535	1.74585	0.0851691	0.999994	-0.0568191	0.432806	0.66647	0.99975	blue	blue
COMMD5	-0.221136	2.93499	0.00449266	0.12143	-0.337933	4.33966	4.64832e-05	0.00138088	-0.311085	4.12892	9.81617e-05	0.00361342	-0.0677909	0.899414	0.371477	0.999975	0.0443554	-0.585511	0.560063	0.999994	0.123173	-1.61415	0.110937	0.99975	blue	tan
RPL30	-0.240167	3.28035	0.0016096	0.0785474	-0.229716	3.03582	0.00335383	0.0271084	-0.31073	4.24424	6.53596e-05	0.00284507	-0.0357391	0.487969	0.627078	0.999975	-0.0869352	1.18099	0.241555	0.999994	-0.00591357	0.0797513	0.93666	0.99975	blue	magenta
ATP6V0B	-0.26761	3.62452	0.000541022	0.044738	-0.280302	3.67326	0.000461263	0.00717224	-0.309771	4.19565	7.76314e-05	0.00315348	-0.0181675	0.245971	0.806415	0.999975	-0.0301626	0.406312	0.685737	0.999994	0.0779441	-1.04235	0.300791	0.99975	blue	grey
RPS12	-0.227862	2.54718	0.0130311	0.190582	-0.196865	2.12928	0.0367056	0.126021	-0.308472	3.44836	0.000952938	0.0142168	-0.0385049	0.430272	0.668303	0.999975	-0.18878	2.09886	0.0393916	0.999994	-0.0769396	0.849216	0.39862	0.99975	blue	magenta
AL359918.1	-0.310374	2.05274	0.0437901	0.31715	-0.298986	1.91327	0.0597519	0.172335	-0.307725	2.03527	0.0455636	0.158272	0.0442388	-0.292477	0.770776	0.999975	0.167534	-1.10203	0.274177	0.999994	-0.0364228	0.237849	0.812684	0.99975	blue	grey
ERG28	-0.52226	6.18361	3.56225e-08	8.61709e-05	-0.484886	5.55485	4.55822e-07	3.99919e-05	-0.307679	3.64305	0.000509275	0.00968939	-0.0229299	0.271393	0.786877	0.999975	0.0160337	-0.188812	0.85078	0.999994	0.175346	-2.0499	0.0440737	0.99975	blue	greenyellow
SPCS2P4	-0.252253	2.41137	0.0184859	0.218549	-0.205378	1.89958	0.0615566	0.175227	-0.306876	2.93359	0.00451069	0.037441	0.0220656	-0.210855	0.833605	0.999975	0.0124307	-0.118185	0.906255	0.999994	0.00234465	-0.0221302	0.982406	0.99975	blue	grey
COX6B1	-0.214395	2.16653	0.0336334	0.286629	-0.169546	1.65773	0.10179	0.242694	-0.306876	3.10115	0.00276599	0.0275951	-0.0723023	0.730371	0.46757	0.999975	-0.0525243	0.5279	0.599217	0.999994	0.0621516	-0.620131	0.537159	0.99975	blue	tan
SDHAF2	-0.10126	1.03012	0.306454	0.689875	-0.286704	2.82205	0.0061871	0.0400176	-0.30596	3.11263	0.00267319	0.0270467	-0.114538	1.16477	0.248015	0.999975	-0.00805895	0.0815403	0.935242	0.999994	0.0798182	-0.801744	0.42538	0.99975	blue	grey
VPS28	-0.235247	2.25256	0.0273838	0.259486	-0.154901	1.43511	0.155654	0.323199	-0.305128	2.92177	0.00466599	0.0381726	-0.0322293	0.308493	0.758612	0.999975	-0.0341675	0.325393	0.745842	0.999994	0.0525673	-0.496993	0.620731	0.99975	blue	magenta
RPLP0	-0.311606	3.98466	0.00016192	0.0248867	-0.244271	3.02229	0.00348928	0.0277129	-0.304866	3.89857	0.000217287	0.00583095	-0.00813223	0.103953	0.9175	0.999975	-0.0857553	1.09066	0.279117	0.999994	-0.0523617	0.66112	0.510678	0.99975	blue	magenta
PCGF1	-0.256622	2.89628	0.00501799	0.12698	-0.20051	2.18957	0.031848	0.115135	-0.304324	3.43473	0.000994906	0.0144981	0.085008	-0.959062	0.340787	0.999975	-0.0506511	0.56856	0.571451	0.999994	-0.0740834	0.825558	0.411824	0.99975	blue	grey
MRPL14	-0.197907	2.32103	0.0231653	0.241539	-0.262751	2.98156	0.00392824	0.0299896	-0.304197	3.56768	0.000650614	0.0112353	0.00364125	-0.0426886	0.96607	0.999975	0.0635285	-0.741022	0.461128	0.999994	0.120452	-1.39481	0.167428	0.99975	blue	tan
DGCR6L	-0.297569	3.32834	0.00138798	0.0731773	-0.287332	3.10958	0.00269757	0.0235697	-0.303884	3.39906	0.00111319	0.0155746	-0.0212337	0.237414	0.813021	0.999975	0.0271273	-0.301778	0.763705	0.999994	0.0725269	-0.800977	0.425821	0.99975	blue	greenyellow
NDUFS5	-0.206741	2.30914	0.0238536	0.24353	-0.182434	1.97155	0.0525643	0.158966	-0.30366	3.39174	0.00113906	0.0157579	0.00896646	-0.100112	0.920538	0.999975	-0.0163038	0.181115	0.856794	0.999994	0.108069	-1.19181	0.237311	0.99975	blue	greenyellow
RPLP2	-0.32545	3.39297	0.00113465	0.0660241	-0.158235	1.59616	0.114901	0.263669	-0.303471	3.16391	0.00229312	0.0244517	0.00134403	-0.014007	0.988864	0.999975	-0.0991118	1.02769	0.307588	0.999994	-0.0288436	0.296912	0.767402	0.99975	blue	magenta
RPL18	-0.230774	3.08168	0.00293028	0.101701	-0.137859	1.7812	0.0791624	0.205466	-0.303449	4.05226	0.000128223	0.00423722	0.0108195	-0.144427	0.885573	0.999975	-0.0426318	0.566208	0.573041	0.999994	0.0253378	-0.33408	0.739306	0.99975	blue	magenta
RPL38	-0.230071	2.78484	0.00686298	0.148607	-0.181853	2.12979	0.0366618	0.125981	-0.301551	3.65014	0.000497602	0.00956402	-0.00864934	0.104656	0.916945	0.999975	-0.0536459	0.645827	0.520476	0.999994	0.0637238	-0.761589	0.448831	0.99975	blue	magenta
POLR2F	-0.232758	3.29285	0.00154885	0.0772741	-0.298858	4.09082	0.000112136	0.00268192	-0.301445	4.26469	6.07765e-05	0.00272256	-0.0815752	1.15363	0.252525	0.999975	0.00848978	-0.119455	0.905252	0.999994	0.0548796	-0.766584	0.445874	0.99975	blue	greenyellow
FOXRED1	-0.107313	1.32546	0.189272	0.568289	-0.239943	2.86749	0.00544471	0.0369965	-0.300569	3.71256	0.000405251	0.00848037	-0.01939	0.239407	0.811481	0.999975	0.0859636	-1.05602	0.294542	0.999994	0.0190777	-0.232662	0.816694	0.99975	blue	grey
GPX4	-0.255175	3.0573	0.00314878	0.105538	-0.160006	1.85487	0.0677725	0.186409	-0.300458	3.59994	0.000586079	0.0106045	0.0442443	-0.529905	0.597833	0.999975	-0.0256115	0.305194	0.761112	0.999994	0.0442777	-0.523801	0.602051	0.99975	blue	tan
MPG	-0.177825	2.51275	0.0142557	0.198057	-0.251699	3.44124	0.000974659	0.011899	-0.30003	4.23966	6.64316e-05	0.00288432	-0.0108189	0.152821	0.878974	0.999975	0.0706817	-0.993353	0.323916	0.999994	0.0643872	-0.898331	0.37205	0.99975	blue	greenyellow
HNRNPKP4	-0.173417	1.47723	0.144041	0.50939	-0.279168	2.30091	0.0243408	0.0970354	-0.299485	2.55119	0.0128946	0.0714478	0.0134135	-0.11422	0.909386	0.999975	0.020688	-0.175274	0.861364	0.999994	-0.0450027	0.37851	0.706183	0.99975	blue	magenta
EMC9	-0.136003	1.45732	0.149445	0.51482	-0.260672	2.70257	0.00860407	0.0497032	-0.299365	3.20787	0.00200814	0.0228565	0.0179352	-0.192112	0.848204	0.999975	0.00695069	-0.0740755	0.941159	0.999994	0.0738437	-0.781269	0.437245	0.99975	blue	greenyellow
EIPR1	-0.144597	2.15189	0.0348132	0.292096	-0.239705	3.45156	0.000943331	0.0116679	-0.299051	4.45057	3.11325e-05	0.00186278	-0.0300946	0.447703	0.655733	0.999975	0.056679	-0.838926	0.404331	0.999994	0.0802012	-1.17848	0.242546	0.99975	blue	grey
SDF2	-0.140622	2.04849	0.044216	0.318329	-0.24436	3.44419	0.000965593	0.011834	-0.298631	4.35036	4.473e-05	0.00230217	0.0234613	-0.341642	0.733631	0.999975	0.0208379	-0.301908	0.763606	0.999994	0.0549981	-0.791057	0.431549	0.99975	blue	tan
MTRNR2L12	-0.426835	3.2638	0.00169342	0.0810678	-0.128115	0.94785	0.346425	0.543906	-0.297482	2.27475	0.0259478	0.110817	-0.147101	1.1244	0.264635	0.999975	-0.237323	1.80487	0.0753417	0.999994	-0.0584798	0.44152	0.66018	0.99975	blue	grey
AC008038.1	-0.294754	2.46454	0.0161444	0.206631	-0.234771	1.89932	0.0615907	0.175227	-0.297278	2.4857	0.0152892	0.0798557	0.115624	-0.966421	0.337118	0.999975	-0.00604138	0.0502404	0.960072	0.999994	-0.0492286	0.40642	0.685658	0.99975	blue	magenta
NOP10	-0.202753	2.59029	0.0116322	0.182377	-0.16595	2.05133	0.0439309	0.141908	-0.296941	3.79368	0.000309443	0.00734456	0.0464908	-0.593729	0.554583	0.999975	-0.00393627	0.0500158	0.96025	0.999994	0.123005	-1.55161	0.125207	0.99975	blue	greenyellow
RPL13A	-0.228278	2.74992	0.00755828	0.152286	-0.13254	1.54483	0.126839	0.282377	-0.296678	3.57399	0.000637482	0.0111398	-0.0358756	0.432014	0.667043	0.999975	-0.146662	1.75717	0.0832055	0.999994	-0.0856408	1.01863	0.31184	0.99975	blue	magenta
CCDC28B	-0.174193	2.25382	0.0273008	0.259105	-0.265269	3.32088	0.00142045	0.0153811	-0.296216	3.83272	0.000271453	0.00671881	-0.0598462	0.774046	0.441477	0.999975	-0.0706811	0.909565	0.366134	0.999994	0.0770325	-0.984111	0.328407	0.99975	blue	brown
AC068631.3	-0.0704675	0.478933	0.63346	0.88414	-0.182746	1.20174	0.233462	0.422533	-0.295911	2.01121	0.0481065	0.163703	0.0238466	-0.162014	0.871755	0.999975	-0.0589862	0.398729	0.691291	0.999994	-0.0553665	0.371548	0.711338	0.99975	blue	grey
RPL26	-0.195921	2.32852	0.0227407	0.240319	-0.0671047	0.771667	0.442876	0.635419	-0.295515	3.51228	0.000777465	0.0124549	-0.0267053	0.317277	0.751966	0.999975	-0.0949555	1.12244	0.265464	0.999994	-0.109868	1.2893	0.201485	0.99975	blue	magenta
PEPD	-0.194564	2.16895	0.0334416	0.285958	-0.24617	2.65522	0.0097805	0.0540505	-0.294745	3.28584	0.00158267	0.0196332	0.10818	-1.20552	0.232009	0.999975	0.0751482	-0.833199	0.407531	0.999994	0.04491	-0.494325	0.622605	0.99975	blue	black
RPL19	-0.19506	2.5093	0.014384	0.198342	-0.140526	1.74911	0.0845994	0.214626	-0.291903	3.75521	0.000351816	0.00783831	0.0241565	-0.310642	0.756984	0.999975	-0.0361622	0.462681	0.64501	0.999994	-0.00318214	0.040419	0.967873	0.99975	blue	magenta
CARD19	-0.0922269	0.958062	0.341287	0.716259	-0.166517	1.67368	0.0986004	0.237496	-0.291829	3.03162	0.00339532	0.0312801	-0.0533192	0.553683	0.581538	0.999975	-0.0347042	0.358559	0.720991	0.999994	0.110332	-1.13167	0.261585	0.99975	blue	grey
PFDN6	-0.140534	1.65648	0.102044	0.443057	-0.120788	1.37755	0.172675	0.346212	-0.291477	3.43575	0.000991722	0.0144641	0.0537877	-0.633768	0.528271	0.999975	0.108764	-1.27507	0.206446	0.999994	0.105317	-1.22571	0.224366	0.99975	blue	grey
PTMA	-0.202231	2.30489	0.0241046	0.244878	-0.155596	1.71584	0.090558	0.223891	-0.291293	3.32004	0.00142416	0.0183945	-0.0395648	0.450768	0.653532	0.999975	-0.130279	1.47679	0.14416	0.999994	-0.0758996	0.854129	0.395911	0.99975	blue	magenta
SMDT1	-0.212229	3.22388	0.00191284	0.0860648	-0.247566	3.63867	0.000516618	0.00776401	-0.290943	4.4197	3.48249e-05	0.00201259	-0.00843226	0.128044	0.898477	0.999975	-0.0245756	0.371295	0.711525	0.999994	0.0946997	-1.42038	0.159881	0.99975	blue	grey
UCHL1	-0.210438	2.0192	0.0472484	0.32513	-0.244061	2.26586	0.0265153	0.102931	-0.288788	2.77107	0.00712987	0.0496219	-0.00755124	0.0724296	0.942464	0.999975	-0.0694633	0.662909	0.509539	0.999994	0.0499553	-0.473281	0.637467	0.99975	blue	blue
TIMM8B	-0.226128	2.6634	0.00956743	0.16633	-0.213924	2.43791	0.0172814	0.0777474	-0.288677	3.4002	0.0011092	0.0155481	-0.0406417	0.478514	0.633757	0.999975	-0.02371	0.27775	0.782012	0.999994	0.0259327	-0.301585	0.763851	0.99975	blue	tan
PMM1	-0.235861	2.96093	0.00416965	0.11746	-0.214507	2.60549	0.0111721	0.0584065	-0.288497	3.62179	0.000545871	0.0101574	0.0257384	-0.322994	0.74765	0.999975	-0.0120194	0.150071	0.881135	0.999994	0.0650953	-0.806868	0.422441	0.99975	blue	turquoise
RPL10A	-0.174915	2.45863	0.0163911	0.207127	-0.150391	2.04533	0.0445344	0.142904	-0.288222	4.05136	0.000128621	0.00423723	0.000288773	-0.00405753	0.996774	0.999975	-0.0774412	1.08262	0.282644	0.999994	0.0184141	-0.255562	0.799029	0.99975	blue	magenta
TOMM7	-0.142326	1.88099	0.0640806	0.370713	-0.146701	1.87591	0.0647843	0.180753	-0.287948	3.80563	0.000297304	0.00717304	0.00959333	-0.12674	0.899505	0.999975	-0.0942815	1.23928	0.219329	0.999994	-0.0379331	0.494995	0.622134	0.99975	blue	tan
EIF3K	-0.196347	2.35627	0.0212273	0.23295	-0.183777	2.13389	0.0363121	0.125305	-0.287642	3.45196	0.000942135	0.0141554	-0.0496843	0.596022	0.553059	0.999975	-0.00967941	0.115529	0.908352	0.999994	0.108918	-1.29058	0.201043	0.99975	blue	tan
GUK1	-0.256715	3.48668	0.000843706	0.0571459	-0.325178	4.27327	5.89457e-05	0.00167706	-0.287544	3.9055	0.000212233	0.0057408	-6.03241e-05	0.000819018	0.999349	0.999975	-0.013216	0.178526	0.858819	0.999994	0.0610509	-0.818719	0.41569	0.99975	blue	grey
NDUFB11	-0.266402	3.50554	0.00079441	0.0549051	-0.174561	2.22251	0.0294398	0.109706	-0.287475	3.78294	0.000320753	0.00748114	-0.0462525	0.608408	0.544862	0.999975	-0.0372731	0.487816	0.627186	0.999994	0.0730668	-0.949335	0.345675	0.99975	blue	magenta
ZNRD1	-0.162196	2.03034	0.0460745	0.321111	-0.252198	3.05457	0.00317424	0.0261809	-0.287294	3.59639	0.000592867	0.0106324	-0.0132918	0.166324	0.868375	0.999975	-0.0545266	0.67886	0.499437	0.999994	-0.0325296	0.402059	0.68885	0.99975	blue	magenta
NDUFS7	-0.315713	3.53384	0.000725531	0.0528513	-0.176329	1.90966	0.0602231	0.173097	-0.287239	3.2152	0.00196398	0.0225293	0.0205504	-0.229941	0.8188	0.999975	-0.0205054	0.228278	0.820087	0.999994	0.0784298	-0.866797	0.388978	0.99975	blue	tan
HTRA2	-0.240307	3.53342	0.000726518	0.0528513	-0.365989	5.20684	1.79659e-06	0.000113431	-0.287137	4.22211	7.06983e-05	0.00295589	0.0389242	-0.572124	0.569048	0.999975	-0.0478974	0.700458	0.485934	0.999994	0.0120799	-0.175377	0.861283	0.99975	blue	grey
TMED3	-0.173531	1.99573	0.0498064	0.332079	-0.264747	2.946	0.00435283	0.0321582	-0.286231	3.29193	0.00155326	0.0194393	0.0107457	-0.123538	0.90203	0.999975	0.068447	-0.782924	0.436279	0.999994	0.120283	-1.36587	0.176298	0.99975	blue	pink
RPL37	-0.234037	2.81918	0.00623695	0.140814	-0.116994	1.36357	0.177016	0.352429	-0.286145	3.44695	0.000957207	0.014268	-0.0403318	0.485654	0.62871	0.999975	-0.128973	1.54518	0.126755	0.999994	-0.0378103	0.449706	0.654294	0.99975	blue	magenta
ATOX1	-0.12949	1.05374	0.295582	0.681408	-0.0891146	0.70165	0.485194	0.670513	-0.286125	2.32841	0.022747	0.101489	-0.00170135	0.0138397	0.988997	0.999975	0.00949217	-0.0768248	0.938979	0.999994	0.158812	-1.27603	0.206111	0.99975	blue	pink
DYNLL1	-0.247951	3.63983	0.000514659	0.0439559	-0.234953	3.33713	0.00135063	0.0148508	-0.286087	4.19974	7.65177e-05	0.0031453	-0.0432276	0.634333	0.527905	0.999975	-0.0270966	0.395613	0.693579	0.999994	0.0875476	-1.26894	0.208613	0.99975	blue	greenyellow
AC020904.2	-0.259727	1.84617	0.0690422	0.381433	-0.143231	0.985072	0.327939	0.525598	-0.286059	2.03338	0.0457582	0.158645	0.0649248	-0.461323	0.645979	0.999975	0.00819282	-0.05792	0.953975	0.999994	-0.0279426	0.196111	0.845085	0.99975	blue	brown
RPL28	-0.259193	2.48106	0.0154734	0.20405	-0.00370275	0.0342938	0.972739	0.986871	-0.285614	2.73403	0.00789548	0.0532068	-0.0133552	0.127792	0.898675	0.999975	-0.131263	1.24967	0.215529	0.999994	-0.0310805	0.293753	0.769805	0.99975	blue	magenta
CD63	-0.302435	3.58941	0.000606446	0.0474595	-0.31279	3.59187	0.000601621	0.00863446	-0.283196	3.36115	0.00125337	0.0167641	0.137946	-1.63659	0.106148	0.999975	0.0954183	-1.12633	0.263826	0.999994	0.146979	-1.72237	0.0893626	0.99975	blue	pink
PARK7	-0.211949	2.99044	0.00382839	0.113041	-0.250785	3.4236	0.00103048	0.0123228	-0.282564	3.98687	0.000160699	0.00480763	-0.00937665	0.132249	0.895162	0.999975	0.00882793	-0.123881	0.90176	0.999994	0.101774	-1.41783	0.160621	0.99975	blue	tan
PFDN5	-0.179738	2.69556	0.00876967	0.160101	-0.209499	3.03997	0.00331329	0.026992	-0.282217	4.23256	6.81263e-05	0.00292913	-0.0179787	0.269531	0.788304	0.999975	-0.0797078	1.18892	0.238439	0.999994	-0.00613418	0.0908336	0.927881	0.99975	blue	magenta
ENDOV	-0.199212	2.38384	0.0198133	0.225614	-0.148576	1.72023	0.0897523	0.222459	-0.281965	3.37417	0.00120343	0.0163677	-0.112222	1.3424	0.183749	0.999975	-0.0609536	0.725442	0.470569	0.999994	0.00870472	-0.102848	0.918374	0.99975	blue	blue
C19orf25	-0.174959	2.59492	0.0114902	0.181495	-0.205873	2.95438	0.00424904	0.0316679	-0.281395	4.17364	8.38959e-05	0.00332695	-0.0342048	0.507128	0.613639	0.999975	-0.0512402	0.75586	0.452238	0.999994	0.0976915	-1.43063	0.156929	0.99975	blue	turquoise
CHMP6	-0.089958	1.14149	0.257506	0.646824	-0.200038	2.45597	0.0165029	0.0754845	-0.281392	3.57072	0.000644251	0.0111926	-0.0885158	1.12278	0.265318	0.999975	0.0326435	-0.411975	0.6816	0.999994	0.0407643	-0.510734	0.611124	0.99975	blue	grey
MYL6B	-0.266174	3.41103	0.0010721	0.065008	-0.203925	2.52853	0.0136821	0.0668629	-0.281134	3.60283	0.000580602	0.0105713	-0.0170893	0.21892	0.827341	0.999975	-0.059105	0.75333	0.453746	0.999994	0.0505308	-0.639377	0.524638	0.99975	blue	magenta
TMEM120A	-0.422609	4.04758	0.000130317	0.0214362	-0.428617	3.97195	0.000169146	0.00359817	-0.280184	2.68356	0.00906007	0.0580675	0.037436	-0.358416	0.721097	0.999975	0.116603	-1.11072	0.27044	0.999994	0.208093	-1.96787	0.0529955	0.99975	blue	pink
CTU2	-0.221918	2.29216	0.0248684	0.248771	-0.2015	2.01375	0.0478323	0.149629	-0.280081	2.89299	0.00506517	0.0403426	-0.0148016	0.152827	0.878969	0.999975	0.070937	-0.728729	0.468568	0.999994	0.104859	-1.0694	0.288517	0.99975	blue	grey
RFC2	-0.146838	1.66985	0.0993584	0.440543	-0.207413	2.2822	0.0254809	0.100202	-0.279464	3.17817	0.00219679	0.0240456	-0.0282419	0.321051	0.749116	0.999975	0.0910037	-1.0293	0.306839	0.999994	0.0412925	-0.463652	0.644317	0.99975	blue	turquoise
MYDGF	-0.155307	1.8947	0.0622101	0.366035	-0.21323	2.51696	0.0141004	0.068311	-0.27917	3.40589	0.00108957	0.0153748	0.0761933	-0.9292	0.355939	0.999975	0.0805071	-0.976847	0.331966	0.999994	0.134934	-1.62538	0.108519	0.99975	blue	pink
WDR83	-0.233153	1.83328	0.0709593	0.386317	-0.169666	1.2908	0.200966	0.382663	-0.279168	2.19514	0.031429	0.124874	0.00838587	-0.0659138	0.947632	0.999975	0.054552	-0.426618	0.67095	0.999994	0.010886	-0.0845153	0.932885	0.99975	blue	grey
NHP2	-0.164423	2.33586	0.0223313	0.237958	-0.15983	2.19695	0.0312941	0.113897	-0.279156	3.96591	0.000172683	0.00500693	0.0544582	-0.773374	0.441872	0.999975	0.0920228	-1.30024	0.197731	0.999994	0.142149	-1.99394	0.0500061	0.99975	blue	grey
PQBP1	-0.250501	3.05585	0.00316223	0.105538	-0.188433	2.22412	0.0293266	0.109477	-0.278301	3.39506	0.00112724	0.0156456	-0.0796784	0.971638	0.334534	0.999975	0.0233569	-0.283387	0.777706	0.999994	0.124599	-1.50078	0.137852	0.99975	blue	tan
CDK4	-0.141449	1.92869	0.0577729	0.355524	-0.297286	3.92205	0.000200606	0.00408277	-0.27807	3.79163	0.000311568	0.00734456	0.0571412	-0.778847	0.438661	0.999975	0.0442533	-0.600136	0.550329	0.999994	0.0472741	-0.636454	0.52653	0.99975	blue	pink
MRPL28	-0.24094	3.43724	0.000987048	0.0628334	-0.232333	3.20693	0.00201385	0.0193423	-0.277763	3.96265	0.000174622	0.00504586	0.0224806	-0.32059	0.749464	0.999975	0.0398332	-0.565181	0.573735	0.999994	0.10676	-1.5038	0.137074	0.99975	blue	greenyellow
SOD1	-0.230906	3.43131	0.00100571	0.0635437	-0.231131	3.32323	0.00141013	0.0153264	-0.276891	4.11476	0.000103148	0.0036926	0.00438934	-0.0652027	0.948196	0.999975	-0.0633304	0.936006	0.352447	0.999994	0.0333775	-0.489734	0.625834	0.99975	blue	tan
PSMB6	-0.224688	3.15893	0.0023277	0.0926202	-0.236513	3.21731	0.00195145	0.0189897	-0.276509	3.88759	0.000225536	0.00600775	-0.00674446	0.0947869	0.924751	0.999975	0.0144124	-0.201529	0.840862	0.999994	0.0809506	-1.12373	0.264919	0.99975	blue	greenyellow
POLE4	-0.290639	2.81731	0.00626951	0.141172	-0.271049	2.54219	0.0132025	0.0654062	-0.276282	2.67821	0.00919224	0.0585468	0.0179827	-0.174252	0.862164	0.999975	0.120815	-1.16478	0.248013	0.999994	0.126841	-1.21401	0.228773	0.99975	blue	grey
NDUFB8	-0.175086	2.19266	0.0316154	0.279687	-0.248909	3.01605	0.00355344	0.0279084	-0.276114	3.45795	0.000924416	0.013976	-0.0137957	0.172704	0.863376	0.999975	-0.104278	1.29883	0.19821	0.999994	0.0689995	-0.853191	0.396427	0.99975	blue	magenta
NUBP2	-0.254242	3.39647	0.00112227	0.0657559	-0.252384	3.26227	0.00170139	0.0172823	-0.276087	3.68839	0.000438877	0.00888936	-0.0487613	0.651174	0.517039	0.999975	0.000887878	-0.0117971	0.990621	0.999994	0.0316294	-0.417208	0.677787	0.99975	blue	grey
MRPL55	-0.284878	3.13147	0.00252717	0.0961954	-0.29898	3.17987	0.00218557	0.020424	-0.275458	3.028	0.00343152	0.0314767	-0.0296964	0.326313	0.745149	0.999975	0.00640431	-0.0700169	0.944377	0.999994	0.0202884	-0.2202	0.826348	0.99975	blue	magenta
TRIR	-0.172103	2.418	0.018178	0.216461	-0.161302	2.19273	0.03161	0.114542	-0.27542	3.86967	0.000239648	0.00626228	-0.0150934	0.21198	0.832731	0.999975	-0.0103126	0.144104	0.885827	0.999994	0.0750888	-1.04166	0.30111	0.99975	blue	greenyellow
RPL31	-0.234688	3.2392	0.0018257	0.0837793	-0.152063	2.03071	0.0460361	0.145897	-0.275008	3.79579	0.000307262	0.00730739	-0.0172395	0.237855	0.812679	0.999975	-0.100522	1.37991	0.17195	0.999994	-0.0521257	0.710361	0.47981	0.99975	blue	magenta
EEF1B2	-0.211559	3.07483	0.00299025	0.102291	-0.248388	3.49299	0.0008269	0.0106641	-0.274691	3.99249	0.00015762	0.00476631	-0.0187139	0.271891	0.786496	0.999975	0.00828969	-0.119831	0.904956	0.999994	0.0603053	-0.865417	0.389729	0.99975	blue	greenyellow
TALDO1	-0.253396	3.0397	0.00331591	0.106949	-0.245493	2.84937	0.00573035	0.0381565	-0.27438	3.2915	0.00155532	0.0194507	0.112462	-1.34859	0.181761	0.999975	0.0496521	-0.592394	0.555471	0.999994	0.0705384	-0.835484	0.406252	0.99975	blue	grey
NTHL1	-0.292162	3.38347	0.00116896	0.0671661	-0.273802	3.06798	0.0030513	0.025427	-0.274072	3.17405	0.00222424	0.024079	-0.135825	1.57239	0.120312	0.999975	-0.141714	1.63227	0.107056	0.999994	-0.0194246	0.222112	0.824865	0.99975	blue	turquoise
GPR108	-0.23716	2.7255	0.00808218	0.156044	-0.237794	2.64413	0.0100764	0.0549334	-0.273304	3.14095	0.00245659	0.0256616	-0.115694	1.3291	0.188076	0.999975	-0.0748439	0.855466	0.395175	0.999994	-0.0054803	0.0621856	0.95059	0.99975	blue	turquoise
ATP5PO	-0.202626	2.99752	0.00375048	0.112155	-0.206557	2.95653	0.00422282	0.0315501	-0.273203	4.04168	0.000133011	0.00430761	0.00100485	-0.0148597	0.988186	0.999975	-0.00186719	0.0274724	0.97816	0.999994	0.113647	-1.65999	0.101334	0.99975	blue	tan
AC092017.2	-0.315888	2.47022	0.015911	0.206097	-0.0281927	0.213312	0.831696	0.908182	-0.271984	2.12694	0.0369062	0.138198	-0.121568	0.950304	0.345186	0.999975	-0.219191	1.70477	0.0926169	0.999994	0.00264598	-0.02043	0.983758	0.99975	blue	magenta
MANBAL	-0.127418	1.88165	0.0639897	0.370567	-0.225636	3.22398	0.0019123	0.0187066	-0.27192	4.01566	0.000145526	0.00452977	-0.018497	0.273053	0.785606	0.999975	0.0040488	-0.0594667	0.952748	0.999994	0.0548955	-0.800431	0.426135	0.99975	blue	tan
NAA10	-0.226788	2.50933	0.0143826	0.198342	-0.158512	1.69698	0.0940863	0.230026	-0.270927	2.99778	0.0037476	0.0333639	-0.0145132	0.160525	0.872924	0.999975	0.0817005	-0.899091	0.371648	0.999994	0.102885	-1.12401	0.2648	0.99975	blue	greenyellow
NDUFB10	-0.244343	3.18626	0.00214384	0.0895891	-0.202269	2.55204	0.012866	0.0642654	-0.270195	3.52345	0.000750137	0.0121549	-0.022769	0.296801	0.767486	0.999975	-0.00794252	0.10301	0.918245	0.999994	0.0329087	-0.423714	0.673057	0.99975	blue	tan
ERP29	-0.156209	2.31136	0.0237243	0.24353	-0.161705	2.31506	0.023509	0.0948483	-0.26948	3.98746	0.000160368	0.00480623	-0.00388849	0.0575152	0.954297	0.999975	0.0103391	-0.152155	0.879497	0.999994	-0.0503374	0.735415	0.464513	0.99975	blue	magenta
PRDX2	-0.239608	2.85113	0.00570202	0.136181	-0.200022	2.30287	0.0242242	0.0967829	-0.26946	3.20642	0.00201701	0.0229068	-0.00396321	0.0471415	0.962533	0.999975	0.00480721	-0.0568918	0.954791	0.999994	0.0881056	-1.03514	0.304121	0.99975	blue	brown
FIBP	-0.273249	3.3633	0.00124501	0.0685406	-0.201992	2.40558	0.018758	0.0820153	-0.269141	3.31282	0.0014563	0.0186533	0.00240126	-0.0295452	0.976513	0.999975	0.0499955	-0.61204	0.542469	0.999994	0.121664	-1.4786	0.143677	0.99975	blue	greenyellow
RPL13	-0.257234	3.37229	0.00121055	0.0679394	-0.14272	1.81033	0.0744818	0.197217	-0.269095	3.52787	0.000739588	0.0120242	0.0293199	-0.384238	0.701952	0.999975	0.0185654	-0.242071	0.809424	0.999994	0.0292812	-0.379024	0.705803	0.99975	blue	magenta
RBBP4P1	-0.36122	2.94489	0.00436676	0.120296	-0.376921	2.9732	0.00402443	0.0305499	-0.269023	2.19329	0.0315676	0.125214	0.116501	-0.949439	0.345623	0.999975	-0.0544648	0.441625	0.660104	0.999994	0.0409955	-0.33	0.742373	0.99975	blue	grey
DCXR	-0.17554	2.25543	0.0271941	0.259105	-0.109423	1.36031	0.178041	0.353845	-0.267907	3.44229	0.000971421	0.0143613	0.00856278	-0.109979	0.912737	0.999975	0.0475883	-0.608128	0.545046	0.999994	0.140008	-1.77618	0.0799937	0.99975	blue	greenyellow
CUTA	-0.31053	3.62125	0.000546823	0.0449483	-0.149817	1.69041	0.0953417	0.23206	-0.267802	3.12305	0.00259148	0.026516	0.00927289	-0.108096	0.914225	0.999975	-0.0400377	0.464371	0.643805	0.999994	0.0479851	-0.552513	0.582335	0.99975	blue	greenyellow
RPS3	-0.239997	3.3813	0.0011769	0.0673257	-0.207871	2.83367	0.00598878	0.0391839	-0.267488	3.76873	0.000336328	0.00764436	0.000593579	-0.00835985	0.993353	0.999975	-0.0261355	0.366228	0.715286	0.999994	0.0189126	-0.263094	0.793241	0.99975	blue	magenta
MED22	-0.162924	2.27394	0.0259995	0.253451	-0.234663	3.16896	0.00225857	0.0208853	-0.266702	3.72246	0.000392187	0.00832193	-0.0437022	0.60973	0.54399	0.999975	0.0200077	-0.277736	0.782024	0.999994	-0.0663725	0.914667	0.363467	0.99975	blue	turquoise
TMEM258	-0.147671	1.75094	0.0842813	0.411929	-0.118129	1.35522	0.17965	0.355624	-0.266577	3.16088	0.00231406	0.0246595	-0.0271504	0.321805	0.748547	0.999975	-0.137423	1.6206	0.109543	0.999994	0.00392937	-0.0460023	0.963438	0.99975	blue	magenta
TMEM205	-0.279108	2.70343	0.00858407	0.158338	-0.194755	1.82519	0.0721843	0.19331	-0.266468	2.58106	0.0119196	0.0680211	0.0153573	-0.148696	0.882216	0.999975	-0.00899053	0.0866102	0.931226	0.999994	0.0515989	-0.493474	0.623203	0.99975	blue	brown
OAZ1	-0.261888	3.42461	0.00102718	0.063995	-0.21723	2.74849	0.00758805	0.0457743	-0.266366	3.48326	0.000852969	0.0131662	-0.0177876	0.232517	0.816806	0.999975	-0.033055	0.429908	0.668566	0.999994	0.0468868	-0.60538	0.54686	0.99975	blue	greenyellow
PRDX1	-0.219346	2.52364	0.0138574	0.19603	-0.213944	2.38165	0.0199227	0.0853837	-0.266336	3.06435	0.0030841	0.0294113	0.00422109	-0.0485472	0.961417	0.999975	-0.037915	0.433861	0.665707	0.999994	0.0633759	-0.719953	0.47392	0.99975	blue	grey
TMEM223	-0.281215	3.59168	0.000601999	0.0474123	-0.221607	2.73854	0.00779842	0.0467436	-0.266094	3.39863	0.00111469	0.0155746	-0.0494617	0.631492	0.52975	0.999975	0.00257927	-0.032764	0.973955	0.999994	0.0425195	-0.536201	0.593498	0.99975	blue	black
CIAO2B	-0.27632	3.20198	0.00204429	0.0877684	-0.260503	2.92077	0.00467938	0.0336482	-0.265886	3.08115	0.00293488	0.0285776	0.0415742	-0.481584	0.631585	0.999975	-0.0165234	0.190436	0.849512	0.999994	0.0750289	-0.858453	0.393536	0.99975	blue	greenyellow
PSMD8	-0.184447	2.53698	0.0133834	0.192594	-0.231986	3.08736	0.00288143	0.0245553	-0.265141	3.64699	0.000502752	0.00963019	0.043325	-0.595699	0.553273	0.999975	0.0297834	-0.407439	0.684913	0.999994	0.0848646	-1.15254	0.252972	0.99975	blue	pink
STX8	-0.192369	2.35401	0.0213471	0.233508	-0.0868537	1.02835	0.307282	0.503889	-0.26468	3.23896	0.00182701	0.0214958	-0.0449193	0.549476	0.584406	0.999975	-0.0508312	0.618651	0.538129	0.999994	-0.00981619	0.118604	0.905925	0.99975	blue	magenta
MRPS12	-0.139096	1.65287	0.102779	0.444193	-0.153481	1.76464	0.0819306	0.210106	-0.263334	3.12928	0.0025438	0.0262488	-0.00310696	0.0369065	0.970663	0.999975	0.0525654	-0.621251	0.536427	0.999994	0.157203	-1.84446	0.0692939	0.99975	blue	greenyellow
RPS6	-0.180023	2.46992	0.0159232	0.206097	-0.176803	2.34704	0.0217206	0.0901677	-0.263157	3.61061	0.000566104	0.0103994	0.0443498	-0.608258	0.54496	0.999975	-0.00743459	0.10145	0.919479	0.999994	0.00984428	-0.133358	0.894288	0.99975	blue	magenta
BANF1	-0.244906	3.389	0.00114889	0.0666237	-0.184147	2.46556	0.0161025	0.0743357	-0.262341	3.63035	0.00053083	0.0100207	-0.00290389	0.0401692	0.968071	0.999975	0.0226305	-0.311463	0.756362	0.999994	0.0756429	-1.03353	0.304871	0.99975	blue	magenta
SURF2	-0.286895	3.75379	0.000353472	0.0374084	-0.220453	2.79089	0.00674868	0.042453	-0.261552	3.42229	0.00103475	0.0148734	0.00843908	-0.110378	0.912421	0.999975	-0.0518223	0.674382	0.502262	0.999994	0.113954	-1.47218	0.145398	0.99975	blue	greenyellow
MOCS3	-0.180698	2.57078	0.0122474	0.184341	-0.237539	3.26982	0.00166248	0.0170198	-0.261239	3.71673	0.000399701	0.00839778	-0.0504646	0.717695	0.475303	0.999975	-0.0937575	1.32666	0.188879	0.999994	0.10188	-1.43115	0.156782	0.99975	blue	brown
TARBP2	-0.132599	1.96053	0.0538634	0.344229	-0.257273	3.6805	0.000450423	0.0070295	-0.260609	3.85332	0.000253253	0.00645833	-0.0546318	0.807462	0.422101	0.999975	0.0353624	-0.520018	0.604671	0.999994	0.0830899	-1.21301	0.229152	0.99975	blue	turquoise
CLTA	-0.173883	2.72821	0.00802252	0.156044	-0.254284	3.86026	0.000247394	0.00468446	-0.258827	4.06106	0.000124364	0.0041783	0.0428039	-0.671342	0.504184	0.999975	-0.0222109	0.346598	0.72992	0.999994	0.0632917	-0.9805	0.330173	0.99975	blue	pink
MRPL51	-0.214447	2.94282	0.00439278	0.120296	-0.22859	3.03514	0.00336052	0.0271084	-0.258739	3.55072	0.000687196	0.0115341	-0.00186223	0.0255457	0.979691	0.999975	0.00254987	-0.0348018	0.972336	0.999994	0.0662262	-0.897334	0.372578	0.99975	blue	greenyellow
PSMG3	-0.175672	2.11187	0.0382223	0.300836	-0.217429	2.52907	0.0136629	0.0668434	-0.258647	3.10945	0.00269863	0.0272648	-0.0428964	0.515498	0.607809	0.999975	0.036602	-0.437635	0.662981	0.999994	0.0748132	-0.888024	0.37753	0.99975	blue	pink
SLC25A6	-0.271158	3.1305	0.00253451	0.0961954	-0.19535	2.18214	0.0324149	0.116288	-0.258345	2.98265	0.0039158	0.0342668	0.044401	-0.51242	0.60995	0.999975	0.0547232	-0.628354	0.531791	0.999994	0.0618815	-0.705398	0.482874	0.99975	blue	grey
RNF113A	-0.220403	2.3252	0.0229285	0.240319	-0.176254	1.79911	0.0762568	0.200444	-0.257418	2.71576	0.00830029	0.054667	-0.08769	0.92477	0.358223	0.999975	-0.134454	1.41078	0.162683	0.999994	-0.134889	1.40508	0.164365	0.99975	blue	blue
NFKBIB	-0.101262	0.835589	0.406193	0.761206	0.113405	-0.905437	0.368301	0.565407	-0.25623	2.1144	0.0379987	0.140641	0.0106819	-0.0881123	0.930036	0.999975	-0.0357177	0.293138	0.770273	0.999994	0.0449729	-0.36642	0.715143	0.99975	blue	pink
AP2S1	-0.218076	2.4649	0.0161294	0.206596	-0.159051	1.73943	0.0862999	0.217542	-0.255793	2.89129	0.00508968	0.0403961	0.01002	-0.113214	0.910181	0.999975	-0.0670835	0.754134	0.453266	0.999994	0.0888058	-0.991092	0.325011	0.99975	blue	greenyellow
MIEN1	-0.144318	2.05709	0.0433574	0.315095	-0.153713	2.11994	0.0375125	0.127601	-0.255676	3.64447	0.000506915	0.0096662	-0.00892789	0.127211	0.899134	0.999975	-0.0442238	0.626949	0.532707	0.999994	0.087625	-1.23323	0.221563	0.99975	blue	greenyellow
STOML2	-0.195023	2.75023	0.00755173	0.152286	-0.240867	3.28653	0.00157928	0.0164828	-0.255498	3.60314	0.000580019	0.0105713	-0.00718766	0.101324	0.919579	0.999975	0.0215526	-0.302291	0.763315	0.999994	0.0309559	-0.43103	0.667754	0.99975	blue	black
CIDECP1	-0.0662199	0.719193	0.474386	0.802796	-0.0489126	0.513991	0.608857	0.768503	-0.255467	2.77461	0.00706029	0.0494016	0.0281895	-0.306045	0.760467	0.999975	-0.0181722	0.196293	0.844942	0.999994	0.0303397	-0.325349	0.745875	0.99975	blue	grey
WDR54	-0.274849	3.10599	0.00272655	0.0986512	-0.26661	2.91514	0.00475528	0.0339345	-0.255093	2.88279	0.00521388	0.0410121	0.0520226	-0.587676	0.558617	0.999975	-0.116128	1.30522	0.196037	0.999994	-0.0674958	0.753118	0.453873	0.99975	blue	turquoise
EXOSC5	-0.175172	1.68191	0.0969855	0.436654	-0.142701	1.32569	0.189197	0.367646	-0.254736	2.44591	0.0169328	0.0846484	-0.000736283	0.00706682	0.994381	0.999975	0.0123332	-0.117776	0.906578	0.999994	0.0598865	-0.567739	0.572006	0.99975	blue	grey
ZNHIT1	-0.21761	3.24918	0.00177088	0.0824719	-0.177086	2.55833	0.0126552	0.0635124	-0.254733	3.80358	0.000299359	0.00717304	0.0098939	-0.147674	0.883019	0.999975	0.0103924	-0.154331	0.877787	0.999994	0.0980213	-1.4451	0.152836	0.99975	blue	greenyellow
TRAPPC6A	-0.326299	3.18062	0.0021806	0.0897425	-0.34739	3.27636	0.00162945	0.0167831	-0.254698	2.48275	0.0154061	0.0802327	0.131884	-1.28508	0.202947	0.999975	0.105321	-1.02106	0.310696	0.999994	0.131904	-1.26951	0.20841	0.99975	blue	brown
NUDT16L1	-0.211932	2.57807	0.012014	0.182796	-0.246996	2.90715	0.00486501	0.0344228	-0.254024	3.09019	0.00285736	0.0280973	-0.00549753	0.0668511	0.946888	0.999975	0.0554458	-0.670826	0.504511	0.999994	0.165838	-1.99189	0.0502358	0.99975	blue	tan
IFT43	-0.196911	2.94341	0.0043853	0.120296	-0.17841	2.58035	0.0119421	0.0612402	-0.252843	3.77957	0.000324377	0.00749225	0.00385188	-0.0575566	0.954264	0.999975	-0.0240517	0.357576	0.721723	0.999994	0.076044	-1.12235	0.265502	0.99975	blue	tan
MLST8	-0.192504	2.59758	0.0114094	0.181495	-0.134505	1.75609	0.0833923	0.212439	-0.25283	3.41167	0.00106992	0.0151988	0.0195912	-0.264259	0.792347	0.999975	-0.0399512	0.536167	0.593522	0.999994	0.0122341	-0.162998	0.870984	0.99975	blue	turquoise
EIF6	-0.242181	3.31602	0.00144197	0.0739904	-0.211952	2.80797	0.00643523	0.0411355	-0.251715	3.44664	0.000958133	0.0142692	0.0432697	-0.592246	0.55557	0.999975	0.0698761	-0.951583	0.344541	0.999994	0.123611	-1.67115	0.0991005	0.99975	blue	pink
RPS8	-0.169992	2.1339	0.0363114	0.296194	-0.0633536	0.769475	0.444168	0.636464	-0.251688	3.1595	0.00232372	0.0246929	-0.0288934	0.362564	0.718009	0.999975	-0.143742	1.79462	0.0769775	0.999994	-0.0309842	0.384031	0.702105	0.99975	blue	magenta
NDUFS8	-0.239727	2.45874	0.0163862	0.207127	-0.102065	1.01286	0.314569	0.512026	-0.251633	2.58092	0.011924	0.0680211	0.0586584	-0.601405	0.549488	0.999975	0.0643679	-0.656609	0.513558	0.999994	0.10708	-1.08439	0.281866	0.99975	blue	tan
ASNA1	-0.20795	2.98952	0.00383858	0.113041	-0.261301	3.63465	0.000523443	0.00780921	-0.25146	3.61512	0.000557843	0.0102897	0.0235469	-0.33839	0.736069	0.999975	0.0456416	-0.652597	0.516126	0.999994	0.0791706	-1.1238	0.264889	0.99975	blue	tan
PHB	-0.220649	2.87214	0.00537364	0.132256	-0.25047	3.15454	0.00235856	0.0215651	-0.251045	3.26787	0.00167244	0.0202957	0.0593846	-0.772712	0.442261	0.999975	0.0954545	-1.23578	0.22062	0.999994	0.142406	-1.83026	0.0714144	0.99975	blue	greenyellow
CHMP2A	-0.216862	3.05198	0.00319844	0.105538	-0.202009	2.75072	0.00754166	0.0456898	-0.250922	3.53141	0.000731235	0.0119838	-0.0179742	0.252865	0.801104	0.999975	-0.00732309	0.102503	0.918647	0.999994	0.0243233	-0.337988	0.736371	0.99975	blue	tan
CSTB	-0.260155	2.73964	0.00777499	0.152987	-0.139304	1.41939	0.160168	0.32912	-0.250895	2.64218	0.0101294	0.0618242	0.156267	-1.64501	0.104396	0.999975	-0.0122076	0.127859	0.898623	0.999994	0.0266778	-0.277391	0.782287	0.99975	blue	magenta
PAFAH1B3	-0.284962	2.46737	0.0160275	0.206226	-0.176574	1.47929	0.143492	0.305899	-0.250677	2.17057	0.0333141	0.129175	-0.124582	1.07832	0.284547	0.999975	-0.153201	1.31932	0.191306	0.999994	0.0354485	-0.30306	0.762732	0.99975	blue	blue
LAMTOR1	-0.168523	2.40667	0.0187067	0.21982	-0.169736	2.34535	0.021812	0.0903481	-0.250556	3.57825	0.00062875	0.0110383	0.00751026	-0.107214	0.914922	0.999975	0.0422154	-0.599609	0.550678	0.999994	0.116746	-1.64619	0.104151	0.99975	blue	greenyellow
LAGE3	-0.214017	2.5554	0.0127529	0.187993	-0.206026	2.38018	0.0199963	0.0856428	-0.250136	2.98673	0.00386975	0.0340397	-0.00303229	0.0361928	0.97123	0.999975	-0.0559156	0.664026	0.508828	0.999994	0.059699	-0.703815	0.483853	0.99975	blue	tan
RPL36AL	-0.159433	1.6343	0.106629	0.452031	-0.144408	1.43227	0.156462	0.324558	-0.249611	2.55875	0.0126414	0.0704598	-0.0365165	0.374183	0.709385	0.999975	0.00492089	-0.0501694	0.960128	0.999994	0.113648	-1.15026	0.253901	0.99975	blue	pink
MCRIP1	-0.223403	3.01944	0.0035184	0.108125	-0.193309	2.52794	0.0137031	0.0669265	-0.249278	3.36924	0.00122213	0.0165043	-0.0211431	0.285659	0.775973	0.999975	-0.0287513	0.386488	0.700293	0.999994	0.0670352	-0.894586	0.374035	0.99975	blue	grey
ZNF622	-0.159052	2.21849	0.0297247	0.271268	-0.228322	3.08137	0.00293295	0.0248941	-0.24805	3.45994	0.000918599	0.0139129	0.144642	-2.01677	0.0475082	0.999975	0.0969011	-1.34428	0.183144	0.999994	0.037075	-0.510601	0.611217	0.99975	blue	pink
NAGK	-0.156336	1.95198	0.0548904	0.347591	-0.247325	2.98788	0.00385685	0.0295378	-0.24789	3.09519	0.00281532	0.0278394	0.00668976	-0.0834969	0.933692	0.999975	0.022972	-0.285271	0.776268	0.999994	0.0653349	-0.805461	0.423247	0.99975	blue	purple
ABHD14A	-0.251485	3.07604	0.00297951	0.102291	-0.202995	2.40238	0.0189102	0.0823751	-0.247264	3.02448	0.00346698	0.0316476	-0.0101748	0.124408	0.901345	0.999975	-0.0123341	0.150047	0.881154	0.999994	0.13934	-1.68281	0.096811	0.99975	blue	green
AKR1A1	-0.258457	3.33761	0.00134864	0.071813	-0.258128	3.22521	0.00190512	0.0186868	-0.247091	3.1909	0.00211396	0.0234663	0.0416013	-0.537025	0.592932	0.999975	0.0610436	-0.784022	0.435639	0.999994	0.105362	-1.34343	0.183419	0.99975	blue	greenyellow
BCAP31	-0.31586	3.56387	0.000658657	0.0500136	-0.259567	2.8337	0.00598826	0.0391839	-0.247003	2.78702	0.00682152	0.0484317	0.0599556	-0.676237	0.50109	0.999975	0.0655896	-0.736045	0.464131	0.999994	0.0804268	-0.896005	0.373282	0.99975	blue	greenyellow
PSMC4	-0.202803	3.29071	0.00155911	0.0774204	-0.221264	3.4738	0.000879032	0.0111246	-0.246315	3.99684	0.000155278	0.00473753	-0.0239304	0.388156	0.699063	0.999975	0.0365086	-0.589187	0.557609	0.999994	0.0501588	-0.803609	0.424309	0.99975	blue	greenyellow
UQCRH	-0.159027	2.42179	0.0180044	0.215303	-0.149611	2.20448	0.0307378	0.112561	-0.245452	3.73803	0.000372468	0.00805491	-0.0845581	1.28725	0.202194	0.999975	-0.0562997	0.852734	0.396678	0.999994	0.100835	-1.51621	0.133912	0.99975	blue	tan
C12orf10	-0.258794	3.78044	0.000323446	0.0361375	-0.220687	3.11918	0.00262155	0.0230601	-0.244994	3.57893	0.00062737	0.0110314	-0.0434808	0.634929	0.527518	0.999975	0.00163161	-0.0237052	0.981154	0.999994	0.115384	-1.66423	0.100481	0.99975	blue	greenyellow
PDIA3P1	-0.146148	1.2669	0.209338	0.592924	-0.255708	2.14471	0.0354039	0.123499	-0.244864	2.12267	0.0372746	0.138933	0.0808141	-0.700287	0.48604	0.999975	0.0713484	-0.61514	0.540432	0.999994	-0.000210184	0.00179899	0.99857	0.99975	blue	pink
TXN2	-0.154526	2.3246	0.0229622	0.240457	-0.162733	2.36864	0.0205821	0.087116	-0.24389	3.66904	0.000467708	0.00924303	-0.0378878	0.569756	0.570644	0.999975	0.00202197	-0.0302527	0.975951	0.999994	0.113617	-1.68761	0.0958807	0.99975	blue	tan
HMGB1P5	-0.242436	2.62399	0.0106347	0.174493	-0.18757	1.9643	0.0534164	0.160681	-0.242459	2.6243	0.0106259	0.0636913	0.0368221	-0.398397	0.691535	0.999975	-0.03166	0.340815	0.734251	0.999994	-0.00227872	0.0243522	0.98064	0.99975	blue	greenyellow
EIF2B2	-0.188455	2.15508	0.0345532	0.291089	-0.302347	3.34534	0.00131665	0.0146554	-0.242323	2.77116	0.007128	0.0496219	0.0160367	-0.18332	0.85507	0.999975	0.0683685	-0.777595	0.439395	0.999994	0.105173	-1.18752	0.238984	0.99975	blue	greenyellow
ATP6V0D1	-0.239609	3.02492	0.00346254	0.108125	-0.198579	2.42561	0.0178308	0.0794456	-0.242083	3.05622	0.00315883	0.029932	0.0121491	-0.153319	0.878582	0.999975	0.00892986	-0.112123	0.911042	0.999994	0.0681386	-0.849346	0.398548	0.99975	blue	greenyellow
RBMX2	-0.235429	2.46326	0.0161975	0.206842	-0.151954	1.5383	0.128428	0.284748	-0.242043	2.53253	0.01354	0.0740068	-0.0146585	0.153314	0.878586	0.999975	-0.00536767	0.0558571	0.955613	0.999994	0.11029	-1.13938	0.258379	0.99975	blue	magenta
RPL29	-0.162216	2.10075	0.0392204	0.303534	-0.118025	1.47888	0.143603	0.306095	-0.242041	3.13458	0.0025038	0.0259943	-0.00819763	0.106123	0.915784	0.999975	-0.0115881	0.149257	0.881775	0.999994	0.0417262	-0.533544	0.595326	0.99975	blue	magenta
ECH1	-0.219086	2.83196	0.00601766	0.139014	-0.15092	1.88754	0.0631814	0.178308	-0.241536	3.12223	0.00259789	0.026516	0.0301468	-0.389542	0.698043	0.999975	-0.00110738	0.0142367	0.988681	0.999994	0.0205097	-0.261766	0.794261	0.99975	blue	brown
PHB2	-0.10584	1.69083	0.095262	0.433388	-0.17239	2.66463	0.00953574	0.05329	-0.240456	3.84144	0.000263603	0.00662812	0.0454009	-0.725025	0.470823	0.999975	0.0627079	-0.996348	0.32247	0.999994	0.100962	-1.59252	0.115717	0.99975	blue	greenyellow
PRMT1	-0.178575	2.10511	0.0388262	0.303109	-0.237788	2.7122	0.00838122	0.0490391	-0.239338	2.82148	0.00619684	0.0457995	0.0466535	-0.549769	0.584205	0.999975	0.0539083	-0.632051	0.529386	0.999994	0.0781664	-0.909823	0.365999	0.99975	blue	grey
DAD1	-0.250571	3.20314	0.00203713	0.0877684	-0.191108	2.36375	0.0208352	0.0878054	-0.238805	3.05279	0.00319081	0.0301507	0.0328268	-0.419483	0.676132	0.999975	0.0100535	-0.127822	0.898652	0.999994	0.0521951	-0.658803	0.512156	0.99975	blue	greenyellow
DPCD	-0.164367	1.7996	0.0761781	0.396412	-0.170637	1.80764	0.0749041	0.197963	-0.238613	2.61255	0.0109642	0.0647059	0.0622893	-0.681735	0.497627	0.999975	-0.0516789	0.56275	0.57538	0.999994	-0.0237633	0.256891	0.798007	0.99975	blue	turquoise
LSM2	-0.276409	3.76843	0.00033666	0.0365002	-0.238993	3.15262	0.00237219	0.0216358	-0.238532	3.25211	0.00175509	0.0209772	-0.0270571	0.368749	0.713414	0.999975	-0.0425931	0.57755	0.565398	0.999994	0.0132011	-0.177705	0.859461	0.99975	blue	magenta
SLC25A4	-0.175582	2.32028	0.0232083	0.241684	-0.215723	2.75825	0.00738674	0.0451847	-0.237956	3.14462	0.00242974	0.0254754	0.0124751	-0.164796	0.869574	0.999975	-0.0157319	0.206768	0.836784	0.999994	0.0537833	-0.701761	0.485126	0.99975	blue	grey
POLR2H	-0.114792	1.6324	0.107029	0.452855	-0.186833	2.57068	0.0122507	0.0622572	-0.237659	3.37972	0.00118276	0.0161774	-0.0211604	0.300802	0.764446	0.999975	-0.0688666	0.974016	0.33336	0.999994	0.00845698	-0.118744	0.905814	0.99975	blue	turquoise
PSMA7	-0.175575	2.48977	0.0151297	0.201408	-0.190023	2.60724	0.0111202	0.0581886	-0.237362	3.36604	0.00123441	0.0166155	0.0572674	-0.811794	0.419627	0.999975	0.0662149	-0.933888	0.353531	0.999994	0.0966252	-1.35291	0.180383	0.99975	blue	pink
APEX1	-0.161655	2.58839	0.0116906	0.182448	-0.214136	3.31748	0.00143545	0.0155113	-0.236604	3.78855	0.000314796	0.00739312	-0.0132841	0.212625	0.83223	0.999975	0.038316	-0.610186	0.54369	0.999994	0.083797	-1.3248	0.189491	0.99975	blue	grey
C12orf65	-0.168661	2.27486	0.0259412	0.253451	-0.17864	2.33128	0.0225862	0.0926125	-0.23653	3.19034	0.00211756	0.0234663	-0.0170069	0.229301	0.819295	0.999975	-0.0227654	0.305392	0.760963	0.999994	0.0466152	-0.620795	0.536725	0.99975	blue	greenyellow
UFD1	-0.188284	3.02138	0.00349852	0.108125	-0.182149	2.82811	0.00608301	0.0396272	-0.23593	3.78604	0.000317453	0.00742462	-0.00962762	0.154437	0.877704	0.999975	0.0679342	-1.08423	0.281936	0.999994	0.122427	-1.93977	0.0563864	0.99975	blue	greenyellow
QTRT1	-0.148358	1.48847	0.141062	0.504087	-0.161846	1.57112	0.120608	0.272737	-0.235721	2.36504	0.0207685	0.0958375	0.00462352	-0.0463707	0.963145	0.999975	0.050572	-0.504639	0.615377	0.999994	0.098265	-0.97344	0.333644	0.99975	blue	green
R3HCC1	-0.217279	3.1419	0.00244964	0.0948356	-0.235627	3.29668	0.0015307	0.0161287	-0.235576	3.40657	0.00108723	0.0153674	-0.0642901	0.929309	0.355882	0.999975	0.00827244	-0.118973	0.905633	0.999994	0.0826197	-1.17961	0.242097	0.99975	blue	blue
TSTA3	-0.221804	2.51937	0.0140122	0.196421	-0.21871	2.40364	0.0188503	0.0822023	-0.23539	2.67376	0.00930363	0.058959	-0.00729463	0.0828262	0.934223	0.999975	0.0904353	-1.02165	0.310419	0.999994	0.13692	-1.53558	0.129093	0.99975	blue	greenyellow
RPS4Y1	-0.168086	2.41089	0.0185082	0.218549	-0.155796	2.16211	0.0339856	0.120066	-0.235035	3.37123	0.00121457	0.0164673	0.00993284	-0.142416	0.887155	0.999975	-0.0817655	1.16643	0.247351	0.999994	-0.000848964	0.0120231	0.990441	0.99975	blue	magenta
PSMB7	-0.190907	3.01125	0.00360351	0.109164	-0.20362	3.10758	0.00271364	0.0236664	-0.234894	3.70515	0.000415281	0.00861758	-0.0224578	0.354105	0.724311	0.999975	-0.00853147	0.133841	0.893907	0.999994	0.0761386	-1.1858	0.239661	0.99975	blue	grey
PUF60	-0.121276	1.81959	0.0730427	0.390537	-0.200892	2.91635	0.00473884	0.0338969	-0.234892	3.52436	0.000747968	0.0121316	-0.00503935	0.0755817	0.939965	0.999975	0.0727835	-1.08611	0.281107	0.999994	0.0814029	-1.20593	0.231854	0.99975	blue	tan
ELOVL1	-0.201188	1.90767	0.0604848	0.362673	-0.414506	3.80284	0.000300096	0.00540202	-0.234195	2.22069	0.0295683	0.12024	0.0502022	-0.475844	0.635649	0.999975	0.144042	-1.35841	0.178642	0.999994	0.228051	-2.13507	0.036212	0.99975	blue	greenyellow
CCDC124	-0.14114	1.46334	0.147793	0.51356	-0.10167	1.01992	0.311233	0.508207	-0.234002	2.42621	0.0178034	0.0873303	0.043677	-0.452681	0.652161	0.999975	0.0819961	-0.845537	0.400656	0.999994	0.0461624	-0.472572	0.63797	0.99975	blue	grey
TWF2	-0.184832	2.84774	0.00575664	0.136875	-0.170868	2.5472	0.0130302	0.06478	-0.233304	3.59466	0.000596195	0.0106514	0.0218894	-0.337131	0.737014	0.999975	0.0139853	-0.214307	0.830923	0.999994	-0.0203327	0.309315	0.757989	0.99975	blue	turquoise
THOC6	-0.202931	2.76654	0.00721962	0.15057	-0.256151	3.37879	0.00118619	0.0135795	-0.232214	3.16583	0.00227991	0.0243723	0.0505213	-0.6885	0.493385	0.999975	0.0254865	-0.345574	0.730686	0.999994	0.0133999	-0.180373	0.857374	0.99975	blue	turquoise
ILVBL	-0.305919	3.63214	0.000527751	0.0442396	-0.344472	3.9572	0.000177915	0.0037285	-0.230785	2.74015	0.00776407	0.0525798	0.121931	-1.44714	0.152265	0.999975	0.0924439	-1.09163	0.278691	0.999994	0.107277	-1.2576	0.212662	0.99975	blue	brown
BRK1	-0.211747	3.79031	0.000312952	0.0355652	-0.219102	3.79474	0.000308347	0.00549026	-0.230614	4.12814	9.84307e-05	0.00361496	0.0171837	-0.307479	0.759381	0.999975	-0.00415152	0.0739106	0.94129	0.999994	0.0620035	-1.09586	0.276848	0.99975	blue	greenyellow
GSS	-0.0912624	1.19893	0.234545	0.620637	-0.216252	2.74878	0.00758189	0.0457743	-0.229285	3.01224	0.00359311	0.0324665	0.059218	-0.777676	0.439347	0.999975	0.0680266	-0.888841	0.377094	0.999994	0.0964332	-1.25087	0.215095	0.99975	blue	black
RACK1	-0.246903	2.9983	0.00374196	0.112155	-0.16233	1.90732	0.0605301	0.173457	-0.228803	2.77856	0.00698343	0.0490462	0.0386745	-0.469476	0.64017	0.999975	-0.0506527	0.611775	0.542643	0.999994	0.0154147	-0.184827	0.853893	0.99975	blue	grey
EXOSC7	-0.167053	2.36915	0.0205562	0.229604	-0.254255	3.48886	0.000837869	0.0107507	-0.228315	3.23804	0.00183216	0.0215295	0.109731	-1.55563	0.124249	0.999975	0.0352621	-0.497378	0.620462	0.999994	0.0511808	-0.71668	0.475926	0.99975	blue	grey
AHCY	-0.137879	1.87832	0.0644494	0.37136	-0.179977	2.37227	0.0203963	0.0866678	-0.227952	3.10545	0.00273093	0.0274759	0.038542	-0.524862	0.601316	0.999975	0.0960006	-1.30073	0.197564	0.999994	0.0376979	-0.507071	0.613679	0.99975	blue	black
EIF3I	-0.126257	1.79571	0.0768019	0.397338	-0.192392	2.64755	0.00998426	0.0547217	-0.227796	3.23994	0.00182156	0.021472	0.0293382	-0.417114	0.677855	0.999975	0.0411122	-0.581557	0.56271	0.999994	0.122182	-1.7158	0.0905652	0.99975	blue	pink
NSUN5	-0.223899	3.15874	0.002329	0.0926202	-0.231762	3.1636	0.00229523	0.0211379	-0.226165	3.19078	0.00211471	0.0234663	-0.0250431	0.353177	0.725004	0.999975	0.0410924	-0.576588	0.566044	0.999994	-0.0075194	0.104743	0.916875	0.99975	blue	grey
HSPBP1	-0.214708	2.588	0.0117028	0.182453	-0.163065	1.90176	0.0612665	0.174857	-0.225692	2.72046	0.00819425	0.0541793	-0.0455969	0.549404	0.584454	0.999975	0.00601807	-0.0721465	0.942688	0.999994	-0.0104112	0.123908	0.901739	0.99975	blue	green
GCAT	-0.259934	2.4501	0.0167525	0.208882	-0.221281	2.0181	0.0473664	0.148611	-0.225204	2.12279	0.0372646	0.138933	0.101721	-0.958459	0.341089	0.999975	0.241044	-2.25973	0.0269122	0.999994	0.179474	-1.67034	0.0992625	0.99975	blue	black
ERGIC3	-0.205544	2.7646	0.0072585	0.15069	-0.246643	3.20977	0.00199663	0.0192605	-0.224954	3.02575	0.00345417	0.0316039	-0.0287949	0.387155	0.699801	0.999975	0.000852482	-0.0114039	0.990933	0.999994	0.0376611	-0.500152	0.618517	0.99975	blue	tan
UBA52	-0.233696	2.52132	0.0139414	0.196071	-0.100549	1.04962	0.297458	0.49381	-0.224829	2.42572	0.0178257	0.0873893	0.000194052	-0.00209284	0.998336	0.999975	-0.0500745	0.537322	0.592728	0.999994	0.00806377	-0.0859006	0.931788	0.99975	blue	magenta
JAGN1	-0.214561	3.18151	0.00217475	0.0897425	-0.31452	4.51241	2.48448e-05	0.000869209	-0.224807	3.33353	0.00136584	0.0178317	-0.074334	1.10182	0.274265	0.999975	-0.0426602	0.629141	0.531279	0.999994	0.00429015	-0.0628112	0.950094	0.99975	blue	tan
ATP5MC2	-0.125522	1.69565	0.0943401	0.43163	-0.0228906	0.299192	0.765669	0.870396	-0.22467	3.03509	0.00336095	0.0310649	0.0212183	-0.286529	0.775308	0.999975	-0.0347434	0.4668	0.642074	0.999994	0.0192584	-0.256873	0.798021	0.99975	blue	magenta
TMEM161A	-0.205453	2.08442	0.0407256	0.308391	-0.0676058	0.663641	0.509072	0.690366	-0.224453	2.27723	0.0257917	0.11048	0.148537	-1.50642	0.136401	0.999975	0.0941217	-0.949737	0.345472	0.999994	0.0771182	-0.772521	0.442373	0.99975	blue	black
NSMCE1	-0.206167	2.11959	0.037543	0.298879	-0.18548	1.84504	0.0692081	0.188688	-0.224405	2.30715	0.0239707	0.105236	0.0355393	-0.365244	0.716017	0.999975	-0.0100638	0.102904	0.918329	0.999994	-0.0402888	0.408976	0.68379	0.99975	blue	turquoise
NME1	-0.0681263	0.754655	0.452956	0.790722	-0.145496	1.55942	0.12335	0.277419	-0.222676	2.46671	0.016055	0.0822782	0.0255381	-0.28279	0.778162	0.999975	0.0185858	-0.204766	0.838342	0.999994	0.162043	-1.77234	0.0806347	0.99975	blue	greenyellow
AC007318.1	-0.164059	1.71672	0.0903968	0.422469	-0.249574	2.52682	0.013743	0.0670333	-0.222312	2.32633	0.0228642	0.101938	0.0438288	-0.458457	0.648027	0.999975	-0.0728421	0.758092	0.450908	0.999994	-0.0159457	0.164749	0.869611	0.99975	blue	grey
CIAPIN1	-0.113969	2.00038	0.0492897	0.331068	-0.244105	4.14554	9.26092e-05	0.00232007	-0.221128	3.88134	0.000230363	0.00610443	0.0117003	-0.205288	0.837935	0.999975	0.0260036	-0.453943	0.651256	0.999994	0.117878	-2.04287	0.0447842	0.99975	blue	greenyellow
YIF1A	-0.355801	4.1615	8.75585e-05	0.0174726	-0.28636	3.24065	0.0018176	0.0180296	-0.220675	2.5811	0.0119182	0.0680211	0.0750907	-0.877951	0.382936	0.999975	0.141661	-1.64791	0.103796	0.999994	0.205699	-2.37551	0.0202316	0.99975	blue	pink
TMEM147	-0.269194	3.93901	0.000189332	0.0283713	-0.187993	2.66159	0.00961424	0.0535166	-0.220347	3.22433	0.00191027	0.02214	0.0131121	-0.191794	0.848452	0.999975	-0.00175651	0.0255631	0.979678	0.999994	0.0863642	-1.24778	0.216218	0.99975	blue	tan
EBNA1BP2	-0.185164	2.7745	0.00706246	0.149866	-0.230932	3.34804	0.00130563	0.0145903	-0.220289	3.30089	0.00151094	0.0190646	-0.0293435	0.439523	0.661619	0.999975	-0.0308292	0.459444	0.647321	0.999994	0.0543934	-0.804741	0.423659	0.99975	blue	greenyellow
TIMM22	-0.156602	2.70083	0.00864509	0.159188	-0.231544	3.86376	0.000244479	0.0046462	-0.220227	3.79823	0.000304771	0.00726857	-0.030927	0.533185	0.595573	0.999975	0.0210235	-0.360617	0.719458	0.999994	0.075912	-1.29268	0.200319	0.99975	blue	pink
PFDN1	-0.138339	1.75059	0.0843417	0.411929	-0.145011	1.7755	0.0801075	0.20703	-0.220119	2.78553	0.00684974	0.0484492	0.00751679	-0.0950855	0.924515	0.999975	0.0855393	-1.07658	0.285316	0.999994	0.154449	-1.92978	0.0576355	0.99975	blue	greenyellow
TMEM219	-0.206154	3.07753	0.00296646	0.102096	-0.187629	2.71011	0.00842916	0.0491375	-0.220115	3.28602	0.0015818	0.0196332	0.0423049	-0.631308	0.529869	0.999975	-0.0181667	0.269729	0.788152	0.999994	0.0569207	-0.838999	0.40429	0.99975	blue	tan
DDX49	-0.0926097	1.02376	0.309428	0.691873	-0.0538834	0.576335	0.566214	0.736326	-0.217375	2.40305	0.0188781	0.0908342	0.0177549	-0.196201	0.845014	0.999975	0.0837599	-0.920917	0.360217	0.999994	0.0639156	-0.697639	0.487685	0.99975	blue	grey
PEBP1	-0.0878178	1.60538	0.112856	0.463269	-0.143964	2.5464	0.0130577	0.0648975	-0.217286	3.97227	0.00016896	0.00494777	-0.0103551	0.18923	0.850453	0.999975	-0.0334975	0.609045	0.544441	0.999994	0.0615684	-1.11131	0.27019	0.99975	blue	greenyellow
NDUFB9	-0.195988	3.07503	0.0029884	0.102291	-0.174709	2.65225	0.00985897	0.0543431	-0.21703	3.40527	0.00109168	0.0153789	-0.0314562	0.493366	0.623279	0.999975	-0.0032207	0.0502589	0.960057	0.999994	0.111222	-1.72303	0.0892415	0.99975	blue	tan
SNU13	-0.0656838	1.16053	0.249727	0.638668	-0.108405	1.85321	0.0680134	0.186777	-0.21698	3.83379	0.000270479	0.00671556	-0.0428112	0.756131	0.452076	0.999975	-0.0548088	0.96314	0.338751	0.999994	0.00155339	-0.0270994	0.978457	0.99975	blue	magenta
LMAN2	-0.206294	2.91557	0.00474942	0.124698	-0.181814	2.48624	0.0152679	0.0720947	-0.216841	3.06471	0.0030808	0.0294113	0.0711256	-1.00486	0.318382	0.999975	0.0958943	-1.34795	0.181967	0.999994	0.0918749	-1.28208	0.20399	0.99975	blue	greenyellow
ZFAND2B	-0.134814	1.92225	0.0585932	0.357431	-0.217968	3.00708	0.00364754	0.0283971	-0.216596	3.08841	0.00287246	0.0281478	-0.0276913	0.394692	0.694255	0.999975	-0.0804789	1.14129	0.257588	0.999994	-0.0294757	0.414973	0.679415	0.99975	blue	grey
DRG2	-0.0994952	1.32318	0.190028	0.568808	-0.0760418	0.978467	0.33117	0.52813	-0.215493	2.86589	0.00546944	0.0421333	-0.011166	0.148441	0.882416	0.999975	0.0239875	-0.31728	0.751964	0.999994	-0.0434297	0.570275	0.570294	0.99975	blue	turquoise
MAEA	-0.121199	1.84747	0.0688505	0.380871	-0.2431	3.58542	0.000614332	0.00873424	-0.214654	3.2721	0.00165087	0.0201109	-0.00464378	0.0707604	0.943788	0.999975	0.110466	-1.67475	0.0983894	0.999994	0.0985595	-1.4834	0.142401	0.99975	blue	black
NPRL2	-0.154451	2.16269	0.0339396	0.288504	-0.212272	2.8759	0.00531676	0.0364046	-0.214556	3.00439	0.00367623	0.0329557	-0.0398991	0.558481	0.578276	0.999975	-0.0441841	0.615335	0.540304	0.999994	0.00109856	-0.0151883	0.987925	0.99975	blue	grey
MEA1	-0.225003	3.72853	0.000384394	0.0392105	-0.255775	4.10095	0.000108244	0.00262448	-0.214532	3.5551	0.000677574	0.0114874	-0.0107983	0.178873	0.858548	0.999975	0.00124561	-0.0205292	0.983679	0.999994	0.0742608	-1.21504	0.228383	0.99975	blue	greenyellow
CHCHD6	-0.175357	1.93914	0.0564646	0.351732	-0.189655	2.02922	0.0461913	0.146275	-0.214407	2.37103	0.0204597	0.0950205	0.0309423	-0.342043	0.73333	0.999975	0.023551	-0.259022	0.796369	0.999994	0.0501149	-0.547186	0.58597	0.99975	blue	blue
ENO1	-0.191732	1.87454	0.0649755	0.372412	-0.191565	1.81215	0.0741974	0.196648	-0.213287	2.08533	0.0406403	0.147043	0.100899	-0.986116	0.32743	0.999975	-0.0618461	0.601388	0.5495	0.999994	-0.108037	1.04293	0.300526	0.99975	blue	turquoise
TMEM138	-0.169849	1.85508	0.067742	0.378823	-0.119348	1.26123	0.211359	0.3951	-0.2125	2.32098	0.0231683	0.102767	0.0395689	-0.432013	0.667043	0.999975	0.119923	-1.30271	0.196891	0.999994	0.0757491	-0.816883	0.416732	0.99975	blue	grey
LMBR1L	-0.175219	1.78993	0.0777348	0.398874	-0.292155	2.88767	0.00514226	0.0355601	-0.212487	2.1707	0.0333042	0.129175	-0.071214	0.727214	0.469489	0.999975	-0.113254	1.15068	0.253732	0.999994	-0.0957156	0.965429	0.337612	0.99975	blue	blue
AKR1B1	-0.149995	2.27582	0.0258805	0.253187	-0.148377	2.17823	0.032716	0.117078	-0.211875	3.21477	0.00196654	0.02253	-0.0417802	0.633684	0.528326	0.999975	-0.0609942	0.920429	0.36047	0.999994	0.0580456	-0.869582	0.387463	0.99975	blue	turquoise
VPS25	-0.086408	1.26425	0.210281	0.59406	-0.139161	1.97003	0.0527416	0.159335	-0.211171	3.08975	0.00286115	0.0281183	-0.011413	0.166924	0.867905	0.999975	0.0505941	-0.736241	0.464013	0.999994	0.0989478	-1.42944	0.15727	0.99975	blue	tan
URM1	-0.079738	1.191	0.237626	0.623403	-0.109076	1.57635	0.119396	0.270684	-0.211068	3.15268	0.00237175	0.0250068	-0.0163681	0.244391	0.807634	0.999975	0.0278024	-0.413019	0.680839	0.999994	0.0668174	-0.98541	0.327774	0.99975	blue	greenyellow
THYN1	-0.108317	1.5934	0.11552	0.4667	-0.171545	2.44166	0.0171173	0.0774192	-0.210733	3.10008	0.00277483	0.0276065	-0.0460443	0.677089	0.500553	0.999975	-0.0779927	1.1411	0.257668	0.999994	-0.0176066	0.255732	0.798898	0.99975	blue	brown
ECSIT	-0.191032	2.47689	0.0156403	0.2053	-0.132592	1.66339	0.100649	0.24082	-0.210226	2.72583	0.00807492	0.053882	-0.0760564	0.985775	0.327596	0.999975	-0.0574757	0.741184	0.46103	0.999994	0.0435366	-0.557361	0.579036	0.99975	blue	brown
CZIB	-0.0147325	0.206085	0.837315	0.956851	-0.07469	1.0109	0.315501	0.512901	-0.210078	2.93873	0.00444465	0.0370558	0.0192827	-0.269636	0.788224	0.999975	-0.00985049	0.137047	0.891382	0.999994	0.0541897	-0.748457	0.45666	0.99975	blue	turquoise
IVD	-0.0636613	0.665628	0.507809	0.82281	-0.108353	1.09616	0.276718	0.471693	-0.209972	2.19548	0.0314038	0.124874	-0.0308406	0.322345	0.74814	0.999975	0.0163789	-0.170327	0.865238	0.999994	0.0451008	-0.46561	0.642922	0.99975	blue	black
RPL14	-0.156136	2.05136	0.0439281	0.317742	-0.0322477	0.409935	0.68309	0.820512	-0.209466	2.75209	0.00751326	0.0514937	-0.060825	0.798844	0.427049	0.999975	-0.112705	1.47273	0.145249	0.999994	-0.0677515	0.878898	0.382426	0.99975	blue	magenta
JPT1	-0.143132	1.44054	0.154117	0.520166	-0.161482	1.57249	0.12029	0.272305	-0.209286	2.10639	0.0387115	0.142555	-0.0337338	0.339386	0.735322	0.999975	-0.0987712	0.988688	0.326178	0.999994	-0.00353259	0.0351044	0.972095	0.99975	blue	blue
TIMM50	-0.159255	2.58571	0.0117738	0.182453	-0.15843	2.48887	0.0151649	0.0717208	-0.209033	3.394	0.00113099	0.0156847	0.0187486	-0.304296	0.761793	0.999975	0.0547576	-0.884244	0.379553	0.999994	0.082357	-1.32029	0.190986	0.99975	blue	greenyellow
SLC25A5	-0.136427	1.88711	0.0632401	0.367988	-0.145189	1.94316	0.0559682	0.165194	-0.209002	2.89105	0.00509303	0.0403961	0.0203538	-0.281438	0.779194	0.999975	0.0246483	-0.339098	0.735538	0.999994	0.139232	-1.90159	0.0612891	0.99975	blue	black
DDX56	-0.154354	2.44547	0.0169518	0.209409	-0.223062	3.41937	0.00104432	0.0124619	-0.208206	3.29873	0.00152105	0.0191636	0.0237044	-0.375417	0.708471	0.999975	0.104766	-1.65084	0.103194	0.999994	0.11133	-1.74155	0.085924	0.99975	blue	greenyellow
PSMC3	-0.151944	2.15632	0.0344523	0.291089	-0.184197	2.52924	0.0136566	0.0668434	-0.208205	2.95483	0.00424353	0.036046	-0.00130116	0.0184588	0.985325	0.999975	0.0491436	-0.693648	0.490169	0.999994	0.0903476	-1.26599	0.209663	0.99975	blue	greenyellow
B4GALT7	-0.091001	1.09311	0.278044	0.666213	-0.139794	1.62474	0.108655	0.253529	-0.207853	2.49682	0.0148566	0.0783347	0.0727523	-0.873589	0.385291	0.999975	0.130987	-1.56491	0.122056	0.999994	0.0481692	-0.571307	0.569598	0.99975	blue	grey
TRUB2	-0.00809458	0.124872	0.900979	0.97436	-0.106055	1.58299	0.117874	0.268543	-0.207794	3.20562	0.00202187	0.0229158	-0.0755677	1.16532	0.247794	0.999975	0.0213238	-0.327171	0.744503	0.999994	0.0134406	-0.204725	0.838374	0.99975	blue	tan
COPE	-0.168957	2.31339	0.0236058	0.243137	-0.129536	1.71609	0.0905132	0.223844	-0.207706	2.84402	0.00581733	0.0439753	0.0556006	-0.761014	0.449172	0.999975	0.0550368	-0.749491	0.456041	0.999994	0.105469	-1.42587	0.158294	0.99975	blue	greenyellow
DDX39A	-0.197581	2.33166	0.022565	0.239909	-0.209297	2.38979	0.0195196	0.0839961	-0.207617	2.45015	0.0167502	0.0841387	0.05893	-0.69518	0.489215	0.999975	-0.00484971	0.0569216	0.954768	0.999994	0.0933924	-1.08821	0.280188	0.99975	blue	turquoise
WDR25	-0.204905	2.81577	0.00629663	0.14122	-0.149714	1.99061	0.0503801	0.154721	-0.207408	2.85023	0.00571645	0.0433483	-0.00639637	0.0878657	0.930231	0.999975	-0.0678047	0.926713	0.357219	0.999994	0.0940129	-1.2756	0.206262	0.99975	blue	grey
YIPF2	-0.211717	2.68859	0.00893729	0.162029	-0.292198	3.59025	0.000604792	0.00865675	-0.207375	2.63352	0.0103671	0.0627208	0.0229857	-0.291789	0.7713	0.999975	0.038087	-0.481048	0.631964	0.999994	0.0966958	-1.21244	0.22937	0.99975	blue	turquoise
PSMD7	-0.153283	2.52214	0.0139119	0.196049	-0.219665	3.49714	0.000816037	0.0105561	-0.207281	3.41072	0.00107315	0.0152318	0.0483352	-0.795023	0.429254	0.999975	0.0172716	-0.282651	0.778268	0.999994	0.0388185	-0.630661	0.53029	0.99975	blue	grey
PKIG	-0.140672	2.44102	0.0171452	0.211141	-0.221715	3.72253	0.000392108	0.00652216	-0.207217	3.59584	0.000593921	0.0106324	-0.0288637	0.500677	0.618149	0.999975	-0.0239767	0.413804	0.680267	0.999994	0.1149	-1.96864	0.0529042	0.99975	blue	turquoise
COMMD4	-0.168042	1.91646	0.0593381	0.359361	-0.114967	1.26863	0.208723	0.392265	-0.207025	2.36111	0.0209729	0.0964777	0.0408872	-0.466135	0.642548	0.999975	0.0234741	-0.266264	0.790808	0.999994	0.0425342	-0.478964	0.633438	0.99975	blue	turquoise
RABEPK	-0.148569	1.90619	0.0606792	0.363114	-0.279951	3.47534	0.000874729	0.0110867	-0.206259	2.64643	0.0100144	0.0615068	0.0883934	-1.1337	0.260738	0.999975	0.112418	-1.43455	0.155811	0.999994	0.0774814	-0.98156	0.329655	0.99975	blue	grey
CNPY3	-0.0807994	1.29184	0.20061	0.582363	-0.098159	1.51847	0.133342	0.291704	-0.205784	3.29019	0.00156161	0.0194862	0.0393963	-0.629646	0.53095	0.999975	0.0468156	-0.744443	0.459069	0.999994	0.0607282	-0.958674	0.340981	0.99975	blue	greenyellow
ATP5F1A	-0.152614	2.36599	0.0207192	0.230209	-0.236623	3.54937	0.000690188	0.00941073	-0.205295	3.18277	0.00216652	0.0238065	-0.0124397	0.192783	0.84768	0.999975	-0.0043168	0.0665611	0.947118	0.999994	0.0389697	-0.59652	0.552728	0.99975	blue	black
UBXN1	-0.186269	2.3737	0.0203232	0.227903	-0.0694555	0.856387	0.394669	0.590637	-0.204636	2.60783	0.011103	0.0652574	0.0184392	-0.234892	0.814969	0.999975	-0.0434876	0.551179	0.583244	0.999994	-0.0203105	0.255557	0.799033	0.99975	blue	brown
MRPL2	-0.141766	1.89715	0.0618808	0.365224	-0.140905	1.82446	0.0722955	0.193489	-0.204189	2.7326	0.00792657	0.0533468	-0.00540199	0.0722648	0.942595	0.999975	0.0427484	-0.568975	0.571171	0.999994	0.0119303	-0.157639	0.875189	0.99975	blue	tan
CREB3	-0.178028	2.90795	0.00485387	0.125504	-0.254574	4.02337	0.000141703	0.00314767	-0.203847	3.32976	0.00138189	0.0179582	-0.0145771	0.238019	0.812553	0.999975	0.0725952	-1.17937	0.242195	0.999994	0.0961726	-1.55107	0.125337	0.99975	blue	greenyellow
IFT22	-0.15045	2.26355	0.026664	0.256827	-0.1764	2.56789	0.0123409	0.0624756	-0.203534	3.06229	0.00310285	0.0295504	-0.0544986	0.819647	0.415164	0.999975	-0.0310343	0.46439	0.643791	0.999994	0.069342	-1.0301	0.306466	0.99975	blue	green
ORMDL2	-0.32362	4.00748	0.00014969	0.0237747	-0.234095	2.80483	0.00649189	0.0413726	-0.202986	2.5137	0.0142205	0.0764429	0.0376064	-0.465522	0.642985	0.999975	0.063508	-0.782181	0.436713	0.999994	0.136784	-1.67246	0.0988423	0.99975	blue	tan
WDR13	-0.248172	2.70845	0.0084674	0.157576	-0.251206	2.65262	0.00984928	0.054325	-0.202251	2.20734	0.0305284	0.122642	0.0145373	-0.158596	0.874438	0.999975	0.0915623	-0.993863	0.32367	0.999994	0.0786456	-0.847468	0.399586	0.99975	blue	green
POLR2I	-0.224016	2.66851	0.00943634	0.164732	-0.0846605	0.975775	0.332494	0.529296	-0.201692	2.40265	0.0188975	0.090855	-0.0535182	0.637285	0.525992	0.999975	-0.00197592	0.02341	0.981389	0.999994	0.0537988	-0.632769	0.52892	0.99975	blue	turquoise
TSEN34	-0.309677	4.67464	1.36518e-05	0.00502533	-0.287536	4.19961	7.65531e-05	0.00201285	-0.201577	3.04292	0.0032847	0.0307122	0.0339081	-0.511663	0.610477	0.999975	0.035776	-0.537122	0.592865	0.999994	0.0564677	-0.841629	0.402826	0.99975	blue	black
INTS11	-0.162014	2.12636	0.0369561	0.29799	-0.109986	1.39668	0.166867	0.33839	-0.201559	2.64543	0.0100413	0.0616024	0.00810488	-0.106334	0.915618	0.999975	0.0640893	-0.836586	0.405637	0.999994	0.0079198	-0.102631	0.918545	0.99975	blue	turquoise
ATG4B	-0.0993278	1.5315	0.130095	0.489061	-0.150807	2.24981	0.0275667	0.105544	-0.201145	3.10146	0.00276345	0.0275905	-0.046788	0.721145	0.473192	0.999975	0.0177895	-0.272805	0.785796	0.999994	0.00201041	-0.0306064	0.975669	0.99975	blue	turquoise
RUVBL2	-0.179918	2.43856	0.0172528	0.211923	-0.124426	1.63174	0.107169	0.251856	-0.201031	2.7248	0.00809776	0.053882	0.0257345	-0.348672	0.728369	0.999975	0.0155417	-0.209508	0.834653	0.999994	0.0281457	-0.376664	0.707548	0.99975	blue	tan
DDOST	-0.0847438	1.50945	0.135629	0.495385	-0.178106	3.06948	0.00303776	0.0253891	-0.199531	3.5541	0.00067976	0.0114874	0.0596194	-1.06154	0.292045	0.999975	0.112094	-1.9858	0.0509238	0.999994	0.0982263	-1.7275	0.0884318	0.99975	blue	pink
BCAS4	-0.184398	1.93899	0.0564835	0.351732	-0.122271	1.244	0.217598	0.401897	-0.197334	2.07506	0.0416113	0.149597	-0.0043612	0.0458423	0.963565	0.999975	-0.0885202	0.925768	0.357707	0.999994	-0.0624464	0.648346	0.518856	0.99975	blue	grey
SEC13	-0.128955	1.85946	0.067111	0.37704	-0.186899	2.60757	0.0111106	0.0581745	-0.196658	2.83579	0.00595338	0.0447243	0.0519443	-0.748738	0.456492	0.999975	0.111672	-1.60154	0.113704	0.999994	0.133613	-1.90231	0.0611929	0.99975	blue	pink
RPUSD2	-0.0835592	1.15675	0.251255	0.639804	-0.143062	1.91623	0.0593676	0.171431	-0.195922	2.71232	0.00837859	0.0550307	-0.0779053	1.07809	0.284648	0.999975	0.0227831	-0.313691	0.754677	0.999994	0.101617	-1.38897	0.169189	0.99975	blue	grey
APEH	-0.170388	2.03118	0.0459875	0.321056	-0.271397	3.13034	0.00253572	0.0226941	-0.195679	2.33273	0.0225052	0.100868	0.022059	-0.262867	0.793416	0.999975	0.0907813	-1.07633	0.285427	0.999994	0.0691409	-0.813815	0.418476	0.99975	blue	black
TCEA2	-0.200845	2.70593	0.00852568	0.157788	-0.0803368	1.04725	0.298543	0.495126	-0.195621	2.63562	0.0103091	0.062523	0.000511791	-0.00689272	0.99452	0.999975	-0.00557322	0.07468	0.94068	0.999994	-5.50324e-05	0.000732077	0.999418	0.999782	blue	turquoise
COPS6	-0.195195	2.90488	0.00489657	0.125563	-0.201645	2.90352	0.00491557	0.0346093	-0.195042	2.90267	0.00492744	0.0396149	-0.0306463	0.455909	0.649849	0.999975	-0.00239203	0.0354052	0.971856	0.999994	0.107256	-1.57602	0.119474	0.99975	blue	greenyellow
PEF1	-0.168806	2.82918	0.00606467	0.13915	-0.203645	3.30236	0.00150413	0.0159583	-0.194539	3.26055	0.0017104	0.0206137	0.0532069	-0.89142	0.375719	0.999975	0.107505	-1.79202	0.0773966	0.999994	0.129722	-2.14669	0.0352404	0.99975	blue	greenyellow
TBRG4	-0.141081	1.89312	0.062424	0.366174	-0.170054	2.20787	0.0304897	0.11226	-0.194397	2.6086	0.0110801	0.0651681	0.00558612	-0.0749307	0.940481	0.999975	0.0418828	-0.558967	0.577946	0.999994	0.0216845	-0.287302	0.774719	0.99975	blue	black
RBM42	-0.174568	2.29408	0.024752	0.248592	-0.101715	1.29332	0.200098	0.38154	-0.193514	2.54311	0.0131708	0.0726687	0.0484409	-0.63635	0.526598	0.999975	0.0895665	-1.17066	0.245657	0.999994	0.0350633	-0.454964	0.650525	0.99975	blue	turquoise
MCRS1	-0.203111	2.75937	0.00736391	0.151695	-0.177998	2.33976	0.0221169	0.0910984	-0.192948	2.62137	0.0107093	0.0640076	-0.0411615	0.558997	0.577925	0.999975	0.118352	-1.59917	0.11423	0.999994	0.112929	-1.51483	0.13426	0.99975	blue	grey
SLC35C2	-0.261057	3.17571	0.00221313	0.0905192	-0.157455	1.85327	0.068005	0.186777	-0.192844	2.34596	0.021779	0.0987371	0.0637768	-0.775548	0.440595	0.999975	0.108939	-1.31805	0.191731	0.999994	0.142055	-1.70625	0.0923387	0.99975	blue	black
PPP4C	-0.203154	2.65482	0.00979109	0.167467	-0.271012	3.4267	0.00102044	0.012251	-0.192684	2.51806	0.0140602	0.0759186	0.0411073	-0.536996	0.592952	0.999975	0.0737749	-0.958874	0.340881	0.999994	0.123506	-1.59361	0.115472	0.99975	blue	greenyellow
ARFIP2	-0.0734938	1.28618	0.202565	0.584424	-0.165239	2.79795	0.00661739	0.0418887	-0.192601	3.37069	0.00121659	0.0164673	-0.0168778	0.295262	0.768657	0.999975	0.0243408	-0.42367	0.673089	0.999994	0.00640441	-0.110665	0.912194	0.99975	blue	black
ZDHHC16	-0.25774	3.58004	0.000625133	0.0483351	-0.217337	2.9209	0.00467758	0.0336482	-0.192515	2.67412	0.00929451	0.0589453	0.000213339	-0.00296222	0.997645	0.999975	0.0745679	-1.03015	0.306443	0.999994	0.147629	-2.02469	0.0466665	0.99975	blue	greenyellow
CDK2AP2	-0.198226	2.05653	0.0434131	0.315229	0.00359662	-0.0361032	0.971302	0.986152	-0.192358	1.99569	0.0498101	0.167189	0.0877555	-0.910101	0.365853	0.999975	0.0564129	-0.582095	0.562349	0.999994	0.0853258	-0.874049	0.385043	0.99975	blue	pink
TMEM222	-0.233612	3.70743	0.000412168	0.039851	-0.186515	2.86398	0.00549909	0.0372464	-0.191438	3.03821	0.00333037	0.0309254	-0.0101557	0.161113	0.872463	0.999975	0.0560965	-0.885433	0.378916	0.999994	0.0703616	-1.10254	0.273954	0.99975	blue	greenyellow
MED19	-0.123378	1.79026	0.0776816	0.398874	-0.151078	2.12109	0.037412	0.127493	-0.191219	2.77474	0.00705781	0.0494016	-0.124483	1.80564	0.0752205	0.999975	-0.0947504	1.36742	0.175812	0.999994	0.0331592	-0.475079	0.636191	0.99975	blue	magenta
SPG7	-0.0845304	1.00425	0.318672	0.700462	-0.116771	1.34228	0.183786	0.360524	-0.190808	2.26693	0.0264462	0.112065	0.0375995	-0.446533	0.656573	0.999975	0.0816358	-0.964613	0.338018	0.999994	-0.00251478	0.0294994	0.976549	0.99975	blue	turquoise
MAD2L2	-0.134793	1.83707	0.0703911	0.385863	-0.132679	1.7496	0.0845149	0.214495	-0.19024	2.59281	0.0115546	0.0669132	-0.0183776	0.250374	0.803022	0.999975	-0.0407876	0.552878	0.582086	0.999994	-0.0328104	0.441522	0.660179	0.99975	blue	grey
PMPCA	-0.0804018	1.11675	0.267871	0.656515	-0.185027	2.48658	0.0152548	0.0720728	-0.190131	2.64091	0.010164	0.0619181	0.0116857	-0.162251	0.87157	0.999975	0.0956093	-1.32078	0.190821	0.999994	0.0617511	-0.84687	0.399917	0.99975	blue	black
ZNF428	-0.0812465	0.874074	0.385029	0.7475	-0.0657264	0.684165	0.496102	0.679066	-0.189853	2.04254	0.0448178	0.156733	-0.0621054	0.667904	0.506363	0.999975	-0.025888	0.277002	0.782584	0.999994	0.0695721	-0.739027	0.462331	0.99975	blue	blue
MRPL4	-0.165171	2.12996	0.0366468	0.297193	-0.109996	1.37244	0.174252	0.348449	-0.189249	2.44053	0.0171667	0.0853195	0.0626953	-0.808193	0.421683	0.999975	0.107958	-1.38464	0.170505	0.999994	0.151956	-1.93481	0.0570041	0.99975	blue	black
CCT5	-0.102046	1.55169	0.125189	0.482595	-0.220036	3.23728	0.00183639	0.018174	-0.189196	2.87695	0.00530098	0.0413838	-0.0132479	0.201371	0.840986	0.999975	0.0552409	-0.835432	0.406281	0.999994	0.0729259	-1.09489	0.277269	0.99975	blue	greenyellow
CCS	-0.208415	3.05194	0.00319886	0.105538	-0.153345	2.17268	0.0331486	0.11812	-0.186345	2.72883	0.00800892	0.0537089	0.0362609	-0.530796	0.597219	0.999975	-0.0416636	0.6068	0.545922	0.999994	-0.0459332	0.664134	0.508759	0.99975	blue	grey
OTUB1	-0.170857	2.63192	0.0104117	0.172578	-0.146665	2.18596	0.0321221	0.115605	-0.186171	2.86788	0.00543872	0.0419945	0.00770794	-0.118691	0.905855	0.999975	0.0453451	-0.694723	0.489499	0.999994	0.0860869	-1.30936	0.194641	0.99975	blue	tan
NDUFA8	-0.150163	2.28814	0.0251141	0.249564	-0.138383	2.04023	0.0450534	0.143956	-0.185151	2.82134	0.00619928	0.0457995	-0.0264524	0.402925	0.688216	0.999975	0.0136732	-0.207219	0.836433	0.999994	0.0859798	-1.29359	0.200006	0.99975	blue	tan
SEM1	-0.109314	1.45258	0.150751	0.516212	-0.0753243	0.968452	0.336111	0.533811	-0.184694	2.4543	0.0165734	0.0836583	-0.00865745	0.115	0.90877	0.999975	-0.0748714	0.989517	0.325775	0.999994	0.01685	-0.221078	0.825667	0.99975	blue	magenta
CENPT	-0.158318	1.92906	0.0577266	0.355524	-0.259585	3.06036	0.00312058	0.0258769	-0.184267	2.24529	0.0278692	0.115636	-0.0608549	0.741229	0.461003	0.999975	-0.00409003	0.049566	0.960608	0.999994	-0.0349899	0.420958	0.675059	0.99975	blue	turquoise
CFL1	-0.152424	1.98066	0.0515098	0.337806	-0.0483648	0.608086	0.545074	0.72079	-0.183501	2.38456	0.0197776	0.0931809	0.049526	-0.643327	0.522087	0.999975	0.0696889	-0.900665	0.370816	0.999994	0.0895809	-1.14936	0.254272	0.99975	blue	grey
NCAPH2	-0.192847	2.71354	0.00835066	0.157576	-0.256442	3.49132	0.000831317	0.0107034	-0.183314	2.57947	0.0119697	0.0681744	-0.015339	0.215755	0.829798	0.999975	0.0294071	-0.411544	0.681915	0.999994	0.0653509	-0.907938	0.366987	0.99975	blue	turquoise
MRPL40	-0.14713	2.09105	0.0401084	0.30574	-0.0644692	0.886527	0.378331	0.575277	-0.183183	2.6035	0.0112314	0.0657087	0.0640297	-0.909671	0.366078	0.999975	0.0224851	-0.317833	0.751546	0.999994	0.104272	-1.46323	0.147824	0.99975	blue	grey
DNTTIP1	-0.0463031	0.78132	0.437216	0.781359	-0.122694	2.00318	0.0489817	0.152241	-0.182722	3.08332	0.00291607	0.028427	-0.0232138	0.391567	0.696553	0.999975	0.0266788	-0.447741	0.655705	0.999994	-0.0542724	0.904231	0.368935	0.99975	blue	green
EIF3G	-0.17832	2.50748	0.0144518	0.198726	-0.0873399	1.18831	0.238678	0.428855	-0.182566	2.56726	0.0123616	0.0695412	0.00559237	-0.0786096	0.937565	0.999975	0.0920188	-1.28694	0.202302	0.999994	0.0806214	-1.11936	0.266764	0.99975	blue	black
PLEKHJ1	-0.179578	2.60519	0.0111812	0.180144	-0.198616	2.78791	0.00680478	0.0427235	-0.181717	2.63628	0.0102907	0.0624563	-0.0172643	0.250367	0.803028	0.999975	0.0283124	-0.408512	0.684129	0.999994	0.0675529	-0.967634	0.336516	0.99975	blue	turquoise
AP2M1	-0.182219	2.68788	0.00895462	0.16217	-0.193126	2.75634	0.00742577	0.0452959	-0.181577	2.67847	0.00918577	0.0585407	0.0069854	-0.103002	0.918252	0.999975	0.0438322	-0.643057	0.522262	0.999994	0.0502353	-0.731653	0.466792	0.99975	blue	pink
CCDC12	-0.0228622	0.281208	0.77937	0.939191	-0.0436778	0.519815	0.604811	0.765703	-0.181282	2.22986	0.0289251	0.118622	0.0245667	-0.302063	0.763488	0.999975	0.0630338	-0.771127	0.443194	0.999994	0.167686	-2.03652	0.0454344	0.99975	blue	tan
CLPP	-0.245075	3.59453	0.000596455	0.0474123	-0.150176	2.13119	0.0365416	0.125815	-0.181217	2.65798	0.00970808	0.0605031	0.00341627	-0.0500884	0.960193	0.999975	-0.0464484	0.677573	0.500248	0.999994	0.0589416	-0.853585	0.39621	0.99975	blue	greenyellow
MRTO4	0.0356622	-0.473738	0.637142	0.885628	-0.0338462	0.435029	0.664863	0.807554	-0.18115	2.40646	0.0187165	0.0902924	0.0769035	-1.02122	0.310624	0.999975	0.139803	-1.84709	0.0689063	0.999994	0.157159	-2.06135	0.0429382	0.99975	blue	greenyellow
SLC35A2	-0.0911599	1.2553	0.213493	0.597496	-0.220431	2.93693	0.00446768	0.0326666	-0.180164	2.48097	0.0154771	0.0804893	-0.0739941	1.01855	0.311881	0.999975	0.0338443	-0.463522	0.64441	0.999994	0.0362039	-0.492243	0.624069	0.99975	blue	turquoise
NUTF2	-0.164615	2.56742	0.0123564	0.185324	-0.150956	2.278	0.0257434	0.10096	-0.178239	2.77997	0.00695623	0.0489567	0.00215832	-0.03365	0.973251	0.999975	-0.034737	0.538842	0.591684	0.999994	0.0196621	-0.302788	0.762938	0.99975	blue	greenyellow
SLC35B1	-0.227156	4.04742	0.000130392	0.0214362	-0.17846	3.0766	0.00297462	0.0251343	-0.176537	3.14557	0.00242284	0.0254662	-0.0159281	0.2837	0.777467	0.999975	0.0179566	-0.318214	0.751258	0.999994	0.09902	-1.74204	0.0858385	0.99975	blue	greenyellow
FAM3A	-0.28046	3.41998	0.00104229	0.063995	-0.293181	3.45912	0.000920987	0.0114923	-0.176013	2.14639	0.035265	0.134159	-0.025559	0.311557	0.756292	0.999975	-0.0123507	0.149792	0.881354	0.999994	0.0581438	-0.700063	0.486179	0.99975	blue	turquoise
AHSA1	-0.0226572	0.338885	0.735698	0.925869	-0.0595675	0.862053	0.391565	0.587798	-0.175496	2.62498	0.0106067	0.063599	-0.039811	0.595239	0.553579	0.999975	0.0195976	-0.291536	0.771493	0.999994	0.0395754	-0.584459	0.560767	0.99975	blue	grey
PEX16	-0.214078	2.55524	0.0127585	0.187993	-0.0819082	0.945942	0.347391	0.544804	-0.175395	2.09357	0.0398761	0.145296	0.0531121	-0.633715	0.528306	0.999975	0.042272	-0.501827	0.617344	0.999994	0.0926821	-1.09229	0.278405	0.99975	blue	grey
UQCRC1	-0.190665	2.69776	0.00871755	0.159583	-0.220246	3.01521	0.00356216	0.0279503	-0.174399	2.46766	0.0160156	0.0822043	0.00899438	-0.127217	0.899129	0.999975	0.0364943	-0.513567	0.609151	0.999994	0.0835271	-1.16692	0.247154	0.99975	blue	black
ADRM1	-0.273151	3.58005	0.0006251	0.0483351	-0.0871069	1.10463	0.273054	0.467694	-0.174217	2.28343	0.0254044	0.109523	0.0419428	-0.549523	0.584373	0.999975	0.0728358	-0.949454	0.345615	0.999994	0.125725	-1.62702	0.10817	0.99975	blue	pink
SGTA	-0.0236246	0.383402	0.702569	0.913647	-0.0514344	0.807647	0.421996	0.616673	-0.172581	2.80088	0.00656375	0.0474163	-0.0166182	0.269597	0.788254	0.999975	0.0332564	-0.536792	0.593092	0.999994	-0.0314513	0.503976	0.615841	0.99975	blue	turquoise
CCT7	-0.1442	2.47321	0.0157892	0.206097	-0.19554	3.24494	0.001794	0.0178588	-0.172568	2.95981	0.00418305	0.0357014	0.00666549	-0.114279	0.90934	0.999975	0.0503987	-0.859714	0.392844	0.999994	0.0849676	-1.43889	0.154581	0.99975	blue	grey
QARS	-0.159761	2.22055	0.0295786	0.270732	-0.241507	3.24787	0.00177802	0.0177623	-0.172548	2.39834	0.0191039	0.0913031	0.0387101	-0.537844	0.592369	0.999975	0.0700173	-0.967916	0.336377	0.999994	0.047346	-0.649763	0.517945	0.99975	blue	green
DMAC2	-0.117884	2.02127	0.0470285	0.324108	-0.16603	2.75443	0.00746492	0.0454362	-0.170887	2.93015	0.00455544	0.0376279	0.0219694	-0.376555	0.707629	0.999975	0.0539536	-0.920091	0.360645	0.999994	0.106308	-1.79976	0.0761532	0.99975	blue	greenyellow
CHID1	-0.182154	2.9451	0.00436405	0.120296	-0.136691	2.13835	0.035936	0.124529	-0.170776	2.7612	0.00732681	0.0505953	0.0271127	-0.438203	0.662571	0.999975	0.0574585	-0.92397	0.358636	0.999994	0.0811613	-1.29566	0.199294	0.99975	blue	grey
TMEM11	-0.120295	1.93802	0.0566036	0.351861	-0.121234	1.88978	0.0628766	0.177863	-0.170098	2.74043	0.00775802	0.0525788	0.0158504	-0.255265	0.799258	0.999975	0.0322157	-0.516202	0.60732	0.999994	0.088302	-1.40463	0.164498	0.99975	blue	greenyellow
LCMT1	-0.16271	3.14606	0.0024193	0.0947555	-0.182703	3.41803	0.00104873	0.0124839	-0.170021	3.28751	0.00157453	0.0196041	-0.0103392	0.19984	0.842178	0.999975	0.0121186	-0.233049	0.816395	0.999994	0.0479124	-0.914708	0.363446	0.99975	blue	grey
CMSS1	-0.109842	1.43859	0.154667	0.520563	-0.0268253	0.339931	0.734913	0.851415	-0.169466	2.21954	0.0296499	0.120456	-0.00950805	0.124481	0.901287	0.999975	-0.0337658	0.439833	0.661396	0.999994	0.0689952	-0.892216	0.375296	0.99975	blue	magenta
MDH2	-0.149276	2.07104	0.0419967	0.311353	-0.0563045	0.755818	0.452262	0.643705	-0.16746	2.32337	0.0230323	0.102477	0.00931212	-0.129148	0.897606	0.999975	0.0209898	-0.289631	0.772944	0.999994	0.0799977	-1.09586	0.276848	0.99975	blue	tan
TUFM	-0.145551	2.18097	0.0325043	0.283202	-0.118931	1.72428	0.0890144	0.221496	-0.166975	2.50207	0.0146562	0.0777246	-0.00988461	0.14806	0.882716	0.999975	0.0289881	-0.432014	0.667042	0.999994	0.057095	-0.844726	0.401105	0.99975	blue	black
IMP4	-0.128515	1.97031	0.0527095	0.34125	-0.127114	1.88559	0.063447	0.178522	-0.165633	2.53943	0.0132981	0.073157	-0.0686621	1.05229	0.296238	0.999975	0.0597273	-0.910737	0.36552	0.999994	0.0493516	-0.747071	0.457491	0.99975	blue	grey
DALRD3	-0.236232	3.37327	0.00120682	0.0679394	-0.143376	1.98092	0.0514803	0.156981	-0.165583	2.3645	0.020796	0.0959246	-0.0386621	0.551875	0.58277	0.999975	-0.0248414	0.352802	0.725284	0.999994	0.0311268	-0.438864	0.662095	0.99975	blue	green
ARFRP1	-0.166162	2.42235	0.0179787	0.21517	-0.19411	2.73798	0.00781029	0.0467982	-0.164498	2.39816	0.0191126	0.0913186	0.0287018	-0.41827	0.677014	0.999975	0.0918661	-1.332	0.187128	0.999994	0.0525001	-0.755696	0.452335	0.99975	blue	green
ARMC6	-0.144494	1.95026	0.0550995	0.347998	-0.148963	1.94535	0.0556987	0.164616	-0.162956	2.1995	0.0311047	0.124162	0.0014851	-0.0200373	0.98407	0.999975	0.123902	-1.66326	0.100675	0.999994	0.152418	-2.03122	0.0459825	0.99975	blue	grey
ATP5F1B	-0.111499	1.41604	0.161144	0.529223	-0.169997	2.08891	0.0403064	0.133825	-0.162793	2.06752	0.0423367	0.151402	-0.0127514	0.161884	0.871858	0.999975	0.0426949	-0.539288	0.591378	0.999994	0.111629	-1.39978	0.165939	0.99975	blue	brown
SAMM50	-0.13039	2.49566	0.014901	0.200095	-0.151113	2.79848	0.00660774	0.0418496	-0.161869	3.09826	0.00278986	0.0276909	0.00287004	-0.0549126	0.956363	0.999975	0.00269893	-0.0513779	0.959169	0.999994	0.0369889	-0.69903	0.48682	0.99975	blue	tan
BCS1L	-0.192432	2.93277	0.0045213	0.121522	-0.160807	2.37129	0.0204462	0.0867275	-0.161663	2.4639	0.0161712	0.0825309	-0.0466568	0.710818	0.479529	0.999975	0.0242111	-0.366994	0.714717	0.999994	0.0994861	-1.49708	0.138811	0.99975	blue	grey
EIF3H	-0.11187	1.95925	0.0540167	0.344636	-0.110194	1.86728	0.0659967	0.18299	-0.158365	2.7736	0.00708006	0.0494378	0.0324437	-0.567998	0.571831	0.999975	-0.00144562	0.0251808	0.979981	0.999994	0.0389029	-0.672726	0.503309	0.99975	blue	grey
PPP5C	-0.0366254	0.571203	0.569668	0.853167	-0.173626	2.62	0.0107488	0.057082	-0.157374	2.45444	0.0165676	0.0836583	-0.030079	0.468935	0.640555	0.999975	0.0634235	-0.983784	0.328567	0.999994	0.0856246	-1.31852	0.191572	0.99975	blue	black
CYBC1	-0.106106	1.94124	0.0562042	0.351054	-0.0858891	1.52039	0.13286	0.290848	-0.157327	2.87843	0.00527882	0.0412809	0.0635347	-1.16196	0.249147	0.999975	0.0400732	-0.729181	0.468293	0.999994	0.0391844	-0.707839	0.481366	0.99975	blue	purple
PSMC5	-0.156284	2.44212	0.0170972	0.210704	-0.135609	2.0503	0.0440339	0.142067	-0.156482	2.44528	0.01696	0.0847148	-0.0244343	0.381675	0.703844	0.999975	0.103252	-1.60469	0.113007	0.999994	0.128442	-1.98172	0.0513891	0.99975	blue	greenyellow
LYPLA2	-0.170641	2.30665	0.0240004	0.244084	-0.11985	1.56751	0.121448	0.274014	-0.156209	2.11161	0.0382454	0.141369	-0.00072161	0.00975081	0.992247	0.999975	0.0521526	-0.701156	0.485501	0.999994	0.102459	-1.3675	0.175788	0.99975	blue	black
MED29	-0.0526453	0.980243	0.330299	0.708777	-0.0905268	1.63091	0.107345	0.252034	-0.153818	2.86412	0.00549686	0.0422699	0.0542596	-1.00993	0.315962	0.999975	0.0797621	-1.47711	0.144075	0.999994	0.0633213	-1.16414	0.24827	0.99975	blue	green
PFKM	-0.0258967	0.352205	0.725729	0.922856	-0.0956618	1.25883	0.21222	0.396062	-0.153616	2.08929	0.0402714	0.146052	-0.019213	0.261209	0.794689	0.999975	-0.0288227	0.389878	0.697796	0.999994	-0.0300594	0.403658	0.687679	0.99975	blue	brown
RUVBL1	-0.0542525	0.793478	0.430147	0.777258	-0.140211	1.98416	0.0511102	0.156218	-0.15302	2.23808	0.0283585	0.117035	-0.00372156	0.0544104	0.956761	0.999975	-0.00221758	0.032258	0.974357	0.999994	-0.0182989	0.264254	0.792351	0.99975	blue	black
RPN1	-0.187043	3.07133	0.00302125	0.102935	-0.22647	3.59812	0.000589549	0.00853234	-0.152861	2.51012	0.0143532	0.076829	0.0597439	-0.980666	0.330092	0.999975	0.0713932	-1.16596	0.247537	0.999994	0.0654141	-1.06057	0.292485	0.99975	blue	pink
KXD1	-0.178369	2.71119	0.00840432	0.157576	-0.1483	2.18102	0.0325005	0.116522	-0.152419	2.31681	0.0234077	0.103453	0.040865	-0.620919	0.536644	0.999975	0.0139684	-0.211169	0.833361	0.999994	-0.0139198	0.208908	0.835119	0.99975	blue	pink
DPM2	-0.167286	2.58521	0.0117895	0.182453	-0.0573654	0.857755	0.393918	0.589762	-0.150933	2.33255	0.0225152	0.100887	0.0209203	-0.32318	0.74751	0.999975	0.0126545	-0.194501	0.84634	0.999994	0.119906	-1.8296	0.0715142	0.99975	blue	greenyellow
PHF23	-0.104954	1.83303	0.070997	0.386317	-0.152525	2.57745	0.0120336	0.0615419	-0.149923	2.61848	0.0107922	0.0642335	0.028932	-0.505115	0.615044	0.999975	0.00220662	-0.0383301	0.969532	0.999994	0.0435066	-0.750253	0.455585	0.99975	blue	grey
MRPS18A	-0.158017	2.45346	0.0166093	0.20833	-0.172866	2.59695	0.0114286	0.0593781	-0.149122	2.3154	0.023489	0.103685	0.0477878	-0.741708	0.460714	0.999975	0.0651429	-1.00597	0.317853	0.999994	0.162628	-2.49316	0.0149977	0.99975	blue	grey
COPS7B	-0.0964531	1.52832	0.130883	0.489706	-0.137435	2.10704	0.0386529	0.130147	-0.148458	2.3524	0.021433	0.0976655	-0.0506123	0.80167	0.425423	0.999975	0.0396585	-0.624994	0.533982	0.999994	-0.0215442	0.337062	0.737066	0.99975	blue	grey
NDUFV1	-0.220497	3.30569	0.00148873	0.075475	-0.141036	2.04582	0.0444847	0.142845	-0.147867	2.21687	0.0298404	0.120856	-0.0480212	0.719671	0.474093	0.999975	0.0123381	-0.183972	0.854561	0.999994	0.023382	-0.346117	0.73028	0.99975	blue	green
IDH3B	-0.0694521	1.31072	0.194182	0.573535	-0.0700407	1.27895	0.205085	0.387925	-0.147792	2.78925	0.00677939	0.0483419	-0.0265699	0.501252	0.617747	0.999975	-0.000795597	0.0149335	0.988127	0.999994	0.0566148	-1.05496	0.295025	0.99975	blue	grey
RNF25	-0.0794958	1.27764	0.205544	0.588018	-0.160999	2.50361	0.0145978	0.0699247	-0.147701	2.37388	0.0203144	0.0945012	-0.0958164	1.53938	0.128164	0.999975	-0.00051991	0.00831063	0.993392	0.999994	0.0679676	-1.07857	0.284437	0.99975	blue	pink
ZDHHC4	-0.195739	2.78603	0.0068404	0.148454	-0.206535	2.84433	0.00581223	0.0384898	-0.146801	2.08953	0.0402496	0.146004	-0.00334089	0.0475348	0.962221	0.999975	0.0236255	-0.334451	0.739027	0.999994	0.0840684	-1.18147	0.241364	0.99975	blue	turquoise
FARSA	-0.169549	2.64091	0.0101639	0.17074	-0.10447	1.57446	0.119834	0.27135	-0.142868	2.22538	0.0292376	0.119354	0.0544951	-0.848512	0.399009	0.999975	0.0686968	-1.06424	0.290833	0.999994	0.0974421	-1.49861	0.138416	0.99975	blue	grey
NOP56	-0.0717401	1.11871	0.267038	0.655993	-0.102013	1.53918	0.128211	0.284347	-0.139634	2.17751	0.0327723	0.128042	-0.0254659	0.396969	0.692583	0.999975	0.0249837	-0.387486	0.699557	0.999994	0.0589711	-0.907983	0.366963	0.99975	blue	grey
GPS1	-0.146177	2.27605	0.0258659	0.253187	-0.125032	1.88366	0.0637129	0.178973	-0.1382	2.1519	0.0348118	0.133076	0.0169562	-0.26392	0.792607	0.999975	0.0547853	-0.848417	0.399061	0.999994	0.064579	-0.992834	0.324168	0.99975	blue	black
ARPC2	-0.162595	2.47487	0.0157219	0.205733	-0.182936	2.69415	0.00880346	0.0504055	-0.138187	2.1034	0.0389804	0.14321	0.0364952	-0.555294	0.580442	0.999975	0.0747394	-1.13145	0.261677	0.999994	0.104929	-1.57697	0.119254	0.99975	blue	pink
ERAL1	-0.108499	1.86438	0.0664088	0.376213	-0.116467	1.93637	0.0568091	0.16686	-0.135035	2.32041	0.0232011	0.102871	-0.0295312	0.507257	0.613548	0.999975	0.0274294	-0.468775	0.640668	0.999994	0.038438	-0.652153	0.516411	0.99975	blue	turquoise
ELOF1	-0.0812966	1.58248	0.117991	0.470926	-0.0592065	1.1151	0.268574	0.463163	-0.132604	2.58127	0.0119131	0.0680211	-0.00386183	0.0751451	0.940311	0.999975	0.0695167	-1.34585	0.182639	0.999994	0.104189	-2.00249	0.0490573	0.99975	blue	black
MLF2	-0.157759	2.97196	0.00403889	0.115985	-0.109433	1.99468	0.0499234	0.15398	-0.128974	2.42975	0.0176439	0.0868752	0.0173015	-0.325817	0.745522	0.999975	0.0455348	-0.853166	0.396441	0.999994	0.0912839	-1.69795	0.0939035	0.99975	blue	greenyellow
YIPF3	-0.10355	2.06511	0.0425706	0.312781	-0.0746694	1.44084	0.154033	0.321211	-0.126336	2.51961	0.0140036	0.0757342	0.000579199	-0.0115468	0.99082	0.999975	0.0343008	-0.680362	0.498491	0.999994	0.0785432	-1.54662	0.126407	0.99975	blue	tan
ALAS1	-0.048009	0.878517	0.382631	0.746017	-0.121492	2.15107	0.0348798	0.122155	-0.124603	2.28016	0.0256081	0.110015	-0.0716974	1.31151	0.193916	0.999975	0.0217181	-0.395268	0.693832	0.999994	0.0533056	-0.963123	0.338759	0.99975	blue	grey
AUP1	-0.164527	2.84043	0.00587622	0.138197	-0.153201	2.5591	0.0126298	0.0634414	-0.121454	2.09687	0.0395737	0.144637	-0.0305578	0.527364	0.599587	0.999975	-0.000631085	0.0108362	0.991385	0.999994	0.0545814	-0.930407	0.355318	0.99975	blue	greenyellow
NSFL1C	-0.126942	2.44511	0.0169674	0.209409	-0.114881	2.14101	0.0357122	0.124069	-0.121314	2.33675	0.0222823	0.100187	-0.0481341	0.926801	0.357174	0.999975	-0.0492591	0.943671	0.348543	0.999994	0.0242896	-0.46195	0.645532	0.99975	blue	magenta
TMUB2	-0.109811	2.16784	0.0335296	0.286206	-0.135792	2.59377	0.0115252	0.0597172	-0.120769	2.38423	0.019794	0.0931809	-0.0377529	0.745028	0.458717	0.999975	-0.0158346	0.310906	0.756785	0.999994	-0.0130485	0.254345	0.799965	0.99975	blue	grey
C11orf49	-0.0901605	1.71494	0.0907241	0.422898	-0.0505119	0.929616	0.355724	0.552258	-0.116634	2.21854	0.0297213	0.120664	0.000121138	-0.00230331	0.998169	0.999975	-0.035627	0.67399	0.50251	0.999994	0.0383667	-0.720558	0.473551	0.99975	blue	green
NRBP1	-0.0721969	1.39824	0.166399	0.538024	-0.168448	3.15652	0.00234459	0.0214832	-0.116332	2.25306	0.0273508	0.114466	0.0279968	-0.542019	0.589505	0.999975	0.0719504	-1.38592	0.170114	0.999994	0.0542676	-1.03773	0.302921	0.99975	blue	tan
SAP30BP	-0.0164141	0.317955	0.751454	0.930961	-0.138031	2.58704	0.0117327	0.0604593	-0.110246	2.1356	0.0361675	0.136428	0.0589887	-1.14224	0.257198	0.999975	0.0762253	-1.46855	0.146378	0.999994	0.0634655	-1.21385	0.228832	0.99975	blue	grey
FAM241B	-0.174974	1.17791	0.242771	0.629531	-0.25618	1.66864	0.0995999	0.238918	-0.295855	1.99172	0.050255	0.168065	-0.099389	0.668834	0.505774	0.999975	-0.167777	1.12334	0.265082	0.999994	0.0437901	-0.291069	0.771848	0.99975	blue	blue
MSRB2	-0.143732	1.90249	0.0611691	0.363821	-0.0390514	0.50013	0.618532	0.77542	-0.149352	1.97693	0.0519392	0.172077	-0.060644	0.802415	0.424995	0.999975	-0.00558095	0.0734715	0.941638	0.999994	0.0150502	-0.196695	0.844629	0.99975	blue	turquoise
MTRNR2L1	-0.470774	2.49026	0.0151103	0.201408	-0.241746	1.23729	0.220063	0.405036	-0.373465	1.97558	0.0520959	0.172461	0.308285	-1.63015	0.107505	0.999975	0.0177359	-0.0933102	0.92592	0.999994	0.350214	-1.82915	0.0715831	0.99975	blue	grey
ACOT8	-0.228452	2.85032	0.00571494	0.136297	-0.144571	1.74525	0.0852743	0.215708	-0.157924	1.97042	0.0526965	0.173565	-0.0481102	0.600036	0.550395	0.999975	0.00107026	-0.013281	0.989441	0.999994	0.0933626	-1.15015	0.253948	0.99975	blue	grey
WDR45	-0.160242	1.7555	0.0834934	0.410501	-0.127633	1.35289	0.180389	0.356213	-0.179131	1.96248	0.0536313	0.17535	0.00859177	-0.0940909	0.925302	0.999975	0.110788	-1.20714	0.231389	0.999994	0.128855	-1.39382	0.167725	0.99975	blue	black
FANCG	-0.130215	1.56214	0.122708	0.477241	-0.20015	2.32323	0.0230402	0.0936934	-0.163168	1.95752	0.0542236	0.176707	0.0114743	-0.137602	0.890945	0.999975	0.0539544	-0.643765	0.521805	0.999994	0.0170074	-0.201455	0.84092	0.99975	blue	turquoise
PTGES3P1	-0.231245	1.84512	0.0691963	0.381662	-0.250805	1.93627	0.0568211	0.166866	-0.242315	1.9335	0.0571683	0.182338	-0.0694342	0.553819	0.581445	0.999975	-0.0881097	0.699227	0.486698	0.999994	-0.159025	1.25285	0.214375	0.99975	blue	magenta
AC112247.1	-0.191204	1.19319	0.236773	0.622848	-0.269032	1.6244	0.108727	0.253592	-0.30891	1.92777	0.0578905	0.183689	0.0179546	-0.112003	0.911138	0.999975	-0.245622	1.52448	0.131839	0.999994	0.0812838	-0.500838	0.618036	0.99975	blue	blue
FSD1	-0.20083	2.2139	0.0300536	0.27224	-0.169511	1.80803	0.0748435	0.197896	-0.174761	1.92657	0.0580418	0.184049	-0.0171315	0.188784	0.850801	0.999975	-0.018649	0.204468	0.838573	0.999994	-0.00814525	0.0886574	0.929604	0.99975	blue	blue
INPP5K	-0.102102	1.59551	0.115046	0.466301	-0.116589	1.76278	0.0822471	0.210445	-0.123234	1.92577	0.0581435	0.184308	-0.050714	0.792196	0.430889	0.999975	-0.0220067	0.342027	0.733342	0.999994	-0.0108348	0.167174	0.867709	0.99975	blue	grey
LSM12P1	-0.353441	3.41971	0.0010432	0.063995	-0.178507	1.67111	0.0991086	0.238156	-0.198828	1.9238	0.0583945	0.18489	0.0469864	-0.45445	0.650894	0.999975	0.0710635	-0.683849	0.496299	0.999994	0.152771	-1.45947	0.148854	0.99975	blue	grey
COQ4	-0.0989785	1.31087	0.194131	0.573535	-0.0592757	0.759582	0.450023	0.641812	-0.145169	1.92267	0.0585388	0.185209	-0.0653746	0.865507	0.38968	0.999975	-0.0160709	0.211691	0.832955	0.999994	0.0233271	-0.305043	0.761227	0.99975	blue	green
SERP2	-0.247976	1.3023	0.197029	0.577199	-0.233402	1.18599	0.239584	0.4298	-0.365207	1.91801	0.0591377	0.186546	0.134188	-0.704458	0.483455	0.999975	0.0335308	-0.17514	0.861469	0.999994	0.210173	-1.08983	0.279478	0.99975	blue	brown
CLCN3P1	-0.198968	2.02088	0.0470696	0.324259	-0.182034	1.7889	0.0779021	0.203282	-0.188519	1.9148	0.0595535	0.187304	0.0254204	-0.258096	0.797081	0.999975	-0.012446	0.125727	0.900304	0.999994	-0.00699265	0.0701262	0.944291	0.99975	blue	brown
TIMM8BP2	-0.299345	1.36754	0.175777	0.549125	-0.466474	2.06192	0.0428825	0.139319	-0.41837	1.91134	0.0600041	0.188192	0.0187781	-0.0857549	0.931903	0.999975	0.0769889	-0.349813	0.727516	0.999994	0.130689	-0.589505	0.557396	0.99975	blue	grey
AC246787.1	-0.0379861	0.218349	0.827784	0.954088	-0.0273631	0.152185	0.879474	0.938087	-0.332103	1.90902	0.0603076	0.188655	-0.1214	0.697569	0.487728	0.999975	-0.278728	1.59349	0.115499	0.999994	-0.141584	0.803569	0.424332	0.99975	blue	magenta
TMEM134	-0.250375	2.9571	0.0042159	0.118388	-0.316976	3.62226	0.000545022	0.00804608	-0.160354	1.89394	0.0623136	0.192934	0.0884914	-1.04476	0.299681	0.999975	0.0296826	-0.348674	0.728367	0.999994	0.0316941	-0.369603	0.71278	0.99975	blue	tan
AC022968.1	-0.0234225	0.198241	0.843424	0.959397	-0.185882	1.52221	0.132405	0.290266	-0.223482	1.89153	0.0626389	0.193517	0.102996	-0.871408	0.386473	0.999975	-0.133886	1.12703	0.263529	0.999994	0.0491112	-0.410414	0.68274	0.99975	blue	tan
DOLPP1	-0.184697	2.71082	0.00841293	0.157576	-0.176265	2.50313	0.0146157	0.0699513	-0.127448	1.87062	0.0655259	0.199237	-0.0263601	0.386749	0.700101	0.999975	0.0355565	-0.51904	0.605349	0.999994	0.0845738	-1.22563	0.224395	0.99975	blue	grey
AP1M1	-0.16075	2.4813	0.0154636	0.20405	-0.112623	1.68203	0.0969625	0.234779	-0.121177	1.87051	0.0655406	0.199239	-0.013882	0.214202	0.831005	0.999975	0.0107971	-0.16576	0.868818	0.999994	0.0330534	-0.503765	0.615988	0.99975	blue	turquoise
MRPS11	0.0316827	-0.453449	0.65161	0.892227	-0.00345225	0.0478063	0.962005	0.981895	-0.130296	1.86487	0.066339	0.2007	-0.0757496	1.08375	0.282149	0.999975	-0.021547	0.306714	0.75996	0.999994	0.0759284	-1.07298	0.286919	0.99975	blue	grey
AC090114.1	-0.300328	1.25983	0.211863	0.595629	-0.354002	1.43681	0.155171	0.322632	-0.443375	1.85993	0.0670433	0.202217	-0.0184783	0.0774851	0.938456	0.999975	-0.214294	0.894061	0.374315	0.999994	-0.111254	0.460799	0.646353	0.99975	blue	grey
DEF8	-0.0985345	1.41088	0.162652	0.531593	-0.0927335	1.28475	0.203063	0.385433	-0.12947	1.85388	0.067916	0.203832	0.0421149	-0.602809	0.548559	0.999975	0.0498233	-0.70954	0.480317	0.999994	0.0873434	-1.23485	0.220963	0.99975	blue	grey
RPL7AP30	-0.390378	1.71904	0.0899707	0.4214	-0.294774	1.25593	0.213263	0.39692	-0.419564	1.84761	0.0688311	0.205522	0.231864	-1.02065	0.310891	0.999975	-0.21715	0.951048	0.344811	0.999994	-0.0480358	0.208856	0.835159	0.99975	blue	brown
TMEM14DP	-0.320932	1.51662	0.133809	0.493074	-0.434021	1.9845	0.0510709	0.156183	-0.389322	1.83985	0.0699762	0.20766	-0.351257	1.65932	0.101469	0.999975	-0.184511	0.867217	0.388749	0.999994	-0.152563	0.711862	0.478886	0.99975	blue	grey
ATP5F1CP1	-0.26437	1.34735	0.182159	0.557907	-0.440563	2.17246	0.0331656	0.118131	-0.360306	1.83632	0.0705023	0.208667	-0.0486982	0.248097	0.804777	0.999975	-0.0179562	0.0910171	0.927736	0.999994	0.113814	-0.57272	0.568646	0.99975	blue	grey
EIF2B3	-0.0958325	1.43091	0.156849	0.52282	-0.190647	2.75427	0.00746816	0.0454396	-0.122477	1.82879	0.0716371	0.211109	0.0248586	-0.371038	0.711716	0.999975	0.0633154	-0.940265	0.350274	0.999994	0.118211	-1.74276	0.0857113	0.99975	blue	pink
SPINT2	-0.34845	1.92016	0.0588607	0.357955	-0.383015	2.04216	0.0448565	0.143637	-0.330857	1.82326	0.0724796	0.212703	-0.0798326	0.439763	0.661447	0.999975	-0.163023	0.893485	0.374621	0.999994	0.108093	-0.588134	0.558312	0.99975	blue	blue
AC022868.1	-0.293135	1.35577	0.179475	0.553617	-0.145928	0.653033	0.515847	0.696281	-0.39248	1.81529	0.0737082	0.215229	0.000389405	-0.00180037	0.998569	0.999975	-0.0299366	0.137709	0.890861	0.999994	-0.105881	0.483526	0.630212	0.99975	blue	grey
HAGH	-0.136879	1.55075	0.125415	0.482759	-0.0595075	0.652306	0.516313	0.696775	-0.159774	1.81016	0.0745083	0.216592	0.0601349	-0.681036	0.498067	0.999975	0.103358	-1.16463	0.248072	0.999994	0.146202	-1.63544	0.106388	0.99975	blue	brown
TUBBP1	-0.32713	1.92848	0.0577998	0.355524	-0.214471	1.22332	0.225259	0.411863	-0.304818	1.79699	0.0765958	0.220241	-0.0764114	0.450293	0.653873	0.999975	-0.0263358	0.154413	0.877723	0.999994	0.0336458	-0.195843	0.845294	0.99975	blue	blue
POR	-0.131288	1.713	0.0910826	0.424026	-0.143982	1.81769	0.0733371	0.195346	-0.137632	1.79583	0.0767824	0.220515	0.0471045	-0.614381	0.54093	0.999975	0.0341999	-0.443813	0.658529	0.999994	0.0203651	-0.262362	0.793803	0.99975	blue	brown
MRPS2	-0.229622	3.11689	0.00263951	0.0973744	-0.0996297	1.30851	0.194928	0.374477	-0.132164	1.79405	0.077069	0.220938	0.0176065	-0.238903	0.81187	0.999975	0.00540987	-0.0730361	0.941983	0.999994	0.0550673	-0.738048	0.462921	0.99975	blue	brown
AC097263.1	-0.570099	3.06996	0.00303347	0.102937	-0.0983593	0.512479	0.609909	0.769546	-0.332585	1.791	0.0775613	0.221765	0.266344	-1.43373	0.156045	0.999975	0.153783	-0.82363	0.412912	0.999994	0.108771	-0.578331	0.564873	0.99975	blue	grey
FASTK	-0.240584	3.28359	0.00159363	0.0784447	-0.259491	3.42675	0.00102028	0.012251	-0.131118	1.7896	0.0777886	0.222191	-0.056784	0.774728	0.441076	0.999975	0.0465129	-0.63139	0.529816	0.999994	-0.00890515	0.120007	0.904817	0.99975	blue	black
AC111200.2	-0.657928	2.17522	0.0329499	0.28476	-0.445394	1.42478	0.158609	0.327168	-0.533594	1.7642	0.0820065	0.229713	-0.125415	0.414491	0.679766	0.999975	-0.176176	0.579313	0.564214	0.999994	-0.161789	0.528147	0.599047	0.99975	blue	grey
MAGED4B	-0.199917	1.41332	0.161936	0.530381	-0.193039	1.32043	0.19094	0.369944	-0.249275	1.7623	0.082329	0.230406	0.0415855	-0.293883	0.769706	0.999975	0.108307	-0.761537	0.448862	0.999994	0.0970068	-0.677133	0.500525	0.99975	blue	red
AL009174.1	-0.46329	2.09573	0.0396772	0.303938	-0.530691	2.32275	0.0230672	0.0937582	-0.388013	1.75526	0.0835353	0.232661	0.121752	-0.550556	0.583669	0.999975	0.00243436	-0.0109524	0.991292	0.999994	0.162497	-0.725788	0.470358	0.99975	blue	magenta
SUMO2P3	-0.537181	3.05376	0.00318179	0.105538	-0.378124	2.07982	0.0411588	0.135935	-0.308038	1.75117	0.0842411	0.233845	0.138736	-0.788394	0.433095	0.999975	0.248407	-1.40449	0.164538	0.999994	0.31989	-1.79554	0.0768289	0.99975	blue	grey
HMOX2	-0.0829688	1.07142	0.287615	0.674271	-0.085426	1.06736	0.289429	0.484806	-0.13536	1.74801	0.0847918	0.234758	-0.0859537	1.10956	0.270939	0.999975	-0.00218621	0.0280788	0.977678	0.999994	0.140812	-1.79542	0.0768487	0.99975	blue	grey
FLOT2	-0.104895	1.77294	0.0805344	0.404763	-0.177617	2.90468	0.00489929	0.0345377	-0.102766	1.737	0.0867304	0.238139	0.0901185	-1.52262	0.132301	0.999975	0.0762544	-1.28187	0.204064	0.999994	-0.013435	0.22421	0.823238	0.99975	blue	turquoise
ACTG1P9	-0.379601	1.48053	0.143162	0.507679	-0.186334	0.703166	0.484255	0.669851	-0.44514	1.73619	0.086875	0.238382	0.255566	-0.996399	0.322445	0.999975	0.0434297	-0.168468	0.866695	0.999994	0.0356779	-0.137395	0.891108	0.99975	blue	grey
GDI2P2	-0.26073	1.74115	0.0859951	0.414538	-0.374002	2.41656	0.0182445	0.0803678	-0.259532	1.7332	0.0874083	0.239418	0.154111	-1.02877	0.307083	0.999975	0.142212	-0.944549	0.348097	0.999994	0.2649	-1.74666	0.0850274	0.99975	blue	grey
EIF1P3	-0.279109	1.50781	0.136047	0.496092	-0.347213	1.81487	0.0737741	0.195958	-0.319531	1.72622	0.0886641	0.24148	0.0377623	-0.203926	0.838996	0.999975	-0.131023	0.703983	0.483749	0.999994	-0.258706	1.37994	0.171942	0.99975	blue	grey
TPGS2	-0.174892	3.65844	0.00048425	0.0433852	-0.132	2.67164	0.00935708	0.052604	-0.082068	1.71676	0.0903888	0.244527	0.00905891	-0.189427	0.850299	0.999975	0.0232367	-0.483438	0.630274	0.999994	0.0372879	-0.770149	0.44377	0.99975	blue	magenta
FTH1P2	-0.369411	2.42004	0.0180844	0.215799	-0.188099	1.19228	0.237128	0.426568	-0.261598	1.71379	0.0909361	0.245507	0.0928905	-0.60831	0.544926	0.999975	0.0394712	-0.257178	0.797786	0.999994	0.0805119	-0.520779	0.604143	0.99975	blue	pink
PEMT	-0.167134	2.27056	0.0262139	0.254372	-0.107866	1.41784	0.160617	0.329623	-0.12577	1.70866	0.0918885	0.247123	0.0527212	-0.715969	0.476362	0.999975	0.0809162	-1.09331	0.277957	0.999994	0.113049	-1.5164	0.133863	0.99975	blue	tan
SIRT2	-0.117761	1.72431	0.0890092	0.419247	-0.0637004	0.902474	0.369861	0.567082	-0.116651	1.7081	0.0919928	0.247295	0.0183124	-0.268042	0.789445	0.999975	-0.062751	0.913855	0.36389	0.999994	-0.0278849	0.403149	0.688052	0.99975	blue	blue
TOLLIP	-0.145564	2.19201	0.0316636	0.279687	-0.111198	1.62018	0.109634	0.255181	-0.112933	1.70067	0.0933869	0.249341	0.0901411	-1.35692	0.179113	0.999975	-0.0148218	0.221989	0.824961	0.999994	-0.0132818	0.197482	0.844016	0.99975	blue	grey
GAPDH	-0.258315	2.78963	0.00677223	0.148002	-0.142817	1.4923	0.140056	0.301458	-0.156891	1.69437	0.094584	0.251704	0.118774	-1.28221	0.203945	0.999975	0.00881975	-0.0947318	0.924795	0.999994	0.0176207	-0.187889	0.8515	0.99975	blue	grey
ACTBP7	-0.428676	2.04579	0.0444885	0.319001	-0.362891	1.67566	0.0982108	0.236755	-0.354075	1.6898	0.0954585	0.253327	0.039001	-0.186058	0.852931	0.999975	-0.0245184	0.116376	0.907683	0.999994	-0.0455814	0.214783	0.830553	0.99975	blue	pink
PPP1R7	-0.142706	2.32349	0.0230253	0.24082	-0.0946386	1.49089	0.140427	0.301898	-0.103777	1.68971	0.095477	0.253327	0.0037842	-0.0615906	0.951062	0.999975	-0.00736727	0.119302	0.905373	0.999994	0.0821997	-1.32145	0.1906	0.99975	blue	pink
TRMT1	-0.168856	2.12316	0.0372329	0.298713	-0.0898793	1.09346	0.277893	0.472785	-0.13434	1.68921	0.0955736	0.253461	0.0767215	-0.964327	0.33816	0.999975	0.124471	-1.5566	0.124019	0.999994	-0.00278605	0.0345888	0.972505	0.99975	blue	grey
PAF1	-0.0725216	0.957807	0.341415	0.716291	-0.107105	1.36867	0.175424	0.350124	-0.127748	1.68724	0.0959534	0.253964	-0.0285945	0.377515	0.706918	0.999975	0.00874809	-0.114912	0.90884	0.999994	-0.0225553	0.294131	0.769517	0.99975	blue	black
HSPE1P3	-0.24135	1.0849	0.28164	0.670652	-0.51545	2.24185	0.0281014	0.106743	-0.371123	1.66829	0.099669	0.260286	-0.239887	1.07793	0.284719	0.999975	-0.0927032	0.414457	0.679791	0.999994	-0.130356	0.578567	0.564715	0.99975	blue	grey
HMGB1P1	-0.170533	1.17194	0.245143	0.632582	-0.158785	1.05581	0.294639	0.490766	-0.241789	1.66168	0.100994	0.262733	-0.320496	2.20172	0.0309405	0.999975	-0.027174	0.185735	0.853183	0.999994	-0.183359	1.24418	0.217531	0.99975	blue	grey
RABGGTA	-0.176089	2.11175	0.038233	0.300836	-0.0137531	0.159584	0.873663	0.934287	-0.138312	1.65875	0.101583	0.263591	-0.128159	1.53639	0.128894	0.999975	-0.0533874	0.636783	0.526317	0.999994	0.0648981	-0.768465	0.444763	0.99975	blue	grey
FAM192BP	-0.342536	1.95791	0.0541769	0.344879	-0.146005	0.807482	0.42209	0.616673	-0.289843	1.65676	0.101988	0.264101	-0.276174	1.57801	0.119015	0.999975	-0.0783699	0.44553	0.657294	0.999994	-0.129054	0.728348	0.4688	0.99975	blue	grey
AC023886.2	-0.387797	2.22718	0.0291114	0.267904	-0.366214	2.035	0.0455912	0.145003	-0.288282	1.65569	0.102204	0.264434	0.0579394	-0.332634	0.740392	0.999975	-0.256184	1.46334	0.147794	0.999994	0.148314	-0.841036	0.403155	0.99975	blue	magenta
STK25	-0.100112	1.57637	0.119392	0.473007	-0.0926431	1.41144	0.162489	0.332096	-0.105121	1.65528	0.102288	0.264434	-0.0103642	0.163135	0.870876	0.999975	-0.000190154	0.00297797	0.997632	0.999994	0.0114581	-0.178142	0.85912	0.99975	blue	grey
SNF8	-0.162316	2.2609	0.0268364	0.257374	-0.0611978	0.824771	0.412268	0.60818	-0.118505	1.65069	0.103226	0.26589	-0.0339337	0.472489	0.638029	0.999975	0.0213905	-0.296334	0.767841	0.999994	0.0816956	-1.12357	0.264986	0.99975	blue	greenyellow
RPS2P55	-0.417428	2.59816	0.0113919	0.181495	-0.342009	2.05968	0.0431024	0.139851	-0.263702	1.64137	0.105149	0.268671	0.150588	-0.936949	0.351966	0.999975	-0.0828628	0.512962	0.609573	0.999994	0.0416472	-0.255948	0.798732	0.99975	blue	magenta
MFSD5	-0.169002	2.65709	0.00973156	0.16724	-0.0776018	1.18049	0.241751	0.432267	-0.103588	1.62867	0.107818	0.272856	-0.0200111	0.314503	0.754062	0.999975	0.125708	-1.96571	0.0532497	0.999994	0.172008	-2.6702	0.00939356	0.99975	blue	tan
KLHL18	-0.0840535	1.28125	0.20428	0.586581	-0.117709	1.73607	0.086895	0.218502	-0.105701	1.61128	0.111563	0.278915	-0.0572434	0.87226	0.386011	0.999975	0.0649578	-0.984808	0.328067	0.999994	0.0548802	-0.825993	0.411579	0.99975	blue	blue
SLC25A39	-0.225602	2.53162	0.0135721	0.194342	-0.157615	1.71132	0.0913947	0.225534	-0.143454	1.60983	0.11188	0.279252	0.0120926	-0.135649	0.892483	0.999975	0.062543	-0.698032	0.48744	0.999994	0.0833303	-0.923293	0.358986	0.99975	blue	black
AL445305.1	-0.471165	2.08362	0.0408004	0.30862	-0.53525	2.29024	0.0249858	0.0988283	-0.363502	1.60755	0.112379	0.28013	0.022286	-0.0985188	0.921798	0.999975	-0.379059	1.66722	0.0998819	0.999994	0.0709801	-0.30993	0.757523	0.99975	blue	grey
TUBB3	-0.17794	1.01537	0.313383	0.695481	-0.0272472	0.150435	0.880849	0.938736	-0.281332	1.60538	0.112855	0.280812	0.130533	-0.744578	0.458988	0.999975	0.00937659	-0.0532152	0.95771	0.999994	0.057525	-0.324106	0.746812	0.99975	blue	blue
RPN2	-0.0919226	1.415	0.161445	0.529693	-0.0636537	0.948063	0.346318	0.543838	-0.103586	1.59459	0.115254	0.284931	0.0375448	-0.577732	0.565276	0.999975	0.0853703	-1.30703	0.195428	0.999994	0.0721914	-1.09724	0.276249	0.99975	blue	greenyellow
NDUFV3	-0.274318	2.48987	0.0151258	0.201408	-0.0853608	0.749649	0.455946	0.646718	-0.173008	1.57036	0.120785	0.294111	-0.0646343	0.586443	0.55944	0.999975	-0.04296	0.387818	0.699313	0.999994	-0.014616	0.130988	0.896156	0.99975	blue	grey
HSP90AB3P	-0.102898	0.775166	0.440819	0.783006	-0.163623	1.19265	0.236983	0.426444	-0.207795	1.56543	0.121935	0.295847	-0.0438519	0.330232	0.742199	0.999975	-0.1395	1.04522	0.299474	0.999994	-0.0110246	0.0820039	0.934875	0.99975	blue	magenta
SLC2A6	-0.3637	2.96942	0.00406868	0.115985	-0.262811	2.0761	0.0415117	0.136595	-0.188693	1.54062	0.127862	0.304684	-0.169058	1.37977	0.171995	0.999975	-0.0726362	0.589825	0.557183	0.999994	0.0184451	-0.148693	0.882218	0.99975	blue	pink
NDUFAF3	-0.290359	2.75362	0.0074817	0.152269	-0.0171243	0.15713	0.875589	0.935543	-0.16211	1.5374	0.128646	0.305994	0.0538038	-0.510061	0.611593	0.999975	-0.00262087	0.0247204	0.980347	0.999994	0.0244511	-0.228954	0.819564	0.99975	blue	tan
BSG	-0.186118	2.30407	0.0241526	0.244896	-0.0239076	0.286367	0.775432	0.875652	-0.124002	1.53513	0.129202	0.306881	0.0212982	-0.263568	0.792877	0.999975	0.0205346	-0.252835	0.801128	0.999994	-0.0470579	0.575204	0.566974	0.99975	blue	grey
AC024619.4	-0.331546	1.44369	0.15323	0.519008	-0.446255	1.88015	0.0641964	0.179852	-0.350539	1.52643	0.131351	0.309914	-0.364928	1.58847	0.11663	0.999975	-0.301143	1.3042	0.196382	0.999994	-0.0876353	0.376784	0.70746	0.99975	blue	grey
DYNC1I2P1	-0.197768	1.19193	0.237262	0.623403	-0.225529	1.31515	0.192697	0.3721	-0.252509	1.52189	0.132484	0.311533	0.0227509	-0.137068	0.891366	0.999975	-0.146187	0.876288	0.383833	0.999994	-0.0330452	0.196646	0.844667	0.99975	blue	grey
ACTG1	-0.13342	1.60682	0.112539	0.462513	-0.0328741	0.383068	0.702815	0.831815	-0.126107	1.51878	0.133266	0.312894	0.12573	-1.51365	0.134561	0.999975	0.125098	-1.49843	0.138461	0.999994	0.0646019	-0.768194	0.444923	0.99975	blue	pink
MMS19	-0.133512	2.00054	0.0492725	0.331068	-0.149109	2.16177	0.0340133	0.120132	-0.100614	1.50763	0.136092	0.317462	0.0427789	-0.640766	0.523741	0.999975	0.013195	-0.196644	0.844669	0.999994	-0.0799697	1.18314	0.240707	0.99975	blue	turquoise
UBC	-0.0963551	1.1679	0.24676	0.634281	-0.106438	1.24826	0.216043	0.400116	-0.123908	1.5019	0.137564	0.319793	0.0383991	-0.465257	0.643173	0.999975	-0.00537128	0.0647515	0.948554	0.999994	-0.0406947	0.487023	0.627744	0.99975	blue	grey
PKM	-0.0818037	0.969477	0.335603	0.711686	-0.155423	1.78221	0.0789974	0.205289	-0.126292	1.49676	0.138895	0.321914	0.1149	-1.36122	0.177756	0.999975	0.0234935	-0.276919	0.782648	0.999994	-0.00526429	0.0616008	0.951054	0.99975	blue	pink
ASMTL	-0.16137	1.21694	0.227663	0.613488	-0.131265	0.957795	0.341421	0.538696	-0.198012	1.49331	0.139794	0.323203	0.0282529	-0.212986	0.831949	0.999975	-0.0182734	0.137059	0.891373	0.999994	-0.0199862	0.148819	0.882119	0.99975	blue	turquoise
VPS11	-0.111475	1.54107	0.127751	0.486004	-0.141561	1.8935	0.0623721	0.176918	-0.107445	1.48539	0.141874	0.326363	0.0576685	-0.796936	0.428149	0.999975	-0.00230419	0.0316813	0.974815	0.999994	-0.0173611	0.236975	0.813359	0.99975	blue	brown
TPI1	-0.143766	1.40628	0.164009	0.534173	-0.118442	1.12098	0.266078	0.459817	-0.151716	1.48408	0.14222	0.326686	0.102575	-1.003	0.319274	0.999975	-0.109711	1.06735	0.289436	0.999994	-0.114728	1.10807	0.271577	0.99975	blue	lightcyan
PSMD11	-0.131654	2.24344	0.0279939	0.262459	-0.0720472	1.18789	0.23884	0.429011	-0.08652	1.47438	0.144806	0.330014	0.0266972	-0.454768	0.650666	0.999975	0.0724275	-1.22752	0.223689	0.999994	0.0964567	-1.62291	0.109046	0.99975	blue	pink
PSMB2	-0.0574732	1.09381	0.277741	0.665998	0.00530109	-0.0976155	0.922513	0.960993	-0.0770026	1.46552	0.1472	0.333942	0.0148056	-0.281671	0.779016	0.999975	-0.00709806	0.134356	0.893502	0.999994	0.0673441	-1.26548	0.209841	0.99975	blue	grey
AC087385.2	-0.353361	1.25494	0.213621	0.597496	-0.284128	0.976328	0.332222	0.528936	-0.412416	1.46471	0.147421	0.334078	-0.131487	0.466799	0.642075	0.999975	0.00513808	-0.0181488	0.985571	0.999994	0.162622	-0.57025	0.570311	0.99975	blue	magenta
ACTBP11	-0.507762	2.70753	0.00848859	0.157576	-0.20119	1.038	0.302797	0.499685	-0.2709	1.44456	0.152988	0.342701	-0.0342769	0.182708	0.855549	0.999975	0.00337297	-0.0178883	0.985778	0.999994	0.00333205	-0.0175431	0.986053	0.99975	blue	grey
AC079228.1	-0.310714	1.87885	0.0643763	0.37136	-0.329043	1.92513	0.0582252	0.169403	-0.238318	1.44111	0.153956	0.344195	-0.00502649	0.0303834	0.975847	0.999975	-0.119563	0.719063	0.474466	0.999994	-0.0985206	0.588218	0.558255	0.99975	blue	red
GAPDHP60	-0.392732	1.56485	0.12207	0.476489	-0.481546	1.85649	0.0675385	0.186102	-0.360058	1.4347	0.15577	0.346967	0.0203181	-0.0809287	0.935727	0.999975	-0.172657	0.684232	0.496059	0.999994	0.0732455	-0.288164	0.774062	0.99975	blue	grey
DDA1	-0.193857	2.11247	0.0381698	0.300758	-0.0558594	0.588956	0.557763	0.729932	-0.131227	1.43002	0.157103	0.349124	0.0480082	-0.522956	0.602635	0.999975	0.0686308	-0.743823	0.459442	0.999994	0.120736	-1.29906	0.198134	0.99975	blue	pink
LYPLA1P3	-0.109932	0.793027	0.430408	0.777272	-0.21752	1.51825	0.133399	0.291704	-0.196535	1.4178	0.16063	0.354391	0.0295488	-0.213082	0.831875	0.999975	0.209633	-1.50406	0.137007	0.999994	0.0941869	-0.670867	0.504485	0.99975	blue	grey
YIF1B	-0.198654	2.87555	0.00532203	0.131367	-0.196244	2.74851	0.00758773	0.0457743	-0.0975409	1.41195	0.162338	0.357098	0.041266	-0.597112	0.552335	0.999975	0.00419642	-0.0604148	0.951995	0.999994	0.077304	-1.10486	0.272957	0.99975	blue	grey
PICK1	-0.0350307	0.411537	0.68192	0.905444	-0.16559	1.88222	0.0639099	0.17931	-0.119593	1.405	0.164387	0.360009	-0.0811391	0.952867	0.343895	0.999975	-0.0945854	1.10516	0.272826	0.999994	-0.0237642	0.275654	0.783616	0.99975	blue	grey
EIF3CL	-0.189441	1.05332	0.295771	0.681585	-0.0546419	0.293962	0.769646	0.872263	-0.252047	1.40146	0.16544	0.361285	-0.0322957	0.179503	0.858054	0.999975	-0.0775548	0.428882	0.66931	0.999994	-0.0774942	0.425439	0.671805	0.99975	blue	grey
RPS3AP49	-0.462477	1.95154	0.0549445	0.347653	-0.350617	1.43152	0.156675	0.324761	-0.329515	1.3905	0.168726	0.365972	-0.00218355	0.00921066	0.992677	0.999975	-0.539531	2.26436	0.0266121	0.999994	-0.17957	0.748172	0.456831	0.99975	blue	grey
TRAPPC1	-0.057411	0.842349	0.402425	0.757619	0.0406205	-0.57666	0.565996	0.736099	-0.0946388	1.3886	0.169302	0.366832	0.0289618	-0.42478	0.672284	0.999975	0.00201542	-0.0294107	0.97662	0.999994	0.0408835	-0.592279	0.555548	0.99975	blue	greenyellow
PRPF4	0.00821057	-0.128873	0.897823	0.974229	-0.142277	2.16073	0.0340967	0.120204	-0.0870944	1.36706	0.175925	0.375511	-0.0392222	0.615405	0.540258	0.999975	0.0436308	-0.681118	0.498016	0.999994	0.0116171	-0.180039	0.857635	0.99975	blue	turquoise
RPS2P35	-0.372583	2.13419	0.0362869	0.296194	-0.203631	1.12858	0.262882	0.456504	-0.231955	1.32869	0.188212	0.391561	0.119387	-0.683607	0.496452	0.999975	-0.078202	0.445521	0.6573	0.999994	0.194226	-1.09849	0.275706	0.99975	blue	grey
UBE2L6	-0.128164	1.58275	0.11793	0.47088	-0.115456	1.37956	0.172058	0.34532	-0.106452	1.31465	0.192865	0.398509	0.0416814	-0.514551	0.608467	0.999975	-0.0451171	0.55415	0.58122	0.999994	-0.0121924	0.148667	0.882239	0.99975	blue	salmon
ACOT7	-0.224142	1.75077	0.0843108	0.411929	-0.102408	0.773957	0.441529	0.634466	-0.168206	1.31389	0.193119	0.398693	-0.0748501	0.58444	0.56078	0.999975	-0.0172278	0.133837	0.893911	0.999994	0.119358	-0.920532	0.360417	0.99975	blue	blue
AL354714.2	-0.243834	1.52629	0.131387	0.490904	-0.229691	1.39112	0.168541	0.34055	-0.209728	1.31283	0.193473	0.399182	0.0994066	-0.622012	0.535929	0.999975	0.0395466	-0.246203	0.806237	0.999994	0.0320469	-0.198066	0.84356	0.99975	blue	grey
CORO1A	-0.187542	1.3208	0.190816	0.569451	-0.163178	1.11193	0.269924	0.464434	-0.185166	1.30409	0.19642	0.402918	-0.0998881	0.703222	0.48422	0.999975	-0.121261	0.849373	0.398533	0.999994	-0.0850547	0.591449	0.556101	0.99975	blue	blue
GAPDHP72	-0.2726	1.30479	0.196183	0.575961	-0.179023	0.829092	0.409835	0.606001	-0.271493	1.29952	0.197975	0.405169	0.217873	-1.04246	0.300741	0.999975	0.0816305	-0.388606	0.698732	0.999994	0.121759	-0.575438	0.566817	0.99975	blue	grey
TCF25	-0.077214	1.21193	0.229561	0.615471	0.0286217	-0.434666	0.665125	0.807695	-0.081951	1.28632	0.202517	0.410858	-0.0306638	0.481116	0.631915	0.999975	-0.0331098	0.516869	0.606856	0.999994	0.0291565	-0.451855	0.652753	0.99975	blue	turquoise
HIST1H3PS1	-0.182328	0.7109	0.479479	0.806498	-0.647955	2.44442	0.016997	0.0771194	-0.326384	1.2726	0.207316	0.417616	-0.0479331	0.186823	0.852333	0.999975	-0.131773	0.511	0.610939	0.999994	0.0637681	-0.245493	0.806784	0.99975	blue	grey
SNCG	-0.223753	0.939821	0.3505	0.723395	-0.246374	1.00126	0.320105	0.516912	-0.300823	1.26357	0.210524	0.421237	-0.302546	1.27031	0.208128	0.999975	-0.298135	1.24546	0.217062	0.999994	0.0655383	-0.271802	0.786564	0.99975	blue	blue
SLC52A2	-0.141057	1.80463	0.0753801	0.394396	-0.0851732	1.05432	0.295314	0.491463	-0.0983743	1.2586	0.212305	0.423485	0.106456	-1.36146	0.17768	0.999975	0.133775	-1.7022	0.0930988	0.999994	0.0679827	-0.858763	0.393365	0.99975	blue	pink
RPL36AP21	-0.316374	1.39087	0.168616	0.541264	-0.455661	1.93823	0.056578	0.166441	-0.285907	1.25696	0.212894	0.424196	-0.110992	0.487771	0.627217	0.999975	-0.132429	0.57904	0.564397	0.999994	-0.258178	1.12069	0.266202	0.99975	blue	grey
MON1A	-0.131883	1.51191	0.135001	0.493872	-0.108638	1.20503	0.2322	0.42065	-0.108854	1.24793	0.216161	0.428401	-0.0342361	0.392341	0.695984	0.999975	-0.00782476	0.0892176	0.929161	0.999994	0.113237	-1.28176	0.204101	0.99975	blue	blue
PSMD3	-0.0659295	1.11807	0.267311	0.65601	-0.122619	2.01199	0.0480222	0.150117	-0.0733692	1.24427	0.217499	0.429995	-0.0213606	0.362113	0.718345	0.999975	-0.00605038	0.10205	0.919005	0.999994	0.0185163	-0.310045	0.757436	0.99975	blue	grey
FBXL12	-0.0738137	0.824125	0.412632	0.76613	-0.0714928	0.772318	0.442493	0.635193	-0.110197	1.23037	0.222625	0.436269	-0.0462182	0.515835	0.607574	0.999975	-0.0196691	0.218415	0.827733	0.999994	0.0161799	-0.178366	0.858944	0.99975	blue	turquoise
GNG3	-0.0959107	0.709663	0.480241	0.807218	-0.0450538	0.322548	0.747987	0.859093	-0.163503	1.20982	0.230366	0.445345	-0.100125	0.740573	0.461398	0.999975	-0.206374	1.51874	0.133276	0.999994	0.109001	-0.796334	0.428496	0.99975	blue	blue
AC018738.1	-0.531093	2.28533	0.025287	0.250547	-0.320632	1.33494	0.186166	0.363299	-0.277567	1.19442	0.236294	0.452327	-0.143185	0.615909	0.539927	0.999975	-0.273808	1.17183	0.245187	0.999994	-0.326663	1.38791	0.169512	0.99975	blue	magenta
HSP90AA2P	0.134024	-1.13268	0.261163	0.649502	0.106677	-0.872321	0.385978	0.582095	-0.13935	1.17773	0.242842	0.460629	-0.0385686	0.325839	0.745506	0.999975	-0.165319	1.38961	0.168996	0.999994	0.023502	-0.196116	0.84508	0.99975	blue	magenta
FTH1P11	-0.362835	2.2465	0.0277884	0.261069	-0.260648	1.56145	0.122871	0.276539	-0.189389	1.17263	0.244869	0.463003	0.131469	-0.813695	0.418544	0.999975	0.147111	-0.905908	0.368053	0.999994	0.0196813	-0.120318	0.904571	0.99975	blue	grey
SCFD2	-0.0786717	1.05313	0.295859	0.681695	-0.155942	2.01977	0.0471873	0.148297	-0.0874065	1.17008	0.245886	0.463912	0.00390277	-0.0522247	0.958497	0.999975	0.0909117	-1.21038	0.230151	0.999994	0.129566	-1.71252	0.0911719	0.99975	blue	pink
RNH1	-0.14305	1.47801	0.143833	0.509181	-0.118797	1.18761	0.23895	0.429026	-0.112859	1.1661	0.247481	0.465701	0.0204981	-0.211712	0.832939	0.999975	0.079248	-0.814369	0.418161	0.999994	0.0267181	-0.27257	0.785976	0.99975	blue	turquoise
POTEE	-0.247881	2.11352	0.0380768	0.300502	-0.0516466	0.426071	0.671347	0.81211	-0.133195	1.13569	0.25991	0.479678	0.0460893	-0.392829	0.695625	0.999975	0.0289634	-0.245614	0.80669	0.999994	-0.0380966	0.320723	0.749364	0.99975	blue	turquoise
NELFCD	-0.0859753	1.04927	0.297618	0.683246	-0.119688	1.41332	0.161936	0.331367	-0.0928419	1.1331	0.26099	0.480886	0.0155465	-0.189666	0.850113	0.999975	0.0802068	-0.973568	0.333581	0.999994	0.0525348	-0.633056	0.528734	0.99975	blue	brown
C20orf27	-0.171264	1.83132	0.0712545	0.386963	-0.0289238	0.299248	0.765627	0.870396	-0.104189	1.11412	0.268992	0.489134	0.0864433	-0.923995	0.358623	0.999975	0.0193209	-0.205478	0.837787	0.999994	0.0649308	-0.685534	0.495243	0.99975	blue	grey
PPP2R1A	-0.0926397	1.65289	0.102775	0.444193	-0.0332988	0.574848	0.567214	0.73678	-0.0622574	1.11083	0.270394	0.490466	0.00225286	-0.0401812	0.968062	0.999975	0.0231904	-0.411526	0.681928	0.999994	0.0408838	-0.720244	0.473743	0.99975	blue	grey
ATP1B3P1	-0.476634	2.42691	0.017772	0.214493	-0.456488	2.24892	0.0276257	0.10564	-0.215474	1.09717	0.27628	0.496525	-0.319688	1.62718	0.108136	0.999975	-0.0723628	0.366458	0.715114	0.999994	0.0817652	-0.411071	0.68226	0.99975	blue	grey
MTRNR2L10	-0.481615	2.11317	0.0381078	0.300549	-0.392401	1.66587	0.100152	0.239904	-0.228243	1.00148	0.320002	0.541245	0.130346	-0.571704	0.569331	0.999975	-0.292467	1.2763	0.206015	0.999994	0.431421	-1.86903	0.0657496	0.99975	blue	grey
GAPDHP71	-0.588957	2.46408	0.0161637	0.206722	-0.409514	1.65774	0.101789	0.242694	-0.237862	0.995189	0.323029	0.54436	0.225742	-0.944114	0.348318	0.999975	-0.238262	0.99144	0.324843	0.999994	0.00648178	-0.026776	0.978714	0.99975	blue	grey
RPL10AP2	-0.127268	0.616222	0.539722	0.837538	-0.120209	0.563163	0.575101	0.743874	-0.198824	0.962719	0.338961	0.560948	-0.0609073	0.294802	0.769007	0.999975	-0.458445	2.20774	0.030499	0.999994	-0.120421	0.575709	0.566635	0.99975	blue	magenta
ALDOC	-0.629637	1.81628	0.0735548	0.392037	-0.61768	1.72399	0.0890685	0.221524	-0.329704	0.951103	0.344783	0.567092	-0.448893	1.29442	0.19972	0.999975	-0.65638	1.88317	0.0637796	0.999994	-0.403562	1.14943	0.25424	0.99975	blue	blue
PRKCZ	-0.0540721	0.297473	0.766975	0.936419	-0.0734833	0.391148	0.696861	0.829114	-0.169558	0.932832	0.354073	0.575967	-0.106673	0.586639	0.55931	0.999975	-0.187729	1.02718	0.307826	0.999994	-0.0812717	0.441464	0.660221	0.99975	blue	blue
COG7	-0.0517864	0.58062	0.563338	0.850834	0.0691262	-0.749888	0.455803	0.646718	-0.0808938	0.906989	0.367485	0.588762	0.0269355	-0.301886	0.763623	0.999975	0.0553188	-0.616865	0.5393	0.999994	-0.0400398	0.443251	0.658934	0.99975	blue	green
NSG1	-0.140326	0.595573	0.553357	0.84531	-0.184133	0.756144	0.452068	0.643482	-0.202697	0.860307	0.39252	0.613076	-0.10959	0.464952	0.643391	0.999975	-0.179306	0.756888	0.451625	0.999994	-0.0184887	0.077479	0.938461	0.99975	blue	blue
AC006511.3	-0.190202	1.28819	0.201869	0.583915	-0.240475	1.57584	0.119515	0.270845	-0.124348	0.8422	0.402508	0.621018	-0.0559956	0.379105	0.705743	0.999975	-0.324557	2.18623	0.0321013	0.999994	-0.0117487	0.0785663	0.937599	0.99975	blue	grey
CPT1C	-0.139474	1.65565	0.102214	0.443446	-0.040404	0.464063	0.644025	0.793919	-0.0697731	0.828272	0.410296	0.627607	-0.0729057	0.865122	0.38989	0.999975	0.0245964	-0.290395	0.772362	0.999994	0.021631	-0.253532	0.800591	0.99975	blue	green
TKT	-0.159374	1.62573	0.108445	0.455318	-0.087292	0.861553	0.391838	0.588001	-0.0787296	0.803115	0.424592	0.640146	0.166918	-1.70206	0.0931255	0.999975	0.0325908	-0.330648	0.741885	0.999994	0.0840266	-0.846307	0.400229	0.99975	blue	turquoise
ACTL6B	-0.165535	0.630078	0.530669	0.832097	-0.181062	0.666822	0.50705	0.688247	-0.208972	0.795432	0.429017	0.64402	-0.285741	1.08722	0.28062	0.999975	-0.350624	1.32736	0.188649	0.999994	-0.0656926	0.24689	0.805707	0.99975	blue	blue
TMEM53	-0.246806	2.90764	0.00485816	0.125504	-0.132887	1.51476	0.134279	0.292773	-0.0667593	0.786515	0.434187	0.648046	0.011736	-0.138212	0.890464	0.999975	0.0372261	-0.436188	0.664026	0.999994	0.198209	-2.30563	0.0240604	0.99975	blue	grey
FXYD6	-0.116722	1.06924	0.288588	0.675188	0.00443349	-0.0392958	0.968765	0.985041	-0.084148	0.770862	0.44335	0.655483	-0.0301436	0.276032	0.783327	0.999975	-0.0856384	0.780247	0.437843	0.999994	-0.0273923	0.247761	0.805036	0.99975	blue	blue
RPS27P29	-0.284202	1.34102	0.184194	0.561468	-0.205922	0.940132	0.350342	0.54782	-0.162614	0.767321	0.445438	0.657594	0.0102682	-0.0484334	0.961507	0.999975	-0.104854	0.49208	0.624183	0.999994	-0.0525909	0.245019	0.807149	0.99975	blue	magenta
FBXO44	-0.107293	1.38746	0.169647	0.542535	-0.0682661	0.854144	0.395902	0.591586	-0.059193	0.765472	0.446531	0.658437	-0.075203	0.972131	0.334291	0.999975	-0.0853197	1.09734	0.276208	0.999994	0.0187431	-0.239315	0.811552	0.99975	blue	blue
ATP6AP1	-0.158802	2.37067	0.0204783	0.229035	-0.0850097	1.22789	0.22355	0.409627	-0.0512399	0.764948	0.446841	0.658574	0.0639671	-0.954577	0.343035	0.999975	0.0508712	-0.755312	0.452564	0.999994	0.102402	-1.5094	0.135642	0.99975	blue	grey
RHOT2	-0.104027	1.28517	0.202914	0.584806	-0.0761422	0.910166	0.365819	0.562873	-0.0609941	0.753556	0.453611	0.664203	-0.047462	0.586145	0.55964	0.999975	0.0577163	-0.709181	0.480538	0.999994	-0.0325309	0.396821	0.692691	0.99975	blue	turquoise
GDAP1L1	-0.22778	0.877223	0.383329	0.746081	-0.0872765	0.325214	0.745977	0.858312	-0.191544	0.737687	0.463139	0.672758	-0.288378	1.11019	0.270668	0.999975	-0.358968	1.37496	0.173473	0.999994	0.0032757	-0.012456	0.990097	0.99975	blue	blue
BCAT2	-0.0998943	0.579406	0.564152	0.851419	-0.169872	0.953328	0.343663	0.541224	-0.121192	0.702952	0.484387	0.691164	0.18613	-1.07919	0.284159	0.999975	0.202656	-1.16908	0.246288	0.999994	0.262765	-1.50484	0.136807	0.99975	blue	pink
NRN1	-0.305608	0.984489	0.328223	0.707301	-0.281245	0.876615	0.383657	0.579886	-0.217699	0.701314	0.485403	0.691982	-0.401794	1.29387	0.199909	0.999975	-0.612805	1.96341	0.0535219	0.999994	-0.499053	1.58736	0.116882	0.99975	blue	blue
CDC25B	-0.102009	1.02942	0.306779	0.690233	-0.0813714	0.79452	0.429544	0.623586	-0.0664241	0.670335	0.504822	0.707218	0.115822	-1.16839	0.246565	0.999975	-0.0154594	0.155164	0.877133	0.999994	-0.0791718	0.788874	0.432816	0.99975	blue	red
ACTB	-0.208996	2.54875	0.0129776	0.190424	-0.0224908	0.265382	0.791485	0.885629	-0.0493321	0.60163	0.549339	0.742373	0.134845	-1.64386	0.104633	0.999975	0.178033	-2.15939	0.0342039	0.999994	0.0790082	-0.951355	0.344657	0.99975	blue	pink
EIF3C	-0.106958	0.822906	0.413321	0.766382	0.03214	-0.239256	0.811597	0.89709	-0.0763465	0.587407	0.558797	0.749236	0.0124735	-0.0959333	0.923844	0.999975	0.0200882	-0.153717	0.87827	0.999994	-0.0473618	0.35979	0.720074	0.99975	blue	grey
NKIRAS2	-0.0263719	0.420024	0.675738	0.902959	0.0168321	-0.259387	0.796088	0.888456	-0.0346597	0.552036	0.58266	0.767259	0.0204113	-0.32497	0.746161	0.999975	0.0329225	-0.521515	0.603634	0.999994	0.0917103	-1.44222	0.153644	0.99975	blue	grey
PPME1	-0.0269265	0.359529	0.720268	0.920665	-0.101746	1.31447	0.192926	0.372313	-0.0401661	0.536321	0.593416	0.773849	0.0945612	-1.26214	0.211034	0.999975	0.125086	-1.66113	0.101103	0.999994	0.0127152	-0.167633	0.867349	0.99975	blue	pink
APBB3	-0.0347941	0.326444	0.74505	0.929213	-0.050895	0.462014	0.645486	0.79491	-0.0537256	0.504075	0.615772	0.788106	-0.070789	0.663912	0.5089	0.999975	-0.0772432	0.720784	0.473413	0.999994	-0.186438	1.72711	0.0885033	0.99975	blue	blue
RPS4XP6	-0.101553	0.38669	0.700144	0.912385	-0.198868	0.732681	0.466168	0.655182	-0.129372	0.49263	0.623796	0.792855	-0.213613	0.813094	0.418886	0.999975	-0.143314	0.542751	0.589004	0.999994	0.0332656	-0.125068	0.900823	0.99975	blue	magenta
RUNDC3A	-0.0810481	0.329178	0.742991	0.928424	-0.0779194	0.306204	0.760346	0.866475	-0.0914971	0.371626	0.71128	0.851112	-0.196705	0.798628	0.427173	0.999975	-0.239012	0.965492	0.33758	0.999994	-0.0957318	0.383907	0.702197	0.99975	blue	blue
IDH3G	-0.0980651	1.31949	0.191249	0.569858	0.0553411	-0.720474	0.473602	0.661984	-0.0234155	0.31507	0.753634	0.876401	-0.00761572	0.102434	0.918701	0.999975	-0.0197375	0.264135	0.792442	0.999994	0.0810217	-1.0764	0.285396	0.99975	blue	black
RBM10	0.0254693	-0.486851	0.627866	0.88129	0.17347	-3.20835	0.00200524	0.0193034	0.129131	-2.46842	0.0159846	0.0821198	0.0771443	-1.47409	0.144884	0.999975	0.0854973	-1.62545	0.108505	0.999994	-0.018225	0.343975	0.731883	0.99975	brown	green
JAKMIP2	0.125763	-2.20997	0.0303373	0.273828	0.203801	-3.46511	0.000903643	0.0113682	0.155043	-2.72456	0.00810309	0.0538922	-0.0513073	0.901266	0.370499	0.999975	-0.0296238	0.517744	0.606249	0.999994	0.0476644	-0.827005	0.411009	0.99975	brown	blue
SAFB2	0.0516667	-0.698068	0.487418	0.81205	0.360438	-4.71188	1.18823e-05	0.000518532	0.158249	-2.13815	0.0359526	0.13595	-0.156745	2.11701	0.0377691	0.999975	-0.0660753	0.887907	0.377593	0.999994	-0.0267804	0.357261	0.721958	0.99975	brown	green
HGS	0.0254932	-0.46231	0.645275	0.888967	0.132526	-2.32536	0.0229194	0.0934493	0.159525	-2.893	0.00506494	0.0403426	0.0420564	-0.762399	0.448351	0.999975	0.0846352	-1.52652	0.13133	0.999994	-0.00359171	0.0643119	0.948903	0.99975	brown	black
AGPAT1	-0.0100102	0.156634	0.875979	0.966193	0.228874	-3.46511	0.000903656	0.0113682	0.159545	-2.49653	0.0148677	0.0783347	0.0313772	-0.490793	0.625089	0.999975	0.0449614	-0.69972	0.486392	0.999994	0.149067	-2.30307	0.0242122	0.99975	brown	grey
THRAP3	0.122755	-2.35653	0.0212141	0.23295	0.330057	-6.13056	4.4302e-08	5.81524e-06	0.160531	-3.08179	0.00292935	0.0285401	0.0233868	-0.448792	0.65495	0.999975	0.0221104	-0.422154	0.67419	0.999994	0.0622295	-1.17954	0.242128	0.99975	brown	turquoise
ABLIM1	0.0362672	-0.467306	0.641714	0.887612	0.146661	-1.82843	0.0716913	0.192802	0.161101	-2.07585	0.041536	0.14939	0.0273839	-0.352714	0.725349	0.999975	-0.00374039	0.0479342	0.961903	0.999994	-0.0446611	0.568196	0.571697	0.99975	brown	brown
ACIN1	-0.0158784	0.217797	0.828213	0.954152	0.207277	-2.75089	0.00753816	0.0456849	0.161974	-2.22177	0.0294924	0.120047	-0.0491794	0.674323	0.502299	0.999975	-0.0705267	0.962141	0.339249	0.999994	-0.0337571	0.457183	0.648937	0.99975	brown	green
BRD2	0.0483204	-0.857086	0.394285	0.753098	0.207656	-3.56382	0.000658771	0.00915091	0.165076	-2.92812	0.00458197	0.0377733	0.00750014	-0.132986	0.894582	0.999975	0.0322546	-0.56902	0.571141	0.999994	0.0472949	-0.828303	0.410279	0.99975	brown	greenyellow
SLC25A22	0.0232212	-0.311363	0.756439	0.933088	0.203204	-2.63629	0.0102905	0.055682	0.169966	-2.27906	0.0256772	0.110205	-0.0466343	0.625071	0.533931	0.999975	-0.101526	1.35395	0.180053	0.999994	-0.0572468	0.757906	0.451019	0.99975	brown	green
MBD5	0.0953196	-1.27097	0.207892	0.591256	0.280912	-3.62411	0.000541743	0.00801164	0.172042	-2.29403	0.0247546	0.107645	-0.052798	0.703742	0.483899	0.999975	-0.0744475	0.987294	0.326856	0.999994	-0.0406577	0.535277	0.594133	0.99975	brown	red
TCERG1	0.0675202	-1.07399	0.286469	0.67419	0.234716	-3.61233	0.000562944	0.00824098	0.174942	-2.78273	0.00690318	0.0487251	-0.00782063	0.124351	0.901389	0.999975	0.0255472	-0.404159	0.687312	0.999994	-0.0166925	0.262161	0.793957	0.99975	brown	grey
GALNT16	0.156512	-1.77566	0.0800797	0.403328	0.338049	-3.71081	0.00040759	0.00664367	0.176892	-2.00692	0.0485722	0.164692	0.0829041	-0.94022	0.350297	0.999975	0.247922	-2.79749	0.00662594	0.999994	0.0756602	-0.847542	0.399545	0.99975	brown	purple
SBNO1	0.0497128	-0.897474	0.372504	0.739451	0.198248	-3.4629	0.000910011	0.0114142	0.179213	-3.23544	0.00184673	0.0216407	-0.0215094	0.388171	0.699053	0.999975	-0.0206638	0.371027	0.711724	0.999994	0.0085813	-0.152964	0.878861	0.99975	brown	grey
TBC1D16	0.0443016	-0.514997	0.608157	0.87234	0.346254	-3.89455	0.000220274	0.00433071	0.179311	-2.08451	0.0407176	0.147292	-0.0915508	1.06387	0.290998	0.999975	-0.123406	1.4268	0.158028	0.999994	-0.16825	1.93117	0.0574602	0.99975	brown	blue
RPAP1	0.00192692	-0.0213189	0.983051	0.997061	0.38224	-4.0918	0.000111753	0.00267654	0.185449	-2.05181	0.0438826	0.154741	-0.0093215	0.103093	0.91818	0.999975	-0.0282857	0.31125	0.756524	0.999994	-0.0829082	0.905692	0.368167	0.99975	brown	green
CPTP	-0.00619488	0.0761737	0.939495	0.984035	0.289725	-3.44695	0.000957201	0.0117707	0.18581	-2.28482	0.0253186	0.109336	-0.0398728	0.490106	0.625572	0.999975	-0.0147217	0.180041	0.857634	0.999994	0.0103728	-0.125936	0.900139	0.99975	brown	grey
DTX3	0.0318689	-0.457681	0.648581	0.890381	0.226847	-3.15214	0.00237558	0.0216358	0.188958	-2.71376	0.00834563	0.0548814	-0.0108661	0.155995	0.87648	0.999975	-0.142162	2.03058	0.0460493	0.999994	-0.0733067	1.03949	0.302108	0.99975	brown	red
SF3B4	-0.048682	0.662434	0.509841	0.823816	0.184521	-2.42939	0.0176603	0.078882	0.18905	-2.57254	0.0121907	0.0688774	-0.0251545	0.342161	0.733242	0.999975	0.0233508	-0.316022	0.752914	0.999994	0.0586464	-0.787947	0.433354	0.99975	brown	greenyellow
KLHL26	0.030833	-0.356288	0.722683	0.921788	0.353999	-3.9579	0.00017749	0.0037285	0.189812	-2.19341	0.0315584	0.125214	-0.11967	1.38233	0.17121	0.999975	0.00996517	-0.114528	0.909143	0.999994	-0.183879	2.09797	0.0394729	0.99975	brown	brown
ATXN1	0.00684305	-0.0952945	0.92435	0.980775	0.237384	-3.1985	0.00206593	0.0196297	0.191897	-2.67237	0.00933856	0.059083	0.00288425	-0.0401506	0.968086	0.999975	-0.089526	1.23996	0.219077	0.999994	-0.0823241	1.13195	0.26147	0.99975	brown	grey
PRKCSH	0.0146364	-0.162735	0.87119	0.965678	0.414745	-4.46175	2.98914e-05	0.000988481	0.193349	-2.14981	0.0349832	0.133477	0.104424	-1.16062	0.24969	0.999975	0.133672	-1.47819	0.143787	0.999994	0.0984254	-1.08053	0.28357	0.99975	brown	grey
GSK3B	0.0153014	-0.229552	0.819101	0.951173	0.236516	-3.4331	0.00100005	0.0120956	0.195508	-2.93308	0.00451735	0.0374779	-0.0927675	1.39119	0.168519	0.999975	-0.0817099	1.21917	0.226819	0.999994	-0.0168362	0.249387	0.803783	0.99975	brown	blue
IGF2BP1	0.0514813	-0.526477	0.6002	0.868043	0.251221	-2.48578	0.0152862	0.0721409	0.198996	-2.03509	0.0455813	0.158272	0.0142671	-0.14585	0.884454	0.999975	-0.000387083	0.00393708	0.99687	0.999994	-0.143422	1.44819	0.151971	0.99975	brown	grey
CC2D1A	0.00444897	-0.050614	0.959775	0.989913	0.339305	-3.73491	0.000376351	0.00634105	0.201241	-2.28949	0.0250313	0.10843	-0.0275787	0.313637	0.754718	0.999975	-0.0107079	0.12116	0.903907	0.999994	-0.0829601	0.931885	0.354559	0.99975	brown	green
TOB2	-0.022771	0.273179	0.78551	0.9412	0.153983	-1.78737	0.0781515	0.20375	0.202578	-2.43035	0.0176174	0.0868752	0.0479581	-0.575132	0.567023	0.999975	0.0230564	-0.275105	0.784036	0.999994	-0.05447	0.645213	0.520872	0.99975	brown	turquoise
TBC1D17	-0.210196	2.46792	0.0160053	0.206097	0.200129	-2.27349	0.0260277	0.101674	0.202754	-2.3806	0.0199752	0.093624	-0.0465426	0.546258	0.586603	0.999975	-0.0341942	0.3993	0.690873	0.999994	-0.0278284	0.322608	0.747941	0.99975	brown	green
SLC43A2	0.0834408	-1.02467	0.309002	0.691806	0.330123	-3.92247	0.000200324	0.00408194	0.204364	-2.50969	0.0143692	0.0768432	0.0278536	-0.341924	0.73342	0.999975	0.0573396	-0.70033	0.486013	0.999994	-0.21402	2.59503	0.0114867	0.99975	brown	turquoise
WWP2	0.0954866	-1.42126	0.159624	0.527126	0.25439	-3.66363	0.000476088	0.00734876	0.206812	-3.07836	0.00295921	0.0286989	0.0529938	-0.788495	0.433036	0.999975	0.0302408	-0.447679	0.65575	0.999994	-0.0274465	0.403368	0.687892	0.99975	brown	brown
CCDC174	0.122951	-1.56862	0.121189	0.475217	0.244699	-3.02062	0.00350631	0.0277701	0.20783	-2.65157	0.00987704	0.0610617	0.01172	-0.149471	0.881607	0.999975	-0.101862	1.29252	0.200372	0.999994	0.0308197	-0.388235	0.699005	0.99975	brown	magenta
AP2A2	0.0452837	-0.549012	0.584722	0.861865	0.290045	-3.40238	0.00110163	0.0128559	0.210247	-2.54906	0.0129671	0.0717277	0.0323901	-0.392549	0.695831	0.999975	-0.0708333	0.854119	0.395916	0.999994	-0.0270333	0.323608	0.747187	0.99975	brown	grey
SMG6	0.0712114	-0.843925	0.40155	0.757342	0.372632	-4.2728	5.90453e-05	0.00167706	0.210382	-2.49329	0.0149927	0.07872	-0.0451161	0.534475	0.594685	0.999975	-0.0175539	0.206904	0.836678	0.999994	-0.122412	1.43239	0.156427	0.99975	brown	green
STAU1	0.0289377	-0.603833	0.547882	0.842655	0.244183	-4.92998	5.21927e-06	0.000262249	0.212381	-4.43178	3.33318e-05	0.00196658	-0.00309902	0.0646425	0.948641	0.999975	-0.0725417	1.5055	0.136637	0.999994	-0.0625265	1.28825	0.201849	0.99975	brown	red
IKZF4	0.0160035	-0.18287	0.855422	0.962925	0.257431	-2.84621	0.00578156	0.0383918	0.212635	-2.42981	0.0176412	0.0868752	-0.107303	1.22569	0.22437	0.999975	-0.0506165	0.575257	0.566939	0.999994	0.0103322	-0.116574	0.907527	0.99975	brown	red
NLGN4X	0.0296089	-0.284185	0.777097	0.938491	0.285233	-2.64884	0.00994992	0.0546487	0.213738	-2.05149	0.0439146	0.154821	0.0784788	-0.752959	0.453967	0.999975	0.0459031	-0.438189	0.662582	0.999994	-0.0720133	0.682451	0.497177	0.99975	brown	red
CLPTM1	-0.0763099	0.950101	0.345289	0.719603	0.19879	-2.39475	0.0192771	0.0833339	0.214682	-2.67297	0.00932336	0.0590619	0.0366042	-0.455576	0.650087	0.999975	0.0211319	-0.261679	0.794328	0.999994	0.069934	-0.859722	0.39284	0.99975	brown	black
VAC14	0.0410545	-0.613372	0.541593	0.838803	0.335785	-4.85402	6.9637e-06	0.000330698	0.215495	-3.21967	0.00193752	0.0223488	0.0711293	-1.06231	0.291699	0.999975	0.0115238	-0.171238	0.864524	0.999994	-0.0312807	0.461446	0.645891	0.99975	brown	grey
ARHGDIA	-0.0663202	0.618237	0.5384	0.836714	0.293366	-2.64604	0.010025	0.054777	0.216032	-2.0139	0.0478161	0.163141	0.205052	-1.9108	0.0600742	0.999975	0.129722	-1.20272	0.233086	0.999994	0.121882	-1.12184	0.265717	0.99975	brown	pink
GOLGB1	0.17539	-2.09092	0.0401201	0.30574	0.532993	-6.14796	4.12467e-08	5.45649e-06	0.2193	-2.61446	0.0109086	0.0645859	0.00690722	-0.0823146	0.934629	0.999975	0.0296156	-0.351151	0.726516	0.999994	0.0447296	-0.526513	0.600175	0.99975	brown	green
GRIPAP1	0.091486	-1.29289	0.200247	0.581628	0.369824	-5.05684	3.21113e-06	0.000178275	0.222059	-3.13823	0.00247664	0.0258391	-0.0756921	1.0693	0.288563	0.999975	0.00268246	-0.0377034	0.97003	0.999994	-0.0339588	0.473848	0.637064	0.99975	brown	grey
ARHGAP35	0.0905641	-1.36747	0.175797	0.549125	0.211174	-3.08518	0.00290008	0.0246586	0.224909	-3.39609	0.00112361	0.0156456	-0.115086	1.7371	0.0867117	0.999975	-0.106834	1.60439	0.113073	0.999994	-0.11542	1.72077	0.0896546	0.99975	brown	blue
CPSF1	0.0847208	-1.06545	0.290286	0.676059	0.211685	-2.5758	0.0120862	0.0617053	0.227103	-2.85613	0.0056223	0.0428938	0.0254642	-0.320123	0.749817	0.999975	0.0107861	-0.134911	0.893064	0.999994	-0.175953	2.18486	0.0322065	0.99975	brown	green
TTLL4	-0.122755	1.6465	0.104088	0.447112	0.0899563	-1.16743	0.246948	0.438641	0.227135	-3.04661	0.00324931	0.0304823	-0.0688996	0.923804	0.358722	0.999975	-0.0563008	0.751066	0.455099	0.999994	-0.106975	1.41672	0.160944	0.99975	brown	grey
DNMT1	0.0401828	-0.436061	0.664118	0.896749	0.39396	-4.13653	9.55791e-05	0.00238006	0.227464	-2.46848	0.0159821	0.0821198	-0.126304	1.37014	0.174967	0.999975	-0.102783	1.10936	0.271025	0.999994	-0.0317885	0.340611	0.734404	0.99975	brown	turquoise
CBL	-0.019263	0.308806	0.758375	0.933579	0.240293	-3.72717	0.00038613	0.00645443	0.228355	-3.66085	0.000480444	0.00937254	-0.0993655	1.59234	0.115757	0.999975	-0.0644416	1.02747	0.307694	0.999994	-0.120328	1.90461	0.0608877	0.99975	brown	brown
RNFT2	-0.0207998	0.258428	0.796825	0.945127	0.437634	-5.26102	1.45431e-06	9.75005e-05	0.230731	-2.8668	0.00545546	0.0420853	-0.10457	1.29877	0.198233	0.999975	-0.0555423	0.686351	0.494731	0.999994	-0.0366116	0.449139	0.654701	0.99975	brown	brown
BRD3	0.0281186	-0.339328	0.735366	0.925869	0.355851	-4.15502	8.95768e-05	0.00226565	0.231426	-2.79287	0.00671168	0.0480571	0.00239024	-0.0288343	0.977078	0.999975	-0.0268467	0.322225	0.748231	0.999994	-0.0172757	0.205847	0.8375	0.99975	brown	red
PROSER1	0.00459819	-0.0545597	0.956643	0.989436	0.28906	-3.31856	0.00143066	0.0154696	0.233103	-2.76594	0.0072316	0.0501239	0.0405133	-0.480533	0.632328	0.999975	0.0158102	-0.18658	0.852523	0.999994	-0.0455446	0.533584	0.595298	0.99975	brown	red
WIPF2	0.0327501	-0.470045	0.639766	0.887015	0.354031	-4.91637	5.49683e-06	0.000273207	0.234459	-3.36514	0.00123787	0.0166343	0.0532575	-0.764097	0.447345	0.999975	-0.0608909	0.869201	0.38767	0.999994	0.0781811	-1.10792	0.27164	0.99975	brown	brown
USP7	0.00778802	-0.109172	0.913374	0.978339	0.391559	-5.3108	1.19674e-06	8.40847e-05	0.23784	-3.33411	0.00136339	0.0178134	-0.0621141	0.870395	0.387022	0.999975	-0.090585	1.26294	0.210749	0.999994	0.0863727	-1.19548	0.235883	0.99975	brown	blue
DAG1	0.0149313	-0.173661	0.862627	0.964201	0.267841	-3.01411	0.00357355	0.0279884	0.240415	-2.79626	0.0066487	0.0477651	0.0559947	-0.651018	0.517139	0.999975	0.0778163	-0.900154	0.371086	0.999994	-0.01216	0.139643	0.889338	0.99975	brown	grey
SH2B1	-0.0989337	0.829759	0.40946	0.763337	0.156496	-1.26995	0.208254	0.391643	0.240439	-2.01662	0.0475246	0.162411	0.0412587	-0.345911	0.730434	0.999975	-0.0518125	0.432199	0.666908	0.999994	0.0612109	-0.506895	0.613801	0.99975	brown	green
PHF7	0.0226547	-0.248745	0.804277	0.947595	0.353041	-3.75058	0.00035727	0.00611694	0.240954	-2.6457	0.0100342	0.0615834	-0.0555802	0.610039	0.543786	0.999975	-0.0393267	0.429462	0.668889	0.999994	-0.215921	2.34084	0.0220578	0.99975	brown	grey
MLLT6	0.0171774	-0.155486	0.87688	0.966193	0.357658	-3.13242	0.00252001	0.0226013	0.241515	-2.1862	0.0321042	0.126511	-0.147173	1.33169	0.187227	0.999975	-0.20487	1.8444	0.0693023	0.999994	-0.0705731	0.630748	0.530233	0.99975	brown	grey
CYFIP2	0.121777	-1.37151	0.174543	0.548202	0.244438	-2.66365	0.00956109	0.0533085	0.241929	-2.72477	0.00809837	0.053882	0.0707713	-0.796762	0.428249	0.999975	0.0533336	-0.597411	0.552137	0.999994	-0.050047	0.556532	0.5796	0.99975	brown	turquoise
MED13L	0.0438946	-0.43614	0.664061	0.896749	0.330187	-3.17434	0.0022223	0.0206532	0.244537	-2.4298	0.0176419	0.0868752	-0.106808	1.06086	0.292353	0.999975	-0.0701818	0.693554	0.490228	0.999994	-0.0365044	0.35813	0.72131	0.99975	brown	red
VPS53	0.0216916	-0.311026	0.756694	0.933088	0.378126	-5.24588	1.54291e-06	0.000101264	0.246089	-3.52863	0.00073777	0.0120237	-0.0845234	1.2115	0.229727	0.999975	-0.0798314	1.13847	0.258759	0.999994	-0.0746408	1.05672	0.294225	0.99975	brown	turquoise
LUZP1	0.165023	-1.73172	0.0876729	0.417109	0.349641	-3.55003	0.000688726	0.009405	0.246668	-2.58855	0.0116858	0.0673503	0.0174295	-0.182835	0.855449	0.999975	0.0200473	-0.209233	0.834866	0.999994	0.118844	-1.23138	0.22225	0.99975	brown	greenyellow
AP2A1	-0.0762465	0.878183	0.382811	0.746017	0.292645	-3.26125	0.00170672	0.0173157	0.248082	-2.85739	0.00560221	0.0428272	-0.0109549	0.126129	0.899987	0.999975	-0.114315	1.30952	0.194587	0.999994	-0.0962868	1.095	0.277224	0.99975	brown	turquoise
NPRL3	-0.062191	0.60809	0.545071	0.841441	0.389786	-3.68761	0.00044001	0.00693575	0.248452	-2.42937	0.0176611	0.0869202	0.0448106	-0.437989	0.662726	0.999975	-0.0674285	0.655731	0.51412	0.999994	0.0477273	-0.460774	0.646371	0.99975	brown	grey
MTATP6P1	-0.161531	1.64202	0.105015	0.448934	0.317445	-3.12225	0.00259772	0.0229714	0.2486	-2.52717	0.0137307	0.0746877	-0.100381	1.02004	0.311179	0.999975	-0.103242	1.04381	0.300119	0.999994	0.103762	-1.04146	0.3012	0.99975	brown	tan
MT-ATP6	-0.171823	1.7251	0.0888661	0.419039	0.301268	-2.9266	0.00460196	0.0332587	0.24913	-2.50132	0.0146844	0.0777331	-0.0914307	0.917627	0.361925	0.999975	-0.110625	1.10466	0.273042	0.999994	0.117267	-1.16249	0.248934	0.99975	brown	tan
ZNF574	-0.0284131	0.393277	0.695295	0.910347	0.283115	-3.79157	0.00031163	0.00553126	0.250026	-3.46079	0.00091612	0.0138878	0.0597596	-0.826853	0.411094	0.999975	0.0534302	-0.735543	0.464435	0.999994	0.0486596	-0.665012	0.5082	0.99975	brown	red
TECPR2	0.186809	-2.32934	0.0226947	0.240319	0.368253	-4.44283	3.20216e-05	0.00103675	0.250553	-3.12424	0.00258232	0.0264848	-0.0963719	1.20123	0.233659	0.999975	-0.00785425	0.097405	0.92268	0.999994	-0.0755036	0.929574	0.355746	0.99975	brown	brown
ZNF557	-0.00406252	0.0481446	0.961736	0.990637	0.403926	-4.6316	1.60172e-05	0.000650405	0.251758	-2.98364	0.00390462	0.0342427	0.0412411	-0.488567	0.626656	0.999975	0.0689321	-0.812485	0.419233	0.999994	-0.0249902	0.292418	0.770821	0.99975	brown	grey
DOP1B	0.0524762	-0.523102	0.602535	0.869352	0.211036	-2.03544	0.0455454	0.144885	0.252571	-2.51778	0.0140705	0.0759361	-0.104615	1.04246	0.300741	0.999975	-0.10041	0.995498	0.32288	0.999994	-0.223546	2.20025	0.0310487	0.99975	brown	blue
RANBP3	-0.0987859	1.08728	0.280595	0.669483	0.295342	-3.14521	0.00242543	0.021986	0.253232	-2.78725	0.00681713	0.0484317	-0.0364113	0.400613	0.68991	0.999975	-0.127297	1.3935	0.167821	0.999994	-0.000782064	0.00849906	0.993243	0.99975	brown	green
GTF3C1	0.0497785	-0.563736	0.574713	0.857116	0.287167	-3.14664	0.00241512	0.0219399	0.254152	-2.87832	0.00528048	0.0412809	0.0410855	-0.465118	0.643272	0.999975	0.0189602	-0.21356	0.831503	0.999994	-0.0873901	0.977187	0.331799	0.99975	brown	green
DIAPH1	-0.00917962	0.0965736	0.923337	0.980478	0.113901	-1.15942	0.250176	0.442403	0.254933	-2.68207	0.00909672	0.0582582	0.0609627	-0.64112	0.523512	0.999975	0.0896816	-0.938379	0.351235	0.999994	0.0579228	-0.601679	0.549307	0.99975	brown	black
ZFC3H1	0.0388707	-0.559355	0.577682	0.858851	0.284517	-3.96142	0.000175361	0.00369786	0.255024	-3.66993	0.000466343	0.00924303	-0.0654607	0.941646	0.349572	0.999975	-0.0167915	0.240324	0.810773	0.999994	-0.11633	1.65287	0.102779	0.99975	brown	blue
TBC1D9B	0.186262	-2.3211	0.0231612	0.241539	0.342972	-4.1353	9.59928e-05	0.00238685	0.255506	-3.18407	0.00215804	0.0237844	0.0357118	-0.444861	0.657776	0.999975	-0.00607608	0.075307	0.940183	0.999994	-0.181363	2.23152	0.0288099	0.99975	brown	green
SCAMP4	-0.0516125	0.576605	0.566032	0.852042	0.243761	-2.63491	0.0103286	0.0557425	0.256539	-2.86607	0.00546659	0.0421328	0.0116745	-0.130378	0.896637	0.999975	-0.00486992	0.0541112	0.956999	0.999994	-0.0776979	0.857066	0.394296	0.99975	brown	green
DDR1	0.10054	-1.13632	0.25965	0.648155	0.392175	-4.28862	5.58048e-05	0.00161253	0.257176	-2.90671	0.00487109	0.0393147	0.0380481	-0.429868	0.668596	0.999975	-0.0287485	0.32316	0.747525	0.999994	-0.0852919	0.951808	0.344428	0.99975	brown	brown
AP1B1	0.101771	-1.1886	0.238565	0.624586	0.269342	-3.04364	0.00327778	0.026787	0.257231	-3.00432	0.003677	0.0329557	0.0166549	-0.194444	0.846384	0.999975	0.0622277	-0.722831	0.472161	0.999994	-0.0336421	0.38795	0.699215	0.99975	brown	turquoise
MPHOSPH8	0.203216	-2.432	0.0175433	0.213144	0.556007	-6.4382	1.24316e-08	2.13106e-06	0.25742	-3.08076	0.00293824	0.0285938	-0.0218568	0.261477	0.794483	0.999975	-0.0854027	1.01653	0.312835	0.999994	0.0379791	-0.448779	0.65496	0.99975	brown	magenta
RBM33	-0.0804676	0.941129	0.349834	0.723283	0.249306	-2.82124	0.00620112	0.0400624	0.258453	-3.02288	0.00348323	0.0317275	-0.0346359	0.404945	0.686737	0.999975	-0.192538	2.23968	0.028249	0.999994	-0.14784	1.70727	0.0921488	0.99975	brown	red
TULP4	0.00130548	-0.016158	0.987154	0.997557	0.306591	-3.67161	0.000463774	0.00718938	0.26274	-3.25205	0.00175543	0.0209772	-0.0739888	0.915435	0.363067	0.999975	-0.0127561	0.157029	0.875668	0.999994	0.0103472	-0.126452	0.899732	0.99975	brown	red
PRR14L	0.112852	-1.997	0.049665	0.331877	0.361256	-6.18531	3.53746e-08	4.8699e-06	0.264875	-4.68727	1.30249e-05	0.00108113	-0.0451266	0.798256	0.427388	0.999975	-0.00924591	0.162727	0.871196	0.999994	-0.0168309	0.294074	0.76956	0.99975	brown	brown
CORO7	0.0051121	-0.0551832	0.956148	0.989213	0.446941	-4.66805	1.39904e-05	0.000582062	0.265067	-2.86137	0.0055398	0.0424843	-0.00239689	0.025864	0.979438	0.999975	-0.0107108	0.114993	0.908776	0.999994	-0.0209977	0.2238	0.823557	0.99975	brown	blue
SF3A2	-0.146562	1.36347	0.177049	0.550035	0.246952	-2.22288	0.0294139	0.109658	0.267267	-2.48646	0.0152594	0.0797493	0.137143	-1.27538	0.206339	0.999975	0.0522936	-0.483855	0.62998	0.999994	0.0263615	-0.242146	0.809366	0.99975	brown	grey
TADA2A	0.0917626	-1.04018	0.301791	0.687506	0.386519	-4.23927	6.65236e-05	0.0018081	0.268397	-3.0425	0.00328876	0.0307332	-0.0261873	0.296738	0.767534	0.999975	-0.00843801	0.0951314	0.924479	0.999994	0.00435505	-0.0487435	0.961261	0.99975	brown	turquoise
TSC1	0.145929	-2.18917	0.0318782	0.280121	0.27637	-4.01149	0.000147637	0.00323825	0.268523	-4.02837	0.000139279	0.00437552	-0.0201296	0.301866	0.763638	0.999975	-0.102201	1.52487	0.131739	0.999994	-0.0557507	0.825789	0.411694	0.99975	brown	red
ZMYM3	0.0677545	-0.74138	0.460912	0.795394	0.363706	-3.85062	0.000255574	0.00479782	0.269035	-2.94389	0.00437929	0.036692	-0.0291211	0.318531	0.751019	0.999975	-0.158221	1.7219	0.0894481	0.999994	-0.0208259	0.225003	0.822624	0.99975	brown	grey
SMARCC2	0.0617508	-0.93879	0.351026	0.723545	0.346567	-5.09789	2.74112e-06	0.000157876	0.269528	-4.0977	0.000109478	0.00386206	-0.0188824	0.286962	0.774978	0.999975	-0.0226484	0.342456	0.733021	0.999994	-0.0814438	1.22255	0.22555	0.99975	brown	brown
HID1	0.0318137	-0.274376	0.784593	0.9412	0.348298	-2.90644	0.00487486	0.0344586	0.269961	-2.32833	0.0227516	0.101489	-0.0132481	0.114217	0.909389	0.999975	-0.112934	0.968719	0.335979	0.999994	-0.0738993	0.629295	0.531179	0.99975	brown	blue
UBAP2	0.0495297	-0.788448	0.433063	0.7792	0.382164	-5.88619	1.20163e-07	1.30662e-05	0.270968	-4.31357	5.10431e-05	0.00245916	0.0166821	-0.265461	0.791425	0.999975	-0.0181927	0.288036	0.77416	0.999994	-0.0548117	0.861512	0.39186	0.99975	brown	turquoise
ADGRG1	0.00097399	-0.00953633	0.992418	0.998797	0.40831	-3.86807	0.000240944	0.00460485	0.271038	-2.65379	0.00981817	0.0609057	0.0730488	-0.714959	0.476982	0.999975	0.0177257	-0.172612	0.863448	0.999994	0.0701713	-0.678372	0.499744	0.99975	brown	blue
CABIN1	-0.00695682	0.0746153	0.940731	0.984254	0.349772	-3.62977	0.000531837	0.00789983	0.272821	-2.92622	0.00460702	0.0378876	0.033879	-0.363236	0.717509	0.999975	0.0445686	-0.475431	0.635941	0.999994	0.00745734	-0.0789738	0.937276	0.99975	brown	purple
MECP2	0.0275786	-0.321	0.749155	0.930426	0.292509	-3.2942	0.00154245	0.0161924	0.272864	-3.17607	0.00221069	0.0240744	-0.0907098	1.05543	0.294813	0.999975	-0.132639	1.53548	0.129116	0.999994	-0.00807543	0.092807	0.926319	0.99975	brown	blue
PHLDB1	0.00830119	-0.0898722	0.928642	0.981937	0.297029	-3.11144	0.00268274	0.0235128	0.272933	-2.95496	0.00424202	0.036046	-0.00824329	0.0892128	0.929164	0.999975	0.0467531	-0.503428	0.616224	0.999994	-0.0293447	0.313686	0.754681	0.99975	brown	black
PHF21A	0.158148	-2.16833	0.0334906	0.286124	0.406659	-5.39473	8.60166e-07	6.44477e-05	0.273222	-3.74617	0.000362536	0.00794155	0.0306976	-0.420734	0.675222	0.999975	-0.0135943	0.185379	0.853461	0.999994	-0.0537852	0.728124	0.468935	0.99975	brown	blue
TMEM94	-0.0275135	0.20681	0.836751	0.956763	0.483952	-3.5197	0.000759228	0.0100674	0.273893	-2.05881	0.0431876	0.153236	0.0779351	-0.585599	0.560005	0.999975	0.0360083	-0.269197	0.78856	0.999994	-0.0729697	0.541564	0.589817	0.99975	brown	green
MGRN1	-0.0440047	0.390384	0.697423	0.911349	0.420712	-3.61123	0.000564962	0.0082541	0.273944	-2.43033	0.0176182	0.0868752	0.0125512	-0.111306	0.911688	0.999975	-0.101344	0.894192	0.374245	0.999994	-0.124759	1.09281	0.278175	0.99975	brown	brown
SUFU	0.0155506	-0.132109	0.895272	0.973419	0.295021	-2.42503	0.0178569	0.0794456	0.274452	-2.33165	0.0225657	0.10095	-0.0125636	0.106695	0.915333	0.999975	-0.0558532	0.471928	0.638427	0.999994	-0.130222	1.09233	0.278387	0.99975	brown	green
ZCCHC14	-0.168685	1.52582	0.131505	0.49102	0.421624	-3.69002	0.000436533	0.00693575	0.275136	-2.48876	0.0151689	0.079399	-0.142178	1.28558	0.202771	0.999975	-0.338426	3.04461	0.00326849	0.999994	-0.058623	0.52357	0.60221	0.99975	brown	grey
PRPF8	0.128261	-1.45548	0.14995	0.515141	0.250902	-2.75482	0.00745685	0.045436	0.275718	-3.12886	0.00254695	0.0262585	0.0411787	-0.467117	0.641849	0.999975	-0.00535184	0.0604026	0.952005	0.999994	-0.111597	1.25039	0.215268	0.99975	brown	green
TAOK2	0.12208	-1.35321	0.180286	0.55476	0.301971	-3.23865	0.00182872	0.0181192	0.2758	-3.05722	0.00314958	0.0298778	-0.058151	0.644348	0.521429	0.999975	-0.0934931	1.03073	0.306173	0.999994	-0.133684	1.46313	0.14785	0.99975	brown	grey
DYRK1B	-0.0534012	0.463329	0.644548	0.888855	0.40112	-3.36737	0.00122929	0.0139608	0.277099	-2.40427	0.0188202	0.0906983	-0.0166425	0.144344	0.885639	0.999975	-0.0515349	0.444715	0.657881	0.999994	0.0190621	-0.163302	0.870745	0.99975	brown	brown
BAG6	-0.0127961	0.148419	0.882433	0.968389	0.248197	-2.78539	0.00685239	0.0429269	0.277255	-3.2159	0.00195978	0.0224983	0.0551235	-0.639133	0.524796	0.999975	-0.0365576	0.421728	0.6745	0.999994	0.0262309	-0.300405	0.764747	0.99975	brown	magenta
NCOA2	0.105397	-1.56215	0.122706	0.477241	0.230771	-3.30943	0.00147163	0.0157317	0.277978	-4.12016	0.000101218	0.00366309	-0.0872596	1.29285	0.20026	0.999975	-0.023417	0.345197	0.730968	0.999994	-0.0271987	0.398037	0.691799	0.99975	brown	grey
SAFB	0.140726	-2.06183	0.0428914	0.313187	0.406191	-5.75816	2.01725e-07	2.02119e-05	0.278277	-4.07722	0.000117575	0.00406306	-0.0395601	0.579394	0.56416	0.999975	-0.0271965	0.396306	0.69307	0.999994	-0.104838	1.51662	0.133809	0.99975	brown	red
AMBRA1	0.186071	-2.40448	0.0188101	0.220423	0.287953	-3.60033	0.000585324	0.00848896	0.278494	-3.5989	0.00058806	0.0106045	0.0185328	-0.239401	0.811485	0.999975	-0.0255199	0.327992	0.743884	0.999994	-0.0842032	1.07437	0.286301	0.99975	brown	grey
USF3	-0.0476897	0.50864	0.612584	0.874368	0.292871	-3.02231	0.00348903	0.0277129	0.278536	-2.97082	0.00405218	0.0349686	-0.0845536	0.901486	0.370382	0.999975	-0.18909	2.00583	0.0486908	0.999994	-0.0121271	0.12771	0.89874	0.99975	brown	red
KLC2	0.0881437	-0.971728	0.334489	0.7111	0.365088	-3.8943	0.000220461	0.00433071	0.278762	-3.07325	0.00300416	0.0289689	0.000284777	-0.00313834	0.997505	0.999975	0.00511211	-0.0560525	0.955458	0.999994	0.0394936	-0.429895	0.668576	0.99975	brown	red
PABPC1	0.0654621	-0.884618	0.379353	0.744292	0.392697	-5.13454	2.37895e-06	0.000141841	0.278987	-3.77016	0.000334726	0.00761816	0.0208016	-0.280999	0.77953	0.999975	-0.131794	1.77135	0.0808008	0.999994	-0.0311708	0.415905	0.678736	0.99975	brown	magenta
ATAT1	0.0551708	-0.595551	0.553372	0.84531	0.349929	-3.65483	0.000490014	0.00752941	0.279474	-3.01691	0.00354445	0.0321297	-0.0639227	0.689773	0.492588	0.999975	-0.18155	1.94916	0.055233	0.999994	-0.00776052	0.0827146	0.934312	0.99975	brown	blue
FSCN1	0.01031	-0.0996633	0.920893	0.979608	0.260762	-2.43893	0.0172368	0.0777474	0.280704	-2.71355	0.00835058	0.0548915	0.101145	-0.977379	0.331705	0.999975	0.00761342	-0.073198	0.941855	0.999994	-0.0562897	0.537265	0.592767	0.99975	brown	grey
OSBP2	0.0862356	-0.818208	0.41598	0.76805	0.358952	-3.29527	0.00153735	0.0161733	0.280966	-2.66588	0.00950363	0.0595137	0.0160447	-0.152177	0.87948	0.999975	-0.182432	1.72155	0.0895122	0.999994	-0.206522	1.93475	0.0570119	0.99975	brown	blue
ACACA	0.0558931	-0.785861	0.434567	0.779632	0.223249	-3.03707	0.00334157	0.0271084	0.281163	-3.95327	0.000180326	0.00512326	-0.040652	0.571361	0.569562	0.999975	-0.0540253	0.755487	0.45246	0.999994	0.00274109	-0.0380533	0.969752	0.99975	brown	grey
EIF3A	0.256228	-5.78191	1.8329e-07	0.00028215	0.462264	-10.0928	2.36334e-15	1.09919e-11	0.281672	-6.35622	1.74674e-08	1.09547e-05	0.108225	-2.44125	0.017135	0.999975	0.0596164	-1.33798	0.185177	0.999994	0.0111594	-0.248637	0.804361	0.99975	brown	grey
DLGAP1	-0.0234225	0.173474	0.862774	0.964201	0.399394	-2.86206	0.00552896	0.0373607	0.282511	-2.09241	0.0399833	0.145443	0.0651972	-0.482692	0.630801	0.999975	-0.01462	0.107693	0.914543	0.999994	-0.137403	1.0048	0.318412	0.99975	brown	red
CAPN5	0.207644	-1.80906	0.0746808	0.394129	0.414118	-3.49089	0.000832477	0.0107034	0.282946	-2.46518	0.0161181	0.082406	0.154913	-1.34916	0.181579	0.999975	0.113389	-0.982536	0.329177	0.999994	-0.0830613	0.71452	0.477252	0.99975	brown	brown
INPP5J	-0.131952	0.940627	0.35009	0.723283	0.369701	-2.54993	0.0129376	0.0644707	0.283314	-2.01966	0.0471991	0.161807	-0.180261	1.28453	0.203139	0.999975	-0.229148	1.62464	0.108677	0.999994	-0.0554168	0.390052	0.697667	0.99975	brown	blue
SNAPC4	-0.119057	0.859255	0.393096	0.7524	0.122896	-0.858183	0.393683	0.589568	0.283617	-2.04696	0.0443697	0.155902	-0.0787302	0.568	0.571829	0.999975	0.00112223	-0.00805546	0.993595	0.999994	-0.0843429	0.60103	0.549737	0.99975	brown	green
LMTK2	0.101994	-0.939417	0.350707	0.723395	0.334259	-2.97882	0.00395951	0.0301603	0.283702	-2.61311	0.010948	0.064661	-0.179304	1.65088	0.103187	0.999975	-0.134052	1.228	0.223508	0.999994	-0.0522599	0.475262	0.636061	0.99975	brown	blue
LINC00265	-0.0773149	0.615964	0.539891	0.837538	0.494765	-3.81389	0.000289183	0.00525656	0.284245	-2.26462	0.0265951	0.112331	-0.244367	1.94615	0.0556006	0.999975	-0.18275	1.44808	0.152003	0.999994	-0.227641	1.7907	0.0776095	0.99975	brown	green
SOCS7	0.0626283	-0.596597	0.552677	0.845128	0.305215	-2.81316	0.00634272	0.0407132	0.285653	-2.7212	0.00817789	0.0540923	-0.0523612	0.498611	0.619597	0.999975	-0.195063	1.8481	0.0687585	0.999994	0.0864937	-0.813535	0.418635	0.99975	brown	red
CHD2	0.0713027	-1.06376	0.291048	0.676501	0.317229	-4.57918	1.94409e-05	0.00073317	0.285909	-4.26555	6.05901e-05	0.00272256	0.0490621	-0.731686	0.466772	0.999975	-0.0855922	1.27003	0.208228	0.999994	-0.0634738	0.935003	0.352961	0.99975	brown	grey
PALM	-0.0111592	0.103735	0.917672	0.979414	0.418869	-3.76746	0.000337754	0.0058359	0.287195	-2.66981	0.00940341	0.0593462	0.0304286	-0.282759	0.778185	0.999975	-0.0732607	0.677338	0.500396	0.999994	0.00239403	-0.0219738	0.982531	0.99975	brown	blue
ZNF106	0.12343	-1.24067	0.218817	0.603436	0.264172	-2.56921	0.012298	0.0623533	0.287775	-2.89267	0.00506966	0.0403594	-0.0308997	0.310478	0.757108	0.999975	-0.0102973	0.102944	0.918298	0.999994	0.00847623	-0.0841239	0.933195	0.99975	brown	turquoise
NSD1	0.118219	-1.12195	0.26567	0.654715	0.340234	-3.12422	0.00258247	0.0229268	0.288474	-2.73782	0.00781386	0.0528192	-0.0489801	0.464673	0.643589	0.999975	-0.0334672	0.315898	0.753008	0.999994	0.0862578	-0.808289	0.421628	0.99975	brown	turquoise
PRKDC	0.179966	-3.138	0.0024784	0.0955009	0.464708	-7.84005	3.33808e-11	1.63805e-08	0.289677	-5.05109	3.28291e-06	0.000467138	-0.00671329	0.117014	0.90718	0.999975	0.0190898	-0.331059	0.741577	0.999994	-0.00507395	0.0873551	0.930636	0.99975	brown	turquoise
AAK1	0.0820963	-0.990655	0.325223	0.705032	0.558805	-6.52434	8.68733e-09	1.61651e-06	0.289686	-3.49573	0.000819721	0.0129071	-0.0545639	0.658181	0.512553	0.999975	-0.077784	0.933536	0.353712	0.999994	0.051885	-0.61819	0.538431	0.99975	brown	grey
ATF7	-0.0472866	0.543079	0.588779	0.863711	0.182978	-2.0333	0.0457671	0.145371	0.290082	-3.33163	0.0013739	0.0179093	-0.0382816	0.439497	0.661638	0.999975	-0.0399308	0.456115	0.649701	0.999994	-0.101153	1.14706	0.255213	0.99975	brown	green
PHACTR4	0.156781	-1.61744	0.110225	0.458248	0.519362	-5.18418	1.96215e-06	0.000120922	0.29018	-2.99372	0.00379208	0.0336185	-0.00049105	0.00506407	0.995974	0.999975	0.0332238	-0.340897	0.734189	0.999994	-0.0525821	0.535614	0.593902	0.99975	brown	green
CBX6	-0.148653	1.92491	0.0582528	0.356743	0.302192	-3.78615	0.000317332	0.00560896	0.290354	-3.7599	0.000346368	0.00775364	0.06167	-0.798274	0.427377	0.999975	0.0838986	-1.08052	0.283572	0.999994	0.161866	-2.06955	0.0421405	0.99975	brown	tan
SYVN1	-0.0850969	0.790041	0.432138	0.778543	0.497937	-4.47289	2.8703e-05	0.000962642	0.290581	-2.69783	0.00871585	0.0565353	-0.12733	1.1817	0.241272	0.999975	-0.166952	1.54159	0.127626	0.999994	-0.042011	0.385106	0.701312	0.99975	brown	turquoise
ADGRB2	-0.0685922	0.598276	0.551562	0.844855	0.53418	-4.50808	2.52415e-05	0.000879453	0.290877	-2.53715	0.0133775	0.0734266	-0.022899	0.199657	0.842321	0.999975	-0.103862	0.901001	0.370639	0.999994	-0.0443481	0.381929	0.703656	0.99975	brown	blue
SSH2	0.12756	-1.28637	0.202497	0.5844	0.311315	-3.0376	0.00333638	0.0271084	0.291737	-2.94209	0.00440202	0.036811	-0.136886	1.37992	0.171948	0.999975	-0.165175	1.65668	0.102004	0.999994	0.0172436	-0.171697	0.864165	0.99975	brown	blue
RUSC2	0.0819596	-0.639483	0.524569	0.829473	0.291011	-2.19693	0.0312956	0.113897	0.29208	-2.27898	0.0256817	0.110205	-0.0328284	0.256047	0.798656	0.999975	0.013682	-0.106175	0.915744	0.999994	-0.095094	0.732595	0.466221	0.99975	brown	blue
NDST1	-0.0131663	0.140576	0.888604	0.970973	0.246217	-2.54355	0.0131555	0.0652304	0.292295	-3.12088	0.00260831	0.0265743	-0.0488178	0.521032	0.603968	0.999975	-0.00576095	0.061176	0.951391	0.999994	-0.115771	1.22047	0.226331	0.99975	brown	grey
ARID3B	0.0895092	-1.14956	0.25419	0.642514	0.305984	-3.80224	0.000300705	0.00540398	0.292802	-3.76051	0.000345658	0.00775364	0.0332334	-0.426657	0.670922	0.999975	-0.0934463	1.19362	0.236606	0.999994	-0.12181	1.54463	0.126887	0.99975	brown	grey
PXN	-0.0924458	0.833607	0.407302	0.76175	0.216907	-1.89245	0.0625139	0.177139	0.294894	-2.65919	0.00967653	0.0603509	0.171295	-1.54404	0.127031	0.999975	0.166152	-1.49012	0.140629	0.999994	-0.00469792	0.0418274	0.966754	0.99975	brown	pink
PHRF1	0.0733128	-0.850959	0.397657	0.753917	0.409481	-4.59876	1.80864e-05	0.000692421	0.295827	-3.43382	0.000997768	0.0145023	0.0325018	-0.377118	0.707212	0.999975	0.00299835	-0.0346141	0.972485	0.999994	-0.202143	2.31669	0.0234146	0.99975	brown	green
TMEM8B	0.0212006	-0.283523	0.777603	0.938527	0.479214	-6.20078	3.3193e-08	4.60703e-06	0.296605	-3.96668	0.000172231	0.00500693	-0.0353	0.471905	0.638444	0.999975	-0.0831213	1.10559	0.272643	0.999994	0.0611942	-0.808034	0.421774	0.99975	brown	brown
PRR14	-0.105173	1.12212	0.265599	0.654715	0.281833	-2.90939	0.00483402	0.0342487	0.2968	-3.1667	0.00227399	0.0243551	0.0355777	-0.379446	0.705491	0.999975	-0.0464034	0.492406	0.623954	0.999994	-0.0243406	0.256415	0.798373	0.99975	brown	green
GNL3L	0.188014	-1.87855	0.0644183	0.37136	0.465086	-4.49617	2.63648e-05	0.000903715	0.297016	-2.96772	0.00408873	0.0352159	0.0128543	-0.128387	0.898206	0.999975	0.0966147	-0.960102	0.340267	0.999994	-0.0018299	0.0180526	0.985648	0.99975	brown	brown
ESF1	0.0697289	-0.797132	0.428036	0.775761	0.39316	-4.34875	4.499e-05	0.00134835	0.297285	-3.39861	0.00111477	0.0155746	0.103691	-1.18495	0.239996	0.999975	0.108677	-1.23566	0.220665	0.999994	0.115682	-1.30577	0.195853	0.99975	brown	grey
HECTD1	0.136194	-3.06148	0.00311031	0.104914	0.273414	-5.94665	9.39751e-08	1.06797e-05	0.298482	-6.7097	4.00473e-09	4.62788e-06	0.0393528	-0.884282	0.379533	0.999975	0.0262683	-0.587285	0.558878	0.999994	-0.00173593	0.038529	0.969374	0.99975	brown	brown
ZNFX1	0.0728224	-0.496901	0.620796	0.878474	0.262394	-1.73236	0.0875587	0.219474	0.298946	-2.0399	0.0450872	0.15722	0.20431	-1.39359	0.167794	0.999975	-0.0114212	0.0775098	0.938436	0.999994	-0.207165	1.39573	0.16715	0.99975	brown	cyan
DLGAP4	0.122566	-1.30664	0.195558	0.575547	0.356945	-3.68183	0.000448454	0.00700523	0.299623	-3.19426	0.00209258	0.0233731	0.0530005	-0.564815	0.573982	0.999975	0.0279306	-0.296147	0.767983	0.999994	0.0538841	-0.567189	0.572378	0.99975	brown	blue
SREBF2	-0.0996254	1.38419	0.170642	0.544351	0.0472822	-0.635626	0.527067	0.705687	0.300708	-4.17812	8.25831e-05	0.00328258	-0.0496562	0.689669	0.492654	0.999975	-0.0341426	0.471806	0.638514	0.999994	-0.03625	0.497296	0.620519	0.99975	brown	turquoise
IQCE	0.155581	-1.52532	0.131628	0.49102	0.388782	-3.688	0.000439449	0.00693575	0.302129	-2.96217	0.00415477	0.0355856	-0.0899922	0.881967	0.380775	0.999975	-0.0665233	0.648667	0.518649	0.999994	0.0319103	-0.308901	0.758303	0.99975	brown	turquoise
MDN1	0.012718	-0.171421	0.864381	0.964455	0.348166	-4.54056	2.24092e-05	0.000820751	0.304705	-4.10709	0.000105948	0.00376896	-0.0537436	0.724124	0.471372	0.999975	-0.0165322	0.221625	0.825243	0.999994	0.0214427	-0.285369	0.776194	0.99975	brown	grey
TRIP11	0.211064	-2.77471	0.00705837	0.149866	0.339105	-4.31335	5.1082e-05	0.00149908	0.305799	-4.02021	0.000143258	0.00448389	-0.0236076	0.310238	0.75729	0.999975	-0.0096357	0.125988	0.900098	0.999994	-0.0516046	0.669842	0.505135	0.99975	brown	brown
CTIF	0.0463098	-0.493115	0.623455	0.879886	0.271168	-2.79378	0.00669469	0.042173	0.305966	-3.25806	0.00172347	0.0207122	0.0297786	-0.316972	0.752197	0.999975	-0.0669462	0.708994	0.480653	0.999994	-0.0711385	0.747931	0.456976	0.99975	brown	turquoise
LINC00641	0.181052	-1.52265	0.132295	0.491332	0.367802	-2.99287	0.00380148	0.0292914	0.306535	-2.57802	0.0120156	0.0682755	-0.187756	1.57845	0.118913	0.999975	-0.0516516	0.432038	0.667025	0.999994	0.00255193	-0.0211907	0.983153	0.99975	brown	blue
CEP164	0.128884	-1.21469	0.228514	0.61439	0.504374	-4.59936	1.80464e-05	0.000692421	0.307148	-2.89484	0.00503848	0.0402058	-0.113744	1.07161	0.287531	0.999975	-0.150249	1.40838	0.163388	0.999994	-0.149034	1.38686	0.169829	0.99975	brown	grey
FOXK1	-0.0339101	0.299701	0.765282	0.936086	0.607966	-5.19895	1.85266e-06	0.000116189	0.308084	-2.72294	0.008139	0.054009	0.0137004	-0.121041	0.904001	0.999975	0.00888475	-0.078099	0.937969	0.999994	0.0273357	-0.238545	0.812147	0.99975	brown	grey
FAM193A	0.00994396	-0.107167	0.914959	0.979082	0.59085	-6.16109	3.90798e-08	5.25189e-06	0.30908	-3.33107	0.00137628	0.0179266	0.0104942	-0.113056	0.910305	0.999975	-0.0644573	0.690903	0.491883	0.999994	0.157587	-1.67689	0.0979675	0.99975	brown	red
EIF5B	0.445002	-4.95945	4.66454e-06	0.00264097	0.77564	-8.3639	3.57081e-12	3.55674e-09	0.310349	-3.45886	0.00092176	0.0139483	0.0488171	-0.543857	0.588246	0.999975	0.0466116	-0.516663	0.607	0.999994	0.15721	-1.72994	0.0879915	0.99975	brown	grey
TSC2	0.0195593	-0.20584	0.837506	0.956851	0.259989	-2.64735	0.00998989	0.0547217	0.312032	-3.28388	0.00159221	0.0196828	-0.0142424	0.149831	0.881323	0.999975	-0.0635656	0.665336	0.507994	0.999994	-0.218067	2.26594	0.02651	0.99975	brown	green
ARHGAP1	0.0623749	-0.670259	0.50487	0.820891	0.405561	-4.21664	7.20804e-05	0.00192925	0.313492	-3.36875	0.00122399	0.0165145	0.0274426	-0.294781	0.769023	0.999975	0.0978954	-1.04625	0.298998	0.999994	-0.00366803	0.0389177	0.969065	0.99975	brown	black
KDM5C	0.155555	-2.52833	0.0136892	0.194649	0.288037	-4.52976	2.33147e-05	0.000842097	0.313782	-5.10022	2.71661e-06	0.000413035	-0.0485364	0.788603	0.432973	0.999975	-0.0861	1.39185	0.168318	0.999994	-0.0934307	1.49941	0.138207	0.99975	brown	green
KPNB1	0.158624	-2.49987	0.0147396	0.199537	0.280196	-4.27256	5.90958e-05	0.00167706	0.314773	-4.96086	4.6394e-06	0.000573423	0.0133531	-0.210364	0.833987	0.999975	-0.0303841	0.476251	0.63536	0.999994	0.0552321	-0.859451	0.392988	0.99975	brown	greenyellow
PDZD4	0.247847	-1.60129	0.113759	0.46445	0.493775	-3.0867	0.00288708	0.024591	0.314936	-2.03479	0.0456123	0.158272	0.0991718	-0.640497	0.523914	0.999975	-0.0973887	0.625804	0.533453	0.999994	0.148926	-0.950032	0.345323	0.99975	brown	blue
BPTF	0.0148043	-0.173694	0.862601	0.964201	0.528651	-6.00128	7.52138e-08	8.9641e-06	0.315002	-3.6959	0.00042815	0.00880077	-0.0670168	0.785999	0.434487	0.999975	-0.128569	1.50029	0.137981	0.999994	-0.00286796	0.033224	0.973589	0.99975	brown	red
VPS13D	0.137014	-1.79027	0.0776802	0.398874	0.308947	-3.90584	0.000211985	0.00421401	0.316317	-4.13319	9.67051e-05	0.00359151	-0.0849992	1.11022	0.270656	0.999975	-0.164961	2.14375	0.0354839	0.999994	-0.113894	1.46939	0.146151	0.99975	brown	green
PCGF2	-0.098317	0.705196	0.482999	0.809036	0.426058	-2.95684	0.00421905	0.031547	0.316544	-2.27052	0.0262163	0.111419	0.0775084	-0.555739	0.580139	0.999975	-0.0773722	0.55196	0.582712	0.999994	-0.0166225	0.117723	0.90662	0.99975	brown	purple
CUX1	0.214517	-2.45505	0.0165416	0.208297	0.562512	-6.22887	2.95651e-08	4.17188e-06	0.317433	-3.63298	0.000526305	0.00995745	-0.0452551	0.517737	0.606254	0.999975	-0.0803856	0.914998	0.363294	0.999994	-0.112707	1.27359	0.206967	0.99975	brown	brown
SMC1A	0.19641	-2.76746	0.00720124	0.15057	0.518413	-7.06758	8.8834e-10	2.31419e-07	0.317525	-4.47411	2.85755e-05	0.00175419	0.0241292	-0.339861	0.734966	0.999975	0.0469204	-0.657539	0.512964	0.999994	0.00982769	-0.136726	0.891635	0.99975	brown	grey
DAB2IP	0.179577	-1.4146	0.161564	0.529878	0.586482	-4.47008	2.89988e-05	0.000968513	0.319606	-2.51773	0.0140724	0.0759361	-0.115533	0.909769	0.366027	0.999975	-0.174216	1.36493	0.17659	0.999994	0.017157	-0.133446	0.894219	0.99975	brown	grey
TAF15	0.123942	-1.24001	0.219059	0.603461	0.387138	-3.7476	0.000360828	0.00615298	0.320423	-3.20585	0.00202045	0.0229152	-0.0697911	0.697992	0.487465	0.999975	-0.107521	1.0699	0.288294	0.999994	-0.200476	1.9804	0.0515404	0.99975	brown	grey
MLLT1	-0.103485	0.778658	0.438772	0.782159	0.562955	-4.09845	0.000109195	0.00264142	0.321258	-2.41731	0.0182099	0.0886952	0.00677746	-0.0509772	0.959487	0.999975	-0.041758	0.312499	0.755578	0.999994	-0.0338397	0.251406	0.802228	0.99975	brown	green
MT-ND4	-0.113701	1.24446	0.217428	0.602177	0.383366	-4.05985	0.000124892	0.00289302	0.323901	-3.5452	0.000699514	0.0116469	-0.0172933	0.189207	0.850471	0.999975	-0.174076	1.89495	0.0621767	0.999994	0.0381605	-0.412395	0.681294	0.99975	brown	grey
PATL1	-0.0257193	0.216486	0.829231	0.954452	0.258597	-2.10607	0.0387402	0.130337	0.323913	-2.72652	0.00805955	0.0538565	0.153538	-1.2919	0.200589	0.999975	-0.101073	0.84615	0.400316	0.999994	-0.0683343	0.567924	0.571881	0.99975	brown	green
SRRM1	0.143581	-1.63959	0.10552	0.449906	0.659381	-7.2854	3.53342e-10	1.10799e-07	0.325798	-3.72047	0.00039478	0.00834557	2.51886e-05	-0.000287532	0.999771	0.999975	-0.0608268	0.690838	0.491923	0.999994	0.00433577	-0.0488863	0.961147	0.99975	brown	magenta
AMOTL1	0.128513	-1.42519	0.15849	0.525395	0.321505	-3.44976	0.00094871	0.0116903	0.325979	-3.61513	0.000557824	0.0102897	0.0619197	-0.686427	0.494683	0.999975	-0.0243328	0.268385	0.789182	0.999994	-0.0469315	0.51389	0.608927	0.99975	brown	turquoise
DPP9	0.202181	-2.43284	0.0175061	0.213133	0.285351	-3.32223	0.00141452	0.01535	0.326019	-3.92306	0.000199916	0.00548652	0.0662992	-0.797484	0.427833	0.999975	0.0500327	-0.59878	0.551228	0.999994	-0.0719729	0.855111	0.39537	0.99975	brown	grey
PLXNA1	-0.0458088	0.348065	0.728823	0.923663	0.582256	-4.28058	5.74302e-05	0.00165385	0.327949	-2.49188	0.0150473	0.0789574	-0.0717161	0.544714	0.587659	0.999975	-0.18058	1.36465	0.176677	0.999994	0.019367	-0.145297	0.884889	0.99975	brown	blue
TET3	-0.0334614	0.294646	0.769125	0.937132	0.418969	-3.56957	0.000646655	0.00903859	0.328438	-2.89214	0.00507729	0.0403746	-0.0898182	0.790608	0.431809	0.999975	-0.198055	1.73454	0.0871684	0.999994	-0.0324207	0.281877	0.778859	0.99975	brown	blue
HNRNPUL1	0.0893372	-1.4014	0.165457	0.536311	0.412785	-6.26515	2.54557e-08	3.81453e-06	0.32856	-5.15412	2.2051e-06	0.000362515	-0.00300732	0.0471574	0.96252	0.999975	-0.0336326	0.524725	0.601411	0.999994	-0.0524409	0.812234	0.419376	0.99975	brown	green
ANKRD52	-0.0483224	0.510053	0.611598	0.873616	0.282502	-2.88513	0.00517939	0.0357228	0.330027	-3.4836	0.000852046	0.013164	0.0312549	-0.329782	0.742537	0.999975	0.109022	-1.14452	0.256258	0.999994	-0.0106019	0.110493	0.912331	0.99975	brown	black
TET2	0.162237	-2.72522	0.00808844	0.156044	0.403791	-6.56276	7.40158e-09	1.44059e-06	0.332188	-5.58015	4.12067e-07	0.000109024	0.0876148	-1.4712	0.145662	0.999975	0.0976694	-1.63175	0.107167	0.999994	0.0760556	-1.26143	0.211287	0.99975	brown	red
ZBTB20	-0.0136175	0.13373	0.893995	0.972815	0.328364	-3.12006	0.00261469	0.0230321	0.33235	-3.2639	0.00169289	0.0204755	-0.0469247	0.460653	0.646458	0.999975	0.0218674	-0.213584	0.831484	0.999994	0.0361349	-0.35038	0.727093	0.99975	brown	brown
CLEC16A	0.0512971	-0.645597	0.520624	0.82878	0.453677	-5.5245	5.14389e-07	4.26968e-05	0.333636	-4.19906	7.67034e-05	0.0031453	-0.0165168	0.207795	0.835985	0.999975	-0.011386	0.142522	0.887072	0.999994	-0.107297	1.33333	0.186691	0.99975	brown	brown
TOM1L2	0.0946138	-1.0034	0.319079	0.700711	0.319798	-3.28151	0.00160385	0.0166104	0.334089	-3.54318	0.000704084	0.011677	0.0318749	-0.337917	0.736424	0.999975	0.0664091	-0.70047	0.485926	0.999994	-0.0658442	0.689476	0.492774	0.99975	brown	brown
PHF12	0.0886671	-0.958629	0.341003	0.716122	0.35476	-3.71108	0.000407231	0.00664367	0.334561	-3.61721	0.000554059	0.0102646	-0.0281756	0.30451	0.761631	0.999975	-0.140544	1.51127	0.135165	0.999994	-0.00842911	0.0899811	0.928556	0.99975	brown	red
KCNQ1OT1	-0.175647	1.18771	0.23891	0.625031	0.288436	-1.88711	0.0632392	0.178399	0.334798	-2.26393	0.0266393	0.112434	-0.0932281	0.630172	0.530608	0.999975	-0.144821	0.973964	0.333386	0.999994	0.0181776	-0.121363	0.903747	0.99975	brown	grey
CEP250	0.0550265	-0.459925	0.646977	0.889531	0.68565	-5.54493	4.74219e-07	4.0369e-05	0.334909	-2.79932	0.00659217	0.0475608	-2.69225e-05	0.000224943	0.999821	0.999975	-0.0617545	0.513364	0.609293	0.999994	-0.123845	1.02206	0.310227	0.99975	brown	blue
HDLBP	0.252164	-3.71373	0.000403677	0.0398411	0.368884	-5.25648	1.48034e-06	9.83007e-05	0.335971	-4.94812	4.87067e-06	0.000580002	0.0828763	-1.22011	0.226466	0.999975	0.0775262	-1.13558	0.259957	0.999994	-0.0641268	0.932498	0.354244	0.99975	brown	black
NDOR1	-0.0460148	0.333974	0.739385	0.927081	0.416898	-2.92767	0.00458784	0.0331849	0.336004	-2.43877	0.017244	0.0856282	-0.0967535	0.701977	0.484992	0.999975	-0.0107182	0.0773707	0.938547	0.999994	-0.123899	0.887901	0.377596	0.99975	brown	turquoise
RUSC1	-0.045671	0.457125	0.648979	0.890531	0.337293	-3.26648	0.0016796	0.0171536	0.336177	-3.36491	0.00123876	0.0166343	0.0366902	-0.367101	0.714637	0.999975	0.016757	-0.166814	0.867992	0.999994	0.150195	-1.48434	0.142152	0.99975	brown	pink
MAML3	0.304114	-2.03228	0.0458726	0.320711	0.580844	-3.75564	0.000351303	0.00602697	0.337112	-2.25285	0.0273649	0.114469	-0.0548882	0.366664	0.714962	0.999975	-0.0906105	0.602237	0.548937	0.999994	-0.201242	1.32784	0.18849	0.99975	brown	blue
FAM168A	0.0973936	-1.00024	0.320596	0.701694	0.344386	-3.42213	0.00103527	0.0123713	0.337274	-3.46391	0.000907083	0.0138084	-0.0173918	0.178549	0.858801	0.999975	-0.0421003	0.430032	0.668477	0.999994	0.0339601	-0.344369	0.731588	0.99975	brown	red
CAMTA2	-0.19717	1.91381	0.0596811	0.360146	0.376359	-3.5346	0.000723777	0.00972676	0.337831	-3.27922	0.00161519	0.0198476	0.0512462	-0.497236	0.620561	0.999975	0.0715355	-0.690595	0.492075	0.999994	0.0592957	-0.568283	0.571639	0.99975	brown	blue
ZNF8	0.203693	-1.76042	0.0826501	0.409095	0.507338	-4.24242	6.57835e-05	0.00179513	0.338091	-2.92201	0.00466277	0.0381726	-0.10029	0.866435	0.389174	0.999975	-0.136601	1.17418	0.244252	0.999994	-0.0980878	0.837019	0.405395	0.99975	brown	red
EPS15L1	0.0518125	-0.636785	0.526316	0.829828	0.267873	-3.1854	0.00214935	0.0201746	0.338627	-4.16189	8.74394e-05	0.00341155	0.0969286	-1.19083	0.237691	0.999975	0.110402	-1.34951	0.181467	0.999994	0.0273619	-0.332036	0.740842	0.99975	brown	grey
POGZ	0.0140193	-0.178662	0.858712	0.964073	0.276712	-3.41203	0.00106873	0.012617	0.339088	-4.32145	4.96216e-05	0.00242145	-0.101787	1.2967	0.19894	0.999975	-0.0441312	0.559363	0.577677	0.999994	-0.0417763	0.525675	0.600754	0.99975	brown	red
PRDM2	0.145713	-1.75537	0.0835161	0.410501	0.408874	-4.76579	9.71065e-06	0.000442017	0.339822	-4.09384	0.000110963	0.00389015	0.0340233	-0.409718	0.683248	0.999975	0.0419155	-0.502209	0.617077	0.999994	0.0450798	-0.536205	0.593495	0.99975	brown	blue
ZNF827	-0.0254402	0.280131	0.780193	0.939215	0.45557	-4.8537	6.97213e-06	0.000330698	0.340919	-3.75407	0.000353148	0.00784037	0.00459009	-0.0505246	0.959846	0.999975	-0.0600352	0.657488	0.512996	0.999994	0.0313732	-0.341098	0.734038	0.99975	brown	magenta
RGP1	0.099296	-1.09468	0.277362	0.665523	0.249213	-2.6583	0.00969976	0.0537982	0.343817	-3.79047	0.000312783	0.00735605	-0.0412409	0.45449	0.650864	0.999975	-0.0365496	0.400756	0.689805	0.999994	-0.0621824	0.676868	0.500692	0.99975	brown	green
PDCD11	0.26603	-3.82188	0.000281526	0.0338231	0.448541	-6.23485	2.8845e-08	4.17188e-06	0.34406	-4.943	4.96665e-06	0.000580002	-0.0111144	0.159615	0.873638	0.999975	0.0232658	-0.332434	0.740543	0.999994	-0.00193478	0.0274447	0.978182	0.99975	brown	turquoise
NEURL4	0.0777112	-0.829408	0.409657	0.763536	0.23981	-2.47645	0.0156582	0.0731218	0.345922	-3.6921	0.000433549	0.0088556	0.0323412	-0.34505	0.731078	0.999975	-0.0591797	0.628201	0.53189	0.999994	-0.1636	1.72405	0.089057	0.99975	brown	grey
AC108449.2	-0.0436944	0.486737	0.627946	0.88129	0.328898	-3.54493	0.000700118	0.00950229	0.346524	-3.86023	0.000247418	0.00637675	-0.0738294	0.822128	0.41376	0.999975	-0.0498894	0.552737	0.582182	0.999994	0.0345641	-0.380168	0.704957	0.99975	brown	grey
SFSWAP	0.0861656	-0.957306	0.341666	0.716532	0.289352	-3.11044	0.00269073	0.0235342	0.347867	-3.86492	0.000243526	0.00630589	-0.00609276	0.0676662	0.946242	0.999975	-0.0686207	0.758252	0.450813	0.999994	-0.0530144	0.581557	0.56271	0.99975	brown	turquoise
MINK1	0.163384	-1.6088	0.112105	0.46142	0.463056	-4.41166	3.58532e-05	0.0011369	0.34829	-3.4296	0.00101117	0.0146218	0.0213103	-0.209759	0.834457	0.999975	-0.109973	1.07701	0.285126	0.999994	-0.121353	1.17984	0.242006	0.99975	brown	turquoise
PPP1R9A	0.116025	-1.61407	0.110955	0.4597	0.387375	-5.21412	1.74635e-06	0.000111588	0.348857	-4.85322	6.98497e-06	0.000753354	-0.132892	1.84804	0.0687679	0.999975	-0.0748322	1.03539	0.304008	0.999994	-0.0761111	1.04545	0.299369	0.99975	brown	red
CRTC1	-0.0213289	0.145749	0.884533	0.969394	0.707574	-4.67829	1.34675e-05	0.000563074	0.352559	-2.40924	0.0185854	0.0897622	-0.183719	1.25497	0.213609	0.999975	-0.240651	1.63556	0.106363	0.999994	0.0220117	-0.148516	0.882357	0.99975	brown	red
SIK2	0.0663288	-0.588575	0.558017	0.847693	0.548826	-4.71208	1.18735e-05	0.000518532	0.352793	-3.13062	0.00253364	0.0261598	-0.0128437	0.113929	0.909616	0.999975	-0.0217251	0.191736	0.848497	0.999994	0.0539814	-0.472961	0.637694	0.99975	brown	brown
AHDC1	-0.202956	1.56403	0.122264	0.476588	0.666392	-4.96878	4.50112e-06	0.000230962	0.35372	-2.72592	0.00807279	0.053882	-0.10625	0.818489	0.415821	0.999975	-0.240773	1.84541	0.0691545	0.999994	-0.0894151	0.680354	0.498496	0.99975	brown	green
ANKS1A	-0.0216289	0.215988	0.829617	0.954488	0.284794	-2.75172	0.00752082	0.0456616	0.354879	-3.54395	0.000702337	0.0116709	0.0338987	-0.338392	0.736068	0.999975	0.000971924	-0.00965318	0.992325	0.999994	0.0296525	-0.292374	0.770855	0.99975	brown	grey
2020-09-09	0.109364	-1.16197	0.249145	0.638218	0.322147	-3.3117	0.00146135	0.0156859	0.355638	-3.77867	0.00032536	0.00749225	0.110033	-1.16864	0.246462	0.999975	-0.000166596	0.00176046	0.9986	0.999994	-0.0107095	0.112349	0.910864	0.99975	brown	blue
XRCC3	0.0806165	-0.646495	0.520046	0.828631	0.200576	-1.55632	0.124086	0.278379	0.356114	-2.85588	0.00562612	0.0428938	-0.186807	1.49753	0.138693	0.999975	-0.122652	0.97827	0.331267	0.999994	-0.192685	1.5257	0.131532	0.99975	brown	turquoise
MIER2	0.0713212	-0.634257	0.527955	0.83061	0.339658	-2.92258	0.00465526	0.0335579	0.356143	-3.16724	0.00227023	0.0243551	0.0156676	-0.139281	0.889623	0.999975	0.0235877	-0.208629	0.835336	0.999994	0.00523244	-0.0459444	0.963484	0.99975	brown	pink
ITSN1	0.163477	-2.29075	0.0249545	0.248771	0.43982	-5.9631	8.78872e-08	1.00554e-05	0.357336	-5.00733	3.88371e-06	0.000510812	0.0422223	-0.591428	0.556115	0.999975	0.0500092	-0.696964	0.488104	0.999994	-0.0125438	0.173552	0.862712	0.99975	brown	green
RELA	0.00606591	-0.0839574	0.933327	0.98331	0.368371	-4.93317	5.15622e-06	0.000259852	0.358056	-4.95592	4.72782e-06	0.000578441	0.0142516	-0.197182	0.844249	0.999975	-0.0375347	0.5167	0.606974	0.999994	-0.0915099	1.25058	0.215198	0.99975	brown	turquoise
DENND1A	-0.0157511	0.166092	0.868557	0.965101	0.38514	-3.92946	0.000195602	0.00399751	0.358231	-3.77755	0.000326572	0.00749291	0.042302	-0.445902	0.657027	0.999975	0.136908	-1.43585	0.155443	0.999994	0.0162434	-0.16912	0.866184	0.99975	brown	brown
MED25	-0.0229059	0.2336	0.815969	0.950831	0.398741	-3.93455	0.000192239	0.00395047	0.359884	-3.67027	0.000465814	0.00924303	-0.0481323	0.490686	0.625164	0.999975	-0.10476	1.06258	0.291577	0.999994	-0.157755	1.58851	0.11662	0.99975	brown	green
PELP1	0.0605855	-0.695601	0.488953	0.813065	0.376378	-4.18112	8.17139e-05	0.00212218	0.361466	-4.1502	9.11037e-05	0.00349059	0.0178944	-0.205376	0.837867	0.999975	-0.0479505	0.547552	0.585719	0.999994	-0.0365936	0.414837	0.679514	0.99975	brown	grey
FOXRED2	0.0683733	-0.742558	0.460202	0.795351	0.506558	-5.32293	1.1411e-06	8.15286e-05	0.361702	-3.92831	0.000196375	0.00540686	0.00176691	-0.0191823	0.98475	0.999975	0.00499968	-0.0540042	0.957084	0.999994	-0.129117	1.38455	0.170534	0.99975	brown	brown
KAT6B	0.133461	-1.45721	0.149474	0.51482	0.618994	-6.53932	8.1615e-09	1.57044e-06	0.362108	-3.95383	0.000179981	0.00512326	-0.0956593	1.04409	0.299991	0.999975	-0.0629327	0.683418	0.49657	0.999994	0.0183547	-0.197878	0.843707	0.99975	brown	brown
HERC1	0.158719	-1.6103	0.111775	0.461071	0.347344	-3.40971	0.00107653	0.012659	0.363462	-3.68765	0.000439949	0.0088898	-0.0941557	0.954923	0.342862	0.999975	-0.119113	1.20193	0.233389	0.999994	-0.0615697	0.616777	0.539357	0.99975	brown	blue
AKAP13	0.0775285	-1.02728	0.30778	0.690741	0.330557	-4.23791	6.68456e-05	0.00181394	0.363624	-4.81827	7.97073e-06	0.000808194	-0.0444738	0.589078	0.557681	0.999975	0.0345289	-0.455043	0.650469	0.999994	0.0312982	-0.409476	0.683425	0.99975	brown	green
SCAF1	-0.181744	1.25736	0.212748	0.596932	0.745289	-4.98889	4.16793e-06	0.00022124	0.364387	-2.52101	0.0139525	0.0755318	-0.159095	1.10027	0.274935	0.999975	-0.0761987	0.524314	0.601696	0.999994	0.117289	-0.801201	0.425692	0.99975	brown	grey
HECW1	0.0622934	-0.483502	0.630229	0.882832	0.318384	-2.39103	0.0194585	0.0837971	0.365475	-2.83678	0.00593684	0.0446397	-0.207486	1.60986	0.111873	0.999975	0.00145723	-0.0112493	0.991056	0.999994	0.0823653	-0.631222	0.529925	0.99975	brown	blue
MACF1	0.164775	-1.74014	0.086173	0.414828	0.630022	-6.43766	1.24594e-08	2.13106e-06	0.367965	-3.88608	0.000226693	0.00602606	0.0851833	-0.89927	0.371553	0.999975	0.150843	-1.58438	0.117558	0.999994	0.0544825	-0.568111	0.571755	0.99975	brown	pink
WDTC1	-0.0600152	0.5199	0.604753	0.870807	0.339057	-2.84189	0.0058521	0.0386481	0.368277	-3.19039	0.00211725	0.0234663	0.00612958	-0.0530799	0.957817	0.999975	-0.176483	1.52056	0.132818	0.999994	-0.0911399	0.779557	0.438246	0.99975	brown	green
MRTFA	-0.0220385	0.277681	0.782066	0.940082	0.42253	-5.15109	2.23109e-06	0.000133969	0.370698	-4.67084	1.38463e-05	0.00111424	0.103355	-1.30177	0.197208	0.999975	0.0938118	-1.17561	0.243683	0.999994	0.0398327	-0.495547	0.621746	0.99975	brown	purple
PIK3CD	0.0735364	-0.496045	0.621397	0.878595	0.38189	-2.4925	0.0150235	0.0713583	0.371558	-2.50643	0.0144914	0.0771643	0.106297	-0.71677	0.475871	0.999975	0.104111	-0.698481	0.487161	0.999994	-0.192337	1.28104	0.204354	0.99975	brown	pink
SLX4	0.0883285	-0.711959	0.478826	0.806041	0.573341	-4.47142	2.88573e-05	0.000965693	0.371923	-2.99791	0.00374619	0.0333639	-0.145606	1.17321	0.244638	0.999975	-0.239335	1.91868	0.059052	0.999994	-0.0842926	0.67085	0.504496	0.99975	brown	grey
CHD6	0.131811	-1.50484	0.136807	0.497326	0.584322	-6.45462	1.16116e-08	2.04811e-06	0.375403	-4.28597	5.63359e-05	0.00261352	-0.0445011	0.50787	0.613121	0.999975	-0.0659163	0.748471	0.456652	0.999994	-0.0159968	0.180325	0.857412	0.99975	brown	brown
MED16	-0.0461031	0.511115	0.610859	0.873326	0.418473	-4.48883	2.70813e-05	0.000917134	0.375711	-4.16536	8.63785e-05	0.00337794	-0.0116066	0.128628	0.898016	0.999975	0.0321229	-0.354196	0.724243	0.999994	-0.0532977	0.583416	0.561465	0.99975	brown	green
LINC01278	0.0377135	-0.578076	0.565045	0.851763	0.3542	-5.25307	1.50017e-06	9.92277e-05	0.375931	-5.76244	1.98272e-07	7.46074e-05	0.0559092	-0.856668	0.394515	0.999975	0.0450689	-0.687079	0.494275	0.999994	0.00799744	-0.121038	0.904004	0.99975	brown	brown
HERC2	0.0548817	-0.684412	0.495947	0.815555	0.459968	-5.55003	4.64678e-07	4.03507e-05	0.376577	-4.69628	1.25944e-05	0.00107019	-0.0582802	0.726527	0.469907	0.999975	-0.0679196	0.842416	0.402388	0.999994	-0.0117712	0.144942	0.885168	0.99975	brown	grey
RFX7	0.0605545	-0.726302	0.470045	0.799846	0.437307	-5.07499	2.99432e-06	0.000169575	0.37806	-4.53464	2.29013e-05	0.00150305	-0.096379	1.15557	0.251738	0.999975	-0.0966109	1.15249	0.252989	0.999994	-0.0854243	1.01166	0.315142	0.99975	brown	grey
ZNF462	-0.0508446	0.5168	0.606904	0.872264	0.535581	-5.26721	1.4195e-06	9.61453e-05	0.380055	-3.86309	0.000245036	0.00632498	-0.110694	1.12471	0.264504	0.999975	-0.132223	1.33668	0.1856	0.999994	0.000567218	-0.00569259	0.995474	0.99975	brown	brown
IGF1R	0.00176545	-0.0147824	0.988247	0.997568	0.435557	-3.52868	0.000737655	0.00986629	0.381563	-3.19497	0.0020881	0.0233693	0.155572	-1.30215	0.197078	0.999975	0.0659004	-0.548807	0.584862	0.999994	-0.04735	0.391464	0.696629	0.99975	brown	grey
ARHGAP17	0.306574	-3.37317	0.0012072	0.0679394	0.593827	-6.3218	2.01421e-08	3.1006e-06	0.381581	-4.19856	7.68387e-05	0.0031453	-0.0180944	0.199017	0.842819	0.999975	0.0269271	-0.294669	0.769108	0.999994	-0.0426604	0.463457	0.644457	0.99975	brown	turquoise
TRAPPC9	0.081524	-0.813788	0.418491	0.769916	0.362803	-3.50409	0.000798115	0.0103798	0.381642	-3.80972	0.000293256	0.0071244	0.00251366	-0.0250827	0.980059	0.999975	-0.0609006	0.604629	0.547356	0.999994	-0.0744259	0.733553	0.46564	0.99975	brown	grey
DOT1L	0.0760869	-0.538733	0.591759	0.864908	0.634962	-4.35	4.47883e-05	0.00134468	0.381829	-2.7036	0.00857997	0.0559002	-0.0975246	0.69027	0.492278	0.999975	-0.138964	0.978603	0.331104	0.999994	-0.0750709	0.524827	0.601341	0.99975	brown	turquoise
BDP1	0.186986	-2.3129	0.0236342	0.243171	0.592824	-7.09497	7.91272e-10	2.09353e-07	0.38203	-4.72558	1.12893e-05	0.000990478	0.0528352	-0.653299	0.515677	0.999975	-9.94175e-05	0.00122307	0.999028	0.999994	0.0714657	-0.872823	0.385706	0.99975	brown	blue
TNRC6B	0.0427861	-0.532473	0.596064	0.866075	0.495954	-5.97191	8.47866e-08	9.7666e-06	0.383601	-4.77402	9.41515e-06	0.000880811	-0.12817	1.59448	0.115276	0.999975	-0.0691593	0.856025	0.394868	0.999994	-0.0504676	0.620138	0.537155	0.99975	brown	brown
ZNF536	0.125313	-1.20656	0.231611	0.617424	0.435876	-4.06063	0.00012455	0.00288905	0.383759	-3.69507	0.000429333	0.00880133	0.0683928	-0.658271	0.512496	0.999975	0.0109229	-0.1046	0.916988	0.999994	-0.0503134	0.478319	0.633895	0.99975	brown	red
SZT2	-0.00108197	0.00754557	0.994001	0.999431	0.416512	-2.81049	0.00639022	0.0409404	0.386616	-2.69629	0.0087524	0.0567339	0.0461213	-0.321528	0.748756	0.999975	-0.0360854	0.250294	0.803084	0.999994	-0.114217	0.786479	0.434208	0.99975	brown	green
RAVER1	-0.0761585	0.563101	0.575143	0.857344	0.363913	-2.60341	0.011234	0.0586753	0.38802	-2.86901	0.00542137	0.0418796	-0.100188	0.740503	0.46144	0.999975	-0.0893686	0.657195	0.513183	0.999994	-0.128031	0.934681	0.353125	0.99975	brown	green
POLR1A	0.113068	-1.08587	0.281213	0.670485	0.35297	-3.27987	0.00161195	0.0166556	0.388458	-3.73074	0.000381578	0.00817545	-0.0841883	0.808228	0.421663	0.999975	0.0419183	-0.400393	0.690071	0.999994	0.02228	-0.21127	0.833283	0.99975	brown	brown
CHD8	0.234847	-3.26001	0.00171322	0.0814395	0.49171	-6.60421	6.22591e-09	1.27016e-06	0.389134	-5.40187	8.36274e-07	0.000181326	-0.0219245	0.304232	0.761842	0.999975	-0.000250743	0.00346182	0.997248	0.999994	-0.0141379	0.193776	0.846905	0.99975	brown	red
ARHGAP21	0.253343	-4.25992	6.18172e-05	0.0144593	0.451575	-7.34683	2.72285e-10	8.69926e-08	0.39047	-6.56584	7.3071e-09	5.62414e-06	0.0134007	-0.225247	0.822435	0.999975	-0.0179363	0.299963	0.765083	0.999994	0.0202101	-0.335538	0.73821	0.99975	brown	turquoise
AC139768.1	0.131322	-0.848575	0.398974	0.754925	0.499685	-3.1241	0.00258338	0.0229268	0.391263	-2.52832	0.0136896	0.0745355	-0.118152	0.763194	0.44788	0.999975	-0.21043	1.35238	0.18055	0.999994	-0.0848175	0.541151	0.5901	0.99975	brown	blue
CEP295	0.138516	-1.35628	0.179315	0.55327	0.467719	-4.43109	3.34159e-05	0.00107368	0.391596	-3.8344	0.000269928	0.00671556	0.0815861	-0.798556	0.427215	0.999975	0.0484183	-0.471519	0.638718	0.999994	0.118621	-1.14681	0.255316	0.99975	brown	grey
MYH10	0.319322	-3.5265	0.000742846	0.0528513	0.680652	-7.27307	3.72312e-10	1.12578e-07	0.39201	-4.32935	4.82364e-05	0.00239057	0.155079	-1.71202	0.0912649	0.999975	0.162624	-1.78624	0.0783357	0.999994	-0.0306371	0.334075	0.739309	0.99975	brown	brown
CASP8AP2	0.271417	-3.40679	0.00108647	0.065008	0.502224	-6.09935	5.03543e-08	6.45946e-06	0.393924	-4.9446	4.93639e-06	0.000580002	-0.0374168	0.469479	0.640168	0.999975	-0.00903797	0.112829	0.910485	0.999994	-0.0224593	0.278347	0.781556	0.99975	brown	turquoise
STOX2	0.0948738	-0.866437	0.389173	0.750001	0.531025	-4.69228	1.27838e-05	0.000543891	0.394714	-3.60482	0.000576851	0.0105484	-0.146305	1.33564	0.185938	0.999975	-0.246388	2.23796	0.0283664	0.999994	-0.062852	0.56675	0.572674	0.99975	brown	blue
TRRAP	-0.141322	1.4491	0.151718	0.517628	0.42495	-4.21603	7.22345e-05	0.00192925	0.395881	-4.05942	0.000125078	0.00418566	-0.0624408	0.640028	0.524218	0.999975	-0.17161	1.75014	0.08442	0.999994	-0.0381645	0.386393	0.700363	0.99975	brown	grey
C19orf54	0.093792	-0.895903	0.373337	0.740236	0.419951	-3.88125	0.000230436	0.00445386	0.396435	-3.78685	0.000316594	0.00741478	0.096658	-0.922941	0.359168	0.999975	0.00825265	-0.0784025	0.937729	0.999994	0.00409014	-0.0385757	0.969337	0.99975	brown	green
AKAP9	0.313518	-3.14554	0.00242303	0.0947555	0.67258	-6.52912	8.51598e-09	1.60223e-06	0.396637	-3.97957	0.000164776	0.00486936	-0.0728643	0.730784	0.467319	0.999975	-0.0532384	0.531251	0.596906	0.999994	0.0757981	-0.750884	0.455208	0.99975	brown	red
ANKRD17	0.183591	-3.89925	0.000216788	0.0293081	0.399059	-8.20057	7.16934e-12	6.03532e-09	0.396802	-8.4278	2.71869e-12	1.53452e-08	0.00607485	-0.128975	0.897742	0.999975	0.0290058	-0.612711	0.542028	0.999994	-0.00510522	0.10706	0.915044	0.99975	brown	red
GPATCH8	0.192189	-3.29929	0.00151844	0.0762835	0.579427	-9.62427	1.69006e-14	4.76963e-11	0.398121	-6.83466	2.37058e-09	3.12423e-06	-0.0138168	0.237104	0.81326	0.999975	-0.0604313	1.0318	0.305673	0.999994	0.00743413	-0.126009	0.900081	0.99975	brown	green
KIF1A	-0.0673338	0.569639	0.570723	0.854087	0.642574	-5.25977	1.46139e-06	9.75005e-05	0.398432	-3.37078	0.00121625	0.0164673	0.0253625	-0.214486	0.830784	0.999975	-0.0584401	0.491722	0.624435	0.999994	-0.0274576	0.229356	0.819252	0.99975	brown	blue
MT-ND5	-0.13859	1.41889	0.160312	0.52782	0.464198	-4.59833	1.81151e-05	0.000692421	0.398526	-4.08025	0.000116343	0.0040287	-0.0185497	0.189844	0.849974	0.999975	-0.0705258	0.718139	0.475031	0.999994	0.0643033	-0.650031	0.517773	0.99975	brown	brown
LZTS1	0.164072	-0.999118	0.321135	0.701833	0.296742	-1.7484	0.0847243	0.214766	0.398609	-2.4274	0.0177497	0.0872	-0.00595636	0.0362581	0.971178	0.999975	0.14949	-0.905393	0.368324	0.999994	0.0638777	-0.384073	0.702074	0.99975	brown	pink
RNF44	0.286067	-1.92088	0.0587686	0.357676	0.931702	-6.05324	6.0823e-08	7.62901e-06	0.401336	-2.69496	0.00878409	0.0569017	-0.0971291	0.651964	0.516532	0.999975	-0.272798	1.82186	0.0726939	0.999994	0.0303846	-0.20145	0.840923	0.99975	brown	brown
HIPK2	-0.0208543	0.210495	0.833885	0.955548	0.572041	-5.58663	4.01547e-07	3.59962e-05	0.402568	-4.06346	0.000123336	0.00416857	-0.0605817	0.611263	0.54298	0.999975	-0.0886488	0.889939	0.376509	0.999994	0.127719	-1.27286	0.207225	0.99975	brown	red
POM121C	-0.0859974	0.924806	0.358204	0.727825	0.559302	-5.81955	1.57423e-07	1.61554e-05	0.403168	-4.33573	4.71437e-05	0.00236179	-0.0202608	0.217803	0.828208	0.999975	-0.0758546	0.811313	0.419901	0.999994	-0.0749428	0.79575	0.428834	0.99975	brown	turquoise
CDK12	0.167428	-1.82262	0.0725783	0.389777	0.572396	-6.02895	6.71761e-08	8.2427e-06	0.403861	-4.39653	3.78703e-05	0.00209562	-0.0571872	0.622311	0.535734	0.999975	-0.0563556	0.610163	0.543704	0.999994	0.0685558	-0.736874	0.463631	0.99975	brown	brown
SORBS2	0.216254	-2.1352	0.0362013	0.296103	0.521635	-4.98332	4.25773e-06	0.000224331	0.404136	-3.99037	0.000158775	0.00477539	0.07258	-0.716363	0.47612	0.999975	0.211243	-2.07443	0.0416709	0.999994	0.124278	-1.21157	0.229699	0.99975	brown	grey
FAM222B	-0.0293771	0.371788	0.711159	0.916491	0.504116	-6.17299	3.72133e-08	5.08172e-06	0.404458	-5.11884	2.5279e-06	0.000396342	-0.0945733	1.19646	0.235504	0.999975	-0.0741135	0.932881	0.354047	0.999994	-0.014831	0.185327	0.853502	0.99975	brown	red
FRY	0.209095	-1.1621	0.249093	0.638218	0.438462	-2.35781	0.0211465	0.08861	0.406744	-2.26063	0.0268535	0.112999	-0.174681	0.970478	0.335108	0.999975	-0.0841134	0.464949	0.643393	0.999994	-0.00426011	0.0233777	0.981415	0.99975	brown	blue
CCNK	-0.032698	0.301912	0.763603	0.935092	0.37612	-3.36019	0.00125715	0.0141885	0.406922	-3.75735	0.000349319	0.00779318	-0.033936	0.313228	0.755027	0.999975	-0.0665712	0.611346	0.542926	0.999994	-0.00886399	0.0808108	0.93582	0.99975	brown	magenta
BAZ2A	0.102139	-1.33277	0.186876	0.564663	0.438628	-5.53779	4.87891e-07	4.11018e-05	0.408897	-5.33564	1.0855e-06	0.000210316	-0.0104682	0.136546	0.891777	0.999975	-0.0208183	0.270178	0.787808	0.999994	-0.0597112	0.769307	0.444266	0.99975	brown	brown
CHERP	-0.0358081	0.325222	0.745971	0.929311	0.526438	-4.62619	1.63418e-05	0.000658278	0.409639	-3.72058	0.000394634	0.00834557	-0.0244029	0.221555	0.825297	0.999975	0.0153114	-0.13831	0.890387	0.999994	-0.200778	1.80051	0.0760337	0.99975	brown	grey
SF3A1	0.0915871	-1.20475	0.232305	0.618195	0.433198	-5.51351	5.37366e-07	4.4171e-05	0.409966	-5.39289	8.66432e-07	0.000183391	0.00388808	-0.0511258	0.959369	0.999975	-0.0897536	1.17424	0.244227	0.999994	-0.0524478	0.681197	0.497966	0.99975	brown	brown
MAPK7	0.026586	-0.259634	0.795899	0.944713	0.393306	-3.71636	0.000400193	0.00658548	0.410489	-4.00886	0.000148982	0.00461192	-0.0402422	0.392854	0.695606	0.999975	-0.0590646	0.57369	0.567993	0.999994	-0.0747025	0.72032	0.473696	0.99975	brown	purple
MAP1A	0.140604	-1.25991	0.211832	0.595629	0.864075	-7.49157	1.4723e-10	5.666e-08	0.411705	-3.68927	0.000437606	0.00888036	-0.030263	0.27108	0.787117	0.999975	-0.02525	0.225033	0.822601	0.999994	0.109975	-0.973013	0.333855	0.99975	brown	pink
RIN2	0.091769	-0.865908	0.389461	0.750001	0.410557	-3.74824	0.00036006	0.00614606	0.412019	-3.8878	0.000225375	0.00600775	0.062634	-0.590782	0.556545	0.999975	-0.0370578	0.347774	0.729041	0.999994	0.0243255	-0.226631	0.821363	0.99975	brown	green
PCNT	0.191832	-1.58947	0.116404	0.467964	0.481773	-3.86234	0.000245657	0.00465813	0.415169	-3.44006	0.000978279	0.0143795	-0.0710738	0.588683	0.557945	0.999975	-0.106159	0.874839	0.384615	0.999994	-0.0683972	0.559565	0.57754	0.99975	brown	salmon
TNRC6A	0.245816	-2.85782	0.00559552	0.134867	0.462816	-5.20607	1.80198e-06	0.000113431	0.415298	-4.82829	7.67482e-06	0.000785467	-0.0533359	0.619847	0.537346	0.999975	-0.189787	2.19448	0.0314786	0.999994	-0.0716133	0.822051	0.413804	0.99975	brown	blue
SIPA1L3	0.157121	-1.02673	0.308037	0.69095	0.904699	-5.72012	2.35133e-07	2.30145e-05	0.417046	-2.72532	0.00808604	0.053882	-0.0815839	0.532929	0.595749	0.999975	-0.00600146	0.0390051	0.968996	0.999994	0.0576889	-0.372218	0.710841	0.99975	brown	grey
MYBBP1A	0.101609	-1.03785	0.302868	0.688291	0.365688	-3.61401	0.000559862	0.00821503	0.41819	-4.27156	5.93071e-05	0.00269251	0.0895902	-0.914752	0.363422	0.999975	0.101568	-1.03181	0.305668	0.999994	-0.211645	2.13448	0.0362626	0.99975	brown	grey
ARFGEF3	0.180267	-0.881355	0.381104	0.74494	0.514416	-2.43347	0.017478	0.078295	0.419265	-2.0499	0.0440741	0.155222	-0.414338	2.02502	0.0466317	0.999975	-0.35124	1.70796	0.0920184	0.999994	-0.262367	1.26656	0.209459	0.99975	brown	blue
NCAM1	0.208328	-1.10215	0.274122	0.662251	0.647721	-3.31559	0.00144389	0.015563	0.419333	-2.21853	0.0297223	0.120664	-0.210289	1.11212	0.269842	0.999975	-0.163533	0.860484	0.392423	0.999994	-0.140243	0.732583	0.466228	0.99975	brown	blue
MYO18A	0.207065	-1.43495	0.155698	0.521441	0.539504	-3.61746	0.000553624	0.00813927	0.420975	-2.91741	0.00472457	0.0384806	-0.132315	0.916599	0.36246	0.999975	-0.179323	1.23597	0.22055	0.999994	-0.161576	1.10558	0.272646	0.99975	brown	red
COL6A1	0.03626	-0.203092	0.839645	0.957978	0.472448	-2.56033	0.0125888	0.0632993	0.421677	-2.36187	0.0209334	0.096376	0.180851	-1.01258	0.314705	0.999975	0.261819	-1.45851	0.149117	0.999994	0.0340696	-0.188414	0.85109	0.99975	brown	purple
NFASC	0.170268	-1.36956	0.175148	0.548672	0.587526	-4.57248	1.99273e-05	0.000749075	0.421694	-3.39199	0.00113816	0.0157579	-0.148707	1.19569	0.2358	0.999975	-0.13708	1.09664	0.276511	0.999994	-0.0776967	0.617064	0.539169	0.99975	brown	blue
AC003665.1	-0.0228879	0.187187	0.852048	0.961529	0.296841	-2.34894	0.0216184	0.089854	0.423582	-3.46432	0.000905919	0.0138073	0.0117581	-0.0961274	0.923691	0.999975	0.0467097	-0.379943	0.705123	0.999994	-0.0154924	0.125104	0.900796	0.99975	brown	green
MEGF8	-0.0272606	0.232368	0.816921	0.950933	0.707997	-5.83915	1.45414e-07	1.51993e-05	0.425252	-3.62491	0.000540333	0.0100876	-0.112211	0.956131	0.342255	0.999975	-0.19922	1.68895	0.0956234	0.999994	-0.0837599	0.70495	0.483151	0.99975	brown	grey
PML	-0.137813	0.835726	0.406117	0.761206	0.472484	-2.77228	0.00710589	0.0439998	0.426225	-2.58477	0.0118031	0.0678187	0.193923	-1.17555	0.243706	0.999975	0.0980683	-0.591484	0.556077	0.999994	-0.165724	0.992293	0.324429	0.99975	brown	cyan
ATP1B2	0.0835441	-0.480023	0.632689	0.883862	0.72037	-4.00479	0.000151087	0.00329685	0.426455	-2.45036	0.0167413	0.0841387	0.062541	-0.359213	0.720503	0.999975	-0.0788595	0.450652	0.653615	0.999994	-0.0723078	0.410216	0.682884	0.99975	brown	red
RPRD2	0.163677	-2.0769	0.0414362	0.310661	0.392783	-4.82233	7.84967e-06	0.000369218	0.428231	-5.43394	7.36753e-07	0.000166339	-0.078172	0.991559	0.324785	0.999975	-0.0770296	0.972132	0.33429	0.999994	-0.123788	1.5509	0.125377	0.99975	brown	brown
ZNF618	0.0927657	-0.783548	0.435915	0.78034	0.456626	-3.73179	0.00038026	0.00639418	0.428884	-3.62267	0.000544296	0.0101419	-0.0608637	0.513899	0.608921	0.999975	-0.00991383	0.083284	0.93386	0.999994	0.0282438	-0.23555	0.814461	0.99975	brown	grey
ARHGAP32	0.182514	-1.57066	0.120714	0.474783	0.519044	-4.32185	4.95501e-05	0.00146173	0.430837	-3.70776	0.000411721	0.00858653	-0.164599	1.41597	0.161162	0.999975	-0.279056	2.38848	0.0195839	0.999994	-0.116648	0.991163	0.324977	0.99975	brown	blue
TMEM63B	0.00520552	-0.0525465	0.958241	0.989686	0.413601	-4.03961	0.000133964	0.00301652	0.431132	-4.35212	4.44469e-05	0.00230103	0.114453	-1.15492	0.252003	0.999975	-0.0624081	0.62656	0.53296	0.999994	0.00819963	-0.0817252	0.935096	0.99975	brown	brown
BCORL1	-0.00678066	0.0403682	0.967913	0.992171	0.843321	-4.85778	6.86534e-06	0.000327467	0.431371	-2.5682	0.0123309	0.0694062	0.0510228	-0.30365	0.762284	0.999975	-0.162013	0.95931	0.340663	0.999994	-0.125591	0.738255	0.462796	0.99975	brown	grey
SALL2	0.129765	-1.06814	0.289083	0.675487	0.395091	-3.14663	0.00241517	0.0219399	0.431592	-3.55266	0.000682909	0.0115062	-0.0837465	0.689094	0.493013	0.999975	-0.120736	0.988434	0.326302	0.999994	-0.0950725	0.772693	0.442273	0.99975	brown	brown
PRRC2C	0.120989	-1.4246	0.158661	0.525593	0.784688	-8.93965	3.07099e-13	5.7779e-10	0.432727	-5.09531	2.76855e-06	0.000414866	-0.0595322	0.700711	0.485776	0.999975	-0.0830546	0.972638	0.33404	0.999994	0.0638941	-0.742828	0.46004	0.99975	brown	grey
GATAD2B	0.0288099	-0.310977	0.756731	0.933088	0.355629	-3.71416	0.00040311	0.00661421	0.434535	-4.69052	1.2868e-05	0.00107337	-0.0342053	0.36908	0.713168	0.999975	-0.0730069	0.783775	0.435783	0.999994	-0.0131772	0.14044	0.888711	0.99975	brown	red
NOL4L	0.116581	-0.892903	0.37493	0.741503	0.581653	-4.31041	5.16224e-05	0.00150451	0.434602	-3.32874	0.00138625	0.0179873	-0.0835139	0.639407	0.524619	0.999975	-0.0693961	0.528633	0.598711	0.999994	0.0105799	-0.0800094	0.936455	0.99975	brown	red
NUP210	0.0879318	-0.776682	0.43993	0.782576	0.406761	-3.47627	0.000872152	0.0110669	0.434661	-3.83935	0.000265463	0.00664953	0.122251	-1.07942	0.284057	0.999975	0.0557209	-0.489505	0.625995	0.999994	-0.133723	1.16623	0.24743	0.99975	brown	grey
SEMA4G	0.0566381	-0.471296	0.638876	0.886485	0.655199	-5.27516	1.37604e-06	9.43338e-05	0.435625	-3.625	0.000540183	0.0100876	0.0483851	-0.402474	0.688546	0.999975	-0.213586	1.76766	0.0814199	0.999994	0.0772509	-0.634702	0.527666	0.99975	brown	blue
MAST3	-0.0455601	0.418408	0.676914	0.903441	0.58431	-5.19202	1.90324e-06	0.000118483	0.43681	-4.01161	0.000147575	0.00457673	-0.0648615	0.595448	0.55344	0.999975	-0.207963	1.89952	0.061565	0.999994	-0.163974	1.48687	0.141484	0.99975	brown	grey
ANK3	0.243942	-1.47638	0.14427	0.50939	0.711715	-4.1677	8.56706e-05	0.00219222	0.438407	-2.65339	0.00982895	0.0609057	-0.23398	1.41558	0.161278	0.999975	-0.196942	1.18548	0.239787	0.999994	-0.0302127	0.180544	0.857241	0.99975	brown	blue
ZMYND8	0.199972	-1.78842	0.07798	0.399211	0.545456	-4.71998	1.15282e-05	0.000511144	0.440888	-3.94313	0.000186685	0.00523368	-0.0738592	0.660311	0.511194	0.999975	-0.0490793	0.436559	0.663758	0.999994	0.0495373	-0.437438	0.663124	0.99975	brown	red
PTPRS	0.0983013	-0.616925	0.539261	0.83729	0.567149	-3.44388	0.00096654	0.011834	0.444137	-2.78741	0.0068142	0.0484317	0.021873	-0.137221	0.891245	0.999975	-0.0970658	0.605872	0.546535	0.999994	-0.32532	2.01588	0.0476032	0.99975	brown	grey
CNOT3	0.065344	-0.488974	0.626369	0.880979	0.52884	-3.82898	0.000274897	0.00504315	0.444411	-3.32565	0.00139963	0.0181207	-0.0312076	0.233444	0.816089	0.999975	-0.089876	0.668907	0.505727	0.999994	-0.0942125	0.696098	0.488643	0.99975	brown	green
BCOR	0.0599776	-0.639065	0.52484	0.829473	0.437787	-4.51332	2.47619e-05	0.000869209	0.444941	-4.74098	1.06571e-05	0.000959878	0.030326	-0.323007	0.747641	0.999975	0.00608509	-0.0644858	0.948765	0.999994	-0.0398424	0.419163	0.676364	0.99975	brown	green
KDM4B	0.190027	-2.04015	0.0450619	0.320637	0.603872	-6.2729	2.46538e-08	3.72734e-06	0.445563	-4.78371	9.07842e-06	0.000876741	0.111896	-1.20088	0.233794	0.999975	0.0569375	-0.607974	0.545147	0.999994	-0.130132	1.37946	0.172088	0.99975	brown	grey
GBF1	0.0388947	-0.446935	0.656284	0.894323	0.51098	-5.68115	2.75009e-07	2.61614e-05	0.44569	-5.12151	2.50191e-06	0.000395934	0.00739725	-0.0849701	0.932525	0.999975	0.0297623	-0.340144	0.734754	0.999994	-0.0137184	0.155647	0.876754	0.99975	brown	green
NUP214	0.0266981	-0.327619	0.744165	0.92904	0.463435	-5.50243	5.61567e-07	4.56192e-05	0.446098	-5.47431	6.27888e-07	0.000151886	-0.0375674	0.46083	0.646331	0.999975	-0.0559598	0.682976	0.496847	0.999994	-0.138259	1.67519	0.0983029	0.99975	brown	green
HTT	0.193542	-2.08314	0.040846	0.308632	0.527497	-5.4934	5.82062e-07	4.67112e-05	0.447026	-4.81158	8.17429e-06	0.0008239	-0.12933	1.3915	0.168424	0.999975	-0.156585	1.67624	0.0980969	0.999994	0.00866306	-0.0920654	0.926906	0.99975	brown	grey
SLC4A3	-0.107271	0.92717	0.356984	0.727495	0.400839	-3.35214	0.00128906	0.0144495	0.447814	-3.87065	0.000238855	0.00625121	0.0631243	-0.545397	0.587192	0.999975	0.0653196	-0.561514	0.576218	0.999994	-0.0801911	0.684356	0.495981	0.99975	brown	yellow
ULK1	-0.0145442	0.130812	0.896294	0.973755	0.747618	-6.50606	9.37467e-09	1.7069e-06	0.449003	-4.0385	0.000134483	0.00434579	-0.191671	1.72329	0.0891955	0.999975	-0.112286	1.00445	0.318579	0.999994	-0.0409259	0.363446	0.717354	0.99975	brown	grey
ANKRD34A	-0.0252408	0.137317	0.89117	0.971766	0.336768	-1.77268	0.0805779	0.207992	0.449394	-2.44489	0.016977	0.0847249	-0.0332756	0.180962	0.856914	0.999975	0.170871	-0.924551	0.358336	0.999994	-0.221351	1.18901	0.238405	0.99975	brown	grey
MYO5A	0.404853	-4.1318	9.71772e-05	0.0183327	0.6158	-6.08079	5.43339e-08	6.86594e-06	0.450757	-4.6004	1.79769e-05	0.00128984	-0.106099	1.08242	0.282734	0.999975	8.96649e-05	-0.000910137	0.999276	0.999994	0.110838	-1.1169	0.26781	0.99975	brown	blue
TNIK	0.26243	-2.68387	0.0090525	0.162188	0.542363	-5.36679	9.60342e-07	7.10108e-05	0.451046	-4.61295	1.71626e-05	0.00125807	0.00600868	-0.0614281	0.951191	0.999975	-0.0388413	0.395077	0.693972	0.999994	-0.0379391	0.383103	0.70279	0.99975	brown	blue
SON	0.246777	-3.91181	0.000207725	0.0290486	0.599507	-9.19488	1.03879e-13	2.51282e-10	0.451661	-7.15975	6.01665e-10	1.35549e-06	-0.0224153	0.355189	0.723502	0.999975	-0.0352358	0.555521	0.580287	0.999994	-0.0107444	0.168165	0.866932	0.99975	brown	green
MED12	-0.0621865	0.518109	0.605995	0.87182	0.379878	-3.06229	0.00310284	0.0257971	0.452039	-3.76627	0.000339092	0.00768655	-0.0305827	0.254708	0.799686	0.999975	-0.140669	1.16564	0.247666	0.999994	-0.103243	0.849312	0.398566	0.99975	brown	green
EIF4G1	0.16387	-2.36934	0.0205463	0.229604	0.513755	-7.18725	5.3556e-10	1.51144e-07	0.452393	-6.54116	8.09919e-09	5.96276e-06	0.096266	-1.39137	0.168464	0.999975	0.0998881	-1.43643	0.155279	0.999994	0.101874	-1.45436	0.150259	0.99975	brown	black
SAP130	0.219601	-2.57917	0.0119791	0.182796	0.58542	-6.65259	5.08599e-09	1.07185e-06	0.453671	-5.3284	1.11683e-06	0.000210316	0.0743485	-0.872889	0.38567	0.999975	0.0659591	-0.77048	0.443575	0.999994	-0.0833038	0.966032	0.337312	0.99975	brown	grey
TPR	0.38632	-4.767	9.66651e-06	0.00409208	0.637694	-7.61356	8.76191e-11	3.61867e-08	0.454352	-5.60662	3.70723e-07	0.000102909	-0.000715312	0.00882337	0.992985	0.999975	-0.0293867	0.360654	0.71943	0.999994	-0.0279285	0.340273	0.734657	0.99975	brown	green
ZC3H13	0.319708	-3.93072	0.000194764	0.0284031	0.827816	-9.84759	6.60381e-15	2.23645e-11	0.454373	-5.58653	4.01715e-07	0.000107972	-0.0837383	1.02916	0.306902	0.999975	-0.0612812	0.749355	0.456123	0.999994	0.0427392	-0.518831	0.605494	0.99975	brown	red
R3HDM1	0.168974	-2.08704	0.0404811	0.307399	0.499881	-5.97387	8.41123e-08	9.7553e-06	0.454451	-5.61319	3.61114e-07	0.000101912	-0.0922818	1.13938	0.25838	0.999975	-0.0683101	0.839146	0.404208	0.999994	-0.0062477	0.0761927	0.93948	0.99975	brown	blue
PHLPP1	0.0496144	-0.356537	0.722497	0.921788	0.430254	-2.99157	0.00381579	0.0293428	0.456446	-3.28018	0.00161044	0.0198036	-0.0367758	0.26418	0.792408	0.999975	-0.12956	0.925998	0.357588	0.999994	0.039244	-0.278453	0.781475	0.99975	brown	red
GOLGA3	0.312345	-3.31252	0.00145764	0.0745687	0.750487	-7.70096	6.03882e-11	2.69093e-08	0.457158	-4.84843	7.1126e-06	0.00075747	0.0146825	-0.155656	0.876746	0.999975	0.189663	-2.00055	0.0492719	0.999994	0.0363318	-0.380445	0.704752	0.99975	brown	pink
ALMS1	-0.0633564	0.650119	0.517717	0.827958	0.456223	-4.52957	2.3331e-05	0.000842097	0.458267	-4.70253	1.23045e-05	0.00105229	-0.0602815	0.618341	0.538332	0.999975	-0.194459	1.9846	0.0510598	0.999994	-0.0563578	0.571002	0.569804	0.99975	brown	grey
MBOAT7	-0.0173769	0.170947	0.864753	0.964468	0.541413	-5.1534	2.21123e-06	0.000133248	0.459538	-4.52085	2.4089e-05	0.00154507	0.0506866	-0.49845	0.61971	0.999975	0.0732092	-0.7163	0.476159	0.999994	-0.00540862	0.0525358	0.95825	0.99975	brown	black
ZNF417	0.134631	-1.32699	0.188769	0.567648	0.468507	-4.46804	2.92153e-05	0.000973825	0.460333	-4.53738	2.26719e-05	0.00149379	0.0152667	-0.150421	0.88086	0.999975	0.0348498	-0.341637	0.733635	0.999994	-0.0208707	0.203114	0.839628	0.99975	brown	grey
YLPM1	0.171766	-2.23255	0.0287384	0.265466	0.666417	-8.38084	3.32181e-12	3.51551e-09	0.461563	-5.99936	7.58036e-08	4.01119e-05	-0.0334139	0.434142	0.665503	0.999975	-0.00950377	0.122857	0.902568	0.999994	0.0194248	-0.249289	0.803858	0.99975	brown	red
MYH9	0.156491	-0.809737	0.420801	0.771124	0.540328	-2.70515	0.00854402	0.0495227	0.463003	-2.3958	0.0192266	0.0917242	0.271796	-1.40585	0.164135	0.999975	0.33585	-1.72839	0.0882708	0.999994	-0.116488	0.595139	0.553645	0.99975	brown	black
NAV2	0.0347319	-0.337985	0.736373	0.926139	0.570684	-5.37333	9.35914e-07	6.9508e-05	0.465356	-4.52862	2.34122e-05	0.00151892	0.149291	-1.45226	0.15084	0.999975	0.077249	-0.74766	0.457138	0.999994	-0.0145108	0.139426	0.889509	0.99975	brown	grey
IGF2BP2	0.270821	-1.85852	0.0672465	0.37704	0.604544	-4.01411	0.000146306	0.00321322	0.465642	-3.19556	0.00208438	0.0233431	0.0836887	-0.574106	0.567713	0.999975	0.0183334	-0.125132	0.900773	0.999994	0.0554614	-0.3758	0.708188	0.99975	brown	pink
SPTBN1	0.280393	-3.05426	0.00317708	0.105538	0.718311	-7.57057	1.05211e-10	4.23079e-08	0.465674	-5.07261	3.02192e-06	0.000437352	0.0455297	-0.495763	0.621595	0.999975	0.00959499	-0.10395	0.917503	0.999994	0.00359414	-0.0386558	0.969273	0.99975	brown	red
SRGAP3	0.213141	-1.97071	0.0526621	0.34125	0.517073	-4.62578	1.63666e-05	0.000658278	0.46583	-4.30719	5.2222e-05	0.00249795	0.0454448	-0.420031	0.675733	0.999975	0.00149849	-0.01378	0.989044	0.999994	-0.0576587	0.526383	0.600265	0.99975	brown	brown
SPTAN1	0.217651	-1.98955	0.0504987	0.334702	0.631635	-5.58649	4.01776e-07	3.59962e-05	0.467277	-4.2715	5.9319e-05	0.00269251	0.0345045	-0.315291	0.753467	0.999975	0.0185153	-0.168333	0.866801	0.999994	-0.15825	1.4283	0.157595	0.99975	brown	green
SRGAP1	0.0621522	-0.45077	0.653531	0.892919	0.459433	-3.22403	0.00191201	0.0187066	0.467359	-3.38968	0.00114641	0.0158338	0.0817513	-0.592699	0.555268	0.999975	0.106554	-0.768617	0.444674	0.999994	0.0159975	-0.114559	0.909118	0.99975	brown	pink
EVL	0.156218	-0.87962	0.382037	0.74571	0.587828	-3.20252	0.00204098	0.0194485	0.467692	-2.6335	0.0103677	0.0627208	-0.213757	1.20316	0.232915	0.999975	-0.238968	1.33827	0.185084	0.999994	-0.0977494	0.543449	0.588526	0.99975	brown	blue
PRRC2A	-0.0921502	0.817045	0.41664	0.768783	0.747453	-6.41226	1.38452e-08	2.3212e-06	0.468746	-4.15622	8.91991e-05	0.00346424	-0.00828196	0.0734047	0.941691	0.999975	-0.106574	0.939812	0.350505	0.999994	0.0836351	-0.732183	0.46647	0.99975	brown	magenta
NCOR1	0.249961	-4.68777	1.30006e-05	0.00489199	0.674002	-12.2301	3.89037e-19	6.58757e-15	0.46978	-8.81044	5.32154e-13	9.01096e-09	0.0124806	-0.233976	0.815678	0.999975	-0.0239035	0.445858	0.657059	0.999994	0.0401104	-0.742731	0.460099	0.99975	brown	brown
ZNF592	0.155967	-1.51268	0.134806	0.493667	0.454309	-4.26326	6.10854e-05	0.00170405	0.471726	-4.57523	1.97261e-05	0.00136458	-0.00602411	0.0584046	0.953591	0.999975	-0.1094	1.05529	0.294875	0.999994	-0.198437	1.90028	0.0614629	0.99975	brown	grey
ZC3H3	0.0440955	-0.436229	0.663996	0.896749	0.472738	-4.525	2.37251e-05	0.000843985	0.472932	-4.67876	1.34442e-05	0.00109976	0.0768331	-0.75982	0.449882	0.999975	0.0466582	-0.459082	0.64758	0.999994	-0.00619497	0.0605119	0.951918	0.99975	brown	grey
MPRIP	0.298972	-3.09091	0.0028513	0.100877	0.600264	-6.00448	7.4236e-08	8.9641e-06	0.47368	-4.89724	5.91152e-06	0.000662913	-0.0492625	0.509112	0.612254	0.999975	-0.0708657	0.728674	0.468601	0.999994	0.156168	-1.59415	0.115352	0.99975	brown	grey
FBXL18	-0.0119141	0.103286	0.918028	0.979414	0.632595	-5.30619	1.21855e-06	8.52635e-05	0.474949	-4.11753	0.000102153	0.00367253	-0.0515816	0.447008	0.656232	0.999975	0.03933	-0.339113	0.735527	0.999994	-0.0157638	0.134934	0.893046	0.99975	brown	turquoise
ASXL3	0.173201	-1.03228	0.305451	0.689715	0.615493	-3.54934	0.000690257	0.00941073	0.475502	-2.83407	0.00598217	0.0447816	-0.23033	1.37227	0.174306	0.999975	-0.174869	1.03658	0.303455	0.999994	0.0201159	-0.118377	0.906103	0.99975	brown	blue
MYCBP2	0.302764	-2.78341	0.0068902	0.148966	0.625243	-5.56159	4.43738e-07	3.95464e-05	0.475932	-4.37551	4.08566e-05	0.00221739	-0.127685	1.17342	0.244555	0.999975	-0.0686023	0.627268	0.532498	0.999994	0.0267297	-0.242632	0.808991	0.99975	brown	blue
ZFP41	0.147333	-1.1926	0.237003	0.623055	0.600587	-4.7038	1.22461e-05	0.000527621	0.478507	-3.87342	0.000236629	0.00622179	-0.116316	0.941188	0.349804	0.999975	-0.224132	1.80443	0.0754106	0.999994	-0.149138	1.19197	0.237249	0.99975	brown	grey
KSR1	0.163123	-1.20359	0.232752	0.61871	0.655632	-4.68058	1.33532e-05	0.000561886	0.478546	-3.53099	0.000732218	0.0119838	0.0917328	-0.676594	0.500865	0.999975	0.0137907	-0.101202	0.919676	0.999994	0.018271	-0.133108	0.894485	0.99975	brown	brown
DYNC1H1	0.125706	-1.54299	0.127286	0.485676	0.684377	-8.12789	9.77666e-12	6.62193e-09	0.478691	-5.87585	1.25315e-07	5.51131e-05	-0.0479055	0.587802	0.558533	0.999975	-0.0219374	0.267813	0.789621	0.999994	0.0253865	-0.307673	0.759233	0.99975	brown	blue
PLBD2	0.0500822	-0.438986	0.662007	0.895922	0.52674	-4.46725	2.92988e-05	0.00097469	0.47871	-4.19614	7.74981e-05	0.00315348	0.161837	-1.41803	0.160563	0.999975	0.126551	-1.10325	0.273649	0.999994	0.119331	-1.03276	0.305225	0.99975	brown	purple
HIP1	0.227177	-2.58079	0.0119279	0.182453	0.591165	-6.49792	9.69759e-09	1.74691e-06	0.480493	-5.45866	6.68072e-07	0.000157118	-0.0685123	0.778033	0.439138	0.999975	-0.0776285	0.877104	0.383393	0.999994	-0.0337958	0.379081	0.705761	0.99975	brown	grey
ADCY9	-0.0675049	0.476081	0.635481	0.885063	0.466298	-3.1819	0.00217219	0.0203664	0.481601	-3.39659	0.00112184	0.0156346	0.0681288	-0.480305	0.632489	0.999975	0.0486381	-0.341165	0.733989	0.999994	0.157886	-1.09944	0.275298	0.99975	brown	black
SHANK2	-0.024535	0.155472	0.876891	0.966193	0.639234	-3.91926	0.000202522	0.00409461	0.481635	-3.05208	0.00319754	0.0301806	-0.259664	1.64482	0.104433	0.999975	-0.341292	2.15097	0.0348884	0.999994	-0.0330586	0.206839	0.836729	0.99975	brown	blue
PCLO	0.154889	-0.825669	0.411762	0.765267	0.901778	-4.65117	1.48962e-05	0.000613717	0.482089	-2.56994	0.0122747	0.0691901	-0.201011	1.07114	0.287739	0.999975	-0.165776	0.878919	0.382414	0.999994	0.00407831	-0.0214657	0.982934	0.99975	brown	blue
PLEKHA6	0.160971	-1.34766	0.182058	0.557907	0.537831	-4.3567	4.37214e-05	0.00132676	0.482891	-4.0429	0.000132447	0.00430761	-0.0502886	0.420867	0.675125	0.999975	0.00840569	-0.0699921	0.944397	0.999994	0.08484	-0.70132	0.485399	0.99975	brown	red
MED15	0.117156	-1.42107	0.159679	0.527126	0.59648	-7.00046	1.17937e-09	2.89425e-07	0.483628	-5.86644	1.30191e-07	5.51131e-05	0.100083	-1.21354	0.228952	0.999975	0.0562906	-0.679094	0.499289	0.999994	-0.0202257	0.242235	0.809298	0.99975	brown	pink
ENAH	0.154584	-1.39651	0.166916	0.538723	0.537313	-4.69663	1.25782e-05	0.000537845	0.483763	-4.37043	4.16114e-05	0.00224397	0.0848251	-0.766033	0.4462	0.999975	0.0993325	-0.892513	0.375137	0.999994	-0.00738713	0.0658929	0.947649	0.99975	brown	purple
SEC16A	0.0183208	-0.162916	0.871048	0.965678	0.438927	-3.77649	0.000327732	0.00573294	0.485093	-4.31374	5.10107e-05	0.00245916	-0.00694191	0.0617076	0.950969	0.999975	-0.0403411	0.356786	0.722312	0.999994	-0.027625	0.242551	0.809054	0.99975	brown	green
CLIP1	0.4262	-7.41018	2.08073e-10	1.76165e-06	0.615468	-10.3538	7.96052e-16	6.73977e-12	0.486209	-8.45374	2.43383e-12	1.53452e-08	0.00811534	-0.141047	0.888233	0.999975	0.00586472	-0.101416	0.919507	0.999994	0.0253867	-0.435815	0.664295	0.99975	brown	blue
ZBTB4	0.131244	-1.54924	0.125777	0.483385	0.29081	-3.32143	0.00141801	0.0153721	0.487443	-5.75403	2.05109e-07	7.47824e-05	-0.0201104	0.237302	0.813107	0.999975	-0.042978	0.504575	0.615422	0.999994	-0.114483	1.33432	0.186369	0.99975	brown	green
KLHL29	-0.169473	0.950896	0.344888	0.719387	0.527164	-2.8619	0.0055314	0.0373607	0.491871	-2.7599	0.00735321	0.0506558	-0.352635	1.97787	0.0518305	0.999975	-0.372241	2.07729	0.0413985	0.999994	0.0572766	-0.317314	0.751938	0.99975	brown	grey
PEAK1	0.237902	-1.8261	0.0720451	0.389673	0.568543	-4.22249	7.06029e-05	0.00190369	0.493954	-3.79162	0.000311585	0.00734456	0.0299341	-0.229686	0.818997	0.999975	0.105834	-0.807966	0.421813	0.999994	0.180744	-1.36985	0.175057	0.99975	brown	grey
ABCA3	0.151118	-1.4752	0.144586	0.509737	0.599493	-5.66235	2.96559e-07	2.75914e-05	0.494503	-4.82742	7.7002e-06	0.000785467	0.0440807	-0.430155	0.668387	0.999975	0.041039	-0.39845	0.691496	0.999994	-0.168602	1.6251	0.108579	0.99975	brown	grey
MTOR	0.235014	-2.61816	0.0108016	0.176378	0.355841	-3.83562	0.000268825	0.00497488	0.49588	-5.52445	5.1449e-07	0.000131998	-0.0849345	0.94586	0.347432	0.999975	-0.0539442	0.597706	0.551941	0.999994	-0.0100065	0.110069	0.912665	0.99975	brown	brown
DAGLA	-0.0159926	0.113403	0.910031	0.976868	0.550378	-3.77611	0.000328146	0.00573395	0.496333	-3.51957	0.000759527	0.0122626	-0.0403644	0.286118	0.775622	0.999975	-0.222198	1.56707	0.121552	0.999994	-0.156894	1.09848	0.275711	0.99975	brown	red
BOD1L1	0.424519	-4.66592	1.41019e-05	0.00503809	0.756511	-8.04513	1.39178e-11	8.72855e-09	0.496851	-5.46106	6.6175e-07	0.000157118	-0.111457	1.22458	0.224785	0.999975	-0.14016	1.53216	0.129932	0.999994	0.0479346	-0.5202	0.604545	0.99975	brown	blue
ZNF710-AS1	0.254279	-2.02237	0.0469115	0.323989	0.990793	-7.62452	8.36264e-11	3.54012e-08	0.500447	-3.98035	0.000164339	0.00486496	0.0123515	-0.0981999	0.922051	0.999975	0.0420818	-0.33288	0.740207	0.999994	-0.0404676	0.31779	0.751578	0.99975	brown	brown
PROSER3	0.10744	-0.776475	0.440052	0.782591	0.634211	-4.4348	3.2968e-05	0.00106224	0.501082	-3.62145	0.000546471	0.0101574	-0.0070975	0.0512754	0.95925	0.999975	-0.0310844	0.223433	0.823841	0.999994	0.0805935	-0.575101	0.567043	0.99975	brown	green
TENM4	0.0843576	-0.50841	0.612744	0.874368	0.617391	-3.60021	0.000585549	0.00848896	0.501094	-3.02009	0.00351176	0.0318674	-0.0115285	0.0694549	0.944823	0.999975	0.000908063	-0.00544312	0.995672	0.999994	-0.0295552	0.175875	0.860893	0.99975	brown	red
MAP1B	0.184763	-1.71779	0.0902009	0.421935	0.841035	-7.56565	1.07438e-10	4.23079e-08	0.50138	-4.66157	1.43318e-05	0.00114472	-0.0305095	0.283551	0.777581	0.999975	-0.0329596	0.304775	0.761431	0.999994	0.0726747	-0.667144	0.506846	0.99975	brown	blue
CASZ1	-0.0838622	0.461985	0.645507	0.888967	0.699265	-3.72719	0.000386103	0.00645443	0.503132	-2.77175	0.00711634	0.0495889	-0.185193	1.01983	0.311276	0.999975	-0.285222	1.56274	0.122567	0.999994	-0.0932834	0.507397	0.613451	0.99975	brown	grey
EPB41L1	0.308349	-2.75751	0.00740192	0.151816	0.795622	-6.88427	1.92416e-09	4.52524e-07	0.50439	-4.51077	2.49943e-05	0.00159709	-0.114937	1.02748	0.307685	0.999975	-0.142256	1.26528	0.209913	0.999994	0.0398963	-0.35228	0.725673	0.99975	brown	blue
ERC1	0.334503	-4.51786	2.43544e-05	0.00749805	0.625924	-8.17958	7.84131e-12	6.03532e-09	0.505821	-6.83186	2.39857e-09	3.12423e-06	-0.0193602	0.261387	0.794552	0.999975	0.0468906	-0.629882	0.530797	0.999994	0.00597578	-0.0796907	0.936708	0.99975	brown	salmon
MIR600HG	0.134801	-0.808221	0.421667	0.771484	0.661415	-3.83697	0.000267599	0.00496847	0.507886	-3.04519	0.00326293	0.0305762	-0.152543	0.914262	0.363678	0.999975	-0.302007	1.80092	0.0759675	0.999994	-0.204861	1.21277	0.229244	0.99975	brown	blue
ONECUT2	0.191452	-0.789161	0.432649	0.778952	0.732523	-2.92149	0.00466979	0.0336197	0.508096	-2.09441	0.0397991	0.145085	-0.399178	1.6448	0.104439	0.999975	-0.440516	1.80596	0.0751689	0.999994	-0.215146	0.875627	0.38419	0.99975	brown	blue
EP400	-0.053298	0.463098	0.644712	0.888855	0.713551	-5.9988	7.59779e-08	8.9641e-06	0.508196	-4.41575	3.5327e-05	0.00202092	-0.0579997	0.503766	0.615988	0.999975	0.00957412	-0.0827375	0.934293	0.999994	0.0110449	-0.0947556	0.924776	0.99975	brown	blue
TSPOAP1	0.21128	-1.72374	0.0891132	0.419519	0.636479	-5.0243	3.63891e-06	0.000198127	0.509255	-4.15489	8.9616e-05	0.00346869	0.00428137	-0.0349171	0.972244	0.999975	-0.270814	2.19749	0.031254	0.999994	-0.265968	2.14252	0.0355866	0.99975	brown	red
PDE4A	0.176385	-0.947714	0.346494	0.720874	0.685905	-3.56579	0.000654588	0.00911097	0.510878	-2.745	0.00766124	0.0522269	-0.0282585	0.151777	0.879794	0.999975	-0.160713	0.858829	0.393329	0.999994	-0.125449	0.665523	0.507875	0.99975	brown	blue
UBR4	0.140814	-1.70777	0.0920548	0.42573	0.600791	-7.04994	9.5707e-10	2.45546e-07	0.511278	-6.20086	3.31813e-08	1.93745e-05	-0.0367358	0.445365	0.657413	0.999975	-0.113594	1.37019	0.174951	0.999994	-0.0110717	0.13258	0.894901	0.99975	brown	grey
AGAP1	0.224649	-2.03771	0.0453118	0.320637	0.711744	-6.24654	2.74873e-08	4.01243e-06	0.511699	-4.64156	1.5437e-05	0.00120458	-0.132343	1.19999	0.234136	0.999975	-0.208342	1.87956	0.0642779	0.999994	0.0137264	-0.122935	0.902506	0.99975	brown	salmon
IRS2	-0.0211322	0.162179	0.871626	0.965678	0.715352	-5.31187	1.19168e-06	8.40783e-05	0.51246	-3.93297	0.000193277	0.00538282	0.194184	-1.48972	0.140732	0.999975	0.04484	-0.342261	0.733167	0.999994	0.172582	-1.30776	0.19518	0.99975	brown	brown
CHD7	0.206786	-1.98816	0.0506559	0.335194	0.768779	-7.15171	6.22465e-10	1.7279e-07	0.512812	-4.9306	5.20701e-06	0.000599502	-0.00957217	0.0919989	0.926958	0.999975	-0.0176983	0.16924	0.86609	0.999994	-0.0558388	0.530088	0.597707	0.99975	brown	red
ZNF142	-0.0285699	0.226393	0.821547	0.951952	0.707976	-5.42812	7.53894e-07	5.82908e-05	0.513106	-4.06603	0.000122237	0.00416857	-0.129329	1.02445	0.309108	0.999975	-0.102247	0.805832	0.423034	0.999994	-0.100716	0.788011	0.433317	0.99975	brown	grey
GSE1	0.0910409	-0.537756	0.59243	0.865035	0.702973	-4.01758	0.000144565	0.00319572	0.516186	-3.04906	0.00322606	0.0303482	-0.186218	1.09954	0.275251	0.999975	-0.242085	1.42219	0.159356	0.999994	-0.108824	0.634677	0.527682	0.99975	brown	blue
ZNF423	0.0705766	-0.46399	0.644077	0.888732	0.827218	-5.26193	1.44912e-06	9.75005e-05	0.517988	-3.40547	0.00109098	0.0153789	-0.126541	0.831611	0.408421	0.999975	-0.189789	1.24097	0.218708	0.999994	-0.129503	0.840639	0.403376	0.99975	brown	turquoise
CREBBP	0.0773857	-0.649506	0.51811	0.827958	0.905806	-7.35589	2.62011e-10	8.53198e-08	0.518827	-4.35467	4.40412e-05	0.00230103	-0.186555	1.5652	0.121988	0.999975	-0.161709	1.34989	0.181345	0.999994	0.0436397	-0.361647	0.718691	0.99975	brown	brown
ANK2	0.34806	-3.81447	0.000288627	0.0342441	0.844825	-8.95825	2.83739e-13	5.7779e-10	0.519658	-5.69518	2.59935e-07	8.0895e-05	-0.0928861	1.01759	0.312335	0.999975	-0.0894368	0.974848	0.33295	0.999994	-0.144781	1.56665	0.121649	0.99975	brown	turquoise
KMT2A	0.101245	-0.972676	0.334022	0.710819	0.717707	-6.67145	4.70011e-09	1.02035e-06	0.523278	-5.02734	3.59673e-06	0.000487227	-0.0214004	0.205522	0.837753	0.999975	-0.0844519	0.80695	0.422394	0.999994	0.0149174	-0.141505	0.887872	0.99975	brown	blue
ARHGAP33	-0.0483214	0.315378	0.753401	0.931947	0.544463	-3.43825	0.000983889	0.0119625	0.524292	-3.42197	0.00103579	0.0148734	-0.102347	0.667743	0.506466	0.999975	-0.365514	2.37267	0.0203759	0.999994	-0.158885	1.0239	0.309364	0.99975	brown	blue
DST	0.322066	-3.62488	0.000540397	0.044738	0.771024	-8.39641	3.10828e-12	3.50884e-09	0.525953	-5.91978	1.04835e-07	5.07192e-05	0.0429192	-0.482882	0.630667	0.999975	0.116271	-1.30155	0.197284	0.999994	0.0116935	-0.12995	0.896974	0.99975	brown	brown
HCFC1	-0.0428786	0.344055	0.731823	0.924471	0.830487	-6.4476	1.19552e-08	2.08698e-06	0.526886	-4.22781	6.92838e-05	0.00295512	-0.114021	0.914562	0.363522	0.999975	-0.126427	1.00895	0.31643	0.999994	-0.043182	0.342115	0.733277	0.99975	brown	turquoise
BTBD2	0.0375263	-0.318257	0.751226	0.930814	0.53392	-4.38122	4.00239e-05	0.00123447	0.528607	-4.48317	2.76471e-05	0.00173388	-0.265543	2.25122	0.0274729	0.999975	-0.230931	1.94789	0.0553878	0.999994	0.00878489	-0.073563	0.941565	0.99975	brown	grey
TRERF1	0.231307	-1.90459	0.0608908	0.363449	0.614157	-4.89295	6.00862e-06	0.000291217	0.531167	-4.37376	4.1115e-05	0.00222428	-0.236312	1.9451	0.0557298	0.999975	-0.335657	2.74885	0.00758051	0.999994	-0.249303	2.02685	0.0464394	0.99975	brown	red
PLXNB1	0.109079	-0.819705	0.415132	0.767572	0.431232	-3.13548	0.00249709	0.0224868	0.53149	-3.99412	0.000156738	0.00476428	-0.041406	0.311043	0.756681	0.999975	-0.0943954	0.705519	0.482799	0.999994	-0.0529019	0.392526	0.695847	0.99975	brown	brown
CACNA1C	-0.049853	0.349353	0.72786	0.923144	0.574236	-3.89351	0.000221051	0.00433727	0.531523	-3.72482	0.000389135	0.00828198	0.0932565	-0.653271	0.515694	0.999975	0.0685943	-0.478082	0.634063	0.999994	-0.10738	0.742983	0.459947	0.99975	brown	turquoise
LINC01963	0.285259	-2.59293	0.0115508	0.182064	0.710701	-6.25052	2.70392e-08	3.98135e-06	0.534961	-4.86278	6.73679e-06	0.000731244	-0.138296	1.25662	0.213018	0.999975	-0.00627231	0.056705	0.95494	0.999994	0.165906	-1.489	0.140922	0.99975	brown	grey
FASN	-0.360148	2.27428	0.0259776	0.253451	0.512617	-3.13209	0.00252254	0.022612	0.535662	-3.38271	0.00117173	0.0160655	-0.0531613	0.335583	0.738176	0.999975	-0.118907	0.746812	0.457646	0.999994	0.0854444	-0.532756	0.595869	0.99975	brown	grey
TNKS1BP1	0.150911	-1.21036	0.23016	0.616075	0.518356	-4.02253	0.000142115	0.00314979	0.539748	-4.32908	4.8283e-05	0.00239057	0.140947	-1.13003	0.262271	0.999975	0.0739724	-0.590073	0.557018	0.999994	-0.068339	0.541182	0.590078	0.99975	brown	turquoise
MARK4	0.144917	-1.07224	0.287247	0.674247	0.754911	-5.40438	8.28022e-07	6.25933e-05	0.541532	-4.00689	0.000149995	0.00462636	-0.0995027	0.735951	0.464188	0.999975	-0.193904	1.42692	0.157991	0.999994	0.0135419	-0.0989313	0.921472	0.99975	brown	blue
AC011008.2	-0.0840567	0.345395	0.73082	0.923974	0.634376	-2.52213	0.0139119	0.0675763	0.543567	-2.23361	0.0286652	0.117947	-0.00604875	0.0248457	0.980248	0.999975	0.200779	-0.820546	0.414655	0.999994	0.363868	-1.47628	0.144297	0.99975	brown	blue
CLUH	0.0757617	-0.693452	0.490292	0.814172	0.592521	-5.24745	1.53349e-06	0.000101037	0.544253	-4.98171	4.28416e-06	0.000549573	0.0960975	-0.879265	0.382228	0.999975	0.123643	-1.12559	0.264137	0.999994	-0.100805	0.911021	0.365371	0.99975	brown	green
AKAP12	0.302791	-2.07346	0.0417645	0.311109	0.824445	-5.4625	6.57966e-07	5.20623e-05	0.545372	-3.7347	0.000376611	0.00812376	0.194624	-1.33226	0.187041	0.999975	0.160666	-1.09425	0.277547	0.999994	-0.0420209	0.284118	0.777148	0.99975	brown	grey
TMEM63C	0.178782	-0.984382	0.328275	0.707301	0.582801	-3.10483	0.00273595	0.0238189	0.546221	-3.00759	0.00364211	0.0328042	-0.108875	0.599254	0.550914	0.999975	-0.205666	1.12628	0.263846	0.999994	-0.257208	1.39832	0.166377	0.99975	brown	blue
POM121	0.108589	-1.06072	0.292416	0.677822	0.769654	-7.27425	3.70447e-10	1.12578e-07	0.549378	-5.36657	9.61157e-07	0.000193753	0.00955193	-0.0932712	0.925951	0.999975	-0.0214111	0.208015	0.835813	0.999994	-0.0795703	0.767445	0.445366	0.99975	brown	grey
AGAP2	0.102808	-0.510568	0.61124	0.873465	0.874728	-4.20317	7.55963e-05	0.00199699	0.551991	-2.74138	0.00773786	0.0525151	-0.29156	1.44743	0.152185	0.999975	-0.0523183	0.258417	0.796833	0.999994	-0.00121525	0.00595901	0.995262	0.99975	brown	blue
SETD1A	0.00801461	-0.0488681	0.961162	0.990396	0.8433	-4.97511	4.39364e-06	0.000229622	0.557683	-3.40048	0.00110823	0.0155474	-0.043092	0.262652	0.793581	0.999975	-0.0501722	0.304262	0.76182	0.999994	0.124843	-0.751603	0.454777	0.99975	brown	grey
SMARCA4	0.178692	-1.84132	0.0697574	0.383881	0.885112	-8.82472	5.00765e-13	8.47946e-10	0.55785	-5.74848	2.09753e-07	7.47824e-05	-0.00994459	0.102436	0.9187	0.999975	0.0132456	-0.135749	0.892404	0.999994	0.0388334	-0.395105	0.693952	0.99975	brown	red
PCNX3	0.177231	-1.71227	0.0912174	0.424086	0.58899	-5.5058	5.54103e-07	4.53267e-05	0.559732	-5.40786	8.16742e-07	0.000179609	-0.101486	0.980123	0.330358	0.999975	-0.102207	0.982098	0.329391	0.999994	-0.112079	1.06915	0.288627	0.99975	brown	green
ZNF629	0.248993	-2.93359	0.00451069	0.12143	0.725684	-8.27253	5.27354e-12	4.96094e-09	0.560479	-6.60363	6.2408e-09	5.28377e-06	-0.030898	0.363903	0.717014	0.999975	0.0164702	-0.192998	0.847512	0.999994	-0.0976133	1.13554	0.259972	0.99975	brown	grey
SETBP1	0.130217	-1.31228	0.193658	0.573045	0.719331	-7.01401	1.1138e-09	2.77352e-07	0.561049	-5.65421	3.0641e-07	8.94558e-05	-0.0144388	0.145456	0.884763	0.999975	-0.0222512	0.223026	0.824157	0.999994	0.0929692	-0.925082	0.358061	0.99975	brown	grey
SRCAP	0.0331395	-0.22868	0.819776	0.951814	0.613052	-4.09315	0.000111231	0.0026716	0.561573	-3.87525	0.000235167	0.00619298	-0.104265	0.719222	0.474368	0.999975	-0.216481	1.48574	0.141781	0.999994	-0.133782	0.911508	0.365117	0.99975	brown	green
SPECC1L	0.30724	-3.19379	0.00209559	0.0884904	0.714841	-7.18979	5.29826e-10	1.51144e-07	0.566186	-5.88571	1.20401e-07	5.51131e-05	0.0333116	-0.346151	0.730254	0.999975	0.0154203	-0.159428	0.873785	0.999994	0.126824	-1.3017	0.197231	0.99975	brown	grey
PIANP	0.0716349	-0.673986	0.502512	0.819255	0.684356	-6.22998	2.94304e-08	4.17188e-06	0.566293	-5.32817	1.11784e-06	0.000210316	0.0538525	-0.506493	0.614082	0.999975	0.0142924	-0.133744	0.893984	0.999994	0.0365646	-0.339679	0.735103	0.99975	brown	brown
RIPOR1	0.075025	-0.765477	0.446529	0.787033	0.696351	-6.87436	2.00613e-09	4.65339e-07	0.568227	-5.79774	1.71933e-07	6.93178e-05	0.078681	-0.802486	0.424954	0.999975	-0.0716538	0.727122	0.469545	0.999994	-0.00876286	0.0882782	0.929904	0.99975	brown	grey
NCKAP5L	0.0869338	-0.907029	0.367464	0.733845	0.717584	-7.24407	4.20998e-10	1.25066e-07	0.571295	-5.96078	8.87204e-08	4.41854e-05	-0.0815604	0.850654	0.397825	0.999975	-0.0958275	0.994407	0.323407	0.999994	-0.0852497	0.878226	0.382788	0.99975	brown	grey
INTS1	0.131745	-1.09074	0.279081	0.667809	0.588124	-4.71121	1.19122e-05	0.000518532	0.571877	-4.73477	1.09077e-05	0.000975145	0.0561229	-0.46448	0.643727	0.999975	0.0292897	-0.241181	0.810111	0.999994	-0.170195	1.39128	0.168492	0.99975	brown	green
NLGN2	-0.0619186	0.539375	0.591318	0.864737	0.855125	-7.20737	4.91809e-10	1.43583e-07	0.573369	-4.99476	4.07537e-06	0.000526781	-0.0540931	0.471034	0.639062	0.999975	-0.132629	1.14908	0.254384	0.999994	0.0136948	-0.11779	0.906567	0.99975	brown	magenta
ZFHX2	-0.149711	0.895543	0.373528	0.740452	0.716428	-4.14652	9.22902e-05	0.00231862	0.574541	-3.43688	0.000988161	0.0144495	-0.145268	0.868652	0.387969	0.999975	-0.22543	1.34118	0.184143	0.999994	0.0279509	-0.165086	0.869346	0.99975	brown	blue
FBXL16	0.26346	-1.32374	0.189842	0.568653	0.750357	-3.64782	0.000501379	0.00762927	0.574791	-2.88808	0.00513628	0.0406414	-0.352192	1.76893	0.0812072	0.999975	-0.610874	3.05268	0.00319187	0.999994	-0.190424	0.944693	0.348024	0.99975	brown	blue
PLEKHG2	-0.0661417	0.548457	0.585101	0.862035	0.581317	-4.66399	1.42034e-05	0.000589475	0.577938	-4.79246	8.78454e-06	0.000857518	0.0378513	-0.313754	0.754629	0.999975	0.0322709	-0.266146	0.790899	0.999994	-0.0968658	0.793083	0.430376	0.99975	brown	brown
IQSEC1	0.166789	-1.622	0.109241	0.456104	0.784737	-7.38391	2.32626e-10	7.72365e-08	0.583335	-5.67301	2.84145e-07	8.59185e-05	-0.0300451	0.292078	0.77108	0.999975	-0.154358	1.49299	0.139878	0.999994	-0.100649	0.966442	0.337108	0.99975	brown	red
CLIP3	0.112814	-1.26808	0.208916	0.592685	0.778135	-8.46285	2.34107e-12	3.04934e-09	0.584923	-6.57497	7.03421e-09	5.62414e-06	0.00756484	-0.0850013	0.9325	0.999975	-0.0872547	0.975471	0.332643	0.999994	-0.0743577	0.825261	0.411992	0.99975	brown	red
CUX2	-0.0946094	0.385606	0.700943	0.912865	0.726871	-2.86645	0.00546075	0.0370609	0.58498	-2.3843	0.0197904	0.0931809	-0.342707	1.39629	0.166985	0.999975	-0.459054	1.86087	0.0669097	0.999994	-0.0795882	0.320287	0.749693	0.99975	brown	blue
CIZ1	0.148103	-1.67669	0.0980074	0.438403	0.635965	-6.96624	1.36242e-09	3.2957e-07	0.586235	-6.63697	5.42938e-09	5.16086e-06	-0.0210118	0.237789	0.812731	0.999975	-0.0351165	0.395403	0.693733	0.999994	-0.0099071	0.110743	0.912133	0.99975	brown	turquoise
ARID1A	0.0791509	-0.742022	0.460525	0.795394	0.817494	-7.4152	2.03679e-10	7.18487e-08	0.586375	-5.49727	5.73204e-07	0.000142736	-0.0445191	0.417204	0.67779	0.999975	-0.0915297	0.853423	0.396299	0.999994	-0.0630471	0.583589	0.561349	0.99975	brown	red
ATXN2L	0.0380173	-0.350555	0.726962	0.922856	0.555076	-4.95228	4.79396e-06	0.000243772	0.587543	-5.41782	7.85218e-07	0.000174949	0.176388	-1.62586	0.108416	0.999975	0.00231397	-0.0212214	0.983129	0.999994	-0.0824547	0.750709	0.455312	0.99975	brown	yellow
KMT2C	0.210587	-2.61913	0.0107737	0.176091	0.659048	-7.93084	2.26639e-11	1.23796e-08	0.58953	-7.33232	2.89579e-10	1.22586e-06	0.00471253	-0.0585895	0.953444	0.999975	-0.0323584	0.40027	0.690161	0.999994	0.013051	-0.160269	0.873125	0.99975	brown	red
ATN1	-0.0547259	0.378178	0.706428	0.915015	0.967533	-6.46915	1.09311e-08	1.94837e-06	0.596375	-4.12129	0.000100818	0.00366309	-0.0613154	0.423559	0.673169	0.999975	-0.130762	0.898725	0.371842	0.999994	0.094881	-0.647387	0.519472	0.99975	brown	grey
NACAD	0.047887	-0.531905	0.596454	0.866117	0.759889	-8.16665	8.28588e-12	6.10021e-09	0.597283	-6.63448	5.48606e-09	5.16086e-06	-0.0318112	0.353214	0.724976	0.999975	-0.00697311	0.0770344	0.938813	0.999994	0.067577	-0.741134	0.46106	0.99975	brown	blue
PLXNA4	0.162008	-0.847657	0.399482	0.755418	0.745193	-3.77251	0.00033211	0.00578562	0.597414	-3.12586	0.00256985	0.0264049	-0.108226	0.566051	0.573147	0.999975	-0.0404679	0.210589	0.833812	0.999994	0.126632	-0.654196	0.515102	0.99975	brown	turquoise
MEF2D	0.204012	-1.87097	0.0654763	0.373364	0.694868	-6.16582	3.83283e-08	5.1921e-06	0.600801	-5.51	5.44924e-07	0.000137719	0.151621	-1.38999	0.168881	0.999975	0.0260491	-0.237599	0.812877	0.999994	-0.109452	0.991099	0.325008	0.99975	brown	grey
BACE1-AS	0.271654	-1.60216	0.113566	0.464329	0.578344	-3.30031	0.00151365	0.0160091	0.610216	-3.59903	0.000587808	0.0106045	0.0119275	-0.0703207	0.944136	0.999975	0.105175	-0.616943	0.539249	0.999994	0.315445	-1.83694	0.0704097	0.99975	brown	grey
KDM6B	-0.228717	1.13426	0.260506	0.649079	0.814653	-3.909	0.000209723	0.00419769	0.611422	-3.03226	0.00338895	0.0312384	-0.122823	0.608886	0.544546	0.999975	-0.398272	1.96443	0.0534006	0.999994	-0.138981	0.680535	0.498382	0.99975	brown	magenta
EP300	0.15895	-1.82427	0.0723256	0.389777	0.728381	-8.08841	1.15707e-11	7.53567e-09	0.615643	-7.06588	8.9477e-10	1.68346e-06	-0.0471914	0.541415	0.589919	0.999975	-0.0617009	0.704303	0.483551	0.999994	0.0834254	-0.94538	0.347676	0.99975	brown	brown
TLN2	0.201114	-2.08457	0.0407118	0.308391	0.8745	-8.77021	6.31578e-13	9.72227e-10	0.61939	-6.42019	1.33972e-08	8.72521e-06	0.184821	-1.91498	0.0595292	0.999975	0.381839	-3.93637	0.000191049	0.647007	0.338573	-3.46502	0.000903892	0.99975	brown	grey
[truncated: 15,315 more rows]
