# Supplementary material for: Modeling gene x environment interactions in PTSD using glucocorticoid-induced transcriptomics in human neurons
Source: Research Square preprint supplement (doi:10.21203/rs.3.rs-267139/v1), 2021-02-25
Supplement: Supplementary file 5 [file afeb24d0e20240b0c09d1a5b.xlsx]

## Sheet: module_black
Category	ID	Name	p-value	q-value Bonferroni	q-value FDR B&H	q-value FDR B&Y	Hit Count in Query List	Hit Count in Genome	Hit in Query List
GO: Molecular Function	GO:0000981	DNA-binding transcription factor activity, RNA polymerase II-specific	5.379e-07	0.0003792	0.0003792	0.002706	52	1615	ZNF845,HIF1A,ZSCAN12,ZNF155,ZNF268,MIER3,BACH1,ZNF813,ZNF267,ZNF25,THAP2,ZNF547,ZSCAN30,NFYA,ZNF81,ZNF615,ZNF468,ZNF160,ZNF548,ZNF614,ZNF449,ZNF823,FOXN2,ZBTB33,ZNF484,ZNF569,ZNF254,E2F6,CGGBP1,FOXJ3,ATF2,ZBTB1,THAP9,CREBL2,ZNF529,IKZF5,ZNF260,ZNF10,TARDBP,ZNF17,ZNF20,ZNF28,GZF1,ZNF41,ZNF420,ZNF518B,ZNF84,ZNF83,ZNF512,ZBTB11,ZNF654,GABPA
GO: Molecular Function	GO:0140098	catalytic activity, acting on RNA	6.685e-06	0.004713	0.002356	0.01682	21	438	NCBP1,TSN,DDX1,DDX3X,DDX5,DHX15,POLR1B,TENT2,FDXACB1,NUDT21,CPSF6,DHX40,POLR2B,DCP2,YTHDC2,ERI1,TRNT1,PDE12,DDX3Y,MTREX,CMTR2
GO: Molecular Function	GO:0003724	RNA helicase activity	3.101e-05	0.02186	0.007287	0.052	8	78	DDX1,DDX3X,DDX5,DHX15,DHX40,YTHDC2,DDX3Y,MTREX
GO: Molecular Function	GO:0004386	helicase activity	0.0001183	0.08342	0.02086	0.1488	11	177	ERCC6,SMARCAD1,DDX1,DDX3X,DDX5,DHX15,DHX40,YTHDC2,MSH6,DDX3Y,MTREX
GO: Biological Process	GO:0098781	ncRNA transcription	9.868e-07	0.003751	0.002786	0.02457	11	111	NCBP1,GTF3C3,INTS2,SPIN1,POLR1B,ICE2,POLR2B,NOL11,GTF2E1,INTS6,RPRD1A
GO: Biological Process	GO:0048193	Golgi vesicle transport	2.088e-06	0.007935	0.002786	0.02457	30	766	MON2,CCP110,EPS15,SEC24A,COPB2,TTC26,TBC1D32,RAB10,RINT1,AP1G1,COG6,PITPNB,ATL2,SEC23A,ATG5,TRAPPC11,TBC1D15,COPB1,ACTR2,ARCN1,TRIM23,BBS10,SLC30A6,USO1,SAR1B,SEC23IP,RP2,ZW10,DOP1A,RAB33B
GO: Biological Process	GO:0032446	protein modification by small protein conjugation	2.199e-06	0.008358	0.002786	0.02457	34	935	KLHL24,HIF1A,PEX13,PSMD5,SOCS6,FEM1C,MDM2,FBXO38,SENP1,KLHL9,PLAA,KLHL7,HACE1,DCAF17,ARRDC3,KLHL8,MED23,WDR48,SEL1L,ATG5,CUL4B,CUL2,UBR2,RCHY1,NUP98,UBA2,UBR7,TRIM23,NDC1,RNF6,KLHL15,RLIM,HERC4,CDC23
GO: Biological Process	GO:0044265	cellular macromolecule catabolic process	5.764e-06	0.02191	0.004477	0.03949	39	1201	ZC3H14,NCBP1,PSMD5,SOCS6,MDM2,PTK2,DDX5,FBXO38,SENP1,PLAA,USP38,HACE1,CLTC,KLHL8,TENT2,KPNA1,ARMC8,SEL1L,CUL4B,CUL2,UBR2,RCHY1,VPS4B,DCP2,LAMP2,IDE,ERI1,ATE1,TARDBP,LRPPRC,PPP2R5C,PDE12,RNF6,KLHL15,MTM1,RLIM,MTREX,YTHDF3,CDC23
GO: Biological Process	GO:0006886	intracellular protein transport	6.613e-06	0.02514	0.004477	0.03949	46	1536	CCP110,SEC24A,COPB2,GDAP1,PEX13,FAM91A1,NCBP1,MDM2,TTC26,DDX5,SNX13,PIK3R4,TBC1D32,RAB10,AP1G1,CLTC,HSPA4,SEC23A,KPNA1,SEL1L,ATG5,TBC1D15,COPB1,NUP98,RANBP6,LAMP2,IDE,STAM,NCOA4,ECT2,AP3M1,ACTR2,ARCN1,TRIM23,BBS10,NMD3,TARDBP,NDC1,CSE1L,NAPB,USO1,SAR1B,SEC23IP,TTC30A,IPO11,RAB33B
GO: Biological Process	GO:0006888	endoplasmic reticulum to Golgi vesicle-mediated transport	7.067e-06	0.02686	0.004477	0.03949	14	220	SEC24A,COPB2,RINT1,COG6,ATL2,SEC23A,TRAPPC11,COPB1,ARCN1,USO1,SAR1B,SEC23IP,ZW10,RAB33B
GO: Biological Process	GO:0070647	protein modification by small protein conjugation or removal	9.956e-06	0.03784	0.005406	0.04768	37	1138	CCP110,KLHL24,HIF1A,PEX13,PSMD5,SOCS6,FEM1C,MDM2,FBXO38,SENP1,KLHL9,PLAA,USP38,KLHL7,HACE1,DCAF17,ARRDC3,KLHL8,MED23,WDR48,SEL1L,ATG5,CUL4B,CUL2,UBR2,RCHY1,NUP98,UBA2,STAM,UBR7,TRIM23,NDC1,RNF6,KLHL15,RLIM,HERC4,CDC23
GO: Biological Process	GO:0016567	protein ubiquitination	1.673e-05	0.06358	0.007769	0.06852	30	852	KLHL24,HIF1A,PEX13,PSMD5,SOCS6,FEM1C,MDM2,FBXO38,KLHL9,PLAA,KLHL7,HACE1,DCAF17,ARRDC3,KLHL8,MED23,WDR48,SEL1L,ATG5,CUL4B,CUL2,UBR2,RCHY1,UBR7,TRIM23,RNF6,KLHL15,RLIM,HERC4,CDC23
GO: Biological Process	GO:0051640	organelle localization	1.839e-05	0.06992	0.007769	0.06852	32	944	CCP110,HIF1A,SEC24A,PEX13,FAM91A1,CLASP2,PTK2,TTC26,TBC1D32,RAB10,SEC23A,ATG5,C12orf4,TBC1D15,MCPH1,VPS4B,NUP98,AP3M1,OPA1,ACTR2,ARCN1,BBS10,NMD3,TBCCD1,LRPPRC,USO1,MTM1,SAR1B,SEC23IP,TBC1D23,ZW10,CDC23
GO: Biological Process	GO:0034470	ncRNA processing	2.952e-05	0.1122	0.01122	0.09896	18	389	RIOK3,DDX1,WDR75,INTS2,UTP15,FDXACB1,PUS7,WDR36,C9orf64,ELP1,NOL11,ERI1,SHQ1,INTS6,THADA,TRNT1,ELP2,MTREX
GO: Biological Process	GO:0009057	macromolecule catabolic process	3.999e-05	0.152	0.01363	0.1202	42	1453	ZC3H14,NCBP1,PSMD5,SOCS6,MDM2,PTK2,DDX5,PIK3R4,FBXO38,PHKB,SENP1,PLAA,USP38,HACE1,CLTC,KLHL8,TENT2,KPNA1,ARMC8,SEL1L,CUL4B,CUL2,UBR2,NRDC,RCHY1,VPS4B,DCP2,LAMP2,IDE,ERI1,ATE1,TARDBP,LRPPRC,PPP2R5C,PDE12,RNF6,KLHL15,MTM1,RLIM,MTREX,YTHDF3,CDC23
GO: Biological Process	GO:0006397	mRNA processing	4.428e-05	0.1683	0.01363	0.1202	22	557	ZC3H14,RNGTT,NCBP1,DDX1,DDX5,DHX15,PRMT9,TENT2,PTBP3,NUDT21,CPSF6,DHX40,POLR2B,NUP98,PAPOLG,TARDBP,PDE12,SF3B1,RPRD1A,PTCD2,MTREX,CMTR2
GO: Biological Process	GO:0016071	mRNA metabolic process	4.726e-05	0.1796	0.01363	0.1202	30	901	ZC3H14,HIF1A,RNGTT,NCBP1,PSMD5,DDX1,DDX5,DHX15,PRMT9,TENT2,PUS7,PTBP3,NUDT21,CPSF6,DHX40,POLR2B,DCP2,NUP98,ERI1,ZBTB1,PAPOLG,HIPK3,TARDBP,PDE12,SF3B1,RPRD1A,PTCD2,MTREX,CMTR2,YTHDF3
GO: Biological Process	GO:0034660	ncRNA metabolic process	5.018e-05	0.1908	0.01363	0.1202	20	482	RIOK3,DDX1,WDR75,INTS2,UTP15,TENT2,FDXACB1,PUS7,WDR36,C9orf64,ELP1,NOL11,ERI1,SHQ1,INTS6,SEPSECS,THADA,TRNT1,ELP2,MTREX
GO: Biological Process	GO:0007030	Golgi organization	7.432e-05	0.2825	0.01803	0.159	10	145	CLASP2,HACE1,CLTC,ATL2,TRAPPC11,GORASP2,USO1,SEC23IP,ZW10,RAB33B
GO: Biological Process	GO:0044257	cellular protein catabolic process	7.588e-05	0.2884	0.01803	0.159	27	791	PSMD5,SOCS6,MDM2,PTK2,FBXO38,SENP1,PLAA,USP38,HACE1,CLTC,KLHL8,ARMC8,SEL1L,CUL4B,CUL2,UBR2,RCHY1,VPS4B,LAMP2,IDE,ATE1,PPP2R5C,RNF6,KLHL15,MTM1,RLIM,CDC23
GO: Biological Process	GO:0042795	snRNA transcription by RNA polymerase II	9.873e-05	0.3753	0.02207	0.1947	7	71	NCBP1,INTS2,ICE2,POLR2B,GTF2E1,INTS6,RPRD1A
GO: Biological Process	GO:0009301	snRNA transcription	0.000108	0.4104	0.02211	0.195	7	72	NCBP1,INTS2,ICE2,POLR2B,GTF2E1,INTS6,RPRD1A
GO: Biological Process	GO:0006511	ubiquitin-dependent protein catabolic process	0.0001153	0.4383	0.02211	0.195	23	637	PSMD5,MDM2,PTK2,FBXO38,SENP1,PLAA,USP38,HACE1,KLHL8,ARMC8,SEL1L,CUL4B,CUL2,UBR2,RCHY1,VPS4B,ATE1,PPP2R5C,RNF6,KLHL15,MTM1,RLIM,CDC23
GO: Biological Process	GO:0031123	RNA 3'-end processing	0.0001163	0.4422	0.02211	0.195	10	153	ZC3H14,NCBP1,INTS2,NUDT21,CPSF6,ERI1,PAPOLG,INTS6,TRNT1,RPRD1A
GO: Biological Process	GO:0019941	modification-dependent protein catabolic process	0.0001323	0.503	0.02302	0.2031	23	643	PSMD5,MDM2,PTK2,FBXO38,SENP1,PLAA,USP38,HACE1,KLHL8,ARMC8,SEL1L,CUL4B,CUL2,UBR2,RCHY1,VPS4B,ATE1,PPP2R5C,RNF6,KLHL15,MTM1,RLIM,CDC23
GO: Biological Process	GO:0006895	Golgi to endosome transport	0.0001332	0.5065	0.02302	0.2031	4	18	MON2,EPS15,SLC30A6,DOP1A
GO: Biological Process	GO:0051603	proteolysis involved in cellular protein catabolic process	0.0001485	0.5644	0.02454	0.2164	25	735	PSMD5,SOCS6,MDM2,PTK2,FBXO38,SENP1,PLAA,USP38,HACE1,KLHL8,ARMC8,SEL1L,CUL4B,CUL2,UBR2,RCHY1,VPS4B,IDE,ATE1,PPP2R5C,RNF6,KLHL15,MTM1,RLIM,CDC23
GO: Biological Process	GO:0043632	modification-dependent macromolecule catabolic process	0.0001732	0.6584	0.02743	0.242	23	655	PSMD5,MDM2,PTK2,FBXO38,SENP1,PLAA,USP38,HACE1,KLHL8,ARMC8,SEL1L,CUL4B,CUL2,UBR2,RCHY1,VPS4B,ATE1,PPP2R5C,RNF6,KLHL15,MTM1,RLIM,CDC23
GO: Biological Process	GO:1900363	regulation of mRNA polyadenylation	0.000206	0.783	0.03132	0.2762	4	20	ZC3H14,NCBP1,NUDT21,CPSF6
GO: Biological Process	GO:0016482	cytosolic transport	0.0002268	0.8619	0.03265	0.288	10	166	MON2,EPS15,AP1G1,CLTC,HEATR5B,ACTR2,SLC30A6,AKTIP,TBC1D23,DOP1A
GO: Biological Process	GO:1905458	positive regulation of lymphoid progenitor cell differentiation	0.000232	0.8817	0.03265	0.288	2	2	NUDT21,ZBTB1
GO: Biological Process	GO:0051656	establishment of organelle localization	0.0002421	0.9202	0.03286	0.2899	26	804	CCP110,HIF1A,SEC24A,FAM91A1,CLASP2,PTK2,TTC26,TBC1D32,SEC23A,ATG5,C12orf4,TBC1D15,MCPH1,VPS4B,AP3M1,OPA1,ACTR2,BBS10,NMD3,LRPPRC,USO1,SAR1B,SEC23IP,TBC1D23,ZW10,CDC23
GO: Biological Process	GO:0016236	macroautophagy	0.0003191	1	0.04033	0.3557	14	313	ATP6V1C1,HIF1A,TP53INP1,PIK3R4,PLAA,TMEM41B,ATG5,VPS4B,LAMP2,STAM,MTM1,TBK1,NBR1,RAB33B
GO: Biological Process	GO:0006892	post-Golgi vesicle-mediated transport	0.0003255	1	0.04033	0.3557	8	113	MON2,EPS15,RAB10,AP1G1,TRIM23,SLC30A6,RP2,DOP1A
GO: Biological Process	GO:0006890	retrograde vesicle-mediated transport, Golgi to endoplasmic reticulum	0.0003289	1	0.04033	0.3557	7	86	COPB2,RINT1,PITPNB,COPB1,ARCN1,ZW10,RAB33B
GO: Biological Process	GO:0043631	RNA polyadenylation	0.0003456	1	0.04105	0.3621	6	62	ZC3H14,NCBP1,TENT2,NUDT21,CPSF6,PAPOLG
GO: Biological Process	GO:0007034	vacuolar transport	0.0004121	1	0.04746	0.4186	9	147	PIK3R4,AP1G1,VPS4B,LAMP2,NCOA4,AP3M1,AKTIP,MTM1,LEPROTL1
GO: Cellular Component	GO:0030120	vesicle coat	1.368e-08	7.827e-06	7.827e-06	5.422e-05	10	59	EPS15,SEC24A,COPB2,AP1G1,CLTC,SEC23A,COPB1,FCHO2,ARCN1,SAR1B
GO: Cellular Component	GO:0000790	nuclear chromatin	5.484e-07	0.0003137	8.951e-05	0.00062	56	1924	ZNF845,HIF1A,ZSCAN12,ZNF155,ZNF268,MIER3,BACH1,ZNF813,ZNF267,ZNF25,THAP2,ZNF547,ZSCAN30,NFYA,POLR1B,ZNF81,ZNF615,ZNF468,ZNF160,ZNF548,ZNF614,ZNF449,ZNF823,FOXN2,ZBTB33,ZNF484,ZNF569,CPSF6,POLR2B,ZNF254,E2F6,CGGBP1,FOXJ3,ATF2,ZBTB1,THAP9,CREBL2,ZNF529,IKZF5,ZNF260,ZNF10,TARDBP,MSH6,ZNF17,ZNF20,ZNF28,GZF1,ZNF41,ZNF420,ZNF518B,ZNF84,ZNF83,ZNF512,ZBTB11,ZNF654,GABPA
GO: Cellular Component	GO:0048475	coated membrane	6.259e-07	0.000358	8.951e-05	0.00062	11	109	EPS15,SEC24A,COPB2,AP1G1,CLTC,SEC23A,COPB1,FCHO2,AP3M1,ARCN1,SAR1B
GO: Cellular Component	GO:0030117	membrane coat	6.259e-07	0.000358	8.951e-05	0.00062	11	109	EPS15,SEC24A,COPB2,AP1G1,CLTC,SEC23A,COPB1,FCHO2,AP3M1,ARCN1,SAR1B
GO: Cellular Component	GO:0030660	Golgi-associated vesicle membrane	1.171e-06	0.0006696	0.0001339	0.0009276	11	116	SEC24A,COPB2,AP1G1,CLTC,SEC23A,COPB1,ZDHHC17,ARCN1,USO1,SAR1B,SEC23IP
GO: Cellular Component	GO:0000151	ubiquitin ligase complex	8.894e-06	0.005088	0.0008479	0.005874	16	296	KLHL24,FBXO38,KLHL9,KLHL7,MKLN1,DCAF17,KLHL8,MED23,ARMC8,SEL1L,CUL4B,CUL2,UBR2,RCHY1,KLHL15,CDC23
GO: Cellular Component	GO:0000139	Golgi membrane	1.098e-05	0.006281	0.0008973	0.006216	28	770	SAMD8,SEC24A,COPB2,RXYLT1,ADAM10,RAB10,MBTPS2,AP1G1,COG6,HACE1,CLTC,PITPNB,SEC23A,COPB1,SLC35B3,TVP23B,ZDHHC17,ARCN1,TRIM23,SLC30A6,GORASP2,ATP2C1,USO1,HS2ST1,SAR1B,SEC23IP,DOP1A,RAB33B
GO: Cellular Component	GO:0030662	coated vesicle membrane	2.014e-05	0.01152	0.001351	0.009358	12	185	EPS15,SEC24A,COPB2,AP1G1,CLTC,SEC23A,COPB1,FCHO2,ARCN1,USO1,SAR1B,SEC23IP
GO: Cellular Component	GO:0005798	Golgi-associated vesicle	2.125e-05	0.01216	0.001351	0.009358	12	186	SEC24A,COPB2,ADAM10,AP1G1,CLTC,SEC23A,COPB1,ZDHHC17,ARCN1,USO1,SAR1B,SEC23IP
GO: Cellular Component	GO:1990234	transferase complex	3.474e-05	0.01987	0.001987	0.01377	28	821	KLHL24,SOCS6,PIK3R4,FBXO38,PHKB,KLHL9,PIGA,KLHL7,MKLN1,DCAF17,DLD,POLR1B,KLHL8,MED23,TENT2,ARMC8,SEL1L,ATG5,CUL4B,CUL2,UBR2,RCHY1,POLR2B,E2F6,GTF2E1,RPRD1A,KLHL15,CDC23
GO: Cellular Component	GO:0099023	vesicle tethering complex	5.708e-05	0.03265	0.002968	0.02056	7	67	RAB10,RINT1,COG6,TRAPPC11,VPS8,AKTIP,ZW10
GO: Cellular Component	GO:0016604	nuclear body	0.0001419	0.08117	0.006764	0.04686	26	799	ZC3H14,HIF1A,TP53INP1,ORC3,MDM2,PTK2,DDX1,DDX3X,DHX15,ABITRAM,HACE1,S100PBP,RCHY1,NUDT21,CPSF6,ICE2,NUP98,ZBTB1,SHQ1,PAPOLG,HIPK3,TARDBP,SF3B1,RNF6,RP2,NBR1
GO: Cellular Component	GO:0031461	cullin-RING ubiquitin ligase complex	0.0001643	0.09399	0.00723	0.05008	10	164	KLHL24,FBXO38,KLHL9,KLHL7,DCAF17,KLHL8,CUL4B,CUL2,KLHL15,CDC23
GO: Cellular Component	GO:0031463	Cul3-RING ubiquitin ligase complex	0.0001981	0.1133	0.008093	0.05606	5	37	KLHL24,KLHL9,KLHL7,KLHL8,KLHL15
GO: Cellular Component	GO:0098791	Golgi apparatus subcompartment	0.0002424	0.1387	0.009245	0.06404	16	391	FAM91A1,CLASP2,ADAM10,RAB10,AP1G1,COG6,HACE1,CLTC,RELCH,LAMP2,GORASP2,ATP2C1,USO1,SAR1B,TBC1D23,DOP1A
GO: Cellular Component	GO:0031984	organelle subcompartment	0.0004673	0.2673	0.01671	0.1157	16	415	FAM91A1,CLASP2,ADAM10,RAB10,AP1G1,COG6,HACE1,CLTC,RELCH,LAMP2,GORASP2,ATP2C1,USO1,SAR1B,TBC1D23,DOP1A
GO: Cellular Component	GO:0005802	trans-Golgi network	0.0005557	0.3179	0.0187	0.1295	12	263	FAM91A1,CLASP2,ADAM10,RAB10,AP1G1,COG6,CLTC,RELCH,LAMP2,ATP2C1,TBC1D23,DOP1A
GO: Cellular Component	GO:0070939	Dsl1/NZR complex	0.0006417	0.367	0.02039	0.1413	2	3	RINT1,ZW10
GO: Cellular Component	GO:0031965	nuclear membrane	0.0007746	0.4431	0.02332	0.1615	13	312	MATR3,GTF3C3,SENP1,INTS2,SPIN1,NEMP1,NUP98,ZBTB1,LRPPRC,NDC1,RNF6,DPY19L4,DPY19L2P2
GO: Cellular Component	GO:0030125	clathrin vesicle coat	0.0009327	0.5335	0.02667	0.1848	4	30	EPS15,AP1G1,CLTC,FCHO2
GO: Cellular Component	GO:0030131	clathrin adaptor complex	0.001059	0.6055	0.02883	0.1997	4	31	EPS15,AP1G1,FCHO2,AP3M1
GO: Cellular Component	GO:0005794	Golgi apparatus	0.001147	0.6561	0.02982	0.2066	40	1643	SAMD8,SEC24A,COPB2,FAM91A1,CLASP2,RXYLT1,ADAM10,SLC35D1,RAB10,MBTPS2,AP1G1,COG6,HACE1,CLTC,PITPNB,SEC23A,TRAPPC11,RELCH,COPB1,SLC35B3,LAMP2,TVP23B,ZDHHC17,AP3M1,ARCN1,TRIM23,SLC30A6,MSH6,GORASP2,PPP2R5C,ATP2C1,USO1,HS2ST1,SAR1B,SEC23IP,RP2,TBC1D23,PRRC1,DOP1A,RAB33B
GO: Cellular Component	GO:0030127	COPII vesicle coat	0.00126	0.7208	0.03003	0.2081	3	15	SEC24A,SEC23A,SAR1B
GO: Cellular Component	GO:0030126	COPI vesicle coat	0.00126	0.7208	0.03003	0.2081	3	15	COPB2,COPB1,ARCN1
GO: Cellular Component	GO:0030118	clathrin coat	0.001619	0.9263	0.03705	0.2567	5	58	EPS15,AP1G1,CLTC,FCHO2,AP3M1
GO: Cellular Component	GO:0030135	coated vesicle	0.001725	0.9866	0.03795	0.2629	12	300	EPS15,SEC24A,COPB2,AP1G1,CLTC,SEC23A,COPB1,FCHO2,ARCN1,USO1,SAR1B,SEC23IP
GO: Cellular Component	GO:0005637	nuclear inner membrane	0.001885	1	0.03993	0.2766	5	60	MATR3,NEMP1,LRPPRC,DPY19L4,DPY19L2P2
GO: Cellular Component	GO:0035061	interchromatin granule	0.002097	1	0.04157	0.288	2	5	CPSF6,TARDBP
GO: Cellular Component	GO:1902494	catalytic complex	0.002124	1	0.04157	0.288	37	1536	KLHL24,PSMD5,SOCS6,DDX5,PIK3R4,FBXO38,PHKB,KLHL9,PIGA,KLHL7,MKLN1,DCAF17,DLD,POLR1B,KLHL8,MED23,TENT2,ARMC8,SEL1L,ATG5,CUL4B,CUL2,UBR2,RCHY1,POLR2B,UBA2,E2F6,IDE,SHOC2,PPP2R1B,GTF2E1,PPP2R5C,SF3B1,RPRD1A,KLHL15,MTREX,CDC23
GO: Cellular Component	GO:0012507	ER to Golgi transport vesicle membrane	0.00218	1	0.04157	0.288	5	62	SEC24A,SEC23A,USO1,SAR1B,SEC23IP
GO: Cellular Component	GO:0030133	transport vesicle	0.002612	1	0.04768	0.3303	15	445	APH1B,SEC24A,COPB2,ADAM10,RAB10,AP1G1,CLTC,SEC23A,COPB1,ARCN1,ATP2C1,TMEM168,USO1,SAR1B,SEC23IP
GO: Cellular Component	GO:0005776	autophagosome	0.002668	1	0.04768	0.3303	6	94	TP53INP1,PIK3R4,ATG5,LAMP2,NCOA4,NBR1
Pathway	1269649	Gene Expression	1.03e-09	1.269e-06	1.269e-06	9.763e-06	60	1844	ERCC6,RNGTT,ZNF155,TP53INP1,ZNF268,ZNF267,RIOK3,NCBP1,TSN,PSMD5,MDM2,ZNF25,GTF3C3,DDX1,DDX5,ZNF585B,DHX15,ZNF547,WDR75,INTS2,UTP15,POLR1B,ZNF615,ZNF468,MED23,ZNF160,ZNF548,ZNF614,PUS7,WDR36,ZNF484,ZNF569,NUDT21,RBL2,ICE2,POLR2B,DCP2,ZNF254,NUP98,NOL11,ERI1,ATF2,ZNF529,ZNF10,ZNF17,PPP2R1B,LRPPRC,GTF2E1,INTS6,ZNF20,TRNT1,PPP2R5C,ZNF28,NDC1,SF3B1,RPRD1A,ZNF41,ZNF420,ZNF761,MTREX
Pathway	1269650	Generic Transcription Pathway	5.509e-06	0.006787	0.003393	0.02611	31	879	ZNF155,TP53INP1,ZNF268,ZNF267,MDM2,ZNF25,ZNF585B,ZNF547,ZNF615,ZNF468,MED23,ZNF160,ZNF548,ZNF614,ZNF484,ZNF569,RBL2,POLR2B,ZNF254,ATF2,ZNF529,ZNF10,ZNF17,PPP2R1B,LRPPRC,ZNF20,PPP2R5C,ZNF28,ZNF41,ZNF420,ZNF761
Pathway	1268726	ER to Golgi Anterograde Transport	3.069e-05	0.03781	0.01254	0.09647	10	134	SEC24A,COPB2,COG6,SEC23A,COPB1,ARCN1,NAPB,USO1,SAR1B,SEC23IP
Pathway	1269877	Membrane Trafficking	4.071e-05	0.05015	0.01254	0.09647	23	614	EPS15,SEC24A,COPB2,RAB10,RINT1,AP1G1,COG6,CLTC,SEC23A,TRAPPC11,TBC1D15,COPB1,VPS4B,STAM,FCHO2,ACTR2,ARCN1,NAPB,USO1,SAR1B,SEC23IP,ZW10,RAB33B
Pathway	1268714	Asparagine N-linked glycosylation	9.118e-05	0.1123	0.02097	0.1613	14	285	NANP,SEC24A,COPB2,GFPT1,COG6,SEC23A,SEL1L,COPB1,CANX,ARCN1,NAPB,USO1,SAR1B,SEC23IP
Pathway	1383088	RNA polymerase II transcribes snRNA genes	0.0001021	0.1258	0.02097	0.1613	7	73	NCBP1,INTS2,ICE2,POLR2B,GTF2E1,INTS6,RPRD1A
Pathway	1269876	Vesicle-mediated transport	0.0001218	0.15	0.02144	0.1649	23	660	EPS15,SEC24A,COPB2,RAB10,RINT1,AP1G1,COG6,CLTC,SEC23A,TRAPPC11,TBC1D15,COPB1,VPS4B,STAM,FCHO2,ACTR2,ARCN1,NAPB,USO1,SAR1B,SEC23IP,ZW10,RAB33B
Pathway	1268725	Transport to the Golgi and subsequent modification	0.0001767	0.2177	0.02721	0.2094	10	165	SEC24A,COPB2,COG6,SEC23A,COPB1,ARCN1,NAPB,USO1,SAR1B,SEC23IP
Pathway	1270082	Synthesis of PIPs at the late endosome membrane	0.0003593	0.4426	0.04918	0.3784	3	10	PIK3R4,MTMR7,MTM1
Pathway	193328	mRNA surveillance pathway	0.0004053	0.4993	0.04993	0.3842	7	91	RNGTT,NCBP1,NUDT21,CPSF6,PAPOLG,PPP2R1B,PPP2R5C
Drug	1291_UP	Benzbromarone [3562-84-3]; Up 200; 9.4uM; HL60; HT_HG-U133A	1.396e-13	2.504e-09	2.504e-09	2.597e-08	21	189	BACH1,TSN,MDM2,ADAM10,PTK2,DDX3X,MFAP3,MBTPS2,NFYA,HSPA4,SEC23A,CUL4B,PTBP3,NEMP1,NUDT21,CLIC4,ZDHHC17,FOXJ3,HIPK3,RNF6,HERC4
Drug	1762_DN	Dacarbazine [4342-03-4]; Down 200; 22uM; HL60; HG-U133A	2.433e-12	4.364e-08	2.182e-08	2.263e-07	20	195	EPS15,KLHL24,BACH1,RIOK3,ADAM10,GFPT1,DDX3X,PLAA,SPIN1,SEC23A,WDR48,NEMP1,NUDT21,CANX,SHOC2,ECT2,IKZF5,NMD3,PPP2R1B,ATP2C1
Drug	5101_DN	Prednisolone [50-24-8]; Down 200; 11uM; PC3; HT_HG-U133A	1.796e-11	3.222e-07	9.656e-08	1.002e-06	19	193	RNGTT,FRS2,RXYLT1,DDX3X,SNX13,MBTPS2,SPIN1,ARMC8,PTBP3,CANX,ZNF254,PHTF2,CREBL2,TRIM23,IKZF5,HIPK3,PPP2R5C,RNF6,MTM1
Drug	1318_UP	Metrizamide [31112-62-6]; Up 200; 5uM; HL60; HT_HG-U133A	2.154e-11	3.862e-07	9.656e-08	1.002e-06	19	195	KLHL24,ATP6V1C1,RNGTT,TSN,MDM2,ADAM10,DDX3X,MFAP3,MBTPS2,NFYA,ZNF468,HSPA4,WDR48,PTBP3,CLIC4,ZDHHC17,IKZF5,NMD3,HIPK3
Drug	3144_DN	Deptropine citrate [2169-75-7]; Down 200; 7.6uM; HL60; HT_HG-U133A	1.169e-10	2.097e-06	4.194e-07	4.35e-06	18	190	ATP6V1C1,RNGTT,RIOK3,TSN,ADAM10,DDX3X,FBXO38,MFAP3,NFYA,HSPA4,SEC23A,PTBP3,NEMP1,CLIC4,HIPK3,MSH6,PPP2R1B,RNF6
Drug	ctd:D004791	Enzyme Inhibitors	1.858e-10	3.332e-06	5.441e-07	5.644e-06	56	1667	ZC3H14,EPS15,ORC3,SEC24A,MATR3,NCBP1,TSN,CLASP2,GFPT1,DDX1,DDX3X,DDX5,DHX15,CLTC,NFYA,SLC39A6,DLD,PITPNB,HSPA4,SEC23A,PUS7,KPNA1,TBC1D15,NRDC,COPB1,CANX,NUP98,ELP1,NOL11,CLIC4,YTHDC2,LAMP2,SLC39A10,PPAT,CGGBP1,THAP9,UBR7,C18orf25,TARDBP,MSH6,LRPPRC,INTS6,GORASP2,TRNT1,PPP2R5C,PDE12,RBM12,CSE1L,RPRD1A,CEP44,SEC23IP,ELP2,ZW10,ZNF512,HCCS,PRRC1
Drug	2481_DN	Tobramycin [32986-56-4]; Down 200; 8.6uM; HL60; HT_HG-U133A	2.124e-10	3.809e-06	5.441e-07	5.644e-06	18	197	ATP6V1C1,RNGTT,ZNF155,BACH1,FEM1C,MDM2,ADAM10,PTK2,DDX3X,FBXO38,NFYA,SEL1L,PTBP3,RCHY1,SGCB,CANX,IKZF5,RNF6
Drug	5252_DN	Dipyridamole [58-32-2]; Down 200; 8uM; MCF7; HT_HG-U133A	1.407e-09	2.523e-05	2.803e-06	2.907e-05	17	195	ERCC6,FRS2,SOCS6,MDM2,DDX3X,SLC35D1,FBXO38,MFAP3,NFYA,ATL2,CUL4B,FOXN2,NUDT21,PHTF2,HIPK3,RNF6,HERC4
Drug	4799_UP	Zalcitabine [7481-89-2]; Up 200; 19uM; MCF7; HT_HG-U133A	1.407e-09	2.523e-05	2.803e-06	2.907e-05	17	195	ATP6V1C1,RNGTT,FRS2,ADAM10,DDX3X,MBTPS2,HSPA4,SEC23A,PTBP3,CLIC4,TRIM23,IKZF5,WDR47,RNF6,IRAK4,AKAP10,NNT
Drug	5350_DN	Hesperetin [520-33-2]; Down 200; 13.2uM; MCF7; HT_HG-U133A	1.645e-09	2.951e-05	2.951e-06	3.061e-05	17	197	ADAM10,LDAH,PTK2,DDX3X,KLHL9,MBTPS2,WDR48,CUL2,NUDT21,PHTF2,OPA1,TRIM23,C21orf91,PPP2R1B,PPP2R5C,USO1,RP2
Drug	6750_DN	Hesperetin [520-33-2]; Down 200; 13.2uM; PC3; HT_HG-U133A	6.596e-09	0.0001183	1.064e-05	0.0001103	16	189	RNGTT,GDAP1,DDX3X,SNX13,MBTPS2,SEC23A,CUL4B,PTBP3,NUDT21,CANX,PHTF2,CLIC4,PDE12,RNF6,SEC23IP,AKAP10
Drug	7439_DN	Disopyramide [3737-09-5]; Down 200; 11.8uM; MCF7; HT_HG-U133A	7.116e-09	0.0001276	1.064e-05	0.0001103	16	190	GDAP1,SOCS6,ADAM10,DDX3X,MBTPS2,NFYA,HSPA4,SEC23A,WDR48,PTBP3,CANX,CLIC4,TRIM23,RNF6,NNT,HERC4
Drug	1273_DN	Cephalexin monohydrate [23325-78-2]; Down 200; 11uM; HL60; HT_HG-U133A	8.27e-09	0.0001483	1.075e-05	0.0001115	16	192	MATR3,RIOK3,TSN,CLASP2,ADAM10,DDX3X,SLC39A6,SEC23A,KPNA1,CANX,CLIC4,ATF2,NMD3,MSH6,PPP2R1B,HERC4
Drug	6223_DN	Dizocilpine maleate [77086-22-7]; Down 200; 11.8uM; MCF7; HT_HG-U133A	8.909e-09	0.0001598	1.075e-05	0.0001115	16	193	BACH1,RIOK3,TSN,MDM2,DDX3X,MBTPS2,HSPA4,SEC23A,SEL1L,PTBP3,NEMP1,NUDT21,ZNF254,YTHDC2,PPP2R1B,NNT
Drug	4822_DN	Seneciphylline [480-81-9]; Down 200; 12uM; MCF7; HT_HG-U133A	9.593e-09	0.0001721	1.075e-05	0.0001115	16	194	DDX3X,EFEMP1,DCAF17,SEC23A,ARMC8,SEL1L,CUL2,UBR2,CLIC4,ATF2,RBM12,PCNX4,SEC23IP,PCMTD2,NNT,HERC4
Drug	2779_DN	Chelidonine monohydrate (+) [476-32-4]; Down 200; 10.8uM; MCF7; HT_HG-U133A	9.593e-09	0.0001721	1.075e-05	0.0001115	16	194	ATP6V1C1,RNGTT,CLASP2,ADAM10,PTK2,NFYA,SEC23A,WDR48,CUL4B,WDR47,MSH6,MTM1,TMEM184C,ZW10,HCCS,RAB33B
Drug	4805_UP	Tolnaftate [2398-96-1]; Up 200; 13uM; MCF7; HT_HG-U133A	1.111e-08	0.0001992	1.172e-05	0.0001215	16	196	ATP6V1C1,MDM2,ADAM10,DDX3X,SNX13,TMEM41B,HSPA4,ATG5,PTBP3,CLIC4,TRIM23,MSH6,TMEM267,MTM1,AKAP10,HERC4
Drug	ctd:C089032	rimonabant	2.533e-08	0.0004543	2.524e-05	0.0002618	18	266	EPS15,HIF1A,DDX3X,KLHL9,CLTC,PTBP3,CANX,CLIC4,LAMP2,SLC39A10,OPA1,ACTR2,HIPK3,SEPSECS,NDC1,RNF6,FAM126B,IPO11
Drug	5362_DN	Nilutamide [63612-50-0]; Down 200; 12.6uM; MCF7; HT_HG-U133A	5.017e-08	0.0008999	4.499e-05	0.0004667	15	190	KLHL24,RNGTT,RIOK3,DDX3X,MBTPS2,HSPA4,SEC23A,KPNA1,ATG5,CUL4B,NMD3,ZNF83,ZW10,NNT,HERC4
Drug	1286_UP	Prochlorperazine dimaleate [84-02-6]; Up 200; 6.6uM; HL60; HT_HG-U133A	5.017e-08	0.0008999	4.499e-05	0.0004667	15	190	ZSCAN12,RNGTT,TSN,SOCS6,GFPT1,DDX3X,MBTPS2,NFYA,HSPA4,CUL4B,PTBP3,CLIC4,TRIM23,HIPK3,RNF6
Drug	7189_UP	Iopamidol [60166-93-0]; Up 200; 5.2uM; MCF7; HT_HG-U133A	6.613e-08	0.001186	5.586e-05	0.0005794	15	194	RNGTT,SOCS6,MDM2,ADAM10,RINT1,MBTPS2,NFYA,HSPA4,PTBP3,NEMP1,PHTF2,ZDHHC17,ZNF10,RNF6,HERC4
Drug	2552_DN	Flunixin meglumine [42461-84-7]; Down 200; 8.2uM; HL60; HT_HG-U133A	7.078e-08	0.00127	5.586e-05	0.0005794	15	195	TSN,LDAH,DDX3X,KLHL9,NFYA,HSPA4,WDR48,NUDT21,RBL2,VPS8,YTHDC2,IKZF5,PPP2R1B,NDC1,SEC23IP
Drug	5333_DN	Zidovudine, AZT [30516-87-1]; Down 200; 15uM; MCF7; HT_HG-U133A	7.573e-08	0.001358	5.586e-05	0.0005794	15	196	RIOK3,MDM2,PIK3R4,EFEMP1,MBTPS2,HSPA4,ARMC8,METTL4,TRIM23,C21orf91,C1orf115,ATP2C1,RNF6,SEC23IP,HERC4
Drug	2915_DN	Ethamsylate [2624-44-4]; Down 200; 15.2uM; HL60; HT_HG-U133A	8.099e-08	0.001452	5.586e-05	0.0005794	15	197	KLHL24,ADAM10,PIGA,PTBP3,TRAPPC11,PHTF2,YTHDC2,STAM,ZDHHC17,ATF2,CREBL2,OPA1,PAPOLG,HS2ST1,HCCS
Drug	1597_UP	Enoxacin [74011-58-8]; Up 200; 12.4uM; HL60; HG-U133A	8.099e-08	0.001452	5.586e-05	0.0005794	15	197	BACH1,RIOK3,FBXO38,KLHL7,HSPBAP1,RBL2,LAMP2,BBS10,PAPOLG,PPP2R5C,MTM1,RP2,ZNF83,STK38L,PRRC1
Drug	1777_DN	Acetopromazine maleate salt [3598-37-6]; Down 200; 9uM; HL60; HG-U133A	8.099e-08	0.001452	5.586e-05	0.0005794	15	197	RNGTT,LDAH,DDX3X,SPIN1,HSPA4,KPNA1,WDR48,LAMP2,IDE,NMD3,PPP2R1B,ATP2C1,RPRD1A,HS2ST1,PCMTD2
Drug	2425_DN	Naringin hydrate [11032-30-7]; Down 200; 6.6uM; HL60; HT_HG-U133A	8.657e-08	0.001553	5.751e-05	0.0005964	15	198	RIOK3,FEM1C,ADAM10,DDX3X,RINT1,SEL1L,CUL2,PTBP3,NEMP1,PHTF2,ZDHHC17,IKZF5,NMD3,ZW10,NNT
Drug	1323_DN	Cefadroxil [50370-12-2]; Down 200; 11uM; HL60; HT_HG-U133A	2.537e-07	0.004549	0.0001625	0.001685	14	186	ATP6V1C1,RIOK3,TSN,ADAM10,DDX3X,SLC39A6,SEC23A,NEMP1,CANX,CLIC4,NMD3,MSH6,PPP2R1B,HERC4
Drug	2465_DN	Selegiline hydrochloride [14611-52-0]; Down 200; 17.8uM; HL60; HT_HG-U133A	3.291e-07	0.005903	0.0002035	0.002111	14	190	RNGTT,ZNF155,BACH1,MDM2,ADAM10,DDX3X,NXPE3,MFAP3,PLAA,PTBP3,SGCB,CANX,HIPK3,ZNF10
Drug	6914_UP	carmustine; Up 200; 100uM; MCF7; HT_HG-U133A	3.74e-07	0.006707	0.0002083	0.002161	14	192	ATP6V1C1,RNGTT,SEC24A,BACH1,RXYLT1,MDM2,WASHC5,PTBP3,STAM,BBS10,WDR47,PCNX4,MTM1,RP2
Drug	4816_DN	Salsolinol hydrobromide [38221-21-5]; Down 200; 15.4uM; MCF7; HT_HG-U133A	3.74e-07	0.006707	0.0002083	0.002161	14	192	ATP6V1C1,ZSCAN12,LDAH,DDX3X,DHX15,DCAF17,HSPA4,ARMC8,SEL1L,PTBP3,MSH6,PTCD2,NNT,HERC4
Drug	4596_DN	Lidocaone hydrochloride [73-78-9]; Down 200; 14.8uM; PC3; HT_HG-U133A	3.984e-07	0.007145	0.0002083	0.002161	14	193	ATP6V1C1,GDAP1,DDX3X,PLAA,MBTPS2,NFYA,HSPA4,PHTF2,CLIC4,TRIM23,NMD3,MTM1,IRAK4,HERC4
Drug	5221_DN	trifluoperazine dihydrochloride; Down 200; 10uM; MCF7; HT_HG-U133A	4.242e-07	0.007609	0.0002083	0.002161	14	194	PIGN,DDX3X,MBTPS2,NFYA,ATL2,CUL2,PTBP3,CPSF6,PHTF2,YTHDC2,FASTKD2,CSE1L,RNF6,TMEM168
Drug	1581_DN	Chlorthalidone [77-36-1]; Down 200; 11.8uM; HL60; HG-U133A	4.242e-07	0.007609	0.0002083	0.002161	14	194	RNGTT,ZNF267,GFPT1,DDX3X,KLHL9,WASHC5,SPIN1,WDR48,NUDT21,RBL2,PHTF2,HS2ST1,MTM1,IRAK4
Drug	1783_DN	Epivincamine [6835-99-0]; Down 200; 11.2uM; HL60; HG-U133A	4.516e-07	0.008099	0.0002083	0.002161	14	195	MATR3,RIOK3,DHX15,ARMC8,TRAPPC11,CLIC4,NMD3,MSH6,RPRD1A,TMEM168,USO1,LEPROTL1,STK38L,NNT
Drug	3210_DN	Chlorpropamide [94-20-2]; Down 200; 14.4uM; MCF7; HT_HG-U133A	4.516e-07	0.008099	0.0002083	0.002161	14	195	GDAP1,FRS2,DDX3X,FBXO38,MBTPS2,NFYA,HSPA4,SEC23A,ELP1,CLIC4,TRIM23,NMD3,RNF6,NNT
Drug	2199_DN	Myosmine [532-12-7]; Down 200; 27.4uM; HL60; HT_HG-U133A	4.516e-07	0.008099	0.0002083	0.002161	14	195	ATP6V1C1,BACH1,ADAM10,SNX13,MFAP3,SEC23A,CUL4B,NEMP1,PHTF2,TRIM23,C18orf25,CSE1L,RNF6,ZW10
Drug	4786_DN	Atovaquone [95233-18-4]; Down 200; 11uM; MCF7; HT_HG-U133A	4.805e-07	0.008617	0.0002083	0.002161	14	196	RXYLT1,MDM2,DDX3X,NFYA,TMEM41B,UBR2,PHTF2,CLIC4,OPA1,MSH6,RNF6,TMEM184C,PCMTD2,ZNF654
Drug	6772_DN	Piperidolate hydrochloride [129-77-1]; Down 200; 11.2uM; MCF7; HT_HG-U133A	4.805e-07	0.008617	0.0002083	0.002161	14	196	FRS2,MDM2,FBXO38,PLAA,NFYA,TWSG1,CPSF6,PHTF2,C21orf91,C1orf115,RNF6,TTC30A,ZW10,RAB33B
Drug	1327_DN	Piperine [94-62-2]; Down 200; 14uM; HL60; HT_HG-U133A	4.805e-07	0.008617	0.0002083	0.002161	14	196	ZC3H14,ADAM10,DDX3X,SLC35D1,FBXO38,TWSG1,SEC23A,CUL4B,ATF2,TRIM23,C21orf91,PPP2R1B,AKAP10,RAB33B
Drug	1300_DN	Kynurenine, 3-hydroxy (R,S) [2147-61-7]; Down 200; 17.8uM; HL60; HT_HG-U133A	4.805e-07	0.008617	0.0002083	0.002161	14	196	RNGTT,FEM1C,ABITRAM,HSPA4,SEL1L,CUL4B,PTBP3,CANX,CLIC4,FASTKD2,C18orf25,PPP2R1B,THADA,ZW10
Drug	1311_DN	Pantothenic acid calcium salt monohydrate [63409-48-3]; Down 200; 8uM; HL60; HT_HG-U133A	5.11e-07	0.009166	0.0002083	0.002161	14	197	RNGTT,RIOK3,ADAM10,GFPT1,PTK2,DDX3X,SEC23A,ARMC8,WDR48,NEMP1,CANX,CLIC4,PPP2R1B,HERC4
Drug	7458_DN	Cortisone [53-06-5]; Down 200; 11uM; MCF7; HT_HG-U133A	5.11e-07	0.009166	0.0002083	0.002161	14	197	APH1B,MDM2,NFYA,ATL2,CUL4B,PTBP3,TRAPPC11,HSPBAP1,ZDHHC17,TRIM23,PPP2R5C,ATP2C1,SEC23IP,PTCD2
Drug	1923_DN	Apomorphine hydrochloride hemihydrate [41372-20-7]; Down 200; 6.4uM; PC3; HG-U133A	5.11e-07	0.009166	0.0002083	0.002161	14	197	EPS15,RNGTT,MATR3,TSN,CLASP2,DDX3X,MED23,WDR48,ATG5,CANX,ZBTB1,RBM12,PCNX4,DOP1A
Drug	2546_DN	Meclofenoxate hydrochloride [3685-84-5]; Down 200; 13.6uM; HL60; HT_HG-U133A	5.775e-07	0.01036	0.0002251	0.002335	14	199	RNGTT,SEC24A,RIOK3,DDX3X,RINT1,ZNF468,ARMC8,WDR48,SEL1L,METTL4,IKZF5,ATP2C1,PTCD2,NNT
Drug	5517_DN	Rimexolone [49697-38-3]; Down 200; 10.8uM; MCF7; HT_HG-U133A	5.775e-07	0.01036	0.0002251	0.002335	14	199	RNGTT,FEM1C,MDM2,DDX3X,WDR48,NEMP1,NUDT21,ZNF254,FOXJ3,TRIM23,ZNF20,RBM12,MTM1,ZNF83
Drug	ctd:C568608	PCI 5002	8.902e-07	0.01597	0.0003397	0.003523	28	735	KLHL24,ATP6V1C1,SAMD8,SEC24A,FRS2,RIOK3,FEM1C,GFPT1,SLC38A2,AP1G1,MKLN1,HSPA4,ATG5,LRRC8C,UBR2,FOXN2,DCP2,NUP98,E2F6,SLC39A10,ZBTB1,C21orf91,C18orf25,GZF1,RLIM,DDX3Y,HERC4,GABPA
Drug	973_DN	C768-0445; Down 200; 10uM; MCF7; HT_HG-U133A_EA	1.675e-06	0.03004	0.0006258	0.006491	13	187	RNGTT,GDAP1,ADAM10,GFPT1,DDX3X,KLHL9,HSPA4,PHTF2,RANBP6,CLIC4,PPP2R1B,HERC4,HCCS
Drug	6793_DN	Nocodazole [31430-18-9]; Down 200; 13.2uM; MCF7; HT_HG-U133A	1.886e-06	0.03383	0.0006766	0.007018	13	189	ATP6V1C1,RNGTT,MDM2,ADAM10,DDX3X,MBTPS2,HSPA4,PTBP3,PHTF2,MSH6,PPP2R1B,RNF6,HERC4
Drug	4121_DN	Ginkgolide A [15291-75-5]; Down 200; 9.8uM; MCF7; HT_HG-U133A	1.886e-06	0.03383	0.0006766	0.007018	13	189	GDAP1,MDM2,ADAM10,PTK2,DDX3X,NXPE3,HSPA4,SEC23A,PTBP3,NUDT21,CANX,TRIM23,RNF6
Drug	2137_DN	Trichostatin A, from Streptomyces sp.; Down 200; 0.1uM; HL60; HT_HG-U133A	2.001e-06	0.03588	0.0007036	0.007297	13	190	DDX3X,SNX13,SLC35D1,MBTPS2,NFYA,TWSG1,ARMC8,WDR48,CLIC4,TRIM23,RNF6,MTM1,SEC23IP
Drug	7549_DN	CP-944629 [668990-94-1]; Down 200; 10uM; PC3; HT_HG-U133A	2.121e-06	0.03804	0.0007148	0.007414	13	191	ATP6V1C1,ADAM10,DDX3X,FBXO38,MBTPS2,SEC23A,CANX,ZNF254,NMD3,PDE12,MTM1,NNT,HERC4
Drug	1563_UP	Quinacrine dihydrochloride dihydrate [6151-30-0]; Up 200; 7.8uM; HL60; HG-U133A	2.121e-06	0.03804	0.0007148	0.007414	13	191	CCP110,SEC24A,RIOK3,UBR2,NEMP1,DHX40,LAMP2,ECT2,C18orf25,PPP2R5C,ATP2C1,RP2,ZNF83
Drug	6714_DN	Hesperidin [520-26-3]; Down 200; 6.6uM; PC3; HT_HG-U133A	2.248e-06	0.04032	0.0007148	0.007414	13	192	ATP6V1C1,GDAP1,TSN,DDX3X,MBTPS2,SEC23A,PTBP3,CANX,TRIM23,MSH6,RNF6,AKAP10,NNT
Drug	942_DN	prazosin hydrochloride; Down 200; 10uM; MCF7; HT_HG-U133A_EA	2.248e-06	0.04032	0.0007148	0.007414	13	192	ADAM10,DDX3X,KLHL7,NFYA,PTBP3,ZNF254,PHTF2,ATF2,TRIM23,HIPK3,C1orf115,HERC4,ZNF654
Drug	5088_DN	Pyrantel tartrate [33401-94-4]; Down 200; 11.2uM; PC3; HT_HG-U133A	2.382e-06	0.04271	0.0007148	0.007414	13	193	GDAP1,DDX3X,SNX13,SPIN1,NFYA,SEL1L,NUDT21,CLIC4,YTHDC2,FOXJ3,MTM1,IRAK4,ZW10
Drug	6835_DN	Clobetasol propionate [25122-46-7]; Down 200; 8.6uM; MCF7; HT_HG-U133A	2.382e-06	0.04271	0.0007148	0.007414	13	193	ATP6V1C1,RNGTT,DDX3X,FBXO38,HSPA4,SEC23A,CUL4B,PTBP3,CLIC4,ZDHHC17,TRIM23,RNF6,HERC4
Drug	4566_DN	Sulpiride [15676-16-1]; Down 200; 11.8uM; PC3; HT_HG-U133A	2.382e-06	0.04271	0.0007148	0.007414	13	193	ATP6V1C1,RIOK3,DDX3X,NFYA,SLC39A6,HSPA4,SEC23A,ATG5,NUDT21,CLIC4,NMD3,MSH6,HERC4
Drug	3932_DN	Furaltadone hydrochloride [3759-92-0]; Down 200; 11uM; MCF7; HT_HG-U133A	2.522e-06	0.04524	0.0007148	0.007414	13	194	MDM2,ADAM10,NXPE3,SLC35D1,ARMC8,CUL2,PTBP3,RCHY1,PHTF2,ZDHHC17,HIPK3,PPP2R1B,PDE12
Drug	1278_UP	Tacrine hydrochloride hydrate [1684-40-8]; Up 200; 15.8uM; HL60; HT_HG-U133A	2.522e-06	0.04524	0.0007148	0.007414	13	194	ADAM10,DDX3X,MBTPS2,NFYA,HSPA4,NEMP1,CLIC4,IDE,ZDHHC17,HIPK3,MSH6,RNF6,HERC4
Drug	2965_DN	Iopanoic acid [96-83-3]; Down 200; 7uM; HL60; HT_HG-U133A	2.522e-06	0.04524	0.0007148	0.007414	13	194	TSN,SOCS6,DDX3X,MFAP3,MBTPS2,HSPA4,KPNA1,ARMC8,RCHY1,PHTF2,OPA1,RNF6,MTM1
Drug	3185_DN	Mifepristone [84371-65-3]; Down 200; 9.4uM; MCF7; HT_HG-U133A	2.67e-06	0.04789	0.0007148	0.007414	13	195	RNGTT,NCBP1,MDM2,ADAM10,MBTPS2,NFYA,FOXJ3,TRIM23,ATP2C1,MTM1,STK38L,NNT,HERC4
Drug	910_DN	trifluoperazine dihydrochloride; Down 200; 10uM; MCF7; HT_HG-U133A_EA	2.67e-06	0.04789	0.0007148	0.007414	13	195	CLASP2,SOCS6,MBTPS2,NFYA,CUL2,RBL2,ZNF254,PHTF2,ATP2C1,CSE1L,TMEM168,IRAK4,ZW10
Drug	2568_DN	Tinidazole [19387-91-8]; Down 200; 16.2uM; HL60; HT_HG-U133A	2.67e-06	0.04789	0.0007148	0.007414	13	195	ZNF813,NCBP1,TSN,DDX3X,FBXO38,RINT1,MBTPS2,NFYA,HSPA4,PTBP3,OPA1,IKZF5,NNT
Drug	2525_UP	Strophanthidin [66-28-4]; Up 200; 9.8uM; HL60; HT_HG-U133A	2.805e-06	0.05031	0.0007148	0.007414	12	166	KLHL24,SEC24A,ZNF267,DDX3X,AP1G1,NFYA,PHTF2,FASTKD2,HIPK3,C21orf91,C18orf25,ZBTB11
Drug	7425_UP	Diethylcarbamazine citrate [1642-54-2]; Up 200; 10.2uM; MCF7; HT_HG-U133A	2.826e-06	0.05068	0.0007148	0.007414	13	196	MDM2,DCAF17,CUL4B,CUL2,NEMP1,RBL2,PHTF2,ELP1,YTHDC2,IKZF5,BBS10,HIPK3,RNF6
Drug	837_DN	(+/-)-blebbistatin; Down 200; 17uM; MCF7; HT_HG-U133A_EA	2.826e-06	0.05068	0.0007148	0.007414	13	196	PIGN,ZNF813,FRS2,KLHL9,EFEMP1,PHTF2,TRIM23,C21orf91,C1orf115,CSE1L,NNT,HERC4,RAB33B
Drug	424_UP	LY294002; Up 200; 0.1uM; MCF7; HG-U133A	2.826e-06	0.05068	0.0007148	0.007414	13	196	PEX13,CLASP2,DDX3X,RINT1,HSPA4,S100PBP,WDR48,CUL4B,PTBP3,NEMP1,WDR47,ZNF20,RNF6
Drug	2976_DN	Condelphine [7633-69-4]; Down 200; 8.8uM; HL60; HT_HG-U133A	2.826e-06	0.05068	0.0007148	0.007414	13	196	SOCS6,MFAP3,KLHL9,MBTPS2,KPNA1,PHTF2,STAM,OPA1,TRIM23,IKZF5,NMD3,PAPOLG,RNF6
Drug	4801_UP	Digitoxigenin [143-62-4]; Up 200; 10.6uM; MCF7; HT_HG-U133A	2.987e-06	0.05356	0.0007148	0.007414	12	167	KLHL24,PEX13,RIOK3,MDM2,DDX3X,SLC38A2,NFYA,FOXJ3,IKZF5,ZNF10,ZBTB11,ZNF654
Drug	1287_UP	Bisoprolol fumarate; Up 200; 9uM; HL60; HT_HG-U133A	2.989e-06	0.05361	0.0007148	0.007414	13	197	MON2,ZSCAN12,NCBP1,FEM1C,MDM2,ADAM10,DDX3X,MFAP3,NFYA,HSPA4,ZNF254,PHTF2,CLIC4
Drug	1825_UP	Heptaminol hydrochloride [543-15-7]; Up 200; 22uM; PC3; HT_HG-U133A	2.989e-06	0.05361	0.0007148	0.007414	13	197	GDAP1,MDM2,ADAM10,MBTPS2,NFYA,SEC23A,NEMP1,RBL2,NUP98,CLIC4,TMEM267,ZNF84,NNT
Drug	7512_DN	CP-863187 [668981-07-5]; Down 200; 10uM; PC3; HT_HG-U133A	2.989e-06	0.05361	0.0007148	0.007414	13	197	RNGTT,RXYLT1,GTF3C3,DDX3X,DHX15,HSPA4,SEC23A,SEL1L,CLIC4,NMD3,MSH6,MTM1,NNT
Drug	6975_DN	prochlorperazine dimaleate salt; Down 200; 10uM; MCF7; HT_HG-U133A	2.989e-06	0.05361	0.0007148	0.007414	13	197	MBTPS2,KPNA1,PTBP3,NEMP1,CPSF6,RBL2,ZNF254,METTL4,BBS10,TARDBP,MSH6,SEC23IP,IRAK4
Drug	5337_DN	Ethaverine hydrochloride [985-13-7]; Down 200; 9.2uM; MCF7; HT_HG-U133A	2.989e-06	0.05361	0.0007148	0.007414	13	197	KLHL24,RNGTT,GDAP1,TSN,SOCS6,DDX3X,MBTPS2,NFYA,HSPA4,CUL4B,RNF6,AKAP10,HERC4
Drug	1603_DN	Sulfisoxazole [127-69-5]; Down 200; 15uM; HL60; HG-U133A	3.161e-06	0.05669	0.000746	0.007737	13	198	CLASP2,MED23,HSPA4,WDR48,YTHDC2,LAMP2,OPA1,IKZF5,PAPOLG,PPP2R1B,PPP2R5C,RBM12,DOP1A
Drug	2032_DN	Diltiazem hydrochloride [33286-22-5]; Down 200; 8.8uM; HL60; HG-U133A	3.342e-06	0.05993	0.0007586	0.007868	13	199	CLASP2,DHX15,SERINC1,KPNA1,TRAPPC11,CPSF6,FASTKD2,ZBTB1,RPRD1A,TMEM168,HS2ST1,NNT,ZNF654
Drug	1600_UP	Nicardipine hydrochloride [54527-84-3]; Up 200; 7.8uM; HL60; HG-U133A	3.342e-06	0.05993	0.0007586	0.007868	13	199	RNGTT,ZNF268,RIOK3,FBXO38,KLHL9,TRAPPC11,RBL2,PPP2R5C,RPRD1A,TMEM267,MTM1,RP2,NNT
Drug	4817_DN	Procyclidine hydrochloride [1508-76-5]; Down 200; 12.4uM; MCF7; HT_HG-U133A	3.342e-06	0.05993	0.0007586	0.007868	13	199	ZSCAN12,MATR3,RIOK3,NFYA,HSPA4,SEC23A,ARMC8,SEL1L,TRAPPC11,ZNF254,ELP1,CSE1L,RP2
Drug	ctd:C044887	beta-methylcholine	5.573e-06	0.09995	0.001249	0.01296	45	1657	PIGN,RNGTT,ORC3,MATR3,NCBP1,RXYLT1,RAB10,KLHL9,INTS2,KLHL7,ARRDC3,HEATR5B,FOXN2,ZBTB33,NRDC,DHX40,SLC35B3,DCP2,BTBD10,NOL11,CLIC4,SLC39A10,PPAT,CGGBP1,ECT2,FOXJ3,AP3M1,ACTR2,ZNF260,SHQ1,NMD3,GTF2E1,INTS6,PDE12,RBM12,RPRD1A,USO1,SAR1B,LEPROTL1,ELP2,MTREX,RPE,NNT,HERC4,HCCS
Drug	2859_DN	Quercetine dihydrate [6151-25-3]; Down 200; 11.8uM; MCF7; HT_HG-U133A	6.476e-06	0.1161	0.001434	0.01487	12	180	MON2,RIOK3,DDX3X,PTBP3,C12orf4,NUP98,PHTF2,PPP2R1B,PCNX4,MTM1,IRAK4,HERC4
Drug	ctd:D000395	Air Pollutants, Occupational	6.566e-06	0.1178	0.001436	0.0149	26	725	ATP6V1C1,SAMD8,COPB2,ZNF267,PIK3R4,FBXO38,RAB10,PIGA,POLR1B,KLHL8,TRAPPC11,C9orf64,POLR2B,CLIC4,ZNF260,GTF2E1,AKTIP,USO1,PCNX4,SEC23IP,TMEM184C,MAPK6,STK38L,RPE,HERC4,NBR1
Drug	6087_DN	Strophanthidin [66-28-4]; Down 200; 9.8uM; MCF7; HT_HG-U133A	7.666e-06	0.1375	0.001656	0.01718	12	183	ZC3H14,MDM2,FBXO38,ARMC8,S100PBP,HSPBAP1,ELP1,PALB2,BBS10,GTF2E1,RBM12,PTCD2
Drug	2353_DN	Metoclopramide monohydrochloride [7232-21-5]; Down 200; 11.8uM; HL60; HT_HG-U133A	9.044e-06	0.1622	0.001931	0.02003	12	186	KLHL24,RNGTT,MATR3,RIOK3,DDX3X,FBXO38,ZNF160,HSPA4,NUP98,CLIC4,RNF6,IRAK4
Drug	5012_UP	Dicloxacillin sodium salt [13412-64-1]; Up 200; 8.2uM; MCF7; HT_HG-U133A	9.55e-06	0.1713	0.002015	0.0209	12	187	ATP6V1C1,MDM2,ADAM10,DDX3X,SNX13,SLC35D1,PTBP3,ZBTB33,PHTF2,HIPK3,C18orf25,PPP2R1B
Drug	1304_UP	Anisomycin [22862-76-6]; Up 200; 15uM; HL60; HT_HG-U133A	9.832e-06	0.1763	0.00205	0.02127	11	157	ZNF267,PEX13,DDX3X,AP1G1,MKLN1,ZNF10,C21orf91,C18orf25,ATP2C1,STK38L,DOP1A
Drug	4835_DN	Nifuroxazide [965-52-6]; Down 200; 14.6uM; MCF7; HT_HG-U133A	1.008e-05	0.1808	0.002054	0.02131	12	188	PTK2,DDX3X,NFYA,HSPA4,SEL1L,RBL2,ELP1,ATF2,PPP2R1B,SEC23IP,PTCD2,HERC4
Drug	1414_DN	Antimycin A [1397-94-0]; Down 200; 7.2uM; HL60; HG-U133A	1.008e-05	0.1808	0.002054	0.02131	12	188	NCBP1,LDAH,DDX3X,PLAA,HSPA4,WDR48,NEMP1,NUP98,MSH6,HS2ST1,SEC23IP,RP2
Drug	2911_DN	Naftopidil dihydrochloride [57149-08-3]; Down 200; 8.6uM; HL60; HT_HG-U133A	1.063e-05	0.1907	0.002119	0.02198	12	189	SOCS6,TTC26,RINT1,HSPA4,ZNF614,SEC23A,OPA1,ATP2C1,RNF6,TMEM184C,STK38L,HCCS
Drug	3788_DN	Chlorambucil [305-03-3]; Down 200; 13.2uM; PC3; HT_HG-U133A	1.063e-05	0.1907	0.002119	0.02198	12	189	ATP6V1C1,RNGTT,SEL1L,PTBP3,SGCB,CANX,PHTF2,CLIC4,HIPK3,PDE12,MTM1,HERC4
Drug	5855_DN	Harmine hydrochloride [343-27-1]; Down 200; 16uM; PC3; HT_HG-U133A	1.122e-05	0.2012	0.002211	0.02293	12	190	CLASP2,DDX3X,SLC35D1,KLHL9,PIGA,PLAA,NFYA,NEMP1,NUDT21,NUP98,FASTKD2,RBM12
Drug	7503_DN	trichostatin A, Streptomyces sp.; Down 200; 1uM; PC3; HT_HG-U133A	1.183e-05	0.2121	0.002257	0.0234	12	191	GIN1,DDX3X,DHX15,ABITRAM,HSPA4,RCHY1,ZBTB1,MSH6,RNF6,TMEM168,PCNX4,PCMTD2
Drug	4124_DN	Oxamniquine [21738-42-1]; Down 200; 14.4uM; MCF7; HT_HG-U133A	1.183e-05	0.2121	0.002257	0.0234	12	191	KLHL24,ATP6V1C1,MDM2,ADAM10,DDX3X,SNX13,MBTPS2,HSPA4,PTBP3,PHTF2,RNF6,TTC30A
Drug	6718_DN	Estradiol-17 beta [50-28-2]; Down 200; 14.6uM; PC3; HT_HG-U133A	1.183e-05	0.2121	0.002257	0.0234	12	191	ATP6V1C1,PTK2,DDX3X,SEC23A,PTBP3,ZBTB33,NUDT21,CANX,PHTF2,ZBTB1,IRAK4,TTC30A
Drug	2766_DN	Pseudopelletierine hydrochloride [6164-62-1]; Down 200; 21uM; MCF7; HT_HG-U133A	1.247e-05	0.2236	0.002329	0.02415	12	192	ATP6V1C1,GDAP1,DDX3X,SNX13,FBXO38,MFAP3,MBTPS2,NFYA,HSPA4,PHTF2,TRIM23,RNF6
Drug	4342_DN	Fludrocortisone acetate [514-36-3]; Down 200; 9.4uM; PC3; HT_HG-U133A	1.247e-05	0.2236	0.002329	0.02415	12	192	ATP6V1C1,GDAP1,SOCS6,ADAM10,DDX3X,ZNF614,SEC23A,PHTF2,CLIC4,TRIM23,HIPK3,RNF6
Drug	6716_DN	Glycocholic acid [475-31-0]; Down 200; 8.6uM; PC3; HT_HG-U133A	1.313e-05	0.2356	0.002341	0.02428	12	193	SOCS6,DDX3X,MBTPS2,SEC23A,CUL4B,PTBP3,CANX,PHTF2,TRIM23,MSH6,PDE12,IRAK4
Drug	6209_UP	Tetrahydroalstonine [6474-90-4]; Up 200; 11.4uM; MCF7; HT_HG-U133A	1.313e-05	0.2356	0.002341	0.02428	12	193	ZSCAN12,ZNF268,ZNF813,PLAA,MED23,SEL1L,CUL4B,FOXN2,IKZF5,PPP2R1B,ATP2C1,PDE12
Drug	3925_DN	Deltaline [6836-11-9]; Down 200; 7.8uM; MCF7; HT_HG-U133A	1.313e-05	0.2356	0.002341	0.02428	12	193	ATP6V1C1,GDAP1,MDM2,SLC35D1,MFAP3,SEC23A,PTBP3,FOXN2,PHTF2,HIPK3,CSE1L,HERC4
Drug	1294_UP	Hesperidin [520-26-3]; Up 200; 6.6uM; HL60; HT_HG-U133A	1.383e-05	0.2481	0.002341	0.02428	12	194	NCBP1,ADAM10,PTK2,DDX3X,MFAP3,TWSG1,SEC23A,WDR48,FOXN2,RCHY1,CLIC4,HIPK3
Drug	1741_DN	Laudanosine (R,S) [1699-51-0]; Down 200; 11.2uM; HL60; HG-U133A	1.383e-05	0.2481	0.002341	0.02428	12	194	ZC3H14,DDX3X,DHX15,SEC23A,KPNA1,TRAPPC11,PHTF2,SHQ1,MSH6,LRPPRC,SF3B1,SAR1B
Drug	7035_DN	Disopyramide [3737-09-5]; Down 200; 11.8uM; MCF7; HT_HG-U133A	1.457e-05	0.2612	0.002341	0.02428	12	195	RNGTT,GDAP1,MDM2,DDX3X,EFEMP1,NFYA,HSPA4,PTBP3,ZNF254,TRIM23,RNF6,RAB33B
Drug	2929_DN	Fursultiamine Hydrochloride [2105-43-3]; Down 200; 9.2uM; HL60; HT_HG-U133A	1.457e-05	0.2612	0.002341	0.02428	12	195	RNGTT,ADAM10,TTC26,DDX3X,SLC39A6,ZNF468,HSPA4,SEL1L,PTBP3,ZDHHC17,RNF6,IRAK4
Drug	4794_UP	Diflunisal [22494-42-4]; Up 200; 16uM; MCF7; HT_HG-U133A	1.457e-05	0.2612	0.002341	0.02428	12	195	PIGN,BACH1,MDM2,PTBP3,SGCB,IKZF5,ZNF10,ATP2C1,MTM1,ZNF83,NNT,HERC4
Drug	4961_DN	Tocopherol (R,S) [10191-41-0]; Down 200; 9.2uM; MCF7; HT_HG-U133A	1.457e-05	0.2612	0.002341	0.02428	12	195	RNGTT,FRS2,MDM2,ADAM10,DDX3X,SNX13,NFYA,SEC23A,NUDT21,ZDHHC17,PPP2R5C,RNF6
Drug	1431_DN	Oxymetazoline hydrochloride [2315-02-8]; Down 200; 13.4uM; HL60; HG-U133A	1.457e-05	0.2612	0.002341	0.02428	12	195	RNGTT,SEC24A,RIOK3,ADAM10,DHX15,SPIN1,WDR48,RBL2,RANBP6,LAMP2,MTM1,TMEM184C
Drug	2031_DN	Hesperetin [520-33-2]; Down 200; 13.2uM; HL60; HG-U133A	1.533e-05	0.275	0.002341	0.02428	12	196	EPS15,KLHL24,MATR3,TSN,CLASP2,DDX3X,DHX15,NFYA,HSPA4,IKZF5,ATP2C1,NNT
Drug	1326_UP	Muramic acid, N-acetyl [10597-89-4]; Up 200; 13.6uM; HL60; HT_HG-U133A	1.533e-05	0.275	0.002341	0.02428	12	196	MON2,SEC24A,TTC26,DDX3X,ZNF614,PTBP3,SGCB,ZNF254,IKZF5,HIPK3,PPP2R1B,SEC23IP
Drug	2631_DN	Dequalinium dichloride [522-51-0]; Down 200; 7.6uM; MCF7; HT_HG-U133A	1.533e-05	0.275	0.002341	0.02428	12	196	RNGTT,DDX3X,NFYA,CUL4B,CANX,NUP98,BBS10,C21orf91,MSH6,C1orf115,RNF6,HS2ST1
Drug	5359_DN	Adenosine 5'-monophosphate monohydrate [18422-05-4]; Down 200; 11uM; MCF7; HT_HG-U133A	1.533e-05	0.275	0.002341	0.02428	12	196	ATP6V1C1,RIOK3,LDAH,KLHL9,WDR48,SEL1L,PTBP3,METTL4,TRIM23,C1orf115,RP2,HERC4
Drug	4782_DN	Canavanine sulfate monohydrate (L,+) [206996-57-8]; Down 200; 13.6uM; MCF7; HT_HG-U133A	1.533e-05	0.275	0.002341	0.02428	12	196	RIOK3,DHX15,HSPA4,TRAPPC11,COPB1,CLIC4,ZBTB1,TRIM23,SEC23IP,DPY19L4,PCMTD2,RP2
Drug	1921_DN	Metronidazole [443-48-1]; Down 200; 23.4uM; PC3; HG-U133A	1.533e-05	0.275	0.002341	0.02428	12	196	RNGTT,WDR48,UBR2,RANBP6,LAMP2,SHOC2,CREBL2,C1orf115,GORASP2,TMEM267,STK38L,CDC23
Drug	ctd:D010416	Pentachlorophenol	1.534e-05	0.2752	0.002341	0.02428	41	1510	HIF1A,MATR3,MIER3,PSMD5,SOCS6,MDM2,PTK2,DDX1,ZUP1,DDX5,SLC35D1,DHX15,PLAA,SPIN1,NFYA,HSPA4,PUS7,CUL2,DCP2,NOL11,UBA2,CLIC4,E2F6,IDE,ATE1,PPAT,AP3M1,C21orf91,PPP2R1B,GTF2E1,INTS6,AKTIP,PPP2R5C,CSE1L,USO1,PCNX4,TBK1,RLIM,TMED8,ZW10,STK38L
Drug	3064_DN	Xamoterol hemifumarate [73210-73-8]; Down 200; 5uM; HL60; HT_HG-U133A	1.613e-05	0.2893	0.002341	0.02428	12	197	RNGTT,MDM2,DDX3X,FBXO38,SEL1L,PTBP3,MCPH1,PHTF2,TRIM23,HIPK3,ZNF10,PDE12
Drug	5689_DN	Crotamiton [483-63-6]; Down 200; 19.6uM; MCF7; HT_HG-U133A	1.613e-05	0.2893	0.002341	0.02428	12	197	ATP6V1C1,RNGTT,MDM2,ADAM10,PLAA,NFYA,ATL2,CUL4B,PTBP3,ZNF254,IKZF5,CSE1L
Drug	3043_DN	Niacin [59-67-6]; Down 200; 32.4uM; HL60; HT_HG-U133A	1.613e-05	0.2893	0.002341	0.02428	12	197	RNGTT,GDAP1,TTC26,KLHL9,PTBP3,MCPH1,TRIM23,THADA,PDE12,CSE1L,HERC4,DOP1A
Drug	6251_DN	Nicergoline; Down 200; 8.2uM; MCF7; HT_HG-U133A	1.613e-05	0.2893	0.002341	0.02428	12	197	RNGTT,PEX13,FEM1C,LDAH,RINT1,PIGA,ZNF468,TRAPPC11,TRIM23,MSH6,PPP2R1B,PCNX4
Drug	1611_UP	Zaprinast [37762-06-4]; Up 200; 14.8uM; HL60; HG-U133A	1.697e-05	0.3043	0.002341	0.02428	12	198	RNGTT,RIOK3,ADAM10,PTBP3,NUDT21,RBL2,LAMP2,ECT2,HS2ST1,RP2,NNT,PRRC1
Drug	6915_UP	SB 203580; Up 200; 1uM; MCF7; HT_HG-U133A	1.697e-05	0.3043	0.002341	0.02428	12	198	ATP6V1C1,RNGTT,ZNF267,LDAH,ZNF468,OPA1,WDR47,GTF2E1,PPP2R5C,PCNX4,MTM1,ZNF83
Drug	1103_DN	colcemid; Down 200; 11.7uM; MCF7; HT_HG-U133A_EA	1.697e-05	0.3043	0.002341	0.02428	12	198	ZC3H14,MDM2,TTC26,NFYA,SEC23A,SEL1L,ATG5,PTBP3,NEMP1,CANX,MSH6,SF3B1
Drug	3995_DN	Fluvoxamine maleate [61718-82-9]; Down 200; 9.2uM; PC3; HT_HG-U133A	1.697e-05	0.3043	0.002341	0.02428	12	198	RNGTT,ZNF268,MDM2,SNX13,NXPE3,MBTPS2,SEL1L,ELP1,TRIM23,C18orf25,CSE1L,NNT
Drug	6559_DN	GSK-3 Inhibitor IX; Down 200; 0.5uM; PC3; HT_HG-U133A	1.697e-05	0.3043	0.002341	0.02428	12	198	RIOK3,GFPT1,PTK2,TTC26,NXPE3,EFEMP1,HSPA4,NEMP1,YTHDC2,TRIM23,NMD3,HERC4
Drug	6246_DN	Saquinavir mesylate [149845-06-7]; Down 200; 5.2uM; MCF7; HT_HG-U133A	1.697e-05	0.3043	0.002341	0.02428	12	198	RNGTT,GDAP1,RIOK3,MBTPS2,KLHL7,HSPA4,SEC23A,WDR48,NUDT21,TRIM23,RNF6,NNT
Drug	7197_UP	Isoniazid [54-85-3]; Up 200; 29.2uM; MCF7; HT_HG-U133A	1.697e-05	0.3043	0.002341	0.02428	12	198	NCBP1,CLASP2,ADAM10,MBTPS2,ZNF468,HSPA4,SEL1L,PTBP3,TRIM23,ZNF10,CSE1L,RNF6
Drug	6208_DN	Dienestrol [84-17-3]; Down 200; 15uM; MCF7; HT_HG-U133A	1.697e-05	0.3043	0.002341	0.02428	12	198	KLHL24,SOCS6,MDM2,KLHL9,EFEMP1,NFYA,WDR48,PTBP3,ZNF254,RBM12,SEC23IP,NNT
Drug	4991_DN	Glipizide [29094-61-9]; Down 200; 9uM; MCF7; HT_HG-U133A	1.697e-05	0.3043	0.002341	0.02428	12	198	KLHL24,ADAM10,DDX3X,SNX13,MFAP3,KLHL9,MBTPS2,SEL1L,PAPOLG,CSE1L,RNF6,RP2
Drug	3033_DN	Phthalylsulfathiazole [85-73-4]; Down 200; 10uM; HL60; HT_HG-U133A	1.697e-05	0.3043	0.002341	0.02428	12	198	RNGTT,ZNF813,NFYA,DCAF17,PTBP3,FOXN2,PHTF2,FOXJ3,HIPK3,ZNF10,CSE1L,NNT
Drug	7464_DN	Nitrocaramiphen hydrochloride; Down 200; 10.8uM; MCF7; HT_HG-U133A	1.697e-05	0.3043	0.002341	0.02428	12	198	APH1B,RIOK3,LDAH,NFYA,ATL2,WDR48,NUP98,ZBTB1,TRIM23,ZW10,HERC4,RAB33B
Drug	1943_DN	Midecamycin [35457-80-8]; Down 200; 5uM; PC3; HG-U133A	1.697e-05	0.3043	0.002341	0.02428	12	198	ATP6V1C1,TSN,DDX3X,SEC23A,S100PBP,WDR48,SHOC2,FOXJ3,MSH6,ATP2C1,SEC23IP,STK38L
Drug	6204_DN	Meprylcaine hydrochloride [956-03-6]; Down 200; 14.8uM; MCF7; HT_HG-U133A	1.697e-05	0.3043	0.002341	0.02428	12	198	MDM2,LDAH,DDX3X,SEC23A,WDR48,TRIM23,IKZF5,C18orf25,RNF6,HS2ST1,AKAP10,ZNF83
Drug	1290_UP	Droperidol [548-73-2]; Up 200; 10.6uM; HL60; HT_HG-U133A	1.784e-05	0.32	0.002353	0.02441	12	199	APH1B,RNGTT,NCBP1,ADAM10,DDX3X,NFYA,ZNF468,ATL2,SEC23A,CLIC4,HIPK3,ZNF10
Drug	1890_DN	Amiloride hydrochloride dihydrate [17440-83-4]; Down 200; 13.2uM; PC3; HG-U133A	1.784e-05	0.32	0.002353	0.02441	12	199	PIGN,RIOK3,RXYLT1,SLC35D1,MKLN1,HSPA4,KPNA1,LAMP2,ATF2,OPA1,PCNX4,DOP1A
Drug	6477_DN	Promethazine hydrochloride [58-33-3]; Down 200; 12.4uM; MCF7; HT_HG-U133A	1.784e-05	0.32	0.002353	0.02441	12	199	MFAP3,NFYA,NUDT21,YTHDC2,ZBTB1,TRIM23,ZNF10,ZNF20,MTM1,AKAP10,STK38L,HERC4
Drug	1911_DN	Acebutolol hydrochloride [34381-68-5]; Down 200; 10.8uM; PC3; HG-U133A	1.784e-05	0.32	0.002353	0.02441	12	199	BACH1,PEX13,PTK2,TTC26,PLAA,MED23,NUDT21,LAMP2,NMD3,C21orf91,ATP2C1,STK38L
Drug	7471_DN	Norethynodrel [68-23-5]; Down 200; 13.4uM; MCF7; HT_HG-U133A	1.784e-05	0.32	0.002353	0.02441	12	199	SOCS6,MDM2,SNX13,FBXO38,NFYA,TWSG1,ATL2,PTBP3,HSPBAP1,ZBTB1,TRIM23,C21orf91
Drug	5347_DN	Idazoxan hydrochloride [79944-56-2]; Down 200; 16.6uM; MCF7; HT_HG-U133A	1.784e-05	0.32	0.002353	0.02441	12	199	MBTPS2,NFYA,SEC23A,KPNA1,PTBP3,ZBTB1,BBS10,C21orf91,THADA,TMEM168,HS2ST1,MTM1
Drug	1939_UP	Ciprofloxacin hydrochloride [93107-08-5]; Up 200; 10.8uM; PC3; HG-U133A	1.876e-05	0.3364	0.002455	0.02547	12	200	ZC3H14,KLHL24,RIOK3,SOCS6,KLHL7,ZNF468,MED23,CUL2,TMEM267,HS2ST1,MTM1,RP2
Drug	ctd:C049325	1,2-dithiol-3-thione	2.423e-05	0.4345	0.003149	0.03266	27	829	HIF1A,MATR3,COPB2,PSMD5,PTK2,ZUP1,DDX3X,FBXO38,RAB10,PLAA,HSPA4,SEC23A,RBL2,CANX,LAMP2,ATE1,PPAT,NCOA4,AP3M1,ATP2C1,SF3B1,TBK1,PCMTD2,TBC1D23,MAPK6,YTHDF3,RAB33B
Drug	5640_DN	Digoxigenin [1672-46-4]; Down 200; 10.2uM; MCF7; HT_HG-U133A	3.526e-05	0.6323	0.004549	0.04718	11	180	ZC3H14,ZSCAN12,PLAA,ARMC8,HSPBAP1,ELP1,PALB2,GTF2E1,RBM12,IRAK4,PTCD2
Drug	ctd:D020111	Chlorodiphenyl (54% Chlorine)	3.707e-05	0.6648	0.004749	0.04925	43	1678	ZC3H14,ATP6V1C1,MATR3,COPB2,FEM1C,ADAM10,DDX1,DDX3X,DDX5,DHX15,RAB10,RINT1,PIGA,WDR75,KLHL7,SERINC1,SPIN1,SLC39A6,DLD,TWSG1,HSPA4,SEC23A,CUL2,DHX40,VPS4B,LAMP2,TVP23B,IDE,SLC39A10,NCOA4,ACTR2,IKZF5,TARDBP,INTS6,CSE1L,RNF6,USO1,SEC23IP,TMEM184C,AKAP10,ELP2,NBR1,CDC23
Drug	1280_UP	Ritodrine hydrochloride [23239-51-2]; Up 200; 12.4uM; HL60; HT_HG-U133A	3.901e-05	0.6997	0.004963	0.05147	11	182	NCBP1,ADAM10,GFPT1,PTK2,DDX3X,NFYA,SEC23A,SGCB,ZBTB1,TRIM23,HERC4
Drug	1344_DN	Adamantamine fumarate [80789-67-9]; Down 200; 9.6uM; HL60; HT_HG-U133A	4.311e-05	0.7732	0.005407	0.05608	11	184	ATP6V1C1,RIOK3,ADAM10,PTK2,DDX3X,SEL1L,NEMP1,CANX,CLIC4,SF3B1,PRRC1
Drug	1765_UP	Ellipticine [519-23-3]; Up 200; 16.2uM; HL60; HG-U133A	4.311e-05	0.7732	0.005407	0.05608	11	184	CCP110,KLHL24,RNGTT,PIK3R4,HSPA4,SHQ1,PPP2R1B,SEC23IP,ZBTB11,STK38L,HSPA14
Drug	ctd:C010327	salinomycin	4.53e-05	0.8124	0.005642	0.05851	11	185	HIF1A,COPB2,GTF3C3,PTK2,PLAA,INTS2,CLTC,C9orf64,STAM,HS2ST1,MTREX
Drug	5000_DN	Amethopterin (R,S) [59-05-2]; Down 200; 8.8uM; MCF7; HT_HG-U133A	4.758e-05	0.8533	0.005885	0.06103	11	186	RNGTT,PTK2,DDX3X,SLC35D1,ZNF468,PTBP3,NUP98,METTL4,ECT2,RBM12,HERC4
Drug	ctd:C001277	geldanamycin	4.918e-05	0.8821	0.006042	0.06266	16	371	KLHL24,HIF1A,C5orf22,RNGTT,MATR3,MDM2,PTK2,DDX3X,SENP1,SLC39A6,HSPA4,PTBP3,ICE2,PHTF2,ACTR2,SAR1B
Drug	5010_DN	Prochlorperazine dimaleate [84-02-6]; Down 200; 6.6uM; MCF7; HT_HG-U133A	4.995e-05	0.8959	0.006053	0.06278	11	187	ATP6V1C1,RNGTT,FRS2,DDX3X,MFAP3,NFYA,HSPA4,SEC23A,MSH6,RNF6,HERC4
Drug	7051_DN	Alsterpaullone; Down 200; 10uM; MCF7; HT_HG-U133A	4.995e-05	0.8959	0.006053	0.06278	11	187	GIN1,SLC38A2,KLHL9,MED23,S100PBP,UBR2,RANBP6,MSH6,GTF2E1,AKAP10,ZNF84
Drug	ctd:C045950	propiconazole	5.151e-05	0.9238	0.0062	0.06431	42	1647	ZC3H14,KLHL24,PEX13,ZNF25,GFPT1,DDX1,SLC35D1,DHX15,THAP2,SLC38A2,PIGA,PLAA,AP1G1,MTX3,MKLN1,SLC39A6,ARRDC3,TMEM41B,ATG5,UBR2,FOXN2,COPB1,CPSF6,RBL2,CANX,CLIC4,STAM,NCOA4,CGGBP1,ECT2,SLC30A6,GTF2E1,PDE12,RNF6,USO1,TBK1,SAR1B,DDX3Y,PCMTD2,MAPK6,NNT,NBR1
Drug	7078_DN	Alsterpaullone; Down 200; 10uM; PC3; HT_HG-U133A	5.243e-05	0.9403	0.006269	0.06502	11	188	FEM1C,DDX3X,SLC38A2,KLHL9,ZNF468,MED23,FBXO34,S100PBP,RCHY1,HSPBAP1,WDR47
Drug	1769_DN	Ipratropium bromide [22254-24-6]; Down 200; 9.8uM; HL60; HG-U133A	5.501e-05	0.9866	0.006436	0.06675	11	189	ZC3H14,ATP6V1C1,BACH1,ZNF267,RIOK3,TRAPPC11,CANX,CLIC4,MSH6,GORASP2,NNT
Drug	5254_DN	Lorglumide sodium salt [97964-56-2]; Down 200; 8.4uM; MCF7; HT_HG-U133A	5.501e-05	0.9866	0.006436	0.06675	11	189	KLHL24,NCBP1,MDM2,DDX3X,HSPA4,ZNF614,SGCB,PHTF2,TRIM23,AKAP10,HERC4
Drug	2619_DN	Thioguanosine [85-31-4]; Down 200; 12.6uM; MCF7; HT_HG-U133A	5.77e-05	1	0.006436	0.06675	11	190	SEC24A,PIK3R4,NFYA,ARMC8,WDR48,UBR2,NUP98,METTL4,TRIM23,MSH6,HERC4
Drug	7053_DN	thapsigargin; Down 200; 0.1uM; MCF7; HT_HG-U133A	5.77e-05	1	0.006436	0.06675	11	190	ATP6V1C1,GDAP1,FRS2,DDX3X,MFAP3,KLHL7,PHTF2,PPP2R1B,ZNF20,C1orf115,RBM12
Drug	2861_DN	Piracetam [7491-74-9]; Down 200; 28.2uM; MCF7; HT_HG-U133A	6.051e-05	1	0.006436	0.06675	11	191	RNGTT,SOCS6,MDM2,PHKB,MBTPS2,HSPA4,SEL1L,SGCB,HIPK3,CSE1L,RNF6
Drug	5607_DN	Meclozine dihydrochloride [1104-22-9]; Down 200; 8.6uM; MCF7; HT_HG-U133A	6.051e-05	1	0.006436	0.06675	11	191	PIGN,GDAP1,MDM2,SNX13,SLC35D1,FBXO38,MFAP3,ZNF254,PHTF2,YTHDC2,RNF6
Drug	6142_DN	Dorzolamide hydrochloride [130693-82-2]; Down 200; 11uM; HL60; HT_HG-U133A	6.051e-05	1	0.006436	0.06675	11	191	ATP6V1C1,RNGTT,RIOK3,DDX3X,FBXO38,NFYA,ATL2,SEL1L,ZDHHC17,PPP2R1B,RNF6
Drug	6173_DN	2-propylpentanoic acid; Down 200; 200uM; HL60; HT_HG-U133A	6.051e-05	1	0.006436	0.06675	11	191	RIOK3,DDX3X,MBTPS2,NFYA,HSPA4,SEL1L,NEMP1,NUDT21,MSH6,RNF6,HERC4
Drug	6710_DN	Diltiazem hydrochloride [33286-22-5]; Down 200; 8.8uM; PC3; HT_HG-U133A	6.051e-05	1	0.006436	0.06675	11	191	ATP6V1C1,GDAP1,TSN,PTK2,DDX3X,MBTPS2,HSPA4,CANX,PHTF2,TRIM23,IKZF5
Drug	4168_DN	Sanguinarine [2447-54-3]; Down 200; 12uM; MCF7; HT_HG-U133A	6.051e-05	1	0.006436	0.06675	11	191	CCP110,BACH1,SOCS6,MDM2,ADAM10,SLC35D1,MBTPS2,CUL2,PTBP3,YTHDC2,NNT
Drug	1937_DN	Azacyclonol [115-46-8]; Down 200; 15uM; PC3; HG-U133A	6.343e-05	1	0.006436	0.06675	11	192	MATR3,TSN,PTK2,KLHL7,HSPA4,DCP2,RANBP6,YTHDC2,LAMP2,ECT2,HS2ST1
Drug	6164_DN	aspirin, USP; Down 200; 100uM; HL60; HT_HG-U133A	6.343e-05	1	0.006436	0.06675	11	192	SOCS6,DDX3X,SNX13,ZNF614,WDR48,PTBP3,VPS8,ZDHHC17,TRIM23,IKZF5,SEC23IP
Drug	1580_UP	Furosemide [54-31-9]; Up 200; 12uM; HL60; HG-U133A	6.343e-05	1	0.006436	0.06675	11	192	KLHL24,BACH1,RIOK3,PTK2,MBTPS2,LAMP2,PPP2R5C,ATP2C1,RBM12,SEC23IP,DPY19L4
Drug	6752_DN	Pipemidic acid [51940-44-4]; Down 200; 13.2uM; PC3; HT_HG-U133A	6.343e-05	1	0.006436	0.06675	11	192	RNGTT,MDM2,PTK2,DDX3X,SEC23A,NUDT21,CANX,PHTF2,CLIC4,MSH6,RNF6
Drug	4830_DN	Piperine [94-62-2]; Down 200; 14uM; MCF7; HT_HG-U133A	6.343e-05	1	0.006436	0.06675	11	192	SEC24A,LDAH,DDX3X,SEC23A,CUL2,NEMP1,IKZF5,MSH6,RBM12,PTCD2,NNT
Drug	1778_DN	Berberine chloride [633-65-8]; Down 200; 10.8uM; HL60; HG-U133A	6.343e-05	1	0.006436	0.06675	11	192	MATR3,KPNA1,WDR48,PTBP3,STAM,UBR7,PAPOLG,PPP2R1B,PCMTD2,NNT,PRRC1
Drug	3526_DN	Tridihexethyl chloride; Down 200; 11.4uM; MCF7; HT_HG-U133A	6.343e-05	1	0.006436	0.06675	11	192	RNGTT,GDAP1,SOCS6,MDM2,DDX3X,PHKB,HSPA4,PTBP3,TRIM23,RNF6,AKAP10
Drug	ctd:D003703	Demecolcine	6.454e-05	1	0.006436	0.06675	27	878	KLHL24,TP53INP1,MATR3,NCBP1,CLASP2,MDM2,SERINC1,NFYA,ARRDC3,TENT2,ARMC8,S100PBP,UBR2,CPSF6,BTBD10,PHTF2,YTHDC2,ZBTB1,C18orf25,MSH6,RBM12,SLC16A14,HS2ST1,AKAP10,GFM1,HSPA14,YTHDF3
Drug	ctd:D014750	Vincristine	6.545e-05	1	0.006436	0.06675	33	1182	TP53INP1,MATR3,PEX13,NCBP1,CLASP2,MDM2,GTF3C3,SENP1,MKLN1,POLR1B,PITPNB,TENT2,ARMC8,ZNF823,LRRC8C,UBR2,CPSF6,PHTF2,YTHDC2,FASTKD2,ACTR2,THADA,RBM12,RPRD1A,TMEM267,NAPB,SLC16A14,HS2ST1,AKAP10,GFM1,NNT,HSPA14,YTHDF3
Drug	544_UP	radicicol; Up 200; 0.1uM; HL60; HG-U133A	6.647e-05	1	0.006436	0.06675	11	193	APH1B,KLHL24,SEC24A,GTF3C3,HSPA4,SEL1L,STAM,C18orf25,PPP2R1B,ATP2C1,IRAK4
Drug	1268_DN	Carbetapentane citrate [23142-01-0]; Down 200; 7.6uM; HL60; HT_HG-U133A	6.647e-05	1	0.006436	0.06675	11	193	RIOK3,ADAM10,DDX3X,WDR48,PTBP3,NEMP1,CANX,CLIC4,YTHDC2,MTM1,SEC23IP
Drug	2563_DN	Mephentermine hemisulfate [1212-72-2]; Down 200; 9.4uM; HL60; HT_HG-U133A	6.647e-05	1	0.006436	0.06675	11	193	MON2,ATP6V1C1,TSN,DDX3X,PLAA,MBTPS2,HSPA4,PTBP3,RCHY1,IDE,RNF6
Drug	3213_DN	Colchicine [64-86-8]; Down 200; 10uM; MCF7; HT_HG-U133A	6.647e-05	1	0.006436	0.06675	11	193	GDAP1,MDM2,ADAM10,DDX3X,FBXO38,MBTPS2,NFYA,PTBP3,PDE12,RNF6,TTC30A
Drug	1982_DN	Hexamethonium dibromide dihydrate [55-97-0]; Down 200; 10uM; HL60; HG-U133A	6.647e-05	1	0.006436	0.06675	11	193	RIOK3,CLASP2,FBXO38,SERINC1,WDR48,RBL2,RANBP6,CREBL2,ATP2C1,RPRD1A,TMEM184C
Drug	5075_DN	Hydrastinine hydrochloride [4884-68-8]; Down 200; 16.4uM; PC3; HT_HG-U133A	6.963e-05	1	0.006436	0.06675	11	194	GDAP1,RIOK3,SOCS6,MDM2,DDX3X,MBTPS2,NFYA,CLIC4,IKZF5,C21orf91,RNF6
Drug	4341_DN	Vincamine [1617-90-9]; Down 200; 11.2uM; PC3; HT_HG-U133A	6.963e-05	1	0.006436	0.06675	11	194	ATP6V1C1,ADAM10,DDX3X,MBTPS2,SEC23A,WDR48,PTBP3,PHTF2,TRIM23,HIPK3,RNF6
Drug	5342_DN	Carbachol [51-83-2]; Down 200; 21.8uM; MCF7; HT_HG-U133A	6.963e-05	1	0.006436	0.06675	11	194	ZNF813,PEX13,RIOK3,MDM2,PTK2,KLHL9,ZNF468,SEC23A,WDR48,PPP2R1B,ZW10
Drug	1269_UP	Clomiphene citrate (Z,E) [50-41-9]; Up 200; 6.6uM; HL60; HT_HG-U133A	6.963e-05	1	0.006436	0.06675	11	194	NCBP1,TSN,MDM2,ADAM10,DDX3X,MFAP3,ATL2,CLIC4,ZDHHC17,FOXJ3,RNF6
Drug	2784_DN	Retrorsine [480-54-6]; Down 200; 11.4uM; MCF7; HT_HG-U133A	6.963e-05	1	0.006436	0.06675	11	194	KLHL24,ATP6V1C1,NCBP1,SOCS6,PTK2,NFYA,SGCB,PHTF2,YTHDC2,HIPK3,RNF6
Drug	5696_DN	Androsterone [53-41-8]; Down 200; 13.8uM; MCF7; HT_HG-U133A	6.963e-05	1	0.006436	0.06675	11	194	RNGTT,NCBP1,MDM2,ADAM10,NXPE3,PHKB,MBTPS2,NFYA,PTBP3,MTM1,AKAP10
Drug	4772_DN	Galanthamine hydrobromide [1953-04-4]; Down 200; 10.8uM; MCF7; HT_HG-U133A	6.963e-05	1	0.006436	0.06675	11	194	RNGTT,SOCS6,SLC39A6,SEC23A,UBR2,TRAPPC11,RBL2,CLIC4,YTHDC2,BBS10,TMEM184C
Drug	2891_DN	Scoulerine [6451-73-6]; Down 200; 12.2uM; MCF7; HT_HG-U133A	6.963e-05	1	0.006436	0.06675	11	194	PIGN,ZSCAN12,MDM2,ADAM10,SNX13,MFAP3,KLHL9,ZNF614,TRAPPC11,PHTF2,FASTKD2
Drug	7444_DN	Azaguanine-8 [134-58-7]; Down 200; 26.2uM; MCF7; HT_HG-U133A	7.292e-05	1	0.006436	0.06675	11	195	RNGTT,DDX3X,MBTPS2,WDR48,SEL1L,CUL4B,VPS8,CLIC4,TRIM23,C1orf115,HERC4
Drug	5339_DN	Hemicholinium bromide [312-45-8]; Down 200; 7uM; MCF7; HT_HG-U133A	7.292e-05	1	0.006436	0.06675	11	195	CLASP2,MDM2,PTBP3,UBR2,NEMP1,CLIC4,C21orf91,PPP2R1B,PPP2R5C,RNF6,HERC4
Drug	4994_DN	Clomiphene citrate (Z,E) [50-41-9]; Down 200; 6.6uM; MCF7; HT_HG-U133A	7.292e-05	1	0.006436	0.06675	11	195	RNGTT,MDM2,DDX3X,MBTPS2,NFYA,CUL2,NUP98,ZDHHC17,PAPOLG,RNF6,ZW10
Drug	1582_DN	Bambuterol hydrochloride [81732-46-9]; Down 200; 10uM; HL60; HG-U133A	7.292e-05	1	0.006436	0.06675	11	195	LDAH,DHX15,FBXO38,AP1G1,DLD,MED23,CANX,LAMP2,IKZF5,HS2ST1,PCMTD2
Drug	1053_DN	prochlorperazine dimaleate salt; Down 200; 10uM; MCF7; HT_HG-U133A_EA	7.292e-05	1	0.006436	0.06675	11	195	RNGTT,EFEMP1,PLAA,NFYA,WDR48,PTBP3,PHTF2,ZBTB1,UBR7,PTCD2,HERC4
Drug	5305_DN	Cisapride [81098-60-4]; Down 200; 8.6uM; MCF7; HT_HG-U133A	7.292e-05	1	0.006436	0.06675	11	195	GDAP1,MDM2,LDAH,MBTPS2,ZNF468,ARMC8,ATG5,YTHDC2,RBM12,RP2,NNT
Drug	1293_UP	Fusidic acid sodium salt [751-94-0]; Up 200; 7.4uM; HL60; HT_HG-U133A	7.292e-05	1	0.006436	0.06675	11	195	ATP6V1C1,GIN1,NCBP1,ADAM10,DDX3X,HSPA4,SEL1L,CUL4B,CLIC4,FOXJ3,HIPK3
Drug	4646_DN	Meclozine dihydrochloride [1104-22-9]; Down 200; 8.6uM; PC3; HT_HG-U133A	7.292e-05	1	0.006436	0.06675	11	195	GDAP1,DDX3X,FBXO38,MBTPS2,NFYA,PHTF2,YTHDC2,FOXJ3,MSH6,MTM1,NNT
Drug	1303_DN	Arecoline hydrobromide [300-08-3]; Down 200; 17uM; HL60; HT_HG-U133A	7.292e-05	1	0.006436	0.06675	11	195	TSN,ADAM10,DDX3X,HSPA4,WDR48,NEMP1,CLIC4,MSH6,PPP2R1B,AKAP10,ZNF83
Drug	4139_UP	Nadolol [42200-33-9]; Up 200; 13uM; MCF7; HT_HG-U133A	7.292e-05	1	0.006436	0.06675	11	195	ZNF155,SEC24A,RXYLT1,MDM2,MED23,ZBTB33,ZDHHC17,THAP9,TRIM23,PAPOLG,RBM12
Drug	6754_DN	Fusidic acid sodium salt [751-94-0]; Down 200; 7.4uM; PC3; HT_HG-U133A	7.292e-05	1	0.006436	0.06675	11	195	GDAP1,FRS2,MDM2,PLAA,PTBP3,CANX,PHTF2,YTHDC2,FASTKD2,FOXJ3,HERC4
Drug	1132_DN	BW-B 70C; Down 200; 31.6uM; MCF7; HT_HG-U133A_EA	7.292e-05	1	0.006436	0.06675	11	195	RINT1,ZNF468,ZNF160,CUL4B,VPS4B,DCP2,NUP98,PHTF2,TMEM168,SEC23IP,HERC4
Drug	4763_UP	Karakoline [39089-30-0]; Up 200; 10.6uM; MCF7; HT_HG-U133A	7.292e-05	1	0.006436	0.06675	11	195	BACH1,MDM2,ADAM10,SNX13,MFAP3,MBTPS2,CUL4B,PTBP3,PHTF2,HIPK3,RNF6
Drug	CID000445265	AC1L9HP3	7.488e-05	1	0.006436	0.06675	7	76	MON2,PIGN,COPB2,PIK3R4,CLTC,CANX,VPS8
Drug	1803_UP	Epirizole [18694-40-1]; Up 200; 17uM; PC3; HT_HG-U133A	7.635e-05	1	0.006436	0.06675	11	196	ATP6V1C1,RIOK3,SOCS6,DDX3X,NXPE3,KLHL9,MBTPS2,NEMP1,HIPK3,NNT,HERC4
Drug	2045_UP	Guanabenz acetate [23256-50-0]; Up 200; 13.8uM; HL60; HG-U133A	7.635e-05	1	0.006436	0.06675	11	196	RIOK3,RXYLT1,WASHC5,SEC23A,TRAPPC11,LAMP2,ECT2,ATP2C1,MTM1,PCMTD2,RP2
Drug	3093_DN	Pipemidic acid [51940-44-4]; Down 200; 13.2uM; HL60; HT_HG-U133A	7.635e-05	1	0.006436	0.06675	11	196	SNX13,MFAP3,PIGA,PLAA,NFYA,MKLN1,FOXN2,PHTF2,FASTKD2,HIPK3,C18orf25
Drug	1054_DN	LY 294002; Down 200; 0.1uM; MCF7; HT_HG-U133A_EA	7.635e-05	1	0.006436	0.06675	11	196	ZNF268,ADAM10,PHKB,EFEMP1,MBTPS2,RBL2,CANX,PHTF2,IKZF5,TARDBP,PCMTD2
Drug	1861_DN	Triamterene [396-01-0]; Down 200; 15.8uM; HL60; HT_HG-U133A	7.635e-05	1	0.006436	0.06675	11	196	ATP6V1C1,MATR3,SOCS6,LDAH,NFYA,NUDT21,ECT2,OPA1,THADA,ATP2C1,RNF6
Drug	1338_DN	Buflomedil hydrochloride [35543-24-9]; Down 200; 11.6uM; HL60; HT_HG-U133A	7.635e-05	1	0.006436	0.06675	11	196	DDX3X,FBXO38,RINT1,SEC23A,ARMC8,CUL4B,PTBP3,CANX,ATF2,PPP2R1B,MTM1
Drug	4781_DN	Benperidol [2062-84-2]; Down 200; 10.4uM; MCF7; HT_HG-U133A	7.635e-05	1	0.006436	0.06675	11	196	PTK2,DDX3X,DHX15,ATG5,UBR2,RBL2,CLIC4,YTHDC2,PCNX4,DPY19L4,PCMTD2
Drug	6273_DN	Tremorine dihydrochloride [300-68-5]; Down 200; 15uM; MCF7; HT_HG-U133A	7.635e-05	1	0.006436	0.06675	11	196	BACH1,RINT1,KLHL9,PLAA,NFYA,HSPA4,PTBP3,PHTF2,ZDHHC17,PAPOLG,PPP2R1B
Drug	2924_DN	Oxamniquine [21738-42-1]; Down 200; 14.4uM; HL60; HT_HG-U133A	7.635e-05	1	0.006436	0.06675	11	196	APH1B,ERCC6,GIN1,ZNF813,PTK2,FBXO38,NFYA,ZNF468,ZNF614,KPNA1,RCHY1
Drug	1433_DN	Ethosuximide [77-67-8]; Down 200; 28.4uM; HL60; HG-U133A	7.635e-05	1	0.006436	0.06675	11	196	ATP6V1C1,SEC24A,MATR3,RIOK3,RANBP6,LAMP2,ATF2,GORASP2,TMEM267,RNF6,NNT
Drug	832_DN	Y-27632; Down 200; 3uM; MCF7; HT_HG-U133A_EA	7.635e-05	1	0.006436	0.06675	11	196	ZNF813,FRS2,WDR48,PTBP3,PHTF2,LAMP2,ATF2,CSE1L,TMEM267,PCNX4,HERC4
Drug	1275_UP	Bezafibrate [41859-67-0]; Up 200; 11uM; HL60; HT_HG-U133A	7.991e-05	1	0.006436	0.06675	11	197	APH1B,PEX13,RXYLT1,DDX3X,NFYA,ATL2,SEL1L,RCHY1,ZDHHC17,ZNF10,CSE1L
Drug	2113_DN	Gemfibrozil [25812-30-0]; Down 200; 16uM; PC3; HT_HG-U133A	7.991e-05	1	0.006436	0.06675	11	197	ATP6V1C1,ZSCAN12,DDX3X,PHKB,MBTPS2,SEL1L,NUP98,PHTF2,PPP2R5C,IRAK4,ZNF84
Drug	5344_DN	Metergoline [17692-51-2]; Down 200; 10uM; MCF7; HT_HG-U133A	7.991e-05	1	0.006436	0.06675	11	197	SOCS6,FEM1C,DDX3X,MBTPS2,NFYA,HSPA4,KPNA1,NUDT21,MSH6,PPP2R1B,HERC4
Drug	1410_DN	Levamisole hydrochloride [16595-80-5]; Down 200; 16.6uM; HL60; HG-U133A	7.991e-05	1	0.006436	0.06675	11	197	MATR3,RIOK3,GFPT1,DHX15,WDR48,DCP2,LAMP2,ATF2,PPP2R1B,ATP2C1,NNT
Drug	1386_DN	Dizocilpine maleate [77086-22-7]; Down 200; 11.8uM; HL60; HG-U133A	7.991e-05	1	0.006436	0.06675	11	197	MATR3,SLC35D1,FBXO38,RINT1,RBL2,CREBL2,MSH6,ATP2C1,ZW10,NNT,DOP1A
Drug	1931_DN	Amoxapine [14028-44-5]; Down 200; 12.8uM; PC3; HG-U133A	7.991e-05	1	0.006436	0.06675	11	197	KLHL7,RBL2,CANX,POLR2B,LAMP2,ECT2,ATP2C1,RBM12,RPRD1A,HS2ST1,STK38L
Drug	2544_DN	Medrysone [2668-66-8]; Down 200; 11.6uM; HL60; HT_HG-U133A	7.991e-05	1	0.006436	0.06675	11	197	RNGTT,RINT1,KLHL9,SEL1L,C12orf4,NUDT21,IKZF5,PPP2R1B,ATP2C1,MTM1,IRAK4
Drug	1314_DN	Carisoprodol [78-44-4]; Down 200; 15.4uM; HL60; HT_HG-U133A	7.991e-05	1	0.006436	0.06675	11	197	SEC24A,ADAM10,DDX3X,TWSG1,SEC23A,SEL1L,CLIC4,ATF2,TRIM23,AKAP10,ZNF654
Drug	2768_DN	Eserine sulfate, physostigmine sulfate [64-47-1]; Down 200; 6.2uM; MCF7; HT_HG-U133A	7.991e-05	1	0.006436	0.06675	11	197	ADAM10,MFAP3,NFYA,PTBP3,FASTKD2,OPA1,IKZF5,HIPK3,CSE1L,RNF6,USO1
Drug	1441_UP	Mafenide hydrochloride [138-37-4]; Up 200; 18uM; HL60; HG-U133A	7.991e-05	1	0.006436	0.06675	11	197	RNGTT,SEC24A,RIOK3,TSN,TTC26,DDX3X,KPNA1,PPP2R1B,ATP2C1,MTM1,NNT
Drug	1397_DN	Tetracycline hydrochloride [64-75-5]; Down 200; 8.4uM; HL60; HG-U133A	7.991e-05	1	0.006436	0.06675	11	197	SEC24A,ABITRAM,HSPA4,WDR48,TRAPPC11,NMD3,THADA,DPY19L4,TMEM184C,NNT,PRRC1
Drug	CID000017406	B1005	8.174e-05	1	0.006436	0.06675	3	7	COPB2,COPB1,ARCN1
Drug	4837_DN	Catechin-(+,-) hydrate [7295-85-4]; Down 200; 13.8uM; MCF7; HT_HG-U133A	8.361e-05	1	0.006436	0.06675	11	198	TSN,SOCS6,SPIN1,ARMC8,CUL2,PTBP3,TRAPPC11,RBL2,SHOC2,CSE1L,SEC23IP
Drug	1619_DN	Methyldopa (L,-) [555-30-6]; Down 200; 19uM; HL60; HG-U133A	8.361e-05	1	0.006436	0.06675	11	198	SEC24A,KPNA1,STAM,ATF2,IKZF5,NMD3,MSH6,ATP2C1,USO1,HS2ST1,TMEM184C
Drug	2336_UP	Nalidixic acid sodium salt hydrate; Up 200; 14.6uM; HL60; HT_HG-U133A	8.361e-05	1	0.006436	0.06675	11	198	MON2,ZNF155,MFAP3,MBTPS2,ATL2,SEL1L,NEMP1,FOXJ3,PAPOLG,C21orf91,ZNF20
Drug	1298_DN	Coralyne chloride hydrate [38989-38-7]; Down 200; 9.6uM; HL60; HT_HG-U133A	8.361e-05	1	0.006436	0.06675	11	198	KLHL24,RIOK3,ADAM10,PTK2,DDX3X,HSPA4,WDR48,PTBP3,CLIC4,YTHDC2,IDE
Drug	1900_DN	Ethambutol dihydrochloride [1070-11-7]; Down 200; 14.4uM; PC3; HG-U133A	8.361e-05	1	0.006436	0.06675	11	198	PIGN,CCP110,MATR3,TSN,CLASP2,CANX,PPP2R1B,USO1,AKAP10,ZW10,STK38L
Drug	1945_UP	Azathioprine [446-86-6]; Up 200; 14.4uM; PC3; HG-U133A	8.361e-05	1	0.006436	0.06675	11	198	KLHL24,RIOK3,EFEMP1,KLHL7,MED23,CUL2,CREBL2,THADA,HS2ST1,RP2,DOP1A
Drug	908_UP	5140203; Up 200; 15uM; MCF7; HT_HG-U133A_EA	8.361e-05	1	0.006436	0.06675	11	198	KLHL24,RNGTT,DDX3X,FBXO38,CUL4B,NUDT21,PHTF2,FOXJ3,IKZF5,RNF6,IRAK4
Drug	7416_DN	Cortisone [53-06-5]; Down 200; 11uM; MCF7; HT_HG-U133A	8.361e-05	1	0.006436	0.06675	11	198	RIOK3,GFPT1,SNX13,PTBP3,ZNF254,YTHDC2,TRIM23,MTM1,SEC23IP,NNT,HERC4
Drug	5681_DN	Dehydrocholic acid [81-23-2]; Down 200; 9.6uM; MCF7; HT_HG-U133A	8.361e-05	1	0.006436	0.06675	11	198	ZSCAN12,RNGTT,NCBP1,DDX3X,NXPE3,WDR48,PHTF2,YTHDC2,ZBTB1,C21orf91,RNF6
Drug	7450_DN	Levamisole hydrochloride [16595-80-5]; Down 200; 16.6uM; MCF7; HT_HG-U133A	8.361e-05	1	0.006436	0.06675	11	198	ATP6V1C1,CLASP2,SNX13,ATL2,WDR48,PTBP3,ATF2,PPP2R1B,SEC23IP,PTCD2,HERC4
Drug	1795_UP	Chloramphenicol [56-75-7]; Up 200; 12.4uM; PC3; HT_HG-U133A	8.361e-05	1	0.006436	0.06675	11	198	MATR3,GDAP1,PTK2,ZNF614,SEL1L,CUL4B,CANX,C18orf25,GORASP2,ZNF84,NNT
Drug	1309_DN	Lactobionic acid [96-82-2]; Down 200; 11.2uM; HL60; HT_HG-U133A	8.361e-05	1	0.006436	0.06675	11	198	RNGTT,NCBP1,GFPT1,DDX3X,NFYA,SLC39A6,SEC23A,PHTF2,TRIM23,RNF6,STK38L
Drug	2010_DN	Erythromycin [114-07-8]; Down 200; 5.4uM; HL60; HG-U133A	8.361e-05	1	0.006436	0.06675	11	198	CCP110,GFPT1,SNX13,DHX15,PLAA,CANX,NUP98,ATF2,MSH6,PPP2R1B,RPRD1A
Drug	1407_DN	Etodolac [41340-25-4]; Down 200; 14uM; HL60; HG-U133A	8.361e-05	1	0.006436	0.06675	11	198	RIOK3,ADAM10,GFPT1,AP1G1,NFYA,WDR48,PTBP3,CLIC4,ATF2,HS2ST1,TMEM184C
Drug	2357_DN	Phenelzine sulfate [156-51-4]; Down 200; 17uM; HL60; HT_HG-U133A	8.746e-05	1	0.006509	0.06751	11	199	PIGN,CLASP2,DDX3X,FBXO38,RINT1,HSPA4,SEL1L,PTBP3,LAMP2,CREBL2,PTCD2
Drug	7072_DN	PHA-00816795 [212631-79-3]; Down 200; 10uM; PC3; HT_HG-U133A	8.746e-05	1	0.006509	0.06751	11	199	KLHL24,ZSCAN12,GDAP1,TTC26,HSPA4,WDR48,SEL1L,PHTF2,CLIC4,C18orf25,ZNF654
Drug	7398_DN	Merbromin [129-16-8]; Down 200; 5uM; PC3; HT_HG-U133A	8.746e-05	1	0.006509	0.06751	11	199	ATP6V1C1,MBTPS2,PTBP3,NEMP1,RCHY1,ZNF254,ZNF10,RNF6,AKAP10,NNT,HERC4
Drug	1559_DN	Spiperone [749-02-0]; Down 200; 10.2uM; HL60; HG-U133A	8.746e-05	1	0.006509	0.06751	11	199	GFPT1,AP1G1,NFYA,HSPA4,ARMC8,RBL2,NUP98,YTHDC2,ECT2,PPP2R1B,PCNX4
Drug	1615_UP	Brinzolamide [138890-62-7]; Up 200; 10.4uM; HL60; HG-U133A	8.746e-05	1	0.006509	0.06751	11	199	DDX3X,HSPA4,NUDT21,NOL11,ECT2,SHQ1,NMD3,THADA,ATP2C1,RP2,PRRC1
Drug	2039_UP	Haloperidol [52-86-8]; Up 200; 10.6uM; HL60; HG-U133A	8.746e-05	1	0.006509	0.06751	11	199	RIOK3,TSN,DDX3X,KLHL7,TRAPPC11,RBL2,ECT2,IKZF5,ATP2C1,PCMTD2,RP2
Drug	1241_DN	estradiol, USP; Down 200; 0.01uM; PC3; HT_HG-U133A	8.746e-05	1	0.006509	0.06751	11	199	NXPE3,ZNF468,ZNF254,TRIM23,IKZF5,C18orf25,MSH6,THADA,MTM1,ZNF84,NNT
Drug	7541_UP	16-phenyl tetranor Prostaglandin E2; Up 200; 10uM; MCF7; HT_HG-U133A	8.746e-05	1	0.006509	0.06751	11	199	FRS2,MDM2,PTBP3,RBL2,YTHDC2,ZDHHC17,TRIM23,PPP2R1B,RNF6,MTM1,NNT
Drug	5324_UP	Digoxin [20830-75-5]; Up 200; 5.2uM; MCF7; HT_HG-U133A	8.984e-05	1	0.006658	0.06906	10	166	KLHL24,RIOK3,DDX3X,NFYA,ZDHHC17,ATF2,IKZF5,ZNF10,ZBTB11,ZNF654
Drug	6503_DN	Remoxipride Hydrochloride [73220-03-8]; Down 200; 9.8uM; MCF7; HT_HG-U133A	9.146e-05	1	0.00675	0.07001	11	200	RNGTT,CLASP2,DDX3X,RINT1,PLAA,MBTPS2,DCAF17,NUP98,FOXJ3,TRIM23,PPP2R1B
Drug	CID006331826	C.I. 337	9.546e-05	1	0.007017	0.07277	6	55	GFPT1,PTK2,PIK3R4,RBL2,PPAT,SEC23IP
Drug	ctd:D005947	Glucose	9.709e-05	1	0.007107	0.07371	37	1420	KLHL24,HIF1A,MIER3,CLASP2,GFPT1,PTK2,DHX15,PHKB,MFAP3,PIGA,MBTPS2,KLHL8,ATL2,FOXN2,WDR36,CANX,VPS4B,BTBD10,ELP1,LAMP2,IDE,SLC39A10,FCHO2,ATE1,NCOA4,CGGBP1,OPA1,THADA,CSE1L,MTM1,TBC1D23,MTREX,NNT,NBR1,HSPA14,YTHDF3,DOP1A
Drug	2193_UP	Lanatoside C [17575-22-3]; Up 200; 4uM; HL60; HT_HG-U133A	0.0001042	1	0.0076	0.07883	10	169	KLHL24,SEC24A,DDX3X,AP1G1,NFYA,FASTKD2,STAM,C18orf25,AKAP10,ZBTB11
Drug	4344_DN	Trichostatin A, from Streptomyces sp.; Down 200; 0.1uM; PC3; HT_HG-U133A	0.0001206	1	0.008754	0.0908	10	172	ZSCAN12,GIN1,SOCS6,DDX3X,MBTPS2,HSPA4,SEC23A,RCHY1,ZBTB1,IKZF5
Drug	CID000081462	BT-B	0.0001235	1	0.00893	0.09262	12	243	KLHL24,TP53INP1,BACH1,KLHL7,CUL4B,CUL2,ZBTB33,BTBD10,ECT2,SETDB2,GZF1,KLHL15
Drug	1063_UP	17-AAG; Up 200; 1uM; MCF7; HT_HG-U133A_EA	0.0001326	1	0.009551	0.09906	10	174	SEC24A,GFPT1,GTF3C3,HSPA4,ARMC8,SEL1L,UBR2,ATF2,PCNX4,PRRC1
Drug	1345_DN	Betulinic acid [472-15-1]; Down 200; 8.8uM; HL60; HT_HG-U133A	0.0001456	1	0.01041	0.1079	10	176	NCBP1,ADAM10,DDX3X,SEL1L,CLIC4,ZBTB1,C21orf91,PPP2R1B,ZNF654,RAB33B
Drug	1393_UP	Nocodazole [31430-18-9]; Up 200; 13.2uM; HL60; HG-U133A	0.0001456	1	0.01041	0.1079	10	176	HIF1A,RIOK3,PTK2,SERINC1,PTBP3,ECT2,ATF2,PCNX4,DPY19L4,RP2
Drug	4827_DN	Emetine dihydrochloride [316-42-7]; Down 200; 7.2uM; MCF7; HT_HG-U133A	0.0001525	1	0.01086	0.1126	10	177	PTK2,DDX3X,SLC38A2,SLC39A6,SEL1L,LAMP2,OPA1,PCMTD2,RP2,NNT
Drug	1819_UP	Triamterene [396-01-0]; Up 200; 15.8uM; PC3; HT_HG-U133A	0.0001672	1	0.01181	0.1224	10	179	BACH1,ADAM10,DDX3X,MBTPS2,ZNF468,SEL1L,PTBP3,CLIC4,NNT,HERC4
Drug	4651_DN	Cephaeline dihydrochloride heptahydrate [6487-30-5]; Down 200; 6uM; PC3; HT_HG-U133A	0.0001672	1	0.01181	0.1224	10	179	RNGTT,DDX3X,SEL1L,CANX,PHTF2,LAMP2,STAM,OPA1,CSE1L,NNT
Drug	ctd:C437683	motexafin gadolinium	0.0001692	1	0.0119	0.1234	9	146	HIF1A,BACH1,MDM2,SLC38A2,HSPA4,CANX,PHTF2,ELP1,SLC39A10
Drug	5573_UP	17-DMAG; Up 200; 0.1uM; MCF7; HT_HG-U133A	0.000183	1	0.01268	0.1316	10	181	MDM2,GTF3C3,HSPA4,ZNF614,ARMC8,SEL1L,FASTKD2,ATF2,ZNF10,C18orf25
Drug	3275_DN	Digitoxigenin [143-62-4]; Down 200; 10.6uM; MCF7; HT_HG-U133A	0.000183	1	0.01268	0.1316	10	181	ZC3H14,SOCS6,FBXO38,ARMC8,HSPBAP1,ELP1,PALB2,GTF2E1,RBM12,IRAK4
Drug	1791_DN	Azaguanine-8 [134-58-7]; Down 200; 26.2uM; PC3; HT_HG-U133A	0.000183	1	0.01268	0.1316	10	181	SEC24A,PIK3R4,FBXO34,ARMC8,S100PBP,UBR2,NUP98,METTL4,PPP2R1B,TBK1
Drug	CID006439497	rhizopodin	0.0001839	1	0.01268	0.1316	2	2	PTK2,DLD
Drug	CID000454118	AC1L9REW	0.0001839	1	0.01268	0.1316	2	2	THADA,NNT
Drug	1008_UP	geldanamycin; Up 200; 1uM; MCF7; HT_HG-U133A_EA	0.0001914	1	0.01315	0.1364	10	182	RNGTT,FRS2,MDM2,GFPT1,HSPA4,SEL1L,C18orf25,PDE12,RNF6,PRRC1
Drug	CID000024660	hartshorn	0.0001923	1	0.01316	0.1365	3	9	PIGA,INTS6,RP2
Drug	ctd:C013418	bromfenacoum	0.000198	1	0.01351	0.1401	21	645	EPS15,ATP6V1C1,MATR3,DDX5,MTX3,C12orf4,NUDT21,CPSF6,CANX,NUP98,STAM,OPA1,LRPPRC,ATP2C1,RBM12,SF3B1,NAPB,ELP2,ZNF512,GFM1,NNT
Drug	1334_UP	Myricetin [529-44-2]; Up 200; 12.6uM; HL60; HT_HG-U133A	0.0002282	1	0.0155	0.1608	10	186	KLHL24,RNGTT,BACH1,DDX3X,ZNF614,ZNF254,ZDHHC17,IKZF5,HIPK3,ZNF10
Drug	4989_DN	Thioguanosine [85-31-4]; Down 200; 12.6uM; MCF7; HT_HG-U133A	0.0002382	1	0.01606	0.1666	10	187	RNGTT,SEC24A,CLASP2,PTK2,DDX3X,MFAP3,ARMC8,NUP98,MSH6,PPP2R1B
Drug	3278_DN	Naringenine [480-41-1]; Down 200; 14.6uM; MCF7; HT_HG-U133A	0.0002382	1	0.01606	0.1666	10	187	KLHL24,RNGTT,GDAP1,NCBP1,MDM2,SLC35D1,NFYA,PTBP3,ZDHHC17,IRAK4
Drug	1299_UP	Estradiol-17 beta [50-28-2]; Up 200; 14.6uM; HL60; HT_HG-U133A	0.0002487	1	0.01646	0.1707	10	188	RNGTT,ADAM10,GFPT1,DDX3X,NFYA,HSPA4,CUL4B,FOXJ3,RNF6,USO1
Drug	6926_UP	17-AAG; Up 200; 1uM; MCF7; HT_HG-U133A	0.0002487	1	0.01646	0.1707	10	188	ZNF813,GFPT1,PLAA,NFYA,TMEM41B,ATL2,SEL1L,CUL4B,CUL2,PTBP3
Drug	4545_DN	Ethotoin [86-35-1]; Down 200; 19.6uM; PC3; HT_HG-U133A	0.0002487	1	0.01646	0.1707	10	188	KLHL24,RNGTT,RIOK3,MBTPS2,HSPA4,SGCB,RBL2,TRIM23,SF3B1,ZNF654
Drug	2161_DN	Picrotoxinin [17617-45-7]; Down 200; 13.6uM; HL60; HT_HG-U133A	0.0002487	1	0.01646	0.1707	10	188	RNGTT,TSN,ADAM10,DDX3X,FBXO38,HSPA4,SEC23A,NMD3,MSH6,RNF6
Drug	2805_DN	Harmaline hydrochloride dihydrate [6027-98-1]; Down 200; 14uM; MCF7; HT_HG-U133A	0.0002487	1	0.01646	0.1707	10	188	ATP6V1C1,DDX3X,MFAP3,HSPA4,PTBP3,NEMP1,PHTF2,ZDHHC17,RNF6,HERC4
Drug	911_UP	wortmannin; Up 200; 0.01uM; MCF7; HT_HG-U133A_EA	0.0002595	1	0.01705	0.1768	10	189	KLHL24,ERCC6,FRS2,MDM2,SERINC1,CUL4B,FOXJ3,TRIM23,HIPK3,PCMTD2
Drug	2797_DN	Seneciphylline [480-81-9]; Down 200; 12uM; MCF7; HT_HG-U133A	0.0002595	1	0.01705	0.1768	10	189	ZSCAN12,RIOK3,MDM2,DDX3X,CUL2,PTBP3,PHTF2,ZDHHC17,RNF6,HERC4
Drug	ctd:D006997	Hypochlorous Acid	0.0002697	1	0.01707	0.177	15	387	RIOK3,PSMD5,DDX3X,RAB10,SERINC1,SLC39A6,KPNA1,PTBP3,CANX,NOL11,ARCN1,HIPK3,USO1,TBC1D23,MAPK6
Drug	1343_DN	Primaquine diphosphate [63-45-6]; Down 200; 8.8uM; HL60; HT_HG-U133A	0.0002707	1	0.01707	0.177	10	190	NCBP1,RXYLT1,ADAM10,FBXO38,PHKB,CUL4B,NEMP1,PHTF2,PPP2R1B,RNF6
Drug	2866_DN	Budesonide [51333-22-3]; Down 200; 9.2uM; MCF7; HT_HG-U133A	0.0002707	1	0.01707	0.177	10	190	SNX13,FBXO38,MBTPS2,SPIN1,HSPA4,ZNF614,HIPK3,SF3B1,RNF6,USO1
Drug	1041_DN	haloperidol; Down 200; 10uM; MCF7; HT_HG-U133A_EA	0.0002823	1	0.01707	0.177	10	191	RINT1,NFYA,TWSG1,SEL1L,PTBP3,C12orf4,RBL2,CANX,ZNF83,NNT
Drug	2227_DN	Terfenadine [50679-08-8]; Down 200; 8.4uM; MCF7; HT_HG-U133A	0.0002823	1	0.01707	0.177	10	191	RNGTT,GDAP1,MDM2,FBXO38,NFYA,HSPA4,PHTF2,TRIM23,MTM1,SEC23IP
Drug	3188_DN	Alprenolol hydrochloride [13707-88-5]; Down 200; 14uM; MCF7; HT_HG-U133A	0.0002944	1	0.01707	0.177	10	192	GDAP1,FRS2,MDM2,DDX3X,ATL2,HSPA4,SEL1L,FOXN2,IRAK4,AKAP10
Drug	6713_DN	Monobenzone [103-16-2]; Down 200; 20uM; PC3; HT_HG-U133A	0.0002944	1	0.01707	0.177	10	192	ATP6V1C1,TSN,DDX3X,SNX13,PLAA,SEC23A,WDR48,PTBP3,NUP98,RNF6
Drug	2026_DN	Midecamycin [35457-80-8]; Down 200; 5uM; HL60; HG-U133A	0.0002944	1	0.01707	0.177	10	192	CCP110,CLASP2,GTF3C3,DHX15,SLC38A2,NUDT21,NUP98,RANBP6,SF3B1,TBK1
Drug	5058_DN	Homatropine hydrobromide (R,S) [51-56-9]; Down 200; 11.2uM; PC3; HT_HG-U133A	0.0002944	1	0.01707	0.177	10	192	RIOK3,SNX13,FBXO38,SPIN1,ZNF254,CLIC4,TRIM23,SF3B1,RNF6,USO1
Drug	2722_DN	Cinoxacin [28657-80-9]; Down 200; 15.2uM; HL60; HT_HG-U133A	0.0002944	1	0.01707	0.177	10	192	FEM1C,ADAM10,TWSG1,SEC23A,SEL1L,CUL4B,FOXJ3,ATF2,TRIM23,RNF6
Drug	6659_DN	Clorgyline hydrochloride [17780-75-5]; Down 200; 13uM; PC3; HT_HG-U133A	0.0002944	1	0.01707	0.177	10	192	ATP6V1C1,GDAP1,SOCS6,MDM2,SNX13,NUDT21,PHTF2,IKZF5,TTC30A,ZW10
Drug	1768_DN	Atropine sulfate monohydrate [5908-99-6]; Down 200; 5.8uM; HL60; HG-U133A	0.0003068	1	0.01707	0.177	10	193	RIOK3,RINT1,SEC23A,KPNA1,ATF2,OPA1,WDR47,TMEM267,RP2,NNT
Drug	1417_DN	Tranylcypromine hydrochloride [1986-47-6]; Down 200; 23.6uM; HL60; HG-U133A	0.0003068	1	0.01707	0.177	10	193	BACH1,NCBP1,DHX15,SPIN1,ATF2,CREBL2,NMD3,USO1,MTM1,RP2
Drug	865_DN	C768-0445; Down 200; 10uM; MCF7; HT_HG-U133A_EA	0.0003068	1	0.01707	0.177	10	193	ZNF268,FRS2,RXYLT1,KLHL9,POLR1B,HSPA4,ARMC8,ZNF254,NUP98,HERC4
Drug	6753_DN	Caffeic acid [3331-39-5]; Down 200; 22.2uM; PC3; HT_HG-U133A	0.0003068	1	0.01707	0.177	10	193	FRS2,DDX3X,MBTPS2,SEC23A,PTBP3,CANX,PHTF2,CLIC4,PDE12,RNF6
Drug	4846_DN	Quercetine dihydrate [6151-25-3]; Down 200; 11.8uM; MCF7; HT_HG-U133A	0.0003068	1	0.01707	0.177	10	193	RNGTT,PTK2,DDX3X,PHKB,KLHL9,PTBP3,C12orf4,PHTF2,NNT,ZNF654
Drug	7052_DN	0316684-0000 [391209-55-5]; Down 200; 10uM; MCF7; HT_HG-U133A	0.0003068	1	0.01707	0.177	10	193	RNGTT,GDAP1,ADAM10,TTC26,DDX3X,MBTPS2,NUDT21,PHTF2,TRIM23,HERC4
Drug	1752_DN	Dipivefrin hydrochloride [64019-93-8]; Down 200; 10.4uM; HL60; HG-U133A	0.0003068	1	0.01707	0.177	10	193	TSN,ADAM10,GFPT1,DDX3X,NFYA,HSPA4,SEL1L,NUDT21,CLIC4,RP2
Drug	1774_DN	Pseudopelletierine hydrochloride [6164-62-1]; Down 200; 21uM; HL60; HG-U133A	0.0003068	1	0.01707	0.177	10	193	HSPA4,KPNA1,WDR48,IDE,ATF2,NMD3,PPP2R1B,TMEM267,PCNX4,PRRC1
Drug	2040_UP	Perphenazine [58-39-9]; Up 200; 10uM; HL60; HG-U133A	0.0003068	1	0.01707	0.177	10	193	DDX3X,KLHL7,WDR48,ATG5,TRAPPC11,RBL2,ATF2,TMEM267,PCNX4,RP2
Drug	6946_DN	geldanamycin; Down 200; 1uM; MCF7; HT_HG-U133A	0.0003068	1	0.01707	0.177	10	193	BACH1,TWSG1,ARMC8,WDR48,HSPBAP1,PALB2,MSH6,RBM12,TMEM168,ZW10
Drug	1079_UP	estradiol, USP; Up 200; 0.01uM; MCF7; HT_HG-U133A_EA	0.0003068	1	0.01707	0.177	10	193	FRS2,RXYLT1,FEM1C,MDM2,SNX13,ARMC8,WDR48,PTBP3,NEMP1,ZDHHC17
Drug	7375_DN	Pentolinium bitartrate [52-62-0]; Down 200; 7.4uM; PC3; HT_HG-U133A	0.0003068	1	0.01707	0.177	10	193	SEC24A,GDAP1,TSN,ADAM10,PHTF2,TRIM23,IKZF5,RNF6,HS2ST1,NNT
Drug	7014_DN	Talampicillin hydrochloride [39878-70-1]; Down 200; 7.8uM; MCF7; HT_HG-U133A	0.0003068	1	0.01707	0.177	10	193	RNGTT,NFYA,RBL2,ZNF254,PHTF2,BBS10,C21orf91,C1orf115,ZNF83,NNT
Drug	2166_DN	Succinylsulfathiazole [116-43-8]; Down 200; 11.2uM; HL60; HT_HG-U133A	0.0003068	1	0.01707	0.177	10	193	ATP6V1C1,DDX3X,SEL1L,PTBP3,NEMP1,CLIC4,FOXJ3,PPP2R1B,RNF6,HERC4
Drug	3098_DN	Prazosin hydrochloride [19237-84-4]; Down 200; 9.6uM; HL60; HT_HG-U133A	0.0003068	1	0.01707	0.177	10	193	BACH1,SOCS6,DDX3X,PLAA,NFYA,DCAF17,PTBP3,CLIC4,FOXJ3,HIPK3
Drug	1336_UP	SR-95639A [115767-94-7]; Up 200; 10uM; HL60; HT_HG-U133A	0.0003197	1	0.01707	0.177	10	194	ATP6V1C1,RNGTT,SEC24A,MBTPS2,NFYA,CUL4B,ZNF254,STAM,ZDHHC17,RNF6
Drug	1405_DN	Piroxicam [36322-90-4]; Down 200; 12uM; HL60; HG-U133A	0.0003197	1	0.01707	0.177	10	194	MATR3,ADAM10,DDX3X,NFYA,PTBP3,CANX,CREBL2,HS2ST1,SEC23IP,NNT
Drug	1924_DN	Naloxone hydrochloride [357-08-4]; Down 200; 11uM; PC3; HG-U133A	0.0003197	1	0.01707	0.177	10	194	MATR3,CLASP2,PTK2,PIGA,ECT2,PPP2R1B,RPRD1A,PCNX4,SAR1B,ZBTB11
Drug	1724_DN	Imipenem [74431-23-5]; Down 200; 13.4uM; HL60; HG-U133A	0.0003197	1	0.01707	0.177	10	194	RNGTT,RIOK3,SLC35D1,AP1G1,NFYA,NUDT21,ECT2,ATF2,THADA,ATP2C1
Drug	7522_UP	CP-645525-01 [287190-82-3]; Up 200; 10uM; MCF7; HT_HG-U133A	0.0003197	1	0.01707	0.177	10	194	MON2,KLHL24,ATP6V1C1,GDAP1,NFYA,HSPA4,NEMP1,PHTF2,RNF6,HERC4
Drug	3184_DN	Pyrilamine maleate [59-33-6]; Down 200; 10uM; MCF7; HT_HG-U133A	0.0003197	1	0.01707	0.177	10	194	ZSCAN12,FRS2,NCBP1,SOCS6,MFAP3,NFYA,WDR48,FOXN2,MTM1,AKAP10
Drug	4990_DN	Methapyrilene hydrochloride [135-23-9]; Down 200; 13.4uM; MCF7; HT_HG-U133A	0.0003197	1	0.01707	0.177	10	194	RNGTT,FRS2,MDM2,DDX3X,MFAP3,MBTPS2,PTBP3,YTHDC2,FOXJ3,IKZF5
Drug	4176_DN	Carteolol hydrochloride [51781-21-6]; Down 200; 12.2uM; MCF7; HT_HG-U133A	0.0003197	1	0.01707	0.177	10	194	RNGTT,DDX3X,SNX13,SLC35D1,MBTPS2,HSPA4,YTHDC2,TRIM23,HIPK3,RNF6
Drug	1409_DN	Etofylline [519-37-9]; Down 200; 17.8uM; HL60; HG-U133A	0.0003197	1	0.01707	0.177	10	194	EPS15,RNGTT,SEC24A,WDR48,LAMP2,CREBL2,C18orf25,ATP2C1,MTM1,NNT
Drug	1413_UP	Pyrantel tartrate [33401-94-4]; Up 200; 11.2uM; HL60; HG-U133A	0.0003197	1	0.01707	0.177	10	194	CCP110,ATP6V1C1,RNGTT,ADAM10,TTC26,DDX3X,NUDT21,YTHDC2,NMD3,ATP2C1
Drug	3280_DN	Adamantamine fumarate [80789-67-9]; Down 200; 9.6uM; MCF7; HT_HG-U133A	0.0003197	1	0.01707	0.177	10	194	KLHL24,NCBP1,CLASP2,PLAA,SEL1L,TRAPPC11,C12orf4,FOXJ3,RBM12,RNF6
Drug	1730_DN	Ethamivan [304-84-7]; Down 200; 18uM; HL60; HG-U133A	0.0003197	1	0.01707	0.177	10	194	RIOK3,PTK2,DDX3X,CANX,LAMP2,CREBL2,PPP2R5C,ATP2C1,RP2,NNT
Drug	2068_UP	Mianserine hydrochloride [21535-47-7]; Up 200; 13.2uM; PC3; HT_HG-U133A	0.0003197	1	0.01707	0.177	10	194	ATP6V1C1,ZSCAN12,DDX3X,MBTPS2,SEL1L,CLIC4,TRIM23,HIPK3,RNF6,ZNF84
Drug	2650_DN	Androsterone [53-41-8]; Down 200; 13.8uM; MCF7; HT_HG-U133A	0.0003197	1	0.01707	0.177	10	194	RNGTT,GDAP1,DDX3X,MBTPS2,NFYA,HSPA4,SEC23A,SEL1L,PTBP3,ATF2
Drug	2504_DN	Skimmianine [83-95-4]; Down 200; 15.4uM; HL60; HT_HG-U133A	0.0003197	1	0.01707	0.177	10	194	TTC26,DDX3X,NFYA,ARMC8,C21orf91,HS2ST1,IRAK4,NNT,HERC4,HCCS
Drug	7255_UP	Moxisylyte hydrochoride [964-52-3]; Up 200; 12.6uM; PC3; HT_HG-U133A	0.000333	1	0.01707	0.177	10	195	SNX13,EFEMP1,NFYA,SEL1L,CPSF6,ZBTB1,TRIM23,RBM12,CSE1L,RNF6
Drug	5287_UP	Nafronyl oxalate [3200-06-4]; Up 200; 8.4uM; MCF7; HT_HG-U133A	0.000333	1	0.01707	0.177	10	195	SOCS6,NXPE3,KLHL9,NFYA,MKLN1,SEC23A,WDR48,TRIM23,RNF6,ZW10
Drug	6803_DN	Propoxycaine hydrochloride [550-83-4]; Down 200; 12uM; MCF7; HT_HG-U133A	0.000333	1	0.01707	0.177	10	195	MON2,KLHL24,ATP6V1C1,SLC35D1,CUL2,PTBP3,PAPOLG,CSE1L,PCNX4,HERC4
Drug	2470_DN	Methionine sulfoximine (L) [15985-39-4]; Down 200; 22.2uM; HL60; HT_HG-U133A	0.000333	1	0.01707	0.177	10	195	NXPE3,MFAP3,ZNF614,SEC23A,SEL1L,SGCB,HIPK3,C18orf25,SEC23IP,PRRC1
Drug	421_UP	trifluoperazine dihydrochloride; Up 200; 10uM; MCF7; HG-U133A	0.000333	1	0.01707	0.177	10	195	KLHL24,PEX13,ADAM10,HSPA4,SEC23A,WDR48,NEMP1,RBL2,ZNF20,NNT
Drug	2106_DN	Fenspiride hydrochloride [5053-08-7]; Down 200; 13.4uM; PC3; HT_HG-U133A	0.000333	1	0.01707	0.177	10	195	KLHL24,RNGTT,MATR3,ADAM10,DDX3X,SLC35D1,NFYA,HSPA4,CANX,PHTF2
Drug	3001_DN	Beclomethasone dipropionate [5534-09-8]; Down 200; 7.6uM; HL60; HT_HG-U133A	0.000333	1	0.01707	0.177	10	195	ATP6V1C1,BACH1,ZNF813,PTK2,DDX3X,SEL1L,PTBP3,TRIM23,HIPK3,PDE12
Drug	3237_DN	Adenosine 5'-monophosphate monohydrate [18422-05-4]; Down 200; 11uM; MCF7; HT_HG-U133A	0.000333	1	0.01707	0.177	10	195	FRS2,MDM2,SNX13,PLAA,NFYA,PTBP3,FOXN2,TRIM23,PDE12,RNF6
Drug	3864_DN	Ethisterone [434-03-7]; Down 200; 12.8uM; MCF7; HT_HG-U133A	0.000333	1	0.01707	0.177	10	195	FRS2,NCBP1,SOCS6,SNX13,NFYA,PHTF2,RNF6,USO1,TMEM184C,ZW10
Drug	ctd:D003375	Coumestrol	0.0003374	1	0.01707	0.177	42	1796	KLHL24,TP53INP1,NANP,NCBP1,TSN,RXYLT1,SNX13,NXPE3,FBXO38,SENP1,EFEMP1,COG6,SERINC1,POLR1B,ARRDC3,ZNF160,NEMP1,NUDT21,RBL2,PHTF2,ZDHHC17,PPAT,ECT2,ATF2,ZBTB1,UBR7,ZNF260,MSH6,C1orf115,ATP2C1,NDC1,CSE1L,TMEM168,TMED8,ZNF84,STK38L,NNT,FIGNL1,ZNF654,FAM126B,IPO11,RAB33B
Drug	5881_DN	Trimeprazine tartrate [4330-99-8]; Down 200; 5.4uM; PC3; HT_HG-U133A	0.0003468	1	0.01707	0.177	10	196	SOCS6,NFYA,HSPA4,TRAPPC11,SGCB,ZNF254,TRIM23,MSH6,SEC23IP,NNT
Drug	6798_DN	(+,-)-Synephrine [94-07-5]; Down 200; 24uM; MCF7; HT_HG-U133A	0.0003468	1	0.01707	0.177	10	196	MON2,KLHL24,RNGTT,MDM2,HSPA4,WDR48,TRAPPC11,PHTF2,RNF6,HERC4
Drug	4591_UP	Diphemanil methylsulfate [62-97-5]; Up 200; 10.2uM; PC3; HT_HG-U133A	0.0003468	1	0.01707	0.177	10	196	RNGTT,ZNF268,NCBP1,SOCS6,MDM2,SNX13,NXPE3,PHTF2,YTHDC2,TRIM23
Drug	2047_UP	Naltrexone hydrochloride dihydrate [16676-29-2]; Up 200; 9.6uM; PC3; HT_HG-U133A	0.0003468	1	0.01707	0.177	10	196	SEC24A,BACH1,MDM2,MBTPS2,FOXJ3,TRIM23,HIPK3,ZNF10,RBM12,IRAK4
Drug	1164_DN	nordihydroguaiaretic acid; Down 200; 1uM; HL60; HT_HG-U133A	0.0003468	1	0.01707	0.177	10	196	BACH1,RXYLT1,LDAH,ARMC8,WDR48,CUL2,SGCB,BBS10,THADA,DOP1A
Drug	4813_DN	Cyclopenthiazide [742-20-1]; Down 200; 10.6uM; MCF7; HT_HG-U133A	0.0003468	1	0.01707	0.177	10	196	ATP6V1C1,RNGTT,DDX3X,TWSG1,HSPA4,ARMC8,MSH6,CSE1L,USO1,HERC4
Drug	4993_DN	Estrone [53-16-7]; Down 200; 14.8uM; MCF7; HT_HG-U133A	0.0003468	1	0.01707	0.177	10	196	RNGTT,ADAM10,PTK2,DDX3X,SNX13,SLC35D1,NFYA,CUL4B,PHTF2,ZDHHC17
Drug	6245_DN	Papaverine hydrochloride [61-25-6]; Down 200; 10.6uM; MCF7; HT_HG-U133A	0.0003468	1	0.01707	0.177	10	196	RNGTT,GDAP1,ADAM10,TTC26,PLAA,POLR1B,KPNA1,WDR48,RNF6,AKAP10
Drug	6130_DN	(R)-Propranolol hydrochloride [13071-11-9]; Down 200; 13.6uM; HL60; HT_HG-U133A	0.0003468	1	0.01707	0.177	10	196	RNGTT,MDM2,TTC26,RINT1,MBTPS2,NFYA,SEC23A,SEL1L,CREBL2,AKAP10
Drug	5294_DN	Felodipine [72509-76-3]; Down 200; 10.4uM; MCF7; HT_HG-U133A	0.0003468	1	0.01707	0.177	10	196	RNGTT,ZNF813,MDM2,RINT1,SEC23A,CUL2,OPA1,BBS10,C1orf115,ATP2C1
Drug	3448_DN	Dienestrol [84-17-3]; Down 200; 15uM; MCF7; HT_HG-U133A	0.0003468	1	0.01707	0.177	10	196	TSN,ADAM10,DDX3X,SEC23A,PTBP3,CANX,PHTF2,MTM1,AKAP10,NNT
Drug	1978_UP	Prednisone [53-03-2]; Up 200; 11.2uM; HL60; HG-U133A	0.0003468	1	0.01707	0.177	10	196	KLHL24,ZNF268,SEC24A,RIOK3,KLHL7,HSPA4,LAMP2,ECT2,NMD3,ATP2C1
Drug	921_DN	rapamycin; Down 200; 0.1uM; MCF7; HT_HG-U133A_EA	0.0003468	1	0.01707	0.177	10	196	ATP6V1C1,ZNF268,MBTPS2,ARMC8,SEL1L,CUL4B,CUL2,PPP2R1B,ATP2C1,RAB33B
Drug	2951_DN	Piribedil hydrochloride [78213-63-5]; Down 200; 12uM; HL60; HT_HG-U133A	0.0003468	1	0.01707	0.177	10	196	BACH1,FBXO38,ABITRAM,MBTPS2,NFYA,ZNF468,HSPA4,PHTF2,RNF6,TMEM184C
Drug	7310_UP	Chenodiol [474-25-9]; Up 200; 10.2uM; PC3; HT_HG-U133A	0.0003468	1	0.01707	0.177	10	196	APH1B,RNGTT,GDAP1,DDX3X,NFYA,PTBP3,ZBTB1,IKZF5,HIPK3,HERC4
Drug	1315_DN	Cyanocobalamin [68-19-9]; Down 200; 3uM; HL60; HT_HG-U133A	0.0003468	1	0.01707	0.177	10	196	NCBP1,SOCS6,ADAM10,PTK2,FBXO38,SLC39A6,SEC23A,WDR48,ATF2,AKAP10
Drug	7234_DN	Fluphenazine dihydrochloride [146-56-5]; Down 200; 7.8uM; MCF7; HT_HG-U133A	0.0003468	1	0.01707	0.177	10	196	EFEMP1,ZNF468,ELP1,ZDHHC17,TRIM23,C18orf25,ZNF20,CSE1L,RNF6,DOP1A
Drug	2506_DN	Estropipate [7280-37-7]; Down 200; 9.2uM; HL60; HT_HG-U133A	0.0003468	1	0.01707	0.177	10	196	PEX13,DDX3X,RINT1,NFYA,HSPA4,KPNA1,NUDT21,CLIC4,BBS10,NNT
Drug	1820_UP	Isoxicam [34552-84-6]; Up 200; 12uM; PC3; HT_HG-U133A	0.0003468	1	0.01707	0.177	10	196	KLHL24,ZSCAN12,CLASP2,MDM2,KLHL9,NEMP1,NUP98,ZNF10,ATP2C1,NNT
Drug	3048_DN	Propofol [2078-54-8]; Down 200; 22.4uM; HL60; HT_HG-U133A	0.0003468	1	0.01707	0.177	10	196	MON2,RNGTT,MDM2,MFAP3,SEL1L,PTBP3,SGCB,ELP1,TRIM23,HERC4
Drug	2827_DN	Azathymine, 6 [932-53-6]; Down 200; 31.4uM; MCF7; HT_HG-U133A	0.0003468	1	0.01707	0.177	10	196	SNX13,CUL2,NEMP1,PHTF2,TRIM23,ATP2C1,TMEM267,IRAK4,TTC30A,HERC4
Drug	1010_DN	thioridazine hydrochloride; Down 200; 10uM; MCF7; HT_HG-U133A_EA	0.0003468	1	0.01707	0.177	10	196	GDAP1,ZNF813,CLASP2,NFYA,CUL2,PHTF2,RANBP6,YTHDC2,PPP2R1B,TTC30A
Drug	4760_DN	Benzamil hydrochloride [2898-76-2]; Down 200; 11.2uM; MCF7; HT_HG-U133A	0.0003468	1	0.01707	0.177	10	196	MFAP3,PLAA,NFYA,PTBP3,PHTF2,ELP1,ZNF10,PPP2R1B,PDE12,DOP1A
Drug	3556_DN	Verteporfin [129497-78-5]; Down 200; 2.8uM; MCF7; HT_HG-U133A	0.0003507	1	0.01707	0.177	9	161	ADAM10,SLC35D1,EFEMP1,MBTPS2,SLC39A6,SEL1L,CANX,LAMP2,ATP2C1
Drug	2559_DN	Ethoxyquin [91-53-2]; Down 200; 18.4uM; HL60; HT_HG-U133A	0.0003611	1	0.01707	0.177	10	197	MON2,PTK2,TTC26,DDX3X,KLHL9,MBTPS2,TRIM23,IKZF5,PCMTD2,HERC4
Drug	4949_UP	Naphazoline hydrochloride [550-99-2]; Up 200; 16.2uM; MCF7; HT_HG-U133A	0.0003611	1	0.01707	0.177	10	197	RNGTT,MDM2,SLC35D1,SEL1L,YTHDC2,ZBTB1,ZNF10,RNF6,ZW10,HERC4
Drug	2970_DN	Loracarbef [121961-22-6]; Down 200; 10.8uM; HL60; HT_HG-U133A	0.0003611	1	0.01707	0.177	10	197	APH1B,RNGTT,BACH1,GDAP1,SOCS6,SNX13,MBTPS2,TWSG1,TRIM23,RNF6
Drug	2765_DN	Hydrocotarnine hydrobromide [5985-00-2]; Down 200; 13.2uM; MCF7; HT_HG-U133A	0.0003611	1	0.01707	0.177	10	197	NCBP1,SEL1L,SGCB,PHTF2,FASTKD2,TRIM23,ZNF10,IRAK4,TMEM184C,NNT
Drug	6155_DN	Benzylpenicillin sodium [69-57-8]; Down 200; 11.2uM; HL60; HT_HG-U133A	0.0003611	1	0.01707	0.177	10	197	HIF1A,ZNF267,PHKB,ZNF468,WDR48,PHTF2,YTHDC2,PAPOLG,PPP2R1B,CSE1L
Drug	7227_DN	Nadide [53-84-9]; Down 200; 6uM; MCF7; HT_HG-U133A	0.0003611	1	0.01707	0.177	10	197	FRS2,FEM1C,TTC26,MFAP3,EFEMP1,WDR48,ELP1,IKZF5,PDE12,CSE1L
Drug	7300_DN	Nortriptyline hydrochloride [894-71-3]; Down 200; 13.4uM; PC3; HT_HG-U133A	0.0003611	1	0.01707	0.177	10	197	GDAP1,ADAM10,MBTPS2,MKLN1,CUL2,NUP98,TRIM23,C18orf25,ZNF84,NNT
Drug	5326_DN	Ioversol [87771-40-2]; Down 200; 5uM; MCF7; HT_HG-U133A	0.0003611	1	0.01707	0.177	10	197	PTK2,DDX3X,WDR48,NEMP1,ZBTB1,TRIM23,PPP2R1B,RBM12,RNF6,RP2
Drug	7533_UP	11-deoxy-16,16-dimethyl Prostaglandin E2; Up 200; 10uM; MCF7; HT_HG-U133A	0.0003611	1	0.01707	0.177	10	197	MON2,ATP6V1C1,CLASP2,DDX3X,NFYA,ATL2,ZDHHC17,TRIM23,RNF6,SEC23IP
Drug	2934_DN	Memantine Hydrochloride [41100-52-1]; Down 200; 18.6uM; HL60; HT_HG-U133A	0.0003611	1	0.01707	0.177	10	197	ZNF155,BACH1,SOCS6,DCAF17,CUL2,MCPH1,PHTF2,TRIM23,IKZF5,PAPOLG
Drug	4806_UP	Adamantamine fumarate [80789-67-9]; Up 200; 9.6uM; MCF7; HT_HG-U133A	0.0003611	1	0.01707	0.177	10	197	ERCC6,LDAH,MBTPS2,NFYA,SEL1L,PTBP3,TRIM23,IKZF5,ZNF20,HERC4
Drug	3030_DN	Ganciclovir [82410-32-0]; Down 200; 15.6uM; HL60; HT_HG-U133A	0.0003611	1	0.01707	0.177	10	197	ERCC6,MDM2,NXPE3,MFAP3,DCAF17,MCPH1,PHTF2,TRIM23,CSE1L,HERC4
Drug	2522_DN	Napelline [5008-52-6]; Down 200; 11.2uM; HL60; HT_HG-U133A	0.0003611	1	0.01707	0.177	10	197	EPS15,KLHL24,TTC26,DDX3X,NFYA,WDR48,NUP98,PPP2R1B,ZNF83,NNT
Drug	5525_DN	Cyclizine hydrochloride [303-25-3]; Down 200; 13.2uM; MCF7; HT_HG-U133A	0.0003611	1	0.01707	0.177	10	197	SOCS6,DCAF17,POLR1B,ARMC8,WDR48,ZDHHC17,PAPOLG,PPP2R1B,PCNX4,HERC4
Drug	7462_DN	DO 897/99; Down 200; 8.2uM; MCF7; HT_HG-U133A	0.0003611	1	0.01707	0.177	10	197	MDM2,SNX13,PHKB,NFYA,ATL2,KPNA1,TRIM23,IKZF5,PCNX4,SEC23IP
Drug	3171_DN	Guanethidine sulfate [60-02-6]; Down 200; 13.4uM; MCF7; HT_HG-U133A	0.0003611	1	0.01707	0.177	10	197	RNGTT,GDAP1,MDM2,MBTPS2,NFYA,ATL2,PTBP3,PPP2R1B,ZNF20,HS2ST1
Drug	4732_DN	Cloperastine hydrochloride [14984-68-0]; Down 200; 11uM; MCF7; HT_HG-U133A	0.0003611	1	0.01707	0.177	10	197	NCBP1,SNX13,SLC35D1,NFYA,ATL2,ZBTB1,PDE12,IRAK4,NNT,RAB33B
Drug	6494_DN	Proxyphylline [603-00-9]; Down 200; 16.8uM; MCF7; HT_HG-U133A	0.0003611	1	0.01707	0.177	10	197	CLASP2,ADAM10,DDX3X,MBTPS2,HSPA4,WDR48,PTBP3,C12orf4,TRIM23,NNT
Drug	6277_DN	Propidium iodide [25535-16-4]; Down 200; 6uM; MCF7; HT_HG-U133A	0.0003611	1	0.01707	0.177	10	197	PHKB,PLAA,WDR48,ATG5,C12orf4,RBL2,ATF2,PPP2R1B,PPP2R5C,MTM1
Drug	6063_DN	Betonicine [515-25-3]; Down 200; 25.2uM; MCF7; HT_HG-U133A	0.0003611	1	0.01707	0.177	10	197	ATP6V1C1,FRS2,NCBP1,MDM2,LDAH,SNX13,PTBP3,PHTF2,HIPK3,TTC30A
Drug	2998_DN	Trichlormethiazide [133-67-5]; Down 200; 10.6uM; HL60; HT_HG-U133A	0.0003611	1	0.01707	0.177	10	197	ZSCAN12,FEM1C,PTK2,TTC26,ARMC8,WDR48,PTBP3,TRIM23,PPP2R1B,RNF6
Drug	4337_DN	Proglumide [6620-60-6]; Down 200; 12uM; PC3; HT_HG-U133A	0.0003611	1	0.01707	0.177	10	197	DDX3X,TWSG1,SEC23A,PTBP3,PHTF2,CLIC4,YTHDC2,HIPK3,RNF6,HERC4
Drug	5106_DN	Dropropizine (R,S) [17692-31-8]; Down 200; 17uM; PC3; HT_HG-U133A	0.0003611	1	0.01707	0.177	10	197	KLHL24,ATP6V1C1,RNGTT,FRS2,SNX13,MBTPS2,PHTF2,CLIC4,YTHDC2,ZNF10
Drug	5543_DN	Deptropine citrate [2169-75-7]; Down 200; 7.6uM; MCF7; HT_HG-U133A	0.0003759	1	0.01707	0.177	10	198	PTK2,NFYA,WDR48,SEL1L,PTBP3,ZNF254,RBM12,CSE1L,STK38L,NNT
Drug	1722_DN	Propafenone hydrochloride [34183-22-7]; Down 200; 10.6uM; HL60; HG-U133A	0.0003759	1	0.01707	0.177	10	198	KLHL24,BACH1,RIOK3,CLASP2,NFYA,TRAPPC11,CANX,ATF2,OPA1,PPP2R5C
Drug	7194_UP	Streptomycin sulfate [3810-74-0]; Up 200; 2.8uM; MCF7; HT_HG-U133A	0.0003759	1	0.01707	0.177	10	198	RINT1,MBTPS2,DCAF17,ZNF468,PTBP3,NEMP1,ZDHHC17,FOXJ3,RP2,NNT
Drug	2962_UP	Spaglumic acid [4910-46-7]; Up 200; 13.2uM; HL60; HT_HG-U133A	0.0003759	1	0.01707	0.177	10	198	FRS2,SNX13,FBXO38,CUL2,PTBP3,ZBTB33,MCPH1,ELP1,PAPOLG,PDE12
Drug	4779_UP	Pyrimethamine [58-14-0]; Up 200; 16uM; MCF7; HT_HG-U133A	0.0003759	1	0.01707	0.177	10	198	RNGTT,GDAP1,MDM2,ADAM10,NXPE3,MBTPS2,ZNF614,SEC23A,TRIM23,MSH6
Drug	4809_DN	Carcinine [56897-53-1]; Down 200; 22uM; MCF7; HT_HG-U133A	0.0003759	1	0.01707	0.177	10	198	ATP6V1C1,LDAH,DDX3X,DHX15,NFYA,HSPA4,SEL1L,ATG5,ATF2,HERC4
Drug	1571_DN	Alprenolol hydrochloride [13707-88-5]; Down 200; 14uM; HL60; HG-U133A	0.0003759	1	0.01707	0.177	10	198	EPS15,GIN1,RIOK3,PLAA,ZNF160,KPNA1,PHTF2,ZBTB1,PPP2R1B,RPRD1A
Drug	1328_DN	Pepstatin A [26305-03-3]; Down 200; 5.8uM; HL60; HT_HG-U133A	0.0003759	1	0.01707	0.177	10	198	ADAM10,DDX3X,FBXO38,NFYA,CLIC4,ATF2,C21orf91,PPP2R1B,RBM12,MTM1
Drug	1572_DN	Praziquantel [55268-74-1]; Down 200; 12.8uM; HL60; HG-U133A	0.0003759	1	0.01707	0.177	10	198	APH1B,ZC3H14,KLHL24,ERCC6,TRAPPC11,RBL2,IDE,CGGBP1,IKZF5,RNF6
Drug	3044_DN	3-Acetylcoumarin [3949-36-8]; Down 200; 21.2uM; HL60; HT_HG-U133A	0.0003759	1	0.01707	0.177	10	198	RNGTT,GDAP1,MDM2,PLAA,CUL4B,PTBP3,PHTF2,HIPK3,CSE1L,TTC30A
Drug	7126_UP	Oxybutynin chloride [1508-65-2]; Up 200; 10.2uM; PC3; HT_HG-U133A	0.0003759	1	0.01707	0.177	10	198	APH1B,SOCS6,MFAP3,PLAA,ATL2,C18orf25,PDE12,CSE1L,PTCD2,RAB33B
Drug	1426_DN	Alverine citrate salt [5560-59-8]; Down 200; 8.4uM; HL60; HG-U133A	0.0003759	1	0.01707	0.177	10	198	ATP6V1C1,RIOK3,ADAM10,LAMP2,ATF2,THADA,ATP2C1,RPRD1A,RNF6,RP2
Drug	3557_DN	Ronidazole [7681-76-7]; Down 200; 20uM; MCF7; HT_HG-U133A	0.0003759	1	0.01707	0.177	10	198	RNGTT,MDM2,DDX3X,NFYA,HSPA4,KPNA1,ARMC8,SEL1L,ZDHHC17,ZNF20
Drug	6250_DN	Dubinidine [22964-77-8]; Down 200; 14.6uM; MCF7; HT_HG-U133A	0.0003759	1	0.01707	0.177	10	198	RNGTT,GDAP1,MDM2,EFEMP1,PIGA,NFYA,ZNF160,ARMC8,WDR48,NNT
Drug	1579_DN	Tremorine dihydrochloride [300-68-5]; Down 200; 15uM; HL60; HG-U133A	0.0003759	1	0.01707	0.177	10	198	GIN1,KLHL9,SERINC1,SLC39A6,TRAPPC11,PHTF2,LAMP2,STAM,MSH6,ZNF84
Drug	2125_UP	Iproniazide phosphate [305-33-9]; Up 200; 14.4uM; PC3; HT_HG-U133A	0.0003759	1	0.01707	0.177	10	198	SPIN1,ZNF614,ZBTB33,RBL2,PHTF2,TRIM23,IKZF5,PAPOLG,PPP2R1B,PDE12
Drug	6525_DN	Nomegestrol acetate [58652-20-3]; Down 200; 10.8uM; MCF7; HT_HG-U133A	0.0003759	1	0.01707	0.177	10	198	ERCC6,BACH1,ADAM10,KLHL9,MBTPS2,DCAF17,CUL2,NEMP1,PHTF2,TRIM23
Drug	1435_DN	Aztreonam [78110-38-0]; Down 200; 9.2uM; HL60; HG-U133A	0.0003759	1	0.01707	0.177	10	198	MATR3,RIOK3,RBL2,RANBP6,LAMP2,STAM,RPRD1A,TMEM267,STK38L,PRRC1
Drug	4733_DN	Sulfamethoxypyridazine [80-35-3]; Down 200; 14.2uM; MCF7; HT_HG-U133A	0.0003759	1	0.01707	0.177	10	198	ADAM10,SNX13,MBTPS2,NFYA,HSPA4,ARMC8,CUL4B,YTHDC2,FASTKD2,HERC4
Drug	3417_DN	Deferoxamine mesylate [138-14-7]; Down 200; 6uM; MCF7; HT_HG-U133A	0.0003759	1	0.01707	0.177	10	198	RNGTT,CLASP2,SOCS6,ADAM10,LDAH,NFYA,ZNF468,ZDHHC17,CSE1L,HERC4
Drug	3129_DN	Isradipine [75695-93-1]; Down 200; 10.8uM; HL60; HT_HG-U133A	0.0003759	1	0.01707	0.177	10	198	NXPE3,TWSG1,HSPA4,FOXN2,PHTF2,HIPK3,C18orf25,PPP2R1B,ATP2C1,STK38L
Drug	782_UP	estradiol, USP; Up 200; 0.01uM; HL60; HG-U133A	0.0003759	1	0.01707	0.177	10	198	EPS15,DDX3X,RINT1,NFYA,WDR48,PTBP3,CLIC4,TMEM168,USO1,SEC23IP
Drug	6256_DN	Bupropion hydrochloride [31677-93-7]; Down 200; 14.4uM; MCF7; HT_HG-U133A	0.0003911	1	0.01707	0.177	10	199	RNGTT,ZNF813,PLAA,NFYA,WDR48,PAPOLG,RBM12,PCNX4,SEC23IP,PTCD2
Drug	1466_DN	Naphazoline hydrochloride [550-99-2]; Down 200; 16.2uM; MCF7; HT_HG-U133A	0.0003911	1	0.01707	0.177	10	199	RNGTT,MDM2,FBXO38,MFAP3,ARMC8,TRAPPC11,YTHDC2,RNF6,AKAP10,HERC4
Drug	1705_UP	Dapsone [80-08-0]; Up 200; 16.2uM; MCF7; HT_HG-U133A	0.0003911	1	0.01707	0.177	10	199	ATP6V1C1,ERCC6,SEC24A,FRS2,NCBP1,MBTPS2,NFYA,ATL2,YTHDC2,HIPK3
Drug	4390_DN	Cefixime [79350-37-1]; Down 200; 8.8uM; MCF7; HT_HG-U133A	0.0003911	1	0.01707	0.177	10	199	PIGN,SOCS6,ADAM10,SLC35D1,PTBP3,SGCB,YTHDC2,ATF2,MTM1,ZW10
Drug	1889_DN	Dibucaine [85-79-0]; Down 200; 11.6uM; PC3; HG-U133A	0.0003911	1	0.01707	0.177	10	199	EPS15,RIOK3,DDX3X,SERINC1,SLC39A6,ZNF468,CUL2,NUDT21,OPA1,PCNX4
Drug	7211_DN	Isoconazole [27523-40-6]; Down 200; 9.6uM; MCF7; HT_HG-U133A	0.0003911	1	0.01707	0.177	10	199	ZNF813,CLASP2,EFEMP1,MBTPS2,POLR1B,WDR48,CUL2,OPA1,CSE1L,SEC23IP
Drug	7524_DN	Suramin sodium salt; Down 200; 10uM; MCF7; HT_HG-U133A	0.0003911	1	0.01707	0.177	10	199	RNGTT,RIOK3,CLASP2,MDM2,NFYA,ZNF468,PTBP3,TTC30A,RP2,STK38L
Drug	1305_DN	Carcinine [56897-53-1]; Down 200; 22uM; HL60; HT_HG-U133A	0.0003911	1	0.01707	0.177	10	199	MATR3,NCBP1,GFPT1,DDX3X,SLC39A6,HSPA4,SEC23A,ARMC8,SEC23IP,PTCD2
Drug	1554_DN	Guanethidine sulfate [60-02-6]; Down 200; 13.4uM; HL60; HG-U133A	0.0003911	1	0.01707	0.177	10	199	ZC3H14,EPS15,NFYA,TRAPPC11,CPSF6,RBL2,LAMP2,MTM1,PCMTD2,ZW10
Drug	6492_DN	Proparacaine hydrochloride [5875-06-9]; Down 200; 12uM; MCF7; HT_HG-U133A	0.0003911	1	0.01707	0.177	10	199	CLASP2,MBTPS2,CUL2,NEMP1,NUP98,TRIM23,PPP2R1B,SEC23IP,NNT,HERC4
Drug	1893_UP	Doxylamine succinate [562-10-7]; Up 200; 10.2uM; PC3; HG-U133A	0.0003911	1	0.01707	0.177	10	199	EPS15,KLHL24,RNGTT,RIOK3,SOCS6,ZNF468,ZNF160,ARMC8,ATP2C1,DOP1A
Drug	3445_DN	Vidarabine [5536-17-4]; Down 200; 15uM; MCF7; HT_HG-U133A	0.0003911	1	0.01707	0.177	10	199	FEM1C,MDM2,ADAM10,SEC23A,PTBP3,PHTF2,ATF2,TRIM23,ZNF20,RNF6
Drug	1292_DN	Clebopride maleate [84370-95-6]; Down 200; 8.2uM; HL60; HT_HG-U133A	0.0003911	1	0.01707	0.177	10	199	APH1B,LDAH,POLR1B,SEC23A,STAM,ZDHHC17,BBS10,SEC23IP,STK38L,HERC4
Drug	1751_DN	Stachydrine hydrochloride; Down 200; 22.2uM; HL60; HG-U133A	0.0003911	1	0.01707	0.177	10	199	CLASP2,ADAM10,MED23,UBR2,RBL2,LAMP2,ATP2C1,NDC1,PCMTD2,ZW10
Drug	1596_UP	Desipramine hydrochloride [58-28-6]; Up 200; 13.2uM; HL60; HG-U133A	0.0003911	1	0.01707	0.177	10	199	SEC24A,RIOK3,KPNA1,PTBP3,PPP2R5C,USO1,HS2ST1,TMEM184C,RP2,PRRC1
Drug	2347_DN	Tropicamide [1508-75-4]; Down 200; 14uM; HL60; HT_HG-U133A	0.0003911	1	0.01707	0.177	10	199	KLHL24,SOCS6,LDAH,GFPT1,NFYA,WDR48,SEL1L,PTBP3,IRAK4,ZNF83
Drug	7217_DN	Nomifensine maleate [32795-47-4]; Down 200; 11.2uM; MCF7; HT_HG-U133A	0.0003911	1	0.01707	0.177	10	199	RNGTT,CLASP2,EFEMP1,MKLN1,WDR48,PTBP3,C18orf25,RP2,NNT,DOP1A
Drug	2367_UP	Vincamine [1617-90-9]; Up 200; 11.2uM; HL60; HT_HG-U133A	0.0003911	1	0.01707	0.177	10	199	ATP6V1C1,BACH1,FRS2,MFAP3,MBTPS2,DCAF17,SEL1L,NEMP1,ZNF254,PDE12
Drug	1490_DN	Diflunisal [22494-42-4]; Down 200; 16uM; MCF7; HT_HG-U133A	0.0004069	1	0.01759	0.1824	10	200	MDM2,MFAP3,EFEMP1,NFYA,CUL2,PHTF2,RNF6,PTCD2,RP2,HERC4
Drug	995_DN	prochlorperazine dimaleate salt; Down 200; 10uM; MCF7; HT_HG-U133A_EA	0.0004069	1	0.01759	0.1824	10	200	MDM2,MFAP3,PHTF2,YTHDC2,ZDHHC17,TRIM23,PAPOLG,CSE1L,RNF6,HERC4
Drug	5502_UP	Isometheptene mucate; Up 200; 8.2uM; MCF7; HT_HG-U133A	0.0004069	1	0.01759	0.1824	10	200	PIGN,KLHL24,MDM2,SNX13,MBTPS2,NFYA,PTBP3,FOXN2,RCHY1,HIPK3
Drug	1060_DN	2-propylpentanoic acid; Down 200; 50uM; MCF7; HT_HG-U133A_EA	0.0004069	1	0.01759	0.1824	10	200	APH1B,ATP6V1C1,RXYLT1,KLHL9,EFEMP1,WDR48,CPSF6,RBL2,ATP2C1,PCNX4
Drug	ctd:D019345	Zinc Acetate	0.0004387	1	0.01891	0.1962	9	166	HIF1A,BACH1,MDM2,SLC38A2,HSPA4,CANX,PHTF2,ELP1,SLC39A10
Drug	CID000173651	ML-236A	0.0004802	1	0.02065	0.2142	8	134	COPB2,ADAM10,PIGA,AP1G1,CLTC,VPS4B,STAM,TARDBP
Drug	1056_UP	17-AAG; Up 200; 1uM; MCF7; HT_HG-U133A_EA	0.0004997	1	0.02144	0.2224	9	169	SEC24A,GFPT1,GTF3C3,TMEM41B,ARMC8,SEL1L,ATF2,ATP2C1,PRRC1
Drug	1631_UP	17-AAG; Up 200; 1uM; MCF7; HT_HG-U133A	0.0005215	1	0.02232	0.2315	9	170	MDM2,GTF3C3,TMEM41B,MED23,SEL1L,ATF2,ZNF10,ZNF20,ZNF654
Drug	CID000178117	pyribenzoxim	0.0005393	1	0.02303	0.2389	2	3	MCPH1,INTS6
Drug	1064_UP	17-AAG; Up 200; 1uM; MCF7; HT_HG-U133A_EA	0.0005674	1	0.02417	0.2507	9	172	GFPT1,GTF3C3,TMEM41B,ZNF614,ARMC8,SEL1L,ATF2,RNF6,PRRC1
Drug	1122_UP	cytochalasin B; Up 200; 20.8uM; MCF7; HT_HG-U133A_EA	0.0005916	1	0.02514	0.2608	9	173	KLHL24,SLC38A2,CUL4B,VPS8,PHTF2,CLIC4,LAMP2,PCNX4,NNT
Drug	5026_DN	Strophantine octahydrate [11018-89-6]; Down 200; 5.4uM; MCF7; HT_HG-U133A	0.0007257	1	0.03077	0.3191	9	178	ZC3H14,KLHL9,S100PBP,TRAPPC11,ELP1,PALB2,GTF2E1,RBM12,ZNF83
Drug	4541_DN	Camptothecine (S,+) [7689-03-4]; Down 200; 11.4uM; PC3; HT_HG-U133A	0.0007858	1	0.03324	0.3447	9	180	SOCS6,SLC38A2,KLHL9,NFYA,PITPNB,FBXO34,HSPBAP1,FOXJ3,WDR47
Drug	CID000006413	VTCs	0.0007963	1	0.0336	0.3485	5	54	COPB2,COPB1,CANX,ARCN1,USO1
Drug	2957_DN	Pyrvinium pamoate [3546-41-6]; Down 200; 3.4uM; HL60; HT_HG-U133A	0.0008173	1	0.03441	0.3569	9	181	MFAP3,PIGA,MBTPS2,PHTF2,ZDHHC17,OPA1,MSH6,RNF6,ZNF654
Drug	ctd:D006046	Gold	0.0008425	1	0.03539	0.367	15	432	SEC24A,SMARCAD1,ZUP1,NUDT12,PIGA,ATL2,HSPA4,SEC23A,DCP2,UBA2,ZDHHC17,TRIM23,RBM12,SAR1B,RP2
Drug	1074_UP	LY 294002; Up 200; 10uM; MCF7; HT_HG-U133A_EA	0.0008835	1	0.03693	0.3831	9	183	KLHL24,RIOK3,PHKB,SERINC1,MED23,WDR48,FOXJ3,TRIM23,PCMTD2
Drug	978_DN	pyrvinium pamoate; Down 200; 1.25uM; MCF7; HT_HG-U133A_EA	0.0008835	1	0.03693	0.3831	9	183	ZNF813,LDAH,KLHL9,ARMC8,PTBP3,PHTF2,RANBP6,MSH6,RBM12
Drug	CID000439502	poly(G	0.0009126	1	0.03794	0.3935	7	114	PTBP3,NUDT21,CPSF6,NUP98,PAPOLG,MSH6,LRPPRC
Drug	7056_DN	Alsterpaullone; Down 200; 10uM; PC3; HT_HG-U133A	0.0009181	1	0.03794	0.3935	9	184	DDX3X,SLC38A2,KLHL9,NFYA,ZNF468,FBXO34,HSPBAP1,RANBP6,MSH6
Drug	1051_UP	17-DMAG; Up 200; 0.1uM; MCF7; HT_HG-U133A_EA	0.0009181	1	0.03794	0.3935	9	184	GTF3C3,PLAA,TMEM41B,HSPA4,ARMC8,SEL1L,OPA1,WDR47,RNF6
Drug	1772_DN	Hydrocotarnine hydrobromide [5985-00-2]; Down 200; 13.2uM; HL60; HG-U133A	0.0009181	1	0.03794	0.3935	9	184	ATP6V1C1,TSN,ADAM10,GFPT1,DDX3X,WDR48,NEMP1,CANX,HS2ST1
Drug	5671_DN	Doxorubicin hydrochloride [25316-40-9]; Down 200; 6.8uM; MCF7; HT_HG-U133A	0.0009181	1	0.03794	0.3935	9	184	ZNF267,SLC38A2,KLHL9,RANBP6,PALB2,GTF2E1,TBK1,ZNF84,DOP1A
Drug	1114_DN	tyrphostin AG-825; Down 200; 25.2uM; MCF7; HT_HG-U133A_EA	0.0009539	1	0.03924	0.407	9	185	SLC38A2,KLHL9,FBXO34,S100PBP,PALB2,WDR47,GTF2E1,TBK1,DOP1A
Drug	6711_DN	Puromycin dihydrochloride [58-58-2]; Down 200; 7.4uM; PC3; HT_HG-U133A	0.0009539	1	0.03924	0.407	9	185	TSN,GFPT1,PTK2,DDX3X,MBTPS2,CUL4B,PHTF2,ZDHHC17,MSH6
Drug	CID000435143	NSC-364372	0.0009602	1	0.03941	0.4087	16	484	HIF1A,TP53INP1,MDM2,ADAM10,DDX3X,CLTC,HSPA4,KPNA1,CUL2,NRDC,RCHY1,RBL2,ZDHHC17,NMD3,CSE1L,MAPK6
Drug	CID000068262	DMBQ	0.0009807	1	0.04016	0.4165	3	15	DLD,TBCCD1,GTF2E1
Drug	1339_DN	Digitoxigenin [143-62-4]; Down 200; 10.6uM; HL60; HT_HG-U133A	0.0009908	1	0.04048	0.4198	9	186	ZC3H14,KLHL9,PALB2,MSH6,GTF2E1,RBM12,MTM1,PCMTD2,ZW10
Drug	7080_DN	GW8510; Down 200; 10uM; MCF7; HT_HG-U133A	0.001029	1	0.04175	0.433	9	187	SLC38A2,KLHL9,FBXO34,S100PBP,RANBP6,PALB2,GTF2E1,TBK1,ZNF84
Drug	1218_UP	17-AAG; Up 200; 1uM; PC3; HT_HG-U133A	0.001029	1	0.04175	0.433	9	187	RNGTT,BACH1,HSPA4,ARMC8,SEL1L,CUL2,YTHDC2,FASTKD2,HERC4
Drug	2758_DN	Ellipticine [519-23-3]; Down 200; 16.2uM; MCF7; HT_HG-U133A	0.001029	1	0.04175	0.433	9	187	RNGTT,ZNF267,SOCS6,SLC38A2,KLHL9,NFYA,RANBP6,ZBTB1,TBK1
Drug	2461_DN	Iohexol [66108-95-0]; Down 200; 4.8uM; HL60; HT_HG-U133A	0.001068	1	0.04308	0.4469	9	188	KLHL24,RNGTT,NCBP1,DDX3X,MBTPS2,ZNF160,ZDHHC17,ZW10,ZNF654
Drug	3291_DN	Doxorubicin hydrochloride [25316-40-9]; Down 200; 6.8uM; MCF7; HT_HG-U133A	0.001068	1	0.04308	0.4469	9	188	GIN1,ZNF267,SLC38A2,KLHL9,NFYA,HSPBAP1,RANBP6,PALB2,ZNF84
Drug	CID000128871	N-acetyl-3-hydroxykynurenine	0.001069	1	0.04308	0.4469	2	4	TBCCD1,TBK1
Drug	2800_DN	Protoveratrine A [143-57-7]; Down 200; 5uM; MCF7; HT_HG-U133A	0.001109	1	0.0432	0.4481	9	189	KLHL24,TWSG1,WDR48,ATG5,UBR2,YTHDC2,PAPOLG,ZNF10,C1orf115
Drug	6717_DN	Promethazine hydrochloride [58-33-3]; Down 200; 12.4uM; PC3; HT_HG-U133A	0.001109	1	0.0432	0.4481	9	189	ATP6V1C1,GDAP1,DDX3X,SEC23A,PHTF2,FASTKD2,MSH6,CSE1L,HERC4
Drug	7074_DN	MS-275; Down 200; 10uM; PC3; HT_HG-U133A	0.001109	1	0.0432	0.4481	9	189	SEC24A,SEC23A,WDR48,SEL1L,UBR2,NEMP1,RBL2,MSH6,SEC23IP
Drug	1288_DN	Flupentixol dihydrochloride cis-(Z) [2413-38-9]; Down 200; 7.8uM; HL60; HT_HG-U133A	0.001109	1	0.0432	0.4481	9	189	ADAM10,PIGA,SEC23A,SEL1L,PTBP3,CGGBP1,SF3B1,PRRC1,DOP1A
Drug	2195_UP	Lycorine hydrochloride [2188-68-3]; Up 200; 12.4uM; HL60; HT_HG-U133A	0.001144	1	0.0432	0.4481	8	153	AP1G1,MKLN1,NEMP1,C21orf91,C18orf25,ATP2C1,STK38L,DOP1A
Drug	3297_DN	Bisacodyl [603-50-9]; Down 200; 11uM; MCF7; HT_HG-U133A	0.00115	1	0.0432	0.4481	9	190	KLHL9,S100PBP,HSPBAP1,RANBP6,PALB2,BBS10,GTF2E1,ZW10,HCCS
Drug	4306_DN	Deltaline [6836-11-9]; Down 200; 7.8uM; PC3; HT_HG-U133A	0.00115	1	0.0432	0.4481	9	190	MON2,CCP110,KLHL24,SPIN1,SEL1L,PTBP3,SGCB,TRIM23,HERC4
Drug	6712_DN	S-(+)-ibuprofen [51146-56-6]; Down 200; 19.4uM; PC3; HT_HG-U133A	0.001193	1	0.0432	0.4481	9	191	RNGTT,GDAP1,DDX3X,EFEMP1,PLAA,MBTPS2,CANX,PHTF2,PPP2R1B
Drug	2466_DN	Azathymine, 6 [932-53-6]; Down 200; 31.4uM; HL60; HT_HG-U133A	0.001193	1	0.0432	0.4481	9	191	RNGTT,SPIN1,NFYA,ATL2,ARMC8,SGCB,CSE1L,SF3B1,SEC23IP
Drug	6933_UP	17-DMAG; Up 200; 0.1uM; MCF7; HT_HG-U133A	0.001193	1	0.0432	0.4481	9	191	GFPT1,EFEMP1,NFYA,TMEM41B,SEL1L,UBR2,FOXJ3,ZNF10,CCDC87
Drug	4647_DN	Butylparaben [94-26-8]; Down 200; 20.6uM; PC3; HT_HG-U133A	0.001193	1	0.0432	0.4481	9	191	ATP6V1C1,RNGTT,DDX3X,SNX13,FBXO38,MBTPS2,NFYA,CANX,FOXJ3
Drug	1986_UP	Thioridazine hydrochloride [130-61-0]; Up 200; 9.8uM; HL60; HG-U133A	0.001193	1	0.0432	0.4481	9	191	KLHL24,ZSCAN12,GIN1,SEC24A,GFPT1,TMEM41B,COPB1,ATP2C1,PCMTD2
Drug	5327_UP	Benfluorex hydrochloride [23642-66-2]; Up 200; 10.4uM; MCF7; HT_HG-U133A	0.001193	1	0.0432	0.4481	9	191	KLHL24,SOCS6,NXPE3,ZNF468,PTBP3,ATF2,PAPOLG,MTM1,STK38L
Drug	941_DN	rottlerin; Down 200; 10uM; MCF7; HT_HG-U133A_EA	0.001193	1	0.0432	0.4481	9	191	ZNF160,WDR48,SEL1L,CUL2,RANBP6,MSH6,PPP2R1B,C1orf115,RBM12
Drug	ctd:C572491	3-(2-hydroxy-4-(2-methylnonan-2-yl)phenyl)cyclohexan-1-ol	0.001226	1	0.0432	0.4481	12	314	MATR3,GDAP1,GFPT1,RINT1,SPIN1,DLD,CPSF6,DCP2,PPP2R1B,MTM1,TBK1,HCCS
Drug	4267_DN	Demeclocycline hydrochloride [64-73-3]; Down 200; 8uM; PC3; HT_HG-U133A	0.001237	1	0.0432	0.4481	9	192	KLHL24,ZNF813,ZNF614,SEL1L,TRIM23,PAPOLG,ZNF10,RP2,HERC4
Drug	3245_DN	Fusaric acid [536-69-6]; Down 200; 22.4uM; MCF7; HT_HG-U133A	0.001237	1	0.0432	0.4481	9	192	DDX3X,MBTPS2,HSPA4,TRAPPC11,OPA1,TRIM23,IKZF5,RNF6,AKAP10
Drug	4334_DN	0317956-0000 [391210-11-0]; Down 200; 1uM; PC3; HT_HG-U133A	0.001237	1	0.0432	0.4481	9	192	ATP6V1C1,DDX3X,MBTPS2,SEC23A,CLIC4,TRIM23,MSH6,RNF6,HERC4
Drug	4288_DN	PNU-0230031 [267429-39-0]; Down 200; 10uM; PC3; HT_HG-U133A	0.001237	1	0.0432	0.4481	9	192	ATP6V1C1,DDX3X,SEL1L,NEMP1,PHTF2,TRIM23,HIPK3,TTC30A,ZW10
Drug	1647_DN	2-propylpentanoic acid; Down 200; 50uM; MCF7; HT_HG-U133A	0.001237	1	0.0432	0.4481	9	192	LDAH,GTF3C3,DDX3X,KLHL9,SEC23A,NEMP1,NUDT21,NNT,HERC4
Drug	4144_DN	Cimetidine [51481-61-9]; Down 200; 15.8uM; MCF7; HT_HG-U133A	0.001237	1	0.0432	0.4481	9	192	RNGTT,MDM2,ATL2,ZNF614,HIPK3,PDE12,MTM1,STK38L,HERC4
Drug	977_DN	wortmannin; Down 200; 1uM; MCF7; HT_HG-U133A_EA	0.001237	1	0.0432	0.4481	9	192	ZC3H14,RNGTT,POLR1B,HSPA4,ARMC8,TARDBP,MSH6,SEC23IP,HCCS
Drug	6817_DN	Verteporfin [129497-78-5]; Down 200; 2.8uM; MCF7; HT_HG-U133A	0.001244	1	0.0432	0.4481	8	155	ADAM10,MFAP3,SERINC1,SEL1L,NEMP1,CANX,LAMP2,HS2ST1
Drug	7418_DN	Glafenine hydrochloride [65513-72-6]; Down 200; 9.8uM; MCF7; HT_HG-U133A	0.001283	1	0.0432	0.4481	9	193	KLHL24,RNGTT,ZNF813,FRS2,DDX3X,HSPA4,WDR48,PTBP3,RBL2
Drug	3209_DN	Ketanserin tartrate hydrate [83846-83-7]; Down 200; 7uM; MCF7; HT_HG-U133A	0.001283	1	0.0432	0.4481	9	193	GDAP1,SNX13,MBTPS2,DCAF17,SEC23A,PTBP3,TRIM23,RNF6,HERC4
Drug	3251_UP	Carisoprodol [78-44-4]; Up 200; 15.4uM; MCF7; HT_HG-U133A	0.001283	1	0.0432	0.4481	9	193	ZSCAN12,MATR3,SNX13,MBTPS2,KPNA1,YTHDC2,IKZF5,MSH6,ZW10
Drug	1550_DN	Labetalol hydrochloride [32780-64-6]; Down 200; 11uM; HL60; HG-U133A	0.001283	1	0.0432	0.4481	9	193	ZC3H14,RNGTT,AP1G1,NFYA,KPNA1,HSPBAP1,NUP98,LAMP2,PPP2R1B
Drug	4136_DN	Niclosamide [50-65-7]; Down 200; 12.2uM; MCF7; HT_HG-U133A	0.001283	1	0.0432	0.4481	9	193	RNGTT,GDAP1,ARMC8,PTBP3,YTHDC2,TRIM23,MSH6,C1orf115,RBM12
Drug	6435_DN	AG-013608 [351320-38-2]; Down 200; 10uM; MCF7; HT_HG-U133A	0.001283	1	0.0432	0.4481	9	193	RNGTT,DDX3X,FBXO38,MFAP3,NFYA,RBL2,ZBTB1,SEC23IP,HERC4
Drug	6704_DN	Methylergometrine maleate [113-42-8]; Down 200; 8.8uM; PC3; HT_HG-U133A	0.001283	1	0.0432	0.4481	9	193	DDX3X,SNX13,SEC23A,NUDT21,CANX,PHTF2,TRIM23,PDE12,NNT
Drug	1301_UP	Domperidone maleate; Up 200; 7.4uM; HL60; HT_HG-U133A	0.001283	1	0.0432	0.4481	9	193	RXYLT1,MDM2,TTC26,DDX3X,ARMC8,WDR48,SEL1L,CLIC4,CSE1L
Drug	6981_DN	Rapamycin; Down 200; 0.1uM; MCF7; HT_HG-U133A	0.001283	1	0.0432	0.4481	9	193	RNGTT,SEC24A,DDX3X,KPNA1,C21orf91,RNF6,MTM1,RP2,HCCS
Drug	6931_DN	retinoic acid; Down 200; 1uM; MCF7; HT_HG-U133A	0.001283	1	0.0432	0.4481	9	193	ZNF268,BACH1,FEM1C,ZNF468,WDR48,ZNF254,PHTF2,PPP2R1B,HERC4
Drug	1363_DN	Naltrexone hydrochloride dihydrate [16676-29-2]; Down 200; 9.6uM; HL60; HG-U133A	0.001283	1	0.0432	0.4481	9	193	GIN1,GFPT1,KPNA1,WDR48,CLIC4,CREBL2,SEC23IP,IRAK4,AKAP10
Drug	835_DN	carbamazepine; Down 200; 0.1uM; MCF7; HT_HG-U133A_EA	0.001283	1	0.0432	0.4481	9	193	ZNF813,SLC35D1,ZNF254,PHTF2,YTHDC2,CSE1L,ZW10,NNT,HERC4
Drug	7097_UP	GSK-3beta Inhibitor VIII; Up 200; 10uM; PC3; HT_HG-U133A	0.001283	1	0.0432	0.4481	9	193	ATP6V1C1,SEC24A,KLHL9,NFYA,CUL4B,NUDT21,YTHDC2,PPP2R5C,RBM12
Drug	ctd:D008767	Methylmercury Compounds	0.001317	1	0.0432	0.4481	23	851	COPB2,MDM2,GFPT1,DDX1,SLC35D1,SLC38A2,RAB10,PIGA,WDR75,AP1G1,CUL4B,WDR36,POLR2B,UBA2,LAMP2,PPAT,HIPK3,MSH6,PPP2R1B,AKTIP,SEC23IP,DDX3Y,ELP2
Drug	7481_DN	(-)-Quinpirole hydrochloride [85760-74-3]; Down 200; 15.6uM; MCF7; HT_HG-U133A	0.00133	1	0.0432	0.4481	9	194	CLASP2,SNX13,FBXO38,MBTPS2,NFYA,PTBP3,TRAPPC11,TRIM23,IKZF5
Drug	1925_DN	Bromocryptine mesylate [22260-51-1]; Down 200; 5.4uM; PC3; HG-U133A	0.00133	1	0.0432	0.4481	9	194	RIOK3,RBL2,PHTF2,YTHDC2,FASTKD2,ECT2,ATP2C1,HS2ST1,ZBTB11
Drug	258_UP	LY294002; Up 200; 10uM; MCF7; HG-U133A	0.00133	1	0.0432	0.4481	9	194	KLHL24,PEX13,TTC26,FBXO38,WDR48,ZDHHC17,CREBL2,ZNF10,ATP2C1
Drug	6555_DN	Prostaglandin E1; Down 200; 10uM; PC3; HT_HG-U133A	0.00133	1	0.0432	0.4481	9	194	ATP6V1C1,MDM2,ADAM10,SNX13,MBTPS2,ATL2,HSPA4,CLIC4,DOP1A
Drug	6243_DN	Retinoic acid [302-79-4]; Down 200; 13.4uM; MCF7; HT_HG-U133A	0.00133	1	0.0432	0.4481	9	194	APH1B,EPS15,ATP6V1C1,KLHL9,EFEMP1,WDR48,C21orf91,C1orf115,NNT
Drug	898_UP	5213008; Up 200; 18uM; MCF7; HT_HG-U133A_EA	0.00133	1	0.0432	0.4481	9	194	KLHL24,RNGTT,FRS2,MBTPS2,PHTF2,CLIC4,FOXJ3,TRIM23,HIPK3
Drug	1988_DN	Captopril [62571-86-2]; Down 200; 17.2uM; HL60; HG-U133A	0.00133	1	0.0432	0.4481	9	194	MATR3,RIOK3,LDAH,DHX15,NUP98,NMD3,MSH6,SEC23IP,PRRC1
Drug	5826_DN	Strophanthidin [66-28-4]; Down 200; 9.8uM; PC3; HT_HG-U133A	0.00133	1	0.0432	0.4481	9	194	ZC3H14,RNGTT,POLR1B,ARMC8,S100PBP,UBR2,PALB2,MSH6,SEC23IP
Drug	6767_DN	Leucomisine [17946-87-1]; Down 200; 16.2uM; MCF7; HT_HG-U133A	0.00133	1	0.0432	0.4481	9	194	FRS2,NFYA,ARMC8,PTBP3,PHTF2,IKZF5,MTM1,ZNF84,HERC4
Drug	3447_DN	Hexylcaine hydrochloride [532-76-3]; Down 200; 13.4uM; MCF7; HT_HG-U133A	0.00133	1	0.0432	0.4481	9	194	MBTPS2,CANX,ZNF254,PHTF2,YTHDC2,FOXJ3,RNF6,MTM1,AKAP10
Drug	3460_DN	Pipenzolate bromide [125-51-9]; Down 200; 9.2uM; MCF7; HT_HG-U133A	0.00133	1	0.0432	0.4481	9	194	KLHL24,CLASP2,FEM1C,ATF2,WDR47,TARDBP,RNF6,MTM1,NNT
Drug	906_DN	calmidazolium chloride; Down 200; 5uM; MCF7; HT_HG-U133A_EA	0.00133	1	0.0432	0.4481	9	194	RNGTT,GDAP1,ZNF813,ZNF160,KPNA1,CUL2,TARDBP,CSE1L,IRAK4
Drug	6705_DN	Moroxidine hydrochloride [3160-91-6]; Down 200; 19.2uM; PC3; HT_HG-U133A	0.00133	1	0.0432	0.4481	9	194	NCBP1,DDX3X,NXPE3,SEC23A,PTBP3,CANX,PHTF2,RNF6,NNT
Drug	4263_DN	Primaquine diphosphate [63-45-6]; Down 200; 8.8uM; PC3; HT_HG-U133A	0.00133	1	0.0432	0.4481	9	194	RNGTT,GDAP1,MBTPS2,POLR1B,ZNF254,PHTF2,FOXJ3,TMEM168,PTCD2
Drug	3795_DN	alpha-Santonin [481-06-1]; Down 200; 16.2uM; PC3; HT_HG-U133A	0.00133	1	0.0432	0.4481	9	194	ATP6V1C1,RNGTT,MDM2,SNX13,PLAA,MBTPS2,NFYA,HSPA4,HIPK3
Drug	6995_DN	LY 294002; Down 200; 10uM; MCF7; HT_HG-U133A	0.00133	1	0.0432	0.4481	9	194	ZC3H14,SEC24A,EFEMP1,CUL2,C12orf4,ELP1,METTL4,MSH6,CSE1L
Drug	3035_DN	Sulconazole nitrate [61318-91-0]; Down 200; 8.6uM; HL60; HT_HG-U133A	0.00133	1	0.0432	0.4481	9	194	APH1B,RNGTT,MDM2,NFYA,SEL1L,CUL2,YTHDC2,ATF2,RAB33B
Drug	2467_DN	Omeprazole [73590-58-6]; Down 200; 11.6uM; HL60; HT_HG-U133A	0.00133	1	0.0432	0.4481	9	194	RNGTT,BACH1,NFYA,PTBP3,NEMP1,RCHY1,HIPK3,C21orf91,RNF6
Drug	2637_DN	Buspirone hydrochloride [33386-08-2]; Down 200; 9.4uM; MCF7; HT_HG-U133A	0.00133	1	0.0432	0.4481	9	194	RNGTT,ADAM10,MBTPS2,CUL4B,C12orf4,FOXJ3,MTM1,IRAK4,AKAP10
Drug	4653_DN	Phthalylsulfathiazole [85-73-4]; Down 200; 10uM; PC3; HT_HG-U133A	0.001378	1	0.0432	0.4481	9	195	ATP6V1C1,FBXO38,NFYA,ZNF614,CANX,PHTF2,FOXJ3,TRIM23,MSH6
Drug	450_UP	17-AAG; Up 200; 1uM; PC3; HG-U133A	0.001378	1	0.0432	0.4481	9	195	FBXO38,PLAA,SLC39A6,SEL1L,RBL2,LAMP2,ATF2,SEC23IP,RP2
Drug	5313_UP	Hesperidin [520-26-3]; Up 200; 6.6uM; MCF7; HT_HG-U133A	0.001378	1	0.0432	0.4481	9	195	GDAP1,NCBP1,NUDT21,ZNF254,ZBTB1,PDE12,CSE1L,RNF6,HERC4
Drug	4957_DN	Palmatine chloride [3486-67-7]; Down 200; 10.4uM; MCF7; HT_HG-U133A	0.001378	1	0.0432	0.4481	9	195	KLHL24,ZSCAN12,MDM2,CUL4B,NEMP1,ZDHHC17,FOXJ3,CSE1L,STK38L
Drug	6234_DN	Phenazopyridine hydrochloride [136-40-3]; Down 200; 16uM; MCF7; HT_HG-U133A	0.001378	1	0.0432	0.4481	9	195	SOCS6,SLC35D1,RINT1,NFYA,C12orf4,ATP2C1,RBM12,HS2ST1,ZNF83
Drug	3366_DN	Dichlorphenamide [120-97-8]; Down 200; 13.2uM; MCF7; HT_HG-U133A	0.001378	1	0.0432	0.4481	9	195	PIGN,KLHL24,ZSCAN12,RNGTT,SLC35D1,ZNF160,RCHY1,ZDHHC17,PDE12
Drug	6129_DN	Piperidolate hydrochloride [129-77-1]; Down 200; 11.2uM; HL60; HT_HG-U133A	0.001378	1	0.0432	0.4481	9	195	ATP6V1C1,RNGTT,ZNF155,MDM2,PLAA,TWSG1,CUL2,HIPK3,PPP2R1B
Drug	5330_DN	Rolipram [61413-54-5]; Down 200; 14.6uM; MCF7; HT_HG-U133A	0.001378	1	0.0432	0.4481	9	195	ATP6V1C1,RIOK3,SOCS6,PHKB,KLHL7,NFYA,PPP2R1B,RNF6,HERC4
Drug	2918_DN	Sotalol hydrochloride [959-24-0]; Down 200; 13uM; HL60; HT_HG-U133A	0.001378	1	0.0432	0.4481	9	195	MON2,RXYLT1,TTC26,RINT1,WDR48,SEL1L,TRAPPC11,VPS8,ZNF10
Drug	7509_DN	16-phenyl tetranor Prostaglandin E2; Down 200; 10uM; PC3; HT_HG-U133A	0.001378	1	0.0432	0.4481	9	195	DDX3X,DHX15,NFYA,HSPA4,CUL2,SGCB,MSH6,PCMTD2,RP2
Drug	1968_DN	Minaprine dihydrochloride [25953-17-7]; Down 200; 10.8uM; HL60; HG-U133A	0.001378	1	0.0432	0.4481	9	195	APH1B,DDX3X,KLHL9,OPA1,MSH6,PPP2R1B,HS2ST1,SEC23IP,DOP1A
Drug	6959_DN	wortmannin from Penicillium funiculosum; Down 200; 0.01uM; MCF7; HT_HG-U133A	0.001378	1	0.0432	0.4481	9	195	RNGTT,ARMC8,CPSF6,NUP98,YTHDC2,TRIM23,MSH6,SEC23IP,IRAK4
Drug	4333_DN	PHA-00851261E [724719-49-7]; Down 200; 1uM; PC3; HT_HG-U133A	0.001378	1	0.0432	0.4481	9	195	ATP6V1C1,RNGTT,ZNF155,GDAP1,DDX3X,MBTPS2,SEC23A,CLIC4,RNF6
Drug	4660_DN	Guanfacine hydrochloride [29110-48-3]; Down 200; 14.2uM; PC3; HT_HG-U133A	0.001378	1	0.0432	0.4481	9	195	SOCS6,PTBP3,NUDT21,CANX,PHTF2,ZNF10,ATP2C1,NNT,HERC4
Drug	1927_UP	Verapamyl hydrochloride [152-11-4]; Up 200; 8.2uM; PC3; HG-U133A	0.001378	1	0.0432	0.4481	9	195	CCP110,RNGTT,RIOK3,SOCS6,ZNF468,SEL1L,CUL2,HS2ST1,RP2
Drug	1831_UP	Adiphenine hydrochloride [50-42-0]; Up 200; 11.4uM; PC3; HT_HG-U133A	0.001378	1	0.0432	0.4481	9	195	RXYLT1,SOCS6,ZNF468,MED23,S100PBP,CREBL2,BBS10,TMEM267,TMEM184C
Drug	2156_DN	Dydrogesterone [152-62-5]; Down 200; 12.8uM; HL60; HT_HG-U133A	0.001378	1	0.0432	0.4481	9	195	BACH1,ABITRAM,MBTPS2,NFYA,ZNF254,TRIM23,ZNF10,RNF6,PTCD2
Drug	2240_DN	Acenocoumarol [152-72-7]; Down 200; 11.4uM; MCF7; HT_HG-U133A	0.001378	1	0.0432	0.4481	9	195	PIGN,ERCC6,RNGTT,ZNF614,PTBP3,PHTF2,YTHDC2,FASTKD2,CSE1L
Drug	1743_DN	Methoxy-6-harmalan [3589-73-9]; Down 200; 18.6uM; HL60; HG-U133A	0.001378	1	0.0432	0.4481	9	195	ERCC6,SLC35D1,SPIN1,ZNF468,PPP2R1B,ATP2C1,HS2ST1,RP2,ZW10
Drug	3840_DN	Bendroflumethiazide [73-48-3]; Down 200; 9.4uM; MCF7; HT_HG-U133A	0.001378	1	0.0432	0.4481	9	195	KLHL24,ATP6V1C1,SNX13,NXPE3,MFAP3,PHTF2,ZDHHC17,SF3B1,STK38L
Drug	7554_UP	ST021200; Up 200; 10uM; MCF7; HT_HG-U133A	0.001378	1	0.0432	0.4481	9	195	SEC23A,FBXO34,METTL4,PPP2R1B,TMEM267,HS2ST1,PTCD2,PCMTD2,NNT
Drug	3246_UP	Lactobionic acid [96-82-2]; Up 200; 11.2uM; MCF7; HT_HG-U133A	0.001378	1	0.0432	0.4481	9	195	KLHL24,MDM2,MFAP3,CUL2,VPS8,PHTF2,ZBTB1,ZNF10,NNT
Drug	3524_DN	Netilmicin sulfate [56931-57-2]; Down 200; 2.8uM; MCF7; HT_HG-U133A	0.001428	1	0.0432	0.4481	9	196	KLHL24,ERCC6,RNGTT,SOCS6,ZNF614,C12orf4,RNF6,AKAP10,HERC4
Drug	987_DN	Rapamycin; Down 200; 0.1uM; MCF7; HT_HG-U133A_EA	0.001428	1	0.0432	0.4481	9	196	MDM2,LDAH,POLR1B,HSPA4,CUL2,PTBP3,C18orf25,RP2,HERC4
Drug	3453_DN	Sulfameter [651-06-9]; Down 200; 14.2uM; MCF7; HT_HG-U133A	0.001428	1	0.0432	0.4481	9	196	CLASP2,MDM2,ADAM10,FBXO38,MFAP3,PIGA,PTBP3,PAPOLG,MTM1
Drug	5425_DN	Ranitidine hydrochloride [66357-59-3]; Down 200; 11.4uM; MCF7; HT_HG-U133A	0.001428	1	0.0432	0.4481	9	196	KLHL24,ATP6V1C1,RNGTT,ADAM10,NFYA,ZNF614,CUL4B,PPP2R1B,PPP2R5C
Drug	3705_DN	Medrysone [2668-66-8]; Down 200; 11.6uM; PC3; HT_HG-U133A	0.001428	1	0.0432	0.4481	9	196	APH1B,ATP6V1C1,PLAA,SEC23A,ZNF254,ELP1,IKZF5,ZW10,HERC4
Drug	6058_DN	Gossypol [303-45-7]; Down 200; 7.8uM; MCF7; HT_HG-U133A	0.001428	1	0.0432	0.4481	9	196	RNGTT,ADAM10,LDAH,MFAP3,ARMC8,YTHDC2,PPP2R1B,PCNX4,RP2
Drug	6950_UP	rosiglitazone; Up 200; 10uM; MCF7; HT_HG-U133A	0.001428	1	0.0432	0.4481	9	196	ZSCAN12,ERCC6,MDM2,PLAA,NFYA,CUL4B,YTHDC2,ZNF10,RNF6
Drug	3309_UP	Ceforanide [60925-61-3]; Up 200; 7.6uM; MCF7; HT_HG-U133A	0.001428	1	0.0432	0.4481	9	196	ATP6V1C1,SNX13,ZNF614,CUL2,RCHY1,PAPOLG,ZNF10,PDE12,TTC30A
Drug	4148_DN	Cefsulodin sodium salt [52152-93-9]; Down 200; 7.2uM; MCF7; HT_HG-U133A	0.001428	1	0.0432	0.4481	9	196	SLC35D1,FBXO38,NFYA,ATL2,YTHDC2,HIPK3,RNF6,ZW10,HERC4
Drug	4812_DN	Theophylline monohydrate [5967-84-0]; Down 200; 20.2uM; MCF7; HT_HG-U133A	0.001428	1	0.0432	0.4481	9	196	ZSCAN12,SEC24A,PTK2,SEC23A,UBR2,CPSF6,PHTF2,TTC30A,NNT
Drug	2058_UP	Nicergoline; Up 200; 8.2uM; PC3; HT_HG-U133A	0.001428	1	0.0432	0.4481	9	196	SOCS6,FBXO38,MBTPS2,ARMC8,SEL1L,RBL2,IKZF5,ZNF84,ZW10
Drug	5521_DN	Telenzepine dihydrochloride [147416-96-4]; Down 200; 9uM; MCF7; HT_HG-U133A	0.001428	1	0.0432	0.4481	9	196	RNGTT,PTBP3,NEMP1,ELP1,ZDHHC17,C1orf115,PCNX4,PTCD2,HERC4
Drug	2046_UP	Lisuride (S)(-) [18016-80-3]; Up 200; 11.8uM; HL60; HG-U133A	0.001428	1	0.0432	0.4481	9	196	ZC3H14,ERCC6,SEC24A,RIOK3,DDX3X,ECT2,TMEM267,MTM1,RP2
Drug	3452_DN	Methacholine chloride [62-51-1]; Down 200; 20.4uM; MCF7; HT_HG-U133A	0.001428	1	0.0432	0.4481	9	196	MFAP3,PLAA,NFYA,TWSG1,PTBP3,C12orf4,CANX,HS2ST1,AKAP10
Drug	4162_DN	Tobramycin [32986-56-4]; Down 200; 8.6uM; MCF7; HT_HG-U133A	0.001428	1	0.0432	0.4481	9	196	ATP6V1C1,RNGTT,MDM2,DDX3X,SNX13,SLC35D1,FASTKD2,SEC23IP,HERC4
Drug	1425_DN	Ornidazole [16773-42-5]; Down 200; 18.2uM; HL60; HG-U133A	0.001428	1	0.0432	0.4481	9	196	RIOK3,ADAM10,WDR48,CPSF6,NUP98,CLIC4,ATF2,ATP2C1,TMEM267
Drug	1558_DN	Cinnarizine [298-57-7]; Down 200; 10.8uM; HL60; HG-U133A	0.001428	1	0.0432	0.4481	9	196	ZC3H14,KLHL24,ADAM10,HSPA4,WDR48,TRAPPC11,RBL2,ECT2,HS2ST1
Drug	6777_DN	Yohimbine hydrochloride [65-19-0]; Down 200; 10.2uM; MCF7; HT_HG-U133A	0.001428	1	0.0432	0.4481	9	196	MON2,ZNF813,FRS2,MDM2,KLHL7,NFYA,WDR48,RNF6,HERC4
Drug	2630_DN	Bezafibrate [41859-67-0]; Down 200; 11uM; MCF7; HT_HG-U133A	0.001428	1	0.0432	0.4481	9	196	FBXO38,PHKB,SEL1L,ATG5,CUL4B,PAPOLG,TARDBP,ZNF20,RNF6
Drug	5078_DN	Dapsone [80-08-0]; Down 200; 16.2uM; PC3; HT_HG-U133A	0.001428	1	0.0432	0.4481	9	196	KLHL24,RNGTT,GDAP1,PHKB,ARMC8,PTBP3,ZBTB1,ATP2C1,ZNF83
Drug	2390_DN	Glutethimide, para-amino [125-84-8]; Down 200; 17.2uM; HL60; HT_HG-U133A	0.001428	1	0.0432	0.4481	9	196	KLHL9,SPIN1,NFYA,HSPA4,ZNF614,FOXN2,PHTF2,PPP2R1B,RBM12
Drug	5007_UP	Methoxy-8-psoralen [298-81-7]; Up 200; 18.6uM; MCF7; HT_HG-U133A	0.001428	1	0.0432	0.4481	9	196	MDM2,SNX13,PTBP3,CANX,PHTF2,ZDHHC17,HIPK3,PPP2R1B,RNF6
Drug	1113_DN	doxycycline; Down 200; 14.4uM; MCF7; HT_HG-U133A_EA	0.001428	1	0.0432	0.4481	9	196	PEX13,RIOK3,RINT1,MKLN1,RBL2,ATF2,TMEM267,RNF6,ZNF654
Drug	1604_UP	Clorgyline hydrochloride [17780-75-5]; Up 200; 13uM; HL60; HG-U133A	0.001428	1	0.0432	0.4481	9	196	FEM1C,KLHL7,LAMP2,THADA,ATP2C1,MTM1,NNT,PRRC1,RAB33B
Drug	5071_DN	Niflumic acid [4394-00-7]; Down 200; 14.2uM; PC3; HT_HG-U133A	0.001428	1	0.0432	0.4481	9	196	MON2,SOCS6,ZNF614,PTBP3,ZNF254,TRIM23,RNF6,IRAK4,NNT
Drug	1990_UP	Diflunisal [22494-42-4]; Up 200; 16uM; HL60; HG-U133A	0.001428	1	0.0432	0.4481	9	196	PIGN,ADAM10,FBXO38,PLAA,KPNA1,WDR48,ECT2,ATP2C1,PCMTD2
Drug	5028_UP	Lisuride (S)(-) [18016-80-3]; Up 200; 11.8uM; MCF7; HT_HG-U133A	0.001428	1	0.0432	0.4481	9	196	PLAA,ZNF614,WDR48,RCHY1,YTHDC2,ZBTB1,HIPK3,PPP2R1B,RNF6
Drug	2036_DN	Baclofen (R,S) [1134-47-0]; Down 200; 18.8uM; HL60; HG-U133A	0.001428	1	0.0432	0.4481	9	196	DDX3X,DHX15,DLD,CANX,PHTF2,LRPPRC,USO1,SAR1B,NNT
Drug	3204_DN	Practolol [6673-35-4]; Down 200; 15uM; MCF7; HT_HG-U133A	0.001428	1	0.0432	0.4481	9	196	FRS2,SNX13,FBXO38,MBTPS2,SEL1L,PTBP3,ATF2,TRIM23,RNF6
Drug	144_UP	chlorpropamide; Up 200; 100uM; MCF7; HG-U133A	0.001428	1	0.0432	0.4481	9	196	LDAH,MKLN1,SEC23A,WDR48,VPS8,PHTF2,RANBP6,SEC23IP,STK38L
Drug	6570_UP	Gly-His-Lys acetate salt; Up 200; 1uM; PC3; HT_HG-U133A	0.001428	1	0.0432	0.4481	9	196	ADAM10,SEC23A,ATG5,NUDT21,NUP98,NMD3,MSH6,HERC4,ZNF654
Drug	4120_DN	Ethambutol dihydrochloride [1070-11-7]; Down 200; 14.4uM; MCF7; HT_HG-U133A	0.001428	1	0.0432	0.4481	9	196	MDM2,SNX13,PLAA,MBTPS2,NFYA,PTBP3,CPSF6,RNF6,IRAK4
Drug	1708_UP	Diphenhydramine hydrochloride [147-24-0]; Up 200; 13.8uM; MCF7; HT_HG-U133A	0.001428	1	0.0432	0.4481	9	196	KLHL24,ZNF268,NFYA,ATL2,PTBP3,YTHDC2,PPP2R5C,PDE12,RAB33B
Drug	1959_DN	Paclitaxel [33069-62-4]; Down 200; 4.6uM; PC3; HG-U133A	0.001428	1	0.0432	0.4481	9	196	ATP6V1C1,GIN1,RIOK3,RINT1,KLHL7,MED23,SEC23A,PHTF2,ATP2C1
Drug	2493_DN	Sisomicin sulfate [53179-09-2]; Down 200; 2.8uM; HL60; HT_HG-U133A	0.001428	1	0.0432	0.4481	9	196	RNGTT,BACH1,FBXO38,ARMC8,SEL1L,FOXN2,MCPH1,PHTF2,HIPK3
Drug	1586_UP	Alfuzosin hydrochloride [81403-68-1]; Up 200; 9.4uM; HL60; HG-U133A	0.001428	1	0.0432	0.4481	9	196	RIOK3,PTK2,KLHL7,WDR48,TRAPPC11,RBL2,ATP2C1,HS2ST1,RP2
Drug	4815_DN	Cetirizine dihydrochloride [83881-52-1]; Down 200; 8.6uM; MCF7; HT_HG-U133A	0.001428	1	0.0432	0.4481	9	196	LDAH,DDX3X,HSPA4,SEC23A,OPA1,MSH6,CSE1L,RP2,NNT
Drug	1432_DN	Chlorphensin carbamate [886-74-8]; Down 200; 16.2uM; HL60; HG-U133A	0.001428	1	0.0432	0.4481	9	196	RIOK3,PLAA,AP1G1,SPIN1,NFYA,TRAPPC11,ECT2,HS2ST1,RP2
Drug	1909_DN	Amyleine hydrochloride [532-59-2]; Down 200; 14.8uM; PC3; HG-U133A	0.001428	1	0.0432	0.4481	9	196	ZC3H14,SEC24A,CLASP2,KLHL7,NUP98,C1orf115,GORASP2,PPP2R5C,PCNX4
Drug	6707_DN	Propofol [2078-54-8]; Down 200; 22.4uM; PC3; HT_HG-U133A	0.001428	1	0.0432	0.4481	9	196	RNGTT,NCBP1,MFAP3,PTBP3,CANX,PHTF2,ZDHHC17,IRAK4,NNT
Drug	2128_DN	Meclofenamic acid sodium salt monohydrate [6385-02-0]; Down 200; 11.8uM; PC3; HT_HG-U133A	0.001479	1	0.0432	0.4481	9	197	ADAM10,DDX3X,MBTPS2,HSPA4,PTBP3,ZDHHC17,PPP2R5C,SF3B1,IRAK4
Drug	3561_DN	Ciprofibrate [52214-84-3]; Down 200; 13.8uM; MCF7; HT_HG-U133A	0.001479	1	0.0432	0.4481	9	197	DDX3X,NFYA,HSPA4,ZDHHC17,ATF2,TRIM23,MSH6,ZNF20,HERC4
Drug	3838_DN	Furaltadone hydrochloride [3759-92-0]; Down 200; 11uM; MCF7; HT_HG-U133A	0.001479	1	0.0432	0.4481	9	197	ATP6V1C1,SOCS6,SLC35D1,NFYA,TRIM23,ZNF10,SF3B1,RNF6,NNT
Drug	1826_UP	Thiamphenicol [15318-45-3]; Up 200; 11.2uM; PC3; HT_HG-U133A	0.001479	1	0.0432	0.4481	9	197	ATP6V1C1,MATR3,SOCS6,GFPT1,DDX3X,NXPE3,TWSG1,RBL2,NUP98
Drug	4714_DN	PNU-0251126 [267429-19-6]; Down 200; 1uM; MCF7; HT_HG-U133A	0.001479	1	0.0432	0.4481	9	197	FRS2,SOCS6,FEM1C,MDM2,ADAM10,DDX3X,MFAP3,C21orf91,RNF6
Drug	6145_DN	Oxprenolol hydrochloride [6452-73-9]; Down 200; 13.2uM; HL60; HT_HG-U133A	0.001479	1	0.0432	0.4481	9	197	TTC26,PLAA,WDR48,ZNF254,YTHDC2,C21orf91,PPP2R1B,RBM12,IRAK4
Drug	415_UP	nordihydroguaiaretic acid; Up 200; 1uM; ssMCF7; HG-U133A	0.001479	1	0.0432	0.4481	9	197	RNGTT,FRS2,RIOK3,DDX3X,SEC23A,PTBP3,RBL2,USO1,SEC23IP
Drug	7386_DN	Glycopyrrolate [596-51-0]; Down 200; 10uM; PC3; HT_HG-U133A	0.001479	1	0.0432	0.4481	9	197	ZSCAN12,ADAM10,PTBP3,ZDHHC17,TRIM23,ATP2C1,HS2ST1,ZNF84,NNT
Drug	2329_DN	Dantrolene sodium salt [14663-23-1]; Down 200; 11.8uM; MCF7; HT_HG-U133A	0.001479	1	0.0432	0.4481	9	197	ZSCAN12,RNGTT,FRS2,RBL2,ZNF254,YTHDC2,TRIM23,TTC30A,STK38L
Drug	6957_DN	estradiol, USP; Down 200; 0.01uM; MCF7; HT_HG-U133A	0.001479	1	0.0432	0.4481	9	197	KLHL24,FBXO38,NFYA,WDR48,PTBP3,TRIM23,C1orf115,MTM1,IRAK4
Drug	2110_UP	Alverine citrate salt [5560-59-8]; Up 200; 8.4uM; PC3; HT_HG-U133A	0.001479	1	0.0432	0.4481	9	197	FRS2,CLASP2,MDM2,FBXO38,SPIN1,HSPA4,SEL1L,SGCB,PTCD2
Drug	1800_UP	Allantoin [97-59-6]; Up 200; 25.2uM; PC3; HT_HG-U133A	0.001479	1	0.0432	0.4481	9	197	RNGTT,KLHL9,ABITRAM,MBTPS2,NFYA,IKZF5,PPP2R5C,RBM12,NNT
Drug	5320_DN	Paclitaxel [33069-62-4]; Down 200; 4.6uM; MCF7; HT_HG-U133A	0.001479	1	0.0432	0.4481	9	197	TTC26,KLHL9,NFYA,TRIM23,SEC23IP,PTCD2,RP2,NNT,HCCS
Drug	ctd:C031389	resorcinol	0.001479	1	0.0432	0.4481	9	197	GIN1,ARRDC3,ZNF529,IKZF5,ZNF20,SEPSECS,RBM12,RLIM,GPCPD1
Drug	5331_DN	Rolitetracycline [751-97-3]; Down 200; 7.6uM; MCF7; HT_HG-U133A	0.001479	1	0.0432	0.4481	9	197	MDM2,GFPT1,KLHL9,SEC23A,OPA1,RNF6,MTM1,TMEM184C,RAB33B
Drug	2871_DN	Propafenone hydrochloride [34183-22-7]; Down 200; 10.6uM; MCF7; HT_HG-U133A	0.001479	1	0.0432	0.4481	9	197	SNX13,SLC35D1,RCHY1,SGCB,TRIM23,BBS10,HIPK3,TTC30A,DOP1A
Drug	1930_DN	Zimelidine dihydrochloride monohydrate [61129-30-4]; Down 200; 9.8uM; PC3; HG-U133A	0.001479	1	0.0432	0.4481	9	197	KLHL7,SEC23A,PHTF2,STAM,ECT2,PPP2R1B,RPRD1A,USO1,PCNX4
Drug	5066_DN	Diethylcarbamazine citrate [1642-54-2]; Down 200; 10.2uM; PC3; HT_HG-U133A	0.001479	1	0.0432	0.4481	9	197	MDM2,FBXO38,SEL1L,PTBP3,CANX,PHTF2,FOXJ3,IKZF5,RNF6
Drug	2932_DN	Zalcitabine [7481-89-2]; Down 200; 19uM; HL60; HT_HG-U133A	0.001479	1	0.0432	0.4481	9	197	RXYLT1,SOCS6,DCAF17,ATL2,RCHY1,PHTF2,IKZF5,HIPK3,PCNX4
Drug	1871_UP	Diphenhydramine hydrochloride [147-24-0]; Up 200; 13.8uM; HL60; HT_HG-U133A	0.001479	1	0.0432	0.4481	9	197	SOCS6,KLHL9,HSPA4,CUL2,MCPH1,NUP98,PAPOLG,HIPK3,ZW10
Drug	6692_DN	Chlorprothixene hydrochloride [6469-93-8]; Down 200; 11.4uM; PC3; HT_HG-U133A	0.001479	1	0.0432	0.4481	9	197	RXYLT1,CUL2,YTHDC2,FASTKD2,ZBTB1,OPA1,IKZF5,PPP2R5C,TMEM168
Drug	7440_UP	Bumetanide [28395-03-1]; Up 200; 11uM; MCF7; HT_HG-U133A	0.001479	1	0.0432	0.4481	9	197	RNGTT,MDM2,DCAF17,CUL2,NEMP1,YTHDC2,ZBTB1,HIPK3,RP2
Drug	1109_UP	3-hydroxy-(D/L)-kynurenine; Up 200; 9.2uM; MCF7; HT_HG-U133A_EA	0.001479	1	0.0432	0.4481	9	197	APH1B,PTK2,SLC35D1,FOXJ3,WDR47,PPP2R1B,PCNX4,ZNF83,NNT
Drug	1678_UP	Allantoin [97-59-6]; Up 200; 25.2uM; MCF7; HT_HG-U133A	0.001479	1	0.0432	0.4481	9	197	ZSCAN12,ERCC6,MDM2,SLC35D1,MBTPS2,CUL2,CANX,ZNF10,PPP2R1B
Drug	3797_DN	Homosalate [118-56-9]; Down 200; 15.2uM; PC3; HT_HG-U133A	0.001479	1	0.0432	0.4481	9	197	RNGTT,PTBP3,ZBTB33,CANX,PHTF2,ATF2,PDE12,SEC23IP,NNT
Drug	6125_DN	Leucomisine [17946-87-1]; Down 200; 16.2uM; HL60; HT_HG-U133A	0.001479	1	0.0432	0.4481	9	197	RNGTT,BACH1,TTC26,SNX13,DCAF17,PTBP3,PHTF2,TRIM23,ZNF10
Drug	2638_DN	Mimosine [500-44-7]; Down 200; 20.2uM; MCF7; HT_HG-U133A	0.001479	1	0.0432	0.4481	9	197	KLHL24,CLASP2,DDX3X,FBXO38,PLAA,NFYA,ATL2,ZNF254,TMEM184C
Drug	1401_UP	Tranexamic acid [1197-18-8]; Up 200; 25.4uM; HL60; HG-U133A	0.001479	1	0.0432	0.4481	9	197	KLHL7,PTBP3,YTHDC2,LAMP2,ECT2,RPRD1A,TMEM267,HS2ST1,MTM1
Drug	1282_UP	Buspirone hydrochloride [33386-08-2]; Up 200; 9.4uM; HL60; HT_HG-U133A	0.001479	1	0.0432	0.4481	9	197	ATP6V1C1,RNGTT,MDM2,GFPT1,PTK2,DDX3X,MBTPS2,SEC23A,CSE1L
Drug	4829_DN	Oxethazaine [126-27-2]; Down 200; 8.6uM; MCF7; HT_HG-U133A	0.001479	1	0.0432	0.4481	9	197	LDAH,DDX3X,PHKB,SEC23A,PTBP3,PPP2R1B,ZNF20,ZW10,NNT
Drug	7150_DN	(+,-)-Synephrine [94-07-5]; Down 200; 24uM; PC3; HT_HG-U133A	0.001479	1	0.0432	0.4481	9	197	NXPE3,MKLN1,PTBP3,DCP2,PHTF2,PAPOLG,C1orf115,NNT,DOP1A
Drug	1279_DN	Guanfacine hydrochloride [29110-48-3]; Down 200; 14.2uM; HL60; HT_HG-U133A	0.001479	1	0.0432	0.4481	9	197	RNGTT,SEC24A,SOCS6,DDX3X,SEC23A,CANX,CLIC4,YTHDC2,ATF2
Drug	7180_UP	Meropenem [96036-03-2]; Up 200; 10.4uM; MCF7; HT_HG-U133A	0.001479	1	0.0432	0.4481	9	197	KLHL24,CLASP2,PTBP3,RCHY1,ZDHHC17,IKZF5,MSH6,CSE1L,RNF6
Drug	7552_UP	9-deoxy-9-methylene-16,16-dimethyl Prostaglandin E2; Up 200; 10uM; MCF7; HT_HG-U133A	0.001479	1	0.0432	0.4481	9	197	PEX13,TMEM41B,FBXO34,WDR48,METTL4,CSE1L,HS2ST1,PCMTD2,NNT
Drug	3685_DN	Mephentermine hemisulfate [1212-72-2]; Down 200; 9.4uM; PC3; HT_HG-U133A	0.001479	1	0.0432	0.4481	9	197	APH1B,SOCS6,NFYA,SEC23A,SEL1L,ATF2,TRIM23,ZNF10,MSH6
Drug	3444_DN	Ribostamycin sulfate salt [53797-35-6]; Down 200; 7.2uM; MCF7; HT_HG-U133A	0.001479	1	0.0432	0.4481	9	197	ZC3H14,ATP6V1C1,RNGTT,CANX,PHTF2,FOXJ3,ATF2,MTM1,NNT
Drug	834_DN	5211181; Down 200; 12uM; MCF7; HT_HG-U133A_EA	0.001479	1	0.0432	0.4481	9	197	PIGN,RNGTT,ZNF813,MDM2,FBXO38,ZDHHC17,C21orf91,CSE1L,ZNF84
Drug	2635_DN	Ritodrine hydrochloride [23239-51-2]; Down 200; 12.4uM; MCF7; HT_HG-U133A	0.001479	1	0.0432	0.4481	9	197	CLASP2,PHKB,ARMC8,NEMP1,TRIM23,PPP2R1B,RNF6,MTM1,RP2
Drug	7419_UP	Telenzepine dihydrochloride [147416-96-4]; Up 200; 9uM; MCF7; HT_HG-U133A	0.001479	1	0.0432	0.4481	9	197	RNGTT,MDM2,MBTPS2,NFYA,ZNF614,WDR48,CUL4B,YTHDC2,HERC4
Drug	7026_DN	Enalapril maleate [76095-16-4]; Down 200; 8.2uM; MCF7; HT_HG-U133A	0.001479	1	0.0432	0.4481	9	197	SLC35D1,EFEMP1,POLR1B,ARMC8,WDR48,ATG5,TRIM23,ATP2C1,HERC4
Drug	4800_UP	Minoxidil [38304-91-5]; Up 200; 19.2uM; MCF7; HT_HG-U133A	0.001479	1	0.0432	0.4481	9	197	PIGN,SOCS6,MDM2,ADAM10,HSPA4,PTBP3,TRIM23,MTM1,HERC4
Drug	7352_DN	Zalcitabine [7481-89-2]; Down 200; 19uM; MCF7; HT_HG-U133A	0.001479	1	0.0432	0.4481	9	197	ATP6V1C1,CLASP2,MFAP3,PLAA,RCHY1,NUP98,ZDHHC17,SEC23IP,ZNF654
Drug	3935_DN	Eucatropine hydrochloride [536-93-6]; Down 200; 12.2uM; MCF7; HT_HG-U133A	0.001479	1	0.0432	0.4481	9	197	MDM2,DDX3X,MBTPS2,PTBP3,ZBTB33,RCHY1,PHTF2,ATF2,HERC4
Drug	2733_DN	Methazolamide [554-57-4]; Down 200; 17uM; HL60; HT_HG-U133A	0.001479	1	0.0432	0.4481	9	197	RNGTT,MBTPS2,CUL2,PTBP3,FASTKD2,CREBL2,IKZF5,C21orf91,C18orf25
Drug	CID000123910	Kdel Sequence	0.001493	1	0.0432	0.4481	5	62	COPB2,COPB1,CANX,ELP1,ARCN1
Drug	1404_DN	Ranitidine hydrochloride [66357-59-3]; Down 200; 11.4uM; HL60; HG-U133A	0.001531	1	0.0432	0.4481	9	198	ADAM10,GFPT1,NFYA,PTBP3,NUP98,ATF2,MSH6,THADA,DOP1A
Drug	762_UP	alpha-estradiol; Up 200; 0.01uM; MCF7; HG-U133A	0.001531	1	0.0432	0.4481	9	198	ZC3H14,SEC24A,SOCS6,FBXO38,MKLN1,MED23,KPNA1,THADA,NNT
Drug	5110_DN	Aztreonam [78110-38-0]; Down 200; 9.2uM; PC3; HT_HG-U133A	0.001531	1	0.0432	0.4481	9	198	RNGTT,SOCS6,DDX3X,SNX13,MBTPS2,DCAF17,ARMC8,SEL1L,SF3B1
Drug	842_DN	N6,2-O-dibutyryladenosine 3,5-cyclic monophosphate sodium salt; Down 200; 2uM; MCF7; HT_HG-U133A_EA	0.001531	1	0.0432	0.4481	9	198	PIGN,ZNF813,SOCS6,SLC35D1,POLR1B,WDR48,TRAPPC11,YTHDC2,CSE1L
Drug	5678_DN	Thonzonium bromide [553-08-2]; Down 200; 6.8uM; MCF7; HT_HG-U133A	0.001531	1	0.0432	0.4481	9	198	RNGTT,NCBP1,ADAM10,SNX13,NFYA,PHTF2,ZBTB1,MTM1,HCCS
Drug	1761_DN	Syrosingopine [84-36-6]; Down 200; 6uM; HL60; HG-U133A	0.001531	1	0.0432	0.4481	9	198	CCP110,DHX15,KPNA1,COPB1,DCP2,PPP2R1B,SF3B1,TMEM267,STK38L
Drug	5117_UP	Bumetanide [28395-03-1]; Up 200; 11uM; PC3; HT_HG-U133A	0.001531	1	0.0432	0.4481	9	198	ZNF268,DDX3X,SNX13,FBXO38,MBTPS2,NUDT21,CLIC4,ZBTB1,RNF6
Drug	6909_UP	SB 202190; Up 200; 1uM; MCF7; HT_HG-U133A	0.001531	1	0.0432	0.4481	9	198	BACH1,CLASP2,RXYLT1,SEL1L,CUL2,TRAPPC11,C18orf25,MTM1,NNT
Drug	4694_DN	Mebendazole [31431-39-7]; Down 200; 13.6uM; MCF7; HT_HG-U133A	0.001531	1	0.0432	0.4481	9	198	CLASP2,NFYA,ARMC8,CUL4B,C18orf25,RBM12,CSE1L,TMEM184C,RP2
Drug	2463_DN	Isoquinoline, 6,7-dimethoxy-1-methyl-1,2,3,4-tetrahydro, hydrochloride; Down 200; 16.4uM; HL60; HT_HG-U133A	0.001531	1	0.0432	0.4481	9	198	BACH1,NFYA,ZNF614,PTBP3,SGCB,PHTF2,TRIM23,HIPK3,CSE1L
Drug	4964_DN	Tracazolate hydrochloride [41094-88-6]; Down 200; 11.8uM; MCF7; HT_HG-U133A	0.001531	1	0.0432	0.4481	9	198	ATP6V1C1,RNGTT,FRS2,DDX3X,SEL1L,ATG5,ZDHHC17,PAPOLG,RNF6
Drug	1594_UP	Chlorpropamide [94-20-2]; Up 200; 14.4uM; HL60; HG-U133A	0.001531	1	0.0432	0.4481	9	198	TSN,PTBP3,NEMP1,PPP2R1B,TMEM267,SEC23IP,RP2,NNT,PRRC1
Drug	6287_DN	Verapamyl hydrochloride [152-11-4]; Down 200; 8.2uM; PC3; HT_HG-U133A	0.001531	1	0.0432	0.4481	9	198	SEC24A,NFYA,NEMP1,ZNF254,NUP98,METTL4,CREBL2,TRIM23,PDE12
Drug	1595_UP	Zidovudine, AZT [30516-87-1]; Up 200; 15uM; HL60; HG-U133A	0.001531	1	0.0432	0.4481	9	198	BACH1,TSN,LDAH,ZNF468,ATG5,TRAPPC11,NUDT21,ATP2C1,RP2
Drug	2483_DN	Cefaclor [70356-03-5]; Down 200; 10.4uM; HL60; HT_HG-U133A	0.001531	1	0.0432	0.4481	9	198	ATP6V1C1,BACH1,PTK2,MFAP3,NFYA,TRAPPC11,SGCB,HIPK3,C21orf91
Drug	1378_UP	Nomifensine maleate [32795-47-4]; Up 200; 11.2uM; HL60; HG-U133A	0.001531	1	0.0432	0.4481	9	198	ATP6V1C1,BACH1,PTK2,DDX3X,AP1G1,WDR48,PTBP3,HS2ST1,DPY19L4
Drug	7322_UP	Pronethalol hydrochloride [51-02-5]; Up 200; 15uM; MCF7; HT_HG-U133A	0.001531	1	0.0432	0.4481	9	198	ATP6V1C1,NCBP1,ZBTB33,RBL2,ELP1,ZNF20,TTC30A,RP2,HERC4
Drug	3421_DN	Ethoxyquin [91-53-2]; Down 200; 18.4uM; MCF7; HT_HG-U133A	0.001531	1	0.0432	0.4481	9	198	FEM1C,MDM2,MFAP3,EFEMP1,NFYA,ATF2,ZNF20,ZNF83,NNT
Drug	1806_UP	Homatropine hydrobromide (R,S) [51-56-9]; Up 200; 11.2uM; PC3; HT_HG-U133A	0.001531	1	0.0432	0.4481	9	198	DDX3X,KLHL9,MBTPS2,MKLN1,HSPA4,RBL2,ZNF254,CLIC4,NNT
Drug	1838_DN	Procaine hydrochloride [51-05-8]; Down 200; 14.6uM; HL60; HT_HG-U133A	0.001531	1	0.0432	0.4481	9	198	DDX3X,PTBP3,RCHY1,YTHDC2,BBS10,HIPK3,ZNF10,C21orf91,SEC23IP
Drug	1975_UP	Ticlopidine hydrochloride [53885-35-1]; Up 200; 13.4uM; HL60; HG-U133A	0.001531	1	0.0432	0.4481	9	198	MON2,EPS15,RNGTT,DHX15,TMEM41B,HSPBAP1,ECT2,PPP2R1B,PPP2R5C
Drug	7399_DN	Methotrimeprazine maleat salt [7104-38-3]; Down 200; 9uM; PC3; HT_HG-U133A	0.001531	1	0.0432	0.4481	9	198	ATP6V1C1,RNGTT,MBTPS2,RCHY1,PHTF2,TRIM23,ZNF10,RNF6,HERC4
Drug	4216_DN	Minoxidil [38304-91-5]; Down 200; 19.2uM; PC3; HT_HG-U133A	0.001531	1	0.0432	0.4481	9	198	RNGTT,GDAP1,MBTPS2,PTBP3,FOXJ3,TRIM23,IKZF5,ZNF10,HERC4
Drug	5420_DN	Hexetidine [141-94-6]; Down 200; 11.8uM; MCF7; HT_HG-U133A	0.001531	1	0.0432	0.4481	9	198	ZSCAN12,RNGTT,PHTF2,YTHDC2,MSH6,CSE1L,RNF6,IRAK4,AKAP10
Drug	5856_DN	Milrinone [78415-72-2]; Down 200; 19uM; PC3; HT_HG-U133A	0.001585	1	0.0432	0.4481	9	199	APH1B,ZSCAN12,NXPE3,DCAF17,TWSG1,NUDT21,ZNF20,THADA,AKAP10
Drug	5844_DN	Folic acid [59-30-3]; Down 200; 9uM; PC3; HT_HG-U133A	0.001585	1	0.0432	0.4481	9	199	KLHL24,CLASP2,NFYA,FOXJ3,TRIM23,ZNF20,PDE12,CSE1L,PTCD2
Drug	1782_DN	Racecadotril [81110-73-8]; Down 200; 10.4uM; HL60; HG-U133A	0.001585	1	0.0432	0.4481	9	199	KLHL24,PIK3R4,NFYA,KPNA1,WDR48,UBR2,NEMP1,ATP2C1,NNT
Drug	4568_DN	Sparteine (-) [90-39-1]; Down 200; 17uM; PC3; HT_HG-U133A	0.001585	1	0.0432	0.4481	9	199	ATP6V1C1,PEX13,EFEMP1,PHTF2,ZDHHC17,TRIM23,MTM1,ZW10,RAB33B
Drug	1440_DN	Metampicillin sodium salt [6489-61-8]; Down 200; 10.4uM; HL60; HG-U133A	0.001585	1	0.0432	0.4481	9	199	EPS15,RNGTT,ADAM10,LDAH,FBXO38,AP1G1,SPIN1,MKLN1,RNF6
Drug	2633_DN	Tacrine hydrochloride hydrate [1684-40-8]; Down 200; 15.8uM; MCF7; HT_HG-U133A	0.001585	1	0.0432	0.4481	9	199	DDX3X,FBXO38,PIGA,MBTPS2,WDR48,PTBP3,NEMP1,FOXJ3,LEPROTL1
Drug	5470_UP	Roxarsone [121-19-7]; Up 200; 15.2uM; MCF7; HT_HG-U133A	0.001585	1	0.0432	0.4481	9	199	PIGN,GDAP1,FRS2,ATG5,PTBP3,FOXN2,ZBTB1,MSH6,RNF6
Drug	1277_UP	Oxantel pamoate [68813-55-8]; Up 200; 6.6uM; HL60; HT_HG-U133A	0.001585	1	0.0432	0.4481	9	199	MON2,ATP6V1C1,RNGTT,MDM2,FBXO38,NFYA,ATL2,ZDHHC17,FOXJ3
Drug	7284_DN	Dosulepin hydrochloride [897-15-4]; Down 200; 12uM; PC3; HT_HG-U133A	0.001585	1	0.0432	0.4481	9	199	PIGN,KLHL9,MBTPS2,POLR1B,NEMP1,TRIM23,C18orf25,ZNF84,NNT
Drug	7212_DN	Delsoline [509-18-2]; Down 200; 8.6uM; MCF7; HT_HG-U133A	0.001585	1	0.0432	0.4481	9	199	RNGTT,SEC24A,WDR48,CUL2,PHTF2,ZNF20,CSE1L,RP2,NNT
Drug	961_DN	5253409; Down 200; 17uM; MCF7; HT_HG-U133A_EA	0.001585	1	0.0432	0.4481	9	199	ADAM10,PHKB,EFEMP1,POLR1B,TWSG1,PHTF2,PPP2R1B,C1orf115,PCNX4
Drug	1557_DN	Vinpocetine [42971-09-5]; Down 200; 11.4uM; HL60; HG-U133A	0.001585	1	0.0432	0.4481	9	199	DHX15,KPNA1,TRAPPC11,NUP98,RANBP6,LAMP2,PALB2,ARCN1,MTM1
Drug	5426_DN	Molsidomine [25717-80-0]; Down 200; 16.6uM; MCF7; HT_HG-U133A	0.001585	1	0.0432	0.4481	9	199	GDAP1,MDM2,SLC35D1,PHTF2,ZBTB1,PDE12,HS2ST1,MTM1,HERC4
Drug	5283_DN	Apomorphine hydrochloride hemihydrate [41372-20-7]; Down 200; 6.4uM; MCF7; HT_HG-U133A	0.001585	1	0.0432	0.4481	9	199	MBTPS2,SEC23A,SEL1L,CUL2,C12orf4,NUP98,METTL4,TRIM23,MTM1
Drug	3079_DN	Lorglumide sodium salt [97964-56-2]; Down 200; 8.4uM; HL60; HT_HG-U133A	0.001585	1	0.0432	0.4481	9	199	ZNF155,SOCS6,MDM2,DDX3X,PLAA,NFYA,SEL1L,CUL2,HERC4
Drug	6342_DN	Remoxipride Hydrochloride [73220-03-8]; Down 200; 9.8uM; PC3; HT_HG-U133A	0.001585	1	0.0432	0.4481	9	199	TTC26,NXPE3,PHKB,HSPA4,RBL2,MSH6,MTM1,PTCD2,NNT
Drug	4261_DN	Zuclopenthixol hydrochloride [633-59-0]; Down 200; 9.2uM; PC3; HT_HG-U133A	0.001585	1	0.0432	0.4481	9	199	GDAP1,NCBP1,MDM2,MBTPS2,RBL2,FASTKD2,FOXJ3,TRIM23,ZNF10
Drug	3446_DN	Proadifen hydrochloride [62-68-0]; Down 200; 10.2uM; MCF7; HT_HG-U133A	0.001585	1	0.0432	0.4481	9	199	ATP6V1C1,CUL2,PTBP3,PHTF2,YTHDC2,HIPK3,PTCD2,AKAP10,NNT
Drug	1337_DN	Bacampicillin hydrochloride [37661-08-8]; Down 200; 8uM; HL60; HT_HG-U133A	0.001585	1	0.0432	0.4481	9	199	NCBP1,RXYLT1,DDX3X,SLC35D1,NFYA,ARMC8,SEL1L,CUL4B,YTHDC2
Drug	7452_DN	Trazodone hydrochloride [25332-39-2]; Down 200; 9.8uM; MCF7; HT_HG-U133A	0.001585	1	0.0432	0.4481	9	199	CLASP2,LDAH,SNX13,ARMC8,ATG5,IKZF5,RNF6,MTM1,RAB33B
Drug	4564_DN	Etidronic acid, disodium salt [7414-83-7]; Down 200; 16uM; PC3; HT_HG-U133A	0.001585	1	0.0432	0.4481	9	199	RNGTT,DDX3X,FBXO38,PLAA,PTBP3,NEMP1,ZNF254,TRIM23,MTM1
Drug	6806_DN	Cyproterone acetate [427-51-0]; Down 200; 9.6uM; MCF7; HT_HG-U133A	0.001585	1	0.0432	0.4481	9	199	FRS2,ADAM10,RCHY1,CPSF6,YTHDC2,ATF2,TMEM267,RP2,STK38L
Drug	6963_DN	haloperidol; Down 200; 10uM; MCF7; HT_HG-U133A	0.001585	1	0.0432	0.4481	9	199	ZNF268,ZNF813,NFYA,HSPA4,SEL1L,ZDHHC17,C21orf91,C1orf115,THADA
Drug	6228_DN	Dihydrostreptomycin sulfate [5490-27-7]; Down 200; 2.8uM; MCF7; HT_HG-U133A	0.001585	1	0.0432	0.4481	9	199	MDM2,HSPA4,WDR48,NEMP1,CPSF6,YTHDC2,ATP2C1,HS2ST1,HCCS
Drug	6239_DN	Phenethicillin potassium salt [132-93-4]; Down 200; 10uM; MCF7; HT_HG-U133A	0.001585	1	0.0432	0.4481	9	199	KLHL24,SOCS6,MDM2,POLR1B,KPNA1,RBL2,C18orf25,TARDBP,SEC23IP
Drug	2237_DN	Dihydrostreptomycin sulfate [5490-27-7]; Down 200; 2.8uM; MCF7; HT_HG-U133A	0.001585	1	0.0432	0.4481	9	199	PIGN,ATP6V1C1,ZSCAN12,ERCC6,RNGTT,MDM2,NXPE3,FOXN2,C21orf91
Drug	2018_DN	Oleandomycin phosphate [7060-74-4]; Down 200; 5uM; HL60; HG-U133A	0.001641	1	0.04418	0.4582	9	200	KLHL24,RIOK3,DDX3X,DHX15,RINT1,CANX,ATF2,SEC23IP,DOP1A
Drug	885_UP	5186223; Up 200; 12uM; MCF7; HT_HG-U133A_EA	0.001641	1	0.04418	0.4582	9	200	MDM2,SNX13,MBTPS2,ZBTB33,MCPH1,HIPK3,RNF6,PCNX4,ZW10
Drug	1966_DN	Naphazoline hydrochloride [550-99-2]; Down 200; 16.2uM; HL60; HG-U133A	0.001641	1	0.04418	0.4582	9	200	EPS15,ATP6V1C1,MED23,RBL2,VPS8,LAMP2,TMEM267,HS2ST1,TMEM184C
Drug	2061_DN	Acetylsalicylsalicylic acid [530-75-6]; Down 200; 13.4uM; PC3; HT_HG-U133A	0.001641	1	0.04418	0.4582	9	200	APH1B,RNGTT,BACH1,SPIN1,RBL2,NUP98,USO1,NNT,RAB33B
Drug	4625_DN	Kanamycin A sulfate [25389-94-0]; Down 200; 6.8uM; PC3; HT_HG-U133A	0.001641	1	0.04418	0.4582	9	200	ATP6V1C1,MDM2,ADAM10,MFAP3,MBTPS2,SEL1L,ZNF254,THADA,RAB33B
Drug	2573_UP	Atractyloside potassium salt [102130-43-8]; Up 200; 5uM; HL60; HT_HG-U133A	0.001641	1	0.04418	0.4582	9	200	RNGTT,ZNF155,BACH1,GDAP1,SNX13,CUL4B,PHTF2,THAP9,HIPK3
Drug	4828_DN	Simvastatin [79902-63-9]; Down 200; 9.6uM; MCF7; HT_HG-U133A	0.001641	1	0.04418	0.4582	9	200	ZNF813,SOCS6,SEL1L,CUL2,C18orf25,PPP2R1B,MTM1,TMEM184C,RP2
Drug	3886_UP	Tolbutamide [64-77-7]; Up 200; 14.8uM; MCF7; HT_HG-U133A	0.001641	1	0.04418	0.4582	9	200	MDM2,SNX13,SLC35D1,CUL2,ZBTB1,RBM12,RNF6,IRAK4,HERC4
Drug	1339_UP	Digitoxigenin [143-62-4]; Up 200; 10.6uM; HL60; HT_HG-U133A	0.001647	1	0.04429	0.4593	8	162	KLHL24,SEC24A,DDX3X,NFYA,IKZF5,C18orf25,AKAP10,ZBTB11
Drug	CID000003835	AC1L1GTN	0.001707	1	0.04583	0.4753	3	18	SEC23A,NAPB,USO1
Drug	CID000012577	5-nitro-2-furoic acid	0.001766	1	0.04734	0.491	2	5	DLD,NNT
Drug	2920_UP	Proscillaridin A [466-06-8]; Up 200; 7.6uM; HL60; HT_HG-U133A	0.001779	1	0.04763	0.494	8	164	KLHL24,DDX3X,NFYA,FASTKD2,STAM,C21orf91,C18orf25,ZBTB11
Drug	CID006914565	AC1OCA7P	0.001844	1	0.04929	0.5112	5	65	GFPT1,EFEMP1,COPB1,ARCN1,PAPOLG
Drug	ctd:C009277	sodium arsenate	0.001848	1	0.04931	0.5114	38	1720	KLHL24,HIF1A,SAMD8,ORC3,MATR3,BACH1,TSN,MDM2,ADAM10,SLC38A2,MKLN1,ARRDC3,HSPA4,PUS7,COPB1,RCHY1,SGCB,CPSF6,CANX,LAMP2,IDE,FCHO2,PPAT,SHOC2,PAPOLG,HIPK3,C21orf91,TARDBP,INTS6,AKTIP,PPP2R5C,SF3B1,MTM1,DPY19L4,AKAP10,TBC1D23,HSPA14,FAM126B
Disease	C0878677	Glycogen Storage Disease Type IIb	9.469e-06	0.0362	0.0362	0.3195	4	11	PIK3R4,CUL4B,ZBTB33,LAMP2

## Sheet: module_blue
Category	ID	Name	p-value	q-value Bonferroni	q-value FDR B&H	q-value FDR B&Y	Hit Count in Query List	Hit Count in Genome	Hit in Query List
GO: Molecular Function	GO:0003735	structural constituent of ribosome	8.632e-45	9.331e-42	9.331e-42	7.057e-41	61	205	RPL26,RPL27,RPL30,RPL27A,RPL28,RPL29,RPL31,RPL32,RPL34,RPL36AL,RPL37,RPL37A,RPL38,RPLP0,RPLP1,RPLP2,MRPS12,RPS3,RPS4Y1,RPS5,RPS6,RPS8,MRPL51,RPS9,RPS11,RPS12,RPS14,MRPL27,RPS15,RPS16,RPS18,RPS21,RPS24,RPS28,RPS29,FAU,MRPL28,RPL10A,RPL14,RPL35,RPL13A,UBA52,RPL36,MRPL55,MRPL14,MRPS11,MRPL41,RPLP0P6,MRPL20,MRPL54,MRPL52,MRPL2,MRPS18A,MRPL4,MRPS2,RPL26L1,RPL7A,RPL8,RPL13,RPL18,RPL19
GO: Molecular Function	GO:0003723	RNA binding	2.8e-24	3.027e-21	1.514e-21	1.145e-20	139	1973	POP7,RPL26,RPL27,RPL30,RPL27A,RPL28,RPL29,RPL31,RPL32,CTU2,RPL34,RPL37,RPL37A,RPL38,RPLP0,MRPS12,RPN1,RPS3,RPS4Y1,RPS5,RPS6,RPS8,RPS9,RPS11,RPS12,RPS14,MRPL27,RPS15,RPS16,RPS18,RPS21,RPS24,RPS28,MDH2,FARSA,PEF1,FAU,RACK1,MCRS1,NOP10,NOP56,SLC25A5,NELFCD,PUF60,TRMT1,APEH,ZNF622,APEX1,MRPL28,NUDT16L1,CMSS1,NHP2,TRUB2,EEF1A1P5,NSUN5,CCDC124,CCT5,RBMX2,TIMM50,RPUSD2,EIF3C,EIF3G,LSM2,EIF3H,EIF3I,EXOSC…
GO: Molecular Function	GO:0005198	structural molecule activity	2.13e-20	2.302e-17	7.674e-18	5.804e-17	75	779	RPL26,RPL27,RPL30,RPL27A,RPL28,RPL29,RPL31,RPL32,RPL34,RPL36AL,RPL37,RPL37A,RPL38,RPLP0,RPLP1,RPLP2,MRPS12,RPS3,RPS4Y1,RPS5,RPS6,RPS8,MRPL51,RPS9,ACTB,RPS11,RPS12,RPS14,MRPL27,RPS15,ACTG1,RPS16,RPS18,RPS21,RPS24,RPS28,RPS29,TUBB3,FAU,ACTL6B,SEC13,MRPL28,VPS25,RPL10A,TUBA1C,RPL14,RPL35,RPL13A,DCTN3,COPE,UBA52,MYL6B,CLTA,RPL36,MRPL55,MRPL14,MRPS11,MRPL41,RPLP0P6,PSMD11,MRPL20,MRPL54,MRPL52,ARPC2,MR…
GO: Molecular Function	GO:0019843	rRNA binding	1.567e-11	1.694e-08	4.234e-09	3.203e-08	17	72	RPL37,RPL37A,RPLP0,RPS3,RPS4Y1,RPS5,RPS9,RPS11,RPS14,RPS18,MRPS11,RPLP0P6,ERAL1,MRPL20,MRPS18A,RPL8,RPL19
GO: Molecular Function	GO:0016491	oxidoreductase activity	5.306e-09	5.736e-06	8.09e-07	6.119e-06	62	983	AKR1A1,MDH2,ECSIT,ALDOC,AKR1B1,UQCRHL,SEC13,SELENOW,FOXRED1,ALKBH7,APEX1,MSRB2,DYNLL1,SOD1,GAPDH,BCAT2,NDUFA8,NDUFB2,NDUFB7,NDUFB8,NDUFB9,NDUFB10,NDUFS3,NDUFV1,NDUFS5,NDUFS8,NDUFV3,BLVRB,UQCRFS1P1,GPX1,GPX4,TXNDC17,PRDX2,SLC2A6,PRDX1,HSD17B10,TPI1,PARK7,PHB2,HMOX2,PFKM,TXN,GRHPR,PGAM4,PKM,UQCRC1,UQCRH,PRDX5,TXN2,COX4I1,COX6B1,POR,IDH3B,IDH3G,NDUFS7,EIF6,IVD,CIAPIN1,CCS,NOSIP,ENO1,DCXR
GO: Molecular Function	GO:0050136	NADH dehydrogenase (quinone) activity	5.987e-09	6.472e-06	8.09e-07	6.119e-06	12	47	NDUFA8,NDUFB2,NDUFB7,NDUFB8,NDUFB9,NDUFB10,NDUFS3,NDUFV1,NDUFS5,NDUFS8,NDUFV3,NDUFS7
GO: Molecular Function	GO:0008137	NADH dehydrogenase (ubiquinone) activity	5.987e-09	6.472e-06	8.09e-07	6.119e-06	12	47	NDUFA8,NDUFB2,NDUFB7,NDUFB8,NDUFB9,NDUFB10,NDUFS3,NDUFV1,NDUFS5,NDUFS8,NDUFV3,NDUFS7
GO: Molecular Function	GO:0003954	NADH dehydrogenase activity	5.987e-09	6.472e-06	8.09e-07	6.119e-06	12	47	NDUFA8,NDUFB2,NDUFB7,NDUFB8,NDUFB9,NDUFB10,NDUFS3,NDUFV1,NDUFS5,NDUFS8,NDUFV3,NDUFS7
GO: Molecular Function	GO:0016655	oxidoreductase activity, acting on NAD(P)H, quinone or similar compound as acceptor	1.499e-08	1.62e-05	1.8e-06	1.361e-05	13	61	NDUFA8,NDUFB2,NDUFB7,NDUFB8,NDUFB9,NDUFB10,NDUFS3,NDUFV1,NDUFS5,NDUFS8,NDUFV3,NDUFS7,DCXR
GO: Molecular Function	GO:0016651	oxidoreductase activity, acting on NAD(P)H	3.184e-08	3.442e-05	3.442e-06	2.604e-05	18	129	ECSIT,NDUFA8,NDUFB2,NDUFB7,NDUFB8,NDUFB9,NDUFB10,NDUFS3,NDUFV1,NDUFS5,NDUFS8,NDUFV3,TXNDC17,PARK7,TXN,POR,NDUFS7,DCXR
GO: Molecular Function	GO:0008135	translation factor activity, RNA binding	8.97e-07	0.0009696	8.815e-05	0.0006667	13	85	EEF1A1P5,EIF3C,EIF3G,EIF3H,EIF3I,EIF2B3,EIF2B2,EIF3K,TUFM,C12orf65,EIF6,EIF3CL,EEF1B2
GO: Molecular Function	GO:0051536	iron-sulfur cluster binding	1.066e-06	0.001152	8.865e-05	0.0006705	12	73	RPS3,ATOX1,NDUFV1,NDUFS8,UQCRFS1P1,NTHL1,PARK7,NDUFS7,CIAPIN1,URM1,CCS,NUBP2
GO: Molecular Function	GO:0051540	metal cluster binding	1.066e-06	0.001152	8.865e-05	0.0006705	12	73	RPS3,ATOX1,NDUFV1,NDUFS8,UQCRFS1P1,NTHL1,PARK7,NDUFS7,CIAPIN1,URM1,CCS,NUBP2
GO: Molecular Function	GO:0019783	ubiquitin-like protein-specific protease activity	1.331e-06	0.001439	0.0001028	0.0007774	30	393	ACTB,MAP1LC3B2,MCRS1,OTUB1,NPRL2,RUVBL1,ATG4B,NSFL1C,ADRM1,WDR45,PARK7,UBA52,UBB,UBC,UCHL1,UFD1,PHF23,PSMA7,PSMB2,PSMB3,PSMB6,PSMB7,PSMC3,PSMC4,PSMC5,PSMD3,PSMD7,PSMD8,PSMD11,UBXN1
GO: Molecular Function	GO:0004843	thiol-dependent ubiquitin-specific protease activity	3.238e-06	0.0035	0.0002334	0.001765	24	287	ACTB,MCRS1,OTUB1,RUVBL1,ADRM1,PARK7,UBA52,UBB,UBC,UCHL1,UFD1,PSMA7,PSMB2,PSMB3,PSMB6,PSMB7,PSMC3,PSMC4,PSMC5,PSMD3,PSMD7,PSMD8,PSMD11,UBXN1
GO: Molecular Function	GO:0101005	ubiquitinyl hydrolase activity	3.652e-06	0.003947	0.0002467	0.001866	24	289	ACTB,MCRS1,OTUB1,RUVBL1,ADRM1,PARK7,UBA52,UBB,UBC,UCHL1,UFD1,PSMA7,PSMB2,PSMB3,PSMB6,PSMB7,PSMC3,PSMC4,PSMC5,PSMD3,PSMD7,PSMD8,PSMD11,UBXN1
GO: Molecular Function	GO:0044769	ATPase activity, coupled to transmembrane movement of ions, rotational mechanism	1.254e-05	0.01355	0.0007898	0.005974	8	39	ATP5F1EP2,ATP5F1A,ATP5F1B,ATP5MC2,ATP6V0B,ATP6AP1,ATP5PO,ATP6V0D1
GO: Molecular Function	GO:0003743	translation initiation factor activity	1.315e-05	0.01422	0.0007898	0.005974	9	51	EIF3C,EIF3G,EIF3H,EIF3I,EIF2B3,EIF2B2,EIF3K,EIF6,EIF3CL
GO: Molecular Function	GO:0046933	proton-transporting ATP synthase activity, rotational mechanism	1.52e-05	0.01643	0.0008649	0.006541	6	20	ATP5F1EP2,ATP5F1A,ATP5F1B,ATP5MC2,ATP6AP1,ATP5PO
GO: Molecular Function	GO:0090079	translation regulator activity, nucleic acid binding	1.844e-05	0.01994	0.0009969	0.00754	13	111	EEF1A1P5,EIF3C,EIF3G,EIF3H,EIF3I,EIF2B3,EIF2B2,EIF3K,TUFM,C12orf65,EIF6,EIF3CL,EEF1B2
GO: Molecular Function	GO:0043130	ubiquitin binding	2.241e-05	0.02423	0.001154	0.008726	11	82	OTUB1,SIRT2,AUP1,NSFL1C,ADRM1,UBE2L6,UCHL1,TOLLIP,ZFAND2B,UBXN1,VPS28
GO: Molecular Function	GO:0045182	translation regulator activity	2.481e-05	0.02682	0.001219	0.009219	15	148	RPS9,RPS14,EEF1A1P5,EIF3C,EIF3G,EIF3H,EIF3I,EIF2B3,EIF2B2,EIF3K,TUFM,C12orf65,EIF6,EIF3CL,EEF1B2
GO: Molecular Function	GO:0016861	intramolecular oxidoreductase activity, interconverting aldoses and ketoses	2.67e-05	0.02887	0.001255	0.009493	8	43	ALDOC,GAPDH,TALDO1,TKT,TPI1,PFKM,PKM,ENO1
GO: Molecular Function	GO:0008234	cysteine-type peptidase activity	4.479e-05	0.04842	0.00199	0.01505	40	711	RPS3,ACTB,RACK1,MAP1LC3B2,MCRS1,OTUB1,NPRL2,RUVBL1,ATG4B,NSFL1C,HTRA2,ADRM1,GPX1,WDR45,PARK7,UBA52,UBB,UBC,UCHL1,UFD1,PRDX5,PHF23,POR,CSTB,PSMA7,PSMB2,PSMB3,PSMB6,PSMB7,PSMC3,PSMC4,PSMC5,PSMD3,PSMD7,PSMD8,PSMD11,PIH1D1,FIS1,UBXN1,BCAP31
GO: Molecular Function	GO:0043021	ribonucleoprotein complex binding	4.602e-05	0.04975	0.00199	0.01505	15	156	RPLP1,RPN2,NAA10,RACK1,GADD45GIP1,TIMM50,SNRPD2,EIF3K,NME1,RPL35,PRMT1,PPP1CA,EIF6,ERAL1,PQBP1
GO: Molecular Function	GO:0016860	intramolecular oxidoreductase activity	5.414e-05	0.05852	0.002207	0.01669	11	90	ALDOC,EBP,GAPDH,ERP29,TALDO1,TKT,TPI1,PFKM,PKM,ECH1,ENO1
GO: Molecular Function	GO:0009055	electron transfer activity	5.512e-05	0.05958	0.002207	0.01669	13	123	AKR1A1,AKR1B1,UQCRHL,NDUFS3,UQCRFS1P1,PHB2,UQCRC1,UQCRH,COX4I1,COX6B1,POR,IDH3B,CIAPIN1
GO: Molecular Function	GO:0030515	snoRNA binding	7.795e-05	0.08426	0.003009	0.02276	6	26	NOP10,NOP56,NUDT16L1,NHP2,IMP4,SNU13
GO: Molecular Function	GO:0009678	pyrophosphate hydrolysis-driven proton transmembrane transporter activity	9.582e-05	0.1036	0.003524	0.02665	8	51	ATP5F1EP2,ATP5F1A,ATP5F1B,ATP5MC2,ATP6V0B,ATP6AP1,ATP5PO,ATP6V0D1
GO: Molecular Function	GO:0004365	glyceraldehyde-3-phosphate dehydrogenase (NAD+) (phosphorylating) activity	9.78e-05	0.1057	0.003524	0.02665	6	27	ALDOC,GAPDH,TPI1,PFKM,PKM,ENO1
GO: Molecular Function	GO:0016209	antioxidant activity	0.000108	0.1168	0.003767	0.02849	11	97	SELENOW,SOD1,GPX1,GPX4,TXNDC17,PRDX2,PRDX1,PARK7,TXN,PRDX5,CCS
GO: Molecular Function	GO:0070180	large ribosomal subunit rRNA binding	0.0001242	0.1342	0.003835	0.02901	4	10	RPL37A,RPLP0,RPLP0P6,RPL19
GO: Molecular Function	GO:0016681	oxidoreductase activity, acting on diphenols and related substances as donors, cytochrome as acceptor	0.0001242	0.1342	0.003835	0.02901	4	10	UQCRHL,UQCRFS1P1,UQCRC1,UQCRH
GO: Molecular Function	GO:0008121	ubiquinol-cytochrome-c reductase activity	0.0001242	0.1342	0.003835	0.02901	4	10	UQCRHL,UQCRFS1P1,UQCRC1,UQCRH
GO: Molecular Function	GO:0004579	dolichyl-diphosphooligosaccharide-protein glycotransferase activity	0.0001242	0.1342	0.003835	0.02901	4	10	RPN1,RPN2,DAD1,DDOST
GO: Molecular Function	GO:0032182	ubiquitin-like protein binding	0.00017	0.1838	0.004908	0.03712	11	102	OTUB1,SIRT2,AUP1,NSFL1C,ADRM1,UBE2L6,UCHL1,TOLLIP,ZFAND2B,UBXN1,VPS28
GO: Molecular Function	GO:0004347	glucose-6-phosphate isomerase activity	0.0001823	0.1971	0.004908	0.03712	6	30	ALDOC,GAPDH,TPI1,PFKM,PKM,ENO1
GO: Molecular Function	GO:0140104	molecular carrier activity	0.0001907	0.2061	0.004908	0.03712	4	11	ATOX1,PARK7,URM1,CCS
GO: Molecular Function	GO:0070181	small ribosomal subunit rRNA binding	0.0001907	0.2061	0.004908	0.03712	4	11	RPS3,RPS14,MRPS11,MRPS18A
GO: Molecular Function	GO:0016679	oxidoreductase activity, acting on diphenols and related substances as donors	0.0001907	0.2061	0.004908	0.03712	4	11	UQCRHL,UQCRFS1P1,UQCRC1,UQCRH
GO: Molecular Function	GO:0004576	oligosaccharyl transferase activity	0.0001907	0.2061	0.004908	0.03712	4	11	RPN1,RPN2,DAD1,DDOST
GO: Molecular Function	GO:0051920	peroxiredoxin activity	0.0001907	0.2061	0.004908	0.03712	4	11	PRDX2,PRDX1,PARK7,PRDX5
GO: Molecular Function	GO:0004332	fructose-bisphosphate aldolase activity	0.0002206	0.2385	0.005337	0.04037	6	31	ALDOC,GAPDH,TPI1,PFKM,PKM,ENO1
GO: Molecular Function	GO:0003872	6-phosphofructokinase activity	0.0002206	0.2385	0.005337	0.04037	6	31	ALDOC,GAPDH,TPI1,PFKM,PKM,ENO1
GO: Molecular Function	GO:0016531	copper chaperone activity	0.0002271	0.2455	0.005337	0.04037	3	5	ATOX1,PARK7,CCS
GO: Molecular Function	GO:0005471	ATP:ADP antiporter activity	0.0002271	0.2455	0.005337	0.04037	3	5	SLC25A4,SLC25A5,SLC25A6
GO: Molecular Function	GO:0004298	threonine-type endopeptidase activity	0.0002693	0.2911	0.006064	0.04586	5	21	PSMA7,PSMB2,PSMB3,PSMB6,PSMB7
GO: Molecular Function	GO:0070003	threonine-type peptidase activity	0.0002693	0.2911	0.006064	0.04586	5	21	PSMA7,PSMB2,PSMB3,PSMB6,PSMB7
GO: Molecular Function	GO:0016835	carbon-oxygen lyase activity	0.0003047	0.3294	0.006699	0.05067	16	205	RPS3,ALDOC,SEC13,APEX1,GAPDH,BCAT2,NTHL1,SLC2A6,TPI1,PARK7,PFKM,PGAM4,PKM,EIF6,ECHS1,ENO1
GO: Molecular Function	GO:0016866	intramolecular transferase activity	0.0003126	0.3379	0.006699	0.05067	13	146	ALDOC,SEC13,TRUB2,RPUSD2,GAPDH,SLC2A6,TPI1,PFKM,PGAM4,PKM,PMM1,EIF6,ENO1
GO: Molecular Function	GO:0004807	triose-phosphate isomerase activity	0.0003161	0.3417	0.006699	0.05067	6	33	ALDOC,GAPDH,TPI1,PFKM,PKM,ENO1
GO: Molecular Function	GO:0016853	isomerase activity	0.0003574	0.3863	0.007429	0.05619	20	294	ALDOC,SEC13,TRUB2,EBP,RPUSD2,GAPDH,ERP29,TALDO1,AIP,TKT,SLC2A6,TPI1,PFKM,PIN1,PGAM4,PKM,PMM1,EIF6,ECH1,ENO1
GO: Molecular Function	GO:0001054	RNA polymerase I activity	0.0003946	0.4266	0.008048	0.06087	4	13	POLR1H,POLR2F,POLR2H,POLR2L
GO: Molecular Function	GO:0016830	carbon-carbon lyase activity	0.0004056	0.4384	0.008119	0.0614	10	95	ALDOC,GAPDH,MOCS3,OAZ1,TPI1,PARK7,PFKM,PKM,UROD,ENO1
GO: Molecular Function	GO:0015078	proton transmembrane transporter activity	0.0004333	0.4684	0.008369	0.0633	13	151	ATP5F1EP2,ATP5F1A,ATP5F1B,ATP5MC2,ATP5ME,ATP6V0B,ATP6AP1,ATP5PO,ATP6V0D1,SLC2A6,PHB2,COX4I1,COX6B1
GO: Molecular Function	GO:0008443	phosphofructokinase activity	0.0004412	0.4769	0.008369	0.0633	6	35	ALDOC,GAPDH,TPI1,PFKM,PKM,ENO1
GO: Molecular Function	GO:0051117	ATPase binding	0.0004413	0.477	0.008369	0.0633	10	96	CLPP,RUVBL1,ATOX1,RUVBL2,NSFL1C,SNU13,UFD1,PIH1D1,UBXN1,ARPC2
GO: Molecular Function	GO:0051082	unfolded protein binding	0.0004999	0.5404	0.009317	0.07046	12	134	PFDN6,CCT7,CCT5,HSP90AB2P,SPG7,RUVBL2,HTRA2,AIP,PFDN1,PFDN5,HSP90AA2P,HSP90AB3P
GO: Molecular Function	GO:0019104	DNA N-glycosylase activity	0.0005399	0.5837	0.009893	0.07482	4	14	RPS3,MPG,APEX1,NTHL1
GO: Molecular Function	GO:0051287	NAD binding	0.0006565	0.7096	0.01183	0.08945	8	67	AHCY,SIRT2,GAPDH,NDUFV1,HSD17B10,GRHPR,IDH3B,IDH3G
GO: Molecular Function	GO:0008379	thioredoxin peroxidase activity	0.0007612	0.8229	0.01302	0.09847	3	7	PRDX2,PRDX1,PRDX5
GO: Molecular Function	GO:0016530	metallochaperone activity	0.0007612	0.8229	0.01302	0.09847	3	7	ATOX1,PARK7,CCS
GO: Molecular Function	GO:0015217	ADP transmembrane transporter activity	0.0007612	0.8229	0.01302	0.09847	3	7	SLC25A4,SLC25A5,SLC25A6
GO: Molecular Function	GO:0019200	carbohydrate kinase activity	0.0007708	0.8333	0.01302	0.09847	7	53	ALDOC,NAGK,GAPDH,TPI1,PFKM,PKM,ENO1
GO: Molecular Function	GO:0045296	cadherin binding	0.0008431	0.9114	0.01375	0.104	21	338	RPL29,RPL34,RACK1,PPME1,NOP56,PUF60,AHSA1,RUVBL1,BSG,RPL14,PRDX1,LYPLA2,PARK7,TWF2,ARFIP2,PKM,PPP1CA,PSMB6,CCS,ENO1,RPL7A
GO: Molecular Function	GO:0015207	adenine transmembrane transporter activity	0.0008521	0.9211	0.01375	0.104	2	2	SLC25A4,SLC25A5
GO: Molecular Function	GO:0005459	UDP-galactose transmembrane transporter activity	0.0008521	0.9211	0.01375	0.104	2	2	SLC35A2,SLC35B1
GO: Molecular Function	GO:0051539	4 iron, 4 sulfur cluster binding	0.001056	1	0.01679	0.127	6	41	NDUFV1,NDUFS8,NTHL1,NDUFS7,CIAPIN1,NUBP2
GO: Molecular Function	GO:0036435	K48-linked polyubiquitin modification-dependent protein binding	0.001192	1	0.01867	0.1412	3	8	UFD1,ZFAND2B,UBXN1
GO: Molecular Function	GO:0016832	aldehyde-lyase activity	0.001364	1	0.02107	0.1593	6	43	ALDOC,GAPDH,TPI1,PFKM,PKM,ENO1
GO: Molecular Function	GO:0016868	intramolecular transferase activity, phosphotransferases	0.001436	1	0.02187	0.1654	11	131	ALDOC,SEC13,GAPDH,SLC2A6,TPI1,PFKM,PGAM4,PKM,PMM1,EIF6,ENO1
GO: Molecular Function	GO:0016684	oxidoreductase activity, acting on peroxide as acceptor	0.001625	1	0.0244	0.1845	7	60	GPX1,GPX4,TXNDC17,PRDX2,PRDX1,PARK7,PRDX5
GO: Molecular Function	GO:0140098	catalytic activity, acting on RNA	0.002082	1	0.03083	0.2332	24	438	POP7,POLR1H,FARSA,TRMT1,APEX1,NUDT16L1,RBMX2,EXOSC7,INPP5K,TSEN34,EXOSC4,DDX49,POLR2F,POLR2H,POLR2I,POLR2L,DDX56,ENDOV,EXOSC5,QARS1,DALRD3,RNH1,QTRT1,DDX39A
GO: Molecular Function	GO:0043531	ADP binding	0.002181	1	0.03186	0.241	6	47	RUVBL1,ATP5F1A,ATP5F1B,RUVBL2,PKM,PPP5C
GO: Molecular Function	GO:0016532	superoxide dismutase copper chaperone activity	0.002434	1	0.03391	0.2565	2	3	PARK7,CCS
GO: Molecular Function	GO:1990932	5.8S rRNA binding	0.002434	1	0.03391	0.2565	2	3	RPS9,RPL19
GO: Molecular Function	GO:0016744	transferase activity, transferring aldehyde or ketonic groups	0.002447	1	0.03391	0.2565	3	10	BCAT2,TALDO1,TKT
GO: Molecular Function	GO:0140078	class I DNA-(apurinic or apyrimidinic site) endonuclease activity	0.002447	1	0.03391	0.2565	3	10	RPS3,APEX1,NTHL1
GO: Molecular Function	GO:0016779	nucleotidyltransferase activity	0.002819	1	0.03857	0.2917	16	253	CTU2,POLR1H,MCRS1,NOP10,CCT7,NHP2,CCT5,INPP5K,MOCS3,EIF2B3,POLR2F,POLR2H,POLR2I,POLR2L,POLE4,RFC2
GO: Molecular Function	GO:0016836	hydro-lyase activity	0.002913	1	0.03937	0.2977	13	186	ALDOC,SEC13,GAPDH,BCAT2,SLC2A6,TPI1,PARK7,PFKM,PGAM4,PKM,EIF6,ECHS1,ENO1
GO: Molecular Function	GO:0016799	hydrolase activity, hydrolyzing N-glycosyl compounds	0.003287	1	0.0394	0.298	4	22	RPS3,MPG,APEX1,NTHL1
GO: Molecular Function	GO:0005347	ATP transmembrane transporter activity	0.003293	1	0.0394	0.298	3	11	SLC25A4,SLC25A5,SLC25A6
GO: Molecular Function	GO:0031386	protein tag	0.003293	1	0.0394	0.298	3	11	UBA52,UBB,UBC
GO: Molecular Function	GO:0004784	superoxide dismutase activity	0.003293	1	0.0394	0.298	3	11	SOD1,PARK7,CCS
GO: Molecular Function	GO:0001055	RNA polymerase II activity	0.003293	1	0.0394	0.298	3	11	POLR2F,POLR2H,POLR2L
GO: Molecular Function	GO:0001094	TFIID-class transcription factor complex binding	0.003293	1	0.0394	0.298	3	11	RUVBL1,EDF1,RUVBL2
GO: Molecular Function	GO:0016721	oxidoreductase activity, acting on superoxide radicals as acceptor	0.003293	1	0.0394	0.298	3	11	SOD1,PARK7,CCS
GO: Molecular Function	GO:0004634	phosphopyruvate hydratase activity	0.003316	1	0.0394	0.298	10	125	ALDOC,SEC13,GAPDH,SLC2A6,TPI1,PFKM,PGAM4,PKM,EIF6,ENO1
GO: Molecular Function	GO:0043891	glyceraldehyde-3-phosphate dehydrogenase (NAD(P)+) (phosphorylating) activity	0.003316	1	0.0394	0.298	10	125	ALDOC,SEC13,GAPDH,SLC2A6,TPI1,PFKM,PGAM4,PKM,EIF6,ENO1
GO: Molecular Function	GO:0004618	phosphoglycerate kinase activity	0.003316	1	0.0394	0.298	10	125	ALDOC,SEC13,GAPDH,SLC2A6,TPI1,PFKM,PGAM4,PKM,EIF6,ENO1
GO: Molecular Function	GO:0004619	phosphoglycerate mutase activity	0.003316	1	0.0394	0.298	10	125	ALDOC,SEC13,GAPDH,SLC2A6,TPI1,PFKM,PGAM4,PKM,EIF6,ENO1
GO: Molecular Function	GO:0019829	ATPase-coupled cation transmembrane transporter activity	0.00357	1	0.04194	0.3172	8	87	ATP5F1EP2,ATP5F1A,ATP5F1B,ATP5MC2,ATP6V0B,ATP6AP1,ATP5PO,ATP6V0D1
GO: Molecular Function	GO:0016774	phosphotransferase activity, carboxyl group as acceptor	0.003717	1	0.0432	0.3268	10	127	ALDOC,SEC13,GAPDH,SLC2A6,TPI1,PFKM,PGAM4,PKM,EIF6,ENO1
GO: Molecular Function	GO:0046961	proton-transporting ATPase activity, rotational mechanism	0.00389	1	0.04473	0.3383	4	23	ATP5F1B,ATP6V0B,ATP6AP1,ATP6V0D1
GO: Biological Process	GO:0006614	SRP-dependent cotranslational protein targeting to membrane	1.328e-39	6.422e-36	5.866e-36	5.315e-35	43	105	RPL26,RPL27,RPL30,RPL27A,RPL28,RPL29,RPL31,RPL32,RPL34,RPL37,RPL37A,RPL38,RPLP0,RPLP1,RPLP2,RPS3,RPS4Y1,RPS5,RPS6,RPS8,RPS9,RPS11,RPS12,RPS14,RPS15,RPS16,RPS18,RPS21,RPS24,RPS28,RPS29,RPL10A,RPL14,RPL35,RPL13A,UBA52,RPL36,ZFAND2B,RPL7A,RPL8,RPL13,RPL18,RPL19
GO: Biological Process	GO:0045047	protein targeting to ER	2.426e-39	1.173e-35	5.866e-36	5.315e-35	45	120	RPL26,RPL27,RPL30,RPL27A,RPL28,RPL29,RPL31,RPL32,RPL34,RPL37,RPL37A,RPL38,RPLP0,RPLP1,RPLP2,RPS3,RPS4Y1,RPS5,RPS6,RPS8,RPS9,RPS11,RPS12,RPS14,RPS15,RPS16,RPS18,RPS21,RPS24,RPS28,RPS29,SGTA,RPL10A,RPL14,RPL35,RPL13A,UBA52,PMM1,RPL36,ZFAND2B,RPL7A,RPL8,RPL13,RPL18,RPL19
GO: Biological Process	GO:0006613	cotranslational protein targeting to membrane	9.277e-39	4.485e-35	1.495e-35	1.355e-34	43	109	RPL26,RPL27,RPL30,RPL27A,RPL28,RPL29,RPL31,RPL32,RPL34,RPL37,RPL37A,RPL38,RPLP0,RPLP1,RPLP2,RPS3,RPS4Y1,RPS5,RPS6,RPS8,RPS9,RPS11,RPS12,RPS14,RPS15,RPS16,RPS18,RPS21,RPS24,RPS28,RPS29,RPL10A,RPL14,RPL35,RPL13A,UBA52,RPL36,ZFAND2B,RPL7A,RPL8,RPL13,RPL18,RPL19
GO: Biological Process	GO:0072599	establishment of protein localization to endoplasmic reticulum	1.371e-38	6.629e-35	1.657e-35	1.502e-34	45	124	RPL26,RPL27,RPL30,RPL27A,RPL28,RPL29,RPL31,RPL32,RPL34,RPL37,RPL37A,RPL38,RPLP0,RPLP1,RPLP2,RPS3,RPS4Y1,RPS5,RPS6,RPS8,RPS9,RPS11,RPS12,RPS14,RPS15,RPS16,RPS18,RPS21,RPS24,RPS28,RPS29,SGTA,RPL10A,RPL14,RPL35,RPL13A,UBA52,PMM1,RPL36,ZFAND2B,RPL7A,RPL8,RPL13,RPL18,RPL19
GO: Biological Process	GO:0000184	nuclear-transcribed mRNA catabolic process, nonsense-mediated decay	1.224e-36	5.917e-33	1.183e-33	1.072e-32	43	120	RPL26,RPL27,RPL30,RPL27A,RPL28,RPL29,RPL31,RPL32,RPL34,RPL37,RPL37A,RPL38,RPLP0,RPLP1,RPLP2,RPS3,RPS4Y1,RPS5,RPS6,RPS8,RPS9,RPS11,RPS12,RPS14,RPS15,RPS16,RPS18,RPS21,RPS24,RPS28,RPS29,RPL10A,RPL14,RPL35,RPL13A,UBA52,RPL36,PPP2R1A,RPL7A,RPL8,RPL13,RPL18,RPL19
GO: Biological Process	GO:0006413	translational initiation	2.405e-36	1.163e-32	1.938e-33	1.756e-32	52	198	RPL26,RPL27,RPL30,RPL27A,RPL28,RPL29,RPL31,RPL32,RPL34,RPL37,RPL37A,RPL38,RPLP0,RPLP1,RPLP2,RPS3,RPS4Y1,RPS5,RPS6,RPS8,RPS9,RPS11,RPS12,RPS14,RPS15,RPS16,RPS18,RPS21,RPS24,RPS28,RPS29,EIF3C,EIF3G,EIF3H,EIF3I,RPL10A,EIF2B3,EIF2B2,EIF3K,RPL14,RPL35,RPL13A,UBA52,RPL36,PPP1CA,EIF6,EIF3CL,RPL7A,RPL8,RPL13,RPL18,RPL19
GO: Biological Process	GO:0070972	protein localization to endoplasmic reticulum	9.431e-36	4.56e-32	6.514e-33	5.902e-32	46	149	RPL26,RPL27,RPL30,RPL27A,RPL28,RPL29,RPL31,RPL32,RPL34,RPL37,RPL37A,RPL38,RPLP0,RPLP1,RPLP2,RPS3,RPS4Y1,RPS5,RPS6,RPS8,RPS9,RPS11,RPS12,RPS14,RPS15,RPS16,RPS18,RPS21,RPS24,RPS28,RPS29,SGTA,RPL10A,RPL14,RPL35,RPL13A,UBA52,PMM1,RPL36,ZFAND2B,BCAP31,RPL7A,RPL8,RPL13,RPL18,RPL19
GO: Biological Process	GO:0019083	viral transcription	2.53e-35	1.223e-31	1.529e-32	1.385e-31	51	197	RPL26,RPL27,RPL30,RPL27A,RPL28,RPL29,RPL31,RPL32,RPL34,RPL37,RPL37A,RPL38,RPLP0,RPLP1,RPLP2,RPS3,RPS4Y1,RPS5,RPS6,RPS8,RPS9,RPS11,RPS12,RPS14,RPS15,RPS16,RPS18,RPS21,RPS24,RPS28,RPS29,SEC13,NELFCD,INPP5K,RPL10A,TARBP2,RPL14,RPL35,RPL13A,UBA52,RPL36,POLR2F,POLR2H,POLR2I,POLR2L,PSMC3,RPL7A,RPL8,RPL13,RPL18,RPL19
GO: Biological Process	GO:0006402	mRNA catabolic process	3.451e-35	1.668e-31	1.854e-32	1.68e-31	67	377	RPL26,RPL27,RPL30,RPL27A,RPL28,RPL29,RPL31,RPL32,RPL34,RPL37,RPL37A,RPL38,RPLP0,RPLP1,RPLP2,RPS3,RPS4Y1,RPS5,RPS6,RPS8,RPS9,RPS11,RPS12,RPS14,RPS15,RPS16,RPS18,RPS21,RPS24,RPS28,RPS29,APEX1,NUDT16L1,LSM2,EXOSC7,LSM7,RPL10A,RPL14,RPL35,RPL13A,TBRG4,UBA52,UBB,UBC,EXOSC4,RPL36,PPP2R1A,PSMA7,PSMB2,PSMB3,PSMB6,PSMB7,PSMC3,PSMC4,PSMC5,PSMD3,PSMD7,PSMD8,EXOSC5,PSMD11,RNH1,MRTO4,RPL7A,RPL8,RPL13,RPL18,RP…
GO: Biological Process	GO:0019080	viral gene expression	7.832e-35	3.787e-31	3.787e-32	3.431e-31	52	211	RPL26,RPL27,RPL30,RPL27A,RPL28,RPL29,RPL31,RPL32,RPL34,RPL37,RPL37A,RPL38,RPLP0,RPLP1,RPLP2,RPS3,RPS4Y1,RPS5,RPS6,RPS8,RPS9,RPS11,RPS12,RPS14,RPS15,RPS16,RPS18,RPS21,RPS24,RPS28,RPS29,SEC13,NELFCD,EIF3G,INPP5K,RPL10A,TARBP2,RPL14,RPL35,RPL13A,UBA52,RPL36,POLR2F,POLR2H,POLR2I,POLR2L,PSMC3,RPL7A,RPL8,RPL13,RPL18,RPL19
GO: Biological Process	GO:0043043	peptide biosynthetic process	2.058e-34	9.951e-31	9.047e-32	8.197e-31	94	791	RPL26,RPL27,RPL30,RPL27A,RPL28,RPL29,RPL31,RPL32,RPL34,RPL36AL,RPL37,RPL37A,RPL38,RPLP0,RPLP1,RPLP2,MRPS12,RPS3,RPS4Y1,RPS5,RPS6,RPS8,MRPL51,RPS9,RPS11,RPS12,RPS14,MRPL27,RPS15,RPS16,RPS18,RPS21,RPS24,RPS28,RPS29,FARSA,FAU,RACK1,COA3,APEH,MRPL28,GADD45GIP1,TRUB2,EEF1A1P5,EIF3C,EIF3G,EIF3H,EIF3I,GAPDH,RPL10A,EIF2B3,EIF2B2,EIF3K,TARBP2,MPV17L2,RPL14,GSS,HAGH,RPL35,RPL13A,CDK4,TUFM,UBA52,RPL36,MRPL5…
GO: Biological Process	GO:0006414	translational elongation	4.004e-34	1.936e-30	1.489e-31	1.349e-30	92	764	RPL26,RPL27,RPL30,RPL27A,RPL28,RPL29,RPL31,RPL32,RPL34,RPL36AL,RPL37,RPL37A,RPL38,RPLP0,RPLP1,RPLP2,MRPS12,RPS3,RPS4Y1,RPS5,RPS6,RPS8,MRPL51,RPS9,RPS11,RPS12,RPS14,MRPL27,RPS15,RPS16,RPS18,RPS21,RPS24,RPS28,RPS29,FARSA,FAU,RACK1,COA3,APEH,MRPL28,GADD45GIP1,TRUB2,EEF1A1P5,EIF3C,EIF3G,EIF3H,EIF3I,GAPDH,RPL10A,EIF2B3,EIF2B2,EIF3K,TARBP2,MPV17L2,RPL14,RPL35,RPL13A,CDK4,TUFM,UBA52,RPL36,MRPL55,PPP1CA,…
GO: Biological Process	GO:0006412	translation	4.004e-34	1.936e-30	1.489e-31	1.349e-30	92	764	RPL26,RPL27,RPL30,RPL27A,RPL28,RPL29,RPL31,RPL32,RPL34,RPL36AL,RPL37,RPL37A,RPL38,RPLP0,RPLP1,RPLP2,MRPS12,RPS3,RPS4Y1,RPS5,RPS6,RPS8,MRPL51,RPS9,RPS11,RPS12,RPS14,MRPL27,RPS15,RPS16,RPS18,RPS21,RPS24,RPS28,RPS29,FARSA,FAU,RACK1,COA3,APEH,MRPL28,GADD45GIP1,TRUB2,EEF1A1P5,EIF3C,EIF3G,EIF3H,EIF3I,GAPDH,RPL10A,EIF2B3,EIF2B2,EIF3K,TARBP2,MPV17L2,RPL14,RPL35,RPL13A,CDK4,TUFM,UBA52,RPL36,MRPL55,PPP1CA,…
GO: Biological Process	GO:0006401	RNA catabolic process	2.722e-33	1.316e-29	9.402e-31	8.519e-30	68	417	RPL26,RPL27,RPL30,RPL27A,RPL28,RPL29,RPL31,RPL32,RPL34,RPL37,RPL37A,RPL38,RPLP0,RPLP1,RPLP2,RPS3,RPS4Y1,RPS5,RPS6,RPS8,RPS9,RPS11,RPS12,RPS14,RPS15,RPS16,RPS18,RPS21,RPS24,RPS28,RPS29,APEX1,NUDT16L1,LSM2,EXOSC7,LSM7,RPL10A,RPL14,RPL35,RPL13A,TBRG4,UBA52,UBB,UBC,TRIR,EXOSC4,RPL36,PPP2R1A,PSMA7,PSMB2,PSMB3,PSMB6,PSMB7,PSMC3,PSMC4,PSMC5,PSMD3,PSMD7,PSMD8,EXOSC5,PSMD11,RNH1,MRTO4,RPL7A,RPL8,RPL13,RPL…
GO: Biological Process	GO:0072594	establishment of protein localization to organelle	3.972e-32	1.92e-28	1.28e-29	1.16e-28	80	612	RPL26,RPL27,RPL30,RPL27A,RPL28,RPL29,RPL31,RPL32,RPL34,RPL37,RPL37A,RPL38,RPLP0,RPLP1,RPLP2,RPS3,RPS4Y1,RPS5,RPS6,RPS8,RPS9,RPS11,RPS12,RPS14,RPS15,RPS16,RPS18,RPS21,RPS24,RPS28,RPS29,SLC25A6,RPAIN,SGTA,CCT7,VPS25,MON1A,SIRT2,CCT5,NXT1,TIMM50,VPS11,RUVBL2,RPL10A,PMPCA,HTRA2,RPL14,AIP,PKIG,RPL35,RPL13A,SNF8,CFL1,PHB2,UBA52,UBB,UBC,AP2M1,PEX16,SAMM50,TIMM22,PICK1,PMM1,TOMM7,RPL36,ROMO1,ZFAND2B,PIH1…
GO: Biological Process	GO:0006518	peptide metabolic process	7.111e-32	3.438e-28	2.149e-29	1.947e-28	99	940	RPL26,RPL27,RPL30,RPL27A,RPL28,RPL29,RPL31,RPL32,RPL34,RPL36AL,RPL37,RPL37A,RPL38,RPLP0,RPLP1,RPLP2,MRPS12,RPS3,RPS4Y1,RPS5,RPS6,RPS8,MRPL51,RPS9,RPS11,RPS12,RPS14,MRPL27,RPS15,RPS16,RPS18,RPS21,RPS24,RPS28,RPS29,FARSA,FAU,RACK1,COA3,APEH,MRPL28,GADD45GIP1,TRUB2,EEF1A1P5,EIF3C,EIF3G,EIF3H,EIF3I,SOD1,GAPDH,RPL10A,EIF2B3,EIF2B2,EIF3K,TARBP2,MPV17L2,GPX1,GPX4,RPL14,GSS,HAGH,RPL35,RPL13A,CDK4,PARK7,T…
GO: Biological Process	GO:0006612	protein targeting to membrane	1.868e-31	9.034e-28	5.019e-29	4.548e-28	49	212	RPL26,RPL27,RPL30,RPL27A,RPL28,RPL29,RPL31,RPL32,RPL34,RPL37,RPL37A,RPL38,RPLP0,RPLP1,RPLP2,RPS3,RPS4Y1,RPS5,RPS6,RPS8,RPS9,RPS11,RPS12,RPS14,RPS15,RPS16,RPS18,RPS21,RPS24,RPS28,RPS29,SGTA,INPP5K,RPL10A,RPL14,RPL35,RPL13A,UBA52,PEX16,RPL36,ZFAND2B,FIS1,ZDHHC4,ARPC2,RPL7A,RPL8,RPL13,RPL18,RPL19
GO: Biological Process	GO:0000956	nuclear-transcribed mRNA catabolic process	1.868e-31	9.034e-28	5.019e-29	4.548e-28	49	212	RPL26,RPL27,RPL30,RPL27A,RPL28,RPL29,RPL31,RPL32,RPL34,RPL37,RPL37A,RPL38,RPLP0,RPLP1,RPLP2,RPS3,RPS4Y1,RPS5,RPS6,RPS8,RPS9,RPS11,RPS12,RPS14,RPS15,RPS16,RPS18,RPS21,RPS24,RPS28,RPS29,LSM2,EXOSC7,LSM7,RPL10A,RPL14,RPL35,RPL13A,UBA52,EXOSC4,RPL36,PPP2R1A,EXOSC5,MRTO4,RPL7A,RPL8,RPL13,RPL18,RPL19
GO: Biological Process	GO:0043604	amide biosynthetic process	7.121e-31	3.443e-27	1.812e-28	1.642e-27	97	930	RPL26,RPL27,RPL30,RPL27A,RPL28,RPL29,RPL31,RPL32,RPL34,RPL36AL,RPL37,RPL37A,RPL38,RPLP0,RPLP1,RPLP2,MRPS12,RPS3,RPS4Y1,RPS5,RPS6,RPS8,MRPL51,RPS9,RPS11,RPS12,RPS14,MRPL27,RPS15,RPS16,RPS18,RPS21,RPS24,RPS28,RPS29,FARSA,FAU,RACK1,PEMT,COA3,APEH,MRPL28,GADD45GIP1,TRUB2,EEF1A1P5,ORMDL2,EIF3C,EIF3G,EIF3H,EIF3I,GAPDH,RPL10A,EIF2B3,EIF2B2,EIF3K,TARBP2,MPV17L2,RPL14,GSS,HAGH,RPL35,RPL13A,CDK4,TUFM,UBA52…
GO: Biological Process	GO:0006605	protein targeting	8.897e-31	4.302e-27	2.151e-28	1.949e-27	68	457	RPL26,RPL27,RPL30,RPL27A,RPL28,RPL29,RPL31,RPL32,RPL34,RPL37,RPL37A,RPL38,RPLP0,RPLP1,RPLP2,RPS3,RPS4Y1,RPS5,RPS6,RPS8,RPS9,RPS11,RPS12,RPS14,RPS15,RPS16,RPS18,RPS21,RPS24,RPS28,RPS29,SLC25A6,SGTA,MON1A,TIMM50,VPS11,INPP5K,RPL10A,PMPCA,HTRA2,RPL14,AIP,RPL35,RPL13A,UBA52,UBB,UBC,PEX16,SAMM50,TIMM22,PICK1,PMM1,TOMM7,RPL36,ROMO1,ZFAND2B,ACOT8,FIS1,ECH1,ZDHHC4,ARPC2,TIMM13,TIMM8B,RPL7A,RPL8,RPL13,RPL…
GO: Biological Process	GO:0034655	nucleobase-containing compound catabolic process	2.297e-28	1.111e-24	5.288e-26	4.792e-25	72	562	RPL26,RPL27,RPL30,RPL27A,RPL28,RPL29,RPL31,RPL32,RPL34,RPL37,RPL37A,RPL38,RPLP0,RPLP1,RPLP2,RPS3,RPS4Y1,RPS5,RPS6,RPS8,RPS9,RPS11,RPS12,RPS14,RPS15,RPS16,RPS18,RPS21,RPS24,RPS28,RPS29,AHCY,APEX1,NUDT16L1,LSM2,EXOSC7,LSM7,RPL10A,NTHL1,GPX1,RPL14,RPL35,RPL13A,TBRG4,ACOT7,UBA52,UBB,UBC,TRIR,EXOSC4,RPL36,PPP2R1A,PSMA7,PSMB2,PSMB3,PSMB6,PSMB7,PSMC3,PSMC4,PSMC5,PSMD3,PSMD7,PSMD8,EXOSC5,PSMD11,RNH1,MRTO…
GO: Biological Process	GO:0044270	cellular nitrogen compound catabolic process	4.8e-28	2.321e-24	1.055e-25	9.559e-25	75	617	RPL26,RPL27,RPL30,RPL27A,RPL28,RPL29,RPL31,RPL32,RPL34,RPL37,RPL37A,RPL38,RPLP0,RPLP1,RPLP2,RPS3,RPS4Y1,RPS5,RPS6,RPS8,RPS9,RPS11,RPS12,RPS14,RPS15,RPS16,RPS18,RPS21,RPS24,RPS28,RPS29,AHCY,APEX1,NUDT16L1,LSM2,EXOSC7,LSM7,RPL10A,BLVRB,NTHL1,GPX1,RPL14,RPL35,RPL13A,TBRG4,ACOT7,HMOX2,UBA52,UBB,UBC,TRIR,EXOSC4,RPL36,POR,PPP2R1A,PSMA7,PSMB2,PSMB3,PSMB6,PSMB7,PSMC3,PSMC4,PSMC5,PSMD3,PSMD7,PSMD8,EXOSC5,…
GO: Biological Process	GO:0043603	cellular amide metabolic process	1.631e-27	7.886e-24	3.429e-25	3.107e-24	107	1225	RPL26,RPL27,RPL30,RPL27A,RPL28,RPL29,RPL31,RPL32,RPL34,RPL36AL,RPL37,RPL37A,RPL38,RPLP0,RPLP1,RPLP2,MRPS12,RPS3,RPS4Y1,RPS5,RPS6,RPS8,MRPL51,RPS9,RPS11,RPS12,RPS14,MRPL27,RPS15,RPS16,RPS18,RPS21,RPS24,RPS28,RPS29,FARSA,FAU,RACK1,PEMT,COA3,APEH,MRPL28,GADD45GIP1,TRUB2,EEF1A1P5,ORMDL2,EIF3C,EIF3G,EIF3H,EIF3I,SOD1,GAPDH,RPL10A,EIF2B3,EIF2B2,EIF3K,TARBP2,MPV17L2,HTRA2,GPX1,GPX4,RPL14,GSS,HAGH,RPL35,R…
GO: Biological Process	GO:0046700	heterocycle catabolic process	2.402e-27	1.162e-23	4.84e-25	4.385e-24	74	616	RPL26,RPL27,RPL30,RPL27A,RPL28,RPL29,RPL31,RPL32,RPL34,RPL37,RPL37A,RPL38,RPLP0,RPLP1,RPLP2,RPS3,RPS4Y1,RPS5,RPS6,RPS8,RPS9,RPS11,RPS12,RPS14,RPS15,RPS16,RPS18,RPS21,RPS24,RPS28,RPS29,AHCY,APEX1,NUDT16L1,LSM2,EXOSC7,LSM7,RPL10A,BLVRB,NTHL1,GPX1,RPL14,RPL35,RPL13A,TBRG4,ACOT7,HMOX2,UBA52,UBB,UBC,TRIR,EXOSC4,RPL36,PPP2R1A,PSMA7,PSMB2,PSMB3,PSMB6,PSMB7,PSMC3,PSMC4,PSMC5,PSMD3,PSMD7,PSMD8,EXOSC5,PSMD…
GO: Biological Process	GO:0016071	mRNA metabolic process	3.218e-27	1.556e-23	6.223e-25	5.639e-24	90	901	RPL26,RPL27,RPL30,RPL27A,RPL28,RPL29,RPL31,RPL32,RPL34,RPL37,RPL37A,RPL38,RPLP0,RPLP1,RPLP2,RPS3,RPS4Y1,RPS5,RPS6,RPS8,RPS9,RPS11,RPS12,RPS14,RPS15,RPS16,RPS18,RPS21,RPS24,RPS28,RPS29,POLR1H,PUF60,WDR83,APEX1,NUDT16L1,TRUB2,RBMX2,LSM2,EXOSC7,SNRPD2,LSM7,RPL10A,ZMAT5,SNU13,RPL14,PRPF4,RPL35,RPL13A,LSM10,TBRG4,UBA52,UBB,UBC,TSEN34,EXOSC4,RPL36,POLR2F,POLR2H,POLR2I,POLR2L,RBM42,PAF1,THOC6,PPP2R1A,SF…
GO: Biological Process	GO:0019439	aromatic compound catabolic process	8.199e-27	3.964e-23	1.525e-24	1.382e-23	74	628	RPL26,RPL27,RPL30,RPL27A,RPL28,RPL29,RPL31,RPL32,RPL34,RPL37,RPL37A,RPL38,RPLP0,RPLP1,RPLP2,RPS3,RPS4Y1,RPS5,RPS6,RPS8,RPS9,RPS11,RPS12,RPS14,RPS15,RPS16,RPS18,RPS21,RPS24,RPS28,RPS29,AHCY,APEX1,NUDT16L1,LSM2,EXOSC7,LSM7,RPL10A,BLVRB,NTHL1,GPX1,RPL14,RPL35,RPL13A,TBRG4,ACOT7,HMOX2,UBA52,UBB,UBC,TRIR,EXOSC4,RPL36,PPP2R1A,PSMA7,PSMB2,PSMB3,PSMB6,PSMB7,PSMC3,PSMC4,PSMC5,PSMD3,PSMD7,PSMD8,EXOSC5,PSMD…
GO: Biological Process	GO:0090150	establishment of protein localization to membrane	9.396e-27	4.543e-23	1.683e-24	1.525e-23	56	355	RPL26,RPL27,RPL30,RPL27A,RPL28,RPL29,RPL31,RPL32,RPL34,RPL37,RPL37A,RPL38,RPLP0,RPLP1,RPLP2,RPS3,RPS4Y1,RPS5,RPS6,RPS8,RPS9,RPS11,RPS12,RPS14,RPS15,RPS16,RPS18,RPS21,RPS24,RPS28,RPS29,RACK1,SGTA,NSG1,INPP5K,RPL10A,RPL14,RPL35,RPL13A,UBA52,PEX16,SAMM50,TIMM22,RPL36,ROMO1,ZFAND2B,FIS1,ZDHHC4,ARPC2,TIMM13,ARFRP1,RPL7A,RPL8,RPL13,RPL18,RPL19
GO: Biological Process	GO:0044265	cellular macromolecule catabolic process	2.052e-26	9.923e-23	3.544e-24	3.211e-23	104	1201	CLPP,RPL26,RPL27,RPL30,RPL27A,RPL28,RPL29,RPL31,RPL32,RPL34,RPL37,RPL37A,RPL38,RPLP0,RPLP1,RPLP2,RPS3,RPS4Y1,RPS5,RPS6,MAEA,RPS8,RPS9,RPS11,RPS12,RPS14,RPS15,RPS16,RPS18,RPS21,RPS24,RPS28,RPS29,RACK1,SDF2,ANXA2P2,SGTA,APEX1,ANAPC11,NUDT16L1,VPS25,SIRT2,HSP90AB2P,LSM2,EXOSC7,LSM7,VPS11,AUP1,RPL10A,NSFL1C,HTRA2,ADRM1,GPX1,RPL14,RPL35,RPL13A,SNF8,TBRG4,UBE2L6,PARK7,HSPBP1,UBA52,UBB,UBC,AP2M1,AP2S1,T…
GO: Biological Process	GO:0016032	viral process	1.27e-25	6.138e-22	2.117e-23	1.918e-22	85	853	RPL26,RPL27,RPL30,RPL27A,RPL28,RPL29,RPL31,RPL32,RPL34,RPL37,RPL37A,RPL38,RPLP0,RPLP1,RPLP2,RPS3,RPS4Y1,RPS5,RPS6,RPS8,RPS9,RPS11,RPS12,RPS14,RPS15,RPS16,RPS18,RPS21,RPS24,RPS28,RPS29,RACK1,CREB3,SEC13,SLC25A4,SLC25A5,SLC25A6,NELFCD,ANXA2P2,SGTA,SIVA1,GADD45GIP1,DYNLL1,EIF3G,INPP5K,CHMP2A,BANF1,RPL10A,AP1M1,COPS6,TARBP2,RPL14,RPL35,RPL13A,SNF8,CFL1,UBA52,UBB,UBC,AP2M1,AP2S1,COPS7B,RPL36,POLR2F,PO…
GO: Biological Process	GO:0044403	symbiotic process	1.426e-25	6.893e-22	2.298e-23	2.082e-22	88	911	RPL26,RPL27,RPL30,RPL27A,RPL28,RPL29,RPL31,RPL32,RPL34,RPL37,RPL37A,RPL38,RPLP0,RPLP1,RPLP2,RPS3,RPS4Y1,RPS5,RPS6,RPS8,RPS9,RPS11,RPS12,RPS14,RPS15,RPS16,RPS18,RPS21,RPS24,RPS28,RPS29,RACK1,CREB3,SEC13,SLC25A4,SLC25A5,SLC25A6,NELFCD,ANXA2P2,SGTA,SIVA1,GADD45GIP1,DYNLL1,EIF3G,GAPDH,INPP5K,CHMP2A,BANF1,RPL10A,AP1M1,COPS6,TARBP2,GPX1,RPL14,RPL35,RPL13A,SNF8,CFL1,UBA52,UBB,UBC,AP2M1,AP2S1,COPS7B,RPL3…
GO: Biological Process	GO:0009057	macromolecule catabolic process	2.45e-25	1.185e-21	3.821e-23	3.463e-22	114	1453	CLPP,RPL26,RPL27,RPL30,RPL27A,RPL28,RPL29,RPL31,RPL32,RPL34,RPL37,RPL37A,RPL38,RPLP0,RPLP1,RPLP2,RPS3,RPS4Y1,RPS5,RPS6,MAEA,RPS8,RPS9,RPS11,RPS12,RPS14,RPS15,RPS16,RPS18,RPS21,RPS24,RPS28,RPS29,RACK1,MAD2L2,SDF2,ANXA2P2,SGTA,APEX1,ANAPC11,NUDT16L1,VPS25,SIRT2,HSP90AB2P,LSM2,EXOSC7,LSM7,VPS11,AUP1,USE1,RPL10A,ATG4B,NSFL1C,HTRA2,ADRM1,GPX1,OAZ1,RPL14,RPL35,RPL13A,SNF8,TBRG4,UBE2L6,LYPLA2,PARK7,HSPB…
GO: Biological Process	GO:1901361	organic cyclic compound catabolic process	3.957e-25	1.913e-21	5.978e-23	5.417e-22	74	668	RPL26,RPL27,RPL30,RPL27A,RPL28,RPL29,RPL31,RPL32,RPL34,RPL37,RPL37A,RPL38,RPLP0,RPLP1,RPLP2,RPS3,RPS4Y1,RPS5,RPS6,RPS8,RPS9,RPS11,RPS12,RPS14,RPS15,RPS16,RPS18,RPS21,RPS24,RPS28,RPS29,AHCY,APEX1,NUDT16L1,LSM2,EXOSC7,LSM7,RPL10A,BLVRB,NTHL1,GPX1,RPL14,RPL35,RPL13A,TBRG4,ACOT7,HMOX2,UBA52,UBB,UBC,TRIR,EXOSC4,RPL36,PPP2R1A,PSMA7,PSMB2,PSMB3,PSMB6,PSMB7,PSMC3,PSMC4,PSMC5,PSMD3,PSMD7,PSMD8,EXOSC5,PSMD…
GO: Biological Process	GO:0044419	interspecies interaction between organisms	1.34e-24	6.477e-21	1.963e-22	1.778e-21	89	960	RPL26,RPL27,RPL30,RPL27A,RPL28,RPL29,RPL31,RPL32,RPL34,RPL37,RPL37A,RPL38,RPLP0,RPLP1,RPLP2,RPS3,RPS4Y1,RPS5,RPS6,RPS8,RPS9,RPS11,RPS12,RPS14,RPS15,RPS16,RPS18,RPS21,RPS24,RPS28,RPS29,RACK1,CREB3,SEC13,SLC25A4,SLC25A5,SLC25A6,NELFCD,ANXA2P2,SGTA,SIVA1,GADD45GIP1,DYNLL1,EIF3G,GAPDH,INPP5K,CHMP2A,BANF1,RPL10A,AP1M1,COPS6,TARBP2,GPX1,RPL14,RPL35,RPL13A,SNF8,CFL1,UBA52,UBB,UBC,AP2M1,AP2S1,COPS7B,RPL3…
GO: Biological Process	GO:0006886	intracellular protein transport	2.996e-21	1.448e-17	4.243e-19	3.845e-18	110	1536	RPL26,RPL27,RPL30,RPL27A,RPL28,RPL29,RPL31,RPL32,RPL34,RPL37,RPL37A,RPL38,RPLP0,RPLP1,RPLP2,RPS3,RPS4Y1,RPS5,RPS6,RPS8,RPS9,RPS11,RPS12,RPS14,RPS15,RPS16,RPS18,RPS21,RPS24,RPS28,RPS29,IFT43,SEC13,SLC25A6,RPAIN,SGTA,TMEM138,VPS25,MON1A,NXT1,NSG1,TIMM50,DYNLL1,VPS11,AUP1,INPP5K,RPL10A,PMPCA,AP1M1,ERP29,HTRA2,OAZ1,RPL14,AIP,TMED3,PKIG,ATP6V0D1,RPL35,RPL13A,DCTN3,SNF8,CETN2,CFL1,PARK7,PHB2,ARFIP2,TXN…
GO: Biological Process	GO:0033365	protein localization to organelle	3.071e-21	1.485e-17	4.243e-19	3.845e-18	104	1400	RPL26,RPL27,RPL30,RPL27A,RPL28,RPL29,RPL31,RPL32,RPL34,RPL37,RPL37A,RPL38,RPLP0,RPLP1,RPLP2,RPS3,RPS4Y1,RPS5,RPS6,RPS8,RPS9,RPS11,RPS12,RPS14,RPS15,RPS16,RPS18,RPS21,RPS24,RPS28,RPS29,IFT43,MCRS1,CENPT,SLC25A6,RPAIN,SGTA,TMEM138,CCT7,VPS25,MON1A,SIRT2,RUVBL1,CCT5,NXT1,TIMM50,DYNLL1,VPS11,CENPX,RUVBL2,RPL10A,NSFL1C,PMPCA,HTRA2,RPL14,AIP,PKIG,ATP6V0D1,RPL35,RPL13A,DCTN3,SNF8,CETN2,CFL1,PARK7,PHB2,T…
GO: Biological Process	GO:0009206	purine ribonucleoside triphosphate biosynthetic process	4.145e-19	2.004e-15	5.567e-17	5.044e-16	35	193	UQCRHL,ATP5F1EP2,STOML2,GADD45GIP1,UQCC3,ATP5F1A,ATP5F1B,ATP5MC2,ATP5ME,ATP5PO,NDUFA8,NDUFB2,NDUFB7,NDUFB8,NDUFB9,NDUFB10,NDUFS3,NDUFV1,NDUFS5,NDUFS8,NDUFV3,NME1,UQCRFS1P1,NME2P1,PARK7,PKM,UQCRC1,UQCRH,NDUFB11,COX4I1,COX6B1,ATP5MF,NDUFS7,SDHAF2,ENO1
GO: Biological Process	GO:0009145	purine nucleoside triphosphate biosynthetic process	4.931e-19	2.384e-15	6.443e-17	5.838e-16	35	194	UQCRHL,ATP5F1EP2,STOML2,GADD45GIP1,UQCC3,ATP5F1A,ATP5F1B,ATP5MC2,ATP5ME,ATP5PO,NDUFA8,NDUFB2,NDUFB7,NDUFB8,NDUFB9,NDUFB10,NDUFS3,NDUFV1,NDUFS5,NDUFS8,NDUFV3,NME1,UQCRFS1P1,NME2P1,PARK7,PKM,UQCRC1,UQCRH,NDUFB11,COX4I1,COX6B1,ATP5MF,NDUFS7,SDHAF2,ENO1
GO: Biological Process	GO:0042254	ribosome biogenesis	5.917e-19	2.861e-15	7.529e-17	6.822e-16	43	303	POP7,RPL26,RPL27,RPL38,RPLP0,RPS5,RPS6,RPS8,RPS9,RPS14,RPS15,RPS16,RPS21,RPS24,RPS28,NOP10,NOP56,ZNF622,NHP2,NSUN5,RPUSD2,EXOSC7,RPL10A,IMP4,SNU13,EBNA1BP2,MPV17L2,RPL14,RPL35,EXOSC4,DDX49,DDX56,MRPS11,RPLP0P6,EXOSC5,EIF6,ERAL1,PIH1D1,MRPL20,MRPS2,RPL26L1,MRTO4,RPL7A
GO: Biological Process	GO:0022613	ribonucleoprotein complex biogenesis	6.62e-19	3.201e-15	8.207e-17	7.436e-16	56	512	POP7,RPL26,RPL27,RPL38,RPLP0,RPS5,RPS6,RPS8,RPS9,RPS14,RPS15,RPS16,RPS21,RPS24,RPS28,NOP10,NOP56,ZNF622,NHP2,NSUN5,RUVBL1,RPUSD2,EIF3C,EIF3G,LSM2,EIF3H,EIF3I,EXOSC7,SNRPD2,RUVBL2,RPL10A,IMP4,EIF3K,SNU13,EBNA1BP2,TARBP2,MPV17L2,RPL14,RPL35,RPL13A,EXOSC4,DDX49,DDX56,MRPS11,RPLP0P6,EXOSC5,EIF6,EIF3CL,ERAL1,PIH1D1,MRPL20,PQBP1,MRPS2,RPL26L1,MRTO4,RPL7A
GO: Biological Process	GO:0009201	ribonucleoside triphosphate biosynthetic process	1.155e-18	5.586e-15	1.397e-16	1.265e-15	35	199	UQCRHL,ATP5F1EP2,STOML2,GADD45GIP1,UQCC3,ATP5F1A,ATP5F1B,ATP5MC2,ATP5ME,ATP5PO,NDUFA8,NDUFB2,NDUFB7,NDUFB8,NDUFB9,NDUFB10,NDUFS3,NDUFV1,NDUFS5,NDUFS8,NDUFV3,NME1,UQCRFS1P1,NME2P1,PARK7,PKM,UQCRC1,UQCRH,NDUFB11,COX4I1,COX6B1,ATP5MF,NDUFS7,SDHAF2,ENO1
GO: Biological Process	GO:0072657	protein localization to membrane	1.541e-18	7.449e-15	1.817e-16	1.646e-15	65	686	RPL26,RPL27,RPL30,RPL27A,RPL28,RPL29,RPL31,RPL32,RPL34,RPL37,RPL37A,RPL38,RPLP0,RPLP1,RPLP2,RPS3,RPS4Y1,RPS5,RPS6,RPS8,RPS9,ACTB,RPS11,RPS12,RPS14,RPS15,RPS16,RPS18,RPS21,RPS24,RPS28,RPS29,RACK1,FLOT2,ANXA2P2,SGTA,NSG1,INPP5K,RPL10A,LIN7B,BSG,RPL14,RPL35,RPL13A,UBA52,AP2M1,PEX16,SAMM50,TIMM22,PICK1,STX8,RPL36,PRKCZ,ROMO1,ZFAND2B,FIS1,ZDHHC4,ARPC2,TIMM13,ARFRP1,RPL7A,RPL8,RPL13,RPL18,RPL19
GO: Biological Process	GO:0002181	cytoplasmic translation	2.234e-18	1.08e-14	2.571e-16	2.33e-15	26	102	RPL26,RPL30,RPL29,RPL31,RPL32,RPL38,RPLP0,RPLP1,RPS21,RPS28,RPS29,EIF3C,EIF3G,EIF3H,EIF3I,RPL10A,EIF3K,RPL13A,RPL36,RPLP0P6,EIF3CL,DRG2,RPL26L1,RPL8,RPL18,RPL19
GO: Biological Process	GO:0009144	purine nucleoside triphosphate metabolic process	2.289e-18	1.107e-14	2.574e-16	2.332e-15	36	216	UQCRHL,ATP5F1EP2,STOML2,GADD45GIP1,UQCC3,ATP5F1A,ATP5F1B,ATP5MC2,ATP5ME,ATP5PO,NDUFA8,NDUFB2,NDUFB7,NDUFB8,NDUFB9,NDUFB10,NDUFS3,NDUFV1,NDUFS5,NDUFS8,NDUFV3,NME1,UQCRFS1P1,NME2P1,GUK1,PARK7,PKM,UQCRC1,UQCRH,NDUFB11,COX4I1,COX6B1,ATP5MF,NDUFS7,SDHAF2,ENO1
GO: Biological Process	GO:0015986	ATP synthesis coupled proton transport	2.908e-18	1.406e-14	3.125e-16	2.831e-15	31	156	UQCRHL,ATP5F1EP2,STOML2,GADD45GIP1,UQCC3,ATP5F1A,ATP5F1B,ATP5MC2,ATP5ME,ATP5PO,NDUFA8,NDUFB2,NDUFB7,NDUFB8,NDUFB9,NDUFB10,NDUFS3,NDUFV1,NDUFS5,NDUFS8,NDUFV3,UQCRFS1P1,PARK7,UQCRC1,UQCRH,NDUFB11,COX4I1,COX6B1,ATP5MF,NDUFS7,SDHAF2
GO: Biological Process	GO:0015985	energy coupled proton transport, down electrochemical gradient	2.908e-18	1.406e-14	3.125e-16	2.831e-15	31	156	UQCRHL,ATP5F1EP2,STOML2,GADD45GIP1,UQCC3,ATP5F1A,ATP5F1B,ATP5MC2,ATP5ME,ATP5PO,NDUFA8,NDUFB2,NDUFB7,NDUFB8,NDUFB9,NDUFB10,NDUFS3,NDUFV1,NDUFS5,NDUFS8,NDUFV3,UQCRFS1P1,PARK7,UQCRC1,UQCRH,NDUFB11,COX4I1,COX6B1,ATP5MF,NDUFS7,SDHAF2
GO: Biological Process	GO:0007005	mitochondrion organization	3.338e-18	1.614e-14	3.508e-16	3.179e-15	58	566	ECSIT,FANCG,MAP1LC3B2,ALAS1,STOML2,FOXRED1,COA3,SLC25A4,SLC25A5,SLC25A6,ALKBH7,SIVA1,CHCHD6,UQCC3,TIMM50,ATP5F1A,ATP5F1B,ATP5MC2,ATP5ME,VPS11,ATP5PO,SPG7,NDUFA8,NDUFB2,BCS1L,NDUFB7,NDUFB8,NDUFB9,NDUFB10,NDUFS3,NDUFV1,NDUFS5,NDUFS8,NDUFV3,TMEM11,PMPCA,HTRA2,GPX1,AIP,WDR45,HSD17B10,PARK7,PHB2,PHB,SAMM50,TIMM22,NDUFB11,TOMM7,NDUFAF3,ATP5MF,ROMO1,NDUFS7,SDHAF2,DMAC2,FIS1,RHOT2,TIMM13,TIMM8B
GO: Biological Process	GO:0009205	purine ribonucleoside triphosphate metabolic process	3.64e-18	1.76e-14	3.708e-16	3.359e-15	35	206	UQCRHL,ATP5F1EP2,STOML2,GADD45GIP1,UQCC3,ATP5F1A,ATP5F1B,ATP5MC2,ATP5ME,ATP5PO,NDUFA8,NDUFB2,NDUFB7,NDUFB8,NDUFB9,NDUFB10,NDUFS3,NDUFV1,NDUFS5,NDUFS8,NDUFV3,NME1,UQCRFS1P1,NME2P1,PARK7,PKM,UQCRC1,UQCRH,NDUFB11,COX4I1,COX6B1,ATP5MF,NDUFS7,SDHAF2,ENO1
GO: Biological Process	GO:0006754	ATP biosynthetic process	3.681e-18	1.78e-14	3.708e-16	3.359e-15	33	181	UQCRHL,ATP5F1EP2,STOML2,GADD45GIP1,UQCC3,ATP5F1A,ATP5F1B,ATP5MC2,ATP5ME,ATP5PO,NDUFA8,NDUFB2,NDUFB7,NDUFB8,NDUFB9,NDUFB10,NDUFS3,NDUFV1,NDUFS5,NDUFS8,NDUFV3,UQCRFS1P1,PARK7,PKM,UQCRC1,UQCRH,NDUFB11,COX4I1,COX6B1,ATP5MF,NDUFS7,SDHAF2,ENO1
GO: Biological Process	GO:0009142	nucleoside triphosphate biosynthetic process	6.861e-18	3.317e-14	6.77e-16	6.134e-15	35	210	UQCRHL,ATP5F1EP2,STOML2,GADD45GIP1,UQCC3,ATP5F1A,ATP5F1B,ATP5MC2,ATP5ME,ATP5PO,NDUFA8,NDUFB2,NDUFB7,NDUFB8,NDUFB9,NDUFB10,NDUFS3,NDUFV1,NDUFS5,NDUFS8,NDUFV3,NME1,UQCRFS1P1,NME2P1,PARK7,PKM,UQCRC1,UQCRH,NDUFB11,COX4I1,COX6B1,ATP5MF,NDUFS7,SDHAF2,ENO1
GO: Biological Process	GO:0009199	ribonucleoside triphosphate metabolic process	1.093e-17	5.283e-14	1.057e-15	9.573e-15	35	213	UQCRHL,ATP5F1EP2,STOML2,GADD45GIP1,UQCC3,ATP5F1A,ATP5F1B,ATP5MC2,ATP5ME,ATP5PO,NDUFA8,NDUFB2,NDUFB7,NDUFB8,NDUFB9,NDUFB10,NDUFS3,NDUFV1,NDUFS5,NDUFS8,NDUFV3,NME1,UQCRFS1P1,NME2P1,PARK7,PKM,UQCRC1,UQCRH,NDUFB11,COX4I1,COX6B1,ATP5MF,NDUFS7,SDHAF2,ENO1
GO: Biological Process	GO:0006119	oxidative phosphorylation	1.524e-17	7.369e-14	1.445e-15	1.309e-14	30	153	UQCRHL,STOML2,GADD45GIP1,UQCC3,ATP5F1A,ATP5F1B,ATP5MC2,ATP5ME,ATP5PO,NDUFA8,NDUFB2,NDUFB7,NDUFB8,NDUFB9,NDUFB10,NDUFS3,NDUFV1,NDUFS5,NDUFS8,NDUFV3,UQCRFS1P1,PARK7,UQCRC1,UQCRH,NDUFB11,COX4I1,COX6B1,ATP5MF,NDUFS7,SDHAF2
GO: Biological Process	GO:0046034	ATP metabolic process	7.866e-17	3.803e-13	7.314e-15	6.627e-14	42	329	ALDOC,UQCRHL,ATP5F1EP2,STOML2,SEC13,GADD45GIP1,UQCC3,ATP5F1A,ATP5F1B,ATP5MC2,ATP5ME,ATP5PO,GAPDH,NDUFA8,NDUFB2,NDUFB7,NDUFB8,NDUFB9,NDUFB10,NDUFS3,NDUFV1,NDUFS5,NDUFS8,NDUFV3,UQCRFS1P1,GUK1,SLC2A6,TPI1,PARK7,PFKM,PGAM4,PKM,UQCRC1,UQCRH,NDUFB11,COX4I1,COX6B1,ATP5MF,NDUFS7,EIF6,SDHAF2,ENO1
GO: Biological Process	GO:0009141	nucleoside triphosphate metabolic process	8.791e-17	4.25e-13	8.019e-15	7.266e-14	36	241	UQCRHL,ATP5F1EP2,STOML2,GADD45GIP1,UQCC3,ATP5F1A,ATP5F1B,ATP5MC2,ATP5ME,ATP5PO,NDUFA8,NDUFB2,NDUFB7,NDUFB8,NDUFB9,NDUFB10,NDUFS3,NDUFV1,NDUFS5,NDUFS8,NDUFV3,NME1,UQCRFS1P1,NME2P1,GUK1,PARK7,PKM,UQCRC1,UQCRH,NDUFB11,COX4I1,COX6B1,ATP5MF,NDUFS7,SDHAF2,ENO1
GO: Biological Process	GO:0034622	cellular protein-containing complex assembly	1.995e-16	9.644e-13	1.786e-14	1.618e-13	89	1277	RPL38,RPLP0,RPS3,RPS5,RPS14,RPS15,RPS28,ECSIT,NOP10,PFDN6,FOXRED1,CENPT,COA3,CCT7,NHP2,MSRB2,SIRT2,RUVBL1,CCT5,UQCC3,NSG1,EIF3C,EIF3G,LSM2,EIF3H,EIF3I,SNRPD2,VPS11,ATP6AP1,BRK1,CENPX,NDUFA8,NDUFB2,RUVBL2,BCS1L,NDUFB7,NDUFB8,NDUFB9,CHMP2A,NDUFB10,NDUFS3,NDUFV1,NDUFS5,NDUFS8,NDUFV3,EIF3K,SNU13,MLST8,TARBP2,MPV17L2,ADRM1,GPX4,CORO1A,TMSB10,RPL13A,CETN2,CFL1,TWF2,UBA52,UBB,UBC,AP2M1,AP2S1,PIN1,CLTA,C…
GO: Biological Process	GO:0034470	ncRNA processing	1.325e-15	6.404e-12	1.164e-13	1.055e-12	44	389	POP7,RPL26,RPL27,CTU2,RPS6,RPS8,RPS9,RPS14,RPS15,RPS16,LAGE3,RPS21,RPS24,RPS28,NOP10,NOP56,TRMT1,NHP2,TRUB2,NSUN5,RPUSD2,EXOSC7,RPL10A,MOCS3,IMP4,SNU13,EBNA1BP2,TARBP2,RPL14,HSD17B10,RPL35,TSEN34,EXOSC4,DDX49,DDX56,MRPS11,RNF113A,EXOSC5,INTS11,URM1,PIH1D1,MRTO4,QTRT1,RPL7A
GO: Biological Process	GO:1902600	proton transmembrane transport	1.491e-15	7.207e-12	1.287e-13	1.166e-12	37	278	UQCRHL,ATP5F1EP2,STOML2,SLC25A4,GADD45GIP1,UQCC3,ATP5F1A,ATP5F1B,ATP5MC2,ATP5ME,ATP6V0B,ATP6AP1,ATP5PO,NDUFA8,NDUFB2,NDUFB7,NDUFB8,NDUFB9,NDUFB10,NDUFS3,NDUFV1,NDUFS5,NDUFS8,NDUFV3,UQCRFS1P1,ATP6V0D1,SLC2A6,PARK7,PHB2,UQCRC1,UQCRH,NDUFB11,COX4I1,COX6B1,ATP5MF,NDUFS7,SDHAF2
GO: Biological Process	GO:0034660	ncRNA metabolic process	2.178e-15	1.053e-11	1.848e-13	1.674e-12	49	482	POP7,RPL26,RPL27,CTU2,RPS6,RPS8,RPS9,RPS14,RPS15,RPS16,LAGE3,RPS21,RPS24,RPS28,FARSA,NOP10,NOP56,TRMT1,NUDT16L1,NHP2,TRUB2,NSUN5,RPUSD2,EXOSC7,RPL10A,MOCS3,IMP4,SNU13,EBNA1BP2,TARBP2,RPL14,HSD17B10,RPL35,TRIR,TSEN34,EXOSC4,DDX49,DDX56,MRPS11,RNF113A,EXOSC5,INTS11,URM1,QARS1,PIH1D1,DALRD3,MRTO4,QTRT1,RPL7A
GO: Biological Process	GO:0006091	generation of precursor metabolites and energy	3.206e-15	1.55e-11	2.672e-13	2.421e-12	54	580	AKR1A1,MDH2,ALDOC,AKR1B1,UQCRHL,STOML2,SEC13,SLC25A4,GADD45GIP1,UQCC3,ATP5F1A,ATP5F1B,ATP5MC2,ATP5ME,ATP5PO,GAPDH,INPP5K,NDUFA8,NDUFB2,NDUFB7,NDUFB8,NDUFB9,NDUFB10,NDUFS3,NDUFV1,NDUFS5,NDUFS8,NDUFV3,TALDO1,UQCRFS1P1,TKT,SLC2A6,TPI1,TBRG4,PARK7,PHB2,PFKM,PGAM4,PKM,UQCRC1,UQCRH,NDUFB11,COX4I1,COX6B1,POR,ATP5MF,IDH3B,IDH3G,PPP1CA,NDUFS7,EIF6,SDHAF2,CIAPIN1,ENO1
GO: Biological Process	GO:0009152	purine ribonucleotide biosynthetic process	4.938e-15	2.387e-11	4.046e-13	3.666e-12	39	320	UQCRHL,ATP5F1EP2,STOML2,APRT,GADD45GIP1,UQCC3,ATP5F1A,ATP5F1B,ATP5MC2,ATP5ME,ATP5PO,NDUFA8,NDUFB2,NDUFB7,NDUFB8,NDUFB9,NDUFB10,NDUFS3,NDUFV1,NDUFS5,NDUFS8,NDUFV3,NME1,UQCRFS1P1,NME2P1,GUK1,PARK7,ACOT7,PKM,UQCRC1,UQCRH,NDUFB11,COX4I1,COX6B1,ELOVL1,ATP5MF,NDUFS7,SDHAF2,ENO1
GO: Biological Process	GO:0016072	rRNA metabolic process	5.086e-15	2.459e-11	4.098e-13	3.713e-12	33	229	POP7,RPL26,RPL27,RPS6,RPS8,RPS9,RPS14,RPS15,RPS16,RPS21,RPS24,RPS28,NOP10,NOP56,NHP2,NSUN5,RPUSD2,EXOSC7,RPL10A,IMP4,SNU13,EBNA1BP2,RPL14,RPL35,TRIR,EXOSC4,DDX49,DDX56,MRPS11,EXOSC5,PIH1D1,MRTO4,RPL7A
GO: Biological Process	GO:0046390	ribose phosphate biosynthetic process	6.572e-15	3.177e-11	5.209e-13	4.72e-12	40	339	UQCRHL,ATP5F1EP2,STOML2,APRT,GADD45GIP1,UQCC3,ATP5F1A,ATP5F1B,ATP5MC2,ATP5ME,ATP5PO,NDUFA8,NDUFB2,NDUFB7,NDUFB8,NDUFB9,NDUFB10,NDUFS3,NDUFV1,NDUFS5,NDUFS8,NDUFV3,NME1,UQCRFS1P1,NME2P1,GUK1,TKT,PARK7,ACOT7,PKM,UQCRC1,UQCRH,NDUFB11,COX4I1,COX6B1,ELOVL1,ATP5MF,NDUFS7,SDHAF2,ENO1
GO: Biological Process	GO:0006364	rRNA processing	6.818e-15	3.296e-11	5.317e-13	4.817e-12	32	217	POP7,RPL26,RPL27,RPS6,RPS8,RPS9,RPS14,RPS15,RPS16,RPS21,RPS24,RPS28,NOP10,NOP56,NHP2,NSUN5,RPUSD2,EXOSC7,RPL10A,IMP4,SNU13,EBNA1BP2,RPL14,RPL35,EXOSC4,DDX49,DDX56,MRPS11,EXOSC5,PIH1D1,MRTO4,RPL7A
GO: Biological Process	GO:0006164	purine nucleotide biosynthetic process	9.17e-15	4.434e-11	7.037e-13	6.376e-12	39	326	UQCRHL,ATP5F1EP2,STOML2,APRT,GADD45GIP1,UQCC3,ATP5F1A,ATP5F1B,ATP5MC2,ATP5ME,ATP5PO,NDUFA8,NDUFB2,NDUFB7,NDUFB8,NDUFB9,NDUFB10,NDUFS3,NDUFV1,NDUFS5,NDUFS8,NDUFV3,NME1,UQCRFS1P1,NME2P1,GUK1,PARK7,ACOT7,PKM,UQCRC1,UQCRH,NDUFB11,COX4I1,COX6B1,ELOVL1,ATP5MF,NDUFS7,SDHAF2,ENO1
GO: Biological Process	GO:0033108	mitochondrial respiratory chain complex assembly	1.334e-14	6.449e-11	1.008e-12	9.131e-12	22	97	ECSIT,FOXRED1,COA3,UQCC3,NDUFA8,NDUFB2,BCS1L,NDUFB7,NDUFB8,NDUFB9,NDUFB10,NDUFS3,NDUFV1,NDUFS5,NDUFS8,NDUFV3,SAMM50,NDUFB11,NDUFAF3,NDUFS7,SDHAF2,DMAC2
GO: Biological Process	GO:0009260	ribonucleotide biosynthetic process	1.853e-14	8.957e-11	1.378e-12	1.249e-11	39	333	UQCRHL,ATP5F1EP2,STOML2,APRT,GADD45GIP1,UQCC3,ATP5F1A,ATP5F1B,ATP5MC2,ATP5ME,ATP5PO,NDUFA8,NDUFB2,NDUFB7,NDUFB8,NDUFB9,NDUFB10,NDUFS3,NDUFV1,NDUFS5,NDUFS8,NDUFV3,NME1,UQCRFS1P1,NME2P1,GUK1,PARK7,ACOT7,PKM,UQCRC1,UQCRH,NDUFB11,COX4I1,COX6B1,ELOVL1,ATP5MF,NDUFS7,SDHAF2,ENO1
GO: Biological Process	GO:0042775	mitochondrial ATP synthesis coupled electron transport	2.627e-14	1.27e-10	1.925e-12	1.744e-11	22	100	UQCRHL,UQCC3,NDUFA8,NDUFB2,NDUFB7,NDUFB8,NDUFB9,NDUFB10,NDUFS3,NDUFV1,NDUFS5,NDUFS8,NDUFV3,UQCRFS1P1,PARK7,UQCRC1,UQCRH,NDUFB11,COX4I1,COX6B1,NDUFS7,SDHAF2
GO: Biological Process	GO:0072522	purine-containing compound biosynthetic process	3.025e-14	1.463e-10	2.183e-12	1.978e-11	39	338	UQCRHL,ATP5F1EP2,STOML2,APRT,GADD45GIP1,UQCC3,ATP5F1A,ATP5F1B,ATP5MC2,ATP5ME,ATP5PO,NDUFA8,NDUFB2,NDUFB7,NDUFB8,NDUFB9,NDUFB10,NDUFS3,NDUFV1,NDUFS5,NDUFS8,NDUFV3,NME1,UQCRFS1P1,NME2P1,GUK1,PARK7,ACOT7,PKM,UQCRC1,UQCRH,NDUFB11,COX4I1,COX6B1,ELOVL1,ATP5MF,NDUFS7,SDHAF2,ENO1
GO: Biological Process	GO:0042773	ATP synthesis coupled electron transport	3.274e-14	1.583e-10	2.328e-12	2.11e-11	22	101	UQCRHL,UQCC3,NDUFA8,NDUFB2,NDUFB7,NDUFB8,NDUFB9,NDUFB10,NDUFS3,NDUFV1,NDUFS5,NDUFS8,NDUFV3,UQCRFS1P1,PARK7,UQCRC1,UQCRH,NDUFB11,COX4I1,COX6B1,NDUFS7,SDHAF2
GO: Biological Process	GO:0032981	mitochondrial respiratory chain complex I assembly	8.159e-14	3.945e-10	5.635e-12	5.106e-11	18	65	ECSIT,FOXRED1,NDUFA8,NDUFB2,BCS1L,NDUFB7,NDUFB8,NDUFB9,NDUFB10,NDUFS3,NDUFV1,NDUFS5,NDUFS8,NDUFV3,NDUFB11,NDUFAF3,NDUFS7,DMAC2
GO: Biological Process	GO:0010257	NADH dehydrogenase complex assembly	8.159e-14	3.945e-10	5.635e-12	5.106e-11	18	65	ECSIT,FOXRED1,NDUFA8,NDUFB2,BCS1L,NDUFB7,NDUFB8,NDUFB9,NDUFB10,NDUFS3,NDUFV1,NDUFS5,NDUFS8,NDUFV3,NDUFB11,NDUFAF3,NDUFS7,DMAC2
GO: Biological Process	GO:0070125	mitochondrial translational elongation	2.585e-13	1.25e-09	1.76e-11	1.595e-10	20	89	MRPS12,MRPL51,MRPL27,MRPL28,GADD45GIP1,TUFM,MRPL55,MRPL14,MRPS26,MRPS11,MRPL41,MRPL40,ERAL1,MRPL20,MRPL54,MRPL52,MRPL2,MRPS18A,MRPL4,MRPS2
GO: Biological Process	GO:0072521	purine-containing compound metabolic process	4.632e-13	2.24e-09	3.11e-11	2.818e-10	52	614	PEMT,AHCY,ALDOC,UQCRHL,ATP5F1EP2,STOML2,SEC13,APRT,GADD45GIP1,UQCC3,ATP5F1A,ATP5F1B,ATP5MC2,ATP5ME,ATP5PO,GAPDH,NDUFA8,NDUFB2,NDUFB7,NDUFB8,NDUFB9,NDUFB10,NDUFS3,NDUFV1,NDUFS5,NDUFS8,NDUFV3,NME1,UQCRFS1P1,GPX1,NME2P1,GUK1,SLC2A6,TPI1,PARK7,ACOT7,PFKM,PGAM4,PKM,UQCRC1,UQCRH,NDUFB11,COX4I1,COX6B1,ELOVL1,ATP5MF,NDUFS7,DBI,EIF6,SDHAF2,ACOT8,ENO1
GO: Biological Process	GO:0006415	translational termination	6.14e-13	2.969e-09	4.067e-11	3.685e-10	21	104	MRPS12,MRPL51,MRPL27,APEH,MRPL28,GADD45GIP1,MRPL55,MRPL14,MRPS26,C12orf65,MRPS11,MRPL41,MRPL40,ERAL1,MRPL20,MRPL54,MRPL52,MRPL2,MRPS18A,MRPL4,MRPS2
GO: Biological Process	GO:0006163	purine nucleotide metabolic process	6.893e-13	3.333e-09	4.504e-11	4.081e-10	50	580	ALDOC,UQCRHL,ATP5F1EP2,STOML2,SEC13,APRT,GADD45GIP1,UQCC3,ATP5F1A,ATP5F1B,ATP5MC2,ATP5ME,ATP5PO,GAPDH,NDUFA8,NDUFB2,NDUFB7,NDUFB8,NDUFB9,NDUFB10,NDUFS3,NDUFV1,NDUFS5,NDUFS8,NDUFV3,NME1,UQCRFS1P1,GPX1,NME2P1,GUK1,SLC2A6,TPI1,PARK7,ACOT7,PFKM,PGAM4,PKM,UQCRC1,UQCRH,NDUFB11,COX4I1,COX6B1,ELOVL1,ATP5MF,NDUFS7,DBI,EIF6,SDHAF2,ACOT8,ENO1
GO: Biological Process	GO:0009150	purine ribonucleotide metabolic process	7.312e-13	3.536e-09	4.714e-11	4.271e-10	49	561	ALDOC,UQCRHL,ATP5F1EP2,STOML2,SEC13,APRT,GADD45GIP1,UQCC3,ATP5F1A,ATP5F1B,ATP5MC2,ATP5ME,ATP5PO,GAPDH,NDUFA8,NDUFB2,NDUFB7,NDUFB8,NDUFB9,NDUFB10,NDUFS3,NDUFV1,NDUFS5,NDUFS8,NDUFV3,NME1,UQCRFS1P1,NME2P1,GUK1,SLC2A6,TPI1,PARK7,ACOT7,PFKM,PGAM4,PKM,UQCRC1,UQCRH,NDUFB11,COX4I1,COX6B1,ELOVL1,ATP5MF,NDUFS7,DBI,EIF6,SDHAF2,ACOT8,ENO1
GO: Biological Process	GO:0019693	ribose phosphate metabolic process	9.516e-13	4.601e-09	6.054e-11	5.485e-10	50	585	ALDOC,UQCRHL,ATP5F1EP2,STOML2,SEC13,APRT,GADD45GIP1,UQCC3,ATP5F1A,ATP5F1B,ATP5MC2,ATP5ME,ATP5PO,GAPDH,NDUFA8,NDUFB2,NDUFB7,NDUFB8,NDUFB9,NDUFB10,NDUFS3,NDUFV1,NDUFS5,NDUFS8,NDUFV3,NME1,UQCRFS1P1,NME2P1,GUK1,TKT,SLC2A6,TPI1,PARK7,ACOT7,PFKM,PGAM4,PKM,UQCRC1,UQCRH,NDUFB11,COX4I1,COX6B1,ELOVL1,ATP5MF,NDUFS7,DBI,EIF6,SDHAF2,ACOT8,ENO1
GO: Biological Process	GO:0022900	electron transport chain	1.623e-12	7.845e-09	1.019e-10	9.232e-10	28	202	AKR1A1,AKR1B1,UQCRHL,UQCC3,NDUFA8,NDUFB2,NDUFB7,NDUFB8,NDUFB9,NDUFB10,NDUFS3,NDUFV1,NDUFS5,NDUFS8,NDUFV3,UQCRFS1P1,PARK7,PHB2,UQCRC1,UQCRH,NDUFB11,COX4I1,COX6B1,POR,IDH3B,NDUFS7,SDHAF2,CIAPIN1
GO: Biological Process	GO:0009259	ribonucleotide metabolic process	1.935e-12	9.354e-09	1.199e-10	1.087e-09	49	576	ALDOC,UQCRHL,ATP5F1EP2,STOML2,SEC13,APRT,GADD45GIP1,UQCC3,ATP5F1A,ATP5F1B,ATP5MC2,ATP5ME,ATP5PO,GAPDH,NDUFA8,NDUFB2,NDUFB7,NDUFB8,NDUFB9,NDUFB10,NDUFS3,NDUFV1,NDUFS5,NDUFS8,NDUFV3,NME1,UQCRFS1P1,NME2P1,GUK1,SLC2A6,TPI1,PARK7,ACOT7,PFKM,PGAM4,PKM,UQCRC1,UQCRH,NDUFB11,COX4I1,COX6B1,ELOVL1,ATP5MF,NDUFS7,DBI,EIF6,SDHAF2,ACOT8,ENO1
GO: Biological Process	GO:0032543	mitochondrial translation	2.449e-12	1.184e-08	1.499e-10	1.358e-09	23	136	MRPS12,MRPL51,MRPL27,COA3,MRPL28,GADD45GIP1,TRUB2,MPV17L2,TUFM,MRPL55,MRPL14,MRPS26,MRPS11,MRPL41,MRPL40,ERAL1,MRPL20,MRPL54,MRPL52,MRPL2,MRPS18A,MRPL4,MRPS2
GO: Biological Process	GO:0070126	mitochondrial translational termination	2.734e-12	1.322e-08	1.652e-10	1.497e-09	19	89	MRPS12,MRPL51,MRPL27,MRPL28,GADD45GIP1,MRPL55,MRPL14,MRPS26,MRPS11,MRPL41,MRPL40,ERAL1,MRPL20,MRPL54,MRPL52,MRPL2,MRPS18A,MRPL4,MRPS2
GO: Biological Process	GO:0140053	mitochondrial gene expression	3.007e-12	1.454e-08	1.795e-10	1.626e-09	25	164	MRPS12,MRPL51,MRPL27,COA3,MRPL28,GADD45GIP1,TRUB2,MPV17L2,HSD17B10,TBRG4,TUFM,MRPL55,MRPL14,MRPS26,MRPS11,MRPL41,MRPL40,ERAL1,MRPL20,MRPL54,MRPL52,MRPL2,MRPS18A,MRPL4,MRPS2
GO: Biological Process	GO:0022904	respiratory electron transport chain	3.212e-12	1.553e-08	1.894e-10	1.716e-09	22	125	UQCRHL,UQCC3,NDUFA8,NDUFB2,NDUFB7,NDUFB8,NDUFB9,NDUFB10,NDUFS3,NDUFV1,NDUFS5,NDUFS8,NDUFV3,UQCRFS1P1,PARK7,UQCRC1,UQCRH,NDUFB11,COX4I1,COX6B1,NDUFS7,SDHAF2
GO: Biological Process	GO:1901137	carbohydrate derivative biosynthetic process	1.725e-11	8.341e-08	1.005e-09	9.106e-09	59	829	RPN1,RPN2,AKR1A1,UQCRHL,SDF2,ATP5F1EP2,STOML2,NAGK,APRT,GADD45GIP1,UQCC3,ATP5F1A,ATP5F1B,ATP5MC2,ATP5ME,ATP5PO,OST4,NDUFA8,NDUFB2,NDUFB7,NDUFB8,NDUFB9,NDUFB10,DPM2,NDUFS3,NDUFV1,NDUFS5,NDUFS8,NDUFV3,NME1,TMEM258,UQCRFS1P1,NME2P1,SERP2,GUK1,TKT,TPI1,B4GALT7,PARK7,ACOT7,PKM,UQCRC1,UQCRH,PMM1,NDUFB11,COX4I1,COX6B1,ELOVL1,ATP5MF,NDUFS7,DAD1,DDOST,SDHAF2,ACOT8,COG7,SLC35C2,DOLPP1,ENO1,DCXR
GO: Biological Process	GO:0061418	regulation of transcription from RNA polymerase II promoter in response to hypoxia	2.189e-11	1.058e-07	1.26e-09	1.142e-08	17	77	SIRT2,ELOB,UBA52,UBB,UBC,PSMA7,PSMB2,PSMB3,PSMB6,PSMB7,PSMC3,PSMC4,PSMC5,PSMD3,PSMD7,PSMD8,PSMD11
GO: Biological Process	GO:0009165	nucleotide biosynthetic process	3.553e-11	1.718e-07	2.021e-09	1.831e-08	39	423	UQCRHL,ATP5F1EP2,STOML2,APRT,GADD45GIP1,UQCC3,ATP5F1A,ATP5F1B,ATP5MC2,ATP5ME,ATP5PO,NDUFA8,NDUFB2,NDUFB7,NDUFB8,NDUFB9,NDUFB10,NDUFS3,NDUFV1,NDUFS5,NDUFS8,NDUFV3,NME1,UQCRFS1P1,NME2P1,GUK1,PARK7,ACOT7,PKM,UQCRC1,UQCRH,NDUFB11,COX4I1,COX6B1,ELOVL1,ATP5MF,NDUFS7,SDHAF2,ENO1
GO: Biological Process	GO:1901293	nucleoside phosphate biosynthetic process	4.395e-11	2.125e-07	2.471e-09	2.239e-08	39	426	UQCRHL,ATP5F1EP2,STOML2,APRT,GADD45GIP1,UQCC3,ATP5F1A,ATP5F1B,ATP5MC2,ATP5ME,ATP5PO,NDUFA8,NDUFB2,NDUFB7,NDUFB8,NDUFB9,NDUFB10,NDUFS3,NDUFV1,NDUFS5,NDUFS8,NDUFV3,NME1,UQCRFS1P1,NME2P1,GUK1,PARK7,ACOT7,PKM,UQCRC1,UQCRH,NDUFB11,COX4I1,COX6B1,ELOVL1,ATP5MF,NDUFS7,SDHAF2,ENO1
GO: Biological Process	GO:0009117	nucleotide metabolic process	4.693e-11	2.269e-07	2.591e-09	2.347e-08	52	694	ALDOC,UQCRHL,ATP5F1EP2,STOML2,SEC13,APRT,GADD45GIP1,UQCC3,ASMTL,ATP5F1A,ATP5F1B,ATP5MC2,ATP5ME,ATP5PO,GAPDH,NDUFA8,NDUFB2,NDUFB7,NDUFB8,NDUFB9,NDUFB10,NDUFS3,NDUFV1,NDUFS5,NDUFS8,NDUFV3,NME1,UQCRFS1P1,NTHL1,GPX1,NME2P1,GUK1,SLC2A6,TPI1,PARK7,ACOT7,PFKM,PGAM4,PKM,UQCRC1,UQCRH,NDUFB11,COX4I1,COX6B1,ELOVL1,ATP5MF,NDUFS7,DBI,EIF6,SDHAF2,ACOT8,ENO1
GO: Biological Process	GO:0055114	oxidation-reduction process	4.715e-11	2.28e-07	2.591e-09	2.347e-08	75	1231	AKR1A1,MDH2,ECSIT,ALDOC,AKR1B1,UQCRHL,SEC13,SELENOW,FOXRED1,ALKBH7,APEX1,MSRB2,UQCC3,DYNLL1,SOD1,GAPDH,INPP5K,BCAT2,NDUFA8,NDUFB2,NDUFB7,NDUFB8,NDUFB9,NDUFB10,NDUFS3,NDUFV1,NDUFS5,NDUFS8,NDUFV3,BLVRB,TALDO1,UQCRFS1P1,GPX1,GPX4,TXNDC17,PRDX2,TKT,SLC2A6,PRDX1,HSD17B10,TPI1,TBRG4,PARK7,PHB2,HMOX2,PFKM,TXN,GRHPR,CPT1C,PGAM4,PKM,UQCRC1,UQCRH,PRDX5,TXN2,NDUFB11,COX4I1,COX6B1,POR,IDH3B,IDH3G,PPP1CA,NDUF…
GO: Biological Process	GO:0042273	ribosomal large subunit biogenesis	6.127e-11	2.963e-07	3.329e-09	3.016e-08	16	71	RPL26,RPL38,RPLP0,ZNF622,NHP2,RPL10A,SNU13,EBNA1BP2,RPL14,RPL35,RPLP0P6,EIF6,MRPL20,RPL26L1,MRTO4,RPL7A
GO: Biological Process	GO:0055086	nucleobase-containing small molecule metabolic process	6.532e-11	3.158e-07	3.509e-09	3.18e-08	56	789	PEMT,AHCY,ALDOC,UQCRHL,ATP5F1EP2,STOML2,SEC13,NAGK,APRT,GADD45GIP1,UQCC3,ASMTL,ATP5F1A,ATP5F1B,ATP5MC2,ATP5ME,ATP5PO,GAPDH,NDUFA8,NDUFB2,NDUFB7,NDUFB8,NDUFB9,NDUFB10,NDUFS3,NDUFV1,NDUFS5,NDUFS8,NDUFV3,NME1,UQCRFS1P1,NTHL1,GPX1,NME2P1,GUK1,SLC2A6,TPI1,PARK7,ACOT7,PFKM,PGAM4,PKM,UQCRC1,UQCRH,PMM1,NDUFB11,COX4I1,COX6B1,ELOVL1,ATP5MF,NDUFS7,DBI,EIF6,SDHAF2,ACOT8,ENO1
GO: Biological Process	GO:0006753	nucleoside phosphate metabolic process	7.123e-11	3.444e-07	3.784e-09	3.429e-08	52	702	ALDOC,UQCRHL,ATP5F1EP2,STOML2,SEC13,APRT,GADD45GIP1,UQCC3,ASMTL,ATP5F1A,ATP5F1B,ATP5MC2,ATP5ME,ATP5PO,GAPDH,NDUFA8,NDUFB2,NDUFB7,NDUFB8,NDUFB9,NDUFB10,NDUFS3,NDUFV1,NDUFS5,NDUFS8,NDUFV3,NME1,UQCRFS1P1,NTHL1,GPX1,NME2P1,GUK1,SLC2A6,TPI1,PARK7,ACOT7,PFKM,PGAM4,PKM,UQCRC1,UQCRH,NDUFB11,COX4I1,COX6B1,ELOVL1,ATP5MF,NDUFS7,DBI,EIF6,SDHAF2,ACOT8,ENO1
GO: Biological Process	GO:0045333	cellular respiration	1.201e-10	5.805e-07	6.31e-09	5.717e-08	26	209	MDH2,UQCRHL,UQCC3,NDUFA8,NDUFB2,NDUFB7,NDUFB8,NDUFB9,NDUFB10,NDUFS3,NDUFV1,NDUFS5,NDUFS8,NDUFV3,UQCRFS1P1,TBRG4,PARK7,UQCRC1,UQCRH,NDUFB11,COX4I1,COX6B1,IDH3B,IDH3G,NDUFS7,SDHAF2
GO: Biological Process	GO:0006120	mitochondrial electron transport, NADH to ubiquinone	2.192e-10	1.06e-06	1.14e-08	1.033e-07	14	56	NDUFA8,NDUFB2,NDUFB7,NDUFB8,NDUFB9,NDUFB10,NDUFS3,NDUFV1,NDUFS5,NDUFS8,NDUFV3,PARK7,NDUFB11,NDUFS7
GO: Biological Process	GO:0007007	inner mitochondrial membrane organization	3.267e-10	1.579e-06	1.68e-08	1.523e-07	13	48	CHCHD6,UQCC3,ATP5F1A,ATP5F1B,ATP5MC2,ATP5ME,ATP5PO,TMEM11,SAMM50,TIMM22,ATP5MF,ROMO1,TIMM13
GO: Biological Process	GO:0031145	anaphase-promoting complex-dependent catabolic process	6.054e-10	2.927e-06	3.081e-08	2.792e-07	16	82	ANAPC11,UBA52,UBB,UBC,PSMA7,PSMB2,PSMB3,PSMB6,PSMB7,PSMC3,PSMC4,PSMC5,PSMD3,PSMD7,PSMD8,PSMD11
GO: Biological Process	GO:0022618	ribonucleoprotein complex assembly	1.187e-09	5.738e-06	5.977e-08	5.416e-07	29	284	RPL38,RPLP0,RPS5,RPS14,RPS15,RPS28,RUVBL1,EIF3C,EIF3G,LSM2,EIF3H,EIF3I,SNRPD2,RUVBL2,EIF3K,SNU13,TARBP2,MPV17L2,RPL13A,MRPS11,RPLP0P6,EIF6,EIF3CL,ERAL1,PIH1D1,MRPL20,PQBP1,MRPS2,MRTO4
GO: Biological Process	GO:1901135	carbohydrate derivative metabolic process	1.323e-09	6.396e-06	6.594e-08	5.975e-07	74	1299	RPN1,RPN2,AKR1A1,PEMT,AHCY,ALDOC,AKR1B1,UQCRHL,SDF2,ATP5F1EP2,STOML2,SEC13,NAGK,APRT,GADD45GIP1,UQCC3,ATP5F1A,ATP5F1B,ATP5MC2,ATP5ME,ATP5PO,GAPDH,OST4,NDUFA8,NDUFB2,NDUFB7,NDUFB8,NDUFB9,NDUFB10,DPM2,NDUFS3,NDUFV1,NDUFS5,NDUFS8,NDUFV3,NME1,TALDO1,TMEM258,UQCRFS1P1,NTHL1,NME2P1,SERP2,GUK1,TKT,SLC2A6,TPI1,B4GALT7,PARK7,ACOT7,PFKM,PGAM4,PKM,UQCRC1,UQCRH,PMM1,NDUFB11,COX4I1,COX6B1,ELOVL1,PORCN,ATP5MF,…
GO: Biological Process	GO:0006521	regulation of cellular amino acid metabolic process	1.838e-09	8.887e-06	9.068e-08	8.217e-07	14	65	OAZ1,PARK7,PSMA7,PSMB2,PSMB3,PSMB6,PSMB7,PSMC3,PSMC4,PSMC5,PSMD3,PSMD7,PSMD8,PSMD11
GO: Biological Process	GO:0042255	ribosome assembly	2.275e-09	1.1e-05	1.111e-07	1.007e-06	14	66	RPL38,RPLP0,RPS5,RPS14,RPS15,RPS28,MPV17L2,MRPS11,RPLP0P6,EIF6,ERAL1,MRPL20,MRPS2,MRTO4
GO: Biological Process	GO:0007006	mitochondrial membrane organization	2.77e-09	1.339e-05	1.339e-07	1.213e-06	20	145	SLC25A4,SLC25A5,ALKBH7,SIVA1,CHCHD6,UQCC3,TIMM50,ATP5F1A,ATP5F1B,ATP5MC2,ATP5ME,ATP5PO,SPG7,TMEM11,SAMM50,TIMM22,ATP5MF,ROMO1,RHOT2,TIMM13
GO: Biological Process	GO:0017144	drug metabolic process	3.344e-09	1.617e-05	1.601e-07	1.451e-06	51	760	AKR1A1,PEMT,AHCY,AKR1B1,UQCRHL,ATP5F1EP2,STOML2,NAGK,APRT,GADD45GIP1,UQCC3,DYNLL1,ATP5F1A,SOD1,ATP5F1B,ATP5MC2,ATP5ME,ATP5PO,NDUFA8,NDUFB2,NDUFB7,NDUFB8,NDUFB9,NDUFB10,NDUFS3,NDUFV1,NDUFS5,NDUFS8,NDUFV3,UQCRFS1P1,GPX1,PRDX2,GCAT,PEBP1,PRDX1,PARK7,PKM,UQCRC1,UQCRH,PRDX5,NDUFB11,COX4I1,COX6B1,ELOVL1,POR,ATP5MF,NDUFS7,SDHAF2,SLC52A2,ACOT8,ENO1
GO: Biological Process	GO:0071826	ribonucleoprotein complex subunit organization	3.606e-09	1.744e-05	1.709e-07	1.549e-06	29	298	RPL38,RPLP0,RPS5,RPS14,RPS15,RPS28,RUVBL1,EIF3C,EIF3G,LSM2,EIF3H,EIF3I,SNRPD2,RUVBL2,EIF3K,SNU13,TARBP2,MPV17L2,RPL13A,MRPS11,RPLP0P6,EIF6,EIF3CL,ERAL1,PIH1D1,MRPL20,PQBP1,MRPS2,MRTO4
GO: Biological Process	GO:0030163	protein catabolic process	5.755e-09	2.783e-05	2.702e-07	2.448e-06	59	964	CLPP,MAEA,RACK1,MAD2L2,SDF2,ANXA2P2,SGTA,ANAPC11,VPS25,SIRT2,HSP90AB2P,VPS11,AUP1,USE1,ATG4B,NSFL1C,HTRA2,ADRM1,GPX1,OAZ1,SNF8,UBE2L6,LYPLA2,PARK7,HSPBP1,PHB,UBA52,UBB,UBC,AP2M1,AP2S1,DDA1,UCHL1,PIN1,UFD1,CLTA,TOLLIP,TMUB2,HSP90AB3P,FBXO44,ZFAND2B,PSMA7,PSMB2,PSMB3,PSMB6,PSMB7,FBXL12,PSMC3,PSMC4,PSMC5,PSMD3,PSMD7,PSMD8,PSMD11,CHMP6,DMAC2,UBXN1,BCAP31,VPS28
GO: Biological Process	GO:0010498	proteasomal protein catabolic process	9.437e-09	4.563e-05	4.388e-07	3.976e-06	38	492	MAEA,RACK1,SDF2,SGTA,ANAPC11,SIRT2,HSP90AB2P,AUP1,NSFL1C,GPX1,PARK7,HSPBP1,UBA52,UBB,UBC,DDA1,UCHL1,UFD1,TMUB2,HSP90AB3P,FBXO44,ZFAND2B,PSMA7,PSMB2,PSMB3,PSMB6,PSMB7,FBXL12,PSMC3,PSMC4,PSMC5,PSMD3,PSMD7,PSMD8,PSMD11,DMAC2,UBXN1,BCAP31
GO: Biological Process	GO:0006839	mitochondrial transport	9.601e-09	4.642e-05	4.421e-07	4.006e-06	27	274	STOML2,SLC25A4,SLC25A5,SLC25A6,ALKBH7,SIVA1,TIMM50,ATP5F1A,ATP5F1B,ATP5MC2,ATP5ME,VPS11,ATP5PO,SPG7,PMPCA,HTRA2,AIP,SAMM50,TIMM22,TOMM7,ATP5MF,ROMO1,SMDT1,FIS1,RHOT2,TIMM13,TIMM8B
GO: Biological Process	GO:0015980	energy derivation by oxidation of organic compounds	1.097e-08	5.303e-05	5.003e-07	4.533e-06	29	313	MDH2,UQCRHL,UQCC3,INPP5K,NDUFA8,NDUFB2,NDUFB7,NDUFB8,NDUFB9,NDUFB10,NDUFS3,NDUFV1,NDUFS5,NDUFS8,NDUFV3,UQCRFS1P1,TBRG4,PARK7,PFKM,UQCRC1,UQCRH,NDUFB11,COX4I1,COX6B1,IDH3B,IDH3G,PPP1CA,NDUFS7,SDHAF2
GO: Biological Process	GO:0044257	cellular protein catabolic process	1.257e-08	6.076e-05	5.678e-07	5.145e-06	51	791	CLPP,MAEA,RACK1,SDF2,ANXA2P2,SGTA,ANAPC11,VPS25,SIRT2,HSP90AB2P,VPS11,AUP1,NSFL1C,HTRA2,ADRM1,GPX1,SNF8,UBE2L6,PARK7,HSPBP1,UBA52,UBB,UBC,AP2M1,AP2S1,DDA1,UCHL1,UFD1,CLTA,TOLLIP,TMUB2,HSP90AB3P,FBXO44,ZFAND2B,PSMA7,PSMB2,PSMB3,PSMB6,PSMB7,FBXL12,PSMC3,PSMC4,PSMC5,PSMD3,PSMD7,PSMD8,PSMD11,DMAC2,UBXN1,BCAP31,VPS28
GO: Biological Process	GO:0070498	interleukin-1-mediated signaling pathway	1.438e-08	6.95e-05	6.436e-07	5.831e-06	16	101	UBA52,UBB,UBC,TOLLIP,PSMA7,PSMB2,PSMB3,PSMB6,PSMB7,PSMC3,PSMC4,PSMC5,PSMD3,PSMD7,PSMD8,PSMD11
GO: Biological Process	GO:0033238	regulation of cellular amine metabolic process	2.002e-08	9.682e-05	8.882e-07	8.048e-06	15	90	OAZ1,PEBP1,PARK7,PSMA7,PSMB2,PSMB3,PSMB6,PSMB7,PSMC3,PSMC4,PSMC5,PSMD3,PSMD7,PSMD8,PSMD11
GO: Biological Process	GO:0043161	proteasome-mediated ubiquitin-dependent protein catabolic process	3.661e-08	0.000177	1.609e-06	1.458e-05	34	432	MAEA,RACK1,SGTA,ANAPC11,SIRT2,AUP1,NSFL1C,PARK7,HSPBP1,UBA52,UBB,UBC,DDA1,UCHL1,UFD1,TMUB2,FBXO44,ZFAND2B,PSMA7,PSMB2,PSMB3,PSMB6,PSMB7,FBXL12,PSMC3,PSMC4,PSMC5,PSMD3,PSMD7,PSMD8,PSMD11,DMAC2,UBXN1,BCAP31
GO: Biological Process	GO:0043624	cellular protein complex disassembly	4.114e-08	0.0001989	1.792e-06	1.624e-05	24	238	MRPS12,MRPL51,MRPL27,APEH,MRPL28,GADD45GIP1,CFL1,TWF2,MRPL55,MRPL14,MRPS26,C12orf65,MRPS11,MRPL41,MRPL40,ERAL1,MRPL20,MRPL54,MRPL52,ARPC2,MRPL2,MRPS18A,MRPL4,MRPS2
GO: Biological Process	GO:0090407	organophosphate biosynthetic process	4.512e-08	0.0002182	1.948e-06	1.765e-05	48	751	AKR1A1,PEMT,UQCRHL,ATP5F1EP2,STOML2,APRT,GADD45GIP1,UQCC3,ATP5F1A,ATP5F1B,ATP5MC2,ATP5ME,ATP5PO,INPP5K,NDUFA8,NDUFB2,NDUFB7,NDUFB8,NDUFB9,NDUFB10,DPM2,NDUFS3,NDUFV1,NDUFS5,NDUFS8,NDUFV3,MOCS3,NME1,UQCRFS1P1,NME2P1,GUK1,TKT,TPI1,PARK7,ACOT7,PKM,UQCRC1,UQCRH,NDUFB11,COX4I1,COX6B1,ELOVL1,ATP5MF,NDUFS7,SDHAF2,DOLPP1,ENO1,DCXR
GO: Biological Process	GO:0043618	regulation of transcription from RNA polymerase II promoter in response to stress	4.705e-08	0.0002275	2.013e-06	1.824e-05	17	124	SIRT2,ELOB,UBA52,UBB,UBC,PSMA7,PSMB2,PSMB3,PSMB6,PSMB7,PSMC3,PSMC4,PSMC5,PSMD3,PSMD7,PSMD8,PSMD11
GO: Biological Process	GO:0031146	SCF-dependent proteasomal ubiquitin-dependent protein catabolic process	4.92e-08	0.0002379	2.087e-06	1.891e-05	15	96	FBXO44,PSMA7,PSMB2,PSMB3,PSMB6,PSMB7,FBXL12,PSMC3,PSMC4,PSMC5,PSMD3,PSMD7,PSMD8,PSMD11,DMAC2
GO: Biological Process	GO:0070646	protein modification by small protein removal	6.91e-08	0.0003341	2.905e-06	2.633e-05	27	301	ACTB,MCRS1,OTUB1,RUVBL1,COPS6,ADRM1,GPS1,PARK7,UBA52,UBB,UBC,UCHL1,UFD1,COPS7B,PSMA7,PSMB2,PSMB3,PSMB6,PSMB7,PSMC3,PSMC4,PSMC5,PSMD3,PSMD7,PSMD8,PSMD11,UBXN1
GO: Biological Process	GO:0043620	regulation of DNA-templated transcription in response to stress	1.07e-07	0.0005173	4.459e-06	4.04e-05	17	131	SIRT2,ELOB,UBA52,UBB,UBC,PSMA7,PSMB2,PSMB3,PSMB6,PSMB7,PSMC3,PSMC4,PSMC5,PSMD3,PSMD7,PSMD8,PSMD11
GO: Biological Process	GO:0042407	cristae formation	1.695e-07	0.0008195	7.004e-06	6.346e-05	9	33	CHCHD6,UQCC3,ATP5F1A,ATP5F1B,ATP5MC2,ATP5ME,ATP5PO,SAMM50,ATP5MF
GO: Biological Process	GO:0043488	regulation of mRNA stability	1.789e-07	0.000865	7.33e-06	6.642e-05	20	185	APEX1,EXOSC7,TBRG4,UBA52,UBB,UBC,EXOSC4,PSMA7,PSMB2,PSMB3,PSMB6,PSMB7,PSMC3,PSMC4,PSMC5,PSMD3,PSMD7,PSMD8,EXOSC5,PSMD11
GO: Biological Process	GO:0009894	regulation of catabolic process	2.096e-07	0.001013	8.514e-06	7.715e-05	58	1042	RACK1,MAD2L2,SEC13,LAMTOR2,ANXA2P2,SGTA,APEX1,NPRL2,SIRT2,HSP90AB2P,EXOSC7,VPS11,ATP6V0B,GAPDH,ATG4B,MLST8,HTRA2,GPX1,OAZ1,ATP6V0D1,SLC2A6,CDK4,SNF8,TBRG4,PARK7,HSPBP1,PHB,UBA52,UBB,UBC,DDA1,UCHL1,PIN1,EXOSC4,HSP90AB3P,TOMM7,PHF23,PPP1CA,PSMA7,PSMB2,PSMB3,PSMB6,PSMB7,PSMC3,PSMC4,PSMC5,PSMD3,PSMD7,PSMD8,EXOSC5,PSMD11,DBI,EIF6,LAMTOR1,CHMP6,UBXN1,BCAP31,VPS28
GO: Biological Process	GO:0042274	ribosomal small subunit biogenesis	3.248e-07	0.00157	1.298e-05	0.0001176	12	69	RPL38,RPS5,RPS6,RPS8,RPS14,RPS15,RPS16,RPS21,RPS24,RPS28,MRPS11,ERAL1
GO: Biological Process	GO:1901565	organonitrogen compound catabolic process	3.249e-07	0.001571	1.298e-05	0.0001176	69	1348	CLPP,MAEA,RACK1,AHCY,MAD2L2,SDF2,ANXA2P2,SGTA,ANAPC11,VPS25,SIRT2,HSP90AB2P,VPS11,AUP1,USE1,BCAT2,BLVRB,ATG4B,NSFL1C,HTRA2,ADRM1,NTHL1,GPX1,OAZ1,GCAT,HSD17B10,SNF8,UBE2L6,LYPLA2,PARK7,ACOT7,HSPBP1,HMOX2,PHB,UBA52,UBB,UBC,AP2M1,AP2S1,DDA1,UCHL1,PIN1,UFD1,CLTA,TOLLIP,TXN2,TMUB2,HSP90AB3P,FBXO44,ZFAND2B,PSMA7,PSMB2,PSMB3,PSMB6,PSMB7,FBXL12,PSMC3,PSMC4,PSMC5,PSMD3,PSMD7,PSMD8,PSMD11,IVD,CHMP6,DMAC2,U…
GO: Biological Process	GO:0043487	regulation of RNA stability	3.567e-07	0.001725	1.414e-05	0.0001281	20	193	APEX1,EXOSC7,TBRG4,UBA52,UBB,UBC,EXOSC4,PSMA7,PSMB2,PSMB3,PSMB6,PSMB7,PSMC3,PSMC4,PSMC5,PSMD3,PSMD7,PSMD8,EXOSC5,PSMD11
GO: Biological Process	GO:0032984	protein-containing complex disassembly	3.65e-07	0.001765	1.435e-05	0.00013	32	432	MRPS12,MRPL51,MRPL27,MAP1LC3B2,ANXA2P2,APEH,MRPL28,GADD45GIP1,CHMP2A,CFL1,TWF2,AP2M1,AP2S1,CLTA,PHF23,MRPL55,PPP1CA,MRPL14,MRPS26,C12orf65,MRPS11,MRPL41,MRPL40,ERAL1,MRPL20,MRPL54,MRPL52,ARPC2,MRPL2,MRPS18A,MRPL4,MRPS2
GO: Biological Process	GO:0048002	antigen processing and presentation of peptide antigen	3.878e-07	0.001875	1.512e-05	0.000137	20	194	SEC13,DYNLL1,AP1M1,DCTN3,AP2M1,AP2S1,CLTA,PSMA7,PSMB2,PSMB3,PSMB6,PSMB7,PSMC3,PSMC4,PSMC5,PSMD3,PSMD7,PSMD8,PSMD11,BCAP31
GO: Biological Process	GO:0002478	antigen processing and presentation of exogenous peptide antigen	4.047e-07	0.001957	1.563e-05	0.0001416	19	177	SEC13,DYNLL1,AP1M1,DCTN3,AP2M1,AP2S1,CLTA,PSMA7,PSMB2,PSMB3,PSMB6,PSMB7,PSMC3,PSMC4,PSMC5,PSMD3,PSMD7,PSMD8,PSMD11
GO: Biological Process	GO:0051603	proteolysis involved in cellular protein catabolic process	4.074e-07	0.00197	1.563e-05	0.0001416	45	735	CLPP,MAEA,RACK1,SDF2,SGTA,ANAPC11,VPS25,SIRT2,HSP90AB2P,AUP1,NSFL1C,ADRM1,GPX1,SNF8,UBE2L6,PARK7,HSPBP1,UBA52,UBB,UBC,DDA1,UCHL1,UFD1,TOLLIP,TMUB2,HSP90AB3P,FBXO44,ZFAND2B,PSMA7,PSMB2,PSMB3,PSMB6,PSMB7,FBXL12,PSMC3,PSMC4,PSMC5,PSMD3,PSMD7,PSMD8,PSMD11,DMAC2,UBXN1,BCAP31,VPS28
GO: Biological Process	GO:0002474	antigen processing and presentation of peptide antigen via MHC class I	4.891e-07	0.002365	1.862e-05	0.0001687	14	99	SEC13,PSMA7,PSMB2,PSMB3,PSMB6,PSMB7,PSMC3,PSMC4,PSMC5,PSMD3,PSMD7,PSMD8,PSMD11,BCAP31
GO: Biological Process	GO:1902036	regulation of hematopoietic stem cell differentiation	6.134e-07	0.002966	2.317e-05	0.0002099	12	73	PSMA7,PSMB2,PSMB3,PSMB6,PSMB7,PSMC3,PSMC4,PSMC5,PSMD3,PSMD7,PSMD8,PSMD11
GO: Biological Process	GO:0019884	antigen processing and presentation of exogenous antigen	7.371e-07	0.003564	2.763e-05	0.0002503	19	184	SEC13,DYNLL1,AP1M1,DCTN3,AP2M1,AP2S1,CLTA,PSMA7,PSMB2,PSMB3,PSMB6,PSMB7,PSMC3,PSMC4,PSMC5,PSMD3,PSMD7,PSMD8,PSMD11
GO: Biological Process	GO:0043632	modification-dependent macromolecule catabolic process	7.724e-07	0.003735	2.873e-05	0.0002603	41	655	MAEA,RACK1,SGTA,ANAPC11,VPS25,SIRT2,EXOSC7,AUP1,NSFL1C,ADRM1,SNF8,UBE2L6,PARK7,HSPBP1,UBA52,UBB,UBC,DDA1,UCHL1,UFD1,TOLLIP,TMUB2,FBXO44,ZFAND2B,PSMA7,PSMB2,PSMB3,PSMB6,PSMB7,FBXL12,PSMC3,PSMC4,PSMC5,PSMD3,PSMD7,PSMD8,PSMD11,DMAC2,UBXN1,BCAP31,VPS28
GO: Biological Process	GO:0002479	antigen processing and presentation of exogenous peptide antigen via MHC class I, TAP-dependent	8.294e-07	0.00401	3.061e-05	0.0002774	12	75	PSMA7,PSMB2,PSMB3,PSMB6,PSMB7,PSMC3,PSMC4,PSMC5,PSMD3,PSMD7,PSMD8,PSMD11
GO: Biological Process	GO:0000028	ribosomal small subunit assembly	9.066e-07	0.004383	3.321e-05	0.0003009	7	21	RPL38,RPS5,RPS14,RPS15,RPS28,MRPS11,ERAL1
GO: Biological Process	GO:0006511	ubiquitin-dependent protein catabolic process	9.762e-07	0.00472	3.549e-05	0.0003216	40	637	MAEA,RACK1,SGTA,ANAPC11,VPS25,SIRT2,AUP1,NSFL1C,ADRM1,SNF8,UBE2L6,PARK7,HSPBP1,UBA52,UBB,UBC,DDA1,UCHL1,UFD1,TOLLIP,TMUB2,FBXO44,ZFAND2B,PSMA7,PSMB2,PSMB3,PSMB6,PSMB7,FBXL12,PSMC3,PSMC4,PSMC5,PSMD3,PSMD7,PSMD8,PSMD11,DMAC2,UBXN1,BCAP31,VPS28
GO: Biological Process	GO:0071453	cellular response to oxygen levels	1.037e-06	0.005012	3.74e-05	0.0003389	22	244	SIRT2,ATP6AP1,ELOB,ATP6V0D1,PHB2,UBA52,UBB,UBC,PICK1,PSMA7,PSMB2,PSMB3,PSMB6,PSMB7,PSMC3,PSMC4,PSMC5,PSMD3,PSMD7,PSMD8,PSMD11,ENO1
GO: Biological Process	GO:0019637	organophosphate metabolic process	1.09e-06	0.005271	3.879e-05	0.0003515	62	1203	AKR1A1,PEMT,ALDOC,UQCRHL,ATP5F1EP2,STOML2,SEC13,APRT,GADD45GIP1,UQCC3,ASMTL,ATP5F1A,ATP5F1B,ATP5MC2,ATP5ME,ATP5PO,GAPDH,INPP5K,NDUFA8,NDUFB2,NDUFB7,NDUFB8,NDUFB9,NDUFB10,DPM2,NDUFS3,NDUFV1,NDUFS5,NDUFS8,NDUFV3,MOCS3,NME1,TALDO1,UQCRFS1P1,NTHL1,GPX1,GPX4,NME2P1,GUK1,TKT,SLC2A6,TPI1,PARK7,ACOT7,PFKM,PGAM4,PKM,UQCRC1,UQCRH,NDUFB11,COX4I1,COX6B1,ELOVL1,ATP5MF,NDUFS7,DBI,EIF6,SDHAF2,ACOT8,DOLPP1,ENO1,…
GO: Biological Process	GO:0061013	regulation of mRNA catabolic process	1.091e-06	0.005275	3.879e-05	0.0003515	20	207	APEX1,EXOSC7,TBRG4,UBA52,UBB,UBC,EXOSC4,PSMA7,PSMB2,PSMB3,PSMB6,PSMB7,PSMC3,PSMC4,PSMC5,PSMD3,PSMD7,PSMD8,EXOSC5,PSMD11
GO: Biological Process	GO:0016579	protein deubiquitination	1.157e-06	0.005592	4.082e-05	0.0003699	24	285	ACTB,MCRS1,OTUB1,RUVBL1,ADRM1,PARK7,UBA52,UBB,UBC,UCHL1,UFD1,PSMA7,PSMB2,PSMB3,PSMB6,PSMB7,PSMC3,PSMC4,PSMC5,PSMD3,PSMD7,PSMD8,PSMD11,UBXN1
GO: Biological Process	GO:0019941	modification-dependent protein catabolic process	1.234e-06	0.005966	4.323e-05	0.0003917	40	643	MAEA,RACK1,SGTA,ANAPC11,VPS25,SIRT2,AUP1,NSFL1C,ADRM1,SNF8,UBE2L6,PARK7,HSPBP1,UBA52,UBB,UBC,DDA1,UCHL1,UFD1,TOLLIP,TMUB2,FBXO44,ZFAND2B,PSMA7,PSMB2,PSMB3,PSMB6,PSMB7,FBXL12,PSMC3,PSMC4,PSMC5,PSMD3,PSMD7,PSMD8,PSMD11,DMAC2,UBXN1,BCAP31,VPS28
GO: Biological Process	GO:0055085	transmembrane transport	1.464e-06	0.007077	5.091e-05	0.0004613	84	1830	ACTB,RACK1,UQCRHL,ATP5F1EP2,STOML2,SLC25A4,SLC25A5,SLC25A6,ANXA2P2,GADD45GIP1,PHPT1,UQCC3,EBP,TIMM50,ATOX1,ATP5F1A,ATP5F1B,ATP5MC2,ATP5ME,ATP6V0B,ATP6AP1,ATP5PO,SPG7,INPP5K,FXYD6,NDUFA8,NDUFB2,NDUFB7,NDUFB8,NDUFB9,NDUFB10,NDUFS3,NDUFV1,NDUFS5,NDUFS8,NDUFV3,PMPCA,UQCRFS1P1,OAZ1,CORO1A,ATP6V0D1,SLC2A6,CD63,MFSD5,CFL1,PARK7,PHB2,PHB,UBA52,UBB,UBC,SLC35A2,PEX16,UQCRC1,UQCRH,TIMM22,STX8,NDUFB11,TOMM7,…
GO: Biological Process	GO:1904874	positive regulation of telomerase RNA localization to Cajal body	1.634e-06	0.0079	5.643e-05	0.0005113	6	15	NOP10,CCT7,NHP2,RUVBL1,CCT5,RUVBL2
GO: Biological Process	GO:0042590	antigen processing and presentation of exogenous peptide antigen via MHC class I	1.69e-06	0.008171	5.795e-05	0.0005251	12	80	PSMA7,PSMB2,PSMB3,PSMB6,PSMB7,PSMC3,PSMC4,PSMC5,PSMD3,PSMD7,PSMD8,PSMD11
GO: Biological Process	GO:0042776	mitochondrial ATP synthesis coupled proton transport	1.823e-06	0.008813	6.163e-05	0.0005584	7	23	STOML2,ATP5F1A,ATP5F1B,ATP5MC2,ATP5ME,ATP5PO,ATP5MF
GO: Biological Process	GO:0000715	nucleotide-excision repair, DNA damage recognition	1.823e-06	0.008813	6.163e-05	0.0005584	7	23	COPS6,GPS1,CETN2,UBA52,UBB,UBC,COPS7B
GO: Biological Process	GO:0019882	antigen processing and presentation	2.1e-06	0.01015	7.049e-05	0.0006387	21	235	SEC13,DYNLL1,AP1M1,DCTN3,RAB33A,AP2M1,AP2S1,CLTA,PSMA7,PSMB2,PSMB3,PSMB6,PSMB7,PSMC3,PSMC4,PSMC5,PSMD3,PSMD7,PSMD8,PSMD11,BCAP31
GO: Biological Process	GO:0060071	Wnt signaling pathway, planar cell polarity pathway	2.235e-06	0.01081	7.453e-05	0.0006754	14	112	AP2M1,AP2S1,PSMA7,PSMB2,PSMB3,PSMB6,PSMB7,PSMC3,PSMC4,PSMC5,PSMD3,PSMD7,PSMD8,PSMD11
GO: Biological Process	GO:0006281	DNA repair	2.372e-06	0.01147	7.854e-05	0.0007116	36	564	RPS3,FANCG,MCRS1,MAD2L2,MPG,RPAIN,OTUB1,APEX1,NUDT16L1,RUVBL1,CENPX,RUVBL2,MMS19,COPS6,NSMCE1,NTHL1,GPS1,UBE2L6,CETN2,PARK7,UBA52,UBB,UBC,UFD1,COPS7B,POLR2F,POLR2H,POLR2I,POLR2L,PPP4C,PPP5C,ENDOV,RNF113A,TMEM161A,SEM1,RFC2
GO: Biological Process	GO:0001732	formation of cytoplasmic translation initiation complex	2.554e-06	0.01235	8.401e-05	0.0007612	6	16	EIF3C,EIF3G,EIF3H,EIF3I,EIF3K,EIF3CL
GO: Biological Process	GO:0019752	carboxylic acid metabolic process	2.606e-06	0.0126	8.513e-05	0.0007713	58	1127	AKR1A1,MDH2,FARSA,PEMT,AHCY,ALDOC,SEC13,NAGK,ALKBH7,GAPDH,BCAT2,BSG,GPX1,GPX4,OAZ1,GSS,GCAT,SLC2A6,HSD17B10,HAGH,TPI1,LYPLA2,PARK7,PEPD,ACOT7,PFKM,GRHPR,CPT1C,PGAM4,PKM,UROD,TXN2,ELOVL1,POR,IDH3B,IDH3G,PSMA7,PSMB2,PSMB3,PSMB6,PSMB7,PSMC3,PSMC4,PSMC5,PSMD3,PSMD7,PSMD8,PSMD11,DBI,EIF6,IVD,QARS1,ACOT8,ECH1,ECHS1,DALRD3,ENO1,DCXR
GO: Biological Process	GO:0090175	regulation of establishment of planar polarity	2.767e-06	0.01338	8.979e-05	0.0008136	14	114	AP2M1,AP2S1,PSMA7,PSMB2,PSMB3,PSMB6,PSMB7,PSMC3,PSMC4,PSMC5,PSMD3,PSMD7,PSMD8,PSMD11
GO: Biological Process	GO:0060218	hematopoietic stem cell differentiation	2.871e-06	0.01388	9.253e-05	0.0008384	12	84	PSMA7,PSMB2,PSMB3,PSMB6,PSMB7,PSMC3,PSMC4,PSMC5,PSMD3,PSMD7,PSMD8,PSMD11
GO: Biological Process	GO:0006289	nucleotide-excision repair	3.073e-06	0.01486	9.84e-05	0.0008916	14	115	MMS19,COPS6,NTHL1,GPS1,CETN2,UBA52,UBB,UBC,COPS7B,POLR2F,POLR2H,POLR2I,POLR2L,RFC2
GO: Biological Process	GO:0071347	cellular response to interleukin-1	3.135e-06	0.01516	9.971e-05	0.0009035	18	184	OTUB1,CFL1,UBA52,UBB,UBC,TOLLIP,PSMA7,PSMB2,PSMB3,PSMB6,PSMB7,PSMC3,PSMC4,PSMC5,PSMD3,PSMD7,PSMD8,PSMD11
GO: Biological Process	GO:0006283	transcription-coupled nucleotide-excision repair	4.368e-06	0.02112	0.000138	0.001251	11	73	COPS6,GPS1,UBA52,UBB,UBC,COPS7B,POLR2F,POLR2H,POLR2I,POLR2L,RFC2
GO: Biological Process	GO:0036294	cellular response to decreased oxygen levels	4.539e-06	0.02195	0.0001425	0.001291	20	227	SIRT2,ELOB,PHB2,UBA52,UBB,UBC,PICK1,PSMA7,PSMB2,PSMB3,PSMB6,PSMB7,PSMC3,PSMC4,PSMC5,PSMD3,PSMD7,PSMD8,PSMD11,ENO1
GO: Biological Process	GO:1904872	regulation of telomerase RNA localization to Cajal body	5.651e-06	0.02732	0.0001763	0.001597	6	18	NOP10,CCT7,NHP2,RUVBL1,CCT5,RUVBL2
GO: Biological Process	GO:0006734	NADH metabolic process	6.12e-06	0.02959	0.0001897	0.001719	9	49	MDH2,ALDOC,GAPDH,TPI1,PFKM,PKM,IDH3B,IDH3G,ENO1
GO: Biological Process	GO:0070482	response to oxygen levels	6.498e-06	0.03142	0.0002001	0.001813	29	425	AHCY,SIRT2,ATP6AP1,ELOB,ATP6V0D1,CDK4,PHB2,HMOX2,UBA52,UBB,UBC,PIN1,PKM,TXN2,PICK1,PSMA7,PSMB2,PSMB3,PSMB6,PSMB7,PSMC3,PSMC4,PSMC5,PSMD3,PSMD7,PSMD8,PSMD11,FIS1,ENO1
GO: Biological Process	GO:1901532	regulation of hematopoietic progenitor cell differentiation	6.741e-06	0.03259	0.0002063	0.001869	12	91	PSMA7,PSMB2,PSMB3,PSMB6,PSMB7,PSMC3,PSMC4,PSMC5,PSMD3,PSMD7,PSMD8,PSMD11
GO: Biological Process	GO:0044106	cellular amine metabolic process	6.833e-06	0.03304	0.0002078	0.001883	15	140	OAZ1,PEBP1,PARK7,PSMA7,PSMB2,PSMB3,PSMB6,PSMB7,PSMC3,PSMC4,PSMC5,PSMD3,PSMD7,PSMD8,PSMD11
GO: Biological Process	GO:0006626	protein targeting to mitochondrion	7.821e-06	0.03781	0.0002363	0.002141	13	108	SLC25A6,TIMM50,VPS11,PMPCA,HTRA2,AIP,SAMM50,TIMM22,TOMM7,ROMO1,FIS1,TIMM13,TIMM8B
GO: Biological Process	GO:0071456	cellular response to hypoxia	8.015e-06	0.03875	0.0002365	0.002143	19	216	SIRT2,ELOB,PHB2,UBA52,UBB,UBC,PSMA7,PSMB2,PSMB3,PSMB6,PSMB7,PSMC3,PSMC4,PSMC5,PSMD3,PSMD7,PSMD8,PSMD11,ENO1
GO: Biological Process	GO:0090685	RNA localization to nucleus	8.069e-06	0.03902	0.0002365	0.002143	6	19	NOP10,CCT7,NHP2,RUVBL1,CCT5,RUVBL2
GO: Biological Process	GO:0090672	telomerase RNA localization	8.069e-06	0.03902	0.0002365	0.002143	6	19	NOP10,CCT7,NHP2,RUVBL1,CCT5,RUVBL2
GO: Biological Process	GO:0090670	RNA localization to Cajal body	8.069e-06	0.03902	0.0002365	0.002143	6	19	NOP10,CCT7,NHP2,RUVBL1,CCT5,RUVBL2
GO: Biological Process	GO:0090671	telomerase RNA localization to Cajal body	8.069e-06	0.03902	0.0002365	0.002143	6	19	NOP10,CCT7,NHP2,RUVBL1,CCT5,RUVBL2
GO: Biological Process	GO:0006520	cellular amino acid metabolic process	9.631e-06	0.04657	0.0002805	0.002542	26	366	FARSA,PEMT,AHCY,BCAT2,OAZ1,GSS,GCAT,HSD17B10,PARK7,PEPD,TXN2,PSMA7,PSMB2,PSMB3,PSMB6,PSMB7,PSMC3,PSMC4,PSMC5,PSMD3,PSMD7,PSMD8,PSMD11,IVD,QARS1,DALRD3
GO: Biological Process	GO:0000086	G2/M transition of mitotic cell cycle	1.021e-05	0.04939	0.0002957	0.00268	21	260	PPME1,LCMT1,DYNLL1,CDC25B,DCTN3,CDK4,CETN2,PPP2R1A,PSMA7,PSMB2,PSMB3,PSMB6,PSMB7,FBXL12,PSMC3,PSMC4,PSMC5,PSMD3,PSMD7,PSMD8,PSMD11
GO: Biological Process	GO:0006888	endoplasmic reticulum to Golgi vesicle-mediated transport	1.043e-05	0.05042	0.0003001	0.002719	19	220	PEF1,SEC13,YIF1B,ERGIC3,DYNLL1,TRAPPC2L,USE1,YIF1A,LMAN2,ERP29,TMED3,DCTN3,COPE,TRAPPC1,RAB33A,TRAPPC6A,NRBP1,COG7,BCAP31
GO: Biological Process	GO:0070647	protein modification by small protein conjugation or removal	1.451e-05	0.07017	0.0004104	0.003719	56	1138	CTU2,RPS3,RNF181,MAEA,ACTB,PEF1,RACK1,MCRS1,MAD2L2,OTUB1,ANAPC11,RUVBL1,CENPX,AUP1,MOCS3,COPS6,NSMCE1,ELOB,PCGF1,ADRM1,GPS1,RNF25,UBE2L6,PARK7,HSPBP1,EIPR1,UBA52,UBB,UBC,UCHL1,PIN1,UFD1,COPS7B,TOLLIP,PHF23,PAF1,FBXO44,PSMA7,RNF113A,PSMB2,PSMB3,PSMB6,PSMB7,FBXL12,PSMC3,PSMC4,PSMC5,PSMD3,PSMD7,PSMD8,PSMD11,URM1,DMAC2,UBXN1,NOSIP,VPS28
GO: Biological Process	GO:0022411	cellular component disassembly	1.452e-05	0.07019	0.0004104	0.003719	38	662	MRPS12,MRPL51,MRPL27,MAP1LC3B2,ANXA2P2,APEH,MRPL28,GADD45GIP1,CHMP2A,BSG,HTRA2,WDR45,CFL1,PARK7,TWF2,AP2M1,AP2S1,CLTA,TOMM7,PHF23,MRPL55,PPP1CA,MRPL14,MRPS26,C12orf65,MRPS11,MRPL41,MRPL40,ERAL1,MRPL20,MRPL54,FIS1,MRPL52,ARPC2,MRPL2,MRPS18A,MRPL4,MRPS2
GO: Biological Process	GO:0009308	amine metabolic process	1.459e-05	0.07052	0.0004104	0.003719	15	149	OAZ1,PEBP1,PARK7,PSMA7,PSMB2,PSMB3,PSMB6,PSMB7,PSMC3,PSMC4,PSMC5,PSMD3,PSMD7,PSMD8,PSMD11
GO: Biological Process	GO:0010972	negative regulation of G2/M transition of mitotic cell cycle	1.46e-05	0.07059	0.0004104	0.003719	12	98	PSMA7,PSMB2,PSMB3,PSMB6,PSMB7,PSMC3,PSMC4,PSMC5,PSMD3,PSMD7,PSMD8,PSMD11
GO: Biological Process	GO:0031329	regulation of cellular catabolic process	1.482e-05	0.07165	0.0004142	0.003753	46	869	RACK1,LAMTOR2,ANXA2P2,SGTA,APEX1,NPRL2,SIRT2,HSP90AB2P,EXOSC7,VPS11,ATP6V0B,GAPDH,MLST8,HTRA2,GPX1,ATP6V0D1,TBRG4,PARK7,HSPBP1,UBA52,UBB,UBC,DDA1,UCHL1,EXOSC4,HSP90AB3P,TOMM7,PHF23,PPP1CA,PSMA7,PSMB2,PSMB3,PSMB6,PSMB7,PSMC3,PSMC4,PSMC5,PSMD3,PSMD7,PSMD8,EXOSC5,PSMD11,DBI,LAMTOR1,UBXN1,BCAP31
GO: Biological Process	GO:0010389	regulation of G2/M transition of mitotic cell cycle	1.513e-05	0.07314	0.0004189	0.003796	18	206	DYNLL1,CDC25B,DCTN3,CDK4,CETN2,PPP2R1A,PSMA7,PSMB2,PSMB3,PSMB6,PSMB7,PSMC3,PSMC4,PSMC5,PSMD3,PSMD7,PSMD8,PSMD11
GO: Biological Process	GO:0015672	monovalent inorganic cation transport	1.516e-05	0.07331	0.0004189	0.003796	40	714	UQCRHL,ATP5F1EP2,STOML2,SLC25A4,GADD45GIP1,UQCC3,ATP5F1A,ATP5F1B,ATP5MC2,ATP5ME,ATP6V0B,ATP6AP1,ATP5PO,FXYD6,NDUFA8,NDUFB2,NDUFB7,NDUFB8,NDUFB9,NDUFB10,NDUFS3,NDUFV1,NDUFS5,NDUFS8,NDUFV3,UQCRFS1P1,ATP6V0D1,SLC2A6,CD63,PARK7,PHB2,UQCRC1,UQCRH,NDUFB11,COX4I1,COX6B1,ATP5MF,PRKCZ,NDUFS7,SDHAF2
GO: Biological Process	GO:0001736	establishment of planar polarity	1.548e-05	0.07483	0.0004252	0.003852	14	132	AP2M1,AP2S1,PSMA7,PSMB2,PSMB3,PSMB6,PSMB7,PSMC3,PSMC4,PSMC5,PSMD3,PSMD7,PSMD8,PSMD11
GO: Biological Process	GO:0007164	establishment of tissue polarity	1.687e-05	0.08158	0.0004609	0.004176	14	133	AP2M1,AP2S1,PSMA7,PSMB2,PSMB3,PSMB6,PSMB7,PSMC3,PSMC4,PSMC5,PSMD3,PSMD7,PSMD8,PSMD11
GO: Biological Process	GO:0097237	cellular response to toxic substance	1.711e-05	0.08273	0.0004648	0.004211	21	269	RPS3,ACTB,AKR1A1,RACK1,AKR1B1,STK25,SELENOW,APEX1,SOD1,GPX1,GPX4,TXNDC17,PRDX2,PRDX1,CFL1,PARK7,TXN,PRDX5,PPP5C,CCS,FIS1
GO: Biological Process	GO:0070555	response to interleukin-1	2.23e-05	0.1078	0.0006025	0.005459	18	212	OTUB1,CFL1,UBA52,UBB,UBC,TOLLIP,PSMA7,PSMB2,PSMB3,PSMB6,PSMB7,PSMC3,PSMC4,PSMC5,PSMD3,PSMD7,PSMD8,PSMD11
GO: Biological Process	GO:0042180	cellular ketone metabolic process	2.254e-05	0.109	0.0006054	0.005486	21	274	AKR1A1,AKR1B1,OAZ1,HAGH,TPI1,PARK7,PSMA7,PSMB2,PSMB3,PSMB6,PSMB7,PSMC3,PSMC4,PSMC5,PSMD3,PSMD7,PSMD8,PSMD11,DBI,EIF6,COQ4
GO: Biological Process	GO:0006396	RNA processing	2.626e-05	0.127	0.0007015	0.006356	67	1474	POP7,RPL26,RPL27,CTU2,RPS6,RPS8,RPS9,RPS14,RPS15,RPS16,LAGE3,RPS21,RPS24,RPS28,NOP10,NOP56,PUF60,WDR83,TRMT1,NHP2,TRUB2,NSUN5,RBMX2,RPUSD2,LSM2,EXOSC7,SNRPD2,LSM7,RPL10A,ZMAT5,MOCS3,FASTK,IMP4,SNU13,EBNA1BP2,TARBP2,RPL14,PRPF4,HSD17B10,RPL35,LSM10,TBRG4,TSEN34,EXOSC4,DDX49,POLR2F,POLR2H,POLR2I,POLR2L,RBM42,DDX56,PAF1,THOC6,PPP2R1A,MRPS11,SF3B5,RNF113A,EXOSC5,INTS11,URM1,PIH1D1,SNRNP25,PQBP1,MRTO4…
GO: Biological Process	GO:0043436	oxoacid metabolic process	2.683e-05	0.1297	0.0007127	0.006458	58	1219	AKR1A1,MDH2,FARSA,PEMT,AHCY,ALDOC,SEC13,NAGK,ALKBH7,GAPDH,BCAT2,BSG,GPX1,GPX4,OAZ1,GSS,GCAT,SLC2A6,HSD17B10,HAGH,TPI1,LYPLA2,PARK7,PEPD,ACOT7,PFKM,GRHPR,CPT1C,PGAM4,PKM,UROD,TXN2,ELOVL1,POR,IDH3B,IDH3G,PSMA7,PSMB2,PSMB3,PSMB6,PSMB7,PSMC3,PSMC4,PSMC5,PSMD3,PSMD7,PSMD8,PSMD11,DBI,EIF6,IVD,QARS1,ACOT8,ECH1,ECHS1,DALRD3,ENO1,DCXR
GO: Biological Process	GO:0044839	cell cycle G2/M phase transition	2.947e-05	0.1425	0.0007785	0.007054	21	279	PPME1,LCMT1,DYNLL1,CDC25B,DCTN3,CDK4,CETN2,PPP2R1A,PSMA7,PSMB2,PSMB3,PSMB6,PSMB7,FBXL12,PSMC3,PSMC4,PSMC5,PSMD3,PSMD7,PSMD8,PSMD11
GO: Biological Process	GO:0009060	aerobic respiration	3.363e-05	0.1626	0.0008836	0.008007	11	90	MDH2,UQCRHL,NDUFS8,UQCRC1,UQCRH,COX4I1,COX6B1,IDH3B,IDH3G,NDUFS7,SDHAF2
GO: Biological Process	GO:0006122	mitochondrial electron transport, ubiquinol to cytochrome c	3.562e-05	0.1722	0.000931	0.008436	5	15	UQCRHL,UQCC3,UQCRFS1P1,UQCRC1,UQCRH
GO: Biological Process	GO:0006082	organic acid metabolic process	4.148e-05	0.2006	0.001078	0.009771	58	1238	AKR1A1,MDH2,FARSA,PEMT,AHCY,ALDOC,SEC13,NAGK,ALKBH7,GAPDH,BCAT2,BSG,GPX1,GPX4,OAZ1,GSS,GCAT,SLC2A6,HSD17B10,HAGH,TPI1,LYPLA2,PARK7,PEPD,ACOT7,PFKM,GRHPR,CPT1C,PGAM4,PKM,UROD,TXN2,ELOVL1,POR,IDH3B,IDH3G,PSMA7,PSMB2,PSMB3,PSMB6,PSMB7,PSMC3,PSMC4,PSMC5,PSMD3,PSMD7,PSMD8,PSMD11,DBI,EIF6,IVD,QARS1,ACOT8,ECH1,ECHS1,DALRD3,ENO1,DCXR
GO: Biological Process	GO:1902750	negative regulation of cell cycle G2/M phase transition	4.293e-05	0.2076	0.00111	0.01006	12	109	PSMA7,PSMB2,PSMB3,PSMB6,PSMB7,PSMC3,PSMC4,PSMC5,PSMD3,PSMD7,PSMD8,PSMD11
GO: Biological Process	GO:0032446	protein modification by small protein conjugation	4.356e-05	0.2106	0.001117	0.01012	47	935	CTU2,RPS3,RNF181,MAEA,PEF1,RACK1,MAD2L2,OTUB1,ANAPC11,CENPX,AUP1,MOCS3,NSMCE1,ELOB,PCGF1,RNF25,UBE2L6,PARK7,HSPBP1,EIPR1,UBA52,UBB,UBC,PIN1,TOLLIP,PHF23,PAF1,FBXO44,PSMA7,RNF113A,PSMB2,PSMB3,PSMB6,PSMB7,FBXL12,PSMC3,PSMC4,PSMC5,PSMD3,PSMD7,PSMD8,PSMD11,URM1,DMAC2,UBXN1,NOSIP,VPS28
GO: Biological Process	GO:1902749	regulation of cell cycle G2/M phase transition	4.367e-05	0.2111	0.001117	0.01012	18	223	DYNLL1,CDC25B,DCTN3,CDK4,CETN2,PPP2R1A,PSMA7,PSMB2,PSMB3,PSMB6,PSMB7,PSMC3,PSMC4,PSMC5,PSMD3,PSMD7,PSMD8,PSMD11
GO: Biological Process	GO:0090090	negative regulation of canonical Wnt signaling pathway	4.423e-05	0.2139	0.001122	0.01017	16	183	MAD2L2,RUVBL2,PFDN5,PSMA7,PSMB2,PSMB3,PSMB6,PSMB7,PSMC3,PSMC4,PSMC5,PSMD3,PSMD7,PSMD8,PSMD11,SDHAF2
GO: Biological Process	GO:0036293	response to decreased oxygen levels	4.432e-05	0.2143	0.001122	0.01017	26	400	AHCY,SIRT2,ELOB,PHB2,HMOX2,UBA52,UBB,UBC,PIN1,PKM,TXN2,PICK1,PSMA7,PSMB2,PSMB3,PSMB6,PSMB7,PSMC3,PSMC4,PSMC5,PSMD3,PSMD7,PSMD8,PSMD11,FIS1,ENO1
GO: Biological Process	GO:0002183	cytoplasmic translational initiation	4.562e-05	0.2206	0.001148	0.0104	7	36	EIF3C,EIF3G,EIF3H,EIF3I,EIF3K,RPL13A,EIF3CL
GO: Biological Process	GO:0006851	mitochondrial calcium ion transmembrane transport	4.581e-05	0.2215	0.001148	0.0104	6	25	STOML2,SPG7,PMPCA,PHB2,PHB,SMDT1
GO: Biological Process	GO:0098662	inorganic cation transmembrane transport	4.757e-05	0.23	0.001186	0.01074	49	993	UQCRHL,ATP5F1EP2,STOML2,SLC25A4,ANXA2P2,GADD45GIP1,PHPT1,UQCC3,ATOX1,ATP5F1A,ATP5F1B,ATP5MC2,ATP5ME,ATP6V0B,ATP6AP1,ATP5PO,SPG7,FXYD6,NDUFA8,NDUFB2,NDUFB7,NDUFB8,NDUFB9,NDUFB10,NDUFS3,NDUFV1,NDUFS5,NDUFS8,NDUFV3,PMPCA,UQCRFS1P1,CORO1A,ATP6V0D1,SLC2A6,CD63,PARK7,PHB2,PHB,UQCRC1,UQCRH,NDUFB11,COX4I1,COX6B1,ATP5MF,PRKCZ,NDUFS7,SMDT1,DBI,SDHAF2
GO: Biological Process	GO:0006487	protein N-linked glycosylation	5.035e-05	0.2434	0.001248	0.01131	10	78	RPN1,RPN2,OST4,DPM2,TMEM258,B4GALT7,PMM1,DAD1,DDOST,DOLPP1
GO: Biological Process	GO:1990542	mitochondrial transmembrane transport	5.583e-05	0.2699	0.001377	0.01248	11	95	STOML2,TIMM50,ATP5F1A,ATP5F1B,ATP5MC2,ATP5ME,ATP5PO,TOMM7,ATP5MF,ROMO1,SMDT1
GO: Biological Process	GO:0002223	stimulatory C-type lectin receptor signaling pathway	6.135e-05	0.2966	0.001506	0.01364	12	113	PSMA7,PSMB2,PSMB3,PSMB6,PSMB7,PSMC3,PSMC4,PSMC5,PSMD3,PSMD7,PSMD8,PSMD11
GO: Biological Process	GO:0000492	box C/D snoRNP assembly	6.205e-05	0.3	0.001515	0.01373	4	9	RUVBL1,RUVBL2,SNU13,PIH1D1
GO: Biological Process	GO:0001666	response to hypoxia	7.12e-05	0.3443	0.00173	0.01568	25	388	AHCY,SIRT2,ELOB,PHB2,HMOX2,UBA52,UBB,UBC,PIN1,PKM,TXN2,PSMA7,PSMB2,PSMB3,PSMB6,PSMB7,PSMC3,PSMC4,PSMC5,PSMD3,PSMD7,PSMD8,PSMD11,FIS1,ENO1
GO: Biological Process	GO:0006735	NADH regeneration	7.31e-05	0.3534	0.00175	0.01585	6	27	ALDOC,GAPDH,TPI1,PFKM,PKM,ENO1
GO: Biological Process	GO:0061621	canonical glycolysis	7.31e-05	0.3534	0.00175	0.01585	6	27	ALDOC,GAPDH,TPI1,PFKM,PKM,ENO1
GO: Biological Process	GO:0061718	glucose catabolic process to pyruvate	7.31e-05	0.3534	0.00175	0.01585	6	27	ALDOC,GAPDH,TPI1,PFKM,PKM,ENO1
GO: Biological Process	GO:0006301	postreplication repair	7.658e-05	0.3703	0.001824	0.01653	8	52	MAD2L2,NSMCE1,UBE2L6,UBA52,UBB,UBC,UFD1,RFC2
GO: Biological Process	GO:0019068	virion assembly	7.831e-05	0.3786	0.001843	0.0167	7	39	CHMP2A,SNF8,UBA52,UBB,UBC,CHMP6,VPS28
GO: Biological Process	GO:0042769	DNA damage response, detection of DNA damage	7.831e-05	0.3786	0.001843	0.0167	7	39	RPS3,UBA52,UBB,UBC,MRPS26,MRPS11,RFC2
GO: Biological Process	GO:0005997	xylulose metabolic process	7.93e-05	0.3834	0.001843	0.0167	3	4	TALDO1,TKT,DCXR
GO: Biological Process	GO:0043328	protein transport to vacuole involved in ubiquitin-dependent protein catabolic process via the multivesicular body sorting pathway	7.93e-05	0.3834	0.001843	0.0167	3	4	VPS25,SNF8,VPS28
GO: Biological Process	GO:0032447	protein urmylation	7.93e-05	0.3834	0.001843	0.0167	3	4	CTU2,MOCS3,URM1
GO: Biological Process	GO:0016567	protein ubiquitination	8.46e-05	0.4091	0.001948	0.01765	43	852	RPS3,RNF181,MAEA,PEF1,RACK1,MAD2L2,OTUB1,ANAPC11,CENPX,AUP1,NSMCE1,ELOB,PCGF1,RNF25,UBE2L6,PARK7,HSPBP1,EIPR1,UBA52,UBB,UBC,PIN1,PHF23,PAF1,FBXO44,PSMA7,RNF113A,PSMB2,PSMB3,PSMB6,PSMB7,FBXL12,PSMC3,PSMC4,PSMC5,PSMD3,PSMD7,PSMD8,PSMD11,DMAC2,UBXN1,NOSIP,VPS28
GO: Biological Process	GO:0050852	T cell receptor signaling pathway	8.612e-05	0.4164	0.001948	0.01765	17	214	RPS3,STOML2,PHPT1,EIF2B3,EIF2B2,PSMA7,PSMB2,PSMB3,PSMB6,PSMB7,PSMC3,PSMC4,PSMC5,PSMD3,PSMD7,PSMD8,PSMD11
GO: Biological Process	GO:0001738	morphogenesis of a polarized epithelium	8.612e-05	0.4164	0.001948	0.01765	14	154	AP2M1,AP2S1,PSMA7,PSMB2,PSMB3,PSMB6,PSMB7,PSMC3,PSMC4,PSMC5,PSMD3,PSMD7,PSMD8,PSMD11
GO: Biological Process	GO:0035567	non-canonical Wnt signaling pathway	8.612e-05	0.4164	0.001948	0.01765	14	154	AP2M1,AP2S1,PSMA7,PSMB2,PSMB3,PSMB6,PSMB7,PSMC3,PSMC4,PSMC5,PSMD3,PSMD7,PSMD8,PSMD11
GO: Biological Process	GO:0002220	innate immune response activating cell surface receptor signaling pathway	8.622e-05	0.4169	0.001948	0.01765	12	117	PSMA7,PSMB2,PSMB3,PSMB6,PSMB7,PSMC3,PSMC4,PSMC5,PSMD3,PSMD7,PSMD8,PSMD11
GO: Biological Process	GO:1990748	cellular detoxification	8.622e-05	0.4169	0.001948	0.01765	12	117	AKR1A1,SELENOW,SOD1,GPX1,GPX4,TXNDC17,PRDX2,PRDX1,PARK7,TXN,PRDX5,CCS
GO: Biological Process	GO:0090263	positive regulation of canonical Wnt signaling pathway	9.236e-05	0.4465	0.002077	0.01882	14	155	RUVBL1,PIN1,PSMA7,PSMB2,PSMB3,PSMB6,PSMB7,PSMC3,PSMC4,PSMC5,PSMD3,PSMD7,PSMD8,PSMD11
GO: Biological Process	GO:0006974	cellular response to DNA damage stimulus	9.596e-05	0.4639	0.002148	0.01946	44	884	RPL26,RPS3,FANCG,MCRS1,MAD2L2,MPG,ALKBH7,RPAIN,OTUB1,ZDHHC16,APEX1,CHCHD6,NUDT16L1,RUVBL1,CENPX,RUVBL2,MMS19,COPS6,NSMCE1,HTRA2,NTHL1,GPS1,UBE2L6,CETN2,PARK7,UBA52,UBB,UBC,UFD1,COPS7B,PRMT1,POLR2F,POLR2H,POLR2I,POLR2L,PPP4C,PPP5C,MRPS26,MRPS11,ENDOV,RNF113A,TMEM161A,SEM1,RFC2
GO: Biological Process	GO:1901990	regulation of mitotic cell cycle phase transition	0.0001041	0.5034	0.00232	0.02102	28	470	RPL26,CDK2AP2,MAD2L2,LCMT1,APEX1,ANAPC11,SIRT2,DYNLL1,CDC25B,LSM10,DCTN3,CDK4,CETN2,PHB2,PRMT1,PPP2R1A,PSMA7,PSMB2,PSMB3,PSMB6,PSMB7,PSMC3,PSMC4,PSMC5,PSMD3,PSMD7,PSMD8,PSMD11
GO: Biological Process	GO:0019985	translesion synthesis	0.0001092	0.5279	0.002422	0.02194	7	41	MAD2L2,UBE2L6,UBA52,UBB,UBC,UFD1,RFC2
GO: Biological Process	GO:0010565	regulation of cellular ketone metabolic process	0.0001199	0.5797	0.002647	0.02399	16	199	OAZ1,PARK7,PSMA7,PSMB2,PSMB3,PSMB6,PSMB7,PSMC3,PSMC4,PSMC5,PSMD3,PSMD7,PSMD8,PSMD11,DBI,EIF6
GO: Biological Process	GO:0030178	negative regulation of Wnt signaling pathway	0.0001208	0.584	0.002654	0.02405	17	220	RACK1,MAD2L2,RUVBL2,PFDN5,PSMA7,PSMB2,PSMB3,PSMB6,PSMB7,PSMC3,PSMC4,PSMC5,PSMD3,PSMD7,PSMD8,PSMD11,SDHAF2
GO: Biological Process	GO:0061620	glycolytic process through glucose-6-phosphate	0.0001368	0.6614	0.002993	0.02712	6	30	ALDOC,GAPDH,TPI1,PFKM,PKM,ENO1
GO: Biological Process	GO:0016236	macroautophagy	0.0001524	0.737	0.003315	0.03004	21	313	MAP1LC3B2,LAMTOR2,VPS25,NPRL2,DYNLL1,ATP6V0B,GAPDH,CHMP2A,ATG4B,NSFL1C,MLST8,HTRA2,WDR45,ATP6V0D1,SNF8,UCHL1,TOMM7,PHF23,LAMTOR1,CHMP6,VPS28
GO: Biological Process	GO:0007346	regulation of mitotic cell cycle	0.0001529	0.7393	0.003315	0.03004	37	713	RPL26,CDK2AP2,RPS6,MAEA,NAA10,MAD2L2,LCMT1,APEX1,ANAPC11,GADD45GIP1,SIRT2,DYNLL1,CHMP2A,NSFL1C,PEBP1,CDC25B,LSM10,DCTN3,CDK4,CETN2,PHB2,PIN1,PRMT1,FSD1,PPP2R1A,PSMA7,PSMB2,PSMB3,PSMB6,PSMB7,PSMC3,PSMC4,PSMC5,PSMD3,PSMD7,PSMD8,PSMD11
GO: Biological Process	GO:0000491	small nucleolar ribonucleoprotein complex assembly	0.0001556	0.7522	0.003358	0.03043	4	11	RUVBL1,RUVBL2,SNU13,PIH1D1
GO: Biological Process	GO:2000736	regulation of stem cell differentiation	0.0001628	0.787	0.003483	0.03156	12	125	PSMA7,PSMB2,PSMB3,PSMB6,PSMB7,PSMC3,PSMC4,PSMC5,PSMD3,PSMD7,PSMD8,PSMD11
GO: Biological Process	GO:1901987	regulation of cell cycle phase transition	0.0001641	0.7933	0.003483	0.03156	29	508	RPL26,CDK2AP2,MAD2L2,LCMT1,APEX1,ANAPC11,SIRT2,DYNLL1,CDC25B,LSM10,DCTN3,CDK4,CETN2,PHB2,PRMT1,PAF1,PPP2R1A,PSMA7,PSMB2,PSMB3,PSMB6,PSMB7,PSMC3,PSMC4,PSMC5,PSMD3,PSMD7,PSMD8,PSMD11
GO: Biological Process	GO:0042276	error-prone translesion synthesis	0.0001642	0.7941	0.003483	0.03156	5	20	MAD2L2,UBA52,UBB,UBC,RFC2
GO: Biological Process	GO:0070987	error-free translesion synthesis	0.0001642	0.7941	0.003483	0.03156	5	20	UBA52,UBB,UBC,UFD1,RFC2
GO: Biological Process	GO:0098869	cellular oxidant detoxification	0.0001652	0.7985	0.003484	0.03157	11	107	SELENOW,SOD1,GPX1,GPX4,TXNDC17,PRDX2,PRDX1,PARK7,TXN,PRDX5,CCS
GO: Biological Process	GO:0061615	glycolytic process through fructose-6-phosphate	0.0001657	0.8013	0.003484	0.03157	6	31	ALDOC,GAPDH,TPI1,PFKM,PKM,ENO1
GO: Biological Process	GO:0072655	establishment of protein localization to mitochondrion	0.0001756	0.8491	0.003668	0.03324	13	145	SLC25A6,TIMM50,VPS11,PMPCA,HTRA2,AIP,SAMM50,TIMM22,TOMM7,ROMO1,FIS1,TIMM13,TIMM8B
GO: Biological Process	GO:0090501	RNA phosphodiester bond hydrolysis	0.0001768	0.8547	0.003668	0.03324	15	185	POP7,RPS21,POLR1H,APEX1,NUDT16L1,NHP2,EXOSC7,INPP5K,TRIR,TSEN34,EXOSC4,POLR2I,ENDOV,EXOSC5,RNH1
GO: Biological Process	GO:2001242	regulation of intrinsic apoptotic signaling pathway	0.0001768	0.8547	0.003668	0.03324	15	185	RPL26,RPS3,RACK1,CREB3,SOD1,NDUFS3,ERP29,HTRA2,GPX1,PARK7,UBB,TMEM161A,FIS1,BCAP31,ENO1
GO: Biological Process	GO:0006259	DNA metabolic process	0.0001906	0.9215	0.003938	0.03568	50	1080	RPS3,FANCG,MCRS1,NOP10,MAD2L2,STOML2,MPG,RPAIN,OTUB1,APEX1,CCT7,NUDT16L1,NHP2,RUVBL1,CCT5,CENPX,INPP5K,RUVBL2,BANF1,MMS19,NME1,COPS6,NSMCE1,NTHL1,GPS1,UBE2L6,CETN2,PARK7,PHB,UBA52,UBB,UBC,UFD1,COPS7B,EXOSC4,PICK1,POLR2F,POLR2H,POLR2I,POLR2L,POLE4,PPP2R1A,PPP4C,PPP5C,ENDOV,RNF113A,EXOSC5,TMEM161A,SEM1,RFC2
GO: Biological Process	GO:0034227	tRNA thio-modification	0.0001942	0.9389	0.003995	0.0362	3	5	CTU2,MOCS3,URM1
GO: Biological Process	GO:1903311	regulation of mRNA metabolic process	0.000195	0.943	0.003996	0.03621	22	342	APEX1,EXOSC7,TBRG4,UBA52,UBB,UBC,EXOSC4,RBM42,PAF1,PSMA7,PSMB2,PSMB3,PSMB6,PSMB7,PSMC3,PSMC4,PSMC5,PSMD3,PSMD7,PSMD8,EXOSC5,PSMD11
GO: Biological Process	GO:0046939	nucleotide phosphorylation	0.0002013	0.9732	0.004094	0.03709	13	147	ALDOC,SEC13,GAPDH,NME1,NME2P1,GUK1,SLC2A6,TPI1,PFKM,PGAM4,PKM,EIF6,ENO1
GO: Biological Process	GO:0006417	regulation of translation	0.0002015	0.9743	0.004094	0.03709	28	489	RPL26,RPL38,RPLP1,RPS3,RPS9,RPS14,RACK1,COA3,TRUB2,EEF1A1P5,EIF3C,EIF3G,EIF3H,EIF3I,GAPDH,EIF2B3,EIF2B2,EIF3K,TARBP2,MPV17L2,RPL13A,CDK4,TUFM,PPP1CA,C12orf65,EIF6,EIF3CL,EEF1B2
GO: Biological Process	GO:0046364	monosaccharide biosynthetic process	0.0002112	1	0.004272	0.03871	11	110	MAEA,AKR1A1,MDH2,ALDOC,AKR1B1,GAPDH,TALDO1,TKT,FAM3A,TPI1,ENO1
GO: Biological Process	GO:0043902	positive regulation of multi-organism process	0.0002122	1	0.004275	0.03874	31	567	FLOT2,NELFCD,ANXA2P2,SIRT2,CNPY3,GAPDH,CHMP2A,TARBP2,CFL1,PARK7,UBA52,UBB,UBC,UFD1,POLR2F,POLR2H,POLR2I,POLR2L,PSMA7,PSMB2,PSMB3,PSMB6,PSMB7,PSMC3,PSMC4,PSMC5,PSMD3,PSMD7,PSMD8,PSMD11,PQBP1
GO: Biological Process	GO:0034614	cellular response to reactive oxygen species	0.0002234	1	0.004472	0.04052	15	189	RPS3,RACK1,AKR1B1,STK25,APEX1,SOD1,PRDX2,PRDX1,CFL1,PARK7,TXN,PRDX5,PPP5C,ROMO1,CCS
GO: Biological Process	GO:0034248	regulation of cellular amide metabolic process	0.0002238	1	0.004472	0.04052	30	543	RPL26,RPL38,RPLP1,RPS3,RPS9,RPS14,RACK1,COA3,TRUB2,EEF1A1P5,ORMDL2,EIF3C,EIF3G,EIF3H,EIF3I,GAPDH,EIF2B3,EIF2B2,EIF3K,TARBP2,MPV17L2,RPL13A,CDK4,TUFM,PIN1,PPP1CA,C12orf65,EIF6,EIF3CL,EEF1B2
GO: Biological Process	GO:0098660	inorganic ion transmembrane transport	0.0002268	1	0.004513	0.04089	50	1088	UQCRHL,ATP5F1EP2,STOML2,SLC25A4,ANXA2P2,GADD45GIP1,PHPT1,UQCC3,ATOX1,ATP5F1A,ATP5F1B,ATP5MC2,ATP5ME,ATP6V0B,ATP6AP1,ATP5PO,SPG7,FXYD6,NDUFA8,NDUFB2,NDUFB7,NDUFB8,NDUFB9,NDUFB10,NDUFS3,NDUFV1,NDUFS5,NDUFS8,NDUFV3,PMPCA,UQCRFS1P1,CORO1A,ATP6V0D1,SLC2A6,CD63,PARK7,PHB2,PHB,UQCRC1,UQCRH,STX8,NDUFB11,COX4I1,COX6B1,ATP5MF,PRKCZ,NDUFS7,SMDT1,DBI,SDHAF2
GO: Biological Process	GO:0070585	protein localization to mitochondrion	0.0002301	1	0.00456	0.04132	13	149	SLC25A6,TIMM50,VPS11,PMPCA,HTRA2,AIP,SAMM50,TIMM22,TOMM7,ROMO1,FIS1,TIMM13,TIMM8B
GO: Biological Process	GO:0044772	mitotic cell cycle phase transition	0.0002319	1	0.004576	0.04147	33	622	RPL26,CDK2AP2,RPS6,PPME1,MAD2L2,LCMT1,APEX1,ANAPC11,SIRT2,DYNLL1,CHMP2A,CDC25B,LSM10,DCTN3,CDK4,CETN2,PHB2,PRMT1,POLE4,PPP2R1A,PSMA7,PSMB2,PSMB3,PSMB6,PSMB7,FBXL12,PSMC3,PSMC4,PSMC5,PSMD3,PSMD7,PSMD8,PSMD11
GO: Biological Process	GO:0033209	tumor necrosis factor-mediated signaling pathway	0.0002451	1	0.004818	0.04366	14	170	RACK1,TXNDC17,PSMA7,PSMB2,PSMB3,PSMB6,PSMB7,PSMC3,PSMC4,PSMC5,PSMD3,PSMD7,PSMD8,PSMD11
GO: Biological Process	GO:1905330	regulation of morphogenesis of an epithelium	0.0002505	1	0.004903	0.04442	15	191	PHB2,AP2M1,AP2S1,PSMA7,PSMB2,PSMB3,PSMB6,PSMB7,PSMC3,PSMC4,PSMC5,PSMD3,PSMD7,PSMD8,PSMD11
GO: Biological Process	GO:0000470	maturation of LSU-rRNA	0.0002667	1	0.005157	0.04673	5	22	NHP2,RPL10A,SNU13,RPL35,RPL7A
GO: Biological Process	GO:0031163	metallo-sulfur cluster assembly	0.0002667	1	0.005157	0.04673	5	22	CIAO2B,MMS19,BOLA2B,CIAPIN1,NUBP2
GO: Biological Process	GO:0016226	iron-sulfur cluster assembly	0.0002667	1	0.005157	0.04673	5	22	CIAO2B,MMS19,BOLA2B,CIAPIN1,NUBP2
GO: Biological Process	GO:0018279	protein N-linked glycosylation via asparagine	0.0002824	1	0.005441	0.0493	6	34	RPN1,RPN2,OST4,DPM2,DAD1,DDOST
GO: Biological Process	GO:0038061	NIK/NF-kappaB signaling	0.0003308	1	0.006341	0.05746	15	196	RPS3,PRDX1,PPP4C,PSMA7,PSMB2,PSMB3,PSMB6,PSMB7,PSMC3,PSMC4,PSMC5,PSMD3,PSMD7,PSMD8,PSMD11
GO: Biological Process	GO:0018196	peptidyl-asparagine modification	0.0003331	1	0.006341	0.05746	6	35	RPN1,RPN2,OST4,DPM2,DAD1,DDOST
GO: Biological Process	GO:0010499	proteasomal ubiquitin-independent protein catabolic process	0.0003331	1	0.006341	0.05746	5	23	PSMA7,PSMB2,PSMB3,PSMB6,PSMB7
GO: Biological Process	GO:0006354	DNA-templated transcription, elongation	0.0003622	1	0.006868	0.06223	11	117	POLR1H,NELFCD,ELOF1,TCEA2,ELOB,ADRM1,POLR2F,POLR2H,POLR2I,POLR2L,PAF1
GO: Biological Process	GO:1901991	negative regulation of mitotic cell cycle phase transition	0.0003647	1	0.006888	0.06241	18	264	RPL26,CDK2AP2,MAD2L2,LCMT1,CDK4,PRMT1,PSMA7,PSMB2,PSMB3,PSMB6,PSMB7,PSMC3,PSMC4,PSMC5,PSMD3,PSMD7,PSMD8,PSMD11
GO: Biological Process	GO:0000278	mitotic cell cycle	0.0003739	1	0.00698	0.06324	49	1083	RPL26,CDK2AP2,RPS6,MAEA,NAA10,TUBB3,PPME1,MAD2L2,LCMT1,CENPT,APEX1,ANAPC11,GADD45GIP1,SIRT2,DYNLL1,CHMP2A,BANF1,NSFL1C,TUBA1C,PEBP1,CDC25B,LSM10,DCTN3,CDK4,CETN2,CFL1,PHB2,NCAPH2,PIN1,PRMT1,PHF23,POLE4,FSD1,PPP2R1A,PPP5C,PSMA7,PSMB2,PSMB3,PSMB6,PSMB7,FBXL12,PSMC3,PSMC4,PSMC5,PSMD3,PSMD7,PSMD8,PSMD11,CHMP6
GO: Biological Process	GO:0140014	mitotic nuclear division	0.0003739	1	0.00698	0.06324	49	1083	RPL26,CDK2AP2,RPS6,MAEA,NAA10,TUBB3,PPME1,MAD2L2,LCMT1,CENPT,APEX1,ANAPC11,GADD45GIP1,SIRT2,DYNLL1,CHMP2A,BANF1,NSFL1C,TUBA1C,PEBP1,CDC25B,LSM10,DCTN3,CDK4,CETN2,CFL1,PHB2,NCAPH2,PIN1,PRMT1,PHF23,POLE4,FSD1,PPP2R1A,PPP5C,PSMA7,PSMB2,PSMB3,PSMB6,PSMB7,FBXL12,PSMC3,PSMC4,PSMC5,PSMD3,PSMD7,PSMD8,PSMD11,CHMP6
GO: Biological Process	GO:1903047	mitotic cell cycle process	0.0003739	1	0.00698	0.06324	49	1083	RPL26,CDK2AP2,RPS6,MAEA,NAA10,TUBB3,PPME1,MAD2L2,LCMT1,CENPT,APEX1,ANAPC11,GADD45GIP1,SIRT2,DYNLL1,CHMP2A,BANF1,NSFL1C,TUBA1C,PEBP1,CDC25B,LSM10,DCTN3,CDK4,CETN2,CFL1,PHB2,NCAPH2,PIN1,PRMT1,PHF23,POLE4,FSD1,PPP2R1A,PPP5C,PSMA7,PSMB2,PSMB3,PSMB6,PSMB7,FBXL12,PSMC3,PSMC4,PSMC5,PSMD3,PSMD7,PSMD8,PSMD11,CHMP6
GO: Biological Process	GO:0046782	regulation of viral transcription	0.0003767	1	0.007005	0.06347	8	65	NELFCD,INPP5K,TARBP2,POLR2F,POLR2H,POLR2I,POLR2L,PSMC3
GO: Biological Process	GO:0031118	rRNA pseudouridine synthesis	0.0003805	1	0.007049	0.06387	3	6	NOP10,NHP2,RPUSD2
GO: Biological Process	GO:0034599	cellular response to oxidative stress	0.0003974	1	0.007333	0.06645	21	336	RPS3,RACK1,AKR1B1,STK25,ZNF622,APEX1,MSRB2,SIRT2,SOD1,HTRA2,GPX1,PRDX2,PRDX1,CFL1,PARK7,TXN,PRDX5,PPP5C,ROMO1,TMEM161A,CCS
GO: Biological Process	GO:0044770	cell cycle phase transition	0.0003991	1	0.007337	0.06648	34	668	RPL26,CDK2AP2,RPS6,PPME1,MAD2L2,LCMT1,APEX1,ANAPC11,SIRT2,DYNLL1,CHMP2A,CDC25B,LSM10,DCTN3,CDK4,CETN2,PHB2,PRMT1,POLE4,PAF1,PPP2R1A,PSMA7,PSMB2,PSMB3,PSMB6,PSMB7,FBXL12,PSMC3,PSMC4,PSMC5,PSMD3,PSMD7,PSMD8,PSMD11
GO: Biological Process	GO:0042176	regulation of protein catabolic process	0.0004115	1	0.007536	0.06828	24	410	RACK1,MAD2L2,ANXA2P2,SGTA,SIRT2,HSP90AB2P,VPS11,ATG4B,GPX1,OAZ1,SNF8,PARK7,HSPBP1,PHB,UBB,DDA1,PIN1,HSP90AB3P,PSMC4,PSMD3,CHMP6,UBXN1,BCAP31,VPS28
GO: Biological Process	GO:0032802	low-density lipoprotein particle receptor catabolic process	0.0004421	1	0.008066	0.07309	4	14	ANXA2P2,AP2M1,AP2S1,CLTA
GO: Biological Process	GO:0006007	glucose catabolic process	0.0004555	1	0.00828	0.07503	6	37	ALDOC,GAPDH,TPI1,PFKM,PKM,ENO1
GO: Biological Process	GO:0000731	DNA synthesis involved in DNA repair	0.0005016	1	0.009072	0.0822	7	52	MAD2L2,UBE2L6,UBA52,UBB,UBC,UFD1,RFC2
GO: Biological Process	GO:0019430	removal of superoxide radicals	0.0005028	1	0.009072	0.0822	5	25	SOD1,PRDX2,PRDX1,PARK7,CCS
GO: Biological Process	GO:0098754	detoxification	0.0005643	1	0.01012	0.09173	12	143	AKR1A1,SELENOW,SOD1,GPX1,GPX4,TXNDC17,PRDX2,PRDX1,PARK7,TXN,PRDX5,CCS
GO: Biological Process	GO:0006508	proteolysis	0.0005674	1	0.01012	0.09173	76	1915	CLPP,RPS3,MAEA,ACTB,RACK1,MAP1LC3B2,MCRS1,SDF2,STOML2,ANXA2P2,SGTA,OTUB1,APEH,ANAPC11,VPS25,NPRL2,SIRT2,SPINT2,RUVBL1,HSP90AB2P,EIF3H,SPG7,GAPDH,AUP1,ATG4B,NSFL1C,PMPCA,COPS6,HTRA2,ADRM1,GPS1,GPX1,WDR45,PEBP1,SNF8,UBE2L6,CFL1,PARK7,PEPD,HSPBP1,UBA52,UBB,UBC,DDA1,UCHL1,UFD1,COPS7B,TOLLIP,PRDX5,TMUB2,HSP90AB3P,PHF23,POR,FBXO44,CSTB,ZFAND2B,PSMA7,PSMB2,PSMB3,PSMB6,PSMB7,FBXL12,PSMC3,PSMC4,PSMC5,PSMD…
GO: Biological Process	GO:0046365	monosaccharide catabolic process	0.0005674	1	0.01012	0.09173	8	69	AKR1A1,ALDOC,GAPDH,TPI1,PFKM,PKM,ENO1,DCXR
GO: Biological Process	GO:0060828	regulation of canonical Wnt signaling pathway	0.000581	1	0.01033	0.09358	19	298	MAD2L2,RUVBL1,RUVBL2,PFDN5,PIN1,PPP1CA,PSMA7,PSMB2,PSMB3,PSMB6,PSMB7,PSMC3,PSMC4,PSMC5,PSMD3,PSMD7,PSMD8,PSMD11,SDHAF2
GO: Biological Process	GO:0070925	organelle assembly	0.0006005	1	0.01064	0.09636	43	934	RPL38,RPLP0,RPS3,RPS5,RPS14,RPS15,ACTG1,RPS28,IFT43,MAP1LC3B2,CENPT,TMEM138,VPS25,NPRL2,DYNLL1,VPS11,CENPX,CHMP2A,ATG4B,NSFL1C,MPV17L2,CORO1A,WDR45,ATP6V0D1,DCTN3,SNF8,CETN2,TRAPPC6A,IFT22,CCDC28B,PHF23,PPP2R1A,MRPS11,RPLP0P6,EIF6,ERAL1,MRPL20,CHMP6,PQBP1,ARPC2,MRPS2,MRTO4,VPS28
GO: Biological Process	GO:0006399	tRNA metabolic process	0.0006103	1	0.01077	0.09757	14	186	POP7,CTU2,LAGE3,FARSA,TRMT1,TRUB2,EXOSC7,MOCS3,HSD17B10,TSEN34,URM1,QARS1,DALRD3,QTRT1
GO: Biological Process	GO:0098655	cation transmembrane transport	0.0006316	1	0.0111	0.1006	50	1138	UQCRHL,ATP5F1EP2,STOML2,SLC25A4,ANXA2P2,GADD45GIP1,PHPT1,UQCC3,ATOX1,ATP5F1A,ATP5F1B,ATP5MC2,ATP5ME,ATP6V0B,ATP6AP1,ATP5PO,SPG7,FXYD6,NDUFA8,NDUFB2,NDUFB7,NDUFB8,NDUFB9,NDUFB10,NDUFS3,NDUFV1,NDUFS5,NDUFS8,NDUFV3,PMPCA,UQCRFS1P1,CORO1A,ATP6V0D1,SLC2A6,CD63,CFL1,PARK7,PHB2,PHB,UQCRC1,UQCRH,NDUFB11,COX4I1,COX6B1,ATP5MF,PRKCZ,NDUFS7,SMDT1,DBI,SDHAF2
GO: Biological Process	GO:0006165	nucleoside diphosphate phosphorylation	0.000639	1	0.01119	0.1014	12	145	ALDOC,SEC13,GAPDH,NME1,NME2P1,SLC2A6,TPI1,PFKM,PGAM4,PKM,EIF6,ENO1
GO: Biological Process	GO:0030177	positive regulation of Wnt signaling pathway	0.0006435	1	0.01123	0.1018	14	187	RUVBL1,PIN1,PSMA7,PSMB2,PSMB3,PSMB6,PSMB7,PSMC3,PSMC4,PSMC5,PSMD3,PSMD7,PSMD8,PSMD11
GO: Biological Process	GO:0015866	ADP transport	0.0006524	1	0.01135	0.1028	3	7	SLC25A4,SLC25A5,SLC25A6
GO: Biological Process	GO:0090305	nucleic acid phosphodiester bond hydrolysis	0.000662	1	0.01147	0.104	22	374	POP7,RPS3,RPS21,POLR1H,APEX1,NUDT16L1,NHP2,EXOSC7,INPP5K,NME1,NTHL1,UBA52,UBB,UBC,TRIR,TSEN34,EXOSC4,POLR2I,ENDOV,EXOSC5,RFC2,RNH1
GO: Biological Process	GO:0006368	transcription elongation from RNA polymerase II promoter	0.0007214	1	0.01246	0.1129	9	89	NELFCD,ELOF1,ELOB,ADRM1,POLR2F,POLR2H,POLR2I,POLR2L,PAF1
GO: Biological Process	GO:2000157	negative regulation of ubiquitin-specific protease activity	0.0007653	1	0.01276	0.1156	2	2	PARK7,UBXN1
GO: Biological Process	GO:0005999	xylulose biosynthetic process	0.0007653	1	0.01276	0.1156	2	2	TALDO1,TKT
GO: Biological Process	GO:0097238	cellular response to methylglyoxal	0.0007653	1	0.01276	0.1156	2	2	AKR1B1,PARK7
GO: Biological Process	GO:2000277	positive regulation of oxidative phosphorylation uncoupler activity	0.0007653	1	0.01276	0.1156	2	2	SLC25A4,PARK7
GO: Biological Process	GO:0018307	enzyme active site formation	0.0007653	1	0.01276	0.1156	2	2	MOCS3,PARK7
GO: Biological Process	GO:0072334	UDP-galactose transmembrane transport	0.0007653	1	0.01276	0.1156	2	2	SLC35A2,SLC35B1
GO: Biological Process	GO:0015786	UDP-glucose transmembrane transport	0.0007653	1	0.01276	0.1156	2	2	SLC35C2,SLC35B1
GO: Biological Process	GO:2000814	positive regulation of barbed-end actin filament capping	0.0007653	1	0.01276	0.1156	2	2	CFL1,ARPC2
GO: Biological Process	GO:0046166	glyceraldehyde-3-phosphate biosynthetic process	0.0007653	1	0.01276	0.1156	2	2	TKT,TPI1
GO: Biological Process	GO:1903094	negative regulation of protein K48-linked deubiquitination	0.0007653	1	0.01276	0.1156	2	2	PARK7,UBXN1
GO: Biological Process	GO:0006979	response to oxidative stress	0.0007942	1	0.0132	0.1196	27	507	RPS3,RACK1,AKR1B1,STK25,ZNF622,APEX1,MSRB2,SIRT2,ATOX1,SOD1,NDUFS8,HTRA2,GPX1,GPX4,PRDX2,GSS,PRDX1,CFL1,PARK7,HMOX2,TXN,PRDX5,TXN2,PPP5C,ROMO1,TMEM161A,CCS
GO: Biological Process	GO:2001244	positive regulation of intrinsic apoptotic signaling pathway	0.0008295	1	0.01374	0.1245	8	73	RPL26,RPS3,RACK1,SOD1,PARK7,UBB,FIS1,BCAP31
GO: Biological Process	GO:0010608	posttranscriptional regulation of gene expression	0.0008345	1	0.01377	0.1248	53	1241	RPL26,RPL38,RPLP1,RPS3,RPS9,RPS14,RACK1,SEC13,COA3,APEX1,TRUB2,EEF1A1P5,EIF3C,EIF3G,EIF3H,EIF3I,EXOSC7,GAPDH,EIF2B3,EIF2B2,EIF3K,TARBP2,MPV17L2,RPL13A,CDK4,TBRG4,TUFM,UBA52,UBB,UBC,EXOSC4,POLR2F,POLR2H,POLR2I,POLR2L,PPP1CA,C12orf65,PSMA7,PSMB2,PSMB3,PSMB6,PSMB7,PSMC3,PSMC4,PSMC5,PSMD3,PSMD7,PSMD8,EXOSC5,PSMD11,EIF6,EIF3CL,EEF1B2
GO: Biological Process	GO:0006403	RNA localization	0.000844	1	0.01388	0.1258	16	237	RPS15,NOP10,SEC13,CCT7,NHP2,RUVBL1,CCT5,NXT1,RUVBL2,CETN2,THOC6,EIF6,PIH1D1,SEM1,NUTF2,DDX39A
GO: Biological Process	GO:1901988	negative regulation of cell cycle phase transition	0.0008594	1	0.01409	0.1276	18	284	RPL26,CDK2AP2,MAD2L2,LCMT1,CDK4,PRMT1,PSMA7,PSMB2,PSMB3,PSMB6,PSMB7,PSMC3,PSMC4,PSMC5,PSMD3,PSMD7,PSMD8,PSMD11
GO: Biological Process	GO:0071450	cellular response to oxygen radical	0.0008694	1	0.01412	0.1279	5	28	SOD1,PRDX2,PRDX1,PARK7,CCS
GO: Biological Process	GO:0071451	cellular response to superoxide	0.0008694	1	0.01412	0.1279	5	28	SOD1,PRDX2,PRDX1,PARK7,CCS
GO: Biological Process	GO:0062012	regulation of small molecule metabolic process	0.0008701	1	0.01412	0.1279	26	484	MAEA,LCMT1,SEC13,SOD1,INPP5K,OAZ1,SLC2A6,FAM3A,PARK7,POR,PPP1CA,PSMA7,PSMB2,PSMB3,PSMB6,PSMB7,PSMC3,PSMC4,PSMC5,PSMD3,PSMD7,PSMD8,PSMD11,DBI,EIF6,ENO1
GO: Biological Process	GO:0009132	nucleoside diphosphate metabolic process	0.0009089	1	0.0147	0.1332	13	172	ALDOC,SEC13,GAPDH,NME1,NME2P1,GUK1,SLC2A6,TPI1,PFKM,PGAM4,PKM,EIF6,ENO1
GO: Biological Process	GO:0016073	snRNA metabolic process	0.0009161	1	0.01476	0.1338	6	42	NOP10,NHP2,EXOSC7,EXOSC4,EXOSC5,INTS11
GO: Biological Process	GO:0045930	negative regulation of mitotic cell cycle	0.0009337	1	0.015	0.1359	21	359	RPL26,CDK2AP2,RPS6,NAA10,MAD2L2,LCMT1,GADD45GIP1,CDK4,PRMT1,PSMA7,PSMB2,PSMB3,PSMB6,PSMB7,PSMC3,PSMC4,PSMC5,PSMD3,PSMD7,PSMD8,PSMD11
GO: Biological Process	GO:0045324	late endosome to vacuole transport	0.0009849	1	0.01566	0.1419	4	17	VPS25,CHMP2A,SNF8,VPS28
GO: Biological Process	GO:0016074	snoRNA metabolic process	0.0009849	1	0.01566	0.1419	4	17	NUDT16L1,EXOSC4,RNF113A,EXOSC5
GO: Biological Process	GO:0001522	pseudouridine synthesis	0.0009849	1	0.01566	0.1419	4	17	NOP10,NHP2,TRUB2,RPUSD2
GO: Biological Process	GO:0009438	methylglyoxal metabolic process	0.001023	1	0.01605	0.1455	3	8	HAGH,TPI1,PARK7
GO: Biological Process	GO:0034475	U4 snRNA 3'-end processing	0.001023	1	0.01605	0.1455	3	8	EXOSC7,EXOSC4,EXOSC5
GO: Biological Process	GO:0032511	late endosome to vacuole transport via multivesicular body sorting pathway	0.001023	1	0.01605	0.1455	3	8	VPS25,SNF8,VPS28
GO: Biological Process	GO:0019682	glyceraldehyde-3-phosphate metabolic process	0.001023	1	0.01605	0.1455	3	8	TALDO1,TKT,TPI1
GO: Biological Process	GO:0038093	Fc receptor signaling pathway	0.001052	1	0.01647	0.1492	16	242	ACTB,ACTG1,BRK1,PSMA7,PSMB2,PSMB3,PSMB6,PSMB7,PSMC3,PSMC4,PSMC5,PSMD3,PSMD7,PSMD8,PSMD11,ARPC2
GO: Biological Process	GO:0000209	protein polyubiquitination	0.001084	1	0.01688	0.1529	19	314	OTUB1,ANAPC11,UBA52,UBB,UBC,FBXO44,PSMA7,PSMB2,PSMB3,PSMB6,PSMB7,FBXL12,PSMC3,PSMC4,PSMC5,PSMD3,PSMD7,PSMD8,PSMD11
GO: Biological Process	GO:0046835	carbohydrate phosphorylation	0.001086	1	0.01688	0.1529	7	59	ALDOC,NAGK,GAPDH,TPI1,PFKM,PKM,ENO1
GO: Biological Process	GO:0043687	post-translational protein modification	0.00111	1	0.01721	0.1559	21	364	LCMT1,COPS6,ELOB,GPS1,DDA1,COPS7B,FBXO44,PSMA7,PSMB2,PSMB3,PSMB6,PSMB7,FBXL12,PSMC3,PSMC4,PSMC5,PSMD3,PSMD7,PSMD8,PSMD11,RABGGTA
GO: Biological Process	GO:0016055	Wnt signaling pathway	0.001134	1	0.01752	0.1587	28	546	RACK1,MAD2L2,RUVBL1,RUVBL2,PFDN5,UBA52,UBB,UBC,AP2M1,AP2S1,PIN1,PORCN,PAF1,PPP1CA,PPP2R1A,PSMA7,PSMB2,PSMB3,PSMB6,PSMB7,PSMC3,PSMC4,PSMC5,PSMD3,PSMD7,PSMD8,PSMD11,SDHAF2
GO: Biological Process	GO:0005996	monosaccharide metabolic process	0.001168	1	0.01798	0.1629	19	316	MAEA,AKR1A1,MDH2,ALDOC,AKR1B1,LCMT1,GAPDH,INPP5K,TALDO1,TKT,FAM3A,TPI1,PFKM,SLC35A2,PKM,PMM1,PPP1CA,ENO1,DCXR
GO: Biological Process	GO:1900117	regulation of execution phase of apoptosis	0.001177	1	0.01807	0.1637	6	44	RPS3,SIRT2,MTRNR2L2,MTRNR2L1,MTRNR2L12,MTRNR2L10
GO: Biological Process	GO:0198738	cell-cell signaling by wnt	0.001197	1	0.01832	0.166	28	548	RACK1,MAD2L2,RUVBL1,RUVBL2,PFDN5,UBA52,UBB,UBC,AP2M1,AP2S1,PIN1,PORCN,PAF1,PPP1CA,PPP2R1A,PSMA7,PSMB2,PSMB3,PSMB6,PSMB7,PSMC3,PSMC4,PSMC5,PSMD3,PSMD7,PSMD8,PSMD11,SDHAF2
GO: Biological Process	GO:0036258	multivesicular body assembly	0.001205	1	0.01833	0.1661	5	30	VPS25,CHMP2A,SNF8,CHMP6,VPS28
GO: Biological Process	GO:0000027	ribosomal large subunit assembly	0.001205	1	0.01833	0.1661	5	30	RPL38,RPLP0,RPLP0P6,MRPL20,MRTO4
GO: Biological Process	GO:0043900	regulation of multi-organism process	0.001224	1	0.01855	0.1681	38	825	CREB3,FLOT2,NELFCD,ANXA2P2,SIRT2,CNPY3,GAPDH,INPP5K,CHMP2A,BANF1,TARBP2,PRDX2,FAM3A,SNF8,CFL1,PARK7,UBA52,UBB,UBC,UFD1,POLR2F,POLR2H,POLR2I,POLR2L,PPP2R1A,PSMA7,PSMB2,PSMB3,PSMB6,PSMB7,PSMC3,PSMC4,PSMC5,PSMD3,PSMD7,PSMD8,PSMD11,PQBP1
GO: Biological Process	GO:0007059	chromosome segregation	0.001228	1	0.01855	0.1681	20	342	RPS3,NAA10,MAD2L2,LCMT1,CENPT,SLC25A5,NTMT1,ANAPC11,SIRT2,CIAO2B,CENPX,CHMP2A,BANF1,MMS19,PHB2,NCAPH2,PHF23,PPP1R7,PPP2R1A,CHMP6
GO: Biological Process	GO:0031468	nuclear envelope reassembly	0.001239	1	0.01861	0.1686	4	18	CHMP2A,BANF1,NSFL1C,PPP2R1A
GO: Biological Process	GO:0090151	establishment of protein localization to mitochondrial membrane	0.001239	1	0.01861	0.1686	4	18	SAMM50,TIMM22,ROMO1,TIMM13
GO: Biological Process	GO:0021762	substantia nigra development	0.001328	1	0.01987	0.1801	6	45	ACTB,SIRT2,DYNLL1,NDUFS3,POTEE,COX6B1
GO: Biological Process	GO:0036257	multivesicular body organization	0.001405	1	0.02091	0.1894	5	31	VPS25,CHMP2A,SNF8,CHMP6,VPS28
GO: Biological Process	GO:0000303	response to superoxide	0.001405	1	0.02091	0.1894	5	31	SOD1,PRDX2,PRDX1,PARK7,CCS
GO: Biological Process	GO:0019318	hexose metabolic process	0.001432	1	0.02124	0.1925	17	273	MAEA,AKR1A1,MDH2,ALDOC,AKR1B1,LCMT1,GAPDH,INPP5K,FAM3A,TPI1,PFKM,SLC35A2,PKM,PMM1,PPP1CA,ENO1,DCXR
GO: Biological Process	GO:0030490	maturation of SSU-rRNA	0.001492	1	0.02206	0.1999	6	46	RPS8,RPS14,RPS16,RPS21,RPS28,MRPS11
GO: Biological Process	GO:0000305	response to oxygen radical	0.001629	1	0.02401	0.2175	5	32	SOD1,PRDX2,PRDX1,PARK7,CCS
GO: Biological Process	GO:0035722	interleukin-12-mediated signaling pathway	0.001672	1	0.0245	0.222	6	47	RPLP0,SOD1,TALDO1,AIP,CFL1,BOLA2B
GO: Biological Process	GO:0060070	canonical Wnt signaling pathway	0.001672	1	0.0245	0.222	20	351	MAD2L2,RUVBL1,RUVBL2,PFDN5,PIN1,PORCN,PPP1CA,PSMA7,PSMB2,PSMB3,PSMB6,PSMB7,PSMC3,PSMC4,PSMC5,PSMD3,PSMD7,PSMD8,PSMD11,SDHAF2
GO: Biological Process	GO:0060548	negative regulation of cell death	0.001704	1	0.0249	0.2256	50	1192	RPS6,MAEA,APBB3,RACK1,AKR1B1,CREB3,SLC25A4,SLC25A5,MIEN1,NAA38,SIRT2,ATOX1,SNCG,SOD1,GAPDH,CHMP2A,NDUFS3,MYDGF,HTRA2,GPX1,GPX4,PRDX2,CORO1A,CFL1,PARK7,PHB2,MTRNR2L2,MTRNR2L1,PHB,TXN,UBA52,UBB,UBC,PIN1,PRDX5,PICK1,POR,THOC6,PPP5C,PRKCZ,DAD1,PSMC5,MTRNR2L12,MTRNR2L10,PTMA,TMEM161A,CIAPIN1,QARS1,PIH1D1,ENO1
GO: Biological Process	GO:0007032	endosome organization	0.001777	1	0.02588	0.2345	8	82	VPS25,VPS11,CHMP2A,SNF8,LAMTOR1,CHMP6,PLEKHJ1,VPS28
GO: Biological Process	GO:0006090	pyruvate metabolic process	0.001861	1	0.02696	0.2443	12	164	ALDOC,SEC13,GAPDH,BSG,SLC2A6,HAGH,TPI1,PFKM,PGAM4,PKM,EIF6,ENO1
GO: Biological Process	GO:0008631	intrinsic apoptotic signaling pathway in response to oxidative stress	0.001867	1	0.02696	0.2443	6	48	STK25,ZNF622,SOD1,HTRA2,GPX1,PARK7
GO: Biological Process	GO:0034661	ncRNA catabolic process	0.001877	1	0.02696	0.2443	5	33	NUDT16L1,EXOSC7,TRIR,EXOSC4,EXOSC5
GO: Biological Process	GO:0043928	exonucleolytic catabolism of deadenylated mRNA	0.001877	1	0.02696	0.2443	5	33	LSM2,EXOSC7,LSM7,EXOSC4,EXOSC5
GO: Biological Process	GO:0016075	rRNA catabolic process	0.001879	1	0.02696	0.2443	4	20	EXOSC7,TRIR,EXOSC4,EXOSC5
GO: Biological Process	GO:0002218	activation of innate immune response	0.001921	1	0.02748	0.249	19	330	FLOT2,CNPY3,UBA52,UBB,UBC,UFD1,PSMA7,PSMB2,PSMB3,PSMB6,PSMB7,PSMC3,PSMC4,PSMC5,PSMD3,PSMD7,PSMD8,PSMD11,PQBP1
GO: Biological Process	GO:0030111	regulation of Wnt signaling pathway	0.001942	1	0.0277	0.251	21	381	RACK1,MAD2L2,RUVBL1,RUVBL2,PFDN5,PIN1,PPP1CA,PPP2R1A,PSMA7,PSMB2,PSMB3,PSMB6,PSMB7,PSMC3,PSMC4,PSMC5,PSMD3,PSMD7,PSMD8,PSMD11,SDHAF2
GO: Biological Process	GO:0071349	cellular response to interleukin-12	0.002079	1	0.02957	0.2679	6	49	RPLP0,SOD1,TALDO1,AIP,CFL1,BOLA2B
GO: Biological Process	GO:0110096	cellular response to aldehyde	0.002104	1	0.02965	0.2687	3	10	AKR1A1,AKR1B1,PARK7
GO: Biological Process	GO:0034427	nuclear-transcribed mRNA catabolic process, exonucleolytic, 3'-5'	0.002104	1	0.02965	0.2687	3	10	EXOSC7,EXOSC4,EXOSC5
GO: Biological Process	GO:0000338	protein deneddylation	0.002104	1	0.02965	0.2687	3	10	COPS6,GPS1,COPS7B
GO: Biological Process	GO:0031120	snRNA pseudouridine synthesis	0.002192	1	0.03063	0.2775	2	3	NOP10,NHP2
GO: Biological Process	GO:0051595	response to methylglyoxal	0.002192	1	0.03063	0.2775	2	3	AKR1B1,PARK7
GO: Biological Process	GO:1903093	regulation of protein K48-linked deubiquitination	0.002192	1	0.03063	0.2775	2	3	PARK7,UBXN1
GO: Biological Process	GO:0010948	negative regulation of cell cycle process	0.00227	1	0.03158	0.2862	21	386	RPL26,CDK2AP2,NAA10,MAD2L2,ZNHIT1,LCMT1,CHMP2A,CDK4,PRMT1,PSMA7,PSMB2,PSMB3,PSMB6,PSMB7,PSMC3,PSMC4,PSMC5,PSMD3,PSMD7,PSMD8,PSMD11
GO: Biological Process	GO:0006096	glycolytic process	0.002274	1	0.03158	0.2862	10	125	ALDOC,SEC13,GAPDH,SLC2A6,TPI1,PFKM,PGAM4,PKM,EIF6,ENO1
GO: Biological Process	GO:0002758	innate immune response-activating signal transduction	0.00228	1	0.03158	0.2862	18	310	FLOT2,CNPY3,UBA52,UBB,UBC,UFD1,PSMA7,PSMB2,PSMB3,PSMB6,PSMB7,PSMC3,PSMC4,PSMC5,PSMD3,PSMD7,PSMD8,PSMD11
GO: Biological Process	GO:0048285	organelle fission	0.002329	1	0.03218	0.2915	53	1301	RPL26,CDK2AP2,RPS6,MAEA,NAA10,TUBB3,PPME1,MAD2L2,LCMT1,CENPT,APEX1,ANAPC11,GADD45GIP1,SIRT2,DYNLL1,CENPX,CHMP2A,BANF1,NSFL1C,TUBA1C,PEBP1,CDC25B,LSM10,DCTN3,CDK4,CETN2,CFL1,PHB2,NCAPH2,UBB,PIN1,PRMT1,PHF23,POLE4,FSD1,PPP2R1A,PPP5C,PSMA7,PSMB2,PSMB3,PSMB6,PSMB7,FBXL12,PSMC3,PSMC4,PSMC5,PSMD3,PSMD7,PSMD8,PSMD11,ACOT8,CHMP6,FIS1
GO: Biological Process	GO:0051092	positive regulation of NF-kappaB transcription factor activity	0.002374	1	0.03271	0.2964	25	493	RPS3,FLOT2,CARD19,TMEM101,RNF25,PRDX1,UBA52,UBB,UBC,PPP4C,PPP5C,PRKCZ,PSMA7,PSMB2,PSMB3,PSMB6,PSMB7,PSMC3,PSMC4,PSMC5,PSMD3,PSMD7,PSMD8,PSMD11,NKIRAS2
GO: Biological Process	GO:0006757	ATP generation from ADP	0.002411	1	0.03312	0.3001	10	126	ALDOC,SEC13,GAPDH,SLC2A6,TPI1,PFKM,PGAM4,PKM,EIF6,ENO1
GO: Biological Process	GO:0000462	maturation of SSU-rRNA from tricistronic rRNA transcript (SSU-rRNA, 5.8S rRNA, LSU-rRNA)	0.002455	1	0.03353	0.3038	5	35	RPS8,RPS14,RPS16,RPS21,MRPS11
GO: Biological Process	GO:0042168	heme metabolic process	0.002455	1	0.03353	0.3038	5	35	ALAS1,SLC25A39,BLVRB,HMOX2,UROD
GO: Biological Process	GO:0006081	cellular aldehyde metabolic process	0.0025	1	0.03405	0.3086	7	68	AKR1A1,TALDO1,TKT,HAGH,TPI1,PARK7,GRHPR
GO: Biological Process	GO:0038095	Fc-epsilon receptor signaling pathway	0.002511	1	0.0341	0.309	12	170	PSMA7,PSMB2,PSMB3,PSMB6,PSMB7,PSMC3,PSMC4,PSMC5,PSMD3,PSMD7,PSMD8,PSMD11
GO: Biological Process	GO:0070671	response to interleukin-12	0.002558	1	0.03465	0.3139	6	51	RPLP0,SOD1,TALDO1,AIP,CFL1,BOLA2B
GO: Biological Process	GO:0009135	purine nucleoside diphosphate metabolic process	0.002646	1	0.03563	0.3228	11	149	ALDOC,SEC13,GAPDH,GUK1,SLC2A6,TPI1,PFKM,PGAM4,PKM,EIF6,ENO1
GO: Biological Process	GO:0009179	purine ribonucleoside diphosphate metabolic process	0.002646	1	0.03563	0.3228	11	149	ALDOC,SEC13,GAPDH,GUK1,SLC2A6,TPI1,PFKM,PGAM4,PKM,EIF6,ENO1
GO: Biological Process	GO:0061136	regulation of proteasomal protein catabolic process	0.002674	1	0.03591	0.3254	13	194	RACK1,SGTA,SIRT2,HSP90AB2P,GPX1,PARK7,HSPBP1,UBB,DDA1,HSP90AB3P,PSMC4,UBXN1,BCAP31
GO: Biological Process	GO:0061919	process utilizing autophagic mechanism	0.002704	1	0.03601	0.3263	26	525	MAP1LC3B2,LAMTOR2,VPS25,NPRL2,SIRT2,DYNLL1,VPS11,ATP6V0B,GAPDH,CHMP2A,ATG4B,NSFL1C,MLST8,HTRA2,WDR45,ATP6V0D1,SNF8,PARK7,UCHL1,TOLLIP,TOMM7,PHF23,LAMTOR1,CHMP6,FIS1,VPS28
GO: Biological Process	GO:0006914	autophagy	0.002704	1	0.03601	0.3263	26	525	MAP1LC3B2,LAMTOR2,VPS25,NPRL2,SIRT2,DYNLL1,VPS11,ATP6V0B,GAPDH,CHMP2A,ATG4B,NSFL1C,MLST8,HTRA2,WDR45,ATP6V0D1,SNF8,PARK7,UCHL1,TOLLIP,TOMM7,PHF23,LAMTOR1,CHMP6,FIS1,VPS28
GO: Biological Process	GO:0039702	viral budding via host ESCRT complex	0.002717	1	0.03601	0.3263	4	22	CHMP2A,SNF8,CHMP6,VPS28
GO: Biological Process	GO:0000717	nucleotide-excision repair, DNA duplex unwinding	0.002717	1	0.03601	0.3263	4	22	CETN2,UBA52,UBB,UBC
GO: Biological Process	GO:2000272	negative regulation of signaling receptor activity	0.002719	1	0.03601	0.3263	7	69	VPS25,PARK7,MTRNR2L2,MTRNR2L1,MTRNR2L12,MTRNR2L10,CHMP6
GO: Biological Process	GO:0000291	nuclear-transcribed mRNA catabolic process, exonucleolytic	0.002788	1	0.03683	0.3337	5	36	LSM2,EXOSC7,LSM7,EXOSC4,EXOSC5
GO: Biological Process	GO:0010269	response to selenium ion	0.002834	1	0.03724	0.3374	3	11	SELENOW,MIEN1,GPX1
GO: Biological Process	GO:0045039	protein insertion into mitochondrial inner membrane	0.002834	1	0.03724	0.3374	3	11	TIMM22,ROMO1,TIMM13
GO: Biological Process	GO:0000302	response to reactive oxygen species	0.002866	1	0.03755	0.3403	16	267	RPS3,RACK1,AKR1B1,STK25,APEX1,SOD1,GPX1,PRDX2,PRDX1,CFL1,PARK7,TXN,PRDX5,PPP5C,ROMO1,CCS
GO: Biological Process	GO:0034220	ion transmembrane transport	0.002935	1	0.03835	0.3475	58	1469	UQCRHL,ATP5F1EP2,STOML2,SLC25A4,SLC25A5,SLC25A6,ANXA2P2,GADD45GIP1,PHPT1,UQCC3,ATOX1,ATP5F1A,ATP5F1B,ATP5MC2,ATP5ME,ATP6V0B,ATP6AP1,ATP5PO,SPG7,FXYD6,NDUFA8,NDUFB2,NDUFB7,NDUFB8,NDUFB9,NDUFB10,NDUFS3,NDUFV1,NDUFS5,NDUFS8,NDUFV3,PMPCA,UQCRFS1P1,CORO1A,ATP6V0D1,SLC2A6,CD63,MFSD5,CFL1,PARK7,PHB2,PHB,SLC35A2,UQCRC1,UQCRH,STX8,NDUFB11,COX4I1,COX6B1,ATP5MF,PRKCZ,NDUFS7,SMDT1,DBI,SDHAF2,SLC52A2,SLC35C2,…
GO: Biological Process	GO:0000280	nuclear division	0.002996	1	0.03904	0.3538	51	1256	RPL26,CDK2AP2,RPS6,MAEA,NAA10,TUBB3,PPME1,MAD2L2,LCMT1,CENPT,APEX1,ANAPC11,GADD45GIP1,SIRT2,DYNLL1,CENPX,CHMP2A,BANF1,NSFL1C,TUBA1C,PEBP1,CDC25B,LSM10,DCTN3,CDK4,CETN2,CFL1,PHB2,NCAPH2,UBB,PIN1,PRMT1,PHF23,POLE4,FSD1,PPP2R1A,PPP5C,PSMA7,PSMB2,PSMB3,PSMB6,PSMB7,FBXL12,PSMC3,PSMC4,PSMC5,PSMD3,PSMD7,PSMD8,PSMD11,CHMP6
GO: Biological Process	GO:0002244	hematopoietic progenitor cell differentiation	0.003053	1	0.03968	0.3595	13	197	ARMC6,PSMA7,PSMB2,PSMB3,PSMB6,PSMB7,PSMC3,PSMC4,PSMC5,PSMD3,PSMD7,PSMD8,PSMD11
GO: Biological Process	GO:0008380	RNA splicing	0.003091	1	0.04007	0.3631	24	476	PUF60,WDR83,RBMX2,LSM2,SNRPD2,LSM7,ZMAT5,FASTK,SNU13,PRPF4,LSM10,TSEN34,POLR2F,POLR2H,POLR2I,POLR2L,RBM42,THOC6,PPP2R1A,SF3B5,RNF113A,SNRNP25,PQBP1,DDX39A
GO: Biological Process	GO:0019674	NAD metabolic process	0.003115	1	0.04027	0.3649	6	53	ALDOC,GAPDH,TPI1,PFKM,PKM,ENO1
GO: Biological Process	GO:0009636	response to toxic substance	0.003138	1	0.04045	0.3666	28	586	RPS3,ACTB,AKR1A1,RACK1,PEMT,AKR1B1,STK25,SELENOW,APEX1,SOD1,RPL10A,HTRA2,GPX1,GPX4,TXNDC17,PRDX2,PRDX1,CDK4,CFL1,PARK7,TUFM,TXN,UBA52,PRDX5,PPP5C,CCS,FIS1,EEF1B2
GO: Biological Process	GO:0006296	nucleotide-excision repair, DNA incision, 5'-to lesion	0.003152	1	0.04054	0.3673	5	37	NTHL1,UBA52,UBB,UBC,RFC2
GO: Biological Process	GO:0048524	positive regulation of viral process	0.00319	1	0.04091	0.3707	9	110	NELFCD,ANXA2P2,CHMP2A,TARBP2,CFL1,POLR2F,POLR2H,POLR2I,POLR2L
GO: Biological Process	GO:0008033	tRNA processing	0.003201	1	0.04094	0.3709	10	131	POP7,CTU2,LAGE3,TRMT1,TRUB2,MOCS3,HSD17B10,TSEN34,URM1,QTRT1
GO: Biological Process	GO:0032799	low-density lipoprotein receptor particle metabolic process	0.003219	1	0.04106	0.3721	4	23	ANXA2P2,AP2M1,AP2S1,CLTA
GO: Biological Process	GO:0009185	ribonucleoside diphosphate metabolic process	0.003413	1	0.04334	0.3927	11	154	ALDOC,SEC13,GAPDH,GUK1,SLC2A6,TPI1,PFKM,PGAM4,PKM,EIF6,ENO1
GO: Biological Process	GO:0034612	response to tumor necrosis factor	0.003415	1	0.04334	0.3927	18	322	RPS3,RACK1,INPP5K,TXNDC17,GSS,CFL1,PSMA7,PSMB2,PSMB3,PSMB6,PSMB7,PSMC3,PSMC4,PSMC5,PSMD3,PSMD7,PSMD8,PSMD11
GO: Biological Process	GO:0015931	nucleobase-containing compound transport	0.003506	1	0.04438	0.4021	15	248	RPS15,SEC13,SLC25A4,SLC25A5,SLC25A6,NXT1,CETN2,SLC35A2,THOC6,EIF6,SEM1,SLC35C2,NUTF2,DDX39A,SLC35B1
GO: Biological Process	GO:0006361	transcription initiation from RNA polymerase I promoter	0.00355	1	0.04481	0.406	5	38	POLR1H,POLR2F,POLR2H,POLR2L,PIH1D1
GO: Biological Process	GO:0071356	cellular response to tumor necrosis factor	0.003688	1	0.04644	0.4208	17	299	RPS3,RACK1,INPP5K,TXNDC17,CFL1,PSMA7,PSMB2,PSMB3,PSMB6,PSMB7,PSMC3,PSMC4,PSMC5,PSMD3,PSMD7,PSMD8,PSMD11
GO: Biological Process	GO:0043629	ncRNA polyadenylation	0.003703	1	0.0465	0.4213	3	12	EXOSC7,EXOSC4,EXOSC5
GO: Biological Process	GO:0046031	ADP metabolic process	0.003765	1	0.04711	0.4268	10	134	ALDOC,SEC13,GAPDH,SLC2A6,TPI1,PFKM,PGAM4,PKM,EIF6,ENO1
GO: Biological Process	GO:0010592	positive regulation of lamellipodium assembly	0.00378	1	0.04711	0.4268	4	24	BRK1,CFL1,TWF2,ARPC2
GO: Biological Process	GO:0006297	nucleotide-excision repair, DNA gap filling	0.00378	1	0.04711	0.4268	4	24	UBA52,UBB,UBC,RFC2
GO: Biological Process	GO:0033683	nucleotide-excision repair, DNA incision	0.003982	1	0.04949	0.4485	5	39	NTHL1,UBA52,UBB,UBC,RFC2
GO: Cellular Component	GO:0044391	ribosomal subunit	2.327e-60	1.769e-57	1.769e-57	1.276e-56	73	215	RPL26,RPL27,RPL30,RPL27A,RPL28,RPL29,RPL31,RPL32,RPL34,RPL36AL,RPL37,RPL37A,RPL38,RPLP0,RPLP1,RPLP2,MRPS12,RPS3,RPS4Y1,RPS5,RPS6,RPS8,MRPL51,RPS9,RPS11,RPS12,RPS14,MRPL27,RPS15,RPS16,RPS18,RPS21,RPS24,RPS28,RPS29,FAU,RACK1,ZNF622,MRPL28,EIF3C,EIF3G,EIF3H,EIF3I,RPL10A,EIF3K,MPV17L2,RPL14,RPL35,RPL13A,UBA52,RPL36,MRPL55,MRPL14,MRPS26,C12orf65,MRPS11,MRPL41,MRPL40,RPLP0P6,EIF3CL,MRPL20,MRPL54,MRPL52…
GO: Cellular Component	GO:0005840	ribosome	2.754e-51	2.093e-48	1.046e-48	7.545e-48	75	298	RPL26,RPL27,RPL30,RPL27A,RPL28,RPL29,RPL31,RPL32,RPL34,RPL36AL,RPL37,RPL37A,RPL38,RPLP0,RPLP1,RPLP2,MRPS12,RPS3,RPS4Y1,RPS5,RPS6,RPS8,MRPL51,RPS9,RPS11,RPS12,RPS14,MRPL27,RPS15,RPS16,RPS18,RPS21,RPS24,RPS28,RPS29,FAU,RACK1,ZNF622,APEX1,MRPL28,GADD45GIP1,EIF3C,EIF3G,EIF3H,EIF3I,RPL10A,EIF3K,MPV17L2,RPL14,RPL35,RPL13A,UBA52,RPL36,MRPL55,MRPL14,MRPS26,C12orf65,MRPS11,MRPL41,MRPL40,RPLP0P6,EIF3CL,MRP…
GO: Cellular Component	GO:0022626	cytosolic ribosome	1.931e-49	1.468e-46	4.892e-47	3.528e-46	54	134	RPL26,RPL27,RPL30,RPL27A,RPL28,RPL29,RPL31,RPL32,RPL34,RPL36AL,RPL37,RPL37A,RPL38,RPLP0,RPLP1,RPLP2,RPS3,RPS4Y1,RPS5,RPS6,RPS8,RPS9,RPS11,RPS12,RPS14,RPS15,RPS16,RPS18,RPS21,RPS24,RPS28,RPS29,FAU,RACK1,ZNF622,EIF3C,EIF3G,EIF3H,EIF3I,RPL10A,EIF3K,RPL14,RPL35,RPL13A,UBA52,RPL36,RPLP0P6,EIF3CL,RPL26L1,RPL7A,RPL8,RPL13,RPL18,RPL19
GO: Cellular Component	GO:0015934	large ribosomal subunit	4.688e-40	3.563e-37	8.908e-38	6.423e-37	46	125	RPL26,RPL27,RPL30,RPL27A,RPL28,RPL29,RPL31,RPL32,RPL34,RPL36AL,RPL37,RPL37A,RPL38,RPLP0,RPLP1,RPLP2,MRPL51,RPS12,MRPL27,ZNF622,MRPL28,RPL10A,MPV17L2,RPL14,RPL35,RPL13A,UBA52,RPL36,MRPL55,MRPL14,C12orf65,MRPL41,MRPL40,RPLP0P6,MRPL20,MRPL54,MRPL52,MRPL2,MRPS18A,MRPL4,RPL26L1,RPL7A,RPL8,RPL13,RPL18,RPL19
GO: Cellular Component	GO:0098798	mitochondrial protein complex	9.788e-40	7.439e-37	1.488e-37	1.073e-36	62	271	MRPS12,MRPL51,MRPL27,UQCRHL,ATP5F1EP2,FOXRED1,COA3,SLC25A6,MRPL28,CHCHD6,UQCC3,TIMM50,ATP5F1A,ATP5F1B,ATP5MC2,ATP5ME,ATP5PO,SPG7,NDUFA8,NDUFB2,BCS1L,NDUFB7,NDUFB8,NDUFB9,NDUFB10,NDUFS3,NDUFV1,NDUFS5,NDUFS8,NDUFV3,PMPCA,UQCRFS1P1,MPV17L2,HSD17B10,SAMM50,UQCRC1,UQCRH,TIMM22,NDUFB11,TOMM7,COX4I1,MRPL55,ATP5MF,MRPL14,MRPS26,C12orf65,MRPS11,MRPL41,MRPL40,ROMO1,NDUFS7,SMDT1,MRPL20,MRPL54,DMAC2,MRPL52,M…
GO: Cellular Component	GO:0005739	mitochondrion	1.369e-36	1.04e-33	1.734e-34	1.25e-33	151	1866	CLPP,RPL34,MRPS12,RPS3,MRPL51,RPS14,MRPL27,MDH2,ECSIT,FANCG,RACK1,PEMT,ALAS1,ALDOC,UQCRHL,ATP5F1EP2,STOML2,MPG,FOXRED1,COA3,SLC25A4,SLC25A5,SLC25A6,ALKBH7,CHCHD5,ADCK5,CARD19,APEX1,SIVA1,MRPL28,CCT7,CHCHD6,VPS25,GADD45GIP1,TRUB2,MSRB2,SIRT2,UQCC3,SLC25A39,TIMM50,DYNLL1,ATP5F1A,SOD1,ATP5F1B,ATP5MC2,ATP5ME,ATP5PO,SPG7,GAPDH,BCAT2,NDUFA8,NDUFB2,BCS1L,NDUFB7,NDUFB8,NDUFB9,NDUFB10,NDUFS3,NDUFV1,NDUFS5…
GO: Cellular Component	GO:0005740	mitochondrial envelope	4.719e-36	3.586e-33	5.123e-34	3.694e-33	96	800	MRPS12,RPS3,MRPL51,MRPL27,MDH2,ECSIT,PEMT,UQCRHL,ATP5F1EP2,STOML2,FOXRED1,COA3,SLC25A4,SLC25A5,SLC25A6,CHCHD5,CARD19,MRPL28,CHCHD6,UQCC3,SLC25A39,TIMM50,ATP5F1A,SOD1,ATP5F1B,ATP5MC2,ATP5ME,ATP5PO,SPG7,NDUFA8,NDUFB2,BCS1L,NDUFB7,NDUFB8,NDUFB9,NDUFB10,NDUFS3,NDUFV1,NDUFS5,NDUFS8,NDUFV3,TMEM11,PMPCA,NME1,UQCRFS1P1,MPV17L2,HTRA2,GPX4,GCAT,PEBP1,HSD17B10,CFL1,PARK7,PHB2,TUFM,PHB,UBA52,UBB,UBC,CPT1C,SA…
GO: Cellular Component	GO:0005743	mitochondrial inner membrane	4.143e-35	3.149e-32	3.936e-33	2.838e-32	78	535	MRPS12,RPS3,MRPL51,MRPL27,MDH2,ECSIT,UQCRHL,ATP5F1EP2,STOML2,FOXRED1,COA3,SLC25A4,SLC25A5,SLC25A6,MRPL28,CHCHD6,UQCC3,SLC25A39,TIMM50,ATP5F1A,ATP5F1B,ATP5MC2,ATP5ME,ATP5PO,SPG7,NDUFA8,NDUFB2,BCS1L,NDUFB7,NDUFB8,NDUFB9,NDUFB10,NDUFS3,NDUFV1,NDUFS5,NDUFS8,NDUFV3,TMEM11,PMPCA,UQCRFS1P1,MPV17L2,GPX4,GCAT,HSD17B10,PHB2,TUFM,PHB,SAMM50,UQCRC1,UQCRH,TIMM22,NDUFB11,COX4I1,MRPL55,NDUFAF3,COX6B1,ATP5MF,MRP…
GO: Cellular Component	GO:0031966	mitochondrial membrane	5.243e-35	3.985e-32	4.427e-33	3.193e-32	92	756	MRPS12,RPS3,MRPL51,MRPL27,MDH2,ECSIT,PEMT,UQCRHL,ATP5F1EP2,STOML2,FOXRED1,COA3,SLC25A4,SLC25A5,SLC25A6,CARD19,MRPL28,CHCHD6,UQCC3,SLC25A39,TIMM50,ATP5F1A,ATP5F1B,ATP5MC2,ATP5ME,ATP5PO,SPG7,NDUFA8,NDUFB2,BCS1L,NDUFB7,NDUFB8,NDUFB9,NDUFB10,NDUFS3,NDUFV1,NDUFS5,NDUFS8,NDUFV3,TMEM11,PMPCA,NME1,UQCRFS1P1,MPV17L2,HTRA2,GPX4,GCAT,PEBP1,HSD17B10,CFL1,PHB2,TUFM,PHB,UBA52,UBB,UBC,CPT1C,SAMM50,UQCRC1,UQCRH,…
GO: Cellular Component	GO:0019866	organelle inner membrane	2.088e-33	1.587e-30	1.587e-31	1.144e-30	80	596	MRPS12,RPS3,MRPL51,MRPL27,MDH2,ECSIT,UQCRHL,ATP5F1EP2,STOML2,FOXRED1,COA3,SLC25A4,SLC25A5,SLC25A6,MRPL28,CHCHD6,UQCC3,SLC25A39,TIMM50,ATP5F1A,ATP5F1B,ATP5MC2,ATP5ME,ATP5PO,SPG7,NDUFA8,NDUFB2,BCS1L,NDUFB7,NDUFB8,NDUFB9,NDUFB10,NDUFS3,NDUFV1,NDUFS5,NDUFS8,NDUFV3,TMEM11,PMPCA,UQCRFS1P1,MPV17L2,GPX4,GCAT,HSD17B10,PHB2,TUFM,PHB,SAMM50,UQCRC1,UQCRH,TIMM22,NDUFB11,COX4I1,MRPL55,NDUFAF3,COX6B1,ATP5MF,MRP…
GO: Cellular Component	GO:0022625	cytosolic large ribosomal subunit	1.276e-31	9.7e-29	8.818e-30	6.359e-29	31	65	RPL26,RPL27,RPL30,RPL27A,RPL28,RPL29,RPL31,RPL32,RPL34,RPL36AL,RPL37,RPL37A,RPL38,RPLP0,RPLP1,RPLP2,RPS12,ZNF622,RPL10A,RPL14,RPL35,RPL13A,UBA52,RPL36,RPLP0P6,RPL26L1,RPL7A,RPL8,RPL13,RPL18,RPL19
GO: Cellular Component	GO:0031967	organelle envelope	2.673e-28	2.031e-25	1.671e-26	1.205e-25	110	1279	MRPS12,RPS3,MRPL51,MRPL27,MDH2,ECSIT,PEMT,UQCRHL,ATP5F1EP2,STOML2,SEC13,FOXRED1,COA3,SLC25A4,SLC25A5,SLC25A6,CHCHD5,CARD19,APEH,MRPL28,CHCHD6,UQCC3,SLC25A39,NXT1,EBP,TIMM50,ATP5F1A,SOD1,ATP5F1B,ATP5MC2,ATP5ME,ATP5PO,SPG7,GAPDH,NDUFA8,NDUFB2,BCS1L,NDUFB7,NDUFB8,NDUFB9,CHMP2A,NDUFB10,BANF1,NDUFS3,NDUFV1,NDUFS5,NDUFS8,NDUFV3,TMEM11,PMPCA,NME1,UQCRFS1P1,MPV17L2,MLX,HTRA2,GPX4,GCAT,PEBP1,HSD17B10,CDK4…
GO: Cellular Component	GO:0031975	envelope	2.858e-28	2.172e-25	1.671e-26	1.205e-25	110	1280	MRPS12,RPS3,MRPL51,MRPL27,MDH2,ECSIT,PEMT,UQCRHL,ATP5F1EP2,STOML2,SEC13,FOXRED1,COA3,SLC25A4,SLC25A5,SLC25A6,CHCHD5,CARD19,APEH,MRPL28,CHCHD6,UQCC3,SLC25A39,NXT1,EBP,TIMM50,ATP5F1A,SOD1,ATP5F1B,ATP5MC2,ATP5ME,ATP5PO,SPG7,GAPDH,NDUFA8,NDUFB2,BCS1L,NDUFB7,NDUFB8,NDUFB9,CHMP2A,NDUFB10,BANF1,NDUFS3,NDUFV1,NDUFS5,NDUFS8,NDUFV3,TMEM11,PMPCA,NME1,UQCRFS1P1,MPV17L2,MLX,HTRA2,GPX4,GCAT,PEBP1,HSD17B10,CDK4…
GO: Cellular Component	GO:0098800	inner mitochondrial membrane protein complex	4.177e-27	3.175e-24	2.268e-25	1.635e-24	37	135	UQCRHL,ATP5F1EP2,FOXRED1,COA3,SLC25A6,CHCHD6,UQCC3,TIMM50,ATP5F1A,ATP5F1B,ATP5MC2,ATP5ME,ATP5PO,SPG7,NDUFA8,NDUFB2,BCS1L,NDUFB7,NDUFB8,NDUFB9,NDUFB10,NDUFS3,NDUFV1,NDUFS5,NDUFS8,NDUFV3,UQCRFS1P1,UQCRC1,UQCRH,TIMM22,NDUFB11,COX4I1,ATP5MF,ROMO1,NDUFS7,SMDT1,DMAC2
GO: Cellular Component	GO:0015935	small ribosomal subunit	3.214e-24	2.442e-21	1.628e-22	1.174e-21	30	95	MRPS12,RPS3,RPS4Y1,RPS5,RPS6,RPS8,RPS9,RPS11,RPS12,RPS14,RPS15,RPS16,RPS18,RPS21,RPS24,RPS28,RPS29,FAU,RACK1,EIF3C,EIF3G,EIF3H,EIF3I,EIF3K,UBA52,MRPS26,MRPS11,EIF3CL,MRPS18A,MRPS2
GO: Cellular Component	GO:0022627	cytosolic small ribosomal subunit	4.75e-23	3.61e-20	2.256e-21	1.627e-20	25	64	RPS3,RPS4Y1,RPS5,RPS6,RPS8,RPS9,RPS11,RPS12,RPS14,RPS15,RPS16,RPS18,RPS21,RPS24,RPS28,RPS29,FAU,RACK1,EIF3C,EIF3G,EIF3H,EIF3I,EIF3K,UBA52,EIF3CL
GO: Cellular Component	GO:1990904	ribonucleoprotein complex	7.089e-22	5.387e-19	3.169e-20	2.285e-19	109	1508	POP7,RPL26,RPL27,RPL30,RPL27A,RPL28,RPL29,RPL31,RPL32,RPL34,RPL36AL,RPL37,RPL37A,RPL38,RPLP0,RPLP1,RPLP2,MRPS12,RPS3,RPS4Y1,RPS5,RPS6,RPS8,MRPL51,RPS9,ACTB,RPS11,RPS12,RPS14,MRPL27,RPS15,RPS16,RPS18,RPS21,RPS24,RPS28,RPS29,MCRIP1,FAU,RACK1,MCRS1,NOP10,NOP56,WDR83,ZNF622,APEX1,MRPL28,CCDC12,NAA38,NHP2,GADD45GIP1,RUVBL1,RBMX2,EIF3C,EIF3G,LSM2,EIF3H,EIF3I,SNRPD2,LSM7,GAPDH,RUVBL2,RPL10A,ZMAT5,IMP4,E…
GO: Cellular Component	GO:0005759	mitochondrial matrix	6.68e-20	5.077e-17	2.82e-18	2.034e-17	55	478	CLPP,MRPS12,RPS3,MRPL51,MRPL27,MDH2,ALAS1,MPG,SLC25A5,ALKBH7,MRPL28,GADD45GIP1,TRUB2,ATP5F1A,SOD1,ATP5F1B,BCAT2,NDUFB8,NDUFS3,NDUFS8,PMPCA,FASTK,MPV17L2,GPX1,PRDX1,HSD17B10,HAGH,TBRG4,PARK7,TUFM,PRDX5,TXN2,MRPL55,IDH3B,IDH3G,MRPL14,MRPS26,C12orf65,MRPS11,MRPL41,MRPL40,NDUFS7,SMDT1,IVD,SDHAF2,ERAL1,QARS1,MRPL20,MRPL54,MRPL52,ECHS1,MRPL2,MRPS18A,MRPL4,MRPS2
GO: Cellular Component	GO:0098803	respiratory chain complex	2.374e-18	1.805e-15	9.497e-17	6.849e-16	24	85	UQCRHL,FOXRED1,COA3,UQCC3,NDUFA8,NDUFB2,BCS1L,NDUFB7,NDUFB8,NDUFB9,NDUFB10,NDUFS3,NDUFV1,NDUFS5,NDUFS8,NDUFV3,UQCRFS1P1,UQCRC1,UQCRH,NDUFB11,COX4I1,COX6B1,NDUFS7,DMAC2
GO: Cellular Component	GO:1902494	catalytic complex	2.359e-17	1.793e-14	8.966e-16	6.465e-15	101	1536	POP7,RPN1,RPN2,MAEA,ACTB,NAA10,POLR1H,FARSA,PEF1,MCRS1,NOP10,ACTL6B,MAD2L2,ZNHIT1,UQCRHL,FOXRED1,WDR83,ANAPC11,NAA38,NHP2,RUVBL1,UQCC3,ORMDL2,DYNLL1,LSM2,EXOSC7,SNRPD2,LSM7,SPG7,AUP1,OST4,NDUFA8,NDUFB2,RUVBL2,BCS1L,NDUFB7,NDUFB8,NDUFB9,NDUFB10,DPM2,NDUFS3,NDUFV1,NDUFS5,NDUFS8,NDUFV3,MMS19,GNG3,TMEM258,TARBP2,NSMCE1,UQCRFS1P1,ELOB,PCGF1,HTRA2,ADRM1,HSD17B10,CDK4,UBE2L6,PFKM,DDA1,PGAM4,PKM,TSEN34,P…
GO: Cellular Component	GO:0005746	mitochondrial respirasome	8.105e-17	6.16e-14	2.933e-15	2.115e-14	23	88	UQCRHL,FOXRED1,COA3,UQCC3,NDUFA8,NDUFB2,BCS1L,NDUFB7,NDUFB8,NDUFB9,NDUFB10,NDUFS3,NDUFV1,NDUFS5,NDUFS8,NDUFV3,UQCRFS1P1,UQCRC1,UQCRH,NDUFB11,COX4I1,NDUFS7,DMAC2
GO: Cellular Component	GO:0070469	respirasome	1.455e-16	1.106e-13	5.026e-15	3.625e-14	24	100	UQCRHL,FOXRED1,COA3,UQCC3,NDUFA8,NDUFB2,BCS1L,NDUFB7,NDUFB8,NDUFB9,NDUFB10,NDUFS3,NDUFV1,NDUFS5,NDUFS8,NDUFV3,UQCRFS1P1,UQCRC1,UQCRH,NDUFB11,COX4I1,COX6B1,NDUFS7,DMAC2
GO: Cellular Component	GO:0042788	polysomal ribosome	4.498e-15	3.419e-12	1.486e-13	1.072e-12	15	35	RPL30,RPL29,RPL31,RPL32,RPL38,RPS21,RPS28,RPS29,EIF3H,RPL10A,RPL36,RPL7A,RPL8,RPL18,RPL19
GO: Cellular Component	GO:0005844	polysome	4.635e-14	3.523e-11	1.468e-12	1.059e-11	20	83	RPL30,RPL29,RPL31,RPL32,RPL38,RPS3,RPS4Y1,RPS6,RPS21,RPS28,RPS29,MCRS1,NAA38,EIF3H,RPL10A,RPL36,RPL7A,RPL8,RPL18,RPL19
GO: Cellular Component	GO:0098796	membrane protein complex	3.62e-13	2.752e-10	1.101e-11	7.937e-11	83	1324	RPN1,RPN2,NRN1,PEF1,UQCRHL,ATP5F1EP2,STOML2,SEC13,FLOT2,FOXRED1,LAMTOR2,COA3,SLC25A6,CHCHD6,VPS25,UQCC3,ORMDL2,TIMM50,ATP5F1A,ATP5F1B,ATP5MC2,ATP5ME,VPS11,ATP6V0B,ATP6AP1,ATP5PO,SPG7,AUP1,OST4,SSR4,NDUFA8,NDUFB2,BCS1L,NDUFB7,NDUFB8,NDUFB9,CHMP2A,NDUFB10,DPM2,NDUFS3,NDUFV1,NDUFS5,NDUFS8,NDUFV3,LIN7B,AP1M1,GNG3,TMEM258,UQCRFS1P1,HTRA2,TMED3,ATP6V0D1,SNF8,COPE,AP2M1,AP2S1,CPT1C,UFD1,CLTA,TOLLIP,SAMM…
GO: Cellular Component	GO:0043209	myelin sheath	6.967e-13	5.295e-10	2.036e-11	1.468e-10	29	213	ACTB,ACTG1,MDH2,AKR1B1,SLC25A4,SLC25A5,SIRT2,CCT5,ATP5F1A,SOD1,ATP5F1B,ATP5PO,GAPDH,NDUFS3,PRDX2,PEBP1,TKT,PRDX1,TUFM,PHB,UBA52,UBB,UBC,UCHL1,PKM,UQCRC1,HSP90AA2P,PRKCZ,ENO1
GO: Cellular Component	GO:0005747	mitochondrial respiratory chain complex I	2.149e-12	1.633e-09	5.633e-11	4.062e-10	15	50	FOXRED1,NDUFA8,NDUFB2,NDUFB7,NDUFB8,NDUFB9,NDUFB10,NDUFS3,NDUFV1,NDUFS5,NDUFS8,NDUFV3,NDUFB11,NDUFS7,DMAC2
GO: Cellular Component	GO:0030964	NADH dehydrogenase complex	2.149e-12	1.633e-09	5.633e-11	4.062e-10	15	50	FOXRED1,NDUFA8,NDUFB2,NDUFB7,NDUFB8,NDUFB9,NDUFB10,NDUFS3,NDUFV1,NDUFS5,NDUFS8,NDUFV3,NDUFB11,NDUFS7,DMAC2
GO: Cellular Component	GO:0045271	respiratory chain complex I	2.149e-12	1.633e-09	5.633e-11	4.062e-10	15	50	FOXRED1,NDUFA8,NDUFB2,NDUFB7,NDUFB8,NDUFB9,NDUFB10,NDUFS3,NDUFV1,NDUFS5,NDUFS8,NDUFV3,NDUFB11,NDUFS7,DMAC2
GO: Cellular Component	GO:0005761	mitochondrial ribosome	3.169e-12	2.409e-09	7.77e-11	5.603e-10	19	91	MRPS12,MRPL51,MRPL27,MRPL28,MPV17L2,MRPL55,MRPL14,MRPS26,C12orf65,MRPS11,MRPL41,MRPL40,MRPL20,MRPL54,MRPL52,MRPL2,MRPS18A,MRPL4,MRPS2
GO: Cellular Component	GO:0000313	organellar ribosome	3.169e-12	2.409e-09	7.77e-11	5.603e-10	19	91	MRPS12,MRPL51,MRPL27,MRPL28,MPV17L2,MRPL55,MRPL14,MRPS26,C12orf65,MRPS11,MRPL41,MRPL40,MRPL20,MRPL54,MRPL52,MRPL2,MRPS18A,MRPL4,MRPS2
GO: Cellular Component	GO:1990204	oxidoreductase complex	4.241e-12	3.223e-09	1.007e-10	7.264e-10	21	116	UQCRHL,FOXRED1,UQCC3,NDUFA8,NDUFB2,BCS1L,NDUFB7,NDUFB8,NDUFB9,NDUFB10,NDUFS3,NDUFV1,NDUFS5,NDUFS8,NDUFV3,UQCRFS1P1,UQCRC1,UQCRH,NDUFB11,NDUFS7,DMAC2
GO: Cellular Component	GO:1905369	endopeptidase complex	2.402e-11	1.825e-08	5.531e-10	3.989e-09	16	68	HTRA2,ADRM1,ZFAND2B,PSMA7,PSMB2,PSMB3,PSMB6,PSMB7,PSMC3,PSMC4,PSMC5,PSMD3,PSMD7,PSMD8,PSMD11,SEM1
GO: Cellular Component	GO:0005762	mitochondrial large ribosomal subunit	3.048e-11	2.317e-08	6.619e-10	4.773e-09	15	59	MRPL51,MRPL27,MRPL28,MPV17L2,MRPL55,MRPL14,C12orf65,MRPL41,MRPL40,MRPL20,MRPL54,MRPL52,MRPL2,MRPS18A,MRPL4
GO: Cellular Component	GO:0000315	organellar large ribosomal subunit	3.048e-11	2.317e-08	6.619e-10	4.773e-09	15	59	MRPL51,MRPL27,MRPL28,MPV17L2,MRPL55,MRPL14,C12orf65,MRPL41,MRPL40,MRPL20,MRPL54,MRPL52,MRPL2,MRPS18A,MRPL4
GO: Cellular Component	GO:0000502	proteasome complex	2.167e-10	1.647e-07	4.575e-09	3.299e-08	15	67	ADRM1,ZFAND2B,PSMA7,PSMB2,PSMB3,PSMB6,PSMB7,PSMC3,PSMC4,PSMC5,PSMD3,PSMD7,PSMD8,PSMD11,SEM1
GO: Cellular Component	GO:1905368	peptidase complex	4.043e-10	3.072e-07	8.304e-09	5.988e-08	17	93	SPG7,HTRA2,ADRM1,ZFAND2B,PSMA7,PSMB2,PSMB3,PSMB6,PSMB7,PSMC3,PSMC4,PSMC5,PSMD3,PSMD7,PSMD8,PSMD11,SEM1
GO: Cellular Component	GO:0005838	proteasome regulatory particle	2.489e-09	1.892e-06	4.978e-08	3.59e-07	9	22	ADRM1,PSMC3,PSMC4,PSMC5,PSMD3,PSMD7,PSMD8,PSMD11,SEM1
GO: Cellular Component	GO:0022624	proteasome accessory complex	9.512e-09	7.229e-06	1.854e-07	1.337e-06	9	25	ADRM1,PSMC3,PSMC4,PSMC5,PSMD3,PSMD7,PSMD8,PSMD11,SEM1
GO: Cellular Component	GO:0070069	cytochrome complex	1.968e-07	0.0001496	3.739e-06	2.696e-05	9	34	UQCRHL,COA3,UQCC3,BCS1L,UQCRFS1P1,UQCRC1,UQCRH,COX4I1,COX6B1
GO: Cellular Component	GO:0008250	oligosaccharyltransferase complex	5.348e-07	0.0004065	9.914e-06	7.149e-05	6	13	RPN1,RPN2,OST4,TMEM258,DAD1,DDOST
GO: Cellular Component	GO:0008541	proteasome regulatory particle, lid subcomplex	7.199e-07	0.0005471	1.303e-05	9.394e-05	5	8	ADRM1,PSMD3,PSMD8,PSMD11,SEM1
GO: Cellular Component	GO:0005925	focal adhesion	8.339e-07	0.0006338	1.474e-05	0.0001063	30	411	RPL27,RPL30,RPL31,RPL37A,RPL38,RPLP0,RPLP1,RPLP2,RPS3,RPS5,RPS8,RPS9,ACTB,RPS11,RPS14,RPS15,ACTG1,RPS16,RPS18,RPS29,FLOT2,RPL10A,BSG,RPL13A,CFL1,ARPC2,RPL7A,RPL8,RPL18,RPL19
GO: Cellular Component	GO:0016469	proton-transporting two-sector ATPase complex	8.568e-07	0.0006512	1.48e-05	0.0001067	10	51	ATP5F1EP2,ATP5F1A,ATP5F1B,ATP5MC2,ATP5ME,ATP6V0B,ATP6AP1,ATP5PO,ATP6V0D1,ATP5MF
GO: Cellular Component	GO:0005750	mitochondrial respiratory chain complex III	9.147e-07	0.0006952	1.511e-05	0.000109	6	14	UQCRHL,UQCC3,BCS1L,UQCRFS1P1,UQCRC1,UQCRH
GO: Cellular Component	GO:0045275	respiratory chain complex III	9.147e-07	0.0006952	1.511e-05	0.000109	6	14	UQCRHL,UQCC3,BCS1L,UQCRFS1P1,UQCRC1,UQCRH
GO: Cellular Component	GO:0005753	mitochondrial proton-transporting ATP synthase complex	1.168e-06	0.0008876	1.889e-05	0.0001362	7	22	ATP5F1EP2,ATP5F1A,ATP5F1B,ATP5MC2,ATP5ME,ATP5PO,ATP5MF
GO: Cellular Component	GO:0030055	cell-substrate junction	1.371e-06	0.001042	2.171e-05	0.0001566	30	421	RPL27,RPL30,RPL31,RPL37A,RPL38,RPLP0,RPLP1,RPLP2,RPS3,RPS5,RPS8,RPS9,ACTB,RPS11,RPS14,RPS15,ACTG1,RPS16,RPS18,RPS29,FLOT2,RPL10A,BSG,RPL13A,CFL1,ARPC2,RPL7A,RPL8,RPL18,RPL19
GO: Cellular Component	GO:0033290	eukaryotic 48S preinitiation complex	1.49e-06	0.001132	2.311e-05	0.0001666	6	15	EIF3C,EIF3G,EIF3H,EIF3I,EIF3K,EIF3CL
GO: Cellular Component	GO:0045259	proton-transporting ATP synthase complex	1.64e-06	0.001247	2.493e-05	0.0001798	7	23	ATP5F1EP2,ATP5F1A,ATP5F1B,ATP5MC2,ATP5ME,ATP5PO,ATP5MF
GO: Cellular Component	GO:0005852	eukaryotic translation initiation factor 3 complex	2.33e-06	0.001771	3.472e-05	0.0002504	6	16	EIF3C,EIF3G,EIF3H,EIF3I,EIF3K,EIF3CL
GO: Cellular Component	GO:0005758	mitochondrial intermembrane space	2.772e-06	0.002107	4.052e-05	0.0002922	12	85	STOML2,CHCHD5,SOD1,NDUFA8,NDUFB7,NDUFS5,HTRA2,PARK7,COX6B1,CIAPIN1,TIMM13,TIMM8B
GO: Cellular Component	GO:0016282	eukaryotic 43S preinitiation complex	3.519e-06	0.002674	5.046e-05	0.0003639	6	17	EIF3C,EIF3G,EIF3H,EIF3I,EIF3K,EIF3CL
GO: Cellular Component	GO:0070993	translation preinitiation complex	5.159e-06	0.00392	7.221e-05	0.0005208	6	18	EIF3C,EIF3G,EIF3H,EIF3I,EIF3K,EIF3CL
GO: Cellular Component	GO:0042175	nuclear outer membrane-endoplasmic reticulum membrane network	5.226e-06	0.003972	7.221e-05	0.0005208	56	1116	RPL27,RPN1,RPN2,RPS28,RPS29,PEMT,TMEM147,SDF2,CREB3,SEC13,CARD19,ZDHHC16,YIF1B,ERGIC3,ORMDL2,NSG1,EBP,ATP6AP1,AUP1,USE1,JAGN1,OST4,SSR4,DPM2,YIF1A,LMAN2,TMEM258,HTRA2,SERP2,TMED3,ERG28,TKT,COPE,HMOX2,UBA52,UBB,RAB33A,UBC,CPT1C,UCHL1,UFD1,PEX16,ELOVL1,POR,PORCN,CYBC1,ZFAND2B,DAD1,DDOST,EMC9,DOLPP1,UBXN1,ZDHHC4,BCAP31,NUTF2,SLC35B1
GO: Cellular Component	GO:0005789	endoplasmic reticulum membrane	5.877e-06	0.004466	7.976e-05	0.0005752	55	1093	RPL27,RPN1,RPN2,RPS28,RPS29,PEMT,TMEM147,SDF2,CREB3,SEC13,CARD19,ZDHHC16,YIF1B,ERGIC3,ORMDL2,NSG1,EBP,ATP6AP1,AUP1,USE1,JAGN1,OST4,SSR4,DPM2,YIF1A,LMAN2,TMEM258,HTRA2,SERP2,TMED3,ERG28,TKT,COPE,HMOX2,UBA52,UBB,RAB33A,UBC,CPT1C,UCHL1,UFD1,PEX16,ELOVL1,POR,PORCN,CYBC1,ZFAND2B,DAD1,DDOST,EMC9,DOLPP1,UBXN1,ZDHHC4,BCAP31,SLC35B1
GO: Cellular Component	GO:0031970	organelle envelope lumen	1.122e-05	0.008526	0.0001496	0.001079	12	97	STOML2,CHCHD5,SOD1,NDUFA8,NDUFB7,NDUFS5,HTRA2,PARK7,COX6B1,CIAPIN1,TIMM13,TIMM8B
GO: Cellular Component	GO:0005912	adherens junction	2.332e-05	0.01772	0.0003055	0.002203	33	560	RPL27,RPL30,RPL31,RPL37A,RPL38,RPLP0,RPLP1,RPLP2,RPS3,RPS5,RPS8,RPS9,ACTB,RPS11,RPS14,RPS15,ACTG1,RPS16,RPS18,RPS29,FLOT2,RPL10A,LIN7B,BSG,RPL13A,CFL1,PARK7,PPP1CA,ARPC2,RPL7A,RPL8,RPL18,RPL19
GO: Cellular Component	GO:1990234	transferase complex	2.516e-05	0.01912	0.0003241	0.002337	43	821	RPN1,RPN2,MAEA,ACTB,NAA10,POLR1H,PEF1,MCRS1,ACTL6B,MAD2L2,ANAPC11,NAA38,RUVBL1,ORMDL2,SNRPD2,AUP1,OST4,RUVBL2,DPM2,MMS19,TMEM258,NSMCE1,ELOB,PCGF1,CDK4,UBE2L6,PFKM,DDA1,PKM,PRMT1,POLR2F,POLR2H,POLR2I,POLR2L,POLE4,PAF1,FBXO44,FBXL12,DAD1,PSMC5,DDOST,RABGGTA,DMAC2
GO: Cellular Component	GO:0033177	proton-transporting two-sector ATPase complex, proton-transporting domain	3.26e-05	0.02478	0.0004129	0.002978	6	24	ATP5MC2,ATP5ME,ATP6V0B,ATP5PO,ATP6V0D1,ATP5MF
GO: Cellular Component	GO:0070161	anchoring junction	3.932e-05	0.02988	0.0004898	0.003532	33	575	RPL27,RPL30,RPL31,RPL37A,RPL38,RPLP0,RPLP1,RPLP2,RPS3,RPS5,RPS8,RPS9,ACTB,RPS11,RPS14,RPS15,ACTG1,RPS16,RPS18,RPS29,FLOT2,RPL10A,LIN7B,BSG,RPL13A,CFL1,PARK7,PPP1CA,ARPC2,RPL7A,RPL8,RPL18,RPL19
GO: Cellular Component	GO:0071005	U2-type precatalytic spliceosome	5.127e-05	0.03896	0.0006284	0.004532	8	50	RBMX2,LSM2,SNRPD2,LSM7,SNU13,PRPF4,SF3B5,RNF113A
GO: Cellular Component	GO:0071011	precatalytic spliceosome	5.939e-05	0.04514	0.0007164	0.005166	8	51	RBMX2,LSM2,SNRPD2,LSM7,SNU13,PRPF4,SF3B5,RNF113A
GO: Cellular Component	GO:0031301	integral component of organelle membrane	0.0001057	0.08033	0.001255	0.009051	24	380	CREB3,COA3,SLC25A4,CHCHD6,YIF1B,ERGIC3,UQCC3,SPG7,AUP1,DPM2,TMEM11,YIF1A,CPT1C,SLC35A2,PEX16,ELOVL1,PORCN,SMDT1,EMC9,FIS1,DOLPP1,RHOT2,BCAP31,SLC35B1
GO: Cellular Component	GO:0019774	proteasome core complex, beta-subunit complex	0.0001463	0.1112	0.001711	0.01234	4	11	PSMB2,PSMB3,PSMB6,PSMB7
GO: Cellular Component	GO:0005839	proteasome core complex	0.0001525	0.1159	0.001756	0.01266	5	20	PSMA7,PSMB2,PSMB3,PSMB6,PSMB7
GO: Cellular Component	GO:0048475	coated membrane	0.0001698	0.1291	0.001898	0.01369	11	109	PEF1,SEC13,VPS11,CHMP2A,AP1M1,TMED3,COPE,AP2M1,AP2S1,CLTA,PICK1
GO: Cellular Component	GO:0030117	membrane coat	0.0001698	0.1291	0.001898	0.01369	11	109	PEF1,SEC13,VPS11,CHMP2A,AP1M1,TMED3,COPE,AP2M1,AP2S1,CLTA,PICK1
GO: Cellular Component	GO:0097255	R2TP complex	0.0001852	0.1408	0.002011	0.0145	3	5	RUVBL1,RUVBL2,PIH1D1
GO: Cellular Component	GO:0071817	MMXD complex	0.0001852	0.1408	0.002011	0.0145	3	5	SLC25A5,CIAO2B,MMS19
GO: Cellular Component	GO:0032592	integral component of mitochondrial membrane	0.0001965	0.1493	0.002103	0.01517	9	76	COA3,SLC25A4,CHCHD6,UQCC3,SPG7,TMEM11,SMDT1,FIS1,RHOT2
GO: Cellular Component	GO:0005741	mitochondrial outer membrane	0.0001997	0.1518	0.002108	0.0152	15	190	SLC25A4,ATP5MC2,NME1,PEBP1,PHB2,PHB,UBA52,UBB,UBC,CPT1C,SAMM50,TOMM7,FIS1,RHOT2,QTRT1
GO: Cellular Component	GO:0000276	mitochondrial proton-transporting ATP synthase complex, coupling factor F(o)	0.0002148	0.1633	0.002236	0.01613	4	12	ATP5MC2,ATP5ME,ATP5PO,ATP5MF
GO: Cellular Component	GO:0031968	organelle outer membrane	0.0002194	0.1667	0.002253	0.01625	16	213	SLC25A4,ATP5MC2,NME1,PEBP1,PHB2,PHB,UBA52,UBB,UBC,CPT1C,SAMM50,TOMM7,FIS1,RHOT2,NUTF2,QTRT1
GO: Cellular Component	GO:0098573	intrinsic component of mitochondrial membrane	0.0002398	0.1823	0.00243	0.01753	9	78	COA3,SLC25A4,CHCHD6,UQCC3,SPG7,TMEM11,SMDT1,FIS1,RHOT2
GO: Cellular Component	GO:0019867	outer membrane	0.0002439	0.1854	0.002439	0.01759	16	215	SLC25A4,ATP5MC2,NME1,PEBP1,PHB2,PHB,UBA52,UBB,UBC,CPT1C,SAMM50,TOMM7,FIS1,RHOT2,NUTF2,QTRT1
GO: Cellular Component	GO:0005730	nucleolus	0.0002518	0.1914	0.002485	0.01792	63	1495	POP7,RPL26,RPL31,RPS3,RPS6,RPS9,RPS11,RPS14,NAA10,POLR1H,FANCG,MCRS1,NOP10,ACTL6B,MAD2L2,NOP56,RPAIN,C19orf53,ZNF622,APEX1,ANAPC11,NHP2,NSUN5,SIRT2,CCT5,EXOSC7,EDF1,SURF2,IMP4,SNU13,EBNA1BP2,PRDX1,RPL35,RPL13A,DCTN3,CDK4,TSEN34,TXN2,EXOSC4,RPL36,POLR2F,POLR2H,POLR2I,POLR2L,DDX56,IDH3G,PPP1CA,DNTTIP1,RPS19BP1,CSTB,ENDOV,EXOSC5,EIF6,SDHAF2,CIAPIN1,PIH1D1,COG7,TIMM13,MRTO4,JPT1,RPL7A,RPL13,RPL18
GO: Cellular Component	GO:0005736	RNA polymerase I complex	0.0003037	0.2308	0.002959	0.02134	4	13	POLR1H,POLR2F,POLR2H,POLR2L
GO: Cellular Component	GO:0045202	synapse	0.0003422	0.2601	0.003292	0.02374	62	1482	RPL26,RPL30,RPL29,RPL31,RPL37,RPL38,RPLP0,RPLP2,RPS3,RPS9,ACTB,RPS14,RPS15,ACTG1,RPS18,RPS21,AKR1A1,NRN1,ALDOC,FLOT2,SGTA,SIRT2,NSG1,SNCG,VPS11,GAPDH,FXYD6,RPL10A,LIN7B,BLVRB,GNG3,RPL14,CORO1A,ATP6V0D1,PEBP1,CFL1,PARK7,PHB2,TUFM,PHB,UBA52,AP2M1,CPT1C,PIN1,CLTA,PICK1,RPL36,PORCN,PPP1CA,PPP2R1A,PRKCZ,NDUFS7,PSMA7,PSMC4,PSMC5,DBI,ARPC2,ENO1,RPL7A,RPL8,RPL18,RPL19
GO: Cellular Component	GO:0008180	COP9 signalosome	0.0003589	0.2728	0.003324	0.02397	6	36	STOML2,DYNLL1,ATP5F1A,COPS6,GPS1,COPS7B
GO: Cellular Component	GO:0098556	cytoplasmic side of rough endoplasmic reticulum membrane	0.0003631	0.2759	0.003324	0.02397	3	6	RPL27,RPS28,RPS29
GO: Cellular Component	GO:0045261	proton-transporting ATP synthase complex, catalytic core F(1)	0.0003631	0.2759	0.003324	0.02397	3	6	ATP5F1EP2,ATP5F1A,ATP5F1B
GO: Cellular Component	GO:0000275	mitochondrial proton-transporting ATP synthase complex, catalytic sector F(1)	0.0003631	0.2759	0.003324	0.02397	3	6	ATP5F1EP2,ATP5F1A,ATP5F1B
GO: Cellular Component	GO:0045263	proton-transporting ATP synthase complex, coupling factor F(o)	0.0004162	0.3163	0.003766	0.02716	4	14	ATP5MC2,ATP5ME,ATP5PO,ATP5MF
GO: Cellular Component	GO:0031300	intrinsic component of organelle membrane	0.0004336	0.3295	0.003877	0.02796	24	418	CREB3,COA3,SLC25A4,CHCHD6,YIF1B,ERGIC3,UQCC3,SPG7,AUP1,DPM2,TMEM11,YIF1A,CPT1C,SLC35A2,PEX16,ELOVL1,PORCN,SMDT1,EMC9,FIS1,DOLPP1,RHOT2,BCAP31,SLC35B1
GO: Cellular Component	GO:0005665	RNA polymerase II, core complex	0.0005555	0.4222	0.004782	0.03448	4	15	POLR2F,POLR2H,POLR2I,POLR2L
GO: Cellular Component	GO:0071001	U4/U6 snRNP	0.0005638	0.4285	0.004782	0.03448	8	70	RBMX2,LSM2,SNRPD2,LSM7,SNU13,PRPF4,SF3B5,RNF113A
GO: Cellular Component	GO:0097526	spliceosomal tri-snRNP complex	0.0005638	0.4285	0.004782	0.03448	8	70	RBMX2,LSM2,SNRPD2,LSM7,SNU13,PRPF4,SF3B5,RNF113A
GO: Cellular Component	GO:0046540	U4/U6 x U5 tri-snRNP complex	0.0005638	0.4285	0.004782	0.03448	8	70	RBMX2,LSM2,SNRPD2,LSM7,SNU13,PRPF4,SF3B5,RNF113A
GO: Cellular Component	GO:0036452	ESCRT complex	0.0005663	0.4304	0.004782	0.03448	5	26	VPS25,CHMP2A,SNF8,CHMP6,VPS28
GO: Cellular Component	GO:0016272	prefoldin complex	0.0006227	0.4732	0.0052	0.0375	3	7	PFDN6,PFDN1,PFDN5
GO: Cellular Component	GO:0005689	U12-type spliceosomal complex	0.0006798	0.5166	0.005575	0.0402	5	27	SNRPD2,LSM7,ZMAT5,SF3B5,SNRNP25
GO: Cellular Component	GO:0005687	U4 snRNP	0.0006822	0.5185	0.005575	0.0402	8	72	RBMX2,LSM2,SNRPD2,LSM7,SNU13,PRPF4,SF3B5,RNF113A
GO: Cellular Component	GO:0005684	U2-type spliceosomal complex	0.0006994	0.5315	0.005655	0.04078	9	90	CCDC12,RBMX2,LSM2,SNRPD2,LSM7,SNU13,PRPF4,SF3B5,RNF113A
GO: Cellular Component	GO:0033178	proton-transporting two-sector ATPase complex, catalytic domain	0.0009282	0.7054	0.007425	0.05355	4	17	ATP5F1EP2,ATP5F1A,ATP5F1B,ATP6AP1
GO: Cellular Component	GO:0005732	small nucleolar ribonucleoprotein complex	0.0009567	0.7271	0.007574	0.05462	5	29	POP7,NOP10,NOP56,NHP2,SNU13
GO: Cellular Component	GO:0030120	vesicle coat	0.00099	0.7524	0.007757	0.05594	7	59	PEF1,SEC13,TMED3,COPE,AP2M1,AP2S1,CLTA
GO: Cellular Component	GO:0031902	late endosome membrane	0.001062	0.8068	0.008232	0.05936	11	135	LAMTOR2,NSG1,VPS11,CHMP2A,CD63,SNF8,YIPF2,STX8,LAMTOR1,CHMP6,VPS28
GO: Cellular Component	GO:1902562	H4 histone acetyltransferase complex	0.001085	0.8245	0.008329	0.06006	6	44	ACTB,MCRS1,ACTL6B,RUVBL1,RUVBL2,POLE4
GO: Cellular Component	GO:0005763	mitochondrial small ribosomal subunit	0.001123	0.8534	0.00845	0.06093	5	30	MRPS12,MRPS26,MRPS11,MRPS18A,MRPS2
GO: Cellular Component	GO:0000314	organellar small ribosomal subunit	0.001123	0.8534	0.00845	0.06093	5	30	MRPS12,MRPS26,MRPS11,MRPS18A,MRPS2
GO: Cellular Component	GO:0005685	U1 snRNP	0.001371	1	0.01015	0.07321	8	80	RBMX2,LSM2,SNRPD2,LSM7,SNU13,PRPF4,SF3B5,RNF113A
GO: Cellular Component	GO:0031305	integral component of mitochondrial inner membrane	0.001376	1	0.01015	0.07321	6	46	COA3,CHCHD6,UQCC3,SPG7,TMEM11,SMDT1
GO: Cellular Component	GO:0031304	intrinsic component of mitochondrial inner membrane	0.001542	1	0.01127	0.08126	6	47	COA3,CHCHD6,UQCC3,SPG7,TMEM11,SMDT1
GO: Cellular Component	GO:0035267	NuA4 histone acetyltransferase complex	0.001773	1	0.01271	0.09164	4	20	ACTB,ACTL6B,RUVBL1,RUVBL2
GO: Cellular Component	GO:0043189	H4/H2A histone acetyltransferase complex	0.001773	1	0.01271	0.09164	4	20	ACTB,ACTL6B,RUVBL1,RUVBL2
GO: Cellular Component	GO:0000814	ESCRT II complex	0.002123	1	0.01508	0.1088	2	3	VPS25,SNF8
GO: Cellular Component	GO:0005791	rough endoplasmic reticulum	0.002872	1	0.02021	0.1457	9	110	RPL27,RPN1,RPN2,RPS21,RPS28,RPS29,SSR4,PEBP1,RPL18
GO: Cellular Component	GO:0008540	proteasome regulatory particle, base subcomplex	0.00354	1	0.02438	0.1758	3	12	PSMC3,PSMC4,PSMC5
GO: Cellular Component	GO:0000812	Swr1 complex	0.00354	1	0.02438	0.1758	3	12	ZNHIT1,RUVBL1,RUVBL2
GO: Cellular Component	GO:0032588	trans-Golgi network membrane	0.00356	1	0.02438	0.1758	8	93	RABEPK,NSG1,AP1M1,ARFIP2,CLTA,PICK1,COG7,ARFRP1
GO: Cellular Component	GO:0030176	integral component of endoplasmic reticulum membrane	0.003683	1	0.02499	0.1802	11	158	CREB3,ERGIC3,AUP1,DPM2,CPT1C,ELOVL1,PORCN,EMC9,DOLPP1,BCAP31,SLC35B1
GO: Cellular Component	GO:0005682	U5 snRNP	0.003944	1	0.02641	0.1905	10	137	WDR83,CCDC12,RBMX2,LSM2,SNRPD2,LSM7,SNU13,PRPF4,SF3B5,RNF113A
GO: Cellular Component	GO:1902493	acetyltransferase complex	0.004057	1	0.02641	0.1905	8	95	ACTB,NAA10,MCRS1,ACTL6B,NAA38,RUVBL1,RUVBL2,POLE4
GO: Cellular Component	GO:0031248	protein acetyltransferase complex	0.004057	1	0.02641	0.1905	8	95	ACTB,NAA10,MCRS1,ACTL6B,NAA38,RUVBL1,RUVBL2,POLE4
GO: Cellular Component	GO:0097346	INO80-type complex	0.004162	1	0.02641	0.1905	4	25	MCRS1,ZNHIT1,RUVBL1,RUVBL2
GO: Cellular Component	GO:0030687	preribosome, large subunit precursor	0.004162	1	0.02641	0.1905	4	25	ZNF622,EBNA1BP2,EIF6,MRTO4
GO: Cellular Component	GO:0072589	box H/ACA scaRNP complex	0.00417	1	0.02641	0.1905	2	4	NOP10,NHP2
GO: Cellular Component	GO:0097452	GAIT complex	0.00417	1	0.02641	0.1905	2	4	GAPDH,RPL13A
GO: Cellular Component	GO:0033181	plasma membrane proton-transporting V-type ATPase complex	0.00417	1	0.02641	0.1905	2	4	ATP6AP1,ATP6V0D1
GO: Cellular Component	GO:0005686	U2 snRNP	0.004324	1	0.02716	0.1959	8	96	RBMX2,LSM2,SNRPD2,LSM7,SNU13,PRPF4,SF3B5,RNF113A
GO: Cellular Component	GO:0005681	spliceosomal complex	0.004582	1	0.02823	0.2035	12	186	WDR83,CCDC12,RBMX2,LSM2,SNRPD2,LSM7,ZMAT5,SNU13,PRPF4,SF3B5,RNF113A,SNRNP25
GO: Cellular Component	GO:0005688	U6 snRNP	0.004605	1	0.02823	0.2035	8	97	RBMX2,LSM2,SNRPD2,LSM7,SNU13,PRPF4,SF3B5,RNF113A
GO: Cellular Component	GO:0120115	Lsm2-8 complex	0.004605	1	0.02823	0.2035	8	97	RBMX2,LSM2,SNRPD2,LSM7,SNU13,PRPF4,SF3B5,RNF113A
GO: Cellular Component	GO:0098791	Golgi apparatus subcompartment	0.004761	1	0.02895	0.2087	20	391	RABEPK,NSG1,CHID1,INPP5K,NSFL1C,AP1M1,TMED3,B4GALT7,LYPLA2,EIPR1,ARFIP2,YIPF2,CLTA,TRAPPC6A,PICK1,STX8,COG7,PLEKHJ1,BCAP31,ARFRP1
GO: Cellular Component	GO:0005802	trans-Golgi network	0.005206	1	0.0314	0.2265	15	263	RABEPK,NSG1,CHID1,INPP5K,AP1M1,EIPR1,ARFIP2,YIPF2,CLTA,TRAPPC6A,PICK1,STX8,COG7,PLEKHJ1,ARFRP1
GO: Cellular Component	GO:0031227	intrinsic component of endoplasmic reticulum membrane	0.005337	1	0.03194	0.2303	11	166	CREB3,ERGIC3,AUP1,DPM2,CPT1C,ELOVL1,PORCN,EMC9,DOLPP1,BCAP31,SLC35B1
GO: Cellular Component	GO:0098805	whole membrane	0.005392	1	0.03202	0.2309	65	1760	RABEPK,RPN2,ACTB,PEF1,MAP1LC3B2,STOML2,SEC13,FLOT2,LAMTOR2,SLC25A4,SLC25A5,SGTA,TMEM138,WDR83,VPS25,NPRL2,NSG1,DYNLL1,ATP5F1A,ATP5F1B,ATP5MC2,VPS11,ATP6V0B,ATP6AP1,CHMP2A,BSG,AP1M1,NME1,TMED3,CORO1A,WDR45,ATP6V0D1,PEBP1,SLC2A6,CD63,SNF8,PARK7,COPE,PHB2,HMOX2,PHB,UBA52,YIPF2,UBB,UBC,AP2M1,AP2S1,CPT1C,CLTA,KXD1,PEX16,SAMM50,PICK1,STX8,TOMM7,PRKCZ,DDOST,LAMTOR1,CHMP6,FIS1,RHOT2,VPS28,NUTF2,QTRT1,ENO1
GO: Cellular Component	GO:0005744	TIM23 mitochondrial import inner membrane translocase complex	0.005628	1	0.03265	0.2354	3	14	SLC25A6,TIMM50,ROMO1
GO: Cellular Component	GO:0000177	cytoplasmic exosome (RNase complex)	0.005628	1	0.03265	0.2354	3	14	EXOSC7,EXOSC4,EXOSC5
GO: Cellular Component	GO:0036020	endolysosome membrane	0.005628	1	0.03265	0.2354	3	14	AP2M1,AP2S1,CLTA
GO: Cellular Component	GO:0030684	preribosome	0.005697	1	0.0328	0.2365	7	80	NOP56,ZNF622,IMP4,SNU13,EBNA1BP2,EIF6,MRTO4
GO: Cellular Component	GO:1904813	ficolin-1-rich granule lumen	0.006325	1	0.03587	0.2587	9	124	ALDOC,APEH,PKM,CSTB,PSMB7,PSMC3,PSMD3,PSMD7,PSMD11
GO: Cellular Component	GO:0101002	ficolin-1-rich granule	0.006325	1	0.03587	0.2587	9	124	ALDOC,APEH,PKM,CSTB,PSMB7,PSMC3,PSMD3,PSMD7,PSMD11
GO: Cellular Component	GO:0010008	endosome membrane	0.006718	1	0.03706	0.2672	23	487	RABEPK,LAMTOR2,WDR83,VPS25,NSG1,VPS11,ATP6V0B,ATP6AP1,CHMP2A,ATP6V0D1,CD63,SNF8,UBA52,YIPF2,UBB,UBC,AP2M1,AP2S1,CLTA,STX8,LAMTOR1,CHMP6,VPS28
GO: Cellular Component	GO:0042719	mitochondrial intermembrane space protein transporter complex	0.006827	1	0.03706	0.2672	2	5	TIMM13,TIMM8B
GO: Cellular Component	GO:0097361	CIA complex	0.006827	1	0.03706	0.2672	2	5	CIAO2B,MMS19
GO: Cellular Component	GO:0031429	box H/ACA snoRNP complex	0.006827	1	0.03706	0.2672	2	5	NOP10,NHP2
GO: Cellular Component	GO:0090661	box H/ACA telomerase RNP complex	0.006827	1	0.03706	0.2672	2	5	NOP10,NHP2
GO: Cellular Component	GO:1990726	Lsm1-7-Pat1 complex	0.006827	1	0.03706	0.2672	2	5	LSM2,LSM7
GO: Cellular Component	GO:0031011	Ino80 complex	0.006896	1	0.03717	0.268	3	15	MCRS1,RUVBL1,RUVBL2
GO: Cellular Component	GO:0030867	rough endoplasmic reticulum membrane	0.007182	1	0.03844	0.2772	4	29	RPL27,RPS28,RPS29,SSR4
GO: Cellular Component	GO:0005793	endoplasmic reticulum-Golgi intermediate compartment	0.007366	1	0.03914	0.2822	9	127	YIF1B,ERGIC3,ATP6AP1,YIF1A,MYDGF,LMAN2,TMED3,SLC35C2,BCAP31
GO: Cellular Component	GO:0016591	RNA polymerase II, holoenzyme	0.007415	1	0.03914	0.2822	7	84	MMS19,POLR2F,POLR2H,POLR2I,POLR2L,PAF1,PSMC5
GO: Cellular Component	GO:0042645	mitochondrial nucleoid	0.007602	1	0.03957	0.2854	5	46	MPG,SLC25A5,ATP5F1B,HSD17B10,TUFM
GO: Cellular Component	GO:0009295	nucleoid	0.007602	1	0.03957	0.2854	5	46	MPG,SLC25A5,ATP5F1B,HSD17B10,TUFM
GO: Cellular Component	GO:0098554	cytoplasmic side of endoplasmic reticulum membrane	0.00832	1	0.04301	0.3102	3	16	RPL27,RPS28,RPS29
GO: Cellular Component	GO:0055029	nuclear DNA-directed RNA polymerase complex	0.008701	1	0.04468	0.3222	8	108	POLR1H,MMS19,POLR2F,POLR2H,POLR2I,POLR2L,PAF1,PSMC5
GO: Cellular Component	GO:0031984	organelle subcompartment	0.00896	1	0.0457	0.3296	20	415	RABEPK,NSG1,CHID1,INPP5K,NSFL1C,AP1M1,TMED3,B4GALT7,LYPLA2,EIPR1,ARFIP2,YIPF2,CLTA,TRAPPC6A,PICK1,STX8,COG7,PLEKHJ1,BCAP31,ARFRP1
GO: Cellular Component	GO:1902555	endoribonuclease complex	0.009122	1	0.04618	0.333	4	31	POP7,TARBP2,HSD17B10,TSEN34
GO: Cellular Component	GO:0000428	DNA-directed RNA polymerase complex	0.009176	1	0.04618	0.333	8	109	POLR1H,MMS19,POLR2F,POLR2H,POLR2I,POLR2L,PAF1,PSMC5
GO: Cellular Component	GO:0005774	vacuolar membrane	0.009414	1	0.04707	0.3394	20	417	RPN2,MAP1LC3B2,SEC13,LAMTOR2,TMEM138,NPRL2,VPS11,ATP6V0B,AP1M1,ATP6V0D1,SLC2A6,CD63,UBA52,AP2M1,AP2S1,CLTA,KXD1,STX8,DDOST,LAMTOR1
GO: Cellular Component	GO:0000176	nuclear exosome (RNase complex)	0.009904	1	0.049	0.3534	3	17	EXOSC7,EXOSC4,EXOSC5
GO: Cellular Component	GO:0005851	eukaryotic translation initiation factor 2B complex	0.01006	1	0.049	0.3534	2	6	EIF2B3,EIF2B2
GO: Cellular Component	GO:0097433	dense body	0.01006	1	0.049	0.3534	2	6	ACTB,ACTG1
GO: Cellular Component	GO:0071986	Ragulator complex	0.01006	1	0.049	0.3534	2	6	LAMTOR2,LAMTOR1
Pathway	1268681	Formation of a pool of free 40S subunits	6.644e-48	1.141e-44	8.387e-45	6.731e-44	51	107	RPL26,RPL27,RPL30,RPL27A,RPL28,RPL29,RPL31,RPL32,RPL34,RPL36AL,RPL37,RPL37A,RPL38,RPLP0,RPLP1,RPLP2,RPS3,RPS4Y1,RPS5,RPS6,RPS8,RPS9,RPS11,RPS12,RPS14,RPS15,RPS16,RPS18,RPS21,RPS24,RPS28,RPS29,FAU,EIF3C,EIF3G,EIF3H,EIF3I,RPL10A,EIF3K,RPL14,RPL35,RPL13A,UBA52,RPL36,EIF3CL,RPL26L1,RPL7A,RPL8,RPL13,RPL18,RPL19
Pathway	1268678	Translation	9.769e-48	1.677e-44	8.387e-45	6.731e-44	60	165	RPL26,RPL27,RPL30,RPL27A,RPL28,RPL29,RPL31,RPL32,RPL34,RPL36AL,RPL37,RPL37A,RPL38,RPLP0,RPLP1,RPLP2,RPN1,RPN2,RPS3,RPS4Y1,RPS5,RPS6,RPS8,RPS9,RPS11,RPS12,RPS14,RPS15,RPS16,RPS18,RPS21,RPS24,RPS28,RPS29,FAU,APEH,EEF1A1P5,EIF3C,EIF3G,EIF3H,EIF3I,SSR4,RPL10A,EIF2B3,EIF2B2,EIF3K,RPL14,RPL35,RPL13A,UBA52,RPL36,DDOST,EIF3CL,EEF1B2,RPL26L1,RPL7A,RPL8,RPL13,RPL18,RPL19
Pathway	1268680	Cap-dependent Translation Initiation	6.13e-46	1.053e-42	2.631e-43	2.112e-42	53	127	RPL26,RPL27,RPL30,RPL27A,RPL28,RPL29,RPL31,RPL32,RPL34,RPL36AL,RPL37,RPL37A,RPL38,RPLP0,RPLP1,RPLP2,RPS3,RPS4Y1,RPS5,RPS6,RPS8,RPS9,RPS11,RPS12,RPS14,RPS15,RPS16,RPS18,RPS21,RPS24,RPS28,RPS29,FAU,EIF3C,EIF3G,EIF3H,EIF3I,RPL10A,EIF2B3,EIF2B2,EIF3K,RPL14,RPL35,RPL13A,UBA52,RPL36,EIF3CL,RPL26L1,RPL7A,RPL8,RPL13,RPL18,RPL19
Pathway	1268679	Eukaryotic Translation Initiation	6.13e-46	1.053e-42	2.631e-43	2.112e-42	53	127	RPL26,RPL27,RPL30,RPL27A,RPL28,RPL29,RPL31,RPL32,RPL34,RPL36AL,RPL37,RPL37A,RPL38,RPLP0,RPLP1,RPLP2,RPS3,RPS4Y1,RPS5,RPS6,RPS8,RPS9,RPS11,RPS12,RPS14,RPS15,RPS16,RPS18,RPS21,RPS24,RPS28,RPS29,FAU,EIF3C,EIF3G,EIF3H,EIF3I,RPL10A,EIF2B3,EIF2B2,EIF3K,RPL14,RPL35,RPL13A,UBA52,RPL36,EIF3CL,RPL26L1,RPL7A,RPL8,RPL13,RPL18,RPL19
Pathway	1268686	GTP hydrolysis and joining of the 60S ribosomal subunit	6.176e-45	1.06e-41	1.767e-42	1.418e-41	51	119	RPL26,RPL27,RPL30,RPL27A,RPL28,RPL29,RPL31,RPL32,RPL34,RPL36AL,RPL37,RPL37A,RPL38,RPLP0,RPLP1,RPLP2,RPS3,RPS4Y1,RPS5,RPS6,RPS8,RPS9,RPS11,RPS12,RPS14,RPS15,RPS16,RPS18,RPS21,RPS24,RPS28,RPS29,FAU,EIF3C,EIF3G,EIF3H,EIF3I,RPL10A,EIF3K,RPL14,RPL35,RPL13A,UBA52,RPL36,EIF3CL,RPL26L1,RPL7A,RPL8,RPL13,RPL18,RPL19
Pathway	1268688	L13a-mediated translational silencing of Ceruloplasmin expression	6.176e-45	1.06e-41	1.767e-42	1.418e-41	51	119	RPL26,RPL27,RPL30,RPL27A,RPL28,RPL29,RPL31,RPL32,RPL34,RPL36AL,RPL37,RPL37A,RPL38,RPLP0,RPLP1,RPLP2,RPS3,RPS4Y1,RPS5,RPS6,RPS8,RPS9,RPS11,RPS12,RPS14,RPS15,RPS16,RPS18,RPS21,RPS24,RPS28,RPS29,FAU,EIF3C,EIF3G,EIF3H,EIF3I,RPL10A,EIF3K,RPL14,RPL35,RPL13A,UBA52,RPL36,EIF3CL,RPL26L1,RPL7A,RPL8,RPL13,RPL18,RPL19
Pathway	1268690	Eukaryotic Translation Elongation	2.462e-44	4.228e-41	6.039e-42	4.847e-41	47	98	RPL26,RPL27,RPL30,RPL27A,RPL28,RPL29,RPL31,RPL32,RPL34,RPL36AL,RPL37,RPL37A,RPL38,RPLP0,RPLP1,RPLP2,RPS3,RPS4Y1,RPS5,RPS6,RPS8,RPS9,RPS11,RPS12,RPS14,RPS15,RPS16,RPS18,RPS21,RPS24,RPS28,RPS29,FAU,EEF1A1P5,RPL10A,RPL14,RPL35,RPL13A,UBA52,RPL36,EEF1B2,RPL26L1,RPL7A,RPL8,RPL13,RPL18,RPL19
Pathway	83036	Ribosome	2.952e-43	5.069e-40	6.337e-41	5.086e-40	55	154	RPL26,RPL27,RPL30,RPL27A,RPL28,RPL29,RPL31,RPL32,RPL34,RPL36AL,RPL37,RPL37A,RPL38,RPLP0,RPLP1,RPLP2,MRPS12,RPS3,RPS4Y1,RPS5,RPS6,RPS8,RPS9,RPS11,RPS12,RPS14,MRPL27,RPS15,RPS16,RPS18,RPS21,RPS24,RPS28,RPS29,FAU,MRPL28,RPL10A,RPL14,RPL35,RPL13A,UBA52,RPL36,MRPL14,MRPS11,MRPL20,MRPL2,MRPS18A,MRPL4,MRPS2,RPL26L1,RPL7A,RPL8,RPL13,RPL18,RPL19
Pathway	1268692	Eukaryotic Translation Termination	4.121e-43	7.076e-40	7.862e-41	6.31e-40	46	97	RPL26,RPL27,RPL30,RPL27A,RPL28,RPL29,RPL31,RPL32,RPL34,RPL36AL,RPL37,RPL37A,RPL38,RPLP0,RPLP1,RPLP2,RPS3,RPS4Y1,RPS5,RPS6,RPS8,RPS9,RPS11,RPS12,RPS14,RPS15,RPS16,RPS18,RPS21,RPS24,RPS28,RPS29,FAU,APEH,RPL10A,RPL14,RPL35,RPL13A,UBA52,RPL36,RPL26L1,RPL7A,RPL8,RPL13,RPL18,RPL19
Pathway	1268689	SRP-dependent cotranslational protein targeting to membrane	8.304e-43	1.426e-39	1.426e-40	1.144e-39	49	116	RPL26,RPL27,RPL30,RPL27A,RPL28,RPL29,RPL31,RPL32,RPL34,RPL36AL,RPL37,RPL37A,RPL38,RPLP0,RPLP1,RPLP2,RPN1,RPN2,RPS3,RPS4Y1,RPS5,RPS6,RPS8,RPS9,RPS11,RPS12,RPS14,RPS15,RPS16,RPS18,RPS21,RPS24,RPS28,RPS29,FAU,SSR4,RPL10A,RPL14,RPL35,RPL13A,UBA52,RPL36,DDOST,RPL26L1,RPL7A,RPL8,RPL13,RPL18,RPL19
Pathway	1268691	Peptide chain elongation	1.08e-42	1.854e-39	1.545e-40	1.24e-39	45	93	RPL26,RPL27,RPL30,RPL27A,RPL28,RPL29,RPL31,RPL32,RPL34,RPL36AL,RPL37,RPL37A,RPL38,RPLP0,RPLP1,RPLP2,RPS3,RPS4Y1,RPS5,RPS6,RPS8,RPS9,RPS11,RPS12,RPS14,RPS15,RPS16,RPS18,RPS21,RPS24,RPS28,RPS29,FAU,RPL10A,RPL14,RPL35,RPL13A,UBA52,RPL36,RPL26L1,RPL7A,RPL8,RPL13,RPL18,RPL19
Pathway	1269120	Viral mRNA Translation	1.08e-42	1.854e-39	1.545e-40	1.24e-39	45	93	RPL26,RPL27,RPL30,RPL27A,RPL28,RPL29,RPL31,RPL32,RPL34,RPL36AL,RPL37,RPL37A,RPL38,RPLP0,RPLP1,RPLP2,RPS3,RPS4Y1,RPS5,RPS6,RPS8,RPS9,RPS11,RPS12,RPS14,RPS15,RPS16,RPS18,RPS21,RPS24,RPS28,RPS29,FAU,RPL10A,RPL14,RPL35,RPL13A,UBA52,RPL36,RPL26L1,RPL7A,RPL8,RPL13,RPL18,RPL19
Pathway	M189	Ribosome	1.416e-42	2.432e-39	1.87e-40	1.501e-39	44	88	RPL26,RPL27,RPL30,RPL27A,RPL28,RPL29,RPL31,RPL32,RPL34,RPL36AL,RPL37,RPL37A,RPL38,RPLP0,RPLP1,RPLP2,RPS3,RPS4Y1,RPS5,RPS6,RPS8,RPS9,RPS11,RPS12,RPS15,RPS16,RPS18,RPS21,RPS24,RPS28,RPS29,FAU,RPL10A,RPL14,RPL35,RPL13A,UBA52,RPL36,RPL26L1,RPL7A,RPL8,RPL13,RPL18,RPL19
Pathway	1339156	Selenocysteine synthesis	6.802e-42	1.168e-38	8.342e-40	6.695e-39	45	96	RPL26,RPL27,RPL30,RPL27A,RPL28,RPL29,RPL31,RPL32,RPL34,RPL36AL,RPL37,RPL37A,RPL38,RPLP0,RPLP1,RPLP2,RPS3,RPS4Y1,RPS5,RPS6,RPS8,RPS9,RPS11,RPS12,RPS14,RPS15,RPS16,RPS18,RPS21,RPS24,RPS28,RPS29,FAU,RPL10A,RPL14,RPL35,RPL13A,UBA52,RPL36,RPL26L1,RPL7A,RPL8,RPL13,RPL18,RPL19
Pathway	1269718	Nonsense Mediated Decay (NMD) independent of the Exon Junction Complex (EJC)	6.977e-41	1.198e-37	7.987e-39	6.41e-38	45	100	RPL26,RPL27,RPL30,RPL27A,RPL28,RPL29,RPL31,RPL32,RPL34,RPL36AL,RPL37,RPL37A,RPL38,RPLP0,RPLP1,RPLP2,RPS3,RPS4Y1,RPS5,RPS6,RPS8,RPS9,RPS11,RPS12,RPS14,RPS15,RPS16,RPS18,RPS21,RPS24,RPS28,RPS29,FAU,RPL10A,RPL14,RPL35,RPL13A,UBA52,RPL36,RPL26L1,RPL7A,RPL8,RPL13,RPL18,RPL19
Pathway	1269056	Infectious disease	1.826e-39	3.135e-36	1.959e-37	1.572e-36	77	393	RPL26,RPL27,RPL30,RPL27A,RPL28,RPL29,RPL31,RPL32,RPL34,RPL36AL,RPL37,RPL37A,RPL38,RPLP0,RPLP1,RPLP2,RPS3,RPS4Y1,RPS5,RPS6,RPS8,RPS9,RPS11,RPS12,RPS14,RPS15,RPS16,RPS18,RPS21,RPS24,RPS28,RPS29,FAU,SLC25A4,SLC25A5,SLC25A6,NELFCD,CHMP2A,BANF1,RPL10A,AP1M1,ELOB,RPL14,RPL35,RPL13A,UBA52,UBB,UBC,AP2M1,AP2S1,CLTA,RPL36,POLR2F,POLR2H,POLR2I,POLR2L,PSMA7,PSMB2,PSMB3,PSMB6,PSMB7,PSMC3,PSMC4,PSMC5,PSMD3,PSM…
Pathway	1339149	Selenoamino acid metabolism	1.283e-38	2.203e-35	1.296e-36	1.04e-35	47	123	RPL26,RPL27,RPL30,RPL27A,RPL28,RPL29,RPL31,RPL32,RPL34,RPL36AL,RPL37,RPL37A,RPL38,RPLP0,RPLP1,RPLP2,RPS3,RPS4Y1,RPS5,RPS6,RPS8,RPS9,RPS11,RPS12,RPS14,RPS15,RPS16,RPS18,RPS21,RPS24,RPS28,RPS29,FAU,AHCY,RPL10A,RPL14,RPL35,RPL13A,UBA52,RPL36,QARS1,RPL26L1,RPL7A,RPL8,RPL13,RPL18,RPL19
Pathway	1269115	Influenza Viral RNA Transcription and Replication	2.007e-38	3.446e-35	1.914e-36	1.536e-35	49	138	RPL26,RPL27,RPL30,RPL27A,RPL28,RPL29,RPL31,RPL32,RPL34,RPL36AL,RPL37,RPL37A,RPL38,RPLP0,RPLP1,RPLP2,RPS3,RPS4Y1,RPS5,RPS6,RPS8,RPS9,RPS11,RPS12,RPS14,RPS15,RPS16,RPS18,RPS21,RPS24,RPS28,RPS29,FAU,RPL10A,RPL14,RPL35,RPL13A,UBA52,RPL36,POLR2F,POLR2H,POLR2I,POLR2L,RPL26L1,RPL7A,RPL8,RPL13,RPL18,RPL19
Pathway	1269109	Influenza Life Cycle	3.909e-38	6.712e-35	3.532e-36	2.835e-35	50	147	RPL26,RPL27,RPL30,RPL27A,RPL28,RPL29,RPL31,RPL32,RPL34,RPL36AL,RPL37,RPL37A,RPL38,RPLP0,RPLP1,RPLP2,RPS3,RPS4Y1,RPS5,RPS6,RPS8,RPS9,RPS11,RPS12,RPS14,RPS15,RPS16,RPS18,RPS21,RPS24,RPS28,RPS29,FAU,RPL10A,RPL14,RPL35,RPL13A,UBA52,CLTA,RPL36,POLR2F,POLR2H,POLR2I,POLR2L,RPL26L1,RPL7A,RPL8,RPL13,RPL18,RPL19
Pathway	1269716	Nonsense-Mediated Decay (NMD)	1.095e-37	1.88e-34	8.952e-36	7.184e-35	46	121	RPL26,RPL27,RPL30,RPL27A,RPL28,RPL29,RPL31,RPL32,RPL34,RPL36AL,RPL37,RPL37A,RPL38,RPLP0,RPLP1,RPLP2,RPS3,RPS4Y1,RPS5,RPS6,RPS8,RPS9,RPS11,RPS12,RPS14,RPS15,RPS16,RPS18,RPS21,RPS24,RPS28,RPS29,FAU,RPL10A,RPL14,RPL35,RPL13A,UBA52,RPL36,PPP2R1A,RPL26L1,RPL7A,RPL8,RPL13,RPL18,RPL19
Pathway	1269717	Nonsense Mediated Decay (NMD) enhanced by the Exon Junction Complex (EJC)	1.095e-37	1.88e-34	8.952e-36	7.184e-35	46	121	RPL26,RPL27,RPL30,RPL27A,RPL28,RPL29,RPL31,RPL32,RPL34,RPL36AL,RPL37,RPL37A,RPL38,RPLP0,RPLP1,RPLP2,RPS3,RPS4Y1,RPS5,RPS6,RPS8,RPS9,RPS11,RPS12,RPS14,RPS15,RPS16,RPS18,RPS21,RPS24,RPS28,RPS29,FAU,RPL10A,RPL14,RPL35,RPL13A,UBA52,RPL36,PPP2R1A,RPL26L1,RPL7A,RPL8,RPL13,RPL18,RPL19
Pathway	1269108	Influenza Infection	1.383e-37	2.375e-34	1.079e-35	8.663e-35	51	158	RPL26,RPL27,RPL30,RPL27A,RPL28,RPL29,RPL31,RPL32,RPL34,RPL36AL,RPL37,RPL37A,RPL38,RPLP0,RPLP1,RPLP2,RPS3,RPS4Y1,RPS5,RPS6,RPS8,RPS9,RPS11,RPS12,RPS14,RPS15,RPS16,RPS18,RPS21,RPS24,RPS28,RPS29,FAU,SLC25A6,RPL10A,RPL14,RPL35,RPL13A,UBA52,CLTA,RPL36,POLR2F,POLR2H,POLR2I,POLR2L,RPL26L1,RPL7A,RPL8,RPL13,RPL18,RPL19
Pathway	1427846	rRNA processing in the nucleus and cytosol	4.047e-36	6.949e-33	3.021e-34	2.425e-33	54	193	RPL26,RPL27,RPL30,RPL27A,RPL28,RPL29,RPL31,RPL32,RPL34,RPL36AL,RPL37,RPL37A,RPL38,RPLP0,RPLP1,RPLP2,RPS3,RPS4Y1,RPS5,RPS6,RPS8,RPS9,RPS11,RPS12,RPS14,RPS15,RPS16,RPS18,RPS21,RPS24,RPS28,RPS29,FAU,NOP10,NOP56,NHP2,EXOSC7,RPL10A,IMP4,SNU13,RPL14,RPL35,RPL13A,UBA52,EXOSC4,RPL36,DDX49,EXOSC5,RPL26L1,RPL7A,RPL8,RPL13,RPL18,RPL19
Pathway	1383085	rRNA processing	5.755e-36	9.882e-33	4.118e-34	3.305e-33	55	203	RPL26,RPL27,RPL30,RPL27A,RPL28,RPL29,RPL31,RPL32,RPL34,RPL36AL,RPL37,RPL37A,RPL38,RPLP0,RPLP1,RPLP2,RPS3,RPS4Y1,RPS5,RPS6,RPS8,RPS9,RPS11,RPS12,RPS14,RPS15,RPS16,RPS18,RPS21,RPS24,RPS28,RPS29,FAU,NOP10,NOP56,NHP2,EXOSC7,RPL10A,IMP4,SNU13,RPL14,HSD17B10,RPL35,RPL13A,UBA52,EXOSC4,RPL36,DDX49,EXOSC5,RPL26L1,RPL7A,RPL8,RPL13,RPL18,RPL19
Pathway	1383086	Major pathway of rRNA processing in the nucleolus and cytosol	1.964e-35	3.373e-32	1.349e-33	1.083e-32	52	181	RPL26,RPL27,RPL30,RPL27A,RPL28,RPL29,RPL31,RPL32,RPL34,RPL36AL,RPL37,RPL37A,RPL38,RPLP0,RPLP1,RPLP2,RPS3,RPS4Y1,RPS5,RPS6,RPS8,RPS9,RPS11,RPS12,RPS14,RPS15,RPS16,RPS18,RPS21,RPS24,RPS28,RPS29,FAU,NOP56,EXOSC7,RPL10A,IMP4,SNU13,RPL14,RPL35,RPL13A,UBA52,EXOSC4,RPL36,DDX49,EXOSC5,RPL26L1,RPL7A,RPL8,RPL13,RPL18,RPL19
Pathway	1270158	Metabolism of amino acids and derivatives	2.199e-31	3.776e-28	1.452e-29	1.165e-28	66	367	RPL26,RPL27,RPL30,RPL27A,RPL28,RPL29,RPL31,RPL32,RPL34,RPL36AL,RPL37,RPL37A,RPL38,RPLP0,RPLP1,RPLP2,RPS3,RPS4Y1,RPS5,RPS6,RPS8,RPS9,RPS11,RPS12,RPS14,RPS15,RPS16,RPS18,RPS21,RPS24,RPS28,RPS29,FAU,AHCY,BCAT2,RPL10A,OAZ1,RPL14,GCAT,HSD17B10,RPL35,RPL13A,UBA52,GRHPR,RPL36,PSMA7,PSMB2,PSMB3,PSMB6,PSMB7,PSMC3,PSMC4,PSMC5,PSMD3,PSMD7,PSMD8,PSMD11,IVD,QARS1,SEM1,RPL26L1,RPL7A,RPL8,RPL13,RPL18,RPL19
Pathway	1268677	Metabolism of proteins	1.552e-29	2.664e-26	9.867e-28	7.919e-27	139	1631	RPL26,RPL27,RPL30,RPL27A,RPL28,RPL29,RPL31,RPL32,RPL34,RPL36AL,RPL37,RPL37A,RPL38,RPLP0,RPLP1,RPLP2,RPN1,RPN2,RPS3,RPS4Y1,RPS5,RPS6,RNF181,RPS8,RPS9,ACTB,RPS11,RPS12,RPS14,RPS15,RPS16,RPS18,RPS21,RPS24,RPS28,RPS29,NRN1,TUBB3,FAU,MCRS1,PFDN6,SEC13,NAGK,NOP56,SLC25A4,SLC25A6,CHCHD5,OTUB1,APEH,CCT7,EEF1A1P5,MSRB2,RUVBL1,CCT5,TIMM50,DYNLL1,EIF3C,EIF3G,EIF3H,EIF3I,EXOSC7,TRAPPC2L,ATP5F1A,ATP5F1B,SSR4,…
Pathway	1269649	Gene Expression	4.545e-22	7.804e-19	2.787e-20	2.237e-19	135	1844	POP7,RPL26,RPL27,RPL30,RPL27A,RPL28,RPL29,RPL31,RPL32,CTU2,RPL34,RPL36AL,RPL37,RPL37A,RPL38,RPLP0,RPLP1,RPLP2,RPN1,RPN2,RPS3,RPS4Y1,RPS5,RPS6,RPS8,RPS9,ACTB,RPS11,RPS12,RPS14,RPS15,RPS16,RPS18,LAGE3,RPS21,RPS24,RPS28,RPS29,POLR1H,FARSA,FAU,NOP10,LAMTOR2,NOP56,NELFCD,PUF60,TRMT1,APEH,NHP2,EEF1A1P5,NXT1,SAP30BP,EIF3C,EIF3G,LSM2,EIF3H,EIF3I,EXOSC7,SNRPD2,LSM7,SSR4,RPL10A,ZMAT5,IMP4,EIF2B3,EIF2B2,EIF…
Pathway	1268854	Disease	8.875e-22	1.524e-18	5.255e-20	4.217e-19	86	867	RPL26,RPL27,RPL30,RPL27A,RPL28,RPL29,RPL31,RPL32,RPL34,RPL36AL,RPL37,RPL37A,RPL38,RPLP0,RPLP1,RPLP2,RPS3,RPS4Y1,RPS5,RPS6,RPS8,RPS9,RPS11,RPS12,RPS14,RPS15,RPS16,RPS18,RPS21,RPS24,RPS28,RPS29,FAU,SLC25A4,SLC25A5,SLC25A6,NELFCD,CHMP2A,BANF1,RPL10A,NFKBIB,AP1M1,MLST8,ELOB,RPL14,PRDX2,PEBP1,PRDX1,RPL35,RPL13A,CDC25B,PHB,UBA52,UBB,UBC,AP2M1,AP2S1,CLTA,RPL36,POLR2F,POLR2H,POLR2I,POLR2L,PORCN,PPP2R1A,P…
Pathway	1268682	Formation of the ternary complex, and subsequently, the 43S complex	1.78e-20	3.056e-17	1.019e-18	8.175e-18	23	55	RPS3,RPS4Y1,RPS5,RPS6,RPS8,RPS9,RPS11,RPS12,RPS14,RPS15,RPS16,RPS18,RPS21,RPS24,RPS28,RPS29,FAU,EIF3C,EIF3G,EIF3H,EIF3I,EIF3K,EIF3CL
Pathway	1268685	Ribosomal scanning and start codon recognition	7.076e-19	1.215e-15	3.919e-17	3.146e-16	23	63	RPS3,RPS4Y1,RPS5,RPS6,RPS8,RPS9,RPS11,RPS12,RPS14,RPS15,RPS16,RPS18,RPS21,RPS24,RPS28,RPS29,FAU,EIF3C,EIF3G,EIF3H,EIF3I,EIF3K,EIF3CL
Pathway	1268684	Translation initiation complex formation	1.072e-18	1.841e-15	5.754e-17	4.618e-16	23	64	RPS3,RPS4Y1,RPS5,RPS6,RPS8,RPS9,RPS11,RPS12,RPS14,RPS15,RPS16,RPS18,RPS21,RPS24,RPS28,RPS29,FAU,EIF3C,EIF3G,EIF3H,EIF3I,EIF3K,EIF3CL
Pathway	1268683	Activation of the mRNA upon binding of the cap-binding complex and eIFs, and subsequent binding to 43S	1.611e-18	2.767e-15	8.384e-17	6.729e-16	23	65	RPS3,RPS4Y1,RPS5,RPS6,RPS8,RPS9,RPS11,RPS12,RPS14,RPS15,RPS16,RPS18,RPS21,RPS24,RPS28,RPS29,FAU,EIF3C,EIF3G,EIF3H,EIF3I,EIF3K,EIF3CL
Pathway	M13486	Huntington's disease	3.5e-17	6.01e-14	1.768e-15	1.419e-14	34	180	UQCRHL,CREB3,SLC25A4,SLC25A5,SLC25A6,ATP5F1A,SOD1,ATP5F1B,ATP5MC2,ATP5PO,NDUFA8,NDUFB2,NDUFB7,NDUFB8,NDUFB9,NDUFB10,NDUFS3,NDUFV1,NDUFS5,NDUFS8,NDUFV3,GPX1,AP2M1,AP2S1,CLTA,UQCRC1,UQCRH,COX4I1,POLR2F,COX6B1,POLR2H,POLR2I,POLR2L,NDUFS7
Pathway	83100	Huntington's disease	4.523e-17	7.766e-14	2.219e-15	1.781e-14	35	193	UQCRHL,CREB3,SLC25A4,SLC25A5,SLC25A6,ATP5F1A,SOD1,ATP5F1B,ATP5MC2,ATP5PO,NDUFA8,NDUFB2,NDUFB7,NDUFB8,NDUFB9,NDUFB10,NDUFS3,NDUFV1,NDUFS5,NDUFS8,NDUFV3,GPX1,AP2M1,AP2S1,CLTA,UQCRC1,UQCRH,NDUFB11,COX4I1,POLR2F,COX6B1,POLR2H,POLR2I,POLR2L,NDUFS7
Pathway	M7272	Parkinson's disease	4.704e-17	8.078e-14	2.244e-15	1.801e-14	29	128	UQCRHL,SLC25A4,SLC25A5,SLC25A6,ATP5F1A,ATP5F1B,ATP5MC2,ATP5PO,NDUFA8,NDUFB2,NDUFB7,NDUFB8,NDUFB9,NDUFB10,NDUFS3,NDUFV1,NDUFS5,NDUFS8,NDUFV3,HTRA2,UBE2L6,PARK7,UBB,UCHL1,UQCRC1,UQCRH,COX4I1,COX6B1,NDUFS7
Pathway	83098	Parkinson's disease	1.061e-16	1.821e-13	4.922e-15	3.95e-14	30	142	UQCRHL,SLC25A4,SLC25A5,SLC25A6,ATP5F1A,ATP5F1B,ATP5MC2,ATP5PO,NDUFA8,NDUFB2,NDUFB7,NDUFB8,NDUFB9,NDUFB10,NDUFS3,NDUFV1,NDUFS5,NDUFS8,NDUFV3,HTRA2,UBE2L6,PARK7,UBB,UCHL1,UQCRC1,UQCRH,NDUFB11,COX4I1,COX6B1,NDUFS7
Pathway	82942	Oxidative phosphorylation	1.076e-14	1.848e-11	4.864e-13	3.903e-12	27	133	UQCRHL,ATP5F1A,ATP5F1B,ATP5MC2,ATP5ME,ATP6V0B,ATP6AP1,ATP5PO,NDUFA8,NDUFB2,NDUFB7,NDUFB8,NDUFB9,NDUFB10,NDUFS3,NDUFV1,NDUFS5,NDUFS8,NDUFV3,ATP6V0D1,UQCRC1,UQCRH,NDUFB11,COX4I1,COX6B1,ATP5MF,NDUFS7
Pathway	1270121	The citric acid (TCA) cycle and respiratory electron transport	2.164e-14	3.715e-11	9.527e-13	7.646e-12	30	171	MDH2,ECSIT,ATP5F1A,ATP5F1B,ATP5MC2,ATP5ME,ATP5PO,NDUFA8,NDUFB2,NDUFB7,NDUFB8,NDUFB9,NDUFB10,NDUFS3,NDUFV1,NDUFS5,NDUFS8,NDUFV3,BSG,HAGH,UQCRC1,UQCRH,NDUFB11,COX4I1,NDUFAF3,COX6B1,ATP5MF,IDH3B,IDH3G,NDUFS7
Pathway	M19540	Oxidative phosphorylation	5.982e-14	1.027e-10	2.568e-12	2.061e-11	26	131	UQCRHL,ATP5F1A,ATP5F1B,ATP5MC2,ATP5ME,ATP6V0B,ATP6AP1,ATP5PO,NDUFA8,NDUFB2,NDUFB7,NDUFB8,NDUFB9,NDUFB10,NDUFS3,NDUFV1,NDUFS5,NDUFS8,NDUFV3,ATP6V0D1,UQCRC1,UQCRH,COX4I1,COX6B1,ATP5MF,NDUFS7
Pathway	1270127	Respiratory electron transport, ATP synthesis by chemiosmotic coupling, and heat production by uncoupling proteins.	1.857e-13	3.188e-10	7.777e-12	6.242e-11	25	126	ECSIT,ATP5F1A,ATP5F1B,ATP5MC2,ATP5ME,ATP5PO,NDUFA8,NDUFB2,NDUFB7,NDUFB8,NDUFB9,NDUFB10,NDUFS3,NDUFV1,NDUFS5,NDUFS8,NDUFV3,UQCRC1,UQCRH,NDUFB11,COX4I1,NDUFAF3,COX6B1,ATP5MF,NDUFS7
Pathway	1269791	Ubiquitin-dependent degradation of Cyclin D	4.707e-13	8.082e-10	1.879e-11	1.508e-10	17	54	CDK4,UBA52,UBB,UBC,PSMA7,PSMB2,PSMB3,PSMB6,PSMB7,PSMC3,PSMC4,PSMC5,PSMD3,PSMD7,PSMD8,PSMD11,SEM1
Pathway	1269792	Ubiquitin-dependent degradation of Cyclin D1	4.707e-13	8.082e-10	1.879e-11	1.508e-10	17	54	CDK4,UBA52,UBB,UBC,PSMA7,PSMB2,PSMB3,PSMB6,PSMB7,PSMC3,PSMC4,PSMC5,PSMD3,PSMD7,PSMD8,PSMD11,SEM1
Pathway	1269098	Vif-mediated degradation of APOBEC3G	1.276e-12	2.191e-09	4.979e-11	3.996e-10	17	57	ELOB,UBA52,UBB,UBC,PSMA7,PSMB2,PSMB3,PSMB6,PSMB7,PSMC3,PSMC4,PSMC5,PSMD3,PSMD7,PSMD8,PSMD11,SEM1
Pathway	1268844	Mitochondrial translation elongation	4.457e-12	7.652e-09	1.7e-10	1.365e-09	20	89	MRPS12,MRPL51,MRPL27,MRPL28,GADD45GIP1,TUFM,MRPL55,MRPL14,MRPS26,MRPS11,MRPL41,MRPL40,ERAL1,MRPL20,MRPL54,MRPL52,MRPL2,MRPS18A,MRPL4,MRPS2
Pathway	1270296	Regulation of activated PAK-2p34 by proteasome mediated degradation	4.803e-12	8.246e-09	1.793e-10	1.439e-09	16	53	UBA52,UBB,UBC,PSMA7,PSMB2,PSMB3,PSMB6,PSMB7,PSMC3,PSMC4,PSMC5,PSMD3,PSMD7,PSMD8,PSMD11,SEM1
Pathway	1269783	CDK-mediated phosphorylation and removal of Cdc6	6.627e-12	1.138e-08	2.421e-10	1.943e-09	16	54	UBA52,UBB,UBC,PSMA7,PSMB2,PSMB3,PSMB6,PSMB7,PSMC3,PSMC4,PSMC5,PSMD3,PSMD7,PSMD8,PSMD11,SEM1
Pathway	1269057	HIV Infection	7.038e-12	1.208e-08	2.518e-10	2.021e-09	32	240	SLC25A4,SLC25A5,SLC25A6,NELFCD,CHMP2A,BANF1,AP1M1,ELOB,UBA52,UBB,UBC,AP2M1,AP2S1,POLR2F,POLR2H,POLR2I,POLR2L,PSMA7,PSMB2,PSMB3,PSMB6,PSMB7,PSMC3,PSMC4,PSMC5,PSMD3,PSMD7,PSMD8,PSMD11,CHMP6,SEM1,VPS28
Pathway	1269770	SCF(Skp2)-mediated degradation of p27/p21	7.753e-12	1.331e-08	2.717e-10	2.18e-09	17	63	CDK4,UBA52,UBB,UBC,PSMA7,PSMB2,PSMB3,PSMB6,PSMB7,PSMC3,PSMC4,PSMC5,PSMD3,PSMD7,PSMD8,PSMD11,SEM1
Pathway	1269091	Host Interactions of HIV factors	8.139e-12	1.398e-08	2.795e-10	2.243e-09	24	136	SLC25A4,SLC25A5,SLC25A6,BANF1,AP1M1,ELOB,UBA52,UBB,UBC,AP2M1,AP2S1,PSMA7,PSMB2,PSMB3,PSMB6,PSMB7,PSMC3,PSMC4,PSMC5,PSMD3,PSMD7,PSMD8,PSMD11,SEM1
Pathway	1269107	Vpu mediated degradation of CD4	9.074e-12	1.558e-08	2.996e-10	2.405e-09	16	55	UBA52,UBB,UBC,PSMA7,PSMB2,PSMB3,PSMB6,PSMB7,PSMC3,PSMC4,PSMC5,PSMD3,PSMD7,PSMD8,PSMD11,SEM1
Pathway	1269747	Autodegradation of the E3 ubiquitin ligase COP1	9.074e-12	1.558e-08	2.996e-10	2.405e-09	16	55	UBA52,UBB,UBC,PSMA7,PSMB2,PSMB3,PSMB6,PSMB7,PSMC3,PSMC4,PSMC5,PSMD3,PSMD7,PSMD8,PSMD11,SEM1
Pathway	1269778	Cyclin A:Cdk2-associated events at S phase entry	9.932e-12	1.705e-08	3.218e-10	2.582e-09	18	73	CDC25B,CDK4,UBA52,UBB,UBC,PSMA7,PSMB2,PSMB3,PSMB6,PSMB7,PSMC3,PSMC4,PSMC5,PSMD3,PSMD7,PSMD8,PSMD11,SEM1
Pathway	1270295	Regulation of Apoptosis	1.233e-11	2.118e-08	3.716e-10	2.982e-09	16	56	UBA52,UBB,UBC,PSMA7,PSMB2,PSMB3,PSMB6,PSMB7,PSMC3,PSMC4,PSMC5,PSMD3,PSMD7,PSMD8,PSMD11,SEM1
Pathway	1269752	Ubiquitin Mediated Degradation of Phosphorylated Cdc25A	1.233e-11	2.118e-08	3.716e-10	2.982e-09	16	56	UBA52,UBB,UBC,PSMA7,PSMB2,PSMB3,PSMB6,PSMB7,PSMC3,PSMC4,PSMC5,PSMD3,PSMD7,PSMD8,PSMD11,SEM1
Pathway	1269750	p53-Independent G1/S DNA damage checkpoint	1.233e-11	2.118e-08	3.716e-10	2.982e-09	16	56	UBA52,UBB,UBC,PSMA7,PSMB2,PSMB3,PSMB6,PSMB7,PSMC3,PSMC4,PSMC5,PSMD3,PSMD7,PSMD8,PSMD11,SEM1
Pathway	1269751	p53-Independent DNA Damage Response	1.233e-11	2.118e-08	3.716e-10	2.982e-09	16	56	UBA52,UBB,UBC,PSMA7,PSMB2,PSMB3,PSMB6,PSMB7,PSMC3,PSMC4,PSMC5,PSMD3,PSMD7,PSMD8,PSMD11,SEM1
Pathway	1268842	Mitochondrial translation	1.611e-11	2.766e-08	4.769e-10	3.828e-09	20	95	MRPS12,MRPL51,MRPL27,MRPL28,GADD45GIP1,TUFM,MRPL55,MRPL14,MRPS26,MRPS11,MRPL41,MRPL40,ERAL1,MRPL20,MRPL54,MRPL52,MRPL2,MRPS18A,MRPL4,MRPS2
Pathway	1269852	Autodegradation of Cdh1 by Cdh1:APC/C	1.763e-11	3.026e-08	5.129e-10	4.117e-09	17	66	ANAPC11,UBA52,UBB,UBC,PSMA7,PSMB2,PSMB3,PSMB6,PSMB7,PSMC3,PSMC4,PSMC5,PSMD3,PSMD7,PSMD8,PSMD11,SEM1
Pathway	1427861	UCH proteinases	2.061e-11	3.538e-08	5.897e-10	4.733e-09	21	107	ACTB,MCRS1,RUVBL1,ADRM1,UBA52,UBB,UBC,UCHL1,PSMA7,PSMB2,PSMB3,PSMB6,PSMB7,PSMC3,PSMC4,PSMC5,PSMD3,PSMD7,PSMD8,PSMD11,SEM1
Pathway	1269606	Degradation of AXIN	2.233e-11	3.833e-08	5.99e-10	4.807e-09	16	58	UBA52,UBB,UBC,PSMA7,PSMB2,PSMB3,PSMB6,PSMB7,PSMC3,PSMC4,PSMC5,PSMD3,PSMD7,PSMD8,PSMD11,SEM1
Pathway	1269746	Stabilization of p53	2.233e-11	3.833e-08	5.99e-10	4.807e-09	16	58	UBA52,UBB,UBC,PSMA7,PSMB2,PSMB3,PSMB6,PSMB7,PSMC3,PSMC4,PSMC5,PSMD3,PSMD7,PSMD8,PSMD11,SEM1
Pathway	1457807	FBXL7 down-regulates AURKA during mitotic entry and in early mitosis	2.233e-11	3.833e-08	5.99e-10	4.807e-09	16	58	UBA52,UBB,UBC,PSMA7,PSMB2,PSMB3,PSMB6,PSMB7,PSMC3,PSMC4,PSMC5,PSMD3,PSMD7,PSMD8,PSMD11,SEM1
Pathway	1269841	SCF-beta-TrCP mediated degradation of Emi1	2.233e-11	3.833e-08	5.99e-10	4.807e-09	16	58	UBA52,UBB,UBC,PSMA7,PSMB2,PSMB3,PSMB6,PSMB7,PSMC3,PSMC4,PSMC5,PSMD3,PSMD7,PSMD8,PSMD11,SEM1
Pathway	1269726	AUF1 (hnRNP D0) binds and destabilizes mRNA	2.974e-11	5.107e-08	7.857e-10	6.306e-09	16	59	UBA52,UBB,UBC,PSMA7,PSMB2,PSMB3,PSMB6,PSMB7,PSMC3,PSMC4,PSMC5,PSMD3,PSMD7,PSMD8,PSMD11,SEM1
Pathway	1268843	Mitochondrial translation initiation	3.268e-11	5.611e-08	8.375e-10	6.722e-09	19	88	MRPS12,MRPL51,MRPL27,MRPL28,GADD45GIP1,MRPL55,MRPL14,MRPS26,MRPS11,MRPL41,MRPL40,ERAL1,MRPL20,MRPL54,MRPL52,MRPL2,MRPS18A,MRPL4,MRPS2
Pathway	1268845	Mitochondrial translation termination	3.268e-11	5.611e-08	8.375e-10	6.722e-09	19	88	MRPS12,MRPL51,MRPL27,MRPL28,GADD45GIP1,MRPL55,MRPL14,MRPS26,MRPS11,MRPL41,MRPL40,ERAL1,MRPL20,MRPL54,MRPL52,MRPL2,MRPS18A,MRPL4,MRPS2
Pathway	1270418	Oxygen-dependent proline hydroxylation of Hypoxia-inducible Factor Alpha	3.825e-11	6.567e-08	9.658e-10	7.751e-09	17	69	ELOB,UBA52,UBB,UBC,PSMA7,PSMB2,PSMB3,PSMB6,PSMB7,PSMC3,PSMC4,PSMC5,PSMD3,PSMD7,PSMD8,PSMD11,SEM1
Pathway	1268928	Hh mutants that don't undergo autocatalytic processing are degraded by ERAD	3.938e-11	6.762e-08	9.8e-10	7.865e-09	16	60	UBA52,UBB,UBC,PSMA7,PSMB2,PSMB3,PSMB6,PSMB7,PSMC3,PSMC4,PSMC5,PSMD3,PSMD7,PSMD8,PSMD11,SEM1
Pathway	PW:0000034	oxidative phosphorylation	4.69e-11	8.053e-08	1.15e-09	9.233e-09	15	52	ATP5F1A,ATP5MC2,ATP6AP1,NDUFA8,NDUFB2,NDUFB7,NDUFB8,NDUFB9,NDUFB10,NDUFS3,NDUFS5,NDUFS8,ATP6V0D1,UQCRH,COX4I1
Pathway	1269186	Activation of NF-kappaB in B cells	4.905e-11	8.421e-08	1.17e-09	9.387e-09	17	70	NFKBIB,UBA52,UBB,UBC,PSMA7,PSMB2,PSMB3,PSMB6,PSMB7,PSMC3,PSMC4,PSMC5,PSMD3,PSMD7,PSMD8,PSMD11,SEM1
Pathway	1269849	APC/C:Cdc20 mediated degradation of Securin	4.905e-11	8.421e-08	1.17e-09	9.387e-09	17	70	ANAPC11,UBA52,UBB,UBC,PSMA7,PSMB2,PSMB3,PSMB6,PSMB7,PSMC3,PSMC4,PSMC5,PSMD3,PSMD7,PSMD8,PSMD11,SEM1
Pathway	1269605	Degradation of DVL	5.184e-11	8.9e-08	1.219e-09	9.785e-09	16	61	UBA52,UBB,UBC,PSMA7,PSMB2,PSMB3,PSMB6,PSMB7,PSMC3,PSMC4,PSMC5,PSMD3,PSMD7,PSMD8,PSMD11,SEM1
Pathway	83040	Proteasome	6.725e-11	1.155e-07	1.513e-09	1.214e-08	14	45	ADRM1,PSMA7,PSMB2,PSMB3,PSMB6,PSMB7,PSMC3,PSMC4,PSMC5,PSMD3,PSMD7,PSMD8,PSMD11,SEM1
Pathway	1269331	NIK-->noncanonical NF-kB signaling	6.784e-11	1.165e-07	1.513e-09	1.214e-08	16	62	UBA52,UBB,UBC,PSMA7,PSMB2,PSMB3,PSMB6,PSMB7,PSMC3,PSMC4,PSMC5,PSMD3,PSMD7,PSMD8,PSMD11,SEM1
Pathway	1268927	Hh mutants abrogate ligand secretion	6.784e-11	1.165e-07	1.513e-09	1.214e-08	16	62	UBA52,UBB,UBC,PSMA7,PSMB2,PSMB3,PSMB6,PSMB7,PSMC3,PSMC4,PSMC5,PSMD3,PSMD7,PSMD8,PSMD11,SEM1
Pathway	1269836	CDT1 association with the CDC6:ORC:origin complex	6.784e-11	1.165e-07	1.513e-09	1.214e-08	16	62	UBA52,UBB,UBC,PSMA7,PSMB2,PSMB3,PSMB6,PSMB7,PSMC3,PSMC4,PSMC5,PSMD3,PSMD7,PSMD8,PSMD11,SEM1
Pathway	1269637	GLI3 is processed to GLI3R by the proteasome	8.829e-11	1.516e-07	1.872e-09	1.502e-08	16	63	UBA52,UBB,UBC,PSMA7,PSMB2,PSMB3,PSMB6,PSMB7,PSMC3,PSMC4,PSMC5,PSMD3,PSMD7,PSMD8,PSMD11,SEM1
Pathway	1269638	Degradation of GLI2 by the proteasome	8.829e-11	1.516e-07	1.872e-09	1.502e-08	16	63	UBA52,UBB,UBC,PSMA7,PSMB2,PSMB3,PSMB6,PSMB7,PSMC3,PSMC4,PSMC5,PSMD3,PSMD7,PSMD8,PSMD11,SEM1
Pathway	1269306	Dectin-1 mediated noncanonical NF-kB signaling	8.829e-11	1.516e-07	1.872e-09	1.502e-08	16	63	UBA52,UBB,UBC,PSMA7,PSMB2,PSMB3,PSMB6,PSMB7,PSMC3,PSMC4,PSMC5,PSMD3,PSMD7,PSMD8,PSMD11,SEM1
Pathway	1383017	The role of GTSE1 in G2/M progression after G2 checkpoint	8.829e-11	1.516e-07	1.872e-09	1.502e-08	16	63	UBA52,UBB,UBC,PSMA7,PSMB2,PSMB3,PSMB6,PSMB7,PSMC3,PSMC4,PSMC5,PSMD3,PSMD7,PSMD8,PSMD11,SEM1
Pathway	1269725	Regulation of mRNA stability by proteins that bind AU-rich elements	9.096e-11	1.562e-07	1.905e-09	1.529e-08	19	93	EXOSC7,UBA52,UBB,UBC,EXOSC4,PSMA7,PSMB2,PSMB3,PSMB6,PSMB7,PSMC3,PSMC4,PSMC5,PSMD3,PSMD7,PSMD8,EXOSC5,PSMD11,SEM1
Pathway	1269639	Degradation of GLI1 by the proteasome	1.143e-10	1.963e-07	2.336e-09	1.875e-08	16	64	UBA52,UBB,UBC,PSMA7,PSMB2,PSMB3,PSMB6,PSMB7,PSMC3,PSMC4,PSMC5,PSMD3,PSMD7,PSMD8,PSMD11,SEM1
Pathway	1268934	Defective CFTR causes cystic fibrosis	1.143e-10	1.963e-07	2.336e-09	1.875e-08	16	64	UBA52,UBB,UBC,PSMA7,PSMB2,PSMB3,PSMB6,PSMB7,PSMC3,PSMC4,PSMC5,PSMD3,PSMD7,PSMD8,PSMD11,SEM1
Pathway	1269769	Cyclin E associated events during G1/S transition	1.27e-10	2.18e-07	2.565e-09	2.058e-08	17	74	CDK4,UBA52,UBB,UBC,PSMA7,PSMB2,PSMB3,PSMB6,PSMB7,PSMC3,PSMC4,PSMC5,PSMD3,PSMD7,PSMD8,PSMD11,SEM1
Pathway	1269851	APC/C:Cdh1 mediated degradation of Cdc20 and other APC/C:Cdh1 targeted proteins in late mitosis/early G1	1.594e-10	2.737e-07	3.146e-09	2.525e-08	17	75	ANAPC11,UBA52,UBB,UBC,PSMA7,PSMB2,PSMB3,PSMB6,PSMB7,PSMC3,PSMC4,PSMC5,PSMD3,PSMD7,PSMD8,PSMD11,SEM1
Pathway	1269846	Cdc20:Phospho-APC/C mediated degradation of Cyclin A	1.594e-10	2.737e-07	3.146e-09	2.525e-08	17	75	ANAPC11,UBA52,UBB,UBC,PSMA7,PSMB2,PSMB3,PSMB6,PSMB7,PSMC3,PSMC4,PSMC5,PSMD3,PSMD7,PSMD8,PSMD11,SEM1
Pathway	1339146	Complex I biogenesis	1.993e-10	3.422e-07	3.847e-09	3.087e-08	15	57	ECSIT,NDUFA8,NDUFB2,NDUFB7,NDUFB8,NDUFB9,NDUFB10,NDUFS3,NDUFV1,NDUFS5,NDUFS8,NDUFV3,NDUFB11,NDUFAF3,NDUFS7
Pathway	1269845	APC:Cdc20 mediated degradation of cell cycle proteins prior to satisfation of the cell cycle checkpoint	1.994e-10	3.423e-07	3.847e-09	3.087e-08	17	76	ANAPC11,UBA52,UBB,UBC,PSMA7,PSMB2,PSMB3,PSMB6,PSMB7,PSMC3,PSMC4,PSMC5,PSMD3,PSMD7,PSMD8,PSMD11,SEM1
Pathway	1269611	PCP/CE pathway	2.364e-10	4.06e-07	4.492e-09	3.606e-08	19	98	UBA52,UBB,UBC,AP2M1,AP2S1,CLTA,PSMA7,PSMB2,PSMB3,PSMB6,PSMB7,PSMC3,PSMC4,PSMC5,PSMD3,PSMD7,PSMD8,PSMD11,SEM1
Pathway	1269744	p53-Dependent G1/S DNA damage checkpoint	2.407e-10	4.133e-07	4.492e-09	3.606e-08	16	67	UBA52,UBB,UBC,PSMA7,PSMB2,PSMB3,PSMB6,PSMB7,PSMC3,PSMC4,PSMC5,PSMD3,PSMD7,PSMD8,PSMD11,SEM1
Pathway	1269745	p53-Dependent G1 DNA Damage Response	2.407e-10	4.133e-07	4.492e-09	3.606e-08	16	67	UBA52,UBB,UBC,PSMA7,PSMB2,PSMB3,PSMB6,PSMB7,PSMC3,PSMC4,PSMC5,PSMD3,PSMD7,PSMD8,PSMD11,SEM1
Pathway	1269844	APC/C:Cdc20 mediated degradation of mitotic proteins	3.084e-10	5.296e-07	5.695e-09	4.57e-08	17	78	ANAPC11,UBA52,UBB,UBC,PSMA7,PSMB2,PSMB3,PSMB6,PSMB7,PSMC3,PSMC4,PSMC5,PSMD3,PSMD7,PSMD8,PSMD11,SEM1
Pathway	1269842	Activation of APC/C and APC/C:Cdc20 mediated degradation of mitotic proteins	3.816e-10	6.552e-07	6.701e-09	5.378e-08	17	79	ANAPC11,UBA52,UBB,UBC,PSMA7,PSMB2,PSMB3,PSMB6,PSMB7,PSMC3,PSMC4,PSMC5,PSMD3,PSMD7,PSMD8,PSMD11,SEM1
Pathway	1270415	Cellular response to hypoxia	3.816e-10	6.552e-07	6.701e-09	5.378e-08	17	79	ELOB,UBA52,UBB,UBC,PSMA7,PSMB2,PSMB3,PSMB6,PSMB7,PSMC3,PSMC4,PSMC5,PSMD3,PSMD7,PSMD8,PSMD11,SEM1
Pathway	1270416	Regulation of Hypoxia-inducible Factor (HIF) by oxygen	3.816e-10	6.552e-07	6.701e-09	5.378e-08	17	79	ELOB,UBA52,UBB,UBC,PSMA7,PSMB2,PSMB3,PSMB6,PSMB7,PSMC3,PSMC4,PSMC5,PSMD3,PSMD7,PSMD8,PSMD11,SEM1
Pathway	1269634	Hedgehog ligand biogenesis	3.864e-10	6.634e-07	6.701e-09	5.378e-08	16	69	UBA52,UBB,UBC,PSMA7,PSMB2,PSMB3,PSMB6,PSMB7,PSMC3,PSMC4,PSMC5,PSMD3,PSMD7,PSMD8,PSMD11,SEM1
Pathway	1269612	Asymmetric localization of PCP proteins	3.864e-10	6.634e-07	6.701e-09	5.378e-08	16	69	UBA52,UBB,UBC,PSMA7,PSMB2,PSMB3,PSMB6,PSMB7,PSMC3,PSMC4,PSMC5,PSMD3,PSMD7,PSMD8,PSMD11,SEM1
Pathway	1269743	G1/S DNA Damage Checkpoints	3.864e-10	6.634e-07	6.701e-09	5.378e-08	16	69	UBA52,UBB,UBC,PSMA7,PSMB2,PSMB3,PSMB6,PSMB7,PSMC3,PSMC4,PSMC5,PSMD3,PSMD7,PSMD8,PSMD11,SEM1
Pathway	1270128	Respiratory electron transport	5.784e-10	9.931e-07	9.931e-09	7.971e-08	19	103	ECSIT,NDUFA8,NDUFB2,NDUFB7,NDUFB8,NDUFB9,NDUFB10,NDUFS3,NDUFV1,NDUFS5,NDUFS8,NDUFV3,UQCRC1,UQCRH,NDUFB11,COX4I1,NDUFAF3,COX6B1,NDUFS7
Pathway	1268933	ABC transporter disorders	6.096e-10	1.047e-06	1.026e-08	8.235e-08	16	71	UBA52,UBB,UBC,PSMA7,PSMB2,PSMB3,PSMB6,PSMB7,PSMC3,PSMC4,PSMC5,PSMD3,PSMD7,PSMD8,PSMD11,SEM1
Pathway	1269833	Assembly of the pre-replicative complex	6.096e-10	1.047e-06	1.026e-08	8.235e-08	16	71	UBA52,UBB,UBC,PSMA7,PSMB2,PSMB3,PSMB6,PSMB7,PSMC3,PSMC4,PSMC5,PSMD3,PSMD7,PSMD8,PSMD11,SEM1
Pathway	1269839	Regulation of APC/C activators between G1/S and early anaphase	8.647e-10	1.485e-06	1.441e-08	1.157e-07	17	83	ANAPC11,UBA52,UBB,UBC,PSMA7,PSMB2,PSMB3,PSMB6,PSMB7,PSMC3,PSMC4,PSMC5,PSMD3,PSMD7,PSMD8,PSMD11,SEM1
Pathway	1269290	Regulation of RAS by GAPs	9.463e-10	1.625e-06	1.562e-08	1.254e-07	16	73	UBA52,UBB,UBC,PSMA7,PSMB2,PSMB3,PSMB6,PSMB7,PSMC3,PSMC4,PSMC5,PSMD3,PSMD7,PSMD8,PSMD11,SEM1
Pathway	1270174	Regulation of ornithine decarboxylase (ODC)	1.004e-09	1.725e-06	1.642e-08	1.318e-07	14	54	OAZ1,PSMA7,PSMB2,PSMB3,PSMB6,PSMB7,PSMC3,PSMC4,PSMC5,PSMD3,PSMD7,PSMD8,PSMD11,SEM1
Pathway	83097	Alzheimer's disease	1.121e-09	1.925e-06	1.816e-08	1.457e-07	24	171	UQCRHL,ATP5F1A,ATP5F1B,ATP5MC2,ATP5PO,GAPDH,NDUFA8,NDUFB2,NDUFB7,NDUFB8,NDUFB9,NDUFB10,NDUFS3,NDUFV1,NDUFS5,NDUFS8,NDUFV3,HSD17B10,UQCRC1,UQCRH,NDUFB11,COX4I1,COX6B1,NDUFS7
Pathway	1269781	Switching of origins to a post-replicative state	1.172e-09	2.013e-06	1.864e-08	1.496e-07	16	74	UBA52,UBB,UBC,PSMA7,PSMB2,PSMB3,PSMB6,PSMB7,PSMC3,PSMC4,PSMC5,PSMD3,PSMD7,PSMD8,PSMD11,SEM1
Pathway	1269782	Orc1 removal from chromatin	1.172e-09	2.013e-06	1.864e-08	1.496e-07	16	74	UBA52,UBB,UBC,PSMA7,PSMB2,PSMB3,PSMB6,PSMB7,PSMC3,PSMC4,PSMC5,PSMD3,PSMD7,PSMD8,PSMD11,SEM1
Pathway	M10680	Proteasome	1.246e-09	2.14e-06	1.963e-08	1.575e-07	13	46	PSMA7,PSMB2,PSMB3,PSMB6,PSMB7,PSMC3,PSMC4,PSMC5,PSMD3,PSMD7,PSMD8,PSMD11,SEM1
Pathway	1269596	Degradation of beta-catenin by the destruction complex	1.278e-09	2.194e-06	1.994e-08	1.601e-07	17	85	UBA52,UBB,UBC,PPP2R1A,PSMA7,PSMB2,PSMB3,PSMB6,PSMB7,PSMC3,PSMC4,PSMC5,PSMD3,PSMD7,PSMD8,PSMD11,SEM1
Pathway	1269796	Removal of licensing factors from origins	1.78e-09	3.056e-06	2.753e-08	2.21e-07	16	76	UBA52,UBB,UBC,PSMA7,PSMB2,PSMB3,PSMB6,PSMB7,PSMC3,PSMC4,PSMC5,PSMD3,PSMD7,PSMD8,PSMD11,SEM1
Pathway	1269831	M/G1 Transition	2.245e-09	3.855e-06	3.412e-08	2.738e-07	17	88	UBA52,UBB,UBC,POLE4,PSMA7,PSMB2,PSMB3,PSMB6,PSMB7,PSMC3,PSMC4,PSMC5,PSMD3,PSMD7,PSMD8,PSMD11,SEM1
Pathway	1269832	DNA Replication Pre-Initiation	2.245e-09	3.855e-06	3.412e-08	2.738e-07	17	88	UBA52,UBB,UBC,POLE4,PSMA7,PSMB2,PSMB3,PSMB6,PSMB7,PSMC3,PSMC4,PSMC5,PSMD3,PSMD7,PSMD8,PSMD11,SEM1
Pathway	1268932	Disorders of transmembrane transporters	2.665e-09	4.575e-06	3.989e-08	3.201e-07	16	78	UBA52,UBB,UBC,PSMA7,PSMB2,PSMB3,PSMB6,PSMB7,PSMC3,PSMC4,PSMC5,PSMD3,PSMD7,PSMD8,PSMD11,SEM1
Pathway	1269837	Regulation of mitotic cell cycle	2.695e-09	4.627e-06	3.989e-08	3.201e-07	17	89	ANAPC11,UBA52,UBB,UBC,PSMA7,PSMB2,PSMB3,PSMB6,PSMB7,PSMC3,PSMC4,PSMC5,PSMD3,PSMD7,PSMD8,PSMD11,SEM1
Pathway	1269838	APC/C-mediated degradation of cell cycle proteins	2.695e-09	4.627e-06	3.989e-08	3.201e-07	17	89	ANAPC11,UBA52,UBB,UBC,PSMA7,PSMB2,PSMB3,PSMB6,PSMB7,PSMC3,PSMC4,PSMC5,PSMD3,PSMD7,PSMD8,PSMD11,SEM1
Pathway	M16024	Alzheimer's disease	2.873e-09	4.933e-06	4.216e-08	3.384e-07	23	165	UQCRHL,ATP5F1A,ATP5F1B,ATP5MC2,ATP5PO,GAPDH,NDUFA8,NDUFB2,NDUFB7,NDUFB8,NDUFB9,NDUFB10,NDUFS3,NDUFV1,NDUFS5,NDUFS8,NDUFV3,HSD17B10,UQCRC1,UQCRH,COX4I1,COX6B1,NDUFS7
Pathway	1269794	Regulation of DNA replication	3.245e-09	5.571e-06	4.721e-08	3.789e-07	16	79	UBA52,UBB,UBC,PSMA7,PSMB2,PSMB3,PSMB6,PSMB7,PSMC3,PSMC4,PSMC5,PSMD3,PSMD7,PSMD8,PSMD11,SEM1
Pathway	1269779	Synthesis of DNA	4.091e-09	7.024e-06	5.902e-08	4.737e-07	18	103	UBA52,UBB,UBC,POLE4,PSMA7,PSMB2,PSMB3,PSMB6,PSMB7,PSMC3,PSMC4,PSMC5,PSMD3,PSMD7,PSMD8,PSMD11,SEM1,RFC2
Pathway	1268745	Mitochondrial protein import	7.118e-09	1.222e-05	1.018e-07	8.174e-07	14	62	SLC25A4,SLC25A6,CHCHD5,TIMM50,ATP5F1A,ATP5F1B,BCS1L,PMPCA,SAMM50,TIMM22,TOMM7,IDH3G,TIMM13,TIMM8B
Pathway	1269777	S Phase	7.342e-09	1.261e-05	1.042e-07	8.361e-07	20	132	CDC25B,CDK4,UBA52,UBB,UBC,POLE4,PSMA7,PSMB2,PSMB3,PSMB6,PSMB7,PSMC3,PSMC4,PSMC5,PSMD3,PSMD7,PSMD8,PSMD11,SEM1,RFC2
Pathway	1269199	Cross-presentation of soluble exogenous antigens (endosomes)	8.396e-09	1.442e-05	1.182e-07	9.484e-07	13	53	PSMA7,PSMB2,PSMB3,PSMB6,PSMB7,PSMC3,PSMC4,PSMC5,PSMD3,PSMD7,PSMD8,PSMD11,SEM1
Pathway	1269768	G1/S Transition	9.578e-09	1.644e-05	1.337e-07	1.073e-06	19	121	CDK4,UBA52,UBB,UBC,POLE4,PPP2R1A,PSMA7,PSMB2,PSMB3,PSMB6,PSMB7,PSMC3,PSMC4,PSMC5,PSMD3,PSMD7,PSMD8,PSMD11,SEM1
Pathway	1269875	DNA Replication	1.401e-08	2.405e-05	1.919e-07	1.54e-06	18	111	UBA52,UBB,UBC,POLE4,PSMA7,PSMB2,PSMB3,PSMB6,PSMB7,PSMC3,PSMC4,PSMC5,PSMD3,PSMD7,PSMD8,PSMD11,SEM1,RFC2
Pathway	1269197	ER-Phagosome pathway	1.408e-08	2.418e-05	1.919e-07	1.54e-06	16	87	UBA52,UBB,UBC,PSMA7,PSMB2,PSMB3,PSMB6,PSMB7,PSMC3,PSMC4,PSMC5,PSMD3,PSMD7,PSMD8,PSMD11,SEM1
Pathway	1269301	FCERI mediated NF-kB activation	1.408e-08	2.418e-05	1.919e-07	1.54e-06	16	87	UBA52,UBB,UBC,PSMA7,PSMB2,PSMB3,PSMB6,PSMB7,PSMC3,PSMC4,PSMC5,PSMD3,PSMD7,PSMD8,PSMD11,SEM1
Pathway	1269640	Hedgehog 'on' state	1.979e-08	3.397e-05	2.675e-07	2.147e-06	16	89	UBA52,UBB,UBC,PSMA7,PSMB2,PSMB3,PSMB6,PSMB7,PSMC3,PSMC4,PSMC5,PSMD3,PSMD7,PSMD8,PSMD11,SEM1
Pathway	1269506	MAPK6/MAPK4 signaling	3.236e-08	5.556e-05	4.341e-07	3.484e-06	16	92	UBA52,UBB,UBC,PSMA7,PSMB2,PSMB3,PSMB6,PSMB7,PSMC3,PSMC4,PSMC5,PSMD3,PSMD7,PSMD8,PSMD11,SEM1
Pathway	132956	Metabolic pathways	5.682e-08	9.756e-05	7.563e-07	6.07e-06	76	1272	RPN1,RPN2,AKR1A1,MDH2,POLR1H,PEMT,AHCY,ALAS1,ALDOC,AKR1B1,UQCRHL,NAGK,APRT,EBP,ATP5F1A,ATP5F1B,ATP5MC2,ATP5ME,ATP6V0B,ATP6AP1,ATP5PO,GAPDH,INPP5K,BCAT2,NDUFA8,NDUFB2,NDUFB7,NDUFB8,NDUFB9,NDUFB10,DPM2,NDUFS3,NDUFV1,NDUFS5,NDUFS8,NDUFV3,BLVRB,NME1,TALDO1,GSS,ATP6V0D1,GUK1,TKT,PAFAH1B3,HSD17B10,TPI1,B4GALT7,HMOX2,PFKM,GRHPR,PGAM4,PKM,UQCRC1,UQCRH,UROD,PMM1,NDUFB11,COX4I1,POLR2F,COX6B1,POLR2H,POLR2I,…
Pathway	1269610	Beta-catenin independent WNT signaling	7.531e-08	0.0001293	9.947e-07	7.983e-06	20	151	GNG3,UBA52,UBB,UBC,AP2M1,AP2S1,CLTA,PSMA7,PSMB2,PSMB3,PSMB6,PSMB7,PSMC3,PSMC4,PSMC5,PSMD3,PSMD7,PSMD8,PSMD11,SEM1
Pathway	1269195	Antigen processing-Cross presentation	1.668e-07	0.0002864	2.153e-06	1.728e-05	16	103	UBA52,UBB,UBC,PSMA7,PSMB2,PSMB3,PSMB6,PSMB7,PSMC3,PSMC4,PSMC5,PSMD3,PSMD7,PSMD8,PSMD11,SEM1
Pathway	1269176	Downstream TCR signaling	1.668e-07	0.0002864	2.153e-06	1.728e-05	16	103	UBA52,UBB,UBC,PSMA7,PSMB2,PSMB3,PSMB6,PSMB7,PSMC3,PSMC4,PSMC5,PSMD3,PSMD7,PSMD8,PSMD11,SEM1
Pathway	1269304	CLEC7A (Dectin-1) signaling	1.668e-07	0.0002864	2.153e-06	1.728e-05	16	103	UBA52,UBB,UBC,PSMA7,PSMB2,PSMB3,PSMB6,PSMB7,PSMC3,PSMC4,PSMC5,PSMD3,PSMD7,PSMD8,PSMD11,SEM1
Pathway	1270414	Cellular responses to stress	1.829e-07	0.000314	2.344e-06	1.881e-05	37	454	LAMTOR2,ANAPC11,DYNLL1,ATOX1,SOD1,CHMP2A,ATG4B,MLST8,ELOB,GPX1,PRDX2,WDR45,PRDX1,CDK4,TXN,UBA52,UBB,UBC,PRDX5,TXN2,RPS19BP1,PSMA7,PSMB2,PSMB3,PSMB6,PSMB7,PSMC3,PSMC4,PSMC5,PSMD3,PSMD7,PSMD8,PSMD11,LAMTOR1,CCS,CHMP6,SEM1
Pathway	1269764	Mitotic G1-G1/S phases	1.901e-07	0.0003264	2.416e-06	1.939e-05	19	145	CDK4,UBA52,UBB,UBC,POLE4,PPP2R1A,PSMA7,PSMB2,PSMB3,PSMB6,PSMB7,PSMC3,PSMC4,PSMC5,PSMD3,PSMD7,PSMD8,PSMD11,SEM1
Pathway	1269636	Hedgehog 'off' state	1.914e-07	0.0003286	2.416e-06	1.939e-05	16	104	UBA52,UBB,UBC,PSMA7,PSMB2,PSMB3,PSMB6,PSMB7,PSMC3,PSMC4,PSMC5,PSMD3,PSMD7,PSMD8,PSMD11,SEM1
Pathway	1269329	TNFR2 non-canonical NF-kB pathway	2.508e-07	0.0004306	3.143e-06	2.522e-05	16	106	UBA52,UBB,UBC,PSMA7,PSMB2,PSMB3,PSMB6,PSMB7,PSMC3,PSMC4,PSMC5,PSMD3,PSMD7,PSMD8,PSMD11,SEM1
Pathway	1309113	DNA Damage Recognition in GG-NER	2.897e-07	0.0004973	3.604e-06	2.892e-05	10	39	ACTB,MCRS1,RUVBL1,COPS6,GPS1,CETN2,UBA52,UBB,UBC,COPS7B
Pathway	862188	Non-alcoholic fatty liver disease (NAFLD)	2.933e-07	0.0005035	3.622e-06	2.907e-05	19	149	UQCRHL,NDUFA8,NDUFB2,NDUFB7,NDUFB8,NDUFB9,NDUFB10,NDUFS3,NDUFV1,NDUFS5,NDUFS8,NDUFV3,MLX,UQCRC1,UQCRH,NDUFB11,COX4I1,COX6B1,NDUFS7
Pathway	1269825	Mitotic Anaphase	3.523e-07	0.0006048	4.32e-06	3.467e-05	21	181	SEC13,CENPT,ANAPC11,BANF1,UBA52,UBB,UBC,PPP2R1A,PSMA7,PSMB2,PSMB3,PSMB6,PSMB7,PSMC3,PSMC4,PSMC5,PSMD3,PSMD7,PSMD8,PSMD11,SEM1
Pathway	1269823	Mitotic Metaphase and Anaphase	3.866e-07	0.0006638	4.708e-06	3.778e-05	21	182	SEC13,CENPT,ANAPC11,BANF1,UBA52,UBB,UBC,PPP2R1A,PSMA7,PSMB2,PSMB3,PSMB6,PSMB7,PSMC3,PSMC4,PSMC5,PSMD3,PSMD7,PSMD8,PSMD11,SEM1
Pathway	1269904	ABC-family proteins mediated transport	4.221e-07	0.0007248	5.104e-06	4.096e-05	16	110	UBA52,UBB,UBC,PSMA7,PSMB2,PSMB3,PSMB6,PSMB7,PSMC3,PSMC4,PSMC5,PSMD3,PSMD7,PSMD8,PSMD11,SEM1
Pathway	1269799	G2/M Transition	4.647e-07	0.0007979	5.58e-06	4.478e-05	21	184	DYNLL1,CDC25B,DCTN3,CETN2,UBA52,UBB,UBC,PPP2R1A,PSMA7,PSMB2,PSMB3,PSMB6,PSMB7,PSMC3,PSMC4,PSMC5,PSMD3,PSMD7,PSMD8,PSMD11,SEM1
Pathway	1269826	Separation of Sister Chromatids	5.361e-07	0.0009204	6.392e-06	5.13e-05	20	170	SEC13,CENPT,ANAPC11,UBA52,UBB,UBC,PPP2R1A,PSMA7,PSMB2,PSMB3,PSMB6,PSMB7,PSMC3,PSMC4,PSMC5,PSMD3,PSMD7,PSMD8,PSMD11,SEM1
Pathway	1309111	Nucleotide Excision Repair	5.426e-07	0.0009316	6.425e-06	5.156e-05	16	112	ACTB,MCRS1,RUVBL1,COPS6,GPS1,CETN2,UBA52,UBB,UBC,COPS7B,POLR2F,POLR2H,POLR2I,POLR2L,POLE4,RFC2
Pathway	1269797	Mitotic G2-G2/M phases	5.57e-07	0.0009564	6.551e-06	5.258e-05	21	186	DYNLL1,CDC25B,DCTN3,CETN2,UBA52,UBB,UBC,PPP2R1A,PSMA7,PSMB2,PSMB3,PSMB6,PSMB7,PSMC3,PSMC4,PSMC5,PSMD3,PSMD7,PSMD8,PSMD11,SEM1
Pathway	1270170	Metabolism of polyamines	8.477e-07	0.001455	9.901e-06	7.946e-05	14	89	OAZ1,PSMA7,PSMB2,PSMB3,PSMB6,PSMB7,PSMC3,PSMC4,PSMC5,PSMD3,PSMD7,PSMD8,PSMD11,SEM1
Pathway	1268838	Organelle biogenesis and maintenance	1.749e-06	0.003003	2.029e-05	0.0001628	29	341	MRPS12,MRPL51,MRPL27,IFT43,ALAS1,MRPL28,GADD45GIP1,CCT5,DYNLL1,ATP5F1B,DCTN3,CETN2,TUFM,IFT22,MRPL55,PPP2R1A,MRPL14,MRPS26,MRPS11,MRPL41,MRPL40,ERAL1,MRPL20,MRPL54,MRPL52,MRPL2,MRPS18A,MRPL4,MRPS2
Pathway	1269895	Endosomal Sorting Complex Required For Transport (ESCRT)	1.873e-06	0.003215	2.158e-05	0.0001732	8	28	VPS25,CHMP2A,SNF8,UBA52,UBB,UBC,CHMP6,VPS28
Pathway	1269172	TCR signaling	2.178e-06	0.00374	2.482e-05	0.0001992	16	124	UBA52,UBB,UBC,PSMA7,PSMB2,PSMB3,PSMB6,PSMB7,PSMC3,PSMC4,PSMC5,PSMD3,PSMD7,PSMD8,PSMD11,SEM1
Pathway	1269428	Signaling by Insulin receptor	2.183e-06	0.003748	2.482e-05	0.0001992	28	326	RPS6,LAMTOR2,WDR83,ATP6V0B,ATP6AP1,MLST8,ATP6V0D1,PEBP1,PHB,UBA52,UBB,UBC,PPP2R1A,PPP5C,PSMA7,PSMB2,PSMB3,PSMB6,PSMB7,PSMC3,PSMC4,PSMC5,PSMD3,PSMD7,PSMD8,PSMD11,LAMTOR1,SEM1
Pathway	1270420	Detoxification of Reactive Oxygen Species	2.379e-06	0.004085	2.688e-05	0.0002157	9	38	ATOX1,SOD1,GPX1,PRDX2,PRDX1,TXN,PRDX5,TXN2,CCS
Pathway	1268696	Prefoldin mediated transfer of substrate to CCT/TriC	2.514e-06	0.004316	2.821e-05	0.0002264	8	29	ACTB,TUBB3,PFDN6,CCT7,CCT5,TUBA1C,PFDN1,PFDN5
Pathway	790012	Biosynthesis of amino acids	4.304e-06	0.00739	4.799e-05	0.0003852	12	75	ALDOC,GAPDH,BCAT2,TALDO1,TKT,TPI1,PFKM,PGAM4,PKM,IDH3B,IDH3G,ENO1
Pathway	907942	superpathway of purine nucleotide salvage	4.695e-06	0.008061	5.201e-05	0.0004174	9	41	ATP5F1EP2,APRT,ATP5F1A,ATP5F1B,ATP5ME,NME1,NME2P1,GUK1,ATP5MF
Pathway	1269691	mRNA Splicing - Minor Pathway	5.943e-06	0.0102	6.541e-05	0.0005249	10	53	LSM2,SNRPD2,ZMAT5,SNU13,POLR2F,POLR2H,POLR2I,POLR2L,SF3B5,SNRNP25
Pathway	1309118	Formation of TC-NER Pre-Incision Complex	7.087e-06	0.01217	7.751e-05	0.000622	10	54	COPS6,GPS1,UBA52,UBB,UBC,COPS7B,POLR2F,POLR2H,POLR2I,POLR2L
Pathway	1309117	Transcription-Coupled Nucleotide Excision Repair (TC-NER)	7.514e-06	0.0129	8.165e-05	0.0006553	12	79	COPS6,GPS1,UBA52,UBB,UBC,COPS7B,POLR2F,POLR2H,POLR2I,POLR2L,POLE4,RFC2
Pathway	1268695	Cooperation of Prefoldin and TriC/CCT in actin and tubulin folding	9.235e-06	0.01586	9.973e-05	0.0008004	8	34	ACTB,TUBB3,PFDN6,CCT7,CCT5,TUBA1C,PFDN1,PFDN5
Pathway	413340	Glycolysis (Embden-Meyerhof pathway), glucose => pyruvate	9.771e-06	0.01678	0.0001049	0.0008416	7	25	ALDOC,GAPDH,TPI1,PFKM,PGAM4,PKM,ENO1
Pathway	1269431	IRS-mediated signalling	1.16e-05	0.01992	0.0001237	0.0009932	25	298	RPS6,LAMTOR2,WDR83,MLST8,PEBP1,PHB,UBA52,UBB,UBC,PPP2R1A,PPP5C,PSMA7,PSMB2,PSMB3,PSMB6,PSMB7,PSMC3,PSMC4,PSMC5,PSMD3,PSMD7,PSMD8,PSMD11,LAMTOR1,SEM1
Pathway	1269633	Signaling by Hedgehog	1.173e-05	0.02015	0.000124	0.0009956	16	141	UBA52,UBB,UBC,PSMA7,PSMB2,PSMB3,PSMB6,PSMB7,PSMC3,PSMC4,PSMC5,PSMD3,PSMD7,PSMD8,PSMD11,SEM1
Pathway	1269485	VEGFR2 mediated cell proliferation	1.178e-05	0.02022	0.000124	0.0009956	23	261	LAMTOR2,WDR83,PEBP1,PHB,UBA52,UBB,UBC,PPP2R1A,PPP5C,PRKCZ,PSMA7,PSMB2,PSMB3,PSMB6,PSMB7,PSMC3,PSMC4,PSMC5,PSMD3,PSMD7,PSMD8,PSMD11,SEM1
Pathway	1270262	Apoptosis	1.236e-05	0.02122	0.0001294	0.001038	18	174	DYNLL1,UBA52,UBB,UBC,PSMA7,PSMB2,PSMB3,PSMB6,PSMB7,PSMC3,PSMC4,PSMC5,PSMD3,PSMD7,PSMD8,PSMD11,SEM1,BCAP31
Pathway	1270350	DNA Repair	1.295e-05	0.02224	0.0001348	0.001082	26	319	ACTB,FANCG,MCRS1,MAD2L2,MPG,APEX1,RUVBL1,CENPX,COPS6,NTHL1,GPS1,UBE2L6,CETN2,UBA52,UBB,UBC,UFD1,COPS7B,POLR2F,POLR2H,POLR2I,POLR2L,POLE4,PPP4C,PPP5C,RFC2
Pathway	1269429	Insulin receptor signalling cascade	1.379e-05	0.02367	0.0001426	0.001144	25	301	RPS6,LAMTOR2,WDR83,MLST8,PEBP1,PHB,UBA52,UBB,UBC,PPP2R1A,PPP5C,PSMA7,PSMB2,PSMB3,PSMB6,PSMB7,PSMC3,PSMC4,PSMC5,PSMD3,PSMD7,PSMD8,PSMD11,LAMTOR1,SEM1
Pathway	SMP00355	Mitochondrial Electron Transport Chain	1.417e-05	0.02434	0.0001449	0.001163	6	18	SLC25A4,ATP5F1A,ATP5F1B,ATP5MC2,GAPDH,UQCRC1
Pathway	1270129	Formation of ATP by chemiosmotic coupling	1.417e-05	0.02434	0.0001449	0.001163	6	18	ATP5F1A,ATP5F1B,ATP5MC2,ATP5ME,ATP5PO,ATP5MF
Pathway	1269620	IRS-related events triggered by IGF1R	1.459e-05	0.02505	0.0001474	0.001183	25	302	RPS6,LAMTOR2,WDR83,MLST8,PEBP1,PHB,UBA52,UBB,UBC,PPP2R1A,PPP5C,PSMA7,PSMB2,PSMB3,PSMB6,PSMB7,PSMC3,PSMC4,PSMC5,PSMD3,PSMD7,PSMD8,PSMD11,LAMTOR1,SEM1
Pathway	1269618	IGF1R signaling cascade	1.459e-05	0.02505	0.0001474	0.001183	25	302	RPS6,LAMTOR2,WDR83,MLST8,PEBP1,PHB,UBA52,UBB,UBC,PPP2R1A,PPP5C,PSMA7,PSMB2,PSMB3,PSMB6,PSMB7,PSMC3,PSMC4,PSMC5,PSMD3,PSMD7,PSMD8,PSMD11,LAMTOR1,SEM1
Pathway	1269617	Signaling by Type 1 Insulin-like Growth Factor 1 Receptor (IGF1R)	1.544e-05	0.02651	0.000155	0.001244	25	303	RPS6,LAMTOR2,WDR83,MLST8,PEBP1,PHB,UBA52,UBB,UBC,PPP2R1A,PPP5C,PSMA7,PSMB2,PSMB3,PSMB6,PSMB7,PSMC3,PSMC4,PSMC5,PSMD3,PSMD7,PSMD8,PSMD11,LAMTOR1,SEM1
Pathway	1270261	Programmed Cell Death	1.564e-05	0.02685	0.0001561	0.001253	18	177	DYNLL1,UBA52,UBB,UBC,PSMA7,PSMB2,PSMB3,PSMB6,PSMB7,PSMC3,PSMC4,PSMC5,PSMD3,PSMD7,PSMD8,PSMD11,SEM1,BCAP31
Pathway	1309112	Global Genome Nucleotide Excision Repair (GG-NER)	1.623e-05	0.02786	0.0001594	0.00128	12	85	ACTB,MCRS1,RUVBL1,COPS6,GPS1,CETN2,UBA52,UBB,UBC,COPS7B,POLE4,RFC2
Pathway	1269285	RAF/MAP kinase cascade	1.643e-05	0.02822	0.0001594	0.00128	22	248	LAMTOR2,WDR83,PEBP1,PHB,UBA52,UBB,UBC,PPP2R1A,PPP5C,PSMA7,PSMB2,PSMB3,PSMB6,PSMB7,PSMC3,PSMC4,PSMC5,PSMD3,PSMD7,PSMD8,PSMD11,SEM1
Pathway	1269382	GRB2 events in EGFR signaling	1.643e-05	0.02822	0.0001594	0.00128	22	248	LAMTOR2,WDR83,PEBP1,PHB,UBA52,UBB,UBC,PPP2R1A,PPP5C,PSMA7,PSMB2,PSMB3,PSMB6,PSMB7,PSMC3,PSMC4,PSMC5,PSMD3,PSMD7,PSMD8,PSMD11,SEM1
Pathway	1269383	SHC1 events in EGFR signaling	1.643e-05	0.02822	0.0001594	0.00128	22	248	LAMTOR2,WDR83,PEBP1,PHB,UBA52,UBB,UBC,PPP2R1A,PPP5C,PSMA7,PSMB2,PSMB3,PSMB6,PSMB7,PSMC3,PSMC4,PSMC5,PSMD3,PSMD7,PSMD8,PSMD11,SEM1
Pathway	1269440	SOS-mediated signalling	1.643e-05	0.02822	0.0001594	0.00128	22	248	LAMTOR2,WDR83,PEBP1,PHB,UBA52,UBB,UBC,PPP2R1A,PPP5C,PSMA7,PSMB2,PSMB3,PSMB6,PSMB7,PSMC3,PSMC4,PSMC5,PSMD3,PSMD7,PSMD8,PSMD11,SEM1
Pathway	1269303	C-type lectin receptors (CLRs)	1.99e-05	0.03417	0.000192	0.001541	16	147	UBA52,UBB,UBC,PSMA7,PSMB2,PSMB3,PSMB6,PSMB7,PSMC3,PSMC4,PSMC5,PSMD3,PSMD7,PSMD8,PSMD11,SEM1
Pathway	1269471	ARMS-mediated activation	2.109e-05	0.03622	0.0002012	0.001615	22	252	LAMTOR2,WDR83,PEBP1,PHB,UBA52,UBB,UBC,PPP2R1A,PPP5C,PSMA7,PSMB2,PSMB3,PSMB6,PSMB7,PSMC3,PSMC4,PSMC5,PSMD3,PSMD7,PSMD8,PSMD11,SEM1
Pathway	1269468	Signalling to p38 via RIT and RIN	2.109e-05	0.03622	0.0002012	0.001615	22	252	LAMTOR2,WDR83,PEBP1,PHB,UBA52,UBB,UBC,PPP2R1A,PPP5C,PSMA7,PSMB2,PSMB3,PSMB6,PSMB7,PSMC3,PSMC4,PSMC5,PSMD3,PSMD7,PSMD8,PSMD11,SEM1
Pathway	413341	Glycolysis, core module involving three-carbon compounds	2.196e-05	0.0377	0.0002083	0.001672	5	12	GAPDH,TPI1,PGAM4,PKM,ENO1
Pathway	1269185	Downstream signaling events of B Cell Receptor (BCR)	2.239e-05	0.03845	0.0002105	0.001689	19	199	NFKBIB,MLST8,UBA52,UBB,UBC,PPP2R1A,PSMA7,PSMB2,PSMB3,PSMB6,PSMB7,PSMC3,PSMC4,PSMC5,PSMD3,PSMD7,PSMD8,PSMD11,SEM1
Pathway	1269470	Frs2-mediated activation	2.243e-05	0.03852	0.0002105	0.001689	22	253	LAMTOR2,WDR83,PEBP1,PHB,UBA52,UBB,UBC,PPP2R1A,PPP5C,PSMA7,PSMB2,PSMB3,PSMB6,PSMB7,PSMC3,PSMC4,PSMC5,PSMD3,PSMD7,PSMD8,PSMD11,SEM1
Pathway	1269502	MAPK1/MAPK3 signaling	2.384e-05	0.04094	0.0002225	0.001786	22	254	LAMTOR2,WDR83,PEBP1,PHB,UBA52,UBB,UBC,PPP2R1A,PPP5C,PSMA7,PSMB2,PSMB3,PSMB6,PSMB7,PSMC3,PSMC4,PSMC5,PSMD3,PSMD7,PSMD8,PSMD11,SEM1
Pathway	1269469	Prolonged ERK activation events	2.534e-05	0.0435	0.0002352	0.001887	22	255	LAMTOR2,WDR83,PEBP1,PHB,UBA52,UBB,UBC,PPP2R1A,PPP5C,PSMA7,PSMB2,PSMB3,PSMB6,PSMB7,PSMC3,PSMC4,PSMC5,PSMD3,PSMD7,PSMD8,PSMD11,SEM1
Pathway	1269632	Signaling by Leptin	2.691e-05	0.04621	0.0002484	0.001994	22	256	LAMTOR2,WDR83,PEBP1,PHB,UBA52,UBB,UBC,PPP2R1A,PPP5C,PSMA7,PSMB2,PSMB3,PSMB6,PSMB7,PSMC3,PSMC4,PSMC5,PSMD3,PSMD7,PSMD8,PSMD11,SEM1
Pathway	PW:0000025	glycolysis/gluconeogenesis	2.839e-05	0.04874	0.0002606	0.002092	7	29	AKR1A1,ALDOC,GAPDH,TPI1,PFKM,PKM,ENO1
Pathway	1269322	Interleukin receptor SHC signaling	3.033e-05	0.05208	0.000277	0.002223	22	258	LAMTOR2,WDR83,PEBP1,PHB,UBA52,UBB,UBC,PPP2R1A,PPP5C,PSMA7,PSMB2,PSMB3,PSMB6,PSMB7,PSMC3,PSMC4,PSMC5,PSMD3,PSMD7,PSMD8,PSMD11,SEM1
Pathway	1269465	Signalling to RAS	3.218e-05	0.05526	0.0002924	0.002347	22	259	LAMTOR2,WDR83,PEBP1,PHB,UBA52,UBB,UBC,PPP2R1A,PPP5C,PSMA7,PSMB2,PSMB3,PSMB6,PSMB7,PSMC3,PSMC4,PSMC5,PSMD3,PSMD7,PSMD8,PSMD11,SEM1
Pathway	142277	purine nucleotides de novo biosynthesis	3.304e-05	0.05673	0.0002986	0.002396	8	40	ATP5F1EP2,ATP5F1A,ATP5F1B,ATP5ME,NME1,NME2P1,GUK1,ATP5MF
Pathway	413373	N-glycosylation by oligosaccharyltransferase	3.404e-05	0.05844	0.0003046	0.002444	4	7	RPN1,RPN2,DAD1,DDOST
Pathway	1269093	Vpr-mediated induction of apoptosis by mitochondrial outer membrane permeabilization	3.406e-05	0.05848	0.0003046	0.002444	3	3	SLC25A4,SLC25A5,SLC25A6
Pathway	PW:0000057	carbon fixation	3.474e-05	0.05965	0.0003091	0.002481	5	13	MDH2,ALDOC,TKT,TPI1,PKM
Pathway	1427862	Ub-specific processing proteases	3.862e-05	0.06631	0.0003416	0.002742	20	225	OTUB1,RUVBL1,ADRM1,UBA52,UBB,UBC,UFD1,PSMA7,PSMB2,PSMB3,PSMB6,PSMB7,PSMC3,PSMC4,PSMC5,PSMD3,PSMD7,PSMD8,PSMD11,SEM1
Pathway	1269753	G2/M Checkpoints	3.88e-05	0.06662	0.0003416	0.002742	17	172	UBA52,UBB,UBC,PSMA7,PSMB2,PSMB3,PSMB6,PSMB7,PSMC3,PSMC4,PSMC5,PSMD3,PSMD7,PSMD8,PSMD11,SEM1,RFC2
Pathway	1270369	Translesion synthesis by Y family DNA polymerases bypasses lesions on DNA template	3.991e-05	0.06853	0.0003496	0.002806	8	41	MAD2L2,UBE2L6,UBA52,UBB,UBC,UFD1,POLE4,RFC2
Pathway	1269321	Interleukin-2 signaling	4.559e-05	0.07827	0.0003973	0.003189	22	265	LAMTOR2,WDR83,PEBP1,PHB,UBA52,UBB,UBC,PPP2R1A,PPP5C,PSMA7,PSMB2,PSMB3,PSMB6,PSMB7,PSMC3,PSMC4,PSMC5,PSMD3,PSMD7,PSMD8,PSMD11,SEM1
Pathway	1269464	Signalling to ERKs	4.825e-05	0.08285	0.0004184	0.003358	22	266	LAMTOR2,WDR83,PEBP1,PHB,UBA52,UBB,UBC,PPP2R1A,PPP5C,PSMA7,PSMB2,PSMB3,PSMB6,PSMB7,PSMC3,PSMC4,PSMC5,PSMD3,PSMD7,PSMD8,PSMD11,SEM1
Pathway	1269959	Glucose metabolism	5.275e-05	0.09057	0.0004551	0.003653	11	81	MDH2,ALDOC,GAPDH,TPI1,PFKM,UBA52,UBB,UBC,PKM,PPP2R1A,ENO1
Pathway	1269960	Glycolysis	5.632e-05	0.09671	0.0004835	0.003881	7	32	ALDOC,GAPDH,TPI1,PFKM,PKM,PPP2R1A,ENO1
Pathway	1427866	RET signaling	7.116e-05	0.1222	0.0006079	0.004879	22	273	LAMTOR2,WDR83,PEBP1,PHB,UBA52,UBB,UBC,PPP2R1A,PPP5C,PSMA7,PSMB2,PSMB3,PSMB6,PSMB7,PSMC3,PSMC4,PSMC5,PSMD3,PSMD7,PSMD8,PSMD11,SEM1
Pathway	814926	Carbon metabolism	7.322e-05	0.1257	0.0006223	0.004995	13	114	MDH2,ALDOC,GAPDH,TALDO1,TKT,TPI1,PFKM,PGAM4,PKM,IDH3B,IDH3G,ECHS1,ENO1
Pathway	1269483	VEGFA-VEGFR2 Pathway	7.402e-05	0.1271	0.0006261	0.005025	25	333	LAMTOR2,WDR83,BRK1,MLST8,PEBP1,PHB,UBA52,UBB,UBC,PPP2R1A,PPP5C,PRKCZ,PSMA7,PSMB2,PSMB3,PSMB6,PSMB7,PSMC3,PSMC4,PSMC5,PSMD3,PSMD7,PSMD8,PSMD11,SEM1
Pathway	1269299	FCERI mediated MAPK activation	7.512e-05	0.129	0.0006292	0.00505	22	274	LAMTOR2,WDR83,PEBP1,PHB,UBA52,UBB,UBC,PPP2R1A,PPP5C,PSMA7,PSMB2,PSMB3,PSMB6,PSMB7,PSMC3,PSMC4,PSMC5,PSMD3,PSMD7,PSMD8,PSMD11,SEM1
Pathway	1269323	Interleukin-3, 5 and GM-CSF signaling	7.512e-05	0.129	0.0006292	0.00505	22	274	LAMTOR2,WDR83,PEBP1,PHB,UBA52,UBB,UBC,PPP2R1A,PPP5C,PSMA7,PSMB2,PSMB3,PSMB6,PSMB7,PSMC3,PSMC4,PSMC5,PSMD3,PSMD7,PSMD8,PSMD11,SEM1
Pathway	PW:0000016	amyotrophic lateral sclerosis disease	7.686e-05	0.132	0.0006406	0.005141	5	15	SOD1,SSR4,GPX1,GPX4,CCS
Pathway	1270312	NCAM signaling for neurite out-growth	9.805e-05	0.1683	0.0008133	0.006527	22	279	LAMTOR2,WDR83,PEBP1,PHB,UBA52,UBB,UBC,PPP2R1A,PPP5C,PSMA7,PSMB2,PSMB3,PSMB6,PSMB7,PSMC3,PSMC4,PSMC5,PSMD3,PSMD7,PSMD8,PSMD11,SEM1
Pathway	1269742	Cell Cycle Checkpoints	0.0001029	0.1768	0.0008498	0.00682	18	204	ANAPC11,UBA52,UBB,UBC,PSMA7,PSMB2,PSMB3,PSMB6,PSMB7,PSMC3,PSMC4,PSMC5,PSMD3,PSMD7,PSMD8,PSMD11,SEM1,RFC2
Pathway	1269480	Signaling by VEGF	0.0001082	0.1857	0.0008886	0.007132	25	341	LAMTOR2,WDR83,BRK1,MLST8,PEBP1,PHB,UBA52,UBB,UBC,PPP2R1A,PPP5C,PRKCZ,PSMA7,PSMB2,PSMB3,PSMB6,PSMB7,PSMC3,PSMC4,PSMC5,PSMD3,PSMD7,PSMD8,PSMD11,SEM1
Pathway	1270370	Translesion synthesis by REV1	0.0001089	0.1869	0.00089	0.007143	5	16	MAD2L2,UBA52,UBB,UBC,RFC2
Pathway	1269090	Budding and maturation of HIV virion	0.0001117	0.1918	0.000909	0.007296	6	25	CHMP2A,UBA52,UBB,UBC,CHMP6,VPS28
Pathway	1427860	Deubiquitination	0.0001215	0.2086	0.0009839	0.007897	23	303	ACTB,MCRS1,OTUB1,RUVBL1,ADRM1,UBA52,UBB,UBC,UCHL1,UFD1,PSMA7,PSMB2,PSMB3,PSMB6,PSMB7,PSMC3,PSMC4,PSMC5,PSMD3,PSMD7,PSMD8,PSMD11,SEM1
Pathway	1268714	Asparagine N-linked glycosylation	0.0001336	0.2294	0.001077	0.008645	22	285	RPN1,RPN2,SEC13,NAGK,DYNLL1,TRAPPC2L,DPM2,LMAN2,TMED3,DCTN3,COPE,TRAPPC1,UBA52,UBB,UBC,TRAPPC6A,PMM1,DAD1,DDOST,COG7,DOLPP1,UBXN1
Pathway	413342	Gluconeogenesis, oxaloacetate => fructose-6P	0.0001502	0.2578	0.001194	0.00958	5	17	ALDOC,GAPDH,TPI1,PGAM4,ENO1
Pathway	1270372	Translesion synthesis by POLK	0.0001502	0.2578	0.001194	0.00958	5	17	MAD2L2,UBA52,UBB,UBC,RFC2
Pathway	1270373	Translesion synthesis by POLI	0.0001502	0.2578	0.001194	0.00958	5	17	MAD2L2,UBA52,UBB,UBC,RFC2
Pathway	1383087	rRNA modification in the nucleus and cytosol	0.0001698	0.2916	0.001344	0.01079	9	63	RPS6,RPS9,RPS14,NOP10,NOP56,NHP2,IMP4,SNU13,DDX49
Pathway	1270367	DNA Damage Bypass	0.0001742	0.2991	0.001372	0.01101	8	50	MAD2L2,UBE2L6,UBA52,UBB,UBC,UFD1,POLE4,RFC2
Pathway	M15371	Electron Transport Reaction in Mitochondria	0.0001891	0.3246	0.001482	0.0119	4	10	SLC25A4,SLC25A6,ATP5F1A,UQCRC1
Pathway	1269501	MAPK family signaling cascades	0.0001986	0.3411	0.00155	0.01244	22	293	LAMTOR2,WDR83,PEBP1,PHB,UBA52,UBB,UBC,PPP2R1A,PPP5C,PSMA7,PSMB2,PSMB3,PSMB6,PSMB7,PSMC3,PSMC4,PSMC5,PSMD3,PSMD7,PSMD8,PSMD11,SEM1
Pathway	1309120	Gap-filling DNA repair synthesis and ligation in TC-NER	0.0002168	0.3722	0.001684	0.01352	9	65	UBA52,UBB,UBC,POLR2F,POLR2H,POLR2I,POLR2L,POLE4,RFC2
Pathway	1269183	Signaling by the B Cell Receptor (BCR)	0.0002223	0.3817	0.001719	0.0138	19	236	NFKBIB,MLST8,UBA52,UBB,UBC,PPP2R1A,PSMA7,PSMB2,PSMB3,PSMB6,PSMB7,PSMC3,PSMC4,PSMC5,PSMD3,PSMD7,PSMD8,PSMD11,SEM1
Pathway	1309119	Dual incision in TC-NER	0.000244	0.419	0.001879	0.01508	9	66	UBA52,UBB,UBC,POLR2F,POLR2H,POLR2I,POLR2L,POLE4,RFC2
Pathway	1270371	Translesion Synthesis by POLH	0.0002676	0.4594	0.002051	0.01646	5	19	UBA52,UBB,UBC,UFD1,RFC2
Pathway	1269087	Synthesis And Processing Of GAG, GAGPOL Polyproteins	0.0002896	0.4973	0.0022	0.01766	4	11	UBA52,UBB,UBC,VPS28
Pathway	1269088	Membrane binding and targetting of GAG proteins	0.0002896	0.4973	0.0022	0.01766	4	11	UBA52,UBB,UBC,VPS28
Pathway	1269460	NGF signalling via TRKA from the plasma membrane	0.0003584	0.6154	0.002711	0.02176	26	390	LAMTOR2,WDR83,MLST8,PEBP1,PHB,UBA52,UBB,UBC,AP2M1,AP2S1,CLTA,PPP2R1A,PPP5C,PSMA7,PSMB2,PSMB3,PSMB6,PSMB7,PSMC3,PSMC4,PSMC5,PSMD3,PSMD7,PSMD8,PSMD11,SEM1
Pathway	PW:0000035	ATP synthetic	0.0004234	0.727	0.003189	0.02559	4	12	ATP5F1A,ATP5MC2,ATP6AP1,ATP6V0D1
Pathway	1268855	Diseases of signal transduction	0.0004284	0.7356	0.003212	0.02578	25	373	MLST8,PEBP1,PHB,UBA52,UBB,UBC,POLR2F,POLR2H,POLR2I,POLR2L,PORCN,PPP2R1A,PSMA7,PSMB2,PSMB3,PSMB6,PSMB7,PSMC3,PSMC4,PSMC5,PSMD3,PSMD7,PSMD8,PSMD11,SEM1
Pathway	835389	adenosine ribonucleotides de novo biosynthesis	0.0004441	0.7625	0.003315	0.02661	5	21	ATP5F1EP2,ATP5F1A,ATP5F1B,ATP5ME,ATP5MF
Pathway	1269810	M Phase	0.0004553	0.7817	0.003384	0.02716	22	311	SEC13,CENPT,ANAPC11,BANF1,NCAPH2,UBA52,UBB,UBC,PPP2R1A,PSMA7,PSMB2,PSMB3,PSMB6,PSMB7,PSMC3,PSMC4,PSMC5,PSMD3,PSMD7,PSMD8,PSMD11,SEM1
Pathway	1269193	Antigen processing: Ubiquitination & Proteasome degradation	0.0005186	0.8905	0.003838	0.03081	22	314	ANAPC11,ELOB,RNF25,UBE2L6,UBA52,UBB,UBC,FBXO44,PSMA7,PSMB2,PSMB3,PSMB6,PSMB7,FBXL12,PSMC3,PSMC4,PSMC5,PSMD3,PSMD7,PSMD8,PSMD11,SEM1
Pathway	1268693	Protein folding	0.0005447	0.9352	0.004014	0.03221	11	105	ACTB,TUBB3,PFDN6,NOP56,CCT7,CCT5,GNG3,TUBA1C,PFDN1,PFDN5,TBCB
Pathway	1269086	Assembly Of The HIV Virion	0.0005962	1	0.004337	0.03481	4	13	UBA52,UBB,UBC,VPS28
Pathway	1270230	Cytosolic iron-sulfur cluster assembly	0.0005962	1	0.004337	0.03481	4	13	CIAO2B,MMS19,CIAPIN1,NUBP2
Pathway	SMP00040	Glycolysis	0.0005962	1	0.004337	0.03481	4	13	GAPDH,TPI1,PFKM,PKM
Pathway	1269594	Signaling by Wnt	0.0006353	1	0.004583	0.03678	23	340	RUVBL1,GNG3,UBA52,UBB,UBC,AP2M1,AP2S1,CLTA,PORCN,PPP2R1A,PSMA7,PSMB2,PSMB3,PSMB6,PSMB7,PSMC3,PSMC4,PSMC5,PSMD3,PSMD7,PSMD8,PSMD11,SEM1
Pathway	1269487	Signaling by SCF-KIT	0.0006353	1	0.004583	0.03678	23	340	LAMTOR2,WDR83,MLST8,PEBP1,PHB,UBA52,UBB,UBC,PPP2R1A,PPP5C,PSMA7,PSMB2,PSMB3,PSMB6,PSMB7,PSMC3,PSMC4,PSMC5,PSMD3,PSMD7,PSMD8,PSMD11,SEM1
Pathway	1270374	Termination of translesion DNA synthesis	0.0006643	1	0.004753	0.03814	6	34	UBE2L6,UBA52,UBB,UBC,POLE4,RFC2
Pathway	M15898	Fructose and mannose metabolism	0.0006643	1	0.004753	0.03814	6	34	ALDOC,AKR1B1,PHPT1,TPI1,PFKM,PMM1
Pathway	M11521	Glycolysis / Gluconeogenesis	0.0007844	1	0.005588	0.04485	8	62	AKR1A1,ALDOC,GAPDH,TPI1,PFKM,PGAM4,PKM,ENO1
Pathway	PW:0000045	pentose phosphate	0.0008136	1	0.005773	0.04633	4	14	ALDOC,TALDO1,TKT,PFKM
Pathway	1269599	TCF dependent signaling in response to WNT	0.0008289	1	0.005857	0.04701	18	242	RUVBL1,UBA52,UBB,UBC,PPP2R1A,PSMA7,PSMB2,PSMB3,PSMB6,PSMB7,PSMC3,PSMC4,PSMC5,PSMD3,PSMD7,PSMD8,PSMD11,SEM1
Pathway	MAP00051_Fructose_and_mannose_metabolism	MAP00051 Fructose and mannose metabolism	0.0008568	1	0.006029	0.04839	5	24	ALDOC,AKR1B1,TPI1,PFKM,PMM1
Pathway	585562	Epstein-Barr virus infection	0.0008622	1	0.006042	0.0485	16	203	CSNK2A3,NFKBIB,ADRM1,POLR2F,POLR2H,POLR2I,POLR2L,PSMC3,PSMC4,PSMC5,PSMD3,PSMD7,PSMD8,PSMD11,PTMA,SEM1
Pathway	835393	superpathway of conversion of glucose to acetyl CoA and entry into the TCA cycle	0.0009114	1	0.006361	0.05105	6	36	MDH2,ALDOC,PFKM,PGAM4,PKM,IDH3G
Pathway	1269654	Transcriptional Regulation by TP53	0.001022	1	0.007104	0.05702	24	374	LAMTOR2,NELFCD,MLST8,ELOB,PRDX2,PRDX1,TXN,UBA52,UBB,UBC,PIN1,PRMT1,PRDX5,COX4I1,POLR2F,COX6B1,POLR2H,POLR2I,POLR2L,PPP2R1A,TMEM219,LAMTOR1,RABGGTA,RFC2
Pathway	1269720	MicroRNA (miRNA) biogenesis	0.001043	1	0.007159	0.05746	5	25	TARBP2,POLR2F,POLR2H,POLR2I,POLR2L
Pathway	1269078	Abortive elongation of HIV-1 transcript in the absence of Tat	0.001043	1	0.007159	0.05746	5	25	NELFCD,POLR2F,POLR2H,POLR2I,POLR2L
Pathway	1309116	Gap-filling DNA repair synthesis and ligation in GG-NER	0.001043	1	0.007159	0.05746	5	25	UBA52,UBB,UBC,POLE4,RFC2
Pathway	1269858	Telomere Extension By Telomerase	0.001047	1	0.007159	0.05746	3	7	NHP2,RUVBL1,RUVBL2
Pathway	1270111	Insulin effects increased synthesis of Xylulose-5-Phosphate	0.001065	1	0.007257	0.05825	2	2	TALDO1,TKT
Pathway	782396	glycolysis	0.001082	1	0.00734	0.05891	4	15	ALDOC,PFKM,PGAM4,PKM
Pathway	1269479	Downstream signal transduction	0.001139	1	0.007702	0.06181	23	355	LAMTOR2,WDR83,MLST8,PEBP1,PHB,UBA52,UBB,UBC,PPP2R1A,PPP5C,PSMA7,PSMB2,PSMB3,PSMB6,PSMB7,PSMC3,PSMC4,PSMC5,PSMD3,PSMD7,PSMD8,PSMD11,SEM1
Pathway	1268694	Chaperonin-mediated protein folding	0.001279	1	0.008612	0.06912	10	99	ACTB,TUBB3,PFDN6,NOP56,CCT7,CCT5,GNG3,TUBA1C,PFDN1,PFDN5
Pathway	82926	Glycolysis / Gluconeogenesis	0.001316	1	0.008794	0.07058	8	67	AKR1A1,ALDOC,GAPDH,TPI1,PFKM,PGAM4,PKM,ENO1
Pathway	1270432	Macroautophagy	0.001316	1	0.008794	0.07058	8	67	LAMTOR2,DYNLL1,CHMP2A,ATG4B,MLST8,WDR45,LAMTOR1,CHMP6
Pathway	1269284	DAP12 signaling	0.001321	1	0.008794	0.07058	23	359	LAMTOR2,WDR83,MLST8,PEBP1,PHB,UBA52,UBB,UBC,PPP2R1A,PPP5C,PSMA7,PSMB2,PSMB3,PSMB6,PSMB7,PSMC3,PSMC4,PSMC5,PSMD3,PSMD7,PSMD8,PSMD11,SEM1
Pathway	1269877	Membrane Trafficking	0.001389	1	0.009177	0.07366	34	614	RABEPK,SEC13,VPS25,MON1A,NAA38,DYNLL1,TRAPPC2L,USE1,CHMP2A,AP1M1,LMAN2,COPS6,GPS1,TMED3,PAFAH1B3,DCTN3,SNF8,COPE,ARFIP2,TRAPPC1,UBA52,UBB,RAB33A,UBC,AP2M1,AP2S1,CLTA,COPS7B,TRAPPC6A,CHMP6,COG7,ARPC2,ARFRP1,VPS28
Pathway	1269058	HIV Life Cycle	0.00139	1	0.009177	0.07366	13	154	NELFCD,CHMP2A,BANF1,ELOB,UBA52,UBB,UBC,POLR2F,POLR2H,POLR2I,POLR2L,CHMP6,VPS28
Pathway	MAP00710_Carbon_fixation	MAP00710 Carbon fixation	0.001406	1	0.009177	0.07366	4	16	MDH2,ALDOC,TPI1,PKM
Pathway	1269398	Spry regulation of FGF signaling	0.001406	1	0.009177	0.07366	4	16	UBA52,UBB,UBC,PPP2R1A
Pathway	PW:0000041	fructose and mannose metabolic	0.001406	1	0.009177	0.07366	4	16	ALDOC,AKR1B1,TPI1,PFKM
Pathway	1269082	Tat-mediated HIV elongation arrest and recovery	0.001612	1	0.01041	0.08351	6	40	NELFCD,ELOB,POLR2F,POLR2H,POLR2I,POLR2L
Pathway	1269083	Pausing and recovery of Tat-mediated HIV elongation	0.001612	1	0.01041	0.08351	6	40	NELFCD,ELOB,POLR2F,POLR2H,POLR2I,POLR2L
Pathway	1269288	Negative regulation of MAPK pathway	0.001612	1	0.01041	0.08351	6	40	PEBP1,UBA52,UBB,UBC,PPP2R1A,PPP5C
Pathway	1269500	Downregulation of ERBB4 signaling	0.001635	1	0.01047	0.08405	3	8	UBA52,UBB,UBC
Pathway	172845	Sulfur relay system	0.001635	1	0.01047	0.08405	3	8	CTU2,MOCS3,URM1
Pathway	1269655	TP53 Regulates Metabolic Genes	0.001726	1	0.01102	0.08841	9	86	LAMTOR2,MLST8,PRDX2,PRDX1,TXN,PRDX5,COX4I1,COX6B1,LAMTOR1
Pathway	1269380	Signaling by EGFR	0.001762	1	0.0112	0.08991	23	367	LAMTOR2,WDR83,MLST8,PEBP1,PHB,UBA52,UBB,UBC,PPP2R1A,PPP5C,PSMA7,PSMB2,PSMB3,PSMB6,PSMB7,PSMC3,PSMC4,PSMC5,PSMD3,PSMD7,PSMD8,PSMD11,SEM1
Pathway	1269526	TGF-beta receptor signaling in EMT (epithelial to mesenchymal transition)	0.001792	1	0.01123	0.09013	4	17	UBA52,UBB,UBC,PRKCZ
Pathway	1270186	Metabolism of porphyrins	0.001792	1	0.01123	0.09013	4	17	ALAS1,BLVRB,HMOX2,UROD
Pathway	MAP03020_RNA_polymerase	MAP03020 RNA polymerase	0.001792	1	0.01123	0.09013	4	17	POLR2F,POLR2H,POLR2I,POLR2L
Pathway	PW:0000071	valine, leucine and isoleucine degradation	0.001792	1	0.01123	0.09013	4	17	BCAT2,HSD17B10,IVD,ECHS1
Pathway	1269069	Late Phase of HIV Life Cycle	0.001959	1	0.01223	0.09817	12	141	NELFCD,CHMP2A,ELOB,UBA52,UBB,UBC,POLR2F,POLR2H,POLR2I,POLR2L,CHMP6,VPS28
Pathway	1269081	Pausing and recovery of HIV elongation	0.002087	1	0.01294	0.1038	6	42	NELFCD,ELOB,POLR2F,POLR2H,POLR2I,POLR2L
Pathway	1269079	HIV elongation arrest and recovery	0.002087	1	0.01294	0.1038	6	42	NELFCD,ELOB,POLR2F,POLR2H,POLR2I,POLR2L
Pathway	M1724	RNA polymerase	0.002098	1	0.01296	0.104	5	29	POLR1H,POLR2F,POLR2H,POLR2I,POLR2L
Pathway	1269283	DAP12 interactions	0.002244	1	0.01381	0.1109	23	374	LAMTOR2,WDR83,MLST8,PEBP1,PHB,UBA52,UBB,UBC,PPP2R1A,PPP5C,PSMA7,PSMB2,PSMB3,PSMB6,PSMB7,PSMC3,PSMC4,PSMC5,PSMD3,PSMD7,PSMD8,PSMD11,SEM1
Pathway	1470918	InlA-mediated entry of Listeria monocytogenes into host cells	0.002394	1	0.01457	0.1169	3	9	UBA52,UBB,UBC
Pathway	1270360	Displacement of DNA glycosylase by APEX1	0.002394	1	0.01457	0.1169	3	9	MPG,APEX1,NTHL1
Pathway	1383031	PTK6 Regulates RTKs and Their Effectors AKT1 and DOK1	0.002394	1	0.01457	0.1169	3	9	UBA52,UBB,UBC
Pathway	1269192	Class I MHC mediated antigen processing & presentation	0.002401	1	0.01457	0.1169	23	376	SEC13,ANAPC11,ELOB,RNF25,UBE2L6,UBA52,UBB,UBC,FBXO44,PSMA7,PSMB2,PSMB3,PSMB6,PSMB7,FBXL12,PSMC3,PSMC4,PSMC5,PSMD3,PSMD7,PSMD8,PSMD11,SEM1
Pathway	1270368	Recognition of DNA damage by PCNA-containing replication complex	0.002452	1	0.01483	0.119	5	30	UBA52,UBB,UBC,POLE4,RFC2
Pathway	1269763	Cell Cycle, Mitotic	0.002555	1	0.01539	0.1235	29	517	SEC13,CENPT,ANAPC11,DYNLL1,BANF1,CDC25B,DCTN3,CDK4,CETN2,NCAPH2,UBA52,UBB,UBC,POLE4,PPP2R1A,PSMA7,PSMB2,PSMB3,PSMB6,PSMB7,PSMC3,PSMC4,PSMC5,PSMD3,PSMD7,PSMD8,PSMD11,SEM1,RFC2
Pathway	1268701	Post-translational protein modification	0.002594	1	0.01558	0.125	50	1041	RPN1,RPN2,RNF181,ACTB,NRN1,MCRS1,SEC13,NAGK,OTUB1,RUVBL1,DYNLL1,TRAPPC2L,DPM2,LMAN2,NSMCE1,ADRM1,TMED3,DCTN3,CETN2,COPE,TRAPPC1,UBA52,UBB,RAB33A,UBC,UCHL1,UFD1,TRAPPC6A,PMM1,B3GNTL1,PAF1,PSMA7,PSMB2,PSMB3,PSMB6,PSMB7,DAD1,PSMC3,PSMC4,PSMC5,PSMD3,PSMD7,PSMD8,PSMD11,DDOST,RABGGTA,SEM1,COG7,DOLPP1,UBXN1
Pathway	1269478	Signaling by PDGF	0.002654	1	0.01588	0.1275	23	379	LAMTOR2,WDR83,MLST8,PEBP1,PHB,UBA52,UBB,UBC,PPP2R1A,PPP5C,PSMA7,PSMB2,PSMB3,PSMB6,PSMB7,PSMC3,PSMC4,PSMC5,PSMD3,PSMD7,PSMD8,PSMD11,SEM1
Pathway	1269399	Signaling by FGFR2	0.002726	1	0.01625	0.1305	8	75	UBA52,UBB,UBC,POLR2F,POLR2H,POLR2I,POLR2L,PPP2R1A
Pathway	1269688	Processing of Capped Intron-Containing Pre-mRNA	0.002738	1	0.01627	0.1306	17	248	PUF60,NXT1,LSM2,SNRPD2,LSM7,ZMAT5,SNU13,PRPF4,POLR2F,POLR2H,POLR2I,POLR2L,THOC6,SF3B5,SNRNP25,PQBP1,DDX39A
Pathway	1383045	Signaling by FGFR2 IIIa TM	0.002774	1	0.01642	0.1318	4	19	POLR2F,POLR2H,POLR2I,POLR2L
Pathway	1269298	Fc epsilon receptor (FCERI) signaling	0.002835	1	0.01669	0.1339	23	381	LAMTOR2,WDR83,MLST8,PEBP1,PHB,UBA52,UBB,UBC,PPP2R1A,PPP5C,PSMA7,PSMB2,PSMB3,PSMB6,PSMB7,PSMC3,PSMC4,PSMC5,PSMD3,PSMD7,PSMD8,PSMD11,SEM1
Pathway	MAP00620_Pyruvate_metabolism	MAP00620 Pyruvate metabolism	0.002848	1	0.01669	0.1339	5	31	MDH2,AKR1B1,HAGH,GRHPR,PKM
Pathway	1269857	Extension of Telomeres	0.002848	1	0.01669	0.1339	5	31	NHP2,RUVBL1,RUVBL2,POLE4,RFC2
Pathway	P02748	Isoleucine biosynthesis	0.003025	1	0.01755	0.1408	2	3	BCAT2,ILVBL
Pathway	P02721	ATP synthesis	0.003025	1	0.01755	0.1408	2	3	ATP5F1A,ATP5F1B
Pathway	P02785	Valine biosynthesis	0.003025	1	0.01755	0.1408	2	3	BCAT2,ILVBL
Pathway	1269961	Gluconeogenesis	0.003288	1	0.01884	0.1512	5	32	MDH2,ALDOC,GAPDH,TPI1,ENO1
Pathway	83037	RNA polymerase	0.003288	1	0.01884	0.1512	5	32	POLR1H,POLR2F,POLR2H,POLR2I,POLR2L
Pathway	1268698	Folding of actin by CCT/TriC	0.003339	1	0.01884	0.1512	3	10	ACTB,CCT7,CCT5
Pathway	1269209	IRAK2 mediated activation of TAK1 complex	0.003339	1	0.01884	0.1512	3	10	UBA52,UBB,UBC
Pathway	M96	Free Radical Induced Apoptosis	0.003339	1	0.01884	0.1512	3	10	SOD1,GPX1,GSS
Pathway	1268940	Diseases of carbohydrate metabolism	0.003339	1	0.01884	0.1512	3	10	UBA52,UBB,UBC
Pathway	1268954	Myoclonic epilepsy of Lafora	0.003339	1	0.01884	0.1512	3	10	UBA52,UBB,UBC
Pathway	1268953	Glycogen storage diseases	0.003339	1	0.01884	0.1512	3	10	UBA52,UBB,UBC
Pathway	M11079	N-Glycan biosynthesis	0.003347	1	0.01884	0.1512	6	46	RPN1,RPN2,DPM2,DAD1,DDOST,DOLPP1
Pathway	1269741	Cell Cycle	0.003377	1	0.01895	0.1521	33	624	SEC13,CENPT,ANAPC11,NHP2,RUVBL1,DYNLL1,CENPX,RUVBL2,BANF1,CDC25B,DCTN3,CDK4,CETN2,NCAPH2,UBA52,UBB,UBC,POLE4,PPP2R1A,PSMA7,PSMB2,PSMB3,PSMB6,PSMB7,PSMC3,PSMC4,PSMC5,PSMD3,PSMD7,PSMD8,PSMD11,SEM1,RFC2
Pathway	1270303	Axon guidance	0.00364	1	0.02036	0.1634	30	554	ACTB,ACTG1,LAMTOR2,WDR83,PEBP1,CFL1,LYPLA2,PHB,UBA52,UBB,UBC,AP2M1,AP2S1,CLTA,PPP2R1A,PPP5C,PSMA7,PSMB2,PSMB3,PSMB6,PSMB7,PSMC3,PSMC4,PSMC5,PSMD3,PSMD7,PSMD8,PSMD11,SEM1,ARPC2
Pathway	M66	Validated targets of C-MYC transcriptional activation	0.003774	1	0.02097	0.1683	8	79	RUVBL1,GAPDH,RUVBL2,NME1,CDK4,PFKM,PTMA,ENO1
Pathway	82930	Fructose and mannose metabolism	0.003774	1	0.02097	0.1683	5	33	ALDOC,AKR1B1,TPI1,PFKM,PMM1
Pathway	PW:0000640	glycolysis pathway	0.004071	1	0.02255	0.181	4	21	GAPDH,PFKM,PKM,ENO1
Pathway	1269689	mRNA Splicing	0.004379	1	0.02418	0.194	14	196	PUF60,LSM2,SNRPD2,LSM7,ZMAT5,SNU13,PRPF4,POLR2F,POLR2H,POLR2I,POLR2L,SF3B5,SNRNP25,PQBP1
Pathway	169351	Validated targets of C-MYC transcriptional activation	0.004402	1	0.02423	0.1944	8	81	RUVBL1,GAPDH,RUVBL2,NME1,CDK4,PFKM,PTMA,ENO1
Pathway	1269876	Vesicle-mediated transport	0.004433	1	0.02432	0.1952	34	660	RABEPK,SEC13,VPS25,MON1A,NAA38,DYNLL1,TRAPPC2L,USE1,CHMP2A,AP1M1,LMAN2,COPS6,GPS1,TMED3,PAFAH1B3,DCTN3,SNF8,COPE,ARFIP2,TRAPPC1,UBA52,UBB,RAB33A,UBC,AP2M1,AP2S1,CLTA,COPS7B,TRAPPC6A,CHMP6,COG7,ARPC2,ARFRP1,VPS28
Pathway	PW:0000134	glutathione metabolic	0.004482	1	0.02451	0.1967	3	11	GPX1,GPX4,GSS
Pathway	1427859	Cargo recognition for clathrin-mediated endocytosis	0.004514	1	0.0246	0.1975	9	99	COPS6,GPS1,UBA52,UBB,UBC,AP2M1,AP2S1,CLTA,COPS7B
Pathway	82975	N-Glycan biosynthesis	0.00461	1	0.02505	0.201	6	49	RPN1,RPN2,DPM2,DAD1,DDOST,DOLPP1
Pathway	M5500	Base excision repair	0.004899	1	0.02629	0.211	5	35	HMGB1P1,MPG,APEX1,NTHL1,POLE4
Pathway	1269683	Formation of the Early Elongation Complex	0.004899	1	0.02629	0.211	5	35	NELFCD,POLR2F,POLR2H,POLR2I,POLR2L
Pathway	1269075	Formation of the HIV-1 Early Elongation Complex	0.004899	1	0.02629	0.211	5	35	NELFCD,POLR2F,POLR2H,POLR2I,POLR2L
Pathway	1383079	Regulation of TP53 Degradation	0.004899	1	0.02629	0.211	5	35	MLST8,UBA52,UBB,UBC,PPP2R1A
Pathway	1269264	Negative regulators of RIG-I/MDA5 signaling	0.005542	1	0.02944	0.2363	5	36	UBE2L6,UBA52,UBB,UBC,PIN1
Pathway	1383077	Regulation of TP53 Expression and Degradation	0.005542	1	0.02944	0.2363	5	36	MLST8,UBA52,UBB,UBC,PPP2R1A
Pathway	1269682	RNA Polymerase II Transcription Elongation	0.005556	1	0.02944	0.2363	7	67	NELFCD,ELOB,POLR2F,POLR2H,POLR2I,POLR2L,PAF1
Pathway	1269684	Formation of RNA Pol II elongation complex	0.005556	1	0.02944	0.2363	7	67	NELFCD,ELOB,POLR2F,POLR2H,POLR2I,POLR2L,PAF1
Pathway	1309218	Mitophagy	0.005727	1	0.02998	0.2406	4	23	UBA52,UBB,UBC,TOMM7
Pathway	1309219	Pink/Parkin Mediated Mitophagy	0.005727	1	0.02998	0.2406	4	23	UBA52,UBB,UBC,TOMM7
Pathway	1269848	APC/C:Cdc20 mediated degradation of Cyclin B	0.005727	1	0.02998	0.2406	4	23	ANAPC11,UBA52,UBB,UBC
Pathway	1269438	mTORC1-mediated signalling	0.005727	1	0.02998	0.2406	4	23	RPS6,LAMTOR2,MLST8,LAMTOR1
Pathway	142358	isoleucine degradation	0.005835	1	0.03009	0.2415	3	12	BCAT2,HSD17B10,ECHS1
Pathway	835390	guanosine ribonucleotides de novo biosynthesis	0.005835	1	0.03009	0.2415	3	12	NME1,NME2P1,GUK1
Pathway	782395	purine deoxyribonucleosides salvage	0.005835	1	0.03009	0.2415	3	12	NME1,NME2P1,GUK1
Pathway	1427853	VLDLR internalisation and degradation	0.005835	1	0.03009	0.2415	3	12	AP2M1,AP2S1,CLTA
Pathway	1427864	Josephin domain DUBs	0.005835	1	0.03009	0.2415	3	12	UBA52,UBB,UBC
Pathway	545346	heme degradation	0.005919	1	0.03034	0.2435	2	4	BLVRB,HMOX2
Pathway	PW:0000574	pentose phosphate - non-oxidative phase	0.005919	1	0.03034	0.2435	2	4	TALDO1,TKT
Pathway	1269074	HIV Transcription Elongation	0.006193	1	0.03146	0.2525	6	52	NELFCD,ELOB,POLR2F,POLR2H,POLR2I,POLR2L
Pathway	1269076	Tat-mediated elongation of the HIV-1 transcript	0.006193	1	0.03146	0.2525	6	52	NELFCD,ELOB,POLR2F,POLR2H,POLR2I,POLR2L
Pathway	1269077	Formation of HIV-1 elongation complex containing HIV-1 Tat	0.006193	1	0.03146	0.2525	6	52	NELFCD,ELOB,POLR2F,POLR2H,POLR2I,POLR2L
Pathway	1270359	Resolution of Abasic Sites (AP sites)	0.006243	1	0.03153	0.253	5	37	MPG,APEX1,NTHL1,POLE4,RFC2
Pathway	1270351	Base Excision Repair	0.006243	1	0.03153	0.253	5	37	MPG,APEX1,NTHL1,POLE4,RFC2
Pathway	1269268	Cytosolic sensors of pathogen-associated DNA	0.006528	1	0.03287	0.2638	7	69	NFKBIB,UBA52,UBB,UBC,POLR2F,POLR2H,POLR2L
Pathway	199378	Ribosome biogenesis in eukaryotes	0.007044	1	0.03536	0.2838	9	106	POP7,NOP10,NOP56,NHP2,NXT1,CSNK2A3,IMP4,SNU13,EIF6
Pathway	1269443	Signalling by NGF	0.007094	1	0.03551	0.285	26	483	LAMTOR2,WDR83,MLST8,PEBP1,PHB,UBA52,UBB,UBC,AP2M1,AP2S1,CLTA,PPP2R1A,PPP5C,PSMA7,PSMB2,PSMB3,PSMB6,PSMB7,PSMC3,PSMC4,PSMC5,PSMD3,PSMD7,PSMD8,PSMD11,SEM1
Pathway	167325	Protein processing in endoplasmic reticulum	0.00733	1	0.03659	0.2937	12	166	RPN1,RPN2,SEC13,SSR4,NSFL1C,LMAN2,ERP29,HSPBP1,UFD1,DAD1,DDOST,BCAP31
Pathway	1269614	WNT5A-dependent internalization of FZD2, FZD5 and ROR2	0.007407	1	0.03665	0.2941	3	13	AP2M1,AP2S1,CLTA
Pathway	618581	Guanine ribonucleotide biosynthesis IMP => GDP,GTP	0.007407	1	0.03665	0.2941	3	13	NME1,GUK1,PKM
Pathway	1269495	Downregulation of ERBB2:ERBB3 signaling	0.007407	1	0.03665	0.2941	3	13	UBA52,UBB,UBC
Pathway	1269080	Formation of HIV elongation complex in the absence of HIV Tat	0.007447	1	0.03674	0.2949	6	54	NELFCD,ELOB,POLR2F,POLR2H,POLR2I,POLR2L
Pathway	1269386	Signaling by FGFR	0.007751	1	0.03813	0.306	8	89	UBA52,UBB,UBC,POLR2F,POLR2H,POLR2I,POLR2L,PPP2R1A
Pathway	1269847	APC-Cdc20 mediated degradation of Nek2A	0.007778	1	0.03816	0.3062	4	25	ANAPC11,UBA52,UBB,UBC
Pathway	1269766	G1 Phase	0.007826	1	0.03817	0.3064	5	39	CDK4,UBA52,UBB,UBC,PPP2R1A
Pathway	1269767	Cyclin D associated events in G1	0.007826	1	0.03817	0.3064	5	39	CDK4,UBA52,UBB,UBC,PPP2R1A
Pathway	M7934	Pyruvate metabolism	0.008714	1	0.04226	0.3392	5	40	MDH2,AKR1B1,HAGH,GRHPR,PKM
Pathway	1309121	Fanconi Anemia Pathway	0.008714	1	0.04226	0.3392	5	40	FANCG,CENPX,UBA52,UBB,UBC
Pathway	1268697	Formation of tubulin folding intermediates by CCT/TriC	0.008964	1	0.04335	0.348	4	26	TUBB3,CCT7,CCT5,TUBA1C
Pathway	1269476	Retrograde neurotrophin signalling	0.009205	1	0.04415	0.3543	3	14	AP2M1,AP2S1,CLTA
Pathway	1269453	p75NTR recruits signalling complexes	0.009205	1	0.04415	0.3543	3	14	UBA52,UBB,UBC
Pathway	1269454	NF-kB is activated and signals survival	0.009205	1	0.04415	0.3543	3	14	UBA52,UBB,UBC
Pathway	1309220	Catabolism of glucuronate to xylulose-5-phosphate	0.009657	1	0.04611	0.3701	2	5	AKR1A1,DCXR
Pathway	1309115	Dual Incision in GG-NER	0.009669	1	0.04611	0.3701	5	41	UBA52,UBB,UBC,POLE4,RFC2
Pathway	1269525	Downregulation of TGF-beta receptor signaling	0.01026	1	0.0484	0.3885	4	27	UBA52,UBB,UBC,PPP1CA
Pathway	1269681	RNA Pol II CTD phosphorylation and interaction with CE	0.01026	1	0.0484	0.3885	4	27	POLR2F,POLR2H,POLR2I,POLR2L
Pathway	M1386	Pentose phosphate pathway	0.01026	1	0.0484	0.3885	4	27	ALDOC,TALDO1,TKT,PFKM
Pathway	1269073	RNA Pol II CTD phosphorylation and interaction with CE during HIV infection	0.01026	1	0.0484	0.3885	4	27	POLR2F,POLR2H,POLR2I,POLR2L
Drug	ctd:C100187	chloropicrin	1.627e-71	4.167e-67	4.167e-67	4.47e-66	175	1264	RPL26,RPL30,RPL27A,RPL29,RPL31,RPL32,RPL34,RPL36AL,RPL38,RPLP0,RPLP1,RPLP2,RPS3,RPS5,RPS6,RPS27P29,RNF181,RPS8,MRPL51,RPS9,ACTB,RPS11,RPS12,RPS15,RPS16,RPS18,RPS21,TMEM14DP,RPS28,MDH2,TUBB3,FAU,RPS13P2,RACK1,AHCY,NOP10,UQCRHL,STOML2,RPL6P27,FLOT2,EEF1A1P11,LAMTOR2,SLC25A5,SLC25A6,C19orf53,ANXA2P1,ANXA2P2,APEH,TMEM183B,RPS23P8,DRAP1,NHP2,AHSA1,CAP1P2,PHPT1,SPINT2,RPL35P1,NXT1,FTH1P2,FTH1P7,FTH1P8,…
Drug	CID000000730	guanosine 5'-diphosphate disodium salt	7.302e-32	1.87e-27	9.349e-28	1.003e-26	85	650	RPL26,RPL27,RPL30,RPL27A,RPL28,RPL29,RPL31,RPL32,RPL34,RPL37,RPL37A,RPL38,RPLP0,RPLP1,RPLP2,RPN1,RPS3,RPS4Y1,RPS5,RPS6,RPS8,RPS9,RPS11,RPS12,RPS14,RPS15,RPS16,RPS18,RPS21,RPS24,RPS28,RPS29,TUBB3,FAU,SEC13,RPS10P3,EIF3C,EIF3G,EIF3H,EIF3I,TUBBP1,RPL10A,RPS3AP47,EIF2B3,EIF2B2,EIF3K,AP1M1,EEF1A1P9,NME1,MLST8,GNG3,RPL26P19,TUBA1C,RPL14,GUK1,RPL35,RPL13A,COPE,TUFM,TXN,UBA52,UFD1,CLTA,PKM,RPL14P1,RPL36,…
Drug	ctd:C051752	nefazodone	1.162e-31	2.975e-27	9.917e-28	1.064e-26	138	1605	CLPP,RPLP2,RPS3,RPS5,RPS6,RPS9,RPS12,RPS14,RPS15,RPS16,RPS21,AKR1A1,ECSIT,TMEM205,PEF1,TMEM147,ALAS1,PFDN6,STOML2,CREB3,LCMT1,COA3,NOP56,PSMG3,ALKBH7,CHCHD5,ADCK5,OTUB1,COMMD5,TMEM134,TRMT1,APEX1,CCT7,CHCHD6,NHP2,AHSA1,MSRB2,CCT5,SLC25A39,EBP,EIF3C,EIF3G,EIF3I,EXOSC7,ATP6V0B,BRK1,AUP1,USE1,JAGN1,RUVBL2,BCS1L,BANF1,NDUFV3,RPL10A,TMEM11,BLVRB,YIF1A,NSFL1C,PMPCA,IMP4,NFKBIB,AP1M1,EBNA1BP2,NSMCE1,MLX…
Drug	CID000001003	phosphate	2.618e-30	6.703e-26	1.676e-26	1.798e-25	141	1716	RPL26,RPL27,RPL30,RPL27A,RPL28,RPL29,RPL31,RPL32,RPL34,RPL37,RPL37A,RPL38,RPLP0,RPLP1,RPLP2,RPS3,RPS4Y1,RPS5,RPS6,MAEA,RPS8,RPS9,ACTB,RPS11,RPS12,RPS14,RPS15,RPS16,RPS18,RPS21,RPS24,RPS28,RPS29,MDH2,TUBB3,FAU,ALDOC,SEC13,MPG,SLC25A4,SLC25A5,SLC25A6,APEX1,CCT7,SIRT2,RPS10P3,CCT5,ASMTL,RPUSD2,EIF3C,EIF3G,EIF3H,EIF3I,EXOSC7,ATP5F1A,SOD1,ATP5F1B,ATP5MC2,ATP5ME,ATP6V0B,ATP6AP1,ATP5PO,GAPDH,INPP5K,NDUF…
Drug	ctd:C012655	nimesulide	1.802e-28	4.613e-24	9.227e-25	9.898e-24	112	1202	CLPP,RPL27,RPL34,RPL37,RPLP0,RPLP1,RPN1,RPS3,RPS5,RPS9,RPS11,RPS12,RPS14,RPS15,RPS16,RPS21,AKR1A1,TMEM205,PEF1,PEMT,TMEM147,ALAS1,STOML2,LCMT1,LAMTOR2,NOP56,MED29,ADCK5,OTUB1,COMMD5,APEX1,CCT7,CHCHD6,NAA38,APRT,NHP2,AHSA1,CCT5,CHID1,EIF3I,TRAPPC2L,ATP6V0B,AUP1,JAGN1,SSR4,BCS1L,BANF1,RPL10A,BLVRB,YIF1A,IMP4,MYDGF,EBNA1BP2,NME1,TMEM258,NSMCE1,ADRM1,GPX1,GSS,TMED3,WDR45,GCAT,GUK1,FAM3A,PRDX1,RPL13A,…
Drug	CID000000762	GTP - Na	2.208e-25	5.655e-21	9.424e-22	1.011e-20	92	925	RPL26,RPL27,RPL30,RPL27A,RPL28,RPL29,RPL31,RPL32,RPL34,RPL37,RPL37A,RPL38,RPLP0,RPLP1,RPLP2,RPN1,RPS3,RPS4Y1,RPS5,RPS6,RPS8,RPS9,RPS11,RPS12,RPS14,RPS15,RPS16,RPS18,RPS21,RPS24,RPS28,RPS29,POLR1H,TUBB3,FAU,SEC13,NELFCD,CCT7,SIRT2,RPS10P3,CCT5,EIF3C,EIF3G,EIF3H,EIF3I,TUBBP1,RPL10A,RPS3AP47,EIF2B3,EIF2B2,EIF3K,AP1M1,EEF1A1P9,NME1,MLST8,GNG3,TARBP2,RPL26P19,ELOB,TUBA1C,RPL14,RPL35,RPL13A,COPE,TUFM,T…
Drug	ctd:D014810	Vitamin E	5.707e-25	1.461e-20	2.088e-21	2.24e-20	125	1590	RPL27,RPL28,RPL38,ACTB,NAA10,MDH2,ECSIT,TMEM222,TUBB3,FARSA,PEF1,PEMT,PPME1,MCRS1,AKR1B1,STOML2,CREB3,SEC13,SELENOW,NAGK,NOP56,SLC25A4,SLC25A6,APEX1,AHSA1,NSUN5,THYN1,CIAO2B,ATOX1,LSM7,SOD1,ATP5F1B,ATP5ME,EDF1,GAPDH,INPP5K,FXYD6,SSR4,NDUFB8,BANF1,NDUFS3,NDUFV1,RPL10A,TMEM11,NSFL1C,SURF2,NFKBIB,EIF2B2,EIF3K,SNU13,LMAN2,MMS19,COPS6,TARBP2,TCEA2,PCGF1,HTRA2,ADRM1,GPX1,RPL14,PRDX2,ATP6V0D1,PEBP1,TKT,…
Drug	ctd:D012643	Selenium	9.466e-25	2.424e-20	3.03e-21	3.25e-20	125	1599	RPL27,RPL31,CDK2AP2,RPL37A,RPL38,ACTB,NAA10,ACTG1,RPS21,RPS29,ECSIT,TMEM222,TUBB3,FARSA,PEF1,PPME1,MCRS1,ALAS1,STOML2,CREB3,SEC13,FLOT2,SELENOW,NAGK,NOP56,SLC25A6,APEH,ERGIC3,RUVBL1,THYN1,ASMTL,EIF3C,SOD1,ATP5ME,EDF1,ATP6AP1,SPG7,GAPDH,USE1,INPP5K,NDUFB2,RUVBL2,CHMP2A,NDUFS3,NDUFV1,RPL10A,BLVRB,NFKBIB,SNU13,LMAN2,MMS19,MLST8,TALDO1,TMEM258,TARBP2,TCEA2,ADRM1,GPX1,GPX4,OAZ1,RPL14,AIP,PRDX2,WDR45,A…
Drug	ctd:D002995	Clofibric Acid	2.844e-24	7.281e-20	8.091e-21	8.679e-20	79	727	RPL27,RPL28,RPL31,RPL32,RPL34,RPL37,RPN2,RPS3,RPS5,RPS6,RPS9,RPS15,RPS18,RPS24,AKR1A1,RPS29,PEF1,PEMT,NAGK,SLC25A5,ZNF622,APEX1,CHCHD6,APRT,CUTA,NSUN5,ORMDL2,DYNLL1,EIF3C,EIF3G,EIF3H,EXOSC7,LSM7,ATP5PO,BCAT2,BCS1L,BANF1,NDUFS3,NDUFV1,NDUFS8,IMP4,EIF3K,ERP29,EBNA1BP2,NSMCE1,HTRA2,PEBP1,TMSB10,RPL13A,CDK4,TBRG4,ACOT7,TUFM,TXN,PRMT1,UQCRH,PRDX5,POLR2F,POR,DDX56,POLE4,MRPS26,NDUFS7,PSMB7,EXOSC5,DBI,D…
Drug	ctd:C099555	CD 437	3.529e-23	9.037e-19	8.777e-20	9.416e-19	43	223	RPL36AL,RPLP1,RPLP2,RPS15,RPS16,AKR1B1,STOML2,SLC25A4,SLC25A5,SLC25A6,EIF3G,EIF3I,SNRPD2,ATP5F1A,SOD1,ATP5F1B,ATP5PO,NDUFB9,BANF1,NDUFS5,NME1,TMEM258,CORO1A,WDR45,TMSB10,RPL35,RPL13A,CDK4,TXN,UBA52,AP2M1,AP2S1,PIN1,UQCRH,TOMM7,PSMD3,SEM1,ARPC2,TIMM8B,ENO1,RPL8,RPL13,RPL19
Drug	ctd:D004791	Enzyme Inhibitors	3.771e-23	9.655e-19	8.777e-20	9.416e-19	125	1667	RABEPK,RPL26,RPL27,RPL30,RPL27A,RPL29,RPL31,RPL32,RPL34,RPL37A,RPL38,RPLP0,RPLP1,RPLP2,MRPS12,RPS3,RPS5,RPS6,RPS8,RPS9,RPS12,ACTG1,RPS16,RPS24,AKR1A1,RPS29,MDH2,PEF1,FAU,RACK1,AHCY,PPME1,NOP10,AKR1B1,STOML2,NOP56,PUF60,SGTA,OTUB1,TRMT1,APEX1,CCT7,NUDT16L1,NHP2,EEF1A1P5,NSUN5,RUVBL1,THYN1,CCT5,SAP30BP,TIMM50,RPUSD2,DYNLL1,EIF3G,ATOX1,LSM2,SNRPD2,ATP5F1A,SOD1,ATP5F1B,VPS11,GAPDH,RPL10A,ATG4B,BSG,SU…
Drug	ctd:D006830	Hydralazine	4.008e-22	1.026e-17	8.553e-19	9.176e-18	79	786	RPL26,RPL27,RPL31,RPL34,RPL37A,RPLP1,MRPS12,RPS4Y1,RPS9,RPS11,RPS12,NAA10,AKR1A1,SELENOW,COA3,SLC25A5,PSMG3,ZNF622,ANAPC11,CCT7,NAA38,TIMM50,DYNLL1,SNRPD2,ATP5ME,ATP6AP1,FAM241B,NDUFB2,NDUFB10,NDUFS5,RPL10A,NSFL1C,SNU13,NME1,TALDO1,ELOB,OAZ1,SERP2,TMED3,GUK1,FAM3A,PAFAH1B3,CD63,TMSB10,MFSD5,CDK4,TPI1,SNF8,UBE2L6,PARK7,COPE,PHB,UBA52,MYL6B,SAMM50,TRAPPC6A,TOMM7,RPL36,IFT22,COX6B1,POLR2L,POLE4,IDH3…
Drug	ctd:D005897	Glafenine	4.077e-21	1.044e-16	8.031e-18	8.615e-17	105	1327	POP7,RPL28,RPL29,RPL34,CDK2AP2,RPLP0,RPLP1,RPLP2,RPN1,RPN2,RPS3,RPS5,RNF181,MAEA,RPS9,RPS11,RPS12,NAA10,ACTG1,RPS16,LAGE3,RPS24,AKR1A1,TMEM222,AHCY,ALAS1,SEC13,NOP56,MED29,ADCK5,APEX1,CHCHD6,DRAP1,NAA38,APRT,NHP2,ELOF1,NPRL2,PHPT1,TCF25,CNPY3,DYNLL1,CHID1,EIF3I,SNRPD2,SOD1,GAPDH,OST4,FAM241B,SSR4,SMIM4,RPL10A,BLVRB,YIF1A,FASTK,NFKBIB,MYDGF,ERP29,EBNA1BP2,NME1,TMEM258,ELOB,TUBA1C,GPX1,RNF25,RPL14,…
Drug	ctd:D018120	Finasteride	6.77e-20	1.734e-15	1.238e-16	1.328e-15	86	989	CLPP,MRPS12,ECSIT,PEF1,MAD2L2,ZNHIT1,PFDN6,STOML2,CREB3,LCMT1,NAGK,COA3,MED29,CHCHD5,R3HCC1,COMMD5,CHCHD6,NUDT16L1,NAA38,NHP2,AHSA1,GADD45GIP1,TRUB2,MSRB2,RUVBL1,MANBAL,CCT5,DYNLL1,LSM2,EXOSC7,TRAPPC2L,AUP1,FAM241B,BCS1L,CHMP2A,NDUFV3,BLVRB,NSFL1C,NFKBIB,AP1M1,NME1,NSMCE1,WDR45,TKT,PRDX1,LSM10,MFSD5,CFL1,ACOT7,PFDN1,PHB,TXN,TBCB,UFD1,KXD1,EXOSC4,PMM1,MRPL55,NDUFAF3,POLR2F,POLR2I,RBM42,POLE4,MRPL1…
Drug	CID000135411	CD437	1.297e-16	3.32e-12	2.213e-13	2.375e-12	34	203	RPL36AL,RPLP1,RPLP2,RPS15,NOP10,AKR1B1,STOML2,SLC25A4,EIF3G,SNRPD2,ATP5F1A,SOD1,ATP5F1B,ATP5PO,NDUFB9,BANF1,TMEM258,CORO1A,TMSB10,RPL35,RPL13A,CDK4,AP2M1,AP2S1,UQCRH,TOMM7,PSMD3,RPS2P55,SEM1,ARPC2,TIMM8B,ENO1,RPL8,RPL19
Drug	CID000000238	laevadosin	1.475e-15	3.777e-11	2.36e-12	2.532e-11	114	1800	RPS3,RPS4Y1,RPS5,RPS6,RPS8,RPS9,ACTB,RPS11,RPS12,RPS14,RPS15,ACTG1,RPS16,RPS18,RPS21,RPS24,RPS28,RPS29,MDH2,POLR1H,TUBB3,FARSA,FAU,CREB3,STK25,FOXRED1,NAGK,SLC25A4,NELFCD,ANAPC11,CCT7,NHP2,RPS10P3,CCT5,DYNLL1,EIF3C,EIF3G,EIF3H,EIF3I,ATP5F1A,ATP5F1B,ATP5MC2,ATP5ME,ATP6V0B,ATP6AP1,ATP5PO,GAPDH,NDUFB2,BCS1L,NDUFB8,NDUFB10,NDUFV1,NDUFS8,NDUFV3,RPS3AP47,STK19,MOCS3,FASTK,NFKBIB,EIF3K,SNU13,AP1M1,NME1,…
Drug	ctd:D007213	Indomethacin	2.865e-15	7.336e-11	4.316e-12	4.63e-11	105	1605	CLPP,RABEPK,RPL27,RPL30,RPL27A,RPL28,CTU2,RPL34,RPL38,RPLP2,RPS3,RPS5,MAEA,RPS9,RPS12,RPS16,RPS18,RPS24,ECSIT,POLR1H,PEMT,TMEM147,AKR1B1,NELFCD,NTMT1,ANAPC11,CCDC12,YIF1B,SPINT2,UQCC3,SAP30BP,TCF25,ATOX1,SNRPD2,LSM7,SOD1,ATP5ME,VPS11,NDUFA8,NDUFB2,NDUFB10,NDUFS3,NDUFS5,RPL10A,ZMAT5,MOCS3,MED22,IMP4,NFKBIB,MYDGF,NME1,TCEA2,RPL14,GSS,SLC2A6,DCTN3,CDK4,PARK7,ACOT7,PFDN1,PFDN5,TRAPPC1,PHB,TXN,UBA52,G…
Drug	2042_DN	Chlortetracycline hydrochloride [64-72-2]; Down 200; 7.8uM; HL60; HG-U133A	7.359e-14	1.884e-09	1.047e-10	1.123e-09	30	194	RABEPK,POP7,MRPS12,FARSA,PEMT,PPME1,MPG,TRMT1,FASTK,ILVBL,HTRA2,ADRM1,ERG28,TBRG4,COPE,NCAPH2,PHB,PIN1,EXOSC4,NRBP1,PPP4C,PSMD8,PSMD11,TMEM161A,DRG2,EMC9,RHOT2,NKIRAS2,JPT1,VPS28
Drug	ctd:D008767	Methylmercury Compounds	1.411e-13	3.614e-09	1.902e-10	2.041e-09	67	851	RPL26,RPL27,RPL34,RPL37,RPL38,RPLP0,RPLP1,RPLP2,RPN1,RPS3,RPS8,RPS15,ACTG1,RPS24,TUBB3,RACK1,AHCY,PPME1,ALAS1,ALDOC,SDF2,SELENOW,NOP56,SLC25A4,SLC25A5,APRT,ERGIC3,ASMTL,EIF3H,ATP5F1A,SOD1,ATP6V0B,ATP5PO,GAPDH,BLVRB,PMPCA,BSG,TALDO1,GPS1,GPX1,GPX4,PRDX2,PRPF4,RPL13A,CFL1,LYPLA2,PARK7,PHB2,HMOX2,PFKM,TXN,UBC,AP2M1,UCHL1,PIN1,PRMT1,UQCRH,RPL36,CSTB,SF3B5,PSMB6,PSMB7,PSMC5,DDOST,ECHS1,RNH1,RPL7A
Drug	ctd:D014303	Trinitrotoluene	1.631e-13	4.177e-09	2.089e-10	2.241e-09	37	302	RPL28,RPL29,RPN1,RPS5,MRPL27,AKR1A1,TUBB3,TMEM147,ZNHIT1,APEX1,CHCHD6,DRAP1,SPG7,GAPDH,FXYD6,RPL10A,ERP29,TARBP2,GPS1,GPX4,AIP,GSS,TMED3,SNF8,COPE,EIPR1,TRAPPC1,PHB,TBCB,UFD1,SAMM50,IDH3G,MRPL14,MRPL41,ZDHHC4,TIMM13,SLC35B1
Drug	ctd:D015647	2,3,4,5-Tetrahydro-7,8-dihydroxy-1-phenyl-1H-3-benzazepine	2.401e-13	6.148e-09	2.928e-10	3.141e-09	27	163	ACTB,AKR1A1,MDH2,ALDOC,AKR1B1,SEC13,OTUB1,SIRT2,CCT5,ATP5F1A,GAPDH,NDUFV1,NME1,PRDX2,CORO1A,TPI1,CFL1,ACOT7,TUFM,PHB,PIN1,PRDX5,PPP1CA,PSMB6,PSMB7,EEF1B2,ENO1
Drug	ctd:C013418	bromfenacoum	3.204e-13	8.204e-09	3.729e-10	4.001e-09	56	645	RPL34,RPLP0,RPS3,RPS8,RPS9,ACTB,RPS11,RPS16,RPS21,RPS28,MDH2,RACK1,PPME1,PFDN6,FLOT2,TIMM50,EIF3G,ATOX1,LSM7,SOD1,EDF1,ATP5PO,BRK1,C12orf57,NDUFB8,NDUFS3,NDUFV3,PMPCA,BSG,TALDO1,ATP6V0D1,RPL13A,PHB2,PFDN1,TUFM,PHB,TXN,SAMM50,PICK1,PMM1,NDUFB11,COX6B1,ZNF428,MRPS26,PSMC4,PSMD11,DBI,IVD,DRG2,FIS1,UBXN1,TIMM13,TIMM8B,RNH1,ENO1,RPL18
Drug	CID000000928	reduced diphosphopyridine nucleotide	3.645e-13	9.333e-09	4.058e-10	4.353e-09	39	342	RPS5,AKR1A1,MDH2,AHCY,ALDOC,AKR1B1,SOD1,GAPDH,NDUFA8,NDUFB2,NDUFB7,NDUFB8,NDUFB9,NDUFB10,NDUFS3,NDUFV1,NDUFS5,NDUFS8,NDUFV3,BLVRB,PRDX2,GCAT,TKT,HSD17B10,HMOX2,PFKM,GRHPR,UQCRC1,UQCRH,UROD,NDUFB11,POR,IDH3B,IDH3G,NDUFS7,IVD,ACOT8,ECHS1,NOSIP
Drug	ctd:C066340	tolcapone	4.073e-13	1.043e-08	4.346e-10	4.662e-09	38	327	RPS11,RPS14,LAGE3,RPS21,RPS24,POLR1H,NOP56,SLC25A4,SLC25A5,SLC25A6,CCT7,EBP,DYNLL1,LSM7,TRAPPC2L,SOD1,ATP5F1B,ATP5ME,ATP5PO,JAGN1,NDUFS5,RPL10A,TXNDC17,MFSD5,PFDN1,PFDN5,TOMM7,ATP5MF,MRPL14,CSTB,MRPL40,ROMO1,PSMC5,DDOST,MRPL20,ECHS1,TIMM8B,RPL7A
Drug	2000_DN	Tolazoline hydrochloride [59-97-2]; Down 200; 20.4uM; HL60; HG-U133A	5.339e-13	1.367e-08	5.468e-10	5.866e-09	29	195	MRPS12,FARSA,AHSA1,GADD45GIP1,EBP,LSM7,USE1,RUVBL2,FASTK,EIF2B3,MLST8,ELOB,NTHL1,GPS1,TBRG4,HSPBP1,PFKM,TBCB,POLR2F,IDH3G,PSMC3,EXOSC5,TMEM161A,COG7,RHOT2,MRPS18A,MRPL4,RNH1,ENO1
Drug	ctd:C049584	2-amino-1-methyl-6-phenylimidazo(4,5-b)pyridine	8.159e-13	2.089e-08	8.035e-10	8.62e-09	50	545	RPL26,RPL27A,RPL28,RPL37A,RPLP0,RPLP1,RPLP2,RPS3,RPS5,RPS6,ACTB,RPS11,RPS14,RPS15,ACTG1,RPS24,RPS29,MDH2,RACK1,NOP10,SLC25A4,SLC25A5,CCT7,APRT,SPINT2,CCT5,ATP5F1B,RPL10A,GPX4,PRDX2,GSS,CORO1A,PEBP1,TKT,HSD17B10,RPL35,RPL13A,CDK4,PHB,PKM,RPL36,POR,PSMB2,PSMB6,DBI,SEM1,ENO1,RPL8,RPL13,RPL19
Drug	ctd:C074702	chromium hexavalent ion	8.688e-13	2.225e-08	8.24e-10	8.84e-09	95	1514	RPL26,RPL30,RPL27A,RPL29,RPL31,RPL34,RPL36AL,RPL37,RPLP0,RPN1,RPS3,RPS5,RPS6,RPS8,RPS9,RPS12,RPS15,NAA10,RPS21,RPS24,RPS28,FANCG,FARSA,TMEM147,NOP10,AKR1B1,NOP56,PSMG3,ADCK5,SIVA1,CCT7,CHCHD6,CMSS1,NHP2,GADD45GIP1,SIRT2,PHPT1,RUVBL1,TIMM50,DYNLL1,EIF3C,EIF3I,SNRPD2,LSM7,ATP5F1A,SOD1,JAGN1,BCS1L,NDUFS3,RPL10A,NME1,GPX1,GPX4,RPL14,PRDX1,TMSB10,HSD17B10,RPL35,RPL13A,CDC25B,CDK4,UBE2L6,PARK7,PEPD,HSP…
Drug	ctd:D018038	Sodium Selenite	2.573e-12	6.588e-08	2.353e-09	2.524e-08	94	1519	CLPP,RABEPK,RPL30,RPL28,RPL29,RPL32,RPL36AL,RPL37A,RPLP0,RPLP2,RPS3,RPS5,ACTB,RPS15,RPS16,SCAND1,ECSIT,NRN1,TMEM205,LCMT1,SELENOW,SLC25A5,WDR83,APEX1,ANAPC11,APRT,NPRL2,YIF1B,RUVBL1,THYN1,ORMDL2,NXT1,EIF3H,SOD1,ATP5MC2,AUP1,CHMP2A,NDUFB10,NDUFS3,NDUFS5,RPL10A,PMPCA,SNU13,GPX1,GPX4,TXNDC17,RPL14,AIP,CCDC167,PRDX1,LSM10,CDK4,CETN2,CFL1,PARK7,PFDN5,HMOX2,TUFM,TXN,UBA52,UFD1,CLTA,TSEN34,UQCRC1,TMEM22…
Drug	ctd:C039060	dihydroartemisinin	8.586e-12	2.199e-07	7.581e-09	8.133e-08	20	100	RPS5,RPS6,RPS8,RPS9,ACTG1,RPS18,RPS28,SNRPD2,ATP5F1A,SOD1,ATP5PO,GAPDH,RPL14,PRDX1,RPL35,TPI1,CFL1,PKM,ENO1,RPL18
Drug	CID000005102	NSC115907	1.187e-11	3.04e-07	1.013e-08	1.087e-07	32	266	RPS3,MDH2,FOXRED1,SLC25A4,SLC25A5,SLC25A6,SGTA,SNCG,SOD1,ATP5F1B,ATP5ME,GAPDH,NDUFA8,NDUFB9,NDUFS3,NDUFV1,NDUFS8,NDUFV3,PARK7,PFKM,TXN,COX6A1P2,UQCRC1,UQCRH,PRDX5,TXN2,HSP90AA2P,COX4I1,COX6B1,ATP5MF,NDUFS7,TIMM13
Drug	1373_DN	Clindamycin hydrochloride [21462-39-5]; Down 200; 8.6uM; HL60; HG-U133A	2.118e-11	5.423e-07	1.749e-08	1.877e-07	27	196	RABEPK,TMEM222,FARSA,PPME1,MPG,NAGK,SGTA,APRT,USE1,BCAT2,ILVBL,HTRA2,ERG28,TBRG4,COPE,NCAPH2,PIN1,EXOSC4,C11orf49,NRBP1,PSMD8,TMEM161A,COMMD4,EMC9,RHOT2,VPS28,DCXR
Drug	CID000119058	AC1L3O4T	2.458e-11	6.294e-07	1.967e-08	2.11e-07	30	242	MRPS12,RPS9,MDH2,UQCRHL,STOML2,SLC25A4,SOD1,ATP5F1B,NDUFA8,NDUFB2,BCS1L,NDUFB7,NDUFB8,NDUFB9,NDUFB10,NDUFS3,NDUFV1,NDUFS5,NDUFS8,NDUFV3,BLVRB,PHB,UQCRC1,UQCRH,UROD,NDUFB11,NDUFS7,TIMM8B,COQ4,RPL19
Drug	CID000000197	AdPK	4.111e-11	1.053e-06	3.19e-08	3.422e-07	92	1548	RPS3,RPS4Y1,RPS5,RPS6,RPS8,RPS9,ACTB,RPS11,RPS12,RPS14,RPS15,ACTG1,RPS16,RPS18,RPS21,RPS24,RPS28,RPS29,MDH2,TUBB3,FAU,AHCY,ACTL6B,STK25,NAGK,ANAPC11,CCT7,RPS10P3,RUVBL1,CCT5,DYNLL1,EIF3C,EIF3G,EIF3H,EIF3I,EXOSC7,ATP5F1A,ATP5F1B,ATP5MC2,ATP5ME,ATP6V0B,ATP6AP1,ATP5PO,SPG7,NDUFB2,NDUFB10,NDUFV3,RPS3AP47,STK19,FASTK,NFKBIB,EIF3K,AP1M1,NME1,MLST8,XRCC6P2,TUBA1C,GSS,ATP6V0D1,PRPF4,GUK1,CD63,CDC25B,DCTN…
Drug	CID000000612	lactate	7.275e-11	1.863e-06	5.479e-08	5.877e-07	42	461	CLPP,RPL37A,RPLP0,MDH2,ALDOC,AKR1B1,SLC25A4,ATP5F1A,ATP5F1B,GAPDH,BCAT2,BCS1L,NDUFS3,NDUFV1,NDUFS8,BSG,SNU13,TALDO1,ILVBL,TKT,HSD17B10,HAGH,RPL13A,PFKM,TUFM,COX6A1P2,CPT1C,PKM,UQCRC1,UQCRH,UROD,COX4I1,COX6B1,IDH3B,IDH3G,NDUFS7,EEF1B2,MRPS2,RPL26L1,ENO1,RPL8,RPL19
Drug	3546_DN	Leucomisine [17946-87-1]; Down 200; 16.2uM; MCF7; HT_HG-U133A	1.044e-10	2.672e-06	7.634e-08	8.19e-07	26	195	CDK2AP2,MRPS12,LAGE3,BCAS4,GADD45GIP1,AUP1,USE1,MOCS3,SURF2,ERG28,FAM3A,ACOT7,TWF2,AP2S1,TXN2,TMUB2,RBM42,FSD1,PSMB2,C20orf27,SLC52A2,DRG2,SLC35C2,RHOT2,ZDHHC4,QTRT1
Drug	ctd:D010433	Pentylenetetrazole	1.841e-10	4.713e-06	1.309e-07	1.404e-06	26	200	RPL26,RPL27,RPL30,RPL27A,RPL28,RPL31,RPL32,RPL37A,RPL38,RPS3,RPS8,MRPL27,RPS29,MDH2,FAU,SOD1,BSG,ELOB,MRPL14,MRPS26,MRPS11,DBI,COG7,MRPL2,MRPS2,RPL13
Drug	ctd:D005001	Ethionine	2.332e-10	5.971e-06	1.614e-07	1.731e-06	32	298	CLPP,RPL32,RPN2,RPS6,RPS8,RPS14,RPS18,AKR1A1,LCMT1,ALKBH7,NAA38,GAPDH,NDUFS5,NDUFV3,ERP29,GPX1,GPX4,PRDX2,TXN,UBA52,AP2M1,UFD1,COX4I1,PSMB3,PSMC3,PSMC5,DBI,ECHS1,MRPL2,ENO1,DCXR,RPL13
Drug	CID000447920	ubiquinols	2.427e-10	6.215e-06	1.636e-07	1.755e-06	18	95	SLC25A4,NDUFB2,NDUFB7,NDUFB8,NDUFB9,NDUFB10,NDUFS3,NDUFV1,NDUFS5,NDUFS8,NDUFV3,COX6A1P2,UQCRC1,UQCRH,UROD,COX4I1,COX6B1,NDUFS7
Drug	CID000001062	AC1L1AN5	2.859e-10	7.322e-06	1.861e-07	1.997e-06	26	204	MDH2,UQCRHL,SOD1,ATP5F1B,NDUFA8,NDUFB2,BCS1L,NDUFB7,NDUFB8,NDUFB9,NDUFB10,NDUFS3,NDUFV1,NDUFS5,NDUFS8,NDUFV3,ERP29,COX6A1P2,UQCRC1,UQCRH,UROD,NDUFB11,COX4I1,COX6B1,POR,NDUFS7
Drug	ctd:C063855	microcystin RR	2.908e-10	7.445e-06	1.861e-07	1.997e-06	18	96	AHSA1,PHPT1,TIMM50,SOD1,EIF2B3,ERP29,TALDO1,CDK4,TXN,TBCB,UFD1,PPP2R1A,PSMB2,PSMB3,PSMB6,CIAPIN1,ECHS1,NUTF2
Drug	ctd:D014050	Toluene	3.713e-10	9.508e-06	2.319e-07	2.488e-06	55	751	RPL37,RPL37A,RPS28,MEA1,NOP10,SLC25A4,TMEM134,SIVA1,DRAP1,CIAO2B,ATOX1,SNRPD2,LSM7,TRAPPC2L,ATP5F1A,SOD1,ATP5F1B,ATP5ME,OST4,NDUFA8,NDUFB2,NDUFB7,NDUFB8,NDUFB9,DPM2,NDUFS3,NDUFS5,NDUFS8,NDUFV3,ZMAT5,TMEM258,HTRA2,GPX4,GSS,PAFAH1B3,HSD17B10,PARK7,PFDN1,PFDN5,UBB,UBC,AP2M1,AP2S1,PRDX5,TXN2,NDUFB11,COX4I1,COX6B1,POR,PRKCZ,NDUFS7,DBI,EMC9,MRPL52,DCXR
Drug	ctd:D013605	T-2 Toxin	5.923e-10	1.517e-05	3.611e-07	3.874e-06	35	362	RPLP2,ACTB,RPS21,ALDOC,STOML2,APRT,EIF3G,EIF3I,ATP5F1A,SOD1,ATP5F1B,GAPDH,RUVBL2,NDUFS3,ERP29,TALDO1,TUBA1C,GPX1,GSS,PKIG,TKT,TPI1,CFL1,PARK7,COPE,TUFM,PHB,UCHL1,PKM,COX4I1,PRKCZ,PSMB3,PSMB7,EIF6,ENO1
Drug	ctd:C080703	SK&F 83959	6.669e-10	1.708e-05	3.971e-07	4.26e-06	22	153	ACTG1,MDH2,ALDOC,SIRT2,ATP5F1A,ATP5F1B,GAPDH,CHMP2A,BLVRB,NSFL1C,NME1,CORO1A,DCTN3,TPI1,CFL1,TUFM,UCHL1,CLTA,IDH3G,PPP1CA,PPP2R1A,ECHS1
Drug	ctd:C049325	1,2-dithiol-3-thione	6.841e-10	1.752e-05	3.981e-07	4.271e-06	58	829	RPL28,RPLP0,RPN1,RPS12,RPS15,RPS24,AKR1A1,TUBB3,RACK1,STK25,SLC25A4,APEX1,CCT7,CHCHD6,EBP,EIF3C,ATP6AP1,ATP5PO,GAPDH,NDUFB8,ERP29,MMS19,MLST8,GSS,CORO1A,PEBP1,TKT,PRDX1,CD63,TMSB10,RPL35,CFL1,PHB,TXN,UBA52,AP2S1,MYL6B,TXN2,STX8,RPL36,COX6B1,POR,CSTB,PSMA7,PSMB2,PSMB3,PSMB6,PSMB7,PSMD7,PSMD8,EIF6,IVD,FIS1,ECH1,NUTF2,ENO1,RPL7A,RPL13
Drug	CID000000710	riboflavin 5'-phosphate	1.05e-09	2.689e-05	5.975e-07	6.41e-06	23	171	CLPP,POP7,RPS3,FOXRED1,GAPDH,NDUFB2,NDUFB7,NDUFB8,NDUFB9,NDUFB10,NDUFS3,NDUFV1,NDUFS5,NDUFS8,NDUFV3,BLVRB,UQCRC1,UQCRH,UROD,HSP90AA2P,POR,NDUFS7,NOSIP
Drug	ctd:D020111	Chlorodiphenyl (54% Chlorine)	1.231e-09	3.153e-05	6.854e-07	7.353e-06	93	1678	RPL27A,RPL28,RPL31,RPL37A,RPLP1,RPS3,ACTB,RPS14,NAA10,RPS16,RPS21,RPS28,MDH2,PEMT,TMEM147,MCRS1,ZNHIT1,CREB3,MPG,LAMTOR2,NOP56,SLC25A4,ALKBH7,COMMD5,APEX1,ANAPC11,SIVA1,NUDT16L1,NHP2,GADD45GIP1,PHPT1,CCT5,TCF25,EIF3C,SNRPD2,TRAPPC2L,SOD1,ATP5F1B,ATP5ME,ATP6V0B,GAPDH,CENPX,C12orf57,NDUFB2,NDUFS5,EBNA1BP2,NSMCE1,GPX1,GPX4,TXNDC17,OAZ1,GUK1,TKT,HSD17B10,RPL13A,CDC25B,TBRG4,CFL1,PHB2,NCAPH2,HSPBP1,UB…
Drug	ctd:D020888	Vigabatrin	1.371e-09	3.509e-05	7.467e-07	8.01e-06	17	93	RPL26,RPL27,RPL30,RPL27A,RPL31,RPL32,RPL37A,RPL38,RPS3,RPS8,MRPL27,RPS29,SOD1,BSG,ELOB,MRPL2,RPL13
Drug	6912_DN	PF-00562151-00 [351320-12-2]; Down 200; 10uM; MCF7; HT_HG-U133A	1.663e-09	4.259e-05	8.873e-07	9.519e-06	24	190	MRPS12,ACTB,FARSA,SPG7,GAPDH,DPM2,ZMAT5,ERG28,PRPF4,TKT,COPE,AP2S1,DDA1,PIN1,PEX16,PRMT1,PPP1CA,PSMC3,PSMD3,DRG2,ARPC2,MRPS18A,MLF2,ENO1
Drug	ctd:D026023	Permethrin	2.16e-09	5.531e-05	1.129e-06	1.211e-05	27	240	RPL32,RPLP2,RPS6,MDH2,MRPL28,ATP5F1A,SOD1,ATP5F1B,ATP6AP1,NDUFA8,CHMP2A,NDUFV1,NDUFS8,GPX1,GPX4,PRDX2,GCAT,PRDX1,PARK7,UBA52,UQCRC1,PRDX5,MRPL55,POLR2H,NDUFS7,CCS,MRPS18A
Drug	ctd:D001553	Benzbromarone	2.239e-09	5.734e-05	1.147e-06	1.23e-05	32	326	CLPP,RPL32,RPN2,RPS6,RPS8,RPS14,RPS18,AKR1A1,LCMT1,ALKBH7,NAA38,GAPDH,NDUFS5,NDUFV3,ERP29,GPX1,GPX4,PRDX2,TXN,UBA52,AP2M1,UFD1,COX4I1,PSMB3,PSMC3,PSMC5,DBI,ECHS1,MRPL2,ENO1,DCXR,RPL13
Drug	CID000000888	magnesium	2.379e-09	6.091e-05	1.194e-06	1.281e-05	78	1326	CLPP,POP7,RPL37A,RPLP0,MRPS12,RPS5,ACTB,RPS14,MRPL27,RPS15,ACTG1,MDH2,MEA1,TUBB3,FARSA,ACTL6B,NAGK,SLC25A4,SLC25A5,SLC25A6,APEX1,CCT7,APRT,CCT5,DYNLL1,ATP5F1A,SOD1,ATP5F1B,ATP5PO,SPG7,TUBBP1,SNU13,EEF1A1P9,NME1,TALDO1,ILVBL,NTHL1,TUBA1C,GSS,TKT,RPL13A,PEPD,PFDN5,PFKM,ARFIP2,TUFM,MYL6B,PKM,UROD,TXN2,HSP90AA2P,PMM1,POLR2F,COX6B1,POLR2H,POLR2I,POLR2L,IDH3B,IDH3G,MRPS11,PRKCZ,ENDOV,PSMB3,PSMB6,PSMB7,…
Drug	614_DN	monastrol; Down 200; 20uM; MCF7; HG-U133A	3.126e-09	8.006e-05	1.54e-06	1.652e-05	24	196	NOP10,SIVA1,CCT7,ATOX1,ATP6AP1,BSG,EIF2B3,MYDGF,EIF3K,SNU13,ERP29,GPS1,DCTN3,SNF8,COPE,HSPBP1,NDUFB11,MRPS11,PSMB2,DEF8,PSMC3,DDOST,SEM1,VPS28
Drug	ctd:C472791	3-(4'-hydroxy-3'-adamantylbiphenyl-4-yl)acrylic acid	3.753e-09	9.61e-05	1.807e-06	1.939e-05	46	607	RABEPK,RPL29,RPL32,RPL36AL,RPLP1,ACTB,RPS15,AKR1B1,SLC25A6,DYNLL1,EIF3G,EIF3I,SNRPD2,ATP5F1A,SOD1,ATP5F1B,ATP5ME,NDUFB9,BANF1,NDUFS5,ZMAT5,NME1,TMEM258,TMSB10,DCTN3,CDK4,CFL1,PFDN5,TXN,UBA52,AP2M1,AP2S1,TRIR,PIN1,UQCRH,TOMM7,PSMD3,PSMD11,SEM1,ARPC2,NOSIP,TIMM8B,ENO1,RPL8,RPL13,RPL19
Drug	CID000002021	NSC248616	3.811e-09	9.759e-05	1.807e-06	1.939e-05	16	87	RPL29,RPL32,MRPS12,RPS3,RPS5,RPS12,RPS14,RPS10P3,RPL14,TUFM,RPL14P1,UROD,MRPS11,RPS2P55,MRPS2,RPL19
Drug	1393_DN	Nocodazole [31430-18-9]; Down 200; 13.2uM; HL60; HG-U133A	4.456e-09	0.0001141	2.075e-06	2.226e-05	23	184	RABEPK,FARSA,TRMT1,SIVA1,AHSA1,RUVBL1,EXOSC7,TRAPPC2L,CENPX,USE1,RUVBL2,PMPCA,EIF2B3,EBNA1BP2,MLST8,NTHL1,ERG28,HMOX2,EXOSC4,POLR2F,EXOSC5,TMEM161A,MRTO4
Drug	ctd:D003976	Diazinon	5.4e-09	0.0001383	2.469e-06	2.649e-05	85	1525	RPS5,RNF181,APBB3,RPS16,RACK1,TMEM147,MCRS1,FLOT2,WDR83,TRMT1,APEH,NSUN5,SIRT2,PHPT1,ERGIC3,SNCG,LSM7,SOD1,EDF1,GAPDH,CENPX,AUP1,NDUFB10,YIF1A,FASTK,EIF3K,AP1M1,ERP29,ADRM1,GPX1,GPX4,TXNDC17,PRDX2,GCAT,TKT,PAFAH1B3,TMSB10,HAGH,CDK4,CFL1,PARK7,TRIR,MAGED4,DDA1,UCHL1,PIN1,PRMT1,UROD,EXOSC4,PICK1,ABHD14A,CCDC28B,NDUFAF3,POLR2F,POLR2L,ELOVL1,IDH3B,IDH3G,PAF1,PPP4C,PPP5C,CSTB,PRKCZ,PSMB2,DAD1,PSMC4,PS…
Drug	ctd:D010695	Phlorhizin	6.101e-09	0.0001562	2.741e-06	2.94e-05	26	235	ACTB,AKR1A1,CCT7,ATP5F1A,SOD1,NDUFS5,NDUFS8,HTRA2,GPX1,PRDX1,HSD17B10,PARK7,TXN,UBB,UBC,SLC35A2,PRDX5,TXN2,IDH3B,IDH3G,PSMB2,PSMC4,PSMD7,IVD,FIS1,ECHS1
Drug	ctd:D064730	Dexrazoxane	6.495e-09	0.0001663	2.868e-06	3.076e-05	20	143	ALAS1,SLC25A5,ATP5F1A,ATP5F1B,ATP5PO,NDUFA8,NDUFB2,NDUFB7,NDUFB8,NDUFV1,CPT1C,UQCRH,COX4I1,COX6B1,ATP5MF,IDH3B,NDUFS7,IVD,ECH1,COQ4
Drug	DB00157	NADH	7.341e-09	0.000188	3.186e-06	3.418e-05	20	144	MDH2,AKR1B1,GAPDH,NDUFA8,NDUFB2,NDUFB7,NDUFB8,NDUFB9,NDUFB10,NDUFS3,NDUFV1,NDUFS5,NDUFS8,NDUFV3,BLVRB,HSD17B10,HMOX2,IDH3B,IDH3G,NDUFS7
Drug	6920_DN	AG-012559 [369370-06-9]; Down 200; 10uM; PC3; HT_HG-U133A	7.497e-09	0.000192	3.199e-06	3.432e-05	23	189	MRPS12,ACTB,FARSA,GAPDH,DPM2,ZMAT5,NSFL1C,AIP,ERG28,PRPF4,TKT,ACOT7,AP2S1,DDA1,PPP1CA,PSMC3,DDOST,DRG2,ARPC2,MRPS18A,MLF2,ARFRP1,ENO1
Drug	1413_DN	Pyrantel tartrate [33401-94-4]; Down 200; 11.2uM; HL60; HG-U133A	1.015e-08	0.00026	4.262e-06	4.572e-05	23	192	CDK2AP2,NAA10,PPME1,NDUFS8,MLST8,HTRA2,GPS1,ATP6V0D1,PAFAH1B3,TBRG4,COPE,PIN1,PEX16,UQCRC1,EXOSC4,YIPF3,PPP5C,INTS11,C20orf27,RABGGTA,RHOT2,MRPL4,RNH1
Drug	ctd:D014415	Tunicamycin	1.095e-08	0.0002804	4.523e-06	4.852e-05	86	1574	RPL29,RPL37,CDK2AP2,MRPS12,RPN1,RNF181,ACTG1,MCRIP1,TMEM205,HMGB1P1,TUBB3,ALDOC,LCMT1,SEC13,SLC25A4,COMMD5,WDR83,ZNF622,ANAPC11,AHSA1,GADD45GIP1,MSRB2,SLC25A39,NXT1,TCF25,SOD1,SPG7,USE1,FXYD6,SSR4,NDUFB2,BCS1L,NDUFB8,BANF1,NDUFS5,STK19,PMPCA,BSG,MYDGF,LMAN2,NME1,MPV17L2,TUBA1C,CCDC167,CORO1A,WDR45,GCAT,PEBP1,SLC2A6,PAFAH1B3,TMSB4XP8,TMSB10,TPI1,CFL1,ACOT7,TRAPPC1,PHB,TXN,CPT1C,SLC35A2,PGAM4,PKM,S…
Drug	2001_DN	Tolnaftate [2398-96-1]; Down 200; 13uM; HL60; HG-U133A	1.238e-08	0.0003171	5.033e-06	5.4e-05	23	194	ACTB,STK25,NAGK,GADD45GIP1,LSM7,SPG7,USE1,FASTK,AIP,GSS,PAFAH1B3,IDH3B,IDH3G,RNF113A,PSMC3,TMEM161A,C20orf27,COG7,DMAC2,SLC35C2,RHOT2,PQBP1,ENO1
Drug	5327_DN	Benfluorex hydrochloride [23642-66-2]; Down 200; 10.4uM; MCF7; HT_HG-U133A	1.366e-08	0.0003498	5.466e-06	5.864e-05	23	195	MRPS12,ACTB,MDH2,MPG,SIVA1,MRPL28,APRT,BCAS4,USE1,HTRA2,ERG28,HAGH,MFSD5,ACOT7,AP2S1,POLR2L,PPP2R1A,PPP5C,SLC35C2,RHOT2,NUTF2,QTRT1,ENO1
Drug	6905_DN	Orlistat; Down 200; 10uM; MCF7; HT_HG-U133A	1.506e-08	0.0003857	5.934e-06	6.366e-05	23	196	ACTB,FARSA,NOP56,GAPDH,DPM2,ZMAT5,AIP,ERG28,PRPF4,TKT,ACOT7,AP2S1,DDA1,PRMT1,IDH3B,PSMC3,DRG2,ARPC2,MRPS18A,MLF2,ARFRP1,QTRT1,ENO1
Drug	CID000000929	beta-NADP	1.589e-08	0.0004069	6.165e-06	6.614e-05	39	490	AKR1A1,MDH2,ALDOC,AKR1B1,PHPT1,SOD1,GAPDH,NDUFB2,NDUFB10,NDUFV1,NDUFV3,BLVRB,NSFL1C,EIF2B3,EIF2B2,TALDO1,ILVBL,ATP6V0D1,TKT,HSD17B10,TPI1,PFDN1,PFDN5,HMOX2,PFKM,TXN,GRHPR,PKM,UROD,PRDX5,TXN2,HSP90AA2P,POR,PORCN,IDH3B,IDH3G,NOSIP,ENO1,DCXR
Drug	CID000000925	coenzyme 1	1.796e-08	0.0004599	6.864e-06	7.364e-05	44	596	AKR1A1,MDH2,AHCY,ALDOC,AKR1B1,SIRT2,PHPT1,GAPDH,NDUFA8,NDUFB2,NDUFB7,NDUFB8,NDUFB9,NDUFB10,NDUFS3,NDUFV1,NDUFS5,NDUFS8,NDUFV3,BLVRB,XRCC6P2,PRDX2,GCAT,HSD17B10,TPI1,PFDN5,HMOX2,PFKM,TXN,GRHPR,PKM,UQCRC1,UQCRH,UROD,TXN2,NDUFB11,IDH3B,IDH3G,RPS19BP1,NDUFS7,IVD,ACOT8,ECHS1,DCXR
Drug	CID000002204	AC1L1D5O	1.88e-08	0.0004814	7.08e-06	7.595e-05	20	152	MDH2,UQCRHL,SLC25A4,SLC25A5,SLC25A6,VPS25,SOD1,BCS1L,CHMP2A,NDUFS8,SNF8,UQCRC1,UQCRH,UROD,PRDX5,COX6B1,NDUFS7,CHMP6,TIMM13,VPS28
Drug	CID000015938	paraquat	2.011e-08	0.0005149	7.462e-06	8.005e-05	23	199	CLPP,ACTB,ACTG1,MDH2,ACTL6B,APEX1,MSRB2,SOD1,GAPDH,NDUFV1,RPL10A,HTRA2,PRDX2,TKT,HMOX2,PIN1,UROD,PRDX5,TXN2,HSP90AA2P,POR,FSD1,CCS
Drug	ctd:D019328	Buthionine Sulfoximine	2.77e-08	0.0007094	1.013e-05	0.0001087	29	306	RPLP0,RPLP1,RPS6,RPS8,ACTB,RPS12,RPS14,RPS15,ALAS1,SELENOW,APEX1,EIF3G,SOD1,ATP5F1B,GAPDH,RPL10A,GPX1,GSS,PRDX1,TMSB10,TPI1,HMOX2,TXN,UBC,COX4I1,PPP5C,ECH1,EEF1B2,RPL8
Drug	ctd:D019284	Thapsigargin	2.856e-08	0.0007313	1.03e-05	0.0001105	76	1354	CLPP,POP7,RPL27A,RPL37,CDK2AP2,RPN1,RNF181,ACTG1,MCRIP1,HMGB1P1,TUBB3,ALDOC,SEC13,SLC25A4,MED29,WDR83,CHCHD6,NUDT16L1,MSRB2,SLC25A39,TCF25,CHID1,EIF3I,EXOSC7,ATP5F1A,USE1,BCAT2,SSR4,NDUFB8,NDUFB9,NDUFB10,BANF1,NDUFS5,NDUFS8,YIF1A,STK19,NFKBIB,MYDGF,MLX,CORO1A,WDR45,GCAT,SLC2A6,PRDX1,TMSB4XP8,TMSB10,HSD17B10,TPI1,CETN2,ACOT7,PHB,AP2M1,CPT1C,SLC35A2,PGAM4,PKM,SAMM50,UQCRC1,UQCRH,PRDX5,TXN2,TIMM22,Y…
Drug	ctd:D007657	Ketone Bodies	3.115e-08	0.0007977	1.108e-05	0.0001188	40	523	RPN2,RPS5,ACTB,MDH2,SDF2,NAGK,SLC25A4,NAA38,EIF3H,SOD1,ATP5F1B,EDF1,ATP6AP1,ATP5PO,SSR4,NDUFA8,NDUFB9,CHMP2A,EIF3K,MPV17L2,PRDX2,PEBP1,DCTN3,SNF8,ACOT7,PFDN1,PFDN5,AP2M1,AP2S1,UCHL1,SAMM50,NDUFB11,POLR2F,IDH3G,PSMC5,PSMD7,MRPL20,FIS1,ECH1,ARFRP1
Drug	CID000000724	3-phosphoglycerate	3.349e-08	0.0008576	1.175e-05	0.000126	17	114	MDH2,ALDOC,AKR1B1,MPG,SPINT2,GAPDH,GUK1,TKT,TPI1,PFKM,TRAPPC1,PGAM4,PKM,PMM1,CSTB,PSMC4,ENO1
Drug	ctd:C032036	bromobenzene	3.884e-08	0.0009946	1.344e-05	0.0001442	21	174	RPL27A,RPS8,ACTB,RPS11,EIF3C,SOD1,ERP29,GPX1,PEBP1,TMSB10,RPL35,TPI1,CFL1,PARK7,TXN,POR,PSMB3,PSMC3,PSMC4,PSMC5,PTMA
Drug	CID000000783	hydride	3.968e-08	0.001016	1.355e-05	0.0001453	54	835	AKR1A1,MDH2,AKR1B1,ATP5F1A,SOD1,ATP5F1B,ATP5MC2,ATP5ME,ATP6V0B,ATP6AP1,ATP5PO,GAPDH,NDUFA8,NDUFB2,NDUFB7,NDUFB8,NDUFB9,NDUFB10,NDUFS3,NDUFV1,NDUFS5,NDUFS8,NDUFV3,BLVRB,BSG,ILVBL,GSS,ATP6V0D1,HSD17B10,PFDN5,HMOX2,TXN,COX6A1P2,GRHPR,PKM,UQCRC1,UQCRH,UROD,TXN2,NDUFB11,COX4I1,COX6B1,POR,ATP5MF,IDH3B,IDH3G,PPP4C,CSTB,NDUFS7,RPL10P16,ACOT8,DOLPP1,ECHS1,DCXR
Drug	1416_DN	Chlorzoxazone [95-25-0]; Down 200; 23.6uM; HL60; HG-U133A	5.748e-08	0.001472	1.937e-05	0.0002078	22	194	POP7,PEMT,PPME1,MPG,NAGK,EIF3H,USE1,FASTK,ILVBL,HTRA2,ERG28,COPE,NCAPH2,PIN1,EXOSC4,C11orf49,NRBP1,TMEM161A,DRG2,EMC9,RHOT2,VPS28
Drug	ctd:C029892	cupric chloride	6.488e-08	0.001661	2.14e-05	0.0002296	44	623	RPL32,RPLP0,RNF181,ACTB,RPS15,SDF2,COMMD5,NUDT16L1,MSRB2,ATOX1,ATP5F1A,SOD1,GAPDH,BCAT2,BLVRB,TALDO1,ADRM1,TUBA1C,TKT,PRDX1,CD63,TRAPPC1,TXN,UBC,PIN1,UFD1,UROD,EXOSC4,ELOVL1,POR,IDH3G,CSTB,PSMB2,PSMB3,PSMB7,PSMC4,PSMD11,COMMD4,CCS,DRG2,MRPL2,MRPL4,ENO1,RPL18
Drug	CID000000703	flavin adenine dinucleotide sodium	6.518e-08	0.001669	2.14e-05	0.0002296	31	356	MDH2,FOXRED1,EIF3G,NDUFB2,NDUFB7,NDUFB8,NDUFB9,NDUFB10,NDUFS3,NDUFV1,NDUFS5,NDUFS8,NDUFV3,BLVRB,ILVBL,TKT,PFDN5,HMOX2,TXN,PKM,UQCRC1,UQCRH,UROD,PRDX5,TXN2,HSP90AA2P,POR,NDUFS7,IVD,ECHS1,NOSIP
Drug	CID000000784	H2O2	6.708e-08	0.001718	2.174e-05	0.0002333	68	1183	CLPP,RPS9,ACTB,ACTG1,AKR1A1,MDH2,FANCG,ACTL6B,AKR1B1,SLC25A4,APEX1,MSRB2,SIRT2,SPINT2,DYNLL1,SOD1,EDF1,ATP6V0B,ATP6AP1,GAPDH,NDUFA8,BCS1L,NDUFB7,NDUFB9,NDUFS3,NDUFV1,NDUFS8,NFKBIB,ERP29,MMS19,TALDO1,HTRA2,NTHL1,RNF25,TXNDC17,PRDX2,GSS,ATP6V0D1,TKT,PRDX1,RPL13A,PARK7,PFDN5,HMOX2,PHB,TXN,UBA52,UBB,UBC,PIN1,UQCRC1,UQCRH,UROD,PRDX5,TXN2,HSP90AA2P,POR,PPP1CA,PPP1R7,PPP2R1A,PRKCZ,NDUFS7,PSMC3,QARS1,CCS…
Drug	ctd:C002741	N-nitrosomorpholine	6.973e-08	0.001785	2.232e-05	0.0002394	30	338	RPLP0,ACTB,ACTG1,AHCY,APRT,CCT5,EIF3H,ATP5F1A,SOD1,ATP5F1B,GAPDH,BLVRB,ERP29,TUBA1C,PRDX2,GSS,CORO1A,PEBP1,PRDX1,TMSB10,SCFD2,PARK7,GRHPR,UFD1,PRDX5,RPL36,PSMC3,ECHS1,TMEM120A,ENO1
Drug	ctd:C030370	2-methoxy-5-(2',3',4'-trimethoxyphenyl)tropone	7.36e-08	0.001885	2.327e-05	0.0002496	29	320	RPL37,RPL37A,RPN2,RPS3,RPS6,ACTB,TUBB3,SLC25A4,MSRB2,ATP5MC2,SNU13,TUBA1C,GPX4,RPL13A,TBCB,UBA52,UBB,UBC,UCHL1,RPL36,IDH3B,PPP1R7,PSMC3,DBI,PTMA,ARPC2,NUTF2,RPL8,RPL13
Drug	CID000000753	glycerol	8.024e-08	0.002055	2.506e-05	0.0002688	53	830	CLPP,AKR1A1,MDH2,TUBB3,ALDOC,AKR1B1,NAGK,APEX1,AHSA1,ELOF1,SIRT2,LSM2,ATP5F1A,SOD1,ATP5F1B,GAPDH,BCAT2,TUBBP1,NDUFB9,CHMP2A,LMAN2,TALDO1,TUBA1C,PAFAH1B3,HSD17B10,HAGH,TPI1,SNF8,HMOX2,PFKM,CPT1C,PKM,PRMT1,UQCRC1,UQCRH,UROD,EXOSC4,POLR2F,COX6B1,POLR2H,POLR2L,IDH3B,IDH3G,PPP1CA,PRKCZ,PSMD8,ERAL1,RPS2P55,CCS,RNH1,COQ4,VPS28,ENO1
Drug	CID000098928	N-acetyl-4-thiazolidinecarboxylic acid	9.162e-08	0.002346	2.827e-05	0.0003032	10	38	NAA10,TRMT1,LSM2,RPL35,PSMC4,PSMC5,PSMD3,PSMD7,PSMD11,ARFRP1
Drug	ctd:D009853	Omeprazole	9.813e-08	0.002513	2.991e-05	0.0003209	32	382	CLPP,RPL32,RPN2,RPS6,RPS8,RPS14,RPS18,AKR1A1,LCMT1,ALKBH7,NAA38,GAPDH,NDUFS5,NDUFV3,ERP29,GPX1,GPX4,PRDX2,TXN,UBA52,AP2M1,UFD1,COX4I1,PSMB3,PSMC3,PSMC5,DBI,ECHS1,MRPL2,ENO1,DCXR,RPL13
Drug	ctd:D008344	Maneb	1.028e-07	0.002631	3.096e-05	0.0003321	30	344	RPS12,RPS15,SCAND1,ALDOC,AKR1B1,SIRT2,ATP5F1A,SOD1,ATP6V0B,FXYD6,GPX1,GPX4,GUK1,PEBP1,PRDX1,COPE,TXN,UBB,UBC,UCHL1,UQCRC1,COX6B1,PRKCZ,PSMC4,DBI,TIMM13,JPT1,ENO1,RPL8,RPL19
Drug	CID000001060	pyruvic acid	1.119e-07	0.002864	3.33e-05	0.0003573	34	424	CLPP,MAEA,MDH2,ALDOC,AKR1B1,SLC25A4,SLC25A5,SLC25A6,GAPDH,BCAT2,BCS1L,NDUFS3,NDUFV1,NDUFS8,BSG,TALDO1,ILVBL,XRCC6P2,TKT,HAGH,TPI1,PFKM,CPT1C,PKM,UQCRC1,UQCRH,UROD,TXN2,IDH3B,IDH3G,NDUFS7,PSMD3,MRPS2,ENO1
Drug	ctd:C406224	valdecoxib	1.285e-07	0.00329	3.782e-05	0.0004057	47	705	MRPL51,NAA10,ALAS1,CREB3,LCMT1,CCT7,CHCHD6,NHP2,AHSA1,CCT5,CIAO2B,DYNLL1,AUP1,BLVRB,NSFL1C,EBNA1BP2,NSMCE1,ADRM1,TUBA1C,GSS,TKT,FAM3A,TXN,AP2M1,UFD1,KXD1,PMM1,MRPL55,POR,MRPL14,PSMA7,PSMB2,PSMB3,PSMB6,PSMB7,PSMC3,PSMC4,PSMC5,PSMD3,PSMD7,PSMD8,PSMD11,IVD,LAMTOR1,RFC2,ECH1,JPT1
Drug	CID006476006	beta-lactone	1.311e-07	0.003356	3.801e-05	0.0004077	14	84	ATP6AP1,UBA52,UBB,UBC,PSMA7,PSMB2,PSMB3,PSMB6,PSMB7,PSMC3,PSMC4,PSMC5,PSMD8,SEM1
Drug	ctd:D006997	Hypochlorous Acid	1.321e-07	0.003383	3.801e-05	0.0004077	32	387	SCAND1,AKR1A1,AKR1B1,FOXRED1,APEH,APEX1,PHPT1,SLC25A39,SOD1,RUVBL2,BLVRB,FASTK,ERP29,ADRM1,GPX1,GPX4,GSS,CORO1A,PRDX1,RPL35,TBRG4,NCAPH2,CLTA,PPP2R1A,NDUFS7,PSMA7,PSMB3,PSMD7,EXOSC5,PSMD11,SLC35C2,MRPL4
Drug	CID000004591	AC1L1IIA	1.517e-07	0.003885	4.316e-05	0.0004631	20	172	MDH2,SDF2,SLC25A4,SLC25A5,SLC25A6,ATP5F1B,ATP5MC2,ATP5ME,ATP6V0B,ATP6AP1,ATP5PO,GAPDH,ATP6V0D1,TXN,AP2M1,UQCRC1,UQCRH,PRDX5,TXN2,ATP5MF
Drug	CID000023925	Fe(III	1.8e-07	0.004609	5.065e-05	0.0005433	39	537	MDH2,FANCG,FOXRED1,ALKBH7,APEX1,APRT,SOD1,GAPDH,NDUFB2,NDUFB7,NDUFB8,NDUFB9,NDUFB10,NDUFS3,NDUFV1,NDUFS5,NDUFS8,NDUFV3,NTHL1,RNF25,TXNDC17,PRDX2,HAGH,PFDN5,HMOX2,TXN,COX6A1P2,SLC35A2,UQCRC1,UQCRH,UROD,TXN2,COX4I1,COX6B1,POR,PPP1CA,NDUFS7,RPL10P16,NUBP2
Drug	ctd:C051786	metolachlor	1.916e-07	0.004905	5.25e-05	0.0005632	11	51	RPL30,RPL31,RPL34,RPS3,RPS6,RPS11,RPS14,RPL35,RPL13,RPL18,RPL19
Drug	ctd:C584509	C646 compound	1.924e-07	0.004927	5.25e-05	0.0005632	95	1918	RPL34,RPS27P29,APBB3,RPS28,WDR54,MCRIP1,TMEM205,POLR1H,RPS7P10,ALDOC,FLOT2,FOXRED1,CENPT,MED29,PUF60,SGTA,SUMO2P6,WDR83,RPS23P8,DRAP1,GADD45GIP1,MSRB2,SPINT2,RPL35P1,RBMX2,EBP,FTH1P2,TCF25,FTH1P8,FTH1P11,LSM7,ATP6AP1,SPG7,TUBAP2,BLVRB,STK19,PMPCA,NFKBIB,MYDGF,AP1M1,MLST8,NSMCE1,PCGF1,RPS26P47,ADRM1,RPS26P31,FABP5P1,RPS29P16,GSS,PEBP1,TKT,UBE2V1P2,HAGH,CDC25B,B4GALT7,LYPLA2,PEPD,HMOX2,PFKM,TUFM,TR…
Drug	CID000000619	ribulose	1.941e-07	0.004971	5.25e-05	0.0005632	13	74	CLPP,RPS14,RPS18,MDH2,ALDOC,AKR1B1,MSRB2,GAPDH,NDUFB9,TALDO1,TKT,PFKM,DCXR
Drug	2038_DN	Danazol [17230-88-5]; Down 200; 11.8uM; HL60; HG-U133A	1.948e-07	0.004987	5.25e-05	0.0005632	21	191	RABEPK,PEMT,PPME1,MPG,SIVA1,RPUSD2,USE1,ILVBL,HTRA2,ERG28,TBRG4,COPE,PIN1,UFD1,NRBP1,TMEM161A,DMAC2,EMC9,RHOT2,ZDHHC4,RPL18
Drug	CID000000729	glyceraldehyde-3-phosphate	2.01e-07	0.005147	5.361e-05	0.0005751	19	159	MAEA,ACTB,MDH2,ALDOC,MPG,THYN1,CCT5,GAPDH,TALDO1,TKT,TPI1,PFKM,TXN,SLC35A2,PKM,PSMC4,RPL10P16,ENO1,RPL19
Drug	CID000001110	succinate	2.517e-07	0.006445	6.561e-05	0.0007038	29	339	MRPS12,MAEA,MDH2,UQCRHL,SLC25A4,SLC25A5,SLC25A6,APEX1,ATP5F1A,ATP5F1B,GAPDH,BCS1L,NDUFS3,NDUFV1,NDUFS8,PFKM,PKM,UQCRC1,UQCRH,UROD,PRDX5,TXN2,POR,ATP5MF,IDH3B,IDH3G,ACOT8,TIMM8B,ENO1
Drug	1988_DN	Captopril [62571-86-2]; Down 200; 17.2uM; HL60; HG-U133A	2.537e-07	0.006495	6.561e-05	0.0007038	21	194	ACTB,FARSA,GAPDH,FASTK,BSG,MLX,PRPF4,TKT,DDA1,ELOVL1,PPP1CA,THOC6,PPP5C,PSMC3,DDOST,TMEM161A,SLC35C2,ARPC2,MRPS18A,MLF2,ENO1
Drug	6914_DN	carmustine; Down 200; 100uM; MCF7; HT_HG-U133A	2.537e-07	0.006495	6.561e-05	0.0007038	21	194	MRPS12,ACTB,FARSA,CREB3,GAPDH,RNF25,AIP,ERG28,PRPF4,UBE2L6,AP2S1,TXN2,ABHD14A,IDH3G,PSMC3,TMEM161A,SLC52A2,SLC35C2,MRPS18A,MLF2,ENO1
Drug	CID000475367	AC1L9SSV	2.572e-07	0.006586	6.586e-05	0.0007065	7	17	RPL37A,RPLP0,SNU13,RPL13A,RPL26L1,RPL8,RPL19
Drug	ctd:D011748	Pyrogallol	2.665e-07	0.006824	6.757e-05	0.0007248	20	178	RPL26,RPL31,RPS12,AKR1A1,SELENOW,NDUFB10,RPL10A,PKIG,PRDX1,CDK4,PFDN1,PHB,UBB,UBC,UCHL1,COX4I1,COX6B1,EEF1B2,ENO1,RPL8
Drug	1942_DN	Chlorhexidine [55-56-1]; Down 200; 8uM; PC3; HG-U133A	2.767e-07	0.007084	6.812e-05	0.0007308	21	195	MPG,EDF1,FASTK,BSG,ERG28,TBRG4,COPE,PHB,YIPF2,GRHPR,PIN1,EXOSC4,NRBP1,SLC52A2,DRG2,DMAC2,RHOT2,ECH1,MRPL4,MRPS2,VPS28
Drug	2152_DN	Solanine alpha [20562-02-1]; Down 200; 4.6uM; HL60; HT_HG-U133A	2.767e-07	0.007084	6.812e-05	0.0007308	21	195	MRPS12,TMEM222,STK25,CENPT,APRT,MSRB2,CENPX,NDUFB7,NDUFS8,ZMAT5,NSFL1C,COPS6,YIPF2,DDA1,RBM42,IDH3G,RNF113A,URM1,MLF2,NUTF2,QTRT1
Drug	6906_DN	STOCK1N-28457; Down 200; 20uM; MCF7; HT_HG-U133A	2.767e-07	0.007084	6.812e-05	0.0007308	21	195	ACTB,GAPDH,ZMAT5,BSG,MYDGF,AIP,ERG28,PRPF4,TKT,ACOT7,AP2S1,DDA1,ELOVL1,PPP2R1A,PSMB2,PSMC3,SLC35C2,ARPC2,ARFRP1,QTRT1,ENO1
Drug	ctd:D004147	Dioxins	2.82e-07	0.007221	6.877e-05	0.0007378	56	935	RPL34,RPN1,NRN1,FARSA,AHCY,ALAS1,SEC13,STK25,NELFCD,OTUB1,APEH,APEX1,ERGIC3,RUVBL1,THYN1,CCT5,EDF1,BCS1L,RPL10A,NSFL1C,IMP4,EIF2B2,ELOB,MLX,ADRM1,OAZ1,AIP,TMED3,WDR45,PRPF4,FIBP,CD63,HSD17B10,HAGH,DCTN3,PARK7,ACOT7,PFDN1,TOLLIP,ELOVL1,FBXO44,PSMB2,PSMB3,PSMC3,PSMC4,PSMC5,PSMD7,EIF6,DDOST,CIAPIN1,QARS1,PIH1D1,NOSIP,BCAP31,NUTF2,SLC35B1
Drug	1927_DN	Verapamyl hydrochloride [152-11-4]; Down 200; 8.2uM; PC3; HG-U133A	3.016e-07	0.007722	7.217e-05	0.0007742	21	196	ACTB,GADD45GIP1,FASTK,BSG,SURF2,ERP29,AIP,COPE,ACOT7,HSPBP1,PHB,TIMM22,PPP5C,PSMC3,COMMD4,PIH1D1,EMC9,ECH1,MRPS18A,VPS28,ENO1
Drug	1770_DN	Lobeline alpha (-) hydrochoride [134-63-4]; Down 200; 10.6uM; HL60; HG-U133A	3.016e-07	0.007722	7.217e-05	0.0007742	21	196	TMEM222,FARSA,NAGK,TRMT1,SIVA1,MRPL28,HTRA2,ERG28,COPE,PIN1,UFD1,EXOSC4,NRBP1,B3GNTL1,THOC6,PPP4C,CZIB,RHOT2,ZDHHC4,JPT1,DCXR
Drug	CID000000752	aldonates	3.179e-07	0.00814	7.537e-05	0.0008086	14	90	MAEA,MDH2,ALDOC,AKR1B1,GAPDH,HAGH,TPI1,PFKM,GRHPR,PGAM4,PKM,RPS2P55,MRPS2,ENO1
Drug	1402_DN	Ampyrone [83-07-8]; Down 200; 19.6uM; HL60; HG-U133A	3.285e-07	0.008412	7.718e-05	0.0008279	21	197	POP7,PPME1,MPG,BSG,ILVBL,HTRA2,ERG28,TBRG4,COPE,NCAPH2,UFD1,EXOSC4,C11orf49,NRBP1,IDH3G,PPP4C,TMEM161A,SLC35C2,EMC9,RHOT2,VPS28
Drug	ctd:C470047	aminomethylphosphonic acid	3.347e-07	0.00857	7.791e-05	0.0008358	15	104	RPL27,RPL28,RPL32,RPLP2,RPN2,RPS5,RPS11,ACTG1,RPS16,RPL10A,PRMT1,COX6B1,PSMB7,ENO1,RPL8
Drug	CID000001111	succinyl-coenzyme A	3.961e-07	0.01014	9.137e-05	0.0009802	19	166	MRPS12,MDH2,ALAS1,EEF1A1P9,NME1,ILVBL,GSS,GCAT,TUFM,TXN,PGAM4,PKM,UROD,PMM1,IDH3B,IDH3G,ACOT8,QTRT1,RPL19
Drug	CID000000525	malate	4.855e-07	0.01243	0.000111	0.001191	22	219	MDH2,ALDOC,SLC25A4,SLC25A5,SLC25A6,ATP5F1A,GAPDH,NDUFS3,NDUFV1,NDUFS8,PFKM,TUFM,TXN,CPT1C,PKM,UQCRC1,UQCRH,UROD,ATP5MF,IDH3B,IDH3G,TIMM13
Drug	ctd:D020122	tert-Butylhydroperoxide	6.446e-07	0.01651	0.0001461	0.001567	89	1808	RPL27,RPL27A,RPL29,RPL31,RPLP1,RPS5,RPS8,ACTB,RPS14,RPS16,RPS21,ECSIT,TMEM205,MCRS1,ALAS1,ZNHIT1,PFDN6,MPG,MED29,NELFCD,DRAP1,AHSA1,MSRB2,SPINT2,RPUSD2,DYNLL1,SOD1,ATP5PO,GAPDH,SSR4,NDUFB2,NDUFB7,CHMP2A,ATG4B,FASTK,MYDGF,ERP29,COPS6,TALDO1,ILVBL,ELOB,GPX1,GPX4,OAZ1,AIP,PRDX2,TKT,PRDX1,FIBP,TMSB10,HSD17B10,RPL13A,CDC25B,UBE2L6,COPE,ACOT7,HMOX2,TRAPPC1,TXN,YIPF2,GRHPR,PRDX5,TXN2,TIMM22,POLR2F,DDX56…
Drug	CID000061668	boronic acid	6.687e-07	0.01712	0.0001502	0.001611	13	82	UBC,PSMA7,PSMB2,PSMB3,PSMB6,PSMB7,PSMC3,PSMC4,PSMD3,PSMD8,PSMD11,ACOT8,SEM1
Drug	CID000004278	1,1'-azobis(N,N-dimethylformamide	7.515e-07	0.01924	0.0001673	0.001795	19	173	ACTB,ACTG1,ACTL6B,SLC25A4,SLC25A5,SLC25A6,APEX1,SOD1,GAPDH,PRDX2,GSS,PRDX1,HMOX2,PHB,TXN,UROD,PRDX5,TXN2,POR
Drug	CID000000850	AC1L1A5Z	7.905e-07	0.02024	0.0001744	0.001871	15	111	CLPP,MAEA,ALDOC,SAP30BP,GAPDH,TALDO1,TKT,TPI1,PFKM,TXN,SLC35A2,PKM,TXN2,PPP1CA,DCXR
Drug	ctd:D005947	Glucose	7.967e-07	0.0204	0.0001744	0.001871	74	1420	RABEPK,RPL29,RPL32,RPL34,RPL37A,RPL38,RPLP1,RPLP2,RPN1,RPS5,RPS6,RPS8,RPS9,ACTB,RPS11,RPS12,ACTG1,RPS24,AKR1A1,PEF1,FAU,RACK1,MAD2L2,AKR1B1,SEC13,NELFCD,R3HCC1,CCT7,CCDC12,ELOF1,TRUB2,YIF1B,EIF3H,EIF3I,LSM7,ATP5F1A,SOD1,ATP5PO,GAPDH,SSR4,NDUFB8,NSFL1C,MED22,SNU13,AP1M1,GPX1,TXNDC17,TMED3,ATP6V0D1,PEBP1,SLC2A6,PRDX1,CD63,RPL35,RPL13A,CFL1,ACOT7,HMOX2,TXN,TBCB,UCHL1,CLTA,PKM,PMM1,NDUFB11,PRKCZ,PSMB…
Drug	CID000000298	tifomycin	8.615e-07	0.02206	0.0001869	0.002005	24	263	MRPS12,RPS12,RPS18,SLC25A4,SLC25A5,SLC25A6,APEH,EIF3G,ATP5F1B,NDUFV1,EEF1A1P9,HTRA2,PRDX2,TUFM,COX6A1P2,SLC35A2,UROD,TIMM22,COX4I1,COX6B1,MRPS11,QARS1,FIS1,TIMM13
Drug	ctd:C025256	nonylphenol	8.928e-07	0.02286	0.0001921	0.002061	35	485	RPL26,RPN2,ACTB,RPS24,PEF1,AHCY,ALAS1,PSMG3,APEH,ASMTL,SNRPD2,ATP5F1B,ATP6AP1,ATP5PO,BRK1,LIN7B,BLVRB,ERP29,GPX4,RPL14,PEBP1,PRDX1,RPL35,LYPLA2,PFKM,TUFM,UQCRC1,TOMM7,RPL36,RNF113A,MRPL54,ARPC2,EEF1B2,VPS28,ENO1
Drug	CID000065911	Girodazole	9.5e-07	0.02433	0.0002027	0.002175	7	20	RPL37A,RPLP0,SNU13,RPL13A,RPL26L1,RPL8,RPL19
Drug	CID000000683	1,3-diphosphoglycerate	9.752e-07	0.02497	0.0002064	0.002214	10	48	MAEA,AKR1B1,SPINT2,GAPDH,PFKM,TXN,PGAM4,PKM,TXN2,PMM1
Drug	6918_DN	ICI182,780; Down 200; 1uM; PC3; HT_HG-U133A	1.062e-06	0.0272	0.000223	0.002392	20	194	MRPS12,ACTB,OTUB1,GAPDH,DPM2,BSG,AIP,ERG28,TKT,ACOT7,AP2S1,DDA1,SLC35A2,PPP1R7,MRPS11,PSMC3,RHOT2,MRPS18A,ARFRP1,ENO1
Drug	ctd:D007538	Isoniazid	1.118e-06	0.02863	0.0002328	0.002497	15	114	ALAS1,ATP5F1B,GAPDH,NDUFA8,NDUFB2,NDUFB7,NDUFB10,NDUFS3,NDUFV1,NDUFS8,PARK7,HMOX2,TXN2,COX6B1,POR
[truncated: 328 more rows]

## Sheet: module_brown
Category	ID	Name	p-value	q-value Bonferroni	q-value FDR B&H	q-value FDR B&Y	Hit Count in Query List	Hit Count in Genome	Hit in Query List
[truncated: 7,922 more rows]

## Sheet: module_cyan
Category	ID	Name	p-value	q-value Bonferroni	q-value FDR B&H	q-value FDR B&Y	Hit Count in Query List	Hit Count in Genome	Hit in Query List
[truncated: 565 more rows]

[truncated: 18 more sheets: module_green, module_greenyellow, module_grey, module_grey60, module_lightcyan, module_lightgreen, module_lightyellow, module_magenta, module_midnightblue, module_pink, module_purple, module_red, module_royalblue, module_salmon, module_tan, module_turquoise, module_yellow, Top_25_hub_genes]
