# Supplementary material for: Modeling gene x environment interactions in PTSD using glucocorticoid-induced transcriptomics in human neurons
Source: Research Square preprint supplement (doi:10.21203/rs.3.rs-267139/v1), 2021-02-25
Supplement: Supplementary file 6 [file bcfd99b15f22edba75733b4f.xlsx]

## Sheet: Sheet1
Supplemental Table 4. Differential transcriptional response to Hcort between PTSD+ and PTSD- participants.
	100nM - mixed FB			1000nM - mixed FB			2500nM - mixed FB			100nM - NGN2			1000nM - NGN2			2500nM - NGN2
Gene	logFC	P.Value	adj.P.Val	logFC	P.Value	adj.P.Val	logFC	P.Value	adj.P.Val	logFC	P.Value	adj.P.Val	logFC	P.Value	adj.P.Val	logFC	P.Value	adj.P.Val
AC090833.1	-0.213066	0.809204	0.999916	-0.283019	0.748461	0.999901	0.125146	0.887206	0.999678	-2.89914	0.00157883	0.51467	-3.71962	0.000118758	0.29273	-3.45903	0.000204677	0.273401
FAR2P4	0.153005	0.879156	0.999916	-0.0628942	0.950163	0.999901	0.932056	0.355905	0.999678	-2.26279	0.027356	0.978227	-2.71758	0.0108237	0.569187	-3.03828	0.00349883	0.729488
PRDM1	-0.398594	0.658887	0.999916	-0.54868	0.543676	0.999901	-0.624687	0.489506	0.999678	0.335159	0.710431	0.999833	-1.47687	0.116605	0.849521	-2.88407	0.00207146	0.637746
COL21A1	0.386852	0.692761	0.999916	0.641654	0.512687	0.999901	0.440253	0.65302	0.999678	-1.26763	0.198037	0.999833	-1.80209	0.0782224	0.810739	-2.86511	0.0045515	0.802818
MSH5	0.442048	0.521952	0.999916	0.574884	0.405494	0.999901	0.530467	0.442556	0.999678	-1.2393	0.0757128	0.999833	-0.712352	0.319024	0.947081	-2.63637	0.000282024	0.318367
AL353660.1	-0.654198	0.404986	0.999916	-0.477221	0.543033	0.999901	-0.216954	0.781911	0.999678	-0.0827647	0.915873	0.999833	-2.07728	0.0122792	0.591573	-2.63088	0.00126579	0.622994
AC103855.2	-0.198643	0.867674	0.999916	0.28869	0.808694	0.999901	-0.397364	0.738996	0.999678	-0.964339	0.419729	0.999833	-2.09102	0.0931247	0.826336	-2.52728	0.0371238	0.999973
CAVIN1	-0.458402	0.599496	0.999916	-0.330104	0.705172	0.999901	-0.687459	0.431588	0.999678	-2.14973	0.0159533	0.912533	-3.09766	0.000985772	0.321002	-2.5228	0.00502678	0.820347
SGCG	-0.0192431	0.981331	0.999916	0.44803	0.586299	0.999901	0.146945	0.858195	0.999678	-1.57342	0.0591568	0.999833	-1.75374	0.0422364	0.721684	-2.5034	0.00325374	0.729488
HIST1H3H	0.0945704	0.889303	0.999916	0.473128	0.487001	0.999901	0.259969	0.702145	0.999678	-1.88753	0.00693222	0.755118	-1.50297	0.0353406	0.708731	-2.48871	0.000480446	0.428178
C13orf46	0.313468	0.637892	0.999916	0.225279	0.735077	0.999901	0.394352	0.553988	0.999678	-1.96682	0.00420678	0.725148	-1.31815	0.0586727	0.77141	-2.34311	0.000758695	0.491137
FNDC7	0.277785	0.767095	0.999916	0.233802	0.803124	0.999901	-0.137461	0.883448	0.999678	-1.55392	0.10098	0.999833	-2.34344	0.0179437	0.607003	-2.32671	0.0152982	0.999973
RNF43	0.40693	0.722	0.999916	0.188661	0.868933	0.999901	-0.689021	0.547258	0.999678	-1.48141	0.197905	0.999833	-1.11248	0.347913	0.956785	-2.28578	0.048896	0.999973
PGGHG	0.0832003	0.907466	0.999916	0.113079	0.874481	0.999901	0.010828	0.98793	0.999678	-1.78563	0.0147889	0.901248	-1.58905	0.0347124	0.708731	-2.27301	0.00220563	0.643931
AL109976.1	-0.254793	0.7547	0.999916	-0.0479636	0.953081	0.999901	-0.115688	0.887152	0.999678	-0.0303508	0.9703	0.999833	-1.23984	0.144309	0.866715	-2.26881	0.0068365	0.848803
TEAD4	-0.78848	0.37799	0.999916	0.0454163	0.959379	0.999901	-0.855065	0.3393	0.999678	0.0693444	0.938014	0.999833	-1.35201	0.145536	0.866715	-2.25824	0.0134064	0.999973
CARD16	0.112727	0.868524	0.999916	-0.0981526	0.885394	0.999901	-0.399425	0.558	0.999678	-0.847424	0.216032	0.999833	-0.521602	0.459404	0.966679	-2.1887	0.00196365	0.637746
TM6SF2	-0.172778	0.79797	0.999916	-0.0170745	0.979814	0.999901	-0.281958	0.676274	0.999678	-2.39346	0.000698691	0.4335	-1.23334	0.0804574	0.811656	-2.17882	0.00187957	0.637746
MUC20	0.366464	0.681129	0.999916	0.337164	0.705351	0.999901	1.00062	0.263856	0.999678	-1.32249	0.141166	0.999833	-1.61325	0.0833366	0.819477	-2.1768	0.0169097	0.999973
AC087623.1	0.469885	0.487113	0.999916	0.617012	0.362157	0.999901	0.256885	0.703646	0.999678	-0.573146	0.397079	0.999833	-2.29235	0.00157306	0.354135	-2.16649	0.00198933	0.637746
ALDH1L1-AS2	0.363635	0.583587	0.999916	0.525715	0.428668	0.999901	0.580883	0.382084	0.999678	-1.89549	0.00550933	0.755118	-1.05669	0.126139	0.851439	-2.13839	0.00188856	0.637746
AP000428.2	0.889116	0.268844	0.999916	0.393344	0.623397	0.999901	0.104373	0.896242	0.999678	-0.552638	0.490651	0.999833	-0.552907	0.504441	0.96826	-2.11382	0.0100594	0.956947
GPR157	0.528239	0.493007	0.999916	0.00130872	0.998642	0.999901	0.446276	0.562275	0.999678	-0.919328	0.234552	0.999833	-0.129495	0.870571	0.991747	-2.10488	0.00777178	0.873988
AC098820.1	-0.0673015	0.909602	0.999916	-0.196689	0.740118	0.999901	-0.179908	0.76157	0.999678	-0.394036	0.506912	0.999833	-1.00127	0.105579	0.839415	-2.09922	0.000710491	0.48123
MRGPRF	0.143645	0.877938	0.999916	-0.190635	0.838501	0.999901	-1.09028	0.24615	0.999678	-0.602946	0.519779	0.999833	-2.09409	0.0332349	0.708731	-2.04131	0.0320357	0.999973
ACTA2-AS1	-0.469698	0.4424	0.999916	-0.319456	0.600917	0.999901	-0.992365	0.107329	0.999678	-0.468078	0.443968	0.999833	-1.67663	0.00956974	0.561977	-2.02148	0.00145167	0.637746
AC127496.5	-0.7906	0.301895	0.999916	-0.400447	0.599918	0.999901	-0.530901	0.487162	0.999678	-2.67687	0.000785813	0.4335	-1.28627	0.106119	0.840239	-2.0191	0.00989402	0.956947
KCNK13	-0.0831623	0.930127	0.999916	-0.235976	0.803547	0.999901	-0.278377	0.769195	0.999678	-1.18899	0.212708	0.999833	-0.527581	0.59071	0.981723	-1.99336	0.0387224	0.999973
AL049840.4	0.0606366	0.933153	0.999916	0.0777915	0.914307	0.999901	-0.335799	0.642551	0.999678	-0.775164	0.285711	0.999833	-1.38516	0.0671726	0.786126	-1.99301	0.00734972	0.853304
AC109322.2	0.0265111	0.97799	0.999916	-0.62167	0.518339	0.999901	0.250662	0.794256	0.999678	-1.68977	0.0822205	0.999833	-1.86482	0.0638358	0.781878	-1.9827	0.0423111	0.999973
AC018638.4	0.0926479	0.89493	0.999916	0.352913	0.615234	0.999901	0.512792	0.465681	0.999678	0.52142	0.45824	0.999833	1.23963	0.0907484	0.826336	-1.97638	0.00621621	0.820347
AL391422.4	0.86493	0.186243	0.999916	0.475974	0.464891	0.999901	0.141302	0.827922	0.999678	-1.89549	0.00470527	0.726822	-1.64623	0.0165269	0.605677	-1.96879	0.00340041	0.729488
ADAMTS9-AS2	-0.0709047	0.931648	0.999916	-0.00377635	0.996355	0.999901	-0.0675079	0.934915	0.999678	-0.979169	0.23874	0.999833	-2.12865	0.0148834	0.600325	-1.9612	0.0201778	0.999973
CDCP1	-0.351009	0.634655	0.999916	-0.345826	0.639654	0.999901	-0.160118	0.828276	0.999678	-2.55757	0.000904835	0.4335	-0.49343	0.518254	0.97125	-1.94659	0.0101614	0.961248
MR1	-0.237966	0.7825	0.999916	-0.0759029	0.929815	0.999901	-0.0821057	0.924097	0.999678	-0.453027	0.599482	0.999833	-1.55847	0.0836123	0.819807	-1.94659	0.0266902	0.999973
TEAD3	-0.111885	0.868118	0.999916	-0.0495075	0.941424	0.999901	-0.297365	0.659186	0.999678	-2.08866	0.00276144	0.631886	-2.38462	0.00102521	0.321282	-1.93906	0.00524494	0.820347
IFI35	0.225003	0.771124	0.999916	0.0651192	0.932883	0.999901	-0.558782	0.470769	0.999678	0.0249227	0.974286	0.999833	-0.166331	0.835096	0.991747	-1.92295	0.0150873	0.999973
ITIH5	0.148691	0.854179	0.999916	-0.115556	0.886417	0.999901	0.343164	0.671621	0.999678	-0.844702	0.298411	0.999833	0.0061544	0.994125	0.99984	-1.89387	0.0218121	0.999973
ITPKB	-0.231668	0.764679	0.999916	-0.356616	0.645107	0.999901	-0.658257	0.396178	0.999678	-0.0985446	0.89865	0.999833	-0.477803	0.550565	0.977531	-1.85661	0.0188409	0.999973
CD81-AS1	0.240974	0.699801	0.999916	-0.240854	0.699942	0.999901	-0.283697	0.649936	0.999678	-1.55034	0.015276	0.901281	-2.55896	0.000176048	0.300494	-1.8521	0.00409067	0.775112
AC008525.1	0.228536	0.68597	0.999916	0.187379	0.740204	0.999901	-0.0474705	0.933027	0.999678	-1.89549	0.00127479	0.47969	-1.91187	0.00162906	0.354135	-1.8214	0.00190419	0.637746
FAM181A-AS1	0.103913	0.876981	0.999916	-0.239729	0.721109	0.999901	-0.834515	0.216487	0.999678	-1.4089	0.0389781	0.999833	-0.888845	0.202804	0.910048	-1.8214	0.0082772	0.878304
PHLDB2	0.25499	0.766995	0.999916	0.266998	0.756369	0.999901	-0.17919	0.835025	0.999678	-2.08353	0.0178148	0.935263	-1.42521	0.112328	0.846105	-1.81294	0.0382253	0.999973
MYO5C	0.171276	0.759917	0.999916	0.158908	0.776766	0.999901	-0.069156	0.901771	0.999678	-0.720732	0.201161	0.999833	-0.574738	0.322625	0.948678	-1.81004	0.00186923	0.637746
MYO1F	-0.470819	0.480301	0.999916	-0.121565	0.855134	0.999901	-0.204672	0.758607	0.999678	-0.556784	0.404251	0.999833	-0.0799356	0.907494	0.99258	-1.80974	0.00817109	0.878304
SNHG31	0.830475	0.258584	0.999916	0.729664	0.32036	0.999901	0.689899	0.347246	0.999678	-0.430981	0.556257	0.999833	0.0897322	0.905494	0.992475	-1.79683	0.0163169	0.999973
FAM181A	0.0272236	0.96758	0.999916	0.00768196	0.990849	0.999901	-0.0438275	0.947831	0.999678	-1.65101	0.0159698	0.912533	-1.43674	0.0410968	0.718265	-1.72431	0.0120178	0.999973
LINC01273	-0.147515	0.83366	0.999916	0.0430294	0.951145	0.999901	-0.185944	0.791246	0.999678	-0.252478	0.719354	0.999833	-0.450642	0.535181	0.974075	-1.71636	0.016848	0.999973
AC010624.1	0.420185	0.548425	0.999916	0.327709	0.639569	0.999901	0.304373	0.663559	0.999678	-1.4826	0.0370839	0.999833	-1.81464	0.0141457	0.598929	-1.71043	0.016746	0.999973
PLAT	0.0259516	0.970142	0.999916	-0.126575	0.85516	0.999901	-0.220868	0.750153	0.999678	-0.913334	0.190675	0.999833	-1.23133	0.0891936	0.826336	-1.70839	0.0160036	0.999973
COX6B2	-0.25815	0.699656	0.999916	-0.347775	0.603427	0.999901	-0.189011	0.777532	0.999678	-0.992531	0.141109	0.999833	-0.29178	0.673041	0.986582	-1.7	0.0130813	0.999973
AL672207.1	0.110793	0.766099	0.999916	-0.166061	0.655824	0.999901	-0.400171	0.28459	0.999678	-0.726218	0.0545191	0.999833	-0.982495	0.0126733	0.591573	-1.68904	2.37456e-05	0.201042
AK4P3	-0.00914423	0.990049	0.999916	-0.612887	0.404475	0.999901	-0.263232	0.719717	0.999678	-0.230584	0.753241	0.999833	-1.32153	0.084635	0.821871	-1.67476	0.0250974	0.999973
AC068205.2	0.665155	0.123534	0.999916	0.43684	0.309272	0.999901	0.620739	0.150163	0.999678	-0.149368	0.727173	0.999833	0.535207	0.2287	0.91692	-1.67458	0.000209899	0.273401
STOML3	0.0654035	0.933256	0.999916	-0.523795	0.503131	0.999901	-0.428893	0.5833	0.999678	-0.160766	0.836922	0.999833	0.0720827	0.928816	0.9944	-1.67401	0.0351315	0.999973
AC114971.1	-0.350614	0.670322	0.999916	0.136752	0.868047	0.999901	-0.339619	0.680065	0.999678	0.274649	0.73871	0.999833	-1.09196	0.20195	0.909312	-1.67323	0.0453355	0.999973
LINC00595	-0.015443	0.984813	0.999916	-0.0312522	0.969273	0.999901	0.397299	0.624666	0.999678	-0.93481	0.251645	0.999833	-0.874681	0.29876	0.940196	-1.66395	0.0435247	0.999973
NPIPB4	0.189798	0.699509	0.999916	0.522727	0.289582	0.999901	0.411022	0.404222	0.999678	-1.14701	0.0222064	0.958772	-1.83558	0.000561383	0.303214	-1.65797	0.00120554	0.622994
RAPGEF3	0.311157	0.67081	0.999916	0.1797	0.806005	0.999901	-0.217855	0.765937	0.999678	-1.82029	0.0150389	0.901248	-0.529674	0.48428	0.966679	-1.64589	0.0272808	0.999973
LINC01625	-0.148699	0.848945	0.999916	0.813999	0.299076	0.999901	0.189332	0.808402	0.999678	-0.349708	0.654409	0.999833	-1.11768	0.168938	0.888418	-1.6237	0.0407207	0.999973
MSNP1	0.417034	0.560425	0.999916	0.392562	0.583604	0.999901	0.260591	0.715786	0.999678	-1.8391	0.0121262	0.881015	-1.52413	0.04243	0.723532	-1.61947	0.0263687	0.999973
PLCG2	0.301651	0.701687	0.999916	0.862721	0.27524	0.999901	-0.277052	0.724959	0.999678	-1.91331	0.0174131	0.93194	-1.32595	0.106509	0.840971	-1.61646	0.0432443	0.999973
ZNF90	-0.159523	0.715733	0.999916	-0.189882	0.66474	0.999901	-0.0271944	0.950474	0.999678	-0.920772	0.0386136	0.999833	-0.357405	0.430592	0.965918	-1.61203	0.000451925	0.425136
HES2	-0.187596	0.801955	0.999916	-0.335815	0.653615	0.999901	-0.608954	0.416623	0.999678	0.959811	0.202132	0.999833	0.571364	0.460525	0.966679	-1.60149	0.0352873	0.999973
GPR143	-0.181944	0.683781	0.999916	-0.205066	0.64624	0.999901	-0.436784	0.329642	0.999678	-0.392551	0.380632	0.999833	-0.88237	0.0591979	0.774126	-1.58579	0.000686642	0.48123
AC018730.1	0.0201545	0.977512	0.999916	0.255278	0.721197	0.999901	0.0221693	0.975265	0.999678	-1.06733	0.138841	0.999833	-2.01279	0.00803119	0.550993	-1.57692	0.0303474	0.999973
AL157394.2	0.0840861	0.909779	0.999916	-0.132232	0.858576	0.999901	0.290032	0.696058	0.999678	-0.185338	0.802804	0.999833	-2.90339	0.000319814	0.300494	-1.57692	0.036675	0.999973
ARHGAP4	0.0303078	0.945752	0.999916	-0.144714	0.745361	0.999901	-0.15706	0.724506	0.999678	-1.28096	0.00527792	0.75367	-1.04536	0.0258864	0.666021	-1.56389	0.000783128	0.491137
AC110769.2	-0.00583882	0.993449	0.999916	0.0453307	0.949177	0.999901	0.537906	0.450431	0.999678	0.287743	0.685956	0.999833	0.182759	0.803621	0.991747	-1.56137	0.0310802	0.999973
PPP1R13L	0.125244	0.838191	0.999916	0.0657591	0.914605	0.999901	0.205559	0.737573	0.999678	-0.602946	0.327286	0.999833	-1.94484	0.0030214	0.437592	-1.55471	0.0133101	0.999973
DOK3	0.715018	0.105319	0.999916	-0.26085	0.551112	0.999901	-0.0844219	0.846835	0.999678	-1.28218	0.00447393	0.725148	-0.487813	0.282123	0.934908	-1.55439	0.000676507	0.48123
LPP-AS2	-0.0324869	0.963093	0.999916	-0.165162	0.814056	0.999901	-0.3155	0.653411	0.999678	0.829336	0.240018	0.999833	0.585204	0.420985	0.96369	-1.55121	0.030062	0.999973
ANKRD65	-0.445163	0.392596	0.999916	-0.543005	0.297694	0.999901	-0.523203	0.315516	0.999678	-1.4926	0.00529656	0.75367	-0.553895	0.303838	0.943371	-1.54279	0.00402098	0.773719
GDPD2	0.203543	0.78458	0.999916	0.166083	0.823482	0.999901	-0.0124107	0.986698	0.999678	-0.290937	0.696088	0.999833	-0.30557	0.691325	0.987662	-1.52813	0.0433365	0.999973
AP001025.1	0.110395	0.86235	0.999916	0.0612378	0.923372	0.999901	0.0298331	0.962625	0.999678	-1.11411	0.0836763	0.999833	-1.23886	0.0631338	0.781878	-1.52661	0.0189288	0.999973
GHRLOS	0.591671	0.381969	0.999916	0.241883	0.72012	0.999901	0.42921	0.52536	0.999678	-1.05595	0.12105	0.999833	-0.964459	0.169658	0.888418	-1.52483	0.0266287	0.999973
LINC01902	0.220572	0.747524	0.999916	0.0711674	0.917248	0.999901	0.187132	0.78475	0.999678	-0.492127	0.473328	0.999833	-0.369945	0.601527	0.981746	-1.51394	0.0299976	0.999973
PGDP1	-0.246386	0.59033	0.999916	0.0594732	0.896497	0.999901	-0.260569	0.569172	0.999678	-1.0022	0.0313185	0.999833	-0.673383	0.157181	0.872353	-1.50881	0.00151089	0.637746
AF201337.1	-0.321714	0.537476	0.999916	0.213079	0.682723	0.999901	-0.140288	0.787765	0.999678	-1.90964	0.000476491	0.4335	-1.14402	0.0366587	0.708731	-1.48517	0.00566305	0.820347
LYPLA2P1	0.147016	0.693262	0.999916	-0.0553112	0.88197	0.999901	-0.0888702	0.811476	0.999678	-1.26625	0.00111318	0.459743	-1.4171	0.000451805	0.300494	-1.47619	0.000177523	0.273401
TMEM72-AS1	1.11648	0.117936	0.999916	0.412228	0.560549	0.999901	0.740457	0.297216	0.999678	-0.693825	0.328434	0.999833	-0.195699	0.788927	0.991747	-1.47483	0.0402528	0.999973
AC122129.1	0.14906	0.839589	0.999916	-0.071446	0.9227	0.999901	0.684705	0.353999	0.999678	-1.89164	0.0121806	0.881015	-1.30135	0.0906996	0.826336	-1.47318	0.0487462	0.999973
AL732372.2	0.144399	0.81174	0.999916	0.480163	0.42937	0.999901	0.287902	0.63509	0.999678	-0.0201379	0.973496	0.999833	1.04338	0.0992412	0.831319	-1.47274	0.0174652	0.999973
C1RL	0.27109	0.550847	0.999916	0.029298	0.948529	0.999901	-0.13211	0.771056	0.999678	-0.834655	0.0694297	0.999833	-1.92017	0.000113063	0.29273	-1.46753	0.0018528	0.637746
AC111200.2	0.150762	0.799708	0.999916	-0.463004	0.436817	0.999901	-0.321223	0.589111	0.999678	-1.59893	0.00878583	0.788611	-0.863956	0.162423	0.882355	-1.4446	0.0173763	0.999973
ST13P3	-0.680315	0.109389	0.999916	-0.14574	0.729164	0.999901	0.0618929	0.883056	0.999678	-0.953464	0.0262198	0.971511	-1.3986	0.00194565	0.378685	-1.44199	0.00101974	0.595423
AC009090.6	0.799439	0.111277	0.999916	0.426996	0.391687	0.999901	0.480666	0.335298	0.999678	-1.55567	0.00253057	0.612145	-0.418979	0.415822	0.962742	-1.43966	0.00498279	0.820347
BAIAP2L1	-0.514935	0.435987	0.999916	-0.681858	0.303155	0.999901	-1.06026	0.111394	0.999678	-0.447562	0.498117	0.999833	-1.15111	0.0946959	0.829352	-1.43368	0.0327082	0.999973
AC002056.1	0.327381	0.522494	0.999916	-0.937966	0.0700132	0.999901	0.156484	0.759567	0.999678	-0.721227	0.161404	0.999833	-1.10854	0.038965	0.717626	-1.41055	0.00729462	0.853304
CDCA2	0.326251	0.570744	0.999916	0.123699	0.829617	0.999901	-0.0392108	0.945607	0.999678	-2.14014	0.000394121	0.4335	-2.57974	4.72675e-05	0.29273	-1.40943	0.0164901	0.999973
SDHDP6	-0.150307	0.787453	0.999916	0.225841	0.685501	0.999901	0.121934	0.826849	0.999678	-0.646716	0.248331	0.999833	-0.297189	0.606152	0.981746	-1.40271	0.0139651	0.999973
CIAPIN1P	0.124648	0.766627	0.999916	-0.41678	0.32269	0.999901	0.11968	0.775667	0.999678	-1.68429	0.000150357	0.430615	-1.67956	0.000241227	0.300494	-1.39756	0.00138513	0.633901
MORN3	0.206567	0.757468	0.999916	0.207355	0.756573	0.999901	0.535899	0.424027	0.999678	-0.30319	0.650505	0.999833	0.220266	0.749958	0.991747	-1.39727	0.0398312	0.999973
SFRP4	0.073011	0.908941	0.999916	0.120267	0.850573	0.999901	0.0171892	0.978516	0.999678	0.242282	0.704426	0.999833	-0.129645	0.844182	0.991747	-1.3886	0.0325966	0.999973
AC068057.1	0.224647	0.735585	0.999916	0.0783575	0.906196	0.999901	0.0149625	0.982047	0.999678	-2.11776	0.00214496	0.60941	-1.22558	0.0779845	0.809948	-1.38511	0.0404324	0.999973
GLYCTK-AS1	0.428301	0.534299	0.999916	0.484357	0.482368	0.999901	0.685869	0.320774	0.999678	2.43308	0.000724228	0.4335	1.57038	0.03012	0.699056	-1.38511	0.0474562	0.999973
CTBP2P8	0.258182	0.65707	0.999916	0.187926	0.746493	0.999901	-0.447295	0.442497	0.999678	-1.64625	0.00595332	0.755118	-1.19597	0.0497266	0.742302	-1.38056	0.020012	0.999973
EEF1DP1	-0.217327	0.653533	0.999916	0.367339	0.448694	0.999901	-0.410894	0.397022	0.999678	-0.902406	0.0656493	0.999833	-0.798179	0.1138	0.84704	-1.37148	0.00592279	0.820347
AC004908.2	0.0176169	0.973143	0.999916	0.271924	0.603672	0.999901	-0.425816	0.416969	0.999678	-0.27562	0.598772	0.999833	0.145516	0.787869	0.991747	-1.36943	0.010731	0.97229
EIF1P5	-0.697239	0.0719677	0.999916	-0.43218	0.261046	0.999901	0.0239545	0.950084	0.999678	-1.39766	0.000497099	0.4335	-1.46843	0.000406664	0.300494	-1.36427	0.000658626	0.48123
DLEC1	0.337023	0.581879	0.999916	0.228548	0.708666	0.999901	0.0935982	0.878327	0.999678	-0.372568	0.542817	0.999833	-2.14244	0.00113924	0.321282	-1.36392	0.0285446	0.999973
SPANXA2-OT1	0.185532	0.742083	0.999916	-0.756415	0.182514	0.999901	0.645744	0.254232	0.999678	-0.232777	0.679754	0.999833	-0.320985	0.581877	0.981723	-1.35811	0.0183608	0.999973
ARHGEF10	0.504812	0.233987	0.999916	0.0388555	0.926612	0.999901	0.195362	0.643548	0.999678	-1.45956	0.00092019	0.4335	-1.55517	0.000652641	0.303214	-1.349	0.00206284	0.637746
AC073593.2	0.406935	0.530496	0.999916	0.31053	0.63197	0.999901	0.453607	0.484595	0.999678	-0.855863	0.189376	0.999833	0.0361523	0.956923	0.995261	-1.3404	0.0417425	0.999973
MAK	0.36253	0.54014	0.999916	0.287373	0.627063	0.999901	0.286585	0.628006	0.999678	-1.12264	0.0609318	0.999833	-1.62596	0.00948824	0.561977	-1.33739	0.0264118	0.999973
CDC6	0.10965	0.867838	0.999916	0.0347693	0.957914	0.999901	-0.28509	0.665461	0.999678	-1.29818	0.0521842	0.999833	-0.747661	0.2743	0.931027	-1.33168	0.0465673	0.999973
AC002075.2	-0.5638	0.29079	0.999916	-0.0473851	0.928948	0.999901	0.302806	0.569279	0.999678	-1.10833	0.0401938	0.999833	-1.3342	0.0174536	0.605677	-1.29622	0.0170487	0.999973
AL109766.1	-0.0835037	0.838321	0.999916	-0.0118243	0.976947	0.999901	0.370772	0.366387	0.999678	-1.11232	0.00816896	0.779381	-0.694248	0.10409	0.838141	-1.28273	0.00249141	0.699436
TSSK4	1.26873	0.0278074	0.999916	0.602888	0.288826	0.999901	0.93595	0.101685	0.999678	-0.399737	0.480809	0.999833	0.715671	0.223617	0.91692	-1.27841	0.0266806	0.999973
RPL30P4	0.017383	0.968231	0.999916	0.0215112	0.960692	0.999901	0.965273	0.0299089	0.999678	-1.02569	0.0213405	0.958772	-0.748364	0.100552	0.834318	-1.27484	0.00464577	0.807538
TTTY10	0.348899	0.561236	0.999916	0.450041	0.453987	0.999901	0.772727	0.200442	0.999678	-0.730835	0.22563	0.999833	0.12513	0.839989	0.991747	-1.27131	0.0371391	0.999973
AC009948.1	-0.0321687	0.952178	0.999916	-0.295545	0.582087	0.999901	0.52705	0.327612	0.999678	-1.06791	0.0498434	0.999833	-1.41337	0.0128014	0.591573	-1.26643	0.0207638	0.999973
AC131235.1	-0.419999	0.288195	0.999916	-0.208799	0.596285	0.999901	-0.225303	0.567647	0.999678	-1.01051	0.0122645	0.881015	-1.09256	0.00892498	0.555746	-1.26478	0.00197512	0.637746
AC006970.1	-0.0902304	0.83965	0.999916	0.0719597	0.871795	0.999901	-0.505776	0.25899	0.999678	-1.01702	0.0252911	0.96021	-0.590804	0.202513	0.910048	-1.25993	0.00607381	0.820347
AC099850.3	0.276436	0.53778	0.999916	-0.534465	0.235398	0.999901	0.589902	0.190839	0.999678	-0.383038	0.393859	0.999833	-0.317734	0.493203	0.967231	-1.25993	0.00630347	0.820347
OCSTAMP	-0.123696	0.804149	0.999916	-0.236537	0.63557	0.999901	-0.971254	0.0548788	0.999678	-0.383038	0.443477	0.999833	0.120729	0.814784	0.991747	-1.25993	0.0136219	0.999973
USP27X-AS1	0.0191907	0.975363	0.999916	0.0338218	0.956594	0.999901	0.211849	0.733277	0.999678	-1.64195	0.0100315	0.830612	-0.478028	0.457507	0.966679	-1.2522	0.0472051	0.999973
PABPC1L	0.264436	0.614663	0.999916	0.204594	0.696791	0.999901	0.0588	0.910786	0.999678	-0.916573	0.0842529	0.999833	-1.06968	0.0518863	0.748343	-1.24875	0.019817	0.999973
TNFAIP8	0.111023	0.788865	0.999916	0.0632092	0.878802	0.999901	-0.267081	0.520003	0.999678	-0.13975	0.736101	0.999833	-0.568395	0.187394	0.89916	-1.24461	0.00367101	0.731308
RPL21P120	-0.304724	0.285649	0.999916	-0.0740272	0.794506	0.999901	-0.101841	0.72016	0.999678	-0.782376	0.00742048	0.761809	-0.961428	0.00163387	0.354135	-1.24253	4.26989e-05	0.241007
SUMO2P17	0.169421	0.78355	0.999916	-0.0704175	0.909078	0.999901	-0.235811	0.702288	0.999678	-0.737075	0.234485	0.999833	0.463009	0.46826	0.966679	-1.22969	0.0494598	0.999973
AL158050.1	-0.306493	0.326468	0.999916	-0.334589	0.28442	0.999901	-0.368487	0.238882	0.999678	-1.31524	7.15684e-05	0.430615	-0.586276	0.0717671	0.798048	-1.226	0.000191936	0.273401
AC090602.1	0.159941	0.662388	0.999916	-0.104623	0.775086	0.999901	0.296393	0.419282	0.999678	-1.15933	0.00226259	0.609419	-1.02992	0.0080628	0.550993	-1.22599	0.00130024	0.622994
SNRPFP1	-0.352509	0.357402	0.999916	-0.376503	0.325844	0.999901	-0.167561	0.660966	0.999678	-0.878368	0.024098	0.958772	-1.05937	0.00892712	0.555746	-1.21717	0.00212397	0.642237
NME2P1	0.173056	0.630192	0.999916	-0.00648192	0.985599	0.999901	0.171487	0.633292	0.999678	-0.902381	0.0141155	0.901248	-0.769688	0.0412547	0.718265	-1.21202	0.00120072	0.622994
GAPDHP60	-0.413231	0.373333	0.999916	0.266105	0.565753	0.999901	0.38611	0.405328	0.999678	-1.69537	0.000479523	0.4335	-1.46751	0.00302358	0.437592	-1.202	0.0113037	0.993314
RPL9P3	0.221159	0.589471	0.999916	0.184566	0.652367	0.999901	-0.266272	0.516114	0.999678	-0.920452	0.0273799	0.978227	-0.817061	0.0568395	0.764842	-1.18738	0.00492461	0.820347
PTP4A1P7	-0.153244	0.724459	0.999916	-0.227955	0.600239	0.999901	-0.397655	0.361656	0.999678	-1.21334	0.00666606	0.755118	-1.13333	0.0136948	0.597025	-1.18709	0.00787171	0.873988
RPL3P7	0.0913311	0.822137	0.999916	0.125091	0.758204	0.999901	0.0449979	0.911797	0.999678	-0.951334	0.0217679	0.958772	-0.413024	0.326865	0.950998	-1.1673	0.00531036	0.820347
RILPL2	0.269296	0.612362	0.999916	0.137733	0.795367	0.999901	0.00784329	0.988214	0.999678	-0.387227	0.466717	0.999833	-1.08493	0.0513307	0.747472	-1.15915	0.0319993	0.999973
TGFB1	0.0527626	0.923091	0.999916	-0.201138	0.712988	0.999901	-0.176652	0.746617	0.999678	-1.0669	0.0543253	0.999833	-1.0356	0.0701789	0.79327	-1.15523	0.0376625	0.999973
AP000708.1	-0.441065	0.381569	0.999916	0.285976	0.569825	0.999901	-0.205721	0.682489	0.999678	-0.168847	0.737009	0.999833	0.592295	0.256396	0.926562	-1.15005	0.0248444	0.999973
TBC1D2	0.444803	0.326894	0.999916	0.327917	0.469072	0.999901	0.268251	0.553413	0.999678	-0.285516	0.528247	0.999833	-0.598033	0.203198	0.910048	-1.14429	0.0134424	0.999973
RPS20P14	0.254466	0.591057	0.999916	0.0589509	0.900835	0.999901	-0.0406542	0.931518	0.999678	-0.821831	0.0859037	0.999833	-1.11499	0.0252819	0.665252	-1.14001	0.0183702	0.999973
RPSAP8	0.232253	0.637036	0.999916	0.158314	0.747619	0.999901	-0.176367	0.720014	0.999678	-1.06237	0.0337904	0.999833	-0.938569	0.0682498	0.786714	-1.13282	0.0239424	0.999973
TNPO1P3	-0.515464	0.264943	0.999916	0.223583	0.627369	0.999901	-0.296024	0.520696	0.999678	-0.71777	0.122251	0.999833	0.0979632	0.836782	0.991747	-1.1304	0.0163147	0.999973
AC073343.2	0.640412	0.199556	0.999916	0.0133495	0.97853	0.999901	0.749382	0.134236	0.999678	-0.665138	0.182964	0.999833	-0.58534	0.255799	0.926562	-1.11344	0.0276258	0.999973
SUMO2P6	0.206107	0.677065	0.999916	0.837924	0.0937617	0.999901	0.127532	0.796558	0.999678	-0.660088	0.184964	0.999833	-0.697192	0.175506	0.894327	-1.10916	0.0277536	0.999973
HIST1H4K	0.0331243	0.952207	0.999916	-0.16922	0.759541	0.999901	-0.320591	0.562362	0.999678	-0.320343	0.562664	0.999833	-0.342112	0.549638	0.977013	-1.10831	0.0482489	0.999973
API5P1	-0.0922335	0.814825	0.999916	-0.493231	0.213061	0.999901	0.270993	0.492074	0.999678	-0.715781	0.0726085	0.999833	-0.579441	0.157553	0.872698	-1.09417	0.00691755	0.848803
HNRNPA1P4	-0.15387	0.693279	0.999916	-0.184176	0.636949	0.999901	0.367137	0.348025	0.999678	-1.54312	0.000180592	0.430615	-1.47147	0.00049689	0.300494	-1.09268	0.00648082	0.831361
NPM1P39	-0.0953024	0.798098	0.999916	-0.147196	0.692871	0.999901	0.0347708	0.925624	0.999678	-0.738202	0.0508501	0.999833	-1.04232	0.00839117	0.555746	-1.09112	0.00453257	0.802818
AC090114.1	0.0535323	0.909181	0.999916	-0.0358911	0.939036	0.999901	0.00837414	0.985762	0.999678	-1.36225	0.00488871	0.7422	-0.942401	0.0553524	0.764151	-1.0828	0.0237083	0.999973
PFN1P1	-0.076471	0.847758	0.999916	-0.23994	0.547436	0.999901	-0.181462	0.648924	0.999678	-1.16122	0.00471543	0.726822	-1.19442	0.00489318	0.499129	-1.08035	0.0082991	0.878304
PTMAP2	0.185955	0.603778	0.999916	0.357234	0.32012	0.999901	0.402168	0.263512	0.999678	-1.02025	0.00567083	0.755118	-1.01774	0.00745232	0.550993	-1.07807	0.00357571	0.729488
RBM8B	-0.096488	0.755252	0.999916	0.120591	0.6969	0.999901	0.0803451	0.795173	0.999678	-0.774451	0.0144785	0.901248	-0.903466	0.00606987	0.511349	-1.07771	0.000855753	0.517517
ELK3	-0.362173	0.480147	0.999916	-0.330531	0.519196	0.999901	-0.307781	0.548274	0.999678	-0.678493	0.188038	0.999833	-0.845194	0.113567	0.846662	-1.07721	0.0385196	0.999973
EEF1A1P38	-0.152889	0.737795	0.999916	-0.670649	0.145099	0.999901	-0.210549	0.644904	0.999678	-0.670527	0.145171	0.999833	-0.754822	0.113007	0.846662	-1.07516	0.0210635	0.999973
RPS13P2	0.0679172	0.811011	0.999916	0.0352917	0.901098	0.999901	0.0787295	0.78165	0.999678	-0.983308	0.000912314	0.4335	-0.919929	0.00248693	0.424329	-1.07306	0.000328725	0.344879
RPSAP12	-0.182954	0.595977	0.999916	0.050782	0.882885	0.999901	0.190183	0.581568	0.999678	-1.00484	0.00472157	0.726822	-1.03048	0.00502206	0.499129	-1.07162	0.00269083	0.700981
EIF2S3B	-0.182859	0.635746	0.999916	-0.242992	0.529351	0.999901	0.0403763	0.916636	0.999678	-0.462665	0.232923	0.999833	-0.571426	0.154856	0.871913	-1.06985	0.00702076	0.853304
AC012354.2	-0.321058	0.50461	0.999916	-0.0553124	0.908328	0.999901	0.321799	0.50363	0.999678	-0.905157	0.0629933	0.999833	-0.876334	0.0809878	0.811656	-1.06902	0.0289233	0.999973
HIST1H1C	-0.393569	0.379511	0.999916	-0.19454	0.663294	0.999901	-0.081173	0.855762	0.999678	-0.599951	0.182078	0.999833	-0.71859	0.122767	0.851276	-1.04577	0.0217639	0.999973
MAMDC2-AS1	0.276157	0.593197	0.999916	0.370451	0.474002	0.999901	0.388598	0.452709	0.999678	-0.240469	0.641719	0.999833	-0.160714	0.763319	0.991747	-1.0413	0.0470551	0.999973
ARHGEF26	0.128047	0.761961	0.999916	0.128439	0.761256	0.999901	0.00299915	0.994337	0.999678	0.129465	0.759408	0.999833	-0.672161	0.127105	0.851439	-1.03935	0.0161888	0.999973
LRRC37A4P	0.323724	0.348174	0.999916	0.323006	0.349237	0.999901	0.0655908	0.848759	0.999678	-1.10984	0.00188826	0.56099	-1.26936	0.00064375	0.303214	-1.03655	0.0035522	0.729488
AC092115.1	-0.335461	0.353211	0.999916	-0.355813	0.324972	0.999901	-0.23815	0.509147	0.999678	-0.75567	0.039041	0.999833	-0.584376	0.119757	0.851176	-1.02185	0.00588031	0.820347
LINC02427	0.358554	0.431155	0.999916	-0.426974	0.349016	0.999901	-0.00918884	0.983866	0.999678	-0.467144	0.305872	0.999833	-0.582597	0.217329	0.91541	-1.00184	0.0303924	0.999973
AL162151.2	-0.0404589	0.91878	0.999916	0.0588751	0.882043	0.999901	0.00971782	0.980459	0.999678	-0.677489	0.0912688	0.999833	-1.70288	9.21378e-05	0.29273	-1.00077	0.0137664	0.999973
YWHAQP6	0.312247	0.465066	0.999916	0.0659775	0.877085	0.999901	0.0380229	0.928971	0.999678	-1.09612	0.0121616	0.881015	-0.374211	0.397131	0.961309	-1.00033	0.0215966	0.999973
AC137767.1	-0.143147	0.72403	0.999916	0.112046	0.782227	0.999901	-0.0191666	0.962276	0.999678	-0.520697	0.201662	0.999833	-0.479922	0.254087	0.925991	-0.992411	0.0166308	0.999973
GAPDHP65	-0.231544	0.541816	0.999916	-0.0186057	0.960846	0.999901	0.0510343	0.892889	0.999678	-1.1555	0.00321018	0.671294	-1.26592	0.00185649	0.378685	-0.991916	0.0107262	0.97229
MEGF11	-0.288848	0.557276	0.999916	-0.319182	0.516768	0.999901	-0.278926	0.570861	0.999678	-0.890315	0.07362	0.999833	-0.674709	0.186953	0.89916	-0.986236	0.0481267	0.999973
GAPDHP40	-0.374436	0.38756	0.999916	-0.144386	0.738373	0.999901	-0.216544	0.616609	0.999678	-0.988955	0.0248193	0.958772	-1.08296	0.017645	0.605677	-0.986008	0.0252361	0.999973
AC011495.1	-0.0715348	0.865907	0.999916	0.308276	0.467665	0.999901	0.285679	0.500795	0.999678	-0.462615	0.276978	0.999833	-0.855894	0.0539133	0.75727	-0.983777	0.0228458	0.999973
POTEF	0.0760643	0.839888	0.999916	0.174418	0.64339	0.999901	0.311527	0.409145	0.999678	-0.888956	0.0207362	0.958772	-1.49984	0.000254097	0.300494	-0.983692	0.0108421	0.973969
RPL7P23	-0.123146	0.711781	0.999916	-0.11598	0.727849	0.999901	0.0214175	0.948739	0.999678	-0.727254	0.0320096	0.999833	-1.19812	0.00086156	0.303214	-0.9795	0.00439517	0.800251
AC022150.4	0.28544	0.396157	0.999916	0.357773	0.288308	0.999901	0.345621	0.304857	0.999678	-0.19583	0.559901	0.999833	0.116685	0.736493	0.991747	-0.975933	0.00480253	0.817397
RPL13AP20	-0.10476	0.806081	0.999916	-0.387979	0.364688	0.999901	0.149651	0.725895	0.999678	-1.04151	0.0169682	0.923869	-1.28275	0.00479272	0.499129	-0.975237	0.0249981	0.999973
TCP1P1	0.166566	0.642295	0.999916	0.469574	0.192929	0.999901	0.498048	0.167651	0.999678	-0.911513	0.0130125	0.901248	-0.687609	0.0667638	0.786126	-0.974355	0.00814657	0.878304
HSPA8P9	0.00706919	0.986623	0.999916	0.0396858	0.925012	0.999901	0.688308	0.106093	0.999678	-0.638063	0.133575	0.999833	-0.569231	0.194233	0.903971	-0.966612	0.0245876	0.999973
TMEM183B	0.206251	0.448047	0.999916	0.324561	0.234055	0.999901	0.358205	0.189597	0.999678	-0.967318	0.00065693	0.4335	-0.787065	0.00637676	0.511786	-0.961222	0.000705883	0.48123
AL122020.1	0.069038	0.881932	0.999916	-0.0790854	0.864908	0.999901	-0.181651	0.696104	0.999678	-0.624857	0.181851	0.999833	-1.03938	0.0334634	0.708731	-0.957384	0.0426569	0.999973
TUBBP2	0.0389374	0.922292	0.999916	0.0614732	0.877613	0.999901	0.155555	0.696918	0.999678	-1.13069	0.00595784	0.755118	-1.16032	0.0062857	0.511786	-0.957381	0.0189006	0.999973
AL139100.1	0.274192	0.415427	0.999916	-0.310914	0.356125	0.999901	-0.117945	0.725555	0.999678	-0.718435	0.035486	0.999833	-0.907762	0.0107561	0.569187	-0.954857	0.00578343	0.820347
AC009245.1	-0.146078	0.643579	0.999916	-0.0672057	0.831317	0.999901	0.298951	0.344946	0.999678	-0.687643	0.032251	0.999833	-1.21554	0.000386694	0.300494	-0.954133	0.00344478	0.729488
SUMO2P1	0.350733	0.255372	0.999916	0.130009	0.671975	0.999901	0.0358942	0.906874	0.999678	-1.05546	0.000980085	0.436731	-0.925034	0.00468373	0.499129	-0.948863	0.00282374	0.721025
AL139095.2	0.763165	0.0396534	0.999916	1.09763	0.00361398	0.999901	1.32587	0.000528462	0.999678	-1.19891	0.00158051	0.51467	-0.850216	0.0269266	0.675255	-0.937781	0.0121509	0.999973
AC097263.1	0.471516	0.179411	0.999916	0.361625	0.301778	0.999901	0.731515	0.0391114	0.999678	-1.10431	0.00226737	0.609419	-0.814957	0.0265106	0.669007	-0.932892	0.0091902	0.931842
EXTL3-AS1	1.08857	0.0172992	0.999916	1.34251	0.00368798	0.999901	0.977455	0.0318546	0.999678	-0.586936	0.192411	0.999833	-0.298583	0.518931	0.97125	-0.93172	0.0404543	0.999973
KIF6	0.675713	0.0641191	0.999916	0.527287	0.146462	0.999901	1.01029	0.00643246	0.999678	-0.60334	0.0974263	0.999833	-0.511475	0.172369	0.890224	-0.929895	0.0117766	0.999973
OAZ3	0.572045	0.216432	0.999916	0.863071	0.0641481	0.999901	0.494804	0.28428	0.999678	-0.496289	0.282849	0.999833	-0.948035	0.04945	0.742302	-0.92892	0.0467801	0.999973
MT-TE	0.0438521	0.909153	0.999916	-0.0814682	0.832138	0.999901	0.912614	0.0200604	0.999678	-0.734023	0.0595832	0.999833	-1.15754	0.00471924	0.499129	-0.92353	0.018679	0.999973
COX6A1P2	-0.131702	0.662827	0.999916	-0.157021	0.603292	0.999901	0.129873	0.667222	0.999678	-0.853884	0.00602112	0.755118	-0.913621	0.00453192	0.496881	-0.923431	0.00311343	0.721881
AL158201.1	-0.755051	0.105702	0.999916	-0.0455159	0.92152	0.999901	-0.0805137	0.861663	0.999678	-1.10149	0.0195909	0.958772	-1.09265	0.0247973	0.662745	-0.923131	0.049038	0.999973
OVCH1-AS1	0.228349	0.421286	0.999916	0.18796	0.507661	0.999901	0.449882	0.115685	0.999678	-0.437914	0.125509	0.999833	-0.84892	0.00491754	0.499129	-0.919169	0.00178829	0.637746
RBMXP2	0.645726	0.0337628	0.999916	0.17515	0.558378	0.999901	0.401469	0.182199	0.999678	-0.768952	0.0120649	0.881015	-0.766511	0.015274	0.600903	-0.917271	0.00302586	0.721881
EIF4A1P2	0.110587	0.758508	0.999916	0.152507	0.67168	0.999901	0.0487838	0.892087	0.999678	-0.948978	0.0101162	0.830612	-0.7279	0.0534779	0.756635	-0.914515	0.0130342	0.999973
IQUB	-0.133321	0.745279	0.999916	-0.110353	0.787978	0.999901	-0.073983	0.856894	0.999678	-1.21442	0.00414827	0.725148	-1.58912	0.000362329	0.300494	-0.902028	0.0308278	0.999973
AP001107.9	0.391853	0.381059	0.999916	0.0930993	0.834683	0.999901	0.015758	0.971816	0.999678	-0.375291	0.401398	0.999833	-0.630345	0.17444	0.893682	-0.901065	0.0466652	0.999973
NACA3P	-0.147337	0.682519	0.999916	0.320734	0.374404	0.999901	0.470523	0.194099	0.999678	-0.409166	0.258052	0.999833	-1.14466	0.00295114	0.437592	-0.898759	0.0147145	0.999973
RPL13AP25	-0.21526	0.553663	0.999916	-0.194878	0.59173	0.999901	0.0095799	0.978943	0.999678	-0.653152	0.0754748	0.999833	-0.99135	0.00999863	0.561977	-0.898452	0.0155434	0.999973
PPIAP6	0.417164	0.343598	0.999916	0.426044	0.333496	0.999901	0.301626	0.492769	0.999678	-0.49958	0.25743	0.999833	-0.682206	0.135885	0.85895	-0.897253	0.0442072	0.999973
RANP1	-0.0429215	0.883554	0.999916	0.197293	0.501505	0.999901	0.125148	0.669532	0.999678	-0.888424	0.00337333	0.688199	-0.847058	0.00656589	0.517117	-0.896946	0.00309842	0.721881
SMC5-AS1	0.0506593	0.895427	0.999916	0.345426	0.371576	0.999901	0.340492	0.378405	0.999678	-0.683924	0.0795153	0.999833	-0.331083	0.406963	0.962742	-0.896581	0.0226254	0.999973
SRP14P2	0.0318958	0.916395	0.999916	0.0212437	0.944258	0.999901	-0.0990805	0.744445	0.999678	-0.562005	0.0678664	0.999833	-1.12894	0.000596364	0.303214	-0.891771	0.00446056	0.802818
CYSRT1	0.729515	0.0891118	0.999916	0.751156	0.0802265	0.999901	0.500941	0.240268	0.999678	-0.211431	0.618608	0.999833	0.513343	0.244096	0.922116	-0.887315	0.0396837	0.999973
AC115837.1	-0.159974	0.69677	0.999916	0.301689	0.463076	0.999901	0.0749508	0.855066	0.999678	-0.69244	0.0950133	0.999833	-0.866141	0.0442953	0.729064	-0.887036	0.0336434	0.999973
UBE2SP1	-0.177424	0.611244	0.999916	-0.382823	0.274497	0.999901	-0.165535	0.635285	0.999678	-0.876158	0.0141208	0.901248	-0.860743	0.0193566	0.611455	-0.883842	0.0133343	0.999973
MIS18BP1	0.152155	0.621189	0.999916	0.198613	0.519173	0.999901	0.00999128	0.974089	0.999678	-0.26912	0.38305	0.999833	-0.242959	0.445634	0.966679	-0.881992	0.00540809	0.820347
CDC37L1-DT	-0.00825182	0.984047	0.999916	0.128772	0.755103	0.999901	0.138223	0.737782	0.999678	-0.982956	0.0197095	0.958772	-0.809988	0.0609521	0.781405	-0.880717	0.0359216	0.999973
PSMC1P9	-0.604835	0.126086	0.999916	0.401306	0.307674	0.999901	0.017707	0.963954	0.999678	-0.308569	0.432062	0.999833	-0.95431	0.0209532	0.633573	-0.875839	0.0282493	0.999973
HMGN1P36	0.0583146	0.881909	0.999916	0.0211239	0.957083	0.999901	0.0392184	0.920417	0.999678	-0.443864	0.260487	0.999833	-0.630101	0.123708	0.851276	-0.874206	0.028816	0.999973
GAPDHP1	-0.254681	0.450105	0.999916	-0.00761571	0.981942	0.999901	0.109449	0.745067	0.999678	-1.02926	0.00311704	0.671294	-1.05025	0.00348201	0.45808	-0.873113	0.011382	0.993458
SRRM2-AS1	0.0895998	0.831546	0.999916	0.0976684	0.816642	0.999901	-0.0447839	0.915316	0.999678	-0.823353	0.0539809	0.999833	-0.791895	0.0723063	0.798048	-0.865705	0.0430627	0.999973
EEF1A1P13	-0.0473093	0.884991	0.999916	-0.0102484	0.975001	0.999901	0.0830387	0.799617	0.999678	-0.842914	0.0119213	0.881015	-0.789932	0.0220007	0.642308	-0.86552	0.00992078	0.956947
AC007560.1	0.58816	0.141365	0.999916	0.345072	0.385603	0.999901	0.377749	0.342501	0.999678	-1.04534	0.010203	0.830612	-0.571681	0.166086	0.885213	-0.861149	0.0328972	0.999973
PGAM1P8	-0.210841	0.581241	0.999916	0.0972239	0.799048	0.999901	-0.0618857	0.87125	0.999678	-0.788232	0.0421987	0.999833	-1.18698	0.0036063	0.45808	-0.85913	0.0272579	0.999973
TMX2P1	-0.224913	0.456686	0.999916	-0.187129	0.535466	0.999901	-0.255908	0.397354	0.999678	-0.51003	0.0942925	0.999833	-0.37266	0.23419	0.91692	-0.854672	0.00592841	0.820347
RPL24P8	0.0347153	0.908905	0.999916	-0.127237	0.675142	0.999901	0.263579	0.386348	0.999678	-0.673083	0.0294142	0.999833	-0.853066	0.0081017	0.550993	-0.854517	0.00623239	0.820347
CYP51A1P1	-0.168944	0.560437	0.999916	-0.477366	0.103047	0.999901	-0.193508	0.505046	0.999678	-0.551938	0.0603094	0.999833	-0.733926	0.0165429	0.605677	-0.853613	0.00433029	0.800251
EIF3CL	-0.172767	0.626097	0.999916	-0.34554	0.33115	0.999901	-0.295747	0.405087	0.999678	-0.830703	0.0216156	0.958772	-0.934629	0.0126962	0.591573	-0.85297	0.0184688	0.999973
TPI1P1	-0.513366	0.131958	0.999916	-0.210341	0.534096	0.999901	-0.0363367	0.914339	0.999678	-0.944194	0.00661386	0.755118	-1.05506	0.00346182	0.45808	-0.852901	0.0136755	0.999973
AC016739.1	0.0358282	0.918828	0.999916	-0.0252472	0.942749	0.999901	0.395432	0.262985	0.999678	-0.981767	0.00666042	0.755118	-1.12343	0.00282074	0.426461	-0.852721	0.0176513	0.999973
ABHD17AP1	0.101851	0.798764	0.999916	-0.226962	0.57034	0.999901	-0.0701445	0.860604	0.999678	-1.59263	0.000163241	0.430615	-1.12233	0.00813902	0.551272	-0.851687	0.0360635	0.999973
AL512844.1	-0.0133795	0.961971	0.999916	0.40124	0.155965	0.999901	0.851213	0.00335777	0.999678	-0.563895	0.0477997	0.999833	-0.349674	0.230383	0.91692	-0.848862	0.00344071	0.729488
TPI1P2	0.0172678	0.958865	0.999916	-0.361723	0.282094	0.999901	-0.361768	0.282035	0.999678	-1.16654	0.000851997	0.4335	-0.602272	0.0852136	0.821871	-0.84846	0.0133444	0.999973
AP1G2	0.355872	0.385601	0.999916	0.398239	0.331945	0.999901	0.213107	0.602692	0.999678	-0.718767	0.0823906	0.999833	-0.52939	0.213019	0.914811	-0.848047	0.0413268	0.999973
PSMA6P1	0.285417	0.288818	0.999916	-0.0333269	0.901006	0.999901	-0.0525946	0.844385	0.999678	-0.700027	0.0108498	0.868481	-0.482167	0.0850828	0.821871	-0.841322	0.00245097	0.699436
TTYH1	0.030942	0.928452	0.999916	0.0831855	0.809279	0.999901	0.241875	0.48355	0.999678	-0.610557	0.0799691	0.999833	-1.18547	0.00138107	0.340466	-0.83767	0.0174118	0.999973
RPL23AP42	-0.0751333	0.846876	0.999916	0.904466	0.0227055	0.999901	0.125011	0.748044	0.999678	-0.819296	0.0383473	0.999833	-0.992808	0.0157598	0.605677	-0.837537	0.0343714	0.999973
RPS18P12	-0.200283	0.555369	0.999916	0.0971111	0.774695	0.999901	0.137225	0.685956	0.999678	-0.764396	0.0270208	0.978227	-0.739986	0.0378479	0.716043	-0.83571	0.0160027	0.999973
CDCA3	0.0740631	0.800852	0.999916	-0.0175145	0.952423	0.999901	-0.111434	0.704388	0.999678	-0.464769	0.116827	0.999833	-0.137105	0.651487	0.984884	-0.830252	0.00603083	0.820347
AC064799.1	-0.326984	0.431033	0.999916	-0.317372	0.444638	0.999901	-0.273903	0.509209	0.999678	-0.908178	0.0313171	0.999833	-1.3383	0.00255227	0.424329	-0.830146	0.048411	0.999973
THBS2	-0.17518	0.673547	0.999916	-0.00228216	0.995618	0.999901	0.158458	0.703116	0.999678	-0.662888	0.114142	0.999833	0.0179042	0.966737	0.997324	-0.829988	0.049127	0.999973
RPS2P55	0.0819436	0.790613	0.999916	0.0971055	0.753059	0.999901	0.278605	0.368039	0.999678	-0.86583	0.00641434	0.755118	-1.13265	0.000685108	0.303214	-0.827728	0.00899849	0.923463
SERBP1P5	0.172679	0.647285	0.999916	0.166661	0.658767	0.999901	0.184328	0.625304	0.999678	-0.714944	0.0614515	0.999833	-0.854226	0.0313082	0.704039	-0.825864	0.031487	0.999973
RPL3P2	0.0595821	0.860025	0.999916	0.00262079	0.99381	0.999901	0.24835	0.463203	0.999678	-0.801897	0.0201205	0.958772	-0.80073	0.0245035	0.660696	-0.825234	0.0169007	0.999973
RGPD5	0.238414	0.544277	0.999916	-0.277616	0.480373	0.999901	0.517851	0.190142	0.999678	-0.451473	0.252607	0.999833	-0.86047	0.0370287	0.710345	-0.821529	0.0395797	0.999973
AC022400.8	0.239173	0.418464	0.999916	0.105673	0.720188	0.999901	0.222566	0.451351	0.999678	-0.976028	0.00146675	0.51467	-1.27803	7.98982e-05	0.29273	-0.816589	0.00710246	0.853304
SMARCE1P5	0.63533	0.0891188	0.999916	0.146464	0.692024	0.999901	0.32899	0.374769	0.999678	-0.815197	0.0303084	0.999833	-0.485791	0.206057	0.911844	-0.814766	0.0303928	0.999973
NHP2P1	-0.194385	0.608592	0.999916	-0.0182873	0.961538	0.999901	0.185313	0.625387	0.999678	-0.868552	0.0247175	0.958772	-1.01565	0.0114626	0.579737	-0.814133	0.0348609	0.999973
RTN3P1	-0.0975224	0.765024	0.999916	-0.0240687	0.941177	0.999901	-0.0474574	0.884326	0.999678	-0.805414	0.0157888	0.912533	-0.690392	0.0437552	0.727676	-0.811985	0.0149918	0.999973
SCOC-AS1	0.18766	0.629021	0.999916	0.0464318	0.904773	0.999901	0.161031	0.678396	0.999678	-0.460165	0.238272	0.999833	-0.607435	0.133189	0.857332	-0.811409	0.0397277	0.999973
GAPDHP72	-0.505502	0.207132	0.999916	-0.4611	0.249374	0.999901	-0.0197783	0.960391	0.999678	-1.15097	00:07:18.055000	0.7422	-1.07957	0.0105452	0.568666	-0.809739	0.0453112	0.999973
GLYCTK	0.36699	0.205533	0.999916	0.220956	0.444143	0.999901	0.351917	0.224536	0.999678	-0.510462	0.079973	0.999833	-0.223707	0.45331	0.966679	-0.809564	0.00634651	0.820347
AAMDC	-0.201587	0.505367	0.999916	0.00439251	0.9884	0.999901	-0.204876	0.49847	0.999678	0.113262	0.707905	0.999833	-0.0975077	0.754858	0.991747	-0.804321	0.00951235	0.953092
AC012085.1	-0.207297	0.535672	0.999916	-0.282985	0.398428	0.999901	-0.120679	0.718156	0.999678	-0.714336	0.0356388	0.999833	-0.620851	0.0757157	0.80635	-0.80417	0.0185342	0.999973
AL354714.2	-0.0455344	0.885236	0.999916	0.0360907	0.908917	0.999901	0.322282	0.308888	0.999678	-0.856672	0.00822884	0.779381	-0.508333	0.122289	0.851276	-0.803519	0.0129038	0.999973
FTLP3	-0.492628	0.134423	0.999916	0.0452787	0.889627	0.999901	0.0755524	0.816901	0.999678	-0.890728	0.00790926	0.779381	-1.13987	0.00117637	0.321282	-0.803067	0.016107	0.999973
HSPD1P1	-0.209873	0.395036	0.999916	-0.159005	0.518835	0.999901	0.024688	0.920085	0.999678	-0.76612	0.00265473	0.631886	-0.831679	0.0016522	0.354135	-0.802963	0.00169328	0.637746
RPL26P30	-0.142126	0.678361	0.999916	0.364031	0.289929	0.999901	0.379778	0.269751	0.999678	-0.968453	0.00604271	0.755118	-1.39182	0.000196287	0.300494	-0.802279	0.0217436	0.999973
ACTBP2	-0.18132	0.614795	0.999916	-0.0663506	0.853772	0.999901	-0.0925297	0.797182	0.999678	-0.907308	0.0138294	0.901248	-0.976779	0.0104678	0.568666	-0.800813	0.0289785	0.999973
AL590867.2	-0.05615	0.847834	0.999916	-0.101026	0.729998	0.999901	0.291804	0.320457	0.999678	-0.687792	0.0213012	0.958772	-0.704013	0.0224896	0.647905	-0.799353	0.00787004	0.873988
AL451165.2	0.0264619	0.945694	0.999916	-0.131009	0.736051	0.999901	0.371389	0.340769	0.999678	-0.167658	0.666276	0.999833	-0.353111	0.380422	0.958882	-0.796753	0.0435242	0.999973
PPIAP29	-0.0905907	0.746851	0.999916	0.0379021	0.892534	0.999901	0.0137455	0.960921	0.999678	-0.724854	0.011719	0.881015	-0.788846	0.00809808	0.550993	-0.796179	0.00586879	0.820347
ANXA11	-0.257082	0.511565	0.999916	-0.31587	0.420347	0.999901	-0.165701	0.671934	0.999678	-0.717891	0.0698777	0.999833	-0.92777	0.02435	0.659009	-0.795985	0.0450536	0.999973
AL359918.1	-0.191156	0.514523	0.999916	-0.0991505	0.73499	0.999901	-0.0474801	0.871187	0.999678	-0.833956	0.00570278	0.755118	-0.725995	0.0188355	0.608198	-0.795828	0.00817476	0.878304
AC073107.1	0.265457	0.446991	0.999916	0.162461	0.641182	0.999901	-0.0986754	0.777011	0.999678	-0.441694	0.207549	0.999833	-0.931649	0.0115654	0.581948	-0.794176	0.025346	0.999973
AP002784.2	-0.165024	0.610871	0.999916	-0.183385	0.571862	0.999901	0.0361302	0.911212	0.999678	-0.554893	0.0903309	0.999833	-0.436129	0.195534	0.903971	-0.794045	0.016555	0.999973
TUBAP2	0.008218	0.980777	0.999916	0.0188785	0.955859	0.999901	0.0090307	0.978876	0.999678	-0.786683	0.0237604	0.958772	-0.815646	0.0232948	0.659009	-0.792627	0.0227625	0.999973
TCEA1P2	-0.335854	0.241897	0.999916	-0.120351	0.673535	0.999901	0.309423	0.280578	0.999678	-0.766147	0.00897258	0.7899	-0.861948	0.00462604	0.498935	-0.78758	0.00731144	0.853304
AC079250.1	-0.0638783	0.839195	0.999916	0.16024	0.611026	0.999901	0.0855212	0.785897	0.999678	-0.7183	0.0252185	0.96021	-0.933467	0.00535831	0.499129	-0.782407	0.0151305	0.999973
ACTBP11	-0.121505	0.740979	0.999916	0.0834196	0.820428	0.999901	0.040687	0.91183	0.999678	-0.945288	0.0120671	0.881015	-0.933359	0.0162268	0.605677	-0.782133	0.0363787	0.999973
CDCA5	0.14346	0.684083	0.999916	0.00290252	0.993427	0.999901	-0.257896	0.465125	0.999678	-0.879387	0.0147474	0.901248	-0.387054	0.289786	0.936775	-0.78183	0.0293864	0.999973
EIF4BP7	-0.249509	0.468834	0.999916	0.320079	0.353385	0.999901	0.0297636	0.931002	0.999678	-0.668805	0.0551159	0.999833	-0.51699	0.148768	0.867475	-0.781452	0.025769	0.999973
FTLP2	-0.160552	0.682892	0.999916	0.127026	0.746475	0.999901	0.370391	0.347303	0.999678	-0.801818	0.0444686	0.999833	-0.882133	0.0327197	0.708731	-0.780763	0.0501793	0.999973
AC022210.1	-0.11723	0.758274	0.999916	-0.141623	0.7101	0.999901	0.189013	0.619966	0.999678	-1.03701	0.00805975	0.779381	-1.33172	0.00116442	0.321282	-0.778766	0.0441045	0.999973
TLCD1	0.104073	0.767218	0.999916	0.0220034	0.950081	0.999901	0.247634	0.481908	0.999678	-0.571015	0.107742	0.999833	-0.295682	0.416693	0.962742	-0.778635	0.0296353	0.999973
NPM1P6	0.210198	0.521627	0.999916	0.328238	0.318069	0.999901	0.474706	0.150446	0.999678	-0.663076	0.0461904	0.999833	-0.636821	0.0633134	0.781878	-0.776775	0.0202043	0.999973
ASPRV1	0.491326	0.11286	0.999916	0.300082	0.329929	0.999901	0.15721	0.608814	0.999678	-0.906687	0.00421925	0.725148	-0.301998	0.342551	0.956229	-0.776597	0.0134746	0.999973
SIX5	0.511612	0.143631	0.999916	0.239388	0.491002	0.999901	-0.361121	0.299959	0.999678	-0.847424	0.0169084	0.923869	-0.762073	0.0366169	0.708731	-0.773335	0.0286882	0.999973
AC023512.1	-0.243696	0.425835	0.999916	-0.0841257	0.782933	0.999901	0.12497	0.682457	0.999678	-0.796323	0.0109759	0.868481	-1.12601	0.000648808	0.303214	-0.772992	0.0134203	0.999973
FTH1P2	-0.373255	0.196763	0.999916	0.100593	0.726356	0.999901	0.231226	0.422071	0.999678	-0.767579	0.00926929	0.798588	-1.00709	0.00113603	0.321282	-0.771074	0.00896981	0.923463
AL049873.1	-0.125055	0.69659	0.999916	0.175505	0.584432	0.999901	0.0682849	0.831324	0.999678	-0.836606	0.0109318	0.868481	-0.823619	0.015087	0.600903	-0.768619	0.018926	0.999973
LENG8-AS1	-0.496376	0.188003	0.999916	0.0281661	0.94005	0.999901	0.490284	0.193408	0.999678	-0.585882	0.121176	0.999833	-0.659596	0.0918209	0.826336	-0.76458	0.0444659	0.999973
AC018475.1	-0.457223	0.211143	0.999916	-0.11993	0.741516	0.999901	0.354652	0.330928	0.999678	-0.815285	0.0277185	0.983978	-0.89603	0.0194974	0.611455	-0.762291	0.0391191	0.999973
AC010343.1	-0.498239	0.137988	0.999916	-0.0320803	0.923263	0.999901	0.239463	0.473001	0.999678	-0.989474	0.00402311	0.725148	-0.869828	0.013571	0.597025	-0.761855	0.0248868	0.999973
ST13P6	-0.193372	0.494661	0.999916	-0.0980428	0.728806	0.999901	0.0453149	0.872638	0.999678	-0.358376	0.20762	0.999833	-0.72405	0.0153873	0.600903	-0.76123	0.00874677	0.918426
TTC39B	-0.0857644	0.757882	0.999916	-0.0956314	0.731074	0.999901	-0.228301	0.412928	0.999678	-0.0886978	0.749879	0.999833	-0.149916	0.602251	0.981746	-0.759477	0.00789701	0.873988
AC010342.1	-0.0354011	0.91239	0.999916	-0.124525	0.698897	0.999901	0.186934	0.561747	0.999678	-0.0591794	0.854084	0.999833	-0.614782	0.0679208	0.786126	-0.756339	0.0213006	0.999973
LOXL3	-0.0277134	0.922943	0.999916	-0.0286787	0.920268	0.999901	-0.211162	0.462038	0.999678	-0.250102	0.384085	0.999833	-0.223519	0.451189	0.966679	-0.754497	0.0102717	0.966285
FTH1P11	-0.231796	0.447837	0.999916	0.0220924	0.942202	0.999901	0.423533	0.167668	0.999678	-1.02001	0.00130727	0.481216	-1.10345	0.000798405	0.303214	-0.752689	0.0157521	0.999973
RPL10AP6	0.00255216	0.993314	0.999916	0.194351	0.524056	0.999901	0.223449	0.464092	0.999678	-0.64489	0.0373528	0.999833	-0.746866	0.0201337	0.62019	-0.751083	0.0159228	0.999973
LINC01473	-0.0592212	0.859504	0.999916	-0.0171871	0.959026	0.999901	0.425146	0.206581	0.999678	-0.53235	0.115018	0.999833	-0.426103	0.220342	0.91692	-0.749114	0.0279839	0.999973
RPL35P5	-0.0642403	0.839927	0.999916	0.0811445	0.798636	0.999901	0.310091	0.331257	0.999678	-0.903631	0.00581053	0.755118	-0.924856	0.00626109	0.511786	-0.746329	0.0215005	0.999973
CYP51A1P2	0.160408	0.607	0.999916	-0.0997813	0.748849	0.999901	-0.12405	0.690676	0.999678	-0.800273	0.0121944	0.881015	-0.790978	0.0162814	0.605677	-0.74607	0.01908	0.999973
AC009053.1	0.0525848	0.875883	0.999916	-0.0388919	0.90803	0.999901	0.229183	0.496771	0.999678	-0.537825	0.113615	0.999833	-1.07957	0.00273146	0.424329	-0.746007	0.0295921	0.999973
TOMM20P4	-0.450729	0.178766	0.999916	0.143054	0.667601	0.999901	-0.0613296	0.853843	0.999678	-0.404628	0.226789	0.999833	-0.600781	0.0842301	0.821072	-0.745728	0.0279197	0.999973
YTHDF2P1	-0.0989429	0.790669	0.999916	-0.18287	0.623938	0.999901	0.136886	0.713512	0.999678	-0.820483	0.0306178	0.999833	-0.621962	0.109731	0.845916	-0.743067	0.0494973	0.999973
AL109618.1	-0.181599	0.592541	0.999916	0.349128	0.304988	0.999901	0.0477379	0.888008	0.999678	-0.794821	0.0216143	0.958772	-0.954371	0.00802126	0.550993	-0.742194	0.0315172	0.999973
BX679664.3	0.25676	0.418927	0.999916	-0.20586	0.516575	0.999901	0.186472	0.556721	0.999678	-0.446936	0.161564	0.999833	-0.692368	0.0375692	0.714171	-0.739286	0.0222495	0.999973
MTRNR2L2	0.0338263	0.913496	0.999916	0.0370187	0.90537	0.999901	0.0439085	0.887868	0.999678	-0.581587	0.0652938	0.999833	-0.722655	0.0275197	0.678786	-0.732936	0.0211376	0.999973
COX7CP1	0.350861	0.270879	0.999916	0.699441	0.0303634	0.999901	0.441623	0.16694	0.999678	-0.622105	0.0532241	0.999833	-0.636443	0.0555418	0.764151	-0.73246	0.0235948	0.999973
AC078899.1	-0.245167	0.419839	0.999916	-0.222693	0.463514	0.999901	-0.346919	0.254853	0.999678	-0.496006	0.105323	0.999833	-0.767221	0.0166101	0.605677	-0.731488	0.0182246	0.999973
TUBBP1	-0.0336892	0.920058	0.999916	-0.0629812	0.851187	0.999901	-0.0523009	0.876193	0.999678	-0.836118	0.0149358	0.901248	-0.851937	0.0163175	0.605677	-0.730705	0.0324843	0.999973
RPS23P8	-0.174432	0.527507	0.999916	-0.245025	0.375519	0.999901	-0.0377308	0.891135	0.999678	-0.583618	0.0373653	0.999833	-0.917276	0.00192629	0.378685	-0.729323	0.00993926	0.956947
FAM192BP	0.567148	0.0838341	0.999916	0.882871	0.00807169	0.999901	0.666493	0.0430784	0.999678	-0.56101	0.0871603	0.999833	-0.529559	0.117426	0.849813	-0.729089	0.0273683	0.999973
LRP2BP	0.133744	0.688936	0.999916	0.094945	0.77621	0.999901	0.560893	0.0965406	0.999678	-0.623826	0.0652232	0.999833	-0.747142	0.0333547	0.708731	-0.726494	0.0325692	0.999973
AC007541.1	0.379797	0.20627	0.999916	0.345046	0.250358	0.999901	0.318533	0.288257	0.999678	-0.12414	0.677843	0.999833	-0.225279	0.466245	0.966679	-0.720719	0.0182078	0.999973
HSPA8P1	-0.13525	0.649352	0.999916	-0.087929	0.767442	0.999901	0.161951	0.586283	0.999678	-0.779187	0.0106074	0.855312	-0.76217	0.0152916	0.600903	-0.715532	0.0184882	0.999973
ZSWIM1	0.237779	0.380949	0.999916	0.181949	0.502057	0.999901	0.084577	0.754695	0.999678	-0.13644	0.614439	0.999833	0.180888	0.518295	0.97125	-0.7151	0.0100193	0.956947
DYNC1I2P1	-0.17595	0.577951	0.999916	-0.0399034	0.899475	0.999901	-0.331625	0.295809	0.999678	-0.663556	0.0388173	0.999833	-0.752511	0.0238014	0.659009	-0.71383	0.0266211	0.999973
AC115223.1	-0.15897	0.593959	0.999916	-0.018924	0.949344	0.999901	0.102493	0.730895	0.999678	-0.581314	0.0543961	0.999833	-0.773591	0.0140834	0.598929	-0.712474	0.0192176	0.999973
AC073861.1	0.0446237	0.876063	0.999916	0.0415165	0.884628	0.999901	0.0861923	0.763285	0.999678	-0.665125	0.0227117	0.958772	-0.823439	0.00678992	0.520399	-0.706509	0.0157805	0.999973
MAGED4	-0.0166175	0.948345	0.999916	0.0502217	0.844792	0.999901	0.232514	0.366195	0.999678	-0.614991	0.0189434	0.958772	-0.725757	0.00773163	0.550993	-0.70477	0.00754064	0.862741
RPL7AP6	0.268724	0.37259	0.999916	0.149678	0.618702	0.999901	0.63752	0.0369653	0.999678	-0.413218	0.172134	0.999833	-0.754821	0.017389	0.605677	-0.704094	0.0216926	0.999973
ST13P5	-0.620107	0.0731627	0.999916	0.0196845	0.954072	0.999901	0.204833	0.549518	0.999678	-1.05032	0.00299032	0.671294	-0.97895	0.00704825	0.530436	-0.702045	0.0432144	0.999973
FAM92A1P1	-0.330372	0.341143	0.999916	-0.237258	0.493483	0.999901	-0.0691383	0.841574	0.999678	-0.489759	0.159933	0.999833	-0.714294	0.0489525	0.742302	-0.701678	0.0457623	0.999973
YWHAZP4	0.448467	0.179199	0.999916	0.296753	0.372226	0.999901	0.517055	0.122312	0.999678	-0.678541	0.0439552	0.999833	-0.495706	0.151129	0.868302	-0.699736	0.0379477	0.999973
TPT1P9	-0.0680036	0.813381	0.999916	-0.196432	0.495989	0.999901	0.0977179	0.734506	0.999678	-0.708896	0.0161133	0.912533	-0.696758	0.0217977	0.638074	-0.697152	0.0178764	0.999973
ALDH7A1P1	0.0259453	0.939256	0.999916	0.191505	0.574253	0.999901	0.210264	0.537449	0.999678	-1.30351	0.000278651	0.4335	-0.811605	0.0237207	0.659009	-0.694237	0.0447133	0.999973
HNRNPKP2	0.209056	0.442345	0.999916	0.224866	0.40878	0.999901	-0.0388971	0.886089	0.999678	-0.538907	0.0505173	0.999833	-0.378157	0.180666	0.897053	-0.693413	0.0126768	0.999973
UBBP4	-0.148794	0.640901	0.999916	-0.120109	0.706448	0.999901	-0.0628273	0.843759	0.999678	-0.603737	0.0616759	0.999833	-0.902253	0.00770508	0.550993	-0.690428	0.0333151	0.999973
AC079228.1	-0.495078	0.110103	0.999916	-0.106548	0.728498	0.999901	-0.318621	0.301034	0.999678	-0.920667	0.00369203	0.718588	-0.992432	0.00252175	0.424329	-0.689955	0.0273455	0.999973
RPL13P12	-0.0279926	0.917568	0.999916	0.138941	0.607807	0.999901	0.264577	0.329727	0.999678	-0.544777	0.0472951	0.999833	-0.878042	0.00243773	0.424329	-0.689186	0.012869	0.999973
FTH1P16	-0.202915	0.555238	0.999916	0.301991	0.380738	0.999901	0.234928	0.494806	0.999678	-0.767129	0.0283937	0.992034	-0.744773	0.0390242	0.717626	-0.687177	0.0487843	0.999973
RNPS1P1	-0.0294264	0.917923	0.999916	-0.227697	0.426346	0.999901	-0.103506	0.717125	0.999678	-0.761441	0.00939813	0.80373	-1.06414	0.000576271	0.303214	-0.685813	0.0187466	0.999973
HNRNPKP4	0.101703	0.643826	0.999916	0.317104	0.15233	0.999901	0.199374	0.365858	0.999678	-0.539521	0.016388	0.922994	-0.370396	0.106388	0.840629	-0.684603	0.00264359	0.699436
EEF1A1P12	0.0633147	0.835633	0.999916	0.0202366	0.947119	0.999901	-0.0448816	0.883062	0.999678	-0.792709	0.0112848	0.881015	-0.500101	0.116123	0.849462	-0.684302	0.0277466	0.999973
POTEE	0.0102804	0.962916	0.999916	-0.0306549	0.889739	0.999901	0.0905119	0.682468	0.999678	-0.599188	0.00835804	0.780827	-0.724561	0.0022322	0.410846	-0.68301	0.00285293	0.721025
EEF1A1P11	0.0116995	0.964483	0.999916	0.0160304	0.95135	0.999901	0.202077	0.442871	0.999678	-0.781538	0.00398339	0.725148	-0.73957	0.00803738	0.550993	-0.682361	0.0113165	0.993314
TTC25	0.235069	0.452424	0.999916	0.222397	0.47706	0.999901	0.361764	0.248943	0.999678	0.0280478	0.928409	0.999833	-0.00898188	0.977783	0.998343	-0.675099	0.0335955	0.999973
H3F3AP6	-0.0243105	0.938584	0.999916	-0.0709672	0.82207	0.999901	0.176595	0.57614	0.999678	-0.648441	0.0431043	0.999833	-0.822098	0.0137859	0.597025	-0.675022	0.0354758	0.999973
AC099560.2	0.118898	0.689881	0.999916	0.0434941	0.883887	0.999901	0.382235	0.202141	0.999678	-0.622257	0.0398366	0.999833	-0.636223	0.0418815	0.721444	-0.67187	0.0268662	0.999973
HSPD1P4	-0.0500021	0.833156	0.999916	0.0702317	0.767359	0.999901	0.152674	0.520687	0.999678	-0.666005	0.00641308	0.755118	-0.62484	0.0128694	0.591573	-0.671221	0.00603212	0.820347
TUBA1C	-0.135602	0.672328	0.999916	0.100209	0.754539	0.999901	0.0215977	0.946255	0.999678	-0.785957	0.0164548	0.922994	-0.697392	0.0382825	0.717013	-0.670198	0.0396262	0.999973
NPHP4	0.14846	0.637348	0.999916	0.101067	0.748157	0.999901	0.0211311	0.946458	0.999678	-0.388908	0.219166	0.999833	-0.298461	0.360159	0.957323	-0.667774	0.0369317	0.999973
RPLP0P6	-0.0313184	0.915697	0.999916	-0.0124974	0.966305	0.999901	0.152286	0.607098	0.999678	-0.697608	0.0209201	0.958772	-0.834643	0.00790298	0.550993	-0.667741	0.0268088	0.999973
AC020904.2	0.178786	0.498521	0.999916	0.0603177	0.819101	0.999901	-0.0629404	0.811384	0.999678	-0.778279	0.00425598	0.725148	-0.844551	0.00276336	0.425382	-0.66656	0.0135727	0.999973
FAM45BP	0.0130942	0.964684	0.999916	0.168406	0.569535	0.999901	0.26724	0.367691	0.999678	-0.420876	0.157901	0.999833	-0.314993	0.304575	0.943469	-0.665958	0.0271469	0.999973
AC112247.1	0.0937003	0.763291	0.999916	-0.172282	0.58008	0.999901	-0.0650027	0.834477	0.999678	-0.582599	0.0645399	0.999833	-0.911875	0.0058765	0.508307	-0.664446	0.0357351	0.999973
EEF1A1P9	0.067002	0.823791	0.999916	0.100926	0.737375	0.999901	0.234925	0.435947	0.999678	-0.848982	0.0061387	0.755118	-0.745205	0.0189529	0.608198	-0.663942	0.0302426	0.999973
RPL10P16	-0.0163114	0.956213	0.999916	0.118222	0.690842	0.999901	0.0633596	0.831139	0.999678	-0.659256	0.0293711	0.999833	-0.953361	0.00271382	0.424329	-0.662599	0.0285884	0.999973
AC104563.1	0.0905456	0.720103	0.999916	0.222518	0.379734	0.999901	0.217165	0.391237	0.999678	-0.412768	0.105721	0.999833	-0.667232	0.0125814	0.591573	-0.660938	0.0107375	0.97229
MRPS30-DT	0.195588	0.470594	0.999916	0.202928	0.454175	0.999901	0.18089	0.50446	0.999678	-0.193405	0.475542	0.999833	-0.269619	0.336486	0.955627	-0.660609	0.016936	0.999973
MAGED4B	0.00677116	0.978953	0.999916	0.103627	0.686591	0.999901	0.361331	0.162371	0.999678	-0.775401	0.00348195	0.693645	-0.602078	0.0259573	0.666021	-0.653329	0.012964	0.999973
AC004057.1	0.298814	0.261538	0.999916	0.14195	0.592382	0.999901	0.205233	0.439443	0.999678	-0.60175	0.0258462	0.963993	-0.726088	0.00973681	0.561977	-0.652472	0.0160206	0.999973
SEC14L2	-0.0130101	0.967587	0.999916	-0.0269332	0.93296	0.999901	-0.0672036	0.833771	0.999678	-0.747832	0.0221074	0.958772	0.185352	0.575725	0.980859	-0.648665	0.0460573	0.999973
EEF1A1P5	-0.0184209	0.940435	0.999916	0.127039	0.606686	0.999901	0.208466	0.399049	0.999678	-0.589764	0.0191945	0.958772	-0.640019	0.0141133	0.598929	-0.646224	0.0106076	0.97229
HNRNPCP2	0.0870917	0.679018	0.999916	0.166562	0.429524	0.999901	0.167857	0.425963	0.999678	-0.752977	0.000628312	0.4335	-0.702944	0.00184613	0.378685	-0.643771	0.00310013	0.721881
EIF4A1P10	-0.284949	0.325203	0.999916	-0.0515972	0.8581	0.999901	0.029369	0.918933	0.999678	-0.658485	0.0252279	0.96021	-0.923174	0.00279103	0.425771	-0.636508	0.0303187	0.999973
XRCC6P2	-0.0601793	0.840836	0.999916	-0.0316657	0.915833	0.999901	-0.101734	0.734311	0.999678	-0.681089	0.0257773	0.963546	-0.469192	0.132993	0.857332	-0.635818	0.0369417	0.999973
UBE2D3P1	-0.128724	0.635876	0.999916	0.206007	0.449223	0.999901	0.0138061	0.959465	0.999678	-0.680003	0.0144633	0.901248	-0.80612	0.00533203	0.499129	-0.62276	0.0245849	0.999973
RAD50	-0.063464	0.789994	0.999916	0.132053	0.579827	0.999901	0.0422161	0.859366	0.999678	-0.241348	0.312942	0.999833	-0.322481	0.193083	0.903971	-0.618934	0.0112894	0.993314
NDUFB4P12	-0.436379	0.14564	0.999916	-0.225267	0.449837	0.999901	-0.180251	0.545077	0.999678	-0.527241	0.0798465	0.999833	-0.721517	0.0214575	0.638074	-0.618288	0.040844	0.999973
HNRNPA1P10	0.0661103	0.807594	0.999916	0.280427	0.303475	0.999901	0.337493	0.216401	0.999678	-0.299463	0.272102	0.999833	-0.721932	0.0120119	0.591573	-0.615272	0.0261693	0.999973
AC016734.1	-0.0345176	0.907937	0.999916	-0.150994	0.613286	0.999901	-0.217511	0.467071	0.999678	-0.813736	0.00799386	0.779381	-0.91223	0.0041766	0.481105	-0.61389	0.0429506	0.999973
BCLAF1P2	-0.19198	0.370279	0.999916	-0.141843	0.507394	0.999901	-0.431226	0.0468205	0.999678	-0.342002	0.112854	0.999833	-0.39647	0.075978	0.806755	-0.612327	0.00541788	0.820347
PPIAP11	-0.0828309	0.770617	0.999916	-0.0966876	0.733628	0.999901	0.0282132	0.920868	0.999678	-0.674066	0.0201253	0.958772	-0.763975	0.0111215	0.574149	-0.60989	0.0348094	0.999973
KLHDC1	0.0394392	0.885922	0.999916	0.0264181	0.923437	0.999901	0.310159	0.261507	0.999678	-0.468165	0.0920919	0.999833	-0.0794046	0.77986	0.991747	-0.607102	0.0301224	0.999973
HSP90AB3P	-0.0919671	0.726969	0.999916	-0.0365604	0.889561	0.999901	0.224519	0.395093	0.999678	-0.478295	0.0727942	0.999833	-0.667355	0.0164462	0.605677	-0.605366	0.0241799	0.999973
AC046176.1	-0.039967	0.874973	0.999916	0.101492	0.689635	0.999901	0.122628	0.629533	0.999678	-0.512093	0.0470881	0.999833	-0.774984	0.00423522	0.484561	-0.601494	0.020393	0.999973
RBBP4P2	-0.0891987	0.753321	0.999916	-0.0683817	0.809587	0.999901	0.164547	0.562456	0.999678	-0.607006	0.0354795	0.999833	-0.253577	0.388403	0.959722	-0.601394	0.0371559	0.999973
TECRP1	0.164577	0.447199	0.999916	0.147354	0.495963	0.999901	0.170505	0.43108	0.999678	-0.700885	0.00179342	0.559235	-0.657625	0.00432146	0.491109	-0.601026	0.00685915	0.848803
MCM5	0.23292	0.393277	0.999916	0.133664	0.623546	0.999901	-0.158572	0.560517	0.999678	-0.337175	0.217943	0.999833	-0.445444	0.116528	0.849521	-0.599824	0.0304066	0.999973
TWF1P1	-0.262661	0.358972	0.999916	-0.597534	0.0394608	0.999901	-0.348561	0.224621	0.999678	-0.339536	0.236717	0.999833	0.0983761	0.738778	0.991747	-0.59924	0.0389196	0.999973
AP002381.2	-0.293752	0.288757	0.999916	-0.0454557	0.869055	0.999901	0.302684	0.274476	0.999678	-0.190921	0.489423	0.999833	-0.470913	0.101826	0.836854	-0.599132	0.0327702	0.999973
EIF4HP1	-0.0811157	0.749294	0.999916	-0.171865	0.498936	0.999901	-0.116621	0.64605	0.999678	-0.300243	0.239201	0.999833	-0.236515	0.368453	0.958607	-0.593976	0.0218228	0.999973
EIF3C	-0.0607452	0.815443	0.999916	0.0066434	0.97963	0.999901	0.0395762	0.879117	0.999678	-0.524976	0.0469418	0.999833	-0.535703	0.0496488	0.742302	-0.592155	0.025615	0.999973
OLA1P1	-0.381448	0.174888	0.999916	-0.255321	0.361953	0.999901	-0.101796	0.715513	0.999678	-0.636148	0.0254307	0.960894	-0.348576	0.229459	0.91692	-0.585975	0.038974	0.999973
SELENOTP1	-0.385277	0.151423	0.999916	-0.38595	0.150721	0.999901	-0.227969	0.393541	0.999678	-0.497159	0.0655498	0.999833	-0.440968	0.112679	0.846662	-0.578768	0.0328403	0.999973
YWHAZP2	-0.386166	0.153622	0.999916	-0.184815	0.492055	0.999901	-0.0669905	0.803027	0.999678	-0.622338	0.0231131	0.958772	-0.51241	0.0682628	0.786714	-0.575553	0.0351393	0.999973
RPS2P46	-0.0219872	0.937468	0.999916	0.0359861	0.897835	0.999901	0.161166	0.565742	0.999678	-0.460898	0.103588	0.999833	-0.725612	0.0143689	0.598929	-0.574749	0.0435391	0.999973
A1BG-AS1	0.184568	0.511126	0.999916	0.518201	0.068127	0.999901	0.374176	0.185081	0.999678	-0.152046	0.588099	0.999833	-0.306985	0.291435	0.937002	-0.572566	0.0444386	0.999973
AC114491.1	-0.0908783	0.739695	0.999916	-0.0326305	0.905003	0.999901	0.136339	0.618344	0.999678	-0.773967	0.0059886	0.755118	-0.77488	0.00763511	0.550993	-0.57218	0.0395385	0.999973
EEF1A1P6	-0.12249	0.640882	0.999916	0.0517905	0.843542	0.999901	0.0522028	0.842313	0.999678	-0.567332	0.0336195	0.999833	-0.556863	0.0432027	0.726918	-0.568739	0.0331969	0.999973
ZNF212	0.367276	0.0658177	0.999916	0.26727	0.177991	0.999901	0.290837	0.143231	0.999678	-0.196743	0.319874	0.999833	-0.322853	0.116232	0.849462	-0.565916	0.00533214	0.820347
AL596087.1	0.337944	0.163799	0.999916	0.226377	0.348972	0.999901	0.255396	0.291118	0.999678	-0.603948	0.014319	0.901248	-0.562334	0.0266547	0.671642	-0.564756	0.0216331	0.999973
RPS27AP16	-0.239977	0.340145	0.999916	-0.127991	0.610029	0.999901	0.116475	0.642488	0.999678	-0.519988	0.0412704	0.999833	-0.659006	0.0130045	0.591573	-0.550821	0.0309545	0.999973
CACYBPP2	-0.173413	0.452478	0.999916	-0.117758	0.609509	0.999901	0.20037	0.385698	0.999678	-0.367844	0.113725	0.999833	-0.57928	0.017265	0.605677	-0.549513	0.0195099	0.999973
EEF1A1P19	0.119526	0.658712	0.999916	0.368632	0.175869	0.999901	0.283795	0.295988	0.999678	-0.467008	0.0877148	0.999833	-0.499497	0.0773524	0.808523	-0.548958	0.0456336	0.999973
CYP7B1	0.0414683	0.87568	0.999916	-0.0185066	0.944333	0.999901	-0.0338675	0.898326	0.999678	-0.295676	0.266879	0.999833	-0.135117	0.622045	0.982702	-0.545101	0.0429569	0.999973
RGS19	-0.160196	0.470489	0.999916	-0.13255	0.55016	0.999901	-0.105931	0.63282	0.999678	-0.284891	0.201284	0.999833	-0.451252	0.052046	0.7494	-0.543161	0.0165088	0.999973
PDIA3P1	-0.0427341	0.846611	0.999916	0.000936943	0.996615	0.999901	0.144489	0.51371	0.999678	-0.686592	0.0026945	0.631886	-0.641334	0.00634397	0.511786	-0.54274	0.0162878	0.999973
TMEM39A	-0.112818	0.647701	0.999916	-0.00141047	0.995438	0.999901	-0.0386631	0.875471	0.999678	-0.481078	0.0545719	0.999833	-0.293261	0.252319	0.925991	-0.542613	0.0307785	0.999973
H3F3C	0.0654773	0.808311	0.999916	0.166124	0.538715	0.999901	0.0493739	0.854831	0.999678	-0.534537	0.050959	0.999833	-0.651484	0.022051	0.642666	-0.541819	0.0479703	0.999973
LPXN	0.305018	0.24724	0.999916	0.148444	0.571833	0.999901	0.540947	0.042366	0.999678	-0.0107963	0.967161	0.999833	-0.30769	0.258489	0.926562	-0.535479	0.0444288	0.999973
PPIAP31	-0.195466	0.464963	0.999916	-0.174218	0.514694	0.999901	-0.0110319	0.967037	0.999678	-0.653266	0.0167111	0.922994	-0.607229	0.0306345	0.699066	-0.534854	0.0484518	0.999973
RBBP4P1	-0.0114988	0.961421	0.999916	0.0334293	0.888175	0.999901	-0.154125	0.517442	0.999678	-0.654656	0.00741281	0.761809	-0.258954	0.293808	0.937002	-0.531701	0.0281622	0.999973
AFG3L1P	0.128843	0.610542	0.999916	0.294498	0.246365	0.999901	0.20969	0.407947	0.999678	-0.46205	0.07104	0.999833	-0.404809	0.124507	0.851439	-0.526215	0.0405224	0.999973
AC008038.1	0.0370273	0.876492	0.999916	0.0786111	0.741512	0.999901	0.259175	0.278804	0.999678	-0.442342	0.0668444	0.999833	-0.629662	0.0125374	0.591573	-0.526121	0.0301285	0.999973
RAMACL	-0.141857	0.587855	0.999916	0.14815	0.57144	0.999901	-0.0135761	0.958589	0.999678	-0.313183	0.233553	0.999833	-0.694563	0.012119	0.591573	-0.52231	0.0490931	0.999973
SIDT2	0.121841	0.616274	0.999916	0.0875781	0.718561	0.999901	0.0484724	0.841846	0.999678	-0.417094	0.0894995	0.999833	-0.592401	0.0207876	0.630817	-0.509427	0.0391275	0.999973
RPL18AP3	-0.145068	0.508659	0.999916	0.140332	0.52255	0.999901	0.309505	0.160991	0.999678	-0.427214	0.0546273	0.999833	-0.56757	0.0143289	0.598929	-0.509385	0.0227223	0.999973
HSCB	-0.0695753	0.726065	0.999916	-0.031044	0.875726	0.999901	0.0741585	0.708836	0.999678	-0.142137	0.474802	0.999833	-0.600483	0.00455109	0.496881	-0.508265	0.012455	0.999973
AC113404.3	0.00396576	0.98665	0.999916	-0.0671702	0.776929	0.999901	0.0784057	0.740889	0.999678	-0.165018	0.487084	0.999833	-0.153204	0.532174	0.972634	-0.507084	0.0354691	0.999973
NBPF3	0.167409	0.499106	0.999916	0.21637	0.382914	0.999901	0.112582	0.649123	0.999678	-0.481101	0.055091	0.999833	-0.396458	0.124109	0.851439	-0.503638	0.0449282	0.999973
RPL15P3	-0.141672	0.492726	0.999916	0.0493735	0.810756	0.999901	0.279466	0.178256	0.999678	-0.44958	0.0321796	0.999833	-0.457405	0.0348139	0.708731	-0.499884	0.0176838	0.999973
AC244154.1	-0.179465	0.379422	0.999916	0.0728987	0.720396	0.999901	-0.0216719	0.91522	0.999678	-0.413645	0.0454417	0.999833	-0.323449	0.127507	0.851439	-0.499372	0.0164577	0.999973
NAIF1	0.0855055	0.570783	0.999916	0.0940608	0.532984	0.999901	0.129178	0.392504	0.999678	-0.247028	0.104565	0.999833	-0.203699	0.193542	0.903971	-0.485783	0.00190279	0.637746
P2RX4	0.00803463	0.971061	0.999916	0.0265938	0.904427	0.999901	0.0765205	0.729832	0.999678	-0.597392	0.00864925	0.783196	-0.275706	0.230852	0.91692	-0.483087	0.0321487	0.999973
UQCRFS1P1	0.130356	0.576677	0.999916	-0.0516966	0.824614	0.999901	0.0950145	0.683914	0.999678	-0.548502	0.0212465	0.958772	-0.601901	0.014673	0.600325	-0.482338	0.0418519	0.999973
TRMT61A	0.0835946	0.587992	0.999916	0.0742403	0.630345	0.999901	-0.0247054	0.872666	0.999678	-0.442115	0.0053893	0.754191	-0.478495	0.00365101	0.45808	-0.481992	0.00254891	0.699436
SDHAF2	-0.0244578	0.900005	0.999916	-0.251564	0.199051	0.999901	-0.0505875	0.794982	0.999678	-0.431895	0.0293797	0.999833	-0.464936	0.023442	0.659009	-0.465209	0.0193006	0.999973
AC113935.1	0.286594	0.205546	0.999916	0.310548	0.170609	0.999901	0.66731	0.00408299	0.999678	-0.266682	0.238426	0.999833	-0.501741	0.0339331	0.708731	-0.4639	0.0424522	0.999973
UBTD1	0.136359	0.544584	0.999916	0.247216	0.273548	0.999901	0.171237	0.447106	0.999678	-0.462505	0.0428294	0.999833	-0.159062	0.494111	0.967231	-0.451682	0.0477707	0.999973
SUV39H1	0.128761	0.480592	0.999916	0.113282	0.534713	0.999901	-0.141248	0.439257	0.999678	-0.289134	0.116008	0.999833	-0.508707	0.00853402	0.555746	-0.441054	0.0178696	0.999973
DEPDC5	0.0591283	0.782359	0.999916	0.121464	0.570756	0.999901	-0.0141513	0.947272	0.999678	-0.476771	0.0287464	0.999513	-0.14523	0.51195	0.970052	-0.437127	0.0443342	0.999973
HCFC1R1	-0.0357584	0.859237	0.999916	-0.02516	0.90069	0.999901	-0.158653	0.432416	0.999678	-0.500533	0.0152543	0.901281	-0.506179	0.0174543	0.605677	-0.425572	0.0379173	0.999973
RPL39P3	0.124144	0.520208	0.999916	0.00277819	0.9885	0.999901	0.098932	0.608136	0.999678	-0.297753	0.125835	0.999833	-0.294878	0.142024	0.864256	-0.423709	0.0308801	0.999973
BZW1P2	-0.0386743	0.822093	0.999916	0.0776156	0.651994	0.999901	0.286379	0.0993842	0.999678	-0.278239	0.109169	0.999833	-0.287245	0.109453	0.845916	-0.421227	0.0166094	0.999973
HNRNPA1P48	0.0101666	0.960925	0.999916	0.0812951	0.695405	0.999901	0.274121	0.189457	0.999678	-0.501131	0.018133	0.935263	-0.629204	0.00446601	0.496881	-0.416498	0.0480651	0.999973
ELL	-0.0222422	0.876258	0.999916	0.0967981	0.498703	0.999901	0.00562953	0.968559	0.999678	-0.555241	0.000228875	0.430615	-0.540597	0.000480068	0.300494	-0.415251	0.00482724	0.817397
TMEM175	0.101606	0.576894	0.999916	-0.0752618	0.679246	0.999901	0.112143	0.538146	0.999678	-0.380728	0.0395111	0.999833	-0.458339	0.0170687	0.605677	-0.410836	0.0267054	0.999973
PNMA8C	0.103166	0.596841	0.999916	0.202799	0.299931	0.999901	0.267525	0.172802	0.999678	-0.485011	0.0149929	0.901248	-0.400389	0.0500541	0.742302	-0.409967	0.038507	0.999973
AC007318.1	-0.069917	0.718654	0.999916	-0.153126	0.430984	0.999901	-0.0495764	0.798326	0.999678	-0.375232	0.0564941	0.999833	-0.322362	0.111238	0.845916	-0.408208	0.0384923	0.999973
CNPY4	-0.142236	0.450513	0.999916	-0.0940548	0.617372	0.999901	-0.0961872	0.609434	0.999678	-0.275734	0.145947	0.999833	0.100088	0.606897	0.981746	-0.40679	0.0335836	0.999973
FBXL12	0.00692209	0.969048	0.999916	0.159138	0.373827	0.999901	0.104288	0.559339	0.999678	-0.212315	0.236534	0.999833	-0.355874	0.0569493	0.764842	-0.403822	0.0263824	0.999973
EIF4EP2	0.0726863	0.705399	0.999916	0.145307	0.450552	0.999901	0.176139	0.360903	0.999678	-0.162255	0.399767	0.999833	-0.10169	0.608894	0.981756	-0.40136	0.0399222	0.999973
COG8	0.0988115	0.503465	0.999916	-0.000138612	0.99925	0.999901	0.0266995	0.856311	0.999678	-0.174113	0.240137	0.999833	-0.0304099	0.841793	0.991747	-0.400781	0.00816912	0.878304
SMG9	0.035217	0.809792	0.999916	0.170239	0.24697	0.999901	0.112702	0.44208	0.999678	-0.337242	0.0238245	0.958772	-0.302263	0.0488509	0.742302	-0.384858	0.010342	0.967521
SNRPGP15	0.0749226	0.683182	0.999916	0.0182736	0.92066	0.999901	-0.0858225	0.64021	0.999678	-0.0605709	0.741385	0.999833	-0.116053	0.54096	0.975827	-0.382084	0.0404755	0.999973
KCTD21	0.131798	0.404797	0.999916	-0.0745877	0.636694	0.999901	0.0555001	0.725146	0.999678	-0.0622107	0.693542	0.999833	0.144096	0.378175	0.958882	-0.379892	0.018467	0.999973
HNRNPA1L2	-0.108562	0.506888	0.999916	-0.192923	0.239946	0.999901	0.0542633	0.739768	0.999678	-0.330602	0.0462104	0.999833	-0.343772	0.0448716	0.731291	-0.379133	0.022886	0.999973
DDX23	0.056194	0.735274	0.999916	-0.0163537	0.921583	0.999901	-0.0328482	0.843276	0.999678	-0.319043	0.0582401	0.999833	-0.162696	0.344854	0.956785	-0.36667	0.0302225	0.999973
NADSYN1	0.019509	0.904353	0.999916	-0.0091892	0.954862	0.999901	0.0552525	0.733714	0.999678	-0.374825	0.0236268	0.958772	-0.318245	0.061263	0.781405	-0.366116	0.0269304	0.999973
CHCHD4	0.0020773	0.988517	0.999916	0.225075	0.122355	0.999901	0.214439	0.140699	0.999678	-0.228356	0.117101	0.999833	-0.189514	0.206612	0.911844	-0.365049	0.0135272	0.999973
ZNF426	0.0609555	0.666733	0.999916	0.0249404	0.860055	0.999901	0.0186116	0.895323	0.999678	-0.0745549	0.598524	0.999833	-0.145197	0.322294	0.948617	-0.357642	0.0135504	0.999973
APH1A	-0.0243339	0.889004	0.999916	0.0141571	0.935282	0.999901	0.0221477	0.898919	0.999678	-0.0467162	0.788791	0.999833	0.00649546	0.971235	0.997582	-0.35306	0.0461569	0.999973
CORO1B	-0.105568	0.508341	0.999916	-0.0368196	0.81729	0.999901	-0.00293231	0.985317	0.999678	-0.280261	0.0821488	0.999833	-0.365415	0.0293387	0.692106	-0.351713	0.0302136	0.999973
NEK4	0.0938577	0.499323	0.999916	0.10346	0.456642	0.999901	0.0170296	0.902279	0.999678	-0.188096	0.17807	0.999833	-0.303994	0.0369979	0.710345	-0.350561	0.0135782	0.999973
TAZ	-0.0266731	0.865113	0.999916	0.0641106	0.683219	0.999901	0.0758207	0.62946	0.999678	-0.0638515	0.684429	0.999833	-0.47264	0.00474271	0.499129	-0.347922	0.029594	0.999973
TMEM234	0.15362	0.304618	0.999916	0.241812	0.108196	0.999901	-0.0232502	0.876038	0.999678	-0.313873	0.0383433	0.999833	-0.350022	0.0257808	0.666021	-0.33304	0.0282957	0.999973
HBP1	0.060416	0.670732	0.999916	0.0408805	0.773513	0.999901	0.0945438	0.50629	0.999678	-0.0421005	0.766951	0.999833	0.00221272	0.987968	0.999791	-0.331327	0.0222511	0.999973
TRAF3IP2-AS1	0.0408545	0.762536	0.999916	-0.0101742	0.939999	0.999901	0.152735	0.260817	0.999678	0.00479545	0.971698	0.999833	-0.0453652	0.745401	0.991747	-0.31824	0.0211047	0.999973
WDR46	-0.0290671	0.827578	0.999916	0.00582751	0.965163	0.999901	-0.0414704	0.756034	0.999678	-0.228716	0.0900566	0.999833	-0.208808	0.133243	0.857332	-0.305909	0.0245805	0.999973
MAD2L2	-0.0210543	0.888224	0.999916	-0.0646787	0.666108	0.999901	-0.0467414	0.755089	0.999678	-0.153141	0.30854	0.999833	-0.231572	0.137922	0.85895	-0.301954	0.0471241	0.999973
MOB3A	0.0341135	0.797906	0.999916	0.00488034	0.970771	0.999901	0.0497326	0.709008	0.999678	-0.21783	0.105474	0.999833	-0.350879	0.0128196	0.591573	-0.296404	0.028936	0.999973
RBM28	0.20868	0.152992	0.999916	0.274542	0.061562	0.999901	0.330053	0.0254647	0.999678	-0.262716	0.0733064	0.999833	-0.373038	0.0148877	0.600325	-0.292008	0.0471549	0.999973
RAD23A	-0.117437	0.399796	0.999916	0.0146977	0.91585	0.999901	0.113155	0.417113	0.999678	-0.200273	0.153156	0.999833	-0.403593	0.0063773	0.511786	-0.283537	0.0447789	0.999973
TTLL1	0.0468676	0.704309	0.999916	0.0466606	0.705553	0.999901	0.0222215	0.857139	0.999678	-0.10178	0.410812	0.999833	-0.295745	0.0230367	0.656702	-0.277358	0.0274582	0.999973
GOLGA7	0.0132204	0.919437	0.999916	0.103019	0.4317	0.999901	0.104175	0.426574	0.999678	-0.0990064	0.449769	0.999833	-0.177926	0.19061	0.902558	-0.271816	0.0407612	0.999973
PMS2P1	0.00864636	0.940062	0.999916	-0.0419332	0.715497	0.999901	0.0680447	0.554555	0.999678	-0.14376	0.213968	0.999833	-0.20469	0.0884706	0.826336	-0.265142	0.0238032	0.999973
CSTF1	-0.03941	0.729985	0.999916	0.0154811	0.892111	0.999901	-0.0562072	0.622707	0.999678	-0.0724798	0.526035	0.999833	-0.082247	0.486326	0.966679	-0.260033	0.0254553	0.999973
B3GAT3	-0.19436	0.113782	0.999916	-0.0232692	0.848405	0.999901	-0.0313909	0.796528	0.999678	-0.227684	0.0648912	0.999833	-0.228112	0.0732256	0.799423	-0.249237	0.0438436	0.999973
DVL2	0.101035	0.401776	0.999916	0.168923	0.162997	0.999901	0.045976	0.702192	0.999678	-0.279443	0.022686	0.958772	-0.0743266	0.549985	0.97702	-0.241548	0.0477559	0.999973
MIEF1	0.0739261	0.498965	0.999916	0.108577	0.321682	0.999901	0.0640263	0.557986	0.999678	-0.0758913	0.487666	0.999833	-0.18975	0.0959948	0.829352	-0.240813	0.0302856	0.999973
CDK5RAP1	-0.106318	0.308159	0.999916	-0.110378	0.2902	0.999901	-0.109688	0.293199	0.999678	-0.139366	0.182842	0.999833	-0.0248716	0.81683	0.991747	-0.239375	0.023923	0.999973
ANAPC7	0.104183	0.372925	0.999916	0.0643958	0.581098	0.999901	-0.0945907	0.418282	0.999678	-0.072727	0.533308	0.999833	-0.0330735	0.783679	0.991747	-0.23234	0.049592	0.999973
EIF2B5	0.133405	0.246529	0.999916	0.0618585	0.589518	0.999901	0.166352	0.149612	0.999678	-0.0720637	0.529812	0.999833	-0.075932	0.521718	0.97125	-0.230687	0.0472901	0.999973
TRIM27	0.0779284	0.355211	0.999916	-0.00566766	0.946214	0.999901	-0.0145315	0.862689	0.999678	-0.0816827	0.332668	0.999833	-0.133591	0.127211	0.851439	-0.185194	0.0304265	0.999973
ARHGAP21	0.149434	0.168887	0.999916	0.118309	0.274743	0.999901	0.207537	0.0576945	0.999678	0.0744087	0.490922	0.999833	0.192586	0.087412	0.825271	0.235846	0.0316847	0.999973
CPSF7	0.113903	0.36523	0.999916	0.0821304	0.513195	0.999901	0.11866	0.345681	0.999678	0.098927	0.431277	0.999833	0.11663	0.369522	0.958607	0.25966	0.0416051	0.999973
NUP54	0.00350764	0.97705	0.999916	0.0906422	0.458194	0.999901	0.0351728	0.773056	0.999678	0.330847	0.00827904	0.779381	0.392581	0.00263259	0.424329	0.267454	0.0312239	0.999973
GPATCH11	0.0654934	0.623478	0.999916	0.100742	0.450738	0.999901	-0.0681812	0.609327	0.999678	0.335589	0.0139295	0.901248	0.163857	0.236643	0.917162	0.268811	0.0470242	0.999973
CWF19L1	0.0419948	0.733983	0.999916	0.0446275	0.718014	0.999901	-0.0300454	0.80786	0.999678	0.113401	0.36014	0.999833	0.0200732	0.875031	0.991747	0.278977	0.0267114	0.999973
LARP1B	-0.222687	0.144253	0.999916	0.0277039	0.854689	0.999901	0.0389658	0.796751	0.999678	0.359764	0.0198732	0.958772	0.150035	0.338739	0.955627	0.313234	0.0415816	0.999973
ARPC1A	-0.0249419	0.851441	0.999916	0.0162925	0.902626	0.999901	0.00289643	0.982646	0.999678	0.236439	0.0793566	0.999833	0.0352746	0.797703	0.991747	0.313373	0.0211654	0.999973
MRPS6	-0.214583	0.163927	0.999916	-0.103911	0.497803	0.999901	-0.0508975	0.739495	0.999678	0.36079	0.0209145	0.958772	0.285519	0.0744361	0.803479	0.326414	0.0359793	0.999973
TDRD3	0.0215364	0.895138	0.999916	0.0911081	0.577553	0.999901	0.219261	0.182606	0.999678	0.201799	0.21948	0.999833	0.176705	0.297244	0.939385	0.332792	0.0449409	0.999973
ZCCHC4	0.00838333	0.958775	0.999916	0.258425	0.114544	0.999901	0.250121	0.126437	0.999678	0.205347	0.208246	0.999833	0.356843	0.0363053	0.708731	0.332798	0.0434176	0.999973
KATNBL1	0.000421217	0.997985	0.999916	0.0500271	0.764352	0.999901	0.0455655	0.784813	0.999678	0.267345	0.112532	0.999833	0.20796	0.23023	0.91692	0.33697	0.0467029	0.999973
TMEM185A	0.000982951	0.994555	0.999916	0.0406225	0.778003	0.999901	0.0480258	0.738937	0.999678	0.190562	0.188821	0.999833	0.13393	0.369678	0.958607	0.340142	0.0207473	0.999973
C1orf131	0.347339	0.045486	0.999916	0.298178	0.0847148	0.999901	0.485841	0.00581103	0.999678	0.278516	0.106828	0.999833	0.120176	0.497082	0.967231	0.344071	0.0474931	0.999973
POLM	-0.0828163	0.626274	0.999916	0.0898605	0.597282	0.999901	0.0981219	0.564099	0.999678	0.415617	0.0167519	0.922994	0.3744	0.0360371	0.708731	0.350198	0.0425248	0.999973
PRR13	-0.0847919	0.610272	0.999916	-0.02423	0.884093	0.999901	0.014109	0.932347	0.999678	0.329047	0.0510852	0.999833	0.214643	0.21404	0.914811	0.351675	0.0374663	0.999973
RABGEF1	0.374175	0.0242577	0.999916	0.429406	0.0101678	0.999901	0.395658	0.0174537	0.999678	0.362505	0.0288648	0.999833	-0.00730156	0.965381	0.996758	0.353369	0.0329927	0.999973
HPF1	0.122018	0.526973	0.999916	0.141245	0.464208	0.999901	0.146081	0.449117	0.999678	0.397259	0.0423542	0.999833	0.183018	0.359229	0.957323	0.400372	0.0408128	0.999973
ZNF432	0.149358	0.447292	0.999916	0.137845	0.482936	0.999901	0.201815	0.305385	0.999678	0.496822	0.013374	0.901248	0.164124	0.419097	0.963002	0.407896	0.0407211	0.999973
ZNF347	-0.0258643	0.900873	0.999916	0.102944	0.620374	0.999901	-0.179549	0.388556	0.999678	0.275955	0.186813	0.999833	0.265141	0.219191	0.91692	0.424764	0.0440464	0.999973
FBXO5	0.320634	0.103339	0.999916	0.222272	0.256292	0.999901	0.0602036	0.757394	0.999678	0.476672	0.0167289	0.922994	0.472346	0.0215238	0.638074	0.426308	0.0316242	0.999973
SIRT5	-0.0857216	0.627769	0.999916	0.0642311	0.716263	0.999901	0.0828426	0.639346	0.999678	0.335056	01:28:17.503000	0.999833	0.24722	0.178576	0.895956	0.432657	0.0166109	0.999973
FMR1	-0.0197748	0.898755	0.999916	0.034918	0.82226	0.999901	-0.0866327	0.577681	0.999678	0.318743	0.0435222	0.999833	0.258358	0.111119	0.845916	0.437346	0.00627499	0.820347
SRSF1	0.0429383	0.77292	0.999916	0.0514028	0.729799	0.999901	-0.246455	0.1011	0.999678	0.309872	0.0404351	0.999833	0.296854	0.0568646	0.764842	0.440741	0.00411977	0.775112
SH3YL1	-0.0446841	0.801304	0.999916	0.00798979	0.9641	0.999901	0.108042	0.54334	0.999678	0.43157	0.0174027	0.93194	0.554664	0.00345022	0.45808	0.453502	0.012652	0.999973
GOLGA4	-0.079203	0.656891	0.999916	0.0546248	0.759235	0.999901	0.283845	0.11461	0.999678	0.170532	0.340193	0.999833	-0.0049088	0.978726	0.998359	0.459587	0.0118528	0.999973
DZIP1	0.192825	0.308516	0.999916	0.0129124	0.945414	0.999901	0.313293	0.100207	0.999678	0.107592	0.568825	0.999833	0.352621	0.0738891	0.80094	0.467571	0.01539	0.999973
TIAL1	-0.0463392	0.810394	0.999916	0.00597084	0.975333	0.999901	0.0341379	0.859693	0.999678	0.349371	0.073954	0.999833	0.183548	0.359159	0.957323	0.473114	0.0165862	0.999973
HAUS3	0.0181617	0.926199	0.999916	0.056285	0.774126	0.999901	0.0163929	0.933368	0.999678	0.434015	0.0297628	0.999833	0.489831	0.0179938	0.607003	0.475516	0.0176645	0.999973
MMS22L	0.192143	0.430958	0.999916	0.211608	0.386002	0.999901	-0.187471	0.442196	0.999678	0.444068	0.0716067	0.999833	-0.0710698	0.777539	0.991747	0.497664	0.0441459	0.999973
ILK	-0.0368243	0.869134	0.999916	0.0527026	0.813607	0.999901	0.0488046	0.827161	0.999678	0.79423	0.000683174	0.4335	0.671686	0.00480575	0.499129	0.500885	0.0278498	0.999973
TENT4A	-0.0541937	0.808962	0.999916	-0.472931	0.037972	0.999901	-0.415473	0.0672671	0.999678	0.431086	0.0578542	0.999833	0.659737	0.005689	0.499129	0.510151	0.0255802	0.999973
EMC6	0.0700312	0.777892	0.999916	0.02251	0.92774	0.999901	0.225702	0.364697	0.999678	0.439737	0.0800011	0.999833	0.335935	0.193129	0.903971	0.514321	0.0414617	0.999973
PCNX3	0.11338	0.579137	0.999916	0.144524	0.479893	0.999901	-0.0283145	0.889713	0.999678	0.152844	0.455079	0.999833	0.0239467	0.909627	0.992673	0.530223	0.0113217	0.993314
MSH3	-0.016788	0.931162	0.999916	0.010245	0.957958	0.999901	0.0809704	0.677141	0.999678	0.337943	0.0856031	0.999833	0.428194	0.0360557	0.708731	0.536845	0.00724074	0.853304
RPP38	0.0286877	0.906748	0.999916	0.00670184	0.978167	0.999901	0.0666479	0.78556	0.999678	0.23871	0.331441	0.999833	0.203234	0.422995	0.964324	0.541705	0.0298747	0.999973
PROSER3	0.256286	0.352485	0.999916	0.231339	0.401024	0.999901	0.156253	0.56999	0.999678	0.166152	0.545874	0.999833	0.0909846	0.74865	0.991747	0.546787	0.0499063	0.999973
AC003665.1	0.150808	0.499457	0.999916	0.0837134	0.707406	0.999901	0.0839851	0.706502	0.999678	-0.186413	0.404273	0.999833	-0.370606	0.111087	0.845916	0.552484	0.0154209	0.999973
PURA	0.134629	0.608035	0.999916	0.129247	0.622425	0.999901	0.0494247	0.850521	0.999678	0.27377	0.298507	0.999833	0.537189	0.0507665	0.743522	0.556634	0.0368911	0.999973
SUZ12P1	-0.151297	0.536534	0.999916	-0.0817809	0.738052	0.999901	0.0609404	0.803162	0.999678	0.133326	0.58587	0.999833	0.353853	0.164333	0.884808	0.567174	0.0229638	0.999973
QKI	-0.0940247	0.682328	0.999916	-0.122763	0.593242	0.999901	-0.267664	0.246122	0.999678	0.102861	0.654374	0.999833	0.503358	0.0369468	0.710345	0.582652	0.0132207	0.999973
FBXL13	0.131161	0.626543	0.999916	0.1291	0.631965	0.999901	0.0283402	0.916192	0.999678	-0.0570444	0.832273	0.999833	0.502869	0.0742588	0.802987	0.587977	0.0319899	0.999973
CAPN10-DT	0.488103	0.0476832	0.999916	0.291341	0.232669	0.999901	0.237234	0.330226	0.999678	0.00368714	0.987882	0.999833	0.290342	0.249473	0.923554	0.606222	0.014694	0.999973
FADD	-0.326338	0.0767302	0.999916	-0.298518	0.104746	0.999901	-0.0737245	0.685835	0.999678	0.448504	0.0160702	0.912533	0.218978	0.247039	0.922116	0.608943	0.0013245	0.622994
NKAP	-0.0901249	0.582088	0.999916	-0.302752	0.0677003	0.999901	0.047342	0.772326	0.999678	0.580587	0.000692992	0.4335	0.626532	0.000416053	0.300494	0.64237	0.000200304	0.273401
PPP1R37	-0.0973886	0.714852	0.999916	0.194979	0.465195	0.999901	0.0944441	0.723105	0.999678	-0.201079	0.451409	0.999833	-0.411206	0.138575	0.85895	0.642981	0.0182073	0.999973
CHAF1B	0.103991	0.726395	0.999916	0.101969	0.731501	0.999901	-0.00662958	0.982194	0.999678	-0.194598	0.513086	0.999833	0.741124	0.0181387	0.607003	0.645828	0.0326888	0.999973
ARL2BP	0.0696641	0.79452	0.999916	-0.0830943	0.756089	0.999901	0.239025	0.372875	0.999678	0.571512	0.0356628	0.999833	0.450035	0.106864	0.840971	0.64865	0.017648	0.999973
PABPN1	0.116431	0.618664	0.999916	0.109741	0.638931	0.999901	0.0364044	0.876219	0.999678	0.0806256	0.730209	0.999833	0.0422728	0.861036	0.991747	0.649483	0.00691321	0.848803
WASH3P	0.156509	0.585115	0.999916	0.0565408	0.843498	0.999901	0.155661	0.587147	0.999678	0.444481	0.124049	0.999833	0.370151	0.213649	0.914811	0.650103	0.0259618	0.999973
AC124242.1	0.340059	0.23465	0.999916	-0.333739	0.243368	0.999901	0.0416305	0.883699	0.999678	0.356308	0.213282	0.999833	0.141648	0.630279	0.982702	0.659161	0.0231933	0.999973
AL080317.1	0.166466	0.605896	0.999916	0.0419139	0.896541	0.999901	0.323972	0.31671	0.999678	0.643596	0.0491914	0.999833	0.756827	0.0258138	0.666021	0.660602	0.0436624	0.999973
ORAI3	-0.0356263	0.891028	0.999916	0.12085	0.642372	0.999901	0.167193	0.520888	0.999678	0.324996	0.214082	0.999833	0.433587	0.110049	0.845916	0.687878	0.0099475	0.956947
SORBS3	-0.0491615	0.881977	0.999916	-0.0192059	0.953745	0.999901	-0.172635	0.602479	0.999678	-0.0393936	0.9053	0.999833	0.153261	0.654407	0.984884	0.702517	0.0369754	0.999973
RAP2B	-0.0476184	0.882249	0.999916	0.0419058	0.896288	0.999901	-0.112331	0.726882	0.999678	0.398284	0.218059	0.999833	0.573366	0.0878519	0.825271	0.704708	0.0313235	0.999973
CD58	-0.134864	0.682052	0.999916	-0.186165	0.571962	0.999901	-0.214602	0.514897	0.999678	0.461044	0.164259	0.999833	0.42796	0.210797	0.914811	0.707459	0.0345778	0.999973
LRRC56	0.221956	0.510297	0.999916	-0.243168	0.470878	0.999901	0.116696	0.728915	0.999678	0.267921	0.427132	0.999833	0.334439	0.337895	0.955627	0.715981	0.0364946	0.999973
AC124045.1	0.524371	0.0871882	0.999916	0.0928855	0.759349	0.999901	0.215706	0.477541	0.999678	0.141909	0.639936	0.999833	0.590205	0.0629692	0.781878	0.716974	0.0205361	0.999973
DLG5	0.0853989	0.791557	0.999916	-0.108264	0.737627	0.999901	-0.198714	0.539057	0.999678	-0.0450614	0.88907	0.999833	0.555091	0.0998309	0.833136	0.72803	0.0270282	0.999973
CDC14B	0.0770048	0.824189	0.999916	0.203334	0.557908	0.999901	-0.115728	0.738533	0.999678	0.431978	0.215313	0.999833	0.585909	0.105293	0.839415	0.733902	0.0373216	0.999973
UGDH-AS1	0.31102	0.250042	0.999916	0.077351	0.773768	0.999901	0.456813	0.093035	0.999678	0.543277	0.0467371	0.999833	0.0299331	0.914241	0.992977	0.734738	0.00788639	0.873988
JPX	0.143264	0.559428	0.999916	0.173057	0.48103	0.999901	0.374507	0.129954	0.999678	0.118344	0.62955	0.999833	0.24007	0.344846	0.956785	0.736531	0.00365042	0.731308
UVSSA	0.0727041	0.806998	0.999916	0.0330175	0.911643	0.999901	-0.0146053	0.960849	0.999678	0.285404	0.339151	0.999833	-0.107282	0.727226	0.991747	0.742011	0.0148216	0.999973
ARHGAP29	-0.101658	0.749452	0.999916	0.0222123	0.944348	0.999901	-0.101217	0.750503	0.999678	0.38884	0.224349	0.999833	0.313765	0.341581	0.956229	0.745306	0.0217518	0.999973
HNRNPUL2	-0.139495	0.587096	0.999916	-0.19745	0.442613	0.999901	0.142887	0.578059	0.999678	0.198994	0.43907	0.999833	0.124995	0.637576	0.983071	0.748897	0.00467364	0.807538
MELK	0.0763893	0.838649	0.999916	0.0425364	0.909716	0.999901	-0.278518	0.45872	0.999678	0.409145	0.277564	0.999833	0.890725	0.024242	0.659009	0.762672	0.0453069	0.999973
MIR1244-2	0.24767	0.44982	0.999916	0.172805	0.597582	0.999901	0.142748	0.662683	0.999678	0.760984	0.0225845	0.958772	0.526902	0.122322	0.851276	0.766484	0.0216633	0.999973
PURB	0.235506	0.506115	0.999916	-0.0909432	0.797076	0.999901	0.0381735	0.914032	0.999678	0.487319	0.171247	0.999833	0.872089	0.0194521	0.611455	0.776088	0.0311256	0.999973
ZNF282	-0.13403	0.573011	0.999916	-0.0654361	0.782986	0.999901	-0.309717	0.195131	0.999678	0.262574	0.271179	0.999833	0.38145	0.123523	0.851276	0.778065	0.00162869	0.637746
STAG3	0.210051	0.555526	0.999916	0.213438	0.549188	0.999901	0.392158	0.272676	0.999678	0.0821509	0.817458	0.999833	0.366431	0.320782	0.947081	0.784913	0.0303259	0.999973
METTL25	0.0292729	0.942646	0.999916	0.0669092	0.869392	0.999901	0.308339	0.44956	0.999678	0.648037	0.114705	0.999833	1.40347	0.001344	0.340466	0.822052	0.046646	0.999973
CCT6B	0.0431832	0.895882	0.999916	0.418053	0.20796	0.999901	-0.0208816	0.94954	0.999678	0.56662	0.0894943	0.999833	-0.152483	0.654931	0.984884	0.832535	0.0137403	0.999973
BORA	0.130925	0.743605	0.999916	0.0545146	0.891634	0.999901	-0.19762	0.621701	0.999678	0.87256	0.0321857	0.999833	0.473625	0.254325	0.925991	0.845305	0.0377639	0.999973
WASH2P	0.667076	0.0546634	0.999916	-0.0457915	0.893556	0.999901	0.269502	0.432058	0.999678	0.508452	0.140657	0.999833	-0.112682	0.750046	0.991747	0.857634	0.0143557	0.999973
INTS6-AS1	0.396407	0.293005	0.999916	0.166069	0.658421	0.999901	0.393301	0.296771	0.999678	0.467194	0.215982	0.999833	0.718356	0.0675011	0.786126	0.863447	0.0241251	0.999973
PLCB3	-0.094387	0.769454	0.999916	-0.172912	0.591611	0.999901	-0.218223	0.498629	0.999678	-0.207524	0.519847	0.999833	-0.0222057	0.946775	0.995108	0.873454	0.00828641	0.878304
GCHFR	-0.418957	0.189622	0.999916	-0.21875	0.491324	0.999901	-0.104436	0.742134	0.999678	0.294568	0.354781	0.999833	0.728	0.0292566	0.692106	0.899293	0.00592926	0.820347
WASH7P	-0.273451	0.49951	0.999916	-0.37112	0.360145	0.999901	-0.326496	0.420446	0.999678	0.859974	0.0364908	0.999833	0.522438	0.213734	0.914811	0.947287	0.0216948	0.999973
MESTIT1	-0.41803	0.388713	0.999916	-0.0485387	0.920051	0.999901	-0.239515	0.620726	0.999678	0.733395	0.132758	0.999833	0.469663	0.348862	0.956785	0.97155	0.0478556	0.999973
GEMIN7	0.241258	0.460883	0.999916	0.046456	0.88686	0.999901	-0.090533	0.781618	0.999678	0.493351	0.134143	0.999833	0.574105	0.0923276	0.826336	0.988933	0.00340212	0.729488
EPB41L4B	0.05423	0.884526	0.999916	-0.298381	0.425336	0.999901	-0.298614	0.424976	0.999678	0.564091	0.134208	0.999833	0.477497	0.218498	0.916477	1.00175	0.00899159	0.923463
NPIPB5	-0.0561721	0.907335	0.999916	0.0467917	0.922755	0.999901	0.549824	0.256905	0.999678	-0.149056	0.757492	0.999833	-0.0671296	0.892902	0.992475	1.03979	0.0342227	0.999973
AC006460.2	0.124531	0.794011	0.999916	0.196987	0.679708	0.999901	0.496904	0.299366	0.999678	-0.292301	0.540443	0.999833	1.20219	0.0170051	0.605677	1.03997	0.0321609	0.999973
FAM120C	0.00915061	0.981171	0.999916	-0.0947379	0.807004	0.999901	-0.16485	0.670919	0.999678	0.937787	0.0179601	0.935263	0.316992	0.429878	0.965918	1.04356	0.00878669	0.918426
FILIP1	0.354077	0.442464	0.999916	0.00901896	0.984356	0.999901	0.382169	0.407295	0.999678	0.478148	0.300564	0.999833	-0.310762	0.513865	0.970052	1.04903	0.0253113	0.999973
IGSF5	-0.148625	0.75932	0.999916	-0.42463	0.382631	0.999901	-0.331379	0.495166	0.999678	-0.868948	0.0766994	0.999833	-0.872444	0.0851953	0.821871	1.06754	0.0306439	0.999973
GRIK4	0.0751252	0.858799	0.999916	-0.181599	0.667349	0.999901	-0.0507438	0.904345	0.999678	0.40864	0.334881	0.999833	0.488026	0.265575	0.927115	1.06856	0.0134702	0.999973
HAUS4	-0.202839	0.686062	0.999916	-0.214807	0.668636	0.999901	-0.348788	0.487567	0.999678	0.912011	0.0725174	0.999833	0.945205	0.0716624	0.798048	1.07672	0.0348554	0.999973
AC092747.4	-0.341045	0.487458	0.999916	-0.152021	0.756581	0.999901	0.564283	0.25214	0.999678	0.879065	0.0765048	0.999833	0.558415	0.272514	0.931027	1.0774	0.0309193	0.999973
AC010531.6	1.07039	0.0348781	0.999916	0.537722	0.282999	0.999901	0.963933	0.0566449	0.999678	0.048063	0.923212	0.999833	0.491964	0.341306	0.956229	1.08166	0.0330703	0.999973
RPL41P1	0.0237146	0.918288	0.999916	-0.0200701	0.930811	0.999901	-0.00644398	0.97776	0.999678	0.820153	0.000695881	0.4335	0.665009	0.0068132	0.520399	1.08308	1.38066e-05	0.201042
CASC9	0.0814677	0.858575	0.999916	0.173974	0.703683	0.999901	0.631492	0.170271	0.999678	0.728011	0.114751	0.999833	0.348348	0.461749	0.966679	1.08364	0.0202802	0.999973
PINLYP	-0.373748	0.384151	0.999916	-0.13117	0.75944	0.999901	0.017903	0.96665	0.999678	-0.536101	0.213325	0.999833	-0.051631	0.907102	0.992475	1.08433	0.0134164	0.999973
TGFBR3	-0.00266723	0.996117	0.999916	0.389006	0.478692	0.999901	0.0306372	0.955421	0.999678	-0.10449	0.848817	0.999833	0.710336	0.212442	0.914811	1.0961	0.0488437	0.999973
PLCH2	0.312329	0.559532	0.999916	0.374081	0.484857	0.999901	0.521219	0.331282	0.999678	0.182642	0.732701	0.999833	0.210016	0.703903	0.989116	1.10581	0.0417896	0.999973
PLXDC1	-0.356045	0.486009	0.999916	-0.303229	0.552758	0.999901	-0.738261	0.151082	0.999678	-0.231013	0.650899	0.999833	1.011	0.0585326	0.77141	1.10672	0.033049	0.999973
SYTL2	-0.39505	0.437069	0.999916	-0.157586	0.75609	0.999901	-0.578277	0.25655	0.999678	0.151842	0.764708	0.999833	1.13289	0.0336408	0.708731	1.10757	0.0319435	0.999973
PCDHGB2	-0.514707	0.246728	0.999916	-0.099454	0.822023	0.999901	-0.252483	0.568369	0.999678	0.304834	0.49124	0.999833	0.642964	0.162372	0.882355	1.12043	0.0133333	0.999973
FGF1	-0.0945092	0.844361	0.999916	0.0323957	0.946341	0.999901	-0.183545	0.703122	0.999678	0.920116	0.0593879	0.999833	0.426204	0.392787	0.960423	1.12183	0.0223886	0.999973
NEXN	-0.163077	0.747764	0.999916	-0.241487	0.634084	0.999901	-0.344387	0.497648	0.999678	1.29684	0.012531	0.887814	1.19443	0.0253157	0.665252	1.1491	0.0261734	0.999973
IDH1-AS1	-0.276003	0.557539	0.999916	-0.11765	0.802373	0.999901	-0.31891	0.498168	0.999678	0.284545	0.545444	0.999833	0.808628	0.0993924	0.831338	1.15921	0.0158998	0.999973
SEMA6A-AS1	-0.0451882	0.934007	0.999916	0.14841	0.785715	0.999901	0.443022	0.418077	0.999678	1.43879	0.0101887	0.830612	1.57842	0.00653668	0.517117	1.16229	0.0362797	0.999973
C18orf65	-0.0713026	0.894579	0.999916	-0.187797	0.727185	0.999901	-0.00493979	0.992675	0.999678	0.392652	0.466444	0.999833	0.454785	0.414514	0.962742	1.16966	0.0327133	0.999973
DHPS	-0.0484387	0.890574	0.999916	0.0929583	0.791802	0.999901	0.636411	0.0741962	0.999678	0.624596	0.0795951	0.999833	1.26607	0.000862393	0.303214	1.17853	0.00130721	0.622994
SPAG1	0.182766	0.696059	0.999916	0.0306174	0.947792	0.999901	-0.35307	0.451185	0.999678	0.253494	0.588145	0.999833	0.918227	0.0608168	0.781344	1.18779	0.013139	0.999973
MKI67	0.338115	0.564039	0.999916	0.074504	0.89873	0.999901	-0.0608028	0.917277	0.999678	-0.294114	0.615709	0.999833	0.192527	0.750337	0.991747	1.18872	0.0455761	0.999973
UHRF1	0.0113184	0.984455	0.999916	-0.0324546	0.955446	0.999901	-0.322872	0.578793	0.999678	0.335691	0.563849	0.999833	-0.333743	0.578624	0.981723	1.19736	0.042517	0.999973
ANKRD18CP	1.20276	0.0153049	0.999916	1.39811	0.00515149	0.999901	1.61692	0.00135508	0.999678	1.19708	0.0157726	0.912533	0.797344	0.114839	0.847994	1.19965	0.0155594	0.999973
AC079385.3	0.580666	0.227442	0.999916	0.471307	0.326326	0.999901	0.666266	0.166832	0.999678	0.866869	0.0735107	0.999833	1.3127	0.00967446	0.561977	1.20883	0.0136048	0.999973
AC027290.2	0.0315546	0.940788	0.999916	0.186247	0.661306	0.999901	0.451025	0.290445	0.999678	-0.188024	0.658282	0.999833	-0.591746	0.180612	0.897053	1.21689	0.00544771	0.820347
NR4A2	-0.129359	0.788579	0.999916	0.186576	0.699017	0.999901	0.146762	0.760969	0.999678	0.089566	0.852685	0.999833	0.361685	0.468829	0.966679	1.22062	0.0134614	0.999973
SRP54-AS1	0.514228	0.295662	0.999916	0.236026	0.630081	0.999901	0.411299	0.402182	0.999678	0.835552	0.0914728	0.999833	-0.125404	0.804269	0.991747	1.22713	0.0143564	0.999973
C2orf92	0.144118	0.816878	0.999916	0.0576709	0.926158	0.999901	0.0881248	0.887385	0.999678	1.15233	0.0675549	0.999833	0.941251	0.146473	0.866715	1.24311	0.0490827	0.999973
C3orf35	0.824268	0.120028	0.999916	0.244873	0.64134	0.999901	0.645513	0.221747	0.999678	1.2958	0.0158792	0.912533	1.24067	0.0249735	0.664036	1.24683	0.0201085	0.999973
AC009005.1	-0.236117	0.709282	0.999916	0.0437767	0.944864	0.999901	-0.232802	0.713178	0.999678	0.103553	0.870063	0.999833	0.58886	0.369411	0.958607	1.27601	0.047128	0.999973
ERBB4	-0.0537153	0.931281	0.999916	-0.209278	0.736997	0.999901	-0.154914	0.803636	0.999678	1.14723	0.0690271	0.999833	1.62529	0.0136592	0.597025	1.27851	0.0433664	0.999973
PIGCP1	0.5146	0.355728	0.999916	0.407412	0.464126	0.999901	1.38823	0.0146014	0.999678	0.275699	0.619926	0.999833	0.584931	0.309957	0.945731	1.29252	0.0225741	0.999973
CD3EAP	-0.462267	0.152113	0.999916	0.0956201	0.765322	0.999901	-0.0851337	0.790406	0.999678	0.371477	0.248472	0.999833	0.38972	0.241342	0.920326	1.29466	0.000135132	0.273401
CCDC88C	0.103587	0.799112	0.999916	0.159069	0.696037	0.999901	-0.247344	0.543872	0.999678	0.389494	0.340189	0.999833	0.746282	0.0794507	0.811162	1.31719	0.00183378	0.637746
AC007240.1	0.0782137	0.905367	0.999916	-0.411687	0.532069	0.999901	-0.168268	0.79817	0.999678	0.0813472	0.901595	0.999833	0.71601	0.294216	0.937002	1.32632	0.0471014	0.999973
ACACB	0.390186	0.407787	0.999916	0.229249	0.626112	0.999901	0.360761	0.443877	0.999678	0.633964	0.180507	0.999833	0.980813	0.0467632	0.738658	1.33698	0.00577271	0.820347
AC006213.1	0.485614	0.271518	0.999916	-0.307054	0.485667	0.999901	0.331526	0.451721	0.999678	1.37764	0.00249729	0.612145	1.19974	0.0100514	0.561977	1.347	0.00306803	0.721881
SPDYE1	0.241983	0.69296	0.999916	0.325457	0.595567	0.999901	0.363462	0.553444	0.999678	0.577805	0.347147	0.999833	1.38846	0.031188	0.70227	1.36033	0.0292442	0.999973
DLGAP1-AS1	-0.160189	0.792184	0.999916	-0.0512211	0.932844	0.999901	-0.00713714	0.990631	0.999678	1.3982	0.0241241	0.958772	1.10718	0.081456	0.813263	1.39182	0.0247526	0.999973
SYS1-DBNDD2	1.04663	0.0496024	0.999916	0.894221	0.0921509	0.999901	0.352233	0.503123	0.999678	1.55395	0.00416375	0.725148	1.21099	0.0284842	0.687069	1.39338	0.00973907	0.956947
LINC01270	-0.380489	0.578591	0.999916	0.127594	0.852083	0.999901	-0.357942	0.601253	0.999678	-0.163131	0.811591	0.999833	1.91615	0.00834525	0.555746	1.4012	0.0438245	0.999973
AC073941.1	-0.211624	0.709881	0.999916	-0.14982	0.79221	0.999901	-0.0908301	0.873085	0.999678	0.43899	0.441096	0.999833	1.26403	0.0344646	0.708731	1.40131	0.0159771	0.999973
LINC00997	0.0378678	0.943537	0.999916	-0.402159	0.452928	0.999901	-0.238094	0.656334	0.999678	-0.209674	0.695107	0.999833	0.00123798	0.998212	0.99984	1.4176	0.00979012	0.956947
KRT80	-0.608946	0.389621	0.999916	-0.729164	0.30354	0.999901	-0.82035	0.247564	0.999678	1.34932	0.0593648	0.999833	0.0312987	0.965766	0.996758	1.42341	0.0470352	0.999973
AMY2B	0.487138	0.308564	0.999916	0.163723	0.731264	0.999901	0.641822	0.181012	0.999678	0.710168	0.139457	0.999833	0.313396	0.525051	0.971634	1.4257	0.00378682	0.745608
MYOF	-0.484618	0.493003	0.999916	-0.10172	0.885386	0.999901	-0.213754	0.762027	0.999678	-0.0439406	0.950347	0.999833	0.517778	0.478439	0.966679	1.46102	0.0416195	0.999973
AC074194.1	0.166285	0.747074	0.999916	0.627299	0.226203	0.999901	0.205982	0.689595	0.999678	1.12467	0.0320839	0.999833	1.07127	0.0475725	0.742302	1.4628	0.00586801	0.820347
DLGAP5	0.114816	0.834924	0.999916	0.0902494	0.869878	0.999901	-0.243645	0.658521	0.999678	0.282853	0.607993	0.999833	-0.202377	0.722295	0.990749	1.47464	0.00914141	0.931842
SPDYE21P	0.553709	0.285685	0.999916	-0.0899868	0.861663	0.999901	0.323623	0.531438	0.999678	1.1937	0.0234525	0.958772	0.770624	0.151854	0.868419	1.47611	0.00553799	0.820347
AC021739.2	0.344866	0.581112	0.999916	0.261501	0.675514	0.999901	0.182243	0.770421	0.999678	-0.0660459	0.91575	0.999833	0.54109	0.402821	0.96175	1.48131	0.0201625	0.999973
PXDC1	-0.594259	0.390572	0.999916	-0.576427	0.404869	0.999901	-0.859045	0.21597	0.999678	0.523022	0.449564	0.999833	1.29687	0.0724968	0.798048	1.4819	0.0348401	0.999973
XRCC2	0.133035	0.848596	0.999916	0.236839	0.734031	0.999901	0.167003	0.810612	0.999678	0.403476	0.563039	0.999833	-0.155994	0.828479	0.991747	1.49497	0.0349654	0.999973
UNC13C	1.06961	0.121869	0.999916	1.37268	0.0484168	0.999901	0.901454	0.191125	0.999678	1.00979	0.143762	0.999833	0.743362	0.295631	0.937413	1.50164	0.0313296	0.999973
SAMD13	0.427738	0.546857	0.999916	0.118129	0.867683	0.999901	0.215814	0.760902	0.999678	-0.322372	0.649583	0.999833	1.47467	0.0474156	0.74204	1.50499	0.0368844	0.999973
OLFML2A	-0.153281	0.828137	0.999916	0.0156631	0.982298	0.999901	-0.109177	0.877104	0.999678	1.91838	0.00818864	0.779381	0.261051	0.720545	0.990649	1.50588	0.0360013	0.999973
AL035413.1	-0.0342863	0.953909	0.999916	0.705003	0.237189	0.999901	0.18296	0.757843	0.999678	0.814835	0.172651	0.999833	1.02515	0.0979461	0.829633	1.51102	0.0129031	0.999973
AR	0.112919	0.87863	0.999916	0.120358	0.870704	0.999901	-0.00216633	0.997662	0.999678	-0.000927153	0.998999	0.999833	-0.0219569	0.977071	0.998309	1.51383	0.0438768	0.999973
AC079848.2	0.867609	0.240511	0.999916	0.454228	0.53732	0.999901	0.463832	0.528778	0.999678	0.715332	0.332366	0.999833	0.61282	0.421015	0.96369	1.52049	0.0418643	0.999973
LINC02340	0.303954	0.661302	0.999916	0.0681504	0.921693	0.999901	0.0419172	0.951787	0.999678	0.644242	0.354337	0.999833	2.07494	0.00497425	0.499129	1.54342	0.028871	0.999973
PARP9	0.230122	0.756848	0.999916	-0.0449992	0.951704	0.999901	-0.494879	0.506082	0.999678	1.48095	0.0495775	0.999833	1.48722	0.0561234	0.764564	1.54592	0.0406526	0.999973
GBP1	0.0903015	0.902189	0.999916	-0.217497	0.767291	0.999901	-0.810893	0.27199	0.999678	0.923152	0.21172	0.999833	-0.762342	0.317152	0.946676	1.55871	0.0369986	0.999973
GLI2	-0.0744934	0.918599	0.999916	-0.447676	0.539677	0.999901	-0.54299	0.457258	0.999678	0.959811	0.190838	0.999833	1.08851	0.151602	0.868419	1.5708	0.0341982	0.999973
AC017028.2	0.0966625	0.89741	0.999916	-0.421172	0.574705	0.999901	0.394466	0.599144	0.999678	0.802112	0.286754	0.999833	1.30298	0.0960715	0.829352	1.57839	0.0383966	0.999973
FAM71F1	0.0581645	0.940178	0.999916	0.700188	0.367804	0.999901	0.652776	0.400933	0.999678	-0.360832	0.641802	0.999833	1.26196	0.118507	0.850181	1.59301	0.0430844	0.999973
POU3F3	0.110207	0.882739	0.999916	0.099571	0.893984	0.999901	0.0761985	0.918767	0.999678	1.2768	0.0910099	0.999833	0.562214	0.467326	0.966679	1.59537	0.0358156	0.999973
STBD1	-0.0650434	0.901364	0.999916	-0.343117	0.513911	0.999901	-0.433401	0.410103	0.999678	1.30473	0.0151157	0.901248	1.7662	0.00172308	0.364711	1.60311	0.00315474	0.721881
IRF9	0.120083	0.872882	0.999916	-0.310489	0.679268	0.999901	-0.937928	0.214109	0.999678	0.274229	0.71494	0.999833	1.13718	0.145778	0.866715	1.60649	0.0353726	0.999973
AL359715.1	0.194557	0.793264	0.999916	-0.0455115	0.951104	0.999901	0.0855712	0.908214	0.999678	0.787846	0.290539	0.999833	0.942549	0.22169	0.91692	1.61863	0.032174	0.999973
AC067852.5	0.0145501	0.979889	0.999916	-0.341656	0.554429	0.999901	-0.041269	0.943	0.999678	-0.0694405	0.904243	0.999833	-0.451863	0.449629	0.966679	1.63196	0.00604628	0.820347
AL359715.2	0.397576	0.603913	0.999916	0.204773	0.789157	0.999901	0.669797	0.383031	0.999678	2.64186	0.000947233	0.4335	1.2612	0.114321	0.847117	1.64383	0.0348373	0.999973
TLR3	0.357757	0.624063	0.999916	0.22561	0.757137	0.999901	-0.180172	0.804914	0.999678	-0.260217	0.721367	0.999833	-0.613448	0.416768	0.962742	1.64568	0.0268413	0.999973
ZFPM1	-0.286298	0.66048	0.999916	-0.323208	0.620051	0.999901	-0.308393	0.636145	0.999678	0.342233	0.599651	0.999833	0.521389	0.439516	0.966679	1.66096	0.0128023	0.999973
AC099066.2	-0.637105	0.441267	0.999916	-0.354326	0.667962	0.999901	-0.559662	0.498529	0.999678	2.22778	0.00861406	0.783196	0.281795	0.741195	0.991747	1.66788	0.0466292	0.999973
TCF19	0.273646	0.600101	0.999916	-0.0476899	0.927127	0.999901	-0.23856	0.64756	0.999678	-0.205639	0.69347	0.999833	-0.213565	0.691972	0.987662	1.67049	0.00202705	0.637746
LOXL4	-0.248233	0.749745	0.999916	0.282905	0.716241	0.999901	-0.318096	0.6828	0.999678	2.57026	0.00149447	0.51467	1.0803	0.181941	0.897159	1.6817	0.0336606	0.999973
ECHDC2	0.237972	0.690435	0.999916	0.1953	0.743733	0.999901	0.325783	0.585802	0.999678	1.09231	0.0709024	0.999833	1.98652	0.001932	0.378685	1.68377	0.00617931	0.820347
GPR1	-0.00453897	0.994412	0.999916	-0.0612001	0.924774	0.999901	-0.0167816	0.979343	0.999678	0.523527	0.420408	0.999833	1.571	0.0215557	0.638074	1.71819	0.009802	0.956947
IGFBP7-AS1	0.510847	0.462697	0.999916	0.551913	0.427676	0.999901	0.698913	0.315878	0.999678	1.1967	0.0882625	0.999833	1.69557	0.0205991	0.628141	1.71819	0.0155478	0.999973
AL132780.2	0.592462	0.48684	0.999916	0.48407	0.569707	0.999901	0.766117	0.369172	0.999678	1.01771	0.234001	0.999833	-0.0117527	0.989328	0.999791	1.72579	0.045722	0.999973
MIR924HG	-0.430026	0.560334	0.999916	0.0110705	0.988023	0.999901	-0.252599	0.732076	0.999678	1.67775	0.0256649	0.961469	0.546348	0.474234	0.966679	1.73092	0.0214949	0.999973
AC009549.1	-0.18487	0.784459	0.999916	-0.273664	0.685667	0.999901	-0.791932	0.243687	0.999678	1.12123	0.100588	0.999833	1.978	0.0059504	0.510211	1.7311	0.0124173	0.999973
TEKT3	-0.154535	0.842708	0.999916	0.234631	0.763249	0.999901	-0.0366337	0.962476	0.999678	1.2086	0.124068	0.999833	0.361854	0.65313	0.984884	1.74707	0.027691	0.999973
FAM201A	0.782838	0.302007	0.999916	0.692458	0.360825	0.999901	0.439187	0.561449	0.999678	0.633801	0.40269	0.999833	2.32896	0.00387343	0.464755	1.76908	0.0217623	0.999973
ACOX2	-0.00710022	0.992394	0.999916	-0.168981	0.820548	0.999901	-0.115608	0.876657	0.999678	0.530179	0.477418	0.999833	1.18822	0.125989	0.851439	1.77373	0.0197259	0.999973
LBX2-AS1	0.0460007	0.958245	0.999916	0.369043	0.674674	0.999901	-0.369245	0.674507	0.999678	0.495425	0.573314	0.999833	-0.610176	0.502234	0.96805	1.79307	0.0445426	0.999973
PKD1P6	-0.0940758	0.902918	0.999916	-0.30458	0.693069	0.999901	-0.184409	0.811059	0.999678	1.75542	0.0255928	0.960894	0.613808	0.442163	0.966679	1.79708	0.0224161	0.999973
SDC4	-0.016664	0.984594	0.999916	-0.326707	0.705158	0.999901	-0.473724	0.583489	0.999678	-0.0509207	0.952949	0.999833	-0.339295	0.703713	0.989116	1.80234	0.0399353	0.999973
FMO4	0.270071	0.760246	0.999916	0.0514518	0.953624	0.999901	0.262839	0.766473	0.999678	1.82366	0.0425059	0.999833	0.851503	0.353187	0.957323	1.80589	0.0444972	0.999973
ZFP36L1	0.0654403	0.920546	0.999916	0.158111	0.809593	0.999901	0.145198	0.824874	0.999678	0.382934	0.559941	0.999833	0.0899715	0.894411	0.992475	1.82487	0.00686737	0.848803
ABHD15	-0.242904	0.757574	0.999916	-0.233528	0.766647	0.999901	-0.387601	0.622536	0.999678	0.838466	0.288591	0.999833	2.07859	0.0125639	0.591573	1.82708	0.0228389	0.999973
ZNF469	0.237327	0.735065	0.999916	-0.0855138	0.902917	0.999901	-0.289089	0.680258	0.999678	0.921046	0.191826	0.999833	-0.131622	0.855819	0.991747	1.83748	0.0106156	0.97229
CTDSP1	0.463121	0.494247	0.999916	0.151701	0.822544	0.999901	0.268002	0.692068	0.999678	0.858983	0.20683	0.999833	0.487151	0.486503	0.966679	1.86127	0.00744643	0.857758
POU6F2-AS2	0.706899	0.331003	0.999916	0.199072	0.783562	0.999901	0.61131	0.400112	0.999678	-1.15135	0.115517	0.999833	0.351726	0.638748	0.983437	1.89679	0.0107061	0.97229
ATP6V0C	0.235875	0.620036	0.999916	0.498493	0.29631	0.999901	0.343824	0.470335	0.999678	1.40027	0.0043223	0.725148	1.08935	0.0294333	0.693176	1.92925	0.000127873	0.273401
MERTK	-0.0176992	0.98406	0.999916	0.0786191	0.929285	0.999901	0.231049	0.794289	0.999678	1.01242	0.255488	0.999833	0.847115	0.356292	0.957323	1.99097	0.0274386	0.999973
SLC15A3	-0.356866	0.651105	0.999916	-0.329941	0.675833	0.999901	-0.636952	0.420377	0.999678	0.693126	0.380799	0.999833	0.721172	0.377486	0.958882	2.00359	0.0131146	0.999973
AL078602.1	0.154228	0.858294	0.999916	0.076874	0.929079	0.999901	0.0712469	0.934258	0.999678	1.21598	0.162341	0.999833	0.445896	0.617645	0.982702	2.02274	0.0217707	0.999973
AC108472.1	0.169545	0.795755	0.999916	-0.00554034	0.993249	0.999901	0.412006	0.529866	0.999678	0.503385	0.443102	0.999833	-0.497162	0.463388	0.966679	2.04304	0.00260443	0.699436
ECM2	0.216113	0.783402	0.999916	0.156814	0.84188	0.999901	0.205485	0.793802	0.999678	1.37834	0.0830372	0.999833	1.72932	0.0363067	0.708731	2.05308	0.0108711	0.973969
LIME1	-0.281509	0.663929	0.999916	-0.0348584	0.957062	0.999901	0.105518	0.870546	0.999678	-0.700031	0.281747	0.999833	0.362352	0.588454	0.981723	2.05739	0.00219156	0.643931
WHAMM	-0.0469658	0.925496	0.999916	-0.533876	0.289867	0.999901	-0.522164	0.300488	0.999678	1.25572	0.0145772	0.901248	1.6628	0.00202294	0.384882	2.07448	9.99452e-05	0.273401
LINC01471	0.999431	0.188526	0.999916	0.224213	0.766555	0.999901	0.106571	0.887752	0.999678	2.50036	0.00145891	0.51467	0.965877	0.21833	0.916	2.11006	0.006619	0.842703
PAQR6	0.130019	0.867405	0.999916	-0.0880693	0.909955	0.999901	0.0270797	0.972258	0.999678	1.04894	0.180981	0.999833	1.58699	0.0519283	0.748343	2.14652	0.00735737	0.853304
MORN5	0.278599	0.613026	0.999916	0.344988	0.531349	0.999901	0.131957	0.810536	0.999678	0.843568	0.128711	0.999833	1.22382	0.0344149	0.708731	2.16127	0.000200153	0.273401
CICP14	0.0779758	0.896484	0.999916	-0.0353484	0.952966	0.999901	0.13229	0.825325	0.999678	1.05207	0.082729	0.999833	2.04636	0.00149074	0.343234	2.17412	0.000538702	0.456092
CAPSL	0.565186	0.489751	0.999916	-0.261678	0.748773	0.999901	0.126841	0.876598	0.999678	0.567939	0.487646	0.999833	0.241635	0.77469	0.991747	2.18258	0.00925755	0.933084
LINC02055	-0.440088	0.574736	0.999916	-0.521251	0.506535	0.999901	0.31207	0.690545	0.999678	1.11554	0.15766	0.999833	1.22654	0.133066	0.857332	2.20292	0.00631159	0.820347
TEX15	0.156992	0.832719	0.999916	0.542763	0.466091	0.999901	-0.441366	0.553111	0.999678	1.50339	0.0463747	0.999833	0.947665	0.219816	0.91692	2.20821	0.00401949	0.773719
SMIM5	0.462087	0.596547	0.999916	-0.156506	0.85757	0.999901	0.0665568	0.939157	0.999678	1.55951	0.0772397	0.999833	1.63955	0.072312	0.798048	2.23746	0.012282	0.999973
FZD10-AS1	0.275459	0.735801	0.999916	0.223315	0.784401	0.999901	-0.0446466	0.956367	0.999678	1.74119	0.0359495	0.999833	3.17438	0.000344006	0.300494	2.25509	0.00721821	0.853304
AC010729.1	-0.434196	0.641859	0.999916	-0.572929	0.539659	0.999901	-0.745987	0.424996	0.999678	-1.21151	0.19689	0.999833	-0.446262	0.643605	0.984443	2.28886	0.0164272	0.999973
MYH11	0.145482	0.852093	0.999916	-0.562679	0.471664	0.999901	0.12041	0.877355	0.999678	0.0528263	0.946017	0.999833	0.188251	0.815382	0.991747	2.35546	0.00350106	0.729488
LINC02032	-0.229882	0.829331	0.999916	-0.323179	0.761897	0.999901	0.371027	0.727983	0.999678	0.976422	0.361349	0.999833	0.753839	0.494583	0.967231	2.40797	0.0267243	0.999973
VEPH1	0.00560997	0.993747	0.999916	0.154692	0.828928	0.999901	0.270801	0.705343	0.999678	2.48339	0.000893297	0.4335	3.16264	6.00888e-05	0.29273	2.4323	0.00111742	0.622994
AC005532.1	0.235788	0.763357	0.999916	-0.0117523	0.988023	0.999901	-0.0323027	0.967088	0.999678	0.983895	0.211603	0.999833	1.36951	0.0939895	0.826336	2.44643	0.00256613	0.699436
ATOH8	-0.185538	0.829204	0.999916	-0.192944	0.8225	0.999901	-0.235094	0.784614	0.999678	1.06844	0.216777	0.999833	1.63124	0.069885	0.792608	2.46317	0.00545107	0.820347
ADM2	-0.940563	0.398045	0.999916	-1.15668	0.299347	0.999901	-0.93408	0.401287	0.999678	0.637389	0.566262	0.999833	1.41823	0.218872	0.916835	2.46963	0.0289509	0.999973
KCNIP3	-0.0643881	0.937161	0.999916	0.315765	0.699189	0.999901	0.505711	0.536377	0.999678	1.05146	0.20079	0.999833	1.32004	0.121184	0.851276	2.49721	0.00312855	0.721881
MIR31HG	-1.1911	0.175945	0.999916	-0.890658	0.31004	0.999901	-0.804293	0.358946	0.999678	1.10772	0.207741	0.999833	0.747394	0.409038	0.962742	2.57092	0.00437392	0.800251
UBA7	0.259896	0.716565	0.999916	0.694287	0.333622	0.999901	-0.15014	0.83382	0.999678	2.10707	0.00433742	0.725148	0.702476	0.343667	0.956785	2.78355	0.000226697	0.27419
AC092958.1	0.384612	0.61498	0.999916	0.395875	0.604684	0.999901	0.572993	0.454194	0.999678	0.373768	0.624966	0.999833	1.8505	0.0216341	0.638074	2.87472	0.000346243	0.344879
AC019257.1	-0.0560515	0.940206	0.999916	-0.432347	0.563364	0.999901	-0.253014	0.735021	0.999678	1.93002	0.0117486	0.881015	2.17195	0.00629061	0.511786	3.05705	0.00011451	0.273401
AC080023.2	0.345863	0.417809	0.999916	0.0913928	0.830074	0.999901	0.85759	0.0473122	0.999678	-0.827797	0.0552955	0.999833	-0.839274	0.0598855	0.776809	-0.846225	0.0502322	0.999973
VIPAS39	0.107046	0.420808	0.999916	0.0988867	0.456915	0.999901	0.0612099	0.644728	0.999678	-0.154714	0.245906	0.999833	-0.0784279	0.56762	0.979275	-0.263513	0.0503156	0.999973
COLQ	0.517429	0.446101	0.999916	0.360494	0.595104	0.999901	0.0349525	0.95886	0.999678	-0.31304	0.644354	0.999833	-1.13151	0.109543	0.845916	-1.34607	0.0503272	0.999973
MTRNR2L12	-0.0509734	0.843883	0.999916	-0.0257553	0.920731	0.999901	0.155695	0.548003	0.999678	-0.491842	0.0608447	0.999833	-0.659388	0.0159261	0.605677	-0.5137	0.0505174	0.999973
CEP295	0.0523954	0.794717	0.999916	-0.167564	0.406481	0.999901	0.140613	0.485717	0.999678	0.268642	0.185064	0.999833	0.125238	0.54768	0.976651	0.399399	0.0506321	0.999973
NR2F2	0.0324099	0.960349	0.999916	0.0797885	0.902592	0.999901	0.163881	0.801559	0.999678	-0.0421567	0.948439	0.999833	-0.5304	0.432108	0.966041	-1.29326	0.0506384	0.999973
AC004982.2	0.173664	0.752056	0.999916	0.0777332	0.88751	0.999901	0.0032951	0.995215	0.999678	-0.697547	0.207077	0.999833	0.0358107	0.949706	0.995108	-1.0886	0.0509439	0.999973
ACTG1P20	0.0841892	0.854456	0.999916	0.023179	0.959716	0.999901	0.222641	0.627871	0.999678	-0.660696	0.153183	0.999833	-0.0991609	0.834366	0.991747	-0.907233	0.0514171	0.999973
AL080243.2	0.150145	0.718132	0.999916	0.442352	0.289441	0.999901	0.371639	0.372855	0.999678	-0.880801	0.037249	0.999833	-1.26201	0.00442525	0.496881	-0.821549	0.0515261	0.999973
AC106897.1	0.0500149	0.910587	0.999916	-0.0157112	0.971858	0.999901	0.221254	0.619661	0.999678	0.0834536	0.851377	0.999833	0.466488	0.3126	0.946367	0.878575	0.0519035	0.999973
AC063952.1	0.192129	0.818597	0.999916	-0.373148	0.656185	0.999901	-0.411776	0.623292	0.999678	0.0813472	0.922629	0.999833	-0.662267	0.445116	0.966679	-1.6518	0.051968	0.999973
AC104619.1	-0.159279	0.603306	0.999916	-0.0375155	0.90249	0.999901	-0.221415	0.470498	0.999678	-0.351858	0.252902	0.999833	-0.684689	0.0334657	0.708731	-0.603663	0.0520458	0.999973
CAD	-0.0432978	0.827419	0.999916	-0.0159898	0.93582	0.999901	-0.129727	0.514244	0.999678	-0.671677	0.00117245	0.463704	-0.439129	0.0353959	0.708731	-0.391415	0.0520829	0.999973
DPY19L2P3	0.0885255	0.853585	0.999916	-0.608548	0.207318	0.999901	-0.217585	0.65034	0.999678	0.462728	0.336397	0.999833	0.0378697	0.939088	0.994789	0.945244	0.0521324	0.999973
CDC42P6	-0.146413	0.553241	0.999916	0.010308	0.966659	0.999901	0.147744	0.54965	0.999678	-0.311345	0.209539	0.999833	-0.469586	0.0688497	0.789454	-0.485993	0.0521366	0.999973
ESCO1	0.0241989	0.856272	0.999916	0.0705364	0.597886	0.999901	0.200634	0.13649	0.999678	0.254515	0.0602176	0.999833	-0.0237895	0.863173	0.991747	0.263177	0.0522164	0.999973
AL138762.1	0.269125	0.349014	0.999916	0.587808	0.0433779	0.999901	0.48648	0.0929424	0.999678	-0.382345	0.184861	0.999833	-0.573183	0.0561694	0.764564	-0.563938	0.0523287	0.999973
SIGMAR1	-0.10523	0.389959	0.999916	-0.0405276	0.73996	0.999901	-0.148559	0.22618	0.999678	-0.144914	0.237648	0.999833	-0.0623733	0.621208	0.982702	-0.240321	0.0523409	0.999973
AC012618.3	0.687712	0.249597	0.999916	1.69716	0.00558227	0.999901	1.19452	0.0477422	0.999678	-0.860577	0.150834	0.999833	-0.391517	0.524346	0.971634	-1.16933	0.0524873	0.999973
AC079385.2	0.811062	0.213224	0.999916	0.671203	0.302051	0.999901	0.848981	0.192848	0.999678	-0.493122	0.447454	0.999833	-1.07123	0.112916	0.846662	-1.27417	0.0525385	0.999973
SLF1	0.149993	0.428912	0.999916	0.138669	0.464419	0.999901	0.130231	0.491932	0.999678	0.198569	0.295865	0.999833	0.032484	0.868002	0.991747	0.371998	0.0526109	0.999973
DAPK2	-0.161062	0.813994	0.999916	-0.0381269	0.955576	0.999901	-0.655862	0.339632	0.999678	1.02811	0.136415	0.999833	1.49368	0.0377986	0.716043	1.34572	0.052663	0.999973
AL158152.1	0.18865	0.575632	0.999916	0.329345	0.329639	0.999901	0.230463	0.49433	0.999678	-0.304581	0.367047	0.999833	0.925943	0.00950495	0.561977	0.661227	0.0528734	0.999973
RPS2P35	0.059869	0.860854	0.999916	0.29685	0.386105	0.999901	0.572271	0.0973392	0.999678	-0.589972	0.0876277	0.999833	-0.861704	0.0169253	0.605677	-0.670729	0.052921	0.999973
CA3	0.641284	0.424284	0.999916	0.170933	0.830964	0.999901	0.114063	0.886718	0.999678	0.376133	0.638779	0.999833	1.11209	0.181835	0.897159	1.5708	0.0531584	0.999973
NPIPA1	0.327471	0.497604	0.999916	0.514386	0.287946	0.999901	0.291882	0.54533	0.999678	-1.72026	0.000650116	0.4335	-0.0981264	0.843804	0.991747	-0.945391	0.0532044	0.999973
AC027309.2	-0.0159037	0.951019	0.999916	-0.117295	0.650773	0.999901	0.173031	0.504661	0.999678	-0.370142	0.156039	0.999833	-0.308543	0.251156	0.924729	-0.507767	0.0532492	0.999973
CFAP43	0.168469	0.703918	0.999916	0.0357835	0.935629	0.999901	0.188029	0.671492	0.999678	-0.633453	0.15601	0.999833	-0.430893	0.348197	0.956785	-0.868839	0.0532708	0.999973
RMND5B	0.0168058	0.878081	0.999916	-0.00788305	0.942633	0.999901	0.0316248	0.772886	0.999678	-0.238889	0.0321861	0.999833	-0.10642	0.348729	0.956785	-0.214794	0.0532996	0.999973
LLPH	-0.150656	0.387378	0.999916	-0.128605	0.460246	0.999901	-0.0750487	0.666086	0.999678	0.0589536	0.734554	0.999833	0.0366155	0.838444	0.991747	-0.340684	0.0533555	0.999973
Z68871.1	0.403313	0.164921	0.999916	0.136576	0.635932	0.999901	0.261892	0.365117	0.999678	0.0993591	0.730445	0.999833	0.150214	0.614353	0.982332	-0.564736	0.053494	0.999973
INTS12	-0.0893504	0.406639	0.999916	0.0303773	0.777338	0.999901	-0.0363144	0.735352	0.999678	0.167958	0.121259	0.999833	0.10087	0.364815	0.958022	0.210297	0.0535942	0.999973
YWHAZP5	-0.226775	0.485481	0.999916	0.103003	0.751023	0.999901	0.130727	0.687243	0.999678	-0.615282	0.0614272	0.999833	-0.809793	0.0181197	0.607003	-0.634935	0.0537949	0.999973
NUP153	-0.0466844	0.741035	0.999916	0.0277084	0.844451	0.999901	0.0143813	0.918879	0.999678	0.196267	0.167669	0.999833	0.234248	0.11185	0.845916	0.27624	0.0538269	0.999973
C11orf49	0.0147454	0.886971	0.999916	0.0738304	0.477485	0.999901	0.0480496	0.643489	0.999678	-0.181457	0.0837986	0.999833	-0.237515	0.029587	0.69583	-0.202787	0.053998	0.999973
METTL14-DT	0.581375	0.227863	0.999916	-0.0118972	0.980201	0.999901	0.674449	0.162642	0.999678	-0.977022	0.0448252	0.999833	-0.765994	0.125423	0.851439	-0.936899	0.0540704	0.999973
ACTG1P9	-0.512526	0.286156	0.999916	0.0611416	0.898312	0.999901	-0.824553	0.0883506	0.999678	-1.28726	0.0088069	0.788611	-1.47581	0.00385766	0.464755	-0.934606	0.0541594	0.999973
ZNF337	-0.056796	0.853511	0.999916	-0.0189599	0.950846	0.999901	-0.0120939	0.968634	0.999678	-0.508654	0.101697	0.999833	-0.5947	0.0647832	0.781878	-0.600603	0.0542539	0.999973
ABCF1	0.0395029	0.782812	0.999916	0.0108574	0.93959	0.999901	-0.0570941	0.690422	0.999678	-0.314291	0.0312046	0.999833	-0.477097	0.00191183	0.378685	-0.27972	0.0542886	0.999973
RPL15P18	-0.386534	0.241202	0.999916	-0.180642	0.58232	0.999901	-0.0767902	0.814964	0.999678	-0.769077	0.0216427	0.958772	-0.963724	0.00578481	0.504919	-0.640372	0.0543454	0.999973
BRIX1	-0.0435845	0.742783	0.999916	0.0860945	0.517331	0.999901	0.134064	0.314466	0.999678	0.323612	0.017119	0.926121	0.29231	0.0361764	0.708731	0.258908	0.0545568	0.999973
LINC02245	-0.032951	0.914117	0.999916	0.312336	0.308585	0.999901	0.277248	0.365688	0.999678	-0.464956	0.131442	0.999833	-0.984184	0.00262101	0.424329	-0.595602	0.0546537	0.999973
XRN2	0.0532949	0.62662	0.999916	0.046489	0.671233	0.999901	-0.0178633	0.870366	0.999678	0.173925	0.115521	0.999833	0.0825133	0.466514	0.966679	0.213043	0.0550118	0.999973
B3GALT5-AS1	0.136806	0.847465	0.999916	0.0310039	0.965224	0.999901	-0.00350839	0.996064	0.999678	0.366687	0.606469	0.999833	1.03797	0.160924	0.879008	1.38379	0.0550789	0.999973
DDX27	-9.4992e-05	0.99954	0.999916	-0.0206611	0.900227	0.999901	-0.0598356	0.71666	0.999678	-0.186987	0.258846	0.999833	-0.121975	0.474613	0.966679	-0.320574	0.055145	0.999973
RPL7P1	0.0150021	0.948943	0.999916	0.104834	0.654784	0.999901	0.0432293	0.853625	0.999678	-0.445343	0.0607861	0.999833	-0.58691	0.0176946	0.605677	-0.455591	0.0552379	0.999973
TACO1	-0.110973	0.44078	0.999916	-0.244097	0.0927727	0.999901	-0.0550706	0.701562	0.999678	-0.252368	0.082455	0.999833	-0.237732	0.112647	0.846662	-0.279217	0.0553087	0.999973
CD38	0.297629	0.729702	0.999916	0.273863	0.75052	0.999901	-0.0710459	0.934238	0.999678	-0.610539	0.479109	0.999833	-0.102185	0.908555	0.99258	-1.67359	0.0553411	0.999973
AC007114.1	0.117634	0.793688	0.999916	-0.0172664	0.969371	0.999901	0.0113419	0.979878	0.999678	-0.695403	0.125428	0.999833	0.121525	0.793713	0.991747	-0.873737	0.0554354	0.999973
AL354702.1	-0.290194	0.315762	0.999916	-0.187515	0.515877	0.999901	0.0267049	0.92616	0.999678	-0.706685	0.01648	0.922994	-0.648485	0.0323784	0.708731	-0.559735	0.0554887	0.999973
AKAP10	0.0362428	0.794575	0.999916	0.0783791	0.573744	0.999901	-0.0332112	0.811412	0.999678	-0.0201687	0.884773	0.999833	0.0666896	0.643046	0.984422	-0.270316	0.0554981	0.999973
FTH1P10	-0.434974	0.113667	0.999916	-0.257435	0.346116	0.999901	-0.058215	0.830742	0.999678	-0.427216	0.120129	0.999833	-0.615705	0.0316063	0.706988	-0.528934	0.0555048	0.999973
AL035587.1	-0.0916574	0.764045	0.999916	-0.278794	0.3626	0.999901	-0.163617	0.592353	0.999678	-0.602001	0.0519672	0.999833	-0.139434	0.658647	0.985219	-0.592696	0.0555933	0.999973
AC130689.1	0.15771	0.594705	0.999916	-0.0539394	0.855473	0.999901	-0.000633409	0.998293	0.999678	-0.252823	0.394529	0.999833	-0.641179	0.0392695	0.718089	-0.574084	0.0559538	0.999973
CCDC127	-0.0218412	0.891123	0.999916	0.103558	0.516978	0.999901	0.0419527	0.792647	0.999678	-0.122971	0.441909	0.999833	-0.151372	0.360051	0.957323	-0.309171	0.0560787	0.999973
ADH5P4	-0.177149	0.650094	0.999916	-0.0511818	0.895649	0.999901	-0.0992062	0.799356	0.999678	-0.720398	0.0683788	0.999833	-0.278203	0.490957	0.967231	-0.755917	0.0561432	0.999973
TNFAIP3	-0.218436	0.644824	0.999916	-0.294414	0.534675	0.999901	-0.288778	0.542502	0.999678	0.290533	0.540059	0.999833	0.952895	0.0548465	0.762595	0.916721	0.0562791	0.999973
HMGN2P46	-0.0624126	0.806338	0.999916	0.127258	0.617431	0.999901	-0.142267	0.576659	0.999678	-0.690585	0.00828492	0.779381	-0.700361	0.00948632	0.561977	-0.49269	0.0563338	0.999973
AC024293.1	0.155777	0.603427	0.999916	0.261733	0.383667	0.999901	0.257893	0.390644	0.999678	-0.404688	0.179748	0.999833	-0.712731	0.0239799	0.659009	-0.579303	0.056564	0.999973
NDP	0.172199	0.810922	0.999916	-0.033073	0.963343	0.999901	0.0551892	0.93887	0.999678	-0.177744	0.804957	0.999833	-1.28616	0.0872212	0.825271	-1.39034	0.0567895	0.999973
RBM42	0.0678172	0.654755	0.999916	0.0946277	0.532963	0.999901	0.0537904	0.722755	0.999678	-0.302173	0.0495031	0.999833	-0.362461	0.023275	0.659009	-0.292774	0.0567995	0.999973
AC245595.1	-0.137802	0.827528	0.999916	-0.0553524	0.930251	0.999901	0.164229	0.795144	0.999678	-0.661545	0.297533	0.999833	0.344402	0.598507	0.981723	1.22159	0.0568244	0.999973
MMS19	-0.0316586	0.811935	0.999916	0.00268231	0.983913	0.999901	-0.0726335	0.585502	0.999678	-0.180377	0.178174	0.999833	-0.23945	0.0850456	0.821871	-0.256875	0.0569239	0.999973
CARD10	-0.341722	0.271766	0.999916	-0.17483	0.57261	0.999901	-0.537716	0.0858641	0.999678	-0.256564	0.408344	0.999833	-0.126595	0.692354	0.987662	-0.597463	0.0569797	0.999973
AC026877.1	0.247398	0.540741	0.999916	0.31134	0.441811	0.999901	0.618219	0.129234	0.999678	-0.488079	0.229454	0.999833	-0.585268	0.163901	0.884624	-0.77961	0.0569964	0.999973
RPSAP15	0.128975	0.698909	0.999916	0.42518	0.204832	0.999901	0.427066	0.202855	0.999678	-1.17193	0.000769361	0.4335	-1.07321	0.00262785	0.424329	-0.643046	0.057094	0.999973
SSTR1	-0.350379	0.652815	0.999916	-0.581242	0.456126	0.999901	-0.639192	0.412688	0.999678	0.713591	0.36075	0.999833	0.842297	0.296912	0.939203	1.50108	0.0571993	0.999973
EXOSC3	-0.00158942	0.991061	0.999916	0.0290796	0.83762	0.999901	-0.0661524	0.641293	0.999678	0.451144	0.00217751	0.60941	0.186845	0.205244	0.911318	0.273617	0.0572159	0.999973
NOD1	0.0764033	0.920171	0.999916	-0.00740213	0.992253	0.999901	-0.131292	0.863278	0.999678	-1.59233	0.0399133	0.999833	-1.19765	0.131772	0.854988	-1.4699	0.0572782	0.999973
ESR1	-0.188645	0.850248	0.999916	-0.210983	0.83277	0.999901	-0.307307	0.758469	0.999678	2.27466	0.0255494	0.960894	2.29147	0.0293157	0.692106	1.92154	0.0578756	0.999973
XYLB	0.117767	0.682992	0.999916	0.0138208	0.96175	0.999901	0.158085	0.583752	0.999678	-0.823981	0.00553173	0.755118	-0.556716	0.0650265	0.782693	-0.554255	0.0578943	0.999973
APOBEC3G	0.955366	0.316704	0.999916	-0.314203	0.741068	0.999901	-0.0774163	0.935085	0.999678	-2.04911	0.0341322	0.999833	-1.23091	0.212799	0.914811	-1.82521	0.0582646	0.999973
AC099336.2	-0.172554	0.647614	0.999916	-0.268411	0.477593	0.999901	0.321893	0.394793	0.999678	-0.481057	0.205023	0.999833	-0.519516	0.185522	0.89916	-0.723976	0.0583978	0.999973
AC022968.1	-0.0188339	0.934663	0.999916	-0.0290365	0.899428	0.999901	-0.0313769	0.891371	0.999678	-0.475499	0.041691	0.999833	-0.579506	0.0169554	0.605677	-0.440596	0.0585814	0.999973
ACSS3	0.0791077	0.881121	0.999916	0.150739	0.775722	0.999901	0.0443553	0.933171	0.999678	-0.64601	0.224604	0.999833	0.0142997	0.979125	0.998391	-1.01332	0.0588463	0.999973
AC093677.2	0.166501	0.715699	0.999916	0.994189	0.0325621	0.999901	0.822256	0.0754734	0.999678	-0.426333	0.352403	0.999833	0.080502	0.864615	0.991747	0.875088	0.058922	0.999973
AC091978.1	0.474316	0.226285	0.999916	-0.122698	0.753015	0.999901	0.164488	0.673236	0.999678	-0.712604	0.0710469	0.999833	-0.71023	0.081362	0.812804	-0.746499	0.058924	0.999973
DNAJC24	-0.134643	0.400752	0.999916	-0.0933238	0.559729	0.999901	0.00445546	0.977756	0.999678	-0.104159	0.515207	0.999833	-0.0158759	0.923399	0.993428	-0.306002	0.0589557	0.999973
AP000253.1	0.836625	0.27109	0.999916	1.14135	0.134802	0.999901	1.5049	0.0500597	0.999678	-2.86518	0.000320153	0.4335	0.0607691	0.93804	0.994789	-1.44824	0.0590631	0.999973
CTSD	-0.112652	0.469041	0.999916	-0.0752397	0.628296	0.999901	-0.0663054	0.669579	0.999678	-0.292585	0.0630059	0.999833	-0.229487	0.15581	0.872014	-0.297086	0.059163	0.999973
MYRF	0.104272	0.91126	0.999916	0.371388	0.691567	0.999901	0.32855	0.725578	0.999678	-1.29273	0.170154	0.999833	-0.653901	0.499496	0.967675	-1.78983	0.0591894	0.999973
AC002480.2	0.412053	0.604711	0.999916	0.8688	0.276793	0.999901	0.145547	0.854791	0.999678	0.916155	0.251694	0.999833	1.16383	0.159818	0.874943	1.52049	0.0593233	0.999973
FTH1P5	-0.104683	0.749994	0.999916	0.349368	0.28949	0.999901	0.45717	0.16702	0.999678	-0.565199	0.0887911	0.999833	-0.815801	0.0186254	0.608198	-0.627913	0.0593259	0.999973
RPS6KA6	-0.305555	0.258134	0.999916	-0.145768	0.588138	0.999901	-0.475012	0.0808349	0.999678	0.285053	0.291145	0.999833	0.499685	0.0756082	0.806218	0.513947	0.0593984	0.999973
KLLN	0.684875	0.0701591	0.999916	0.0700156	0.851283	0.999901	-0.626241	0.0970642	0.999678	-0.649225	0.0856502	0.999833	-0.806939	0.0396519	0.718265	-0.713715	0.0594143	0.999973
ZNF468	-0.0421881	0.796102	0.999916	0.0588133	0.718747	0.999901	-0.0789487	0.628928	0.999678	-0.0773553	0.635856	0.999833	0.265151	0.119364	0.850181	-0.31197	0.0594303	0.999973
SOSTDC1	0.195248	0.835439	0.999916	0.106749	0.909566	0.999901	-0.353967	0.706581	0.999678	-0.0294805	0.974974	0.999833	0.500062	0.606911	0.981746	1.79568	0.0594903	0.999973
SETD1B	0.546436	0.151918	0.999916	0.358885	0.34452	0.999901	0.0155623	0.967191	0.999678	-0.0500414	0.894784	0.999833	-0.208244	0.594638	0.981723	0.722793	0.0595435	0.999973
AC107375.1	0.461728	0.345748	0.999916	0.105726	0.828518	0.999901	0.331551	0.497663	0.999678	-0.853621	0.0838219	0.999833	-1.26386	0.0143446	0.598929	-0.932272	0.0595524	0.999973
ACTBP7	-0.230782	0.568948	0.999916	0.424644	0.29604	0.999901	-0.193674	0.632514	0.999678	-0.768844	0.0609038	0.999833	-1.00097	0.0191113	0.608292	-0.772962	0.0595702	0.999973
NLRC5	0.241659	0.692334	0.999916	0.152938	0.802192	0.999901	-0.726007	0.236796	0.999678	0.254043	0.677452	0.999833	-0.264332	0.67531	0.987213	-1.16533	0.0596905	0.999973
GIGYF2	0.0710549	0.559485	0.999916	0.0874026	0.473131	0.999901	0.164018	0.180388	0.999678	-0.228348	0.0638737	0.999833	-0.0544565	0.664901	0.985855	-0.231647	0.0602283	0.999973
AC007969.1	-0.00309466	0.99139	0.999916	0.0873717	0.76069	0.999901	0.0686856	0.810742	0.999678	-0.573128	0.0489903	0.999833	-0.848049	0.0054839	0.499129	-0.546258	0.0602558	0.999973
MTHFS	0.427833	0.284453	0.999916	0.328169	0.410779	0.999901	0.705651	0.0797339	0.999678	0.550595	0.169586	0.999833	0.409896	0.320638	0.947081	0.75777	0.0603417	0.999973
STX18-AS1	0.304913	0.170537	0.999916	-0.10329	0.640315	0.999901	0.220006	0.321052	0.999678	-0.124817	0.572467	0.999833	-0.0470468	0.836691	0.991747	-0.420581	0.060349	0.999973
PEBP1P2	-0.0882173	0.744524	0.999916	-0.121158	0.654597	0.999901	0.0134083	0.960482	0.999678	-0.685546	0.0133775	0.901248	-0.952939	0.00108221	0.321282	-0.515141	0.0604195	0.999973
NXNL2	0.899667	0.181109	0.999916	-0.402374	0.547539	0.999901	0.375206	0.574835	0.999678	0.251045	0.707234	0.999833	-0.163497	0.812802	0.991747	1.27078	0.0606164	0.999973
SREBF1	-0.177214	0.641953	0.999916	-0.26112	0.493691	0.999901	-0.418359	0.274169	0.999678	-0.376782	0.324282	0.999833	0.380305	0.335499	0.955627	0.72428	0.0606479	0.999973
AP000936.3	-0.138106	0.723703	0.999916	0.0399395	0.918535	0.999901	0.593639	0.13183	0.999678	-1.13935	0.00468583	0.726822	-1.08104	0.00907741	0.560684	-0.742321	0.0607651	0.999973
AC106791.1	0.603473	0.328778	0.999916	0.0598775	0.922525	0.999901	0.792522	0.200859	0.999678	0.215015	0.727032	0.999833	0.453125	0.47712	0.966679	1.1695	0.0609603	0.999973
USP2	0.0666369	0.880023	0.999916	0.122956	0.780666	0.999901	0.17169	0.697495	0.999678	-0.971225	0.0307381	0.999833	-0.904838	0.0506357	0.743522	-0.838331	0.0610255	0.999973
C5AR1	0.1886	0.8106	0.999916	-0.0548981	0.944375	0.999901	-0.297369	0.705625	0.999678	0.799818	0.311295	0.999833	1.08443	0.1852	0.89916	1.49414	0.0610358	0.999973
AC098934.2	0.495702	0.16644	0.999916	0.430075	0.229082	0.999901	0.203433	0.567733	0.999678	0.205641	0.563548	0.999833	0.600237	0.105824	0.839415	0.675214	0.0610488	0.999973
PKNOX2	0.0189036	0.956936	0.999916	-0.256399	0.464832	0.999901	-0.0801929	0.818844	0.999678	0.432883	0.218947	0.999833	0.339681	0.349296	0.956785	0.664715	0.0610603	0.999973
RASSF7	-0.0832944	0.736516	0.999916	-0.190695	0.441958	0.999901	-0.00301527	0.990278	0.999678	0.165388	0.504626	0.999833	0.223405	0.383613	0.958882	0.469809	0.0610847	0.999973
WDPCP	-0.0653518	0.753765	0.999916	-0.0838133	0.687542	0.999901	-0.0818108	0.694619	0.999678	-0.0791474	0.704073	0.999833	-0.195293	0.365615	0.958022	-0.395361	0.0611169	0.999973
CYP4F24P	0.59271	0.235634	0.999916	0.272801	0.58355	0.999901	0.438236	0.379378	0.999678	-0.235645	0.635728	0.999833	-0.67597	0.191027	0.902558	-0.942935	0.061292	0.999973
AC116533.1	-0.0149296	0.954904	0.999916	0.0347735	0.895216	0.999901	0.182809	0.48946	0.999678	-0.449444	0.0922314	0.999833	-0.772061	0.0059961	0.510211	-0.500722	0.0613489	0.999973
AC084757.3	0.85378	0.261424	0.999916	0.449922	0.552576	0.999901	0.552672	0.465984	0.999678	1.37317	0.0730479	0.999833	0.277557	0.722653	0.990749	1.43485	0.0613535	0.999973
ASNSD1	0.0318666	0.814819	0.999916	0.0747578	0.583053	0.999901	0.102373	0.45269	0.999678	0.278683	0.0437485	0.999833	0.388778	0.00716621	0.536926	0.257937	0.06141	0.999973
SPR	-0.52625	0.327461	0.999916	-0.383614	0.474568	0.999901	-0.860379	0.111563	0.999678	0.443614	0.408601	0.999833	0.853312	0.12637	0.851439	1.01463	0.0615624	0.999973
MXRA8	-0.202309	0.61381	0.999916	-0.259727	0.517339	0.999901	-0.549229	0.17335	0.999678	-0.967227	0.0181292	0.935263	-0.406304	0.327954	0.952367	-0.758895	0.0615863	0.999973
IPP	0.0141829	0.92832	0.999916	0.0428382	0.785897	0.999901	-0.00439764	0.977747	0.999678	0.142066	0.369025	0.999833	0.278574	0.0907875	0.826336	0.298516	0.0617736	0.999973
LUC7L2	0.0908293	0.3953	0.999916	0.118866	0.2669	0.999901	0.0152861	0.885936	0.999678	0.226329	0.0367721	0.999833	0.120385	0.276383	0.931027	0.201707	0.061834	0.999973
PPP1R32	-0.228645	0.542767	0.999916	-0.0740293	0.843582	0.999901	-0.23111	0.538438	0.999678	-0.549452	0.146298	0.999833	0.0652171	0.86639	0.991747	-0.709806	0.0619488	0.999973
COX17P1	-0.068789	0.843913	0.999916	-0.466374	0.184844	0.999901	0.000510214	0.998835	0.999678	-0.889587	0.0129245	0.901248	-1.31907	0.000493757	0.300494	-0.660773	0.0620274	0.999973
DCPS	0.166299	0.327917	0.999916	0.0886529	0.601028	0.999901	-0.0749905	0.658151	0.999678	-0.141965	0.403153	0.999833	-0.206437	0.240599	0.920326	-0.320332	0.0620387	0.999973
PARS2	0.234966	0.202913	0.999916	0.189097	0.304424	0.999901	-0.0337014	0.854202	0.999678	-0.250154	0.175584	0.999833	-0.384398	0.0457646	0.732036	-0.346823	0.0620603	0.999973
LGSN	-0.456655	0.565038	0.999916	-0.402781	0.611706	0.999901	-0.878479	0.270001	0.999678	1.4242	0.0759205	0.999833	-0.351654	0.667866	0.985855	1.49828	0.0622087	0.999973
RBM47	-0.557104	0.444968	0.999916	-0.129167	0.859134	0.999901	-0.458049	0.52969	0.999678	1.08147	0.140579	0.999833	0.0761611	0.919319	0.992977	1.37546	0.0622213	0.999973
YBX1P10	0.105853	0.75303	0.999916	-0.353846	0.294762	0.999901	0.148308	0.659443	0.999678	-0.618139	0.0695697	0.999833	-0.912442	0.0104779	0.568666	-0.635603	0.0622327	0.999973
ABCC10	0.0912074	0.662531	0.999916	0.0209894	0.919945	0.999901	0.00952845	0.963608	0.999678	-0.445202	0.0361136	0.999833	-0.260107	0.230618	0.91692	-0.394535	0.062345	0.999973
CA14	-0.0562304	0.892038	0.999916	0.0179309	0.965476	0.999901	0.105863	0.798352	0.999678	-0.414496	0.318906	0.999833	-0.189848	0.657614	0.985219	-0.782447	0.0624066	0.999973
CAPS2	-0.0265277	0.938486	0.999916	-0.248937	0.469838	0.999901	0.0157247	0.963513	0.999678	0.194863	0.571265	0.999833	0.805785	0.026053	0.666021	0.648926	0.0625293	0.999973
NAPEPLD	0.402267	0.0301631	0.999916	0.320292	0.0822895	0.999901	0.292581	0.111776	0.999678	0.213334	0.244084	0.999833	0.208023	0.27135	0.930867	0.34347	0.0628737	0.999973
HYKK	0.488933	0.369368	0.999916	0.639018	0.241746	0.999901	0.310615	0.567771	0.999678	0.429766	0.429768	0.999833	-0.741668	0.189117	0.902514	-1.0229	0.0630683	0.999973
CENPA	0.32249	0.606978	0.999916	0.293424	0.639704	0.999901	-0.215325	0.731109	0.999678	-0.285953	0.648237	0.999833	-0.645493	0.320363	0.947081	-1.17982	0.0630773	0.999973
LINC00327	0.142204	0.79037	0.999916	-0.0294388	0.956102	0.999901	-0.0430637	0.935822	0.999678	-0.799062	0.138486	0.999833	-0.0221828	0.967977	0.997485	-1.00733	0.0631095	0.999973
PRDM5	0.146338	0.660333	0.999916	-0.0976231	0.769304	0.999901	0.10468	0.753164	0.999678	-0.422738	0.206735	0.999833	-0.177497	0.606032	0.981746	-0.626534	0.0632025	0.999973
LDHBP2	-0.423026	0.38257	0.999916	-0.294731	0.542339	0.999901	-0.318166	0.510814	0.999678	-1.03477	0.035248	0.999833	-1.17289	0.0213362	0.637188	-0.909473	0.0632145	0.999973
EDDM13	0.219099	0.711982	0.999916	0.405663	0.494801	0.999901	0.585633	0.325289	0.999678	0.353859	0.55133	0.999833	0.455386	0.458392	0.966679	1.11529	0.0635556	0.999973
SUZ12	-0.113842	0.610727	0.999916	0.0452367	0.83957	0.999901	-0.173498	0.438485	0.999678	-0.000989784	0.996465	0.999833	-0.0393266	0.864738	0.991747	0.419843	0.0637116	0.999973
CIRBP	0.14727	0.260196	0.999916	0.103166	0.429111	0.999901	0.121032	0.354029	0.999678	-0.194505	0.138422	0.999833	-0.309619	0.0240053	0.659009	-0.244509	0.0637942	0.999973
AL008721.2	0.667798	0.541783	0.999916	0.398408	0.715607	0.999901	0.825682	0.450973	0.999678	-1.82961	0.0976759	0.999833	-2.20608	0.0541598	0.757924	-2.05305	0.0638139	0.999973
FABP5P1	-0.127218	0.746977	0.999916	-0.033781	0.931703	0.999901	0.46313	0.242496	0.999678	-0.697203	0.0804753	0.999833	-0.21723	0.594157	0.981723	-0.740373	0.0638233	0.999973
STK26	-0.199243	0.726935	0.999916	0.0158572	0.977817	0.999901	-0.122012	0.830618	0.999678	-0.0109629	0.984663	0.999833	0.302033	0.608604	0.981746	-1.07115	0.0638396	0.999973
ICE1	0.0681392	0.733741	0.999916	0.0607833	0.761539	0.999901	0.00100318	0.996002	0.999678	-0.0144171	0.942601	0.999833	0.070456	0.733545	0.991747	0.375981	0.0639081	0.999973
RASA4B	-0.0868689	0.926206	0.999916	-1.12865	0.231413	0.999901	-0.821433	0.382527	0.999678	-0.0796237	0.932345	0.999833	0.700118	0.470887	0.966679	1.76104	0.0639187	0.999973
GSG1	0.155206	0.763779	0.999916	-0.0899311	0.86173	0.999901	-0.234966	0.649287	0.999678	-1.06843	0.0417171	0.999833	-0.858126	0.111177	0.845916	-0.969206	0.0639696	0.999973
FAUP1	-0.495867	0.275857	0.999916	0.571481	0.209859	0.999901	0.312401	0.491196	0.999678	-0.546801	0.229978	0.999833	-0.906003	0.0563157	0.764842	-0.850238	0.0640067	0.999973
INPP5B	0.151341	0.480171	0.999916	0.18972	0.376642	0.999901	0.126955	0.553449	0.999678	0.387263	0.0738163	0.999833	-0.0947486	0.66841	0.985855	0.401511	0.0640493	0.999973
C5orf38	-0.0856812	0.85746	0.999916	-0.162049	0.734169	0.999901	0.141404	0.76696	0.999678	0.179933	0.706157	0.999833	0.546896	0.269388	0.929266	0.894361	0.0642838	0.999973
EFHD1	-0.535971	0.420014	0.999916	-0.593751	0.371954	0.999901	-1.02187	0.126657	0.999678	-1.53672	0.0231042	0.958772	-1.79113	0.0107964	0.569187	-1.24306	0.0642916	0.999973
RNF214	0.01792	0.888009	0.999916	0.317587	0.0147432	0.999901	0.0684757	0.590886	0.999678	0.152171	0.234293	0.999833	0.0649953	0.621365	0.982702	0.23855	0.0643182	0.999973
TMEM14DP	0.0826004	0.844623	0.999916	0.525214	0.21537	0.999901	0.307181	0.466949	0.999678	-0.839527	0.0496994	0.999833	-0.730798	0.096805	0.829553	-0.78941	0.0645263	0.999973
TAFA4	-0.416294	0.617126	0.999916	-0.510819	0.539782	0.999901	0.232589	0.779859	0.999678	-0.994709	0.234378	0.999833	-1.82102	0.037243	0.710975	-1.55781	0.0646238	0.999973
CEP83-DT	-0.392006	0.192476	0.999916	-0.472966	0.116926	0.999901	-0.895849	0.00372131	0.999678	-0.231452	0.439639	0.999833	-0.0921416	0.765433	0.991747	-0.559318	0.0647249	0.999973
COMMD3	0.0863132	0.537941	0.999916	0.0873513	0.533078	0.999901	0.300948	0.0345504	0.999678	0.398355	0.00572701	0.755118	0.205184	0.159039	0.874521	0.261862	0.0647899	0.999973
SURF6	-0.0420554	0.811103	0.999916	0.0564318	0.748477	0.999901	0.0595	0.735313	0.999678	-0.304987	0.08654	0.999833	-0.249977	0.172143	0.890224	-0.32911	0.0648772	0.999973
RPL14P1	-0.121524	0.697914	0.999916	0.137787	0.659932	0.999901	-0.00146476	0.996265	0.999678	-0.618138	0.0515951	0.999833	-0.966497	0.0038159	0.464755	-0.585287	0.0649201	0.999973
AC018865.3	0.854325	0.339933	0.999916	0.825695	0.356252	0.999901	1.09166	0.223717	0.999678	0.105847	0.905557	0.999833	-1.36744	0.141248	0.862536	-1.66841	0.0649499	0.999973
CGNL1	-0.0589201	0.934208	0.999916	-0.219603	0.758405	0.999901	-0.0156689	0.982485	0.999678	-0.570659	0.42511	0.999833	-1.01084	0.173532	0.892863	-1.33481	0.0649539	0.999973
CRAMP1	-0.194603	0.469099	0.999916	0.00954769	0.971609	0.999901	-0.00879615	0.973843	0.999678	0.00955756	0.971579	0.999833	-0.0331131	0.90491	0.992475	0.50155	0.0650369	0.999973
CDH20	0.355371	0.544878	0.999916	0.586491	0.318868	0.999901	0.303627	0.604811	0.999678	-0.451804	0.441848	0.999833	-0.175593	0.771921	0.991747	-1.09569	0.0650661	0.999973
AL034370.1	-0.0418234	0.906115	0.999916	0.266025	0.454103	0.999901	-0.0968097	0.784902	0.999678	-0.701196	0.0513637	0.999833	-0.828676	0.0264989	0.669007	-0.662837	0.0650846	0.999973
ZNF830	-0.0353861	0.810199	0.999916	0.0179322	0.903115	0.999901	0.0561259	0.703349	0.999678	-0.128933	0.382828	0.999833	-0.137078	0.369268	0.958607	-0.275249	0.0651851	0.999973
LDLRAP1	0.0128968	0.989579	0.999916	-0.0369913	0.970118	0.999901	-0.120942	0.902526	0.999678	-0.607755	0.538838	0.999833	-1.84807	0.0736228	0.79983	-1.84501	0.065203	0.999973
ACADM	0.082347	0.518528	0.999916	0.0556596	0.662282	0.999901	0.00845029	0.947093	0.999678	0.243497	0.0593154	0.999833	0.220752	0.0969302	0.829553	0.237923	0.0652113	0.999973
TMEM79	-0.13089	0.642783	0.999916	0.0738907	0.793335	0.999901	-0.129514	0.646275	0.999678	-0.455795	0.109501	0.999833	-0.430918	0.142431	0.864407	-0.526693	0.0652772	0.999973
APCDD1	0.10091	0.889781	0.999916	-0.206646	0.776624	0.999901	-0.484396	0.506602	0.999678	0.683064	0.349814	0.999833	1.01771	0.179158	0.896454	1.35957	0.0653697	0.999973
PCSK4	0.00385932	0.993322	0.999916	0.0336245	0.941867	0.999901	-0.339686	0.462235	0.999678	-0.67251	0.147973	0.999833	0.0606015	0.898782	0.992475	-0.860932	0.0653765	0.999973
PEX7	-0.207686	0.361956	0.999916	-0.0968552	0.669947	0.999901	-0.161996	0.476477	0.999678	-0.245818	0.281196	0.999833	-0.192016	0.414336	0.962742	-0.423613	0.0656206	0.999973
MAMLD1	-0.319529	0.362443	0.999916	-0.366312	0.296943	0.999901	-0.323639	0.356343	0.999678	0.129983	0.710286	0.999833	0.433164	0.233195	0.91692	0.652042	0.0657652	0.999973
AL109811.2	0.196895	0.601093	0.999916	-0.272577	0.469625	0.999901	-0.493715	0.19232	0.999678	-0.69161	0.0695245	0.999833	0.135405	0.727692	0.991747	-0.701012	0.0659093	0.999973
PATL1	0.00904148	0.969296	0.999916	0.189474	0.421044	0.999901	0.00533978	0.981864	0.999678	0.285754	0.226423	0.999833	0.202937	0.404323	0.96175	0.437679	0.0659267	0.999973
INO80	0.126567	0.519164	0.999916	-0.00470234	0.980862	0.999901	0.168725	0.390734	0.999678	0.20408	0.299843	0.999833	0.419123	0.0417265	0.719874	0.365093	0.0660378	0.999973
FTH1P7	-0.112016	0.718213	0.999916	0.117597	0.704831	0.999901	0.126746	0.683095	0.999678	-0.719913	0.0229692	0.958772	-0.952496	0.00402154	0.466416	-0.577833	0.0660572	0.999973
AL627171.1	1.0155	0.0375143	0.999916	1.41781	0.00423068	0.999901	0.905141	0.0628346	0.999678	-0.954982	0.0500096	0.999833	-0.521187	0.295383	0.937413	-0.893293	0.0662634	0.999973
KIAA1614	-0.0946287	0.896978	0.999916	0.643331	0.380107	0.999901	-0.193249	0.791496	0.999678	-1.89319	0.0115114	0.881015	-1.17892	0.121885	0.851276	-1.3593	0.0663871	0.999973
MT-ATP8	0.199529	0.402646	0.999916	0.100847	0.671675	0.999901	0.0680344	0.77484	0.999678	0.383313	0.110434	0.999833	0.233467	0.343609	0.956785	0.442008	0.0665352	0.999973
TAP1	0.278089	0.685292	0.999916	0.104551	0.878838	0.999901	-0.17325	0.8006	0.999678	-1.20964	0.0813048	0.999833	-0.545005	0.442827	0.966679	-1.27472	0.0665645	0.999973
AL356968.2	-0.294661	0.268008	0.999916	-0.280639	0.291235	0.999901	-0.136924	0.605411	0.999678	-0.598225	0.0266482	0.977525	-0.601308	0.0308821	0.699066	-0.492032	0.0666169	0.999973
ZCCHC14	0.257139	0.243177	0.999916	0.321603	0.145565	0.999901	0.404741	0.068302	0.999678	-0.396097	0.0742568	0.999833	-0.0736022	0.745254	0.991747	-0.406822	0.0669303	0.999973
ANXA2P1	0.164124	0.755607	0.999916	0.199059	0.705847	0.999901	0.0156572	0.976303	0.999678	-0.760051	0.152567	0.999833	-1.0148	0.0659159	0.784899	-0.978111	0.0670163	0.999973
IMMP2L	-0.101693	0.648784	0.999916	0.0368089	0.868966	0.999901	-0.113443	0.611467	0.999678	0.336265	0.135118	0.999833	0.102195	0.65776	0.985219	0.413964	0.0670345	0.999973
GDI2P2	0.0225711	0.940565	0.999916	0.104402	0.730303	0.999901	0.15789	0.602349	0.999678	-0.505226	0.0986669	0.999833	-0.627743	0.0480749	0.742302	-0.561672	0.0670477	0.999973
INAFM2	-0.277819	0.546866	0.999916	-0.332955	0.470549	0.999901	-0.495684	0.283882	0.999678	0.205774	0.655227	0.999833	0.542809	0.2563	0.926562	0.853909	0.0672022	0.999973
ABCC6P1	-0.257137	0.721398	0.999916	-0.231727	0.747921	0.999901	-0.279502	0.698333	0.999678	-0.196461	0.785235	0.999833	-1.67199	0.0275849	0.678786	-1.33481	0.0675425	0.999973
ZNF100	0.0120556	0.953141	0.999916	0.113875	0.5793	0.999901	0.00515183	0.979966	0.999678	0.475595	0.0230866	0.958772	0.636183	0.003687	0.459059	0.379862	0.0675996	0.999973
RN7SL5P	0.0116249	0.977288	0.999916	0.163539	0.688969	0.999901	0.372685	0.362943	0.999678	-0.775697	0.0609487	0.999833	-1.10939	0.0103808	0.568666	-0.755965	0.0676353	0.999973
LRRFIP1	-0.136522	0.377734	0.999916	-0.00184778	0.990446	0.999901	-0.178452	0.249918	0.999678	0.187122	0.227881	0.999833	0.113933	0.475714	0.966679	0.285655	0.0676537	0.999973
SAP30L-AS1	0.47476	0.500701	0.999916	-0.114015	0.871319	0.999901	0.559703	0.427589	0.999678	0.256559	0.715597	0.999833	0.814561	0.26494	0.927115	-1.30262	0.0677058	0.999973
SOX13	0.223858	0.622589	0.999916	-0.0301206	0.947151	0.999901	-0.117892	0.795345	0.999678	-0.631073	0.168023	0.999833	-0.209826	0.655181	0.984884	0.840833	0.0677682	0.999973
FBXO44	-0.0510121	0.732912	0.999916	0.0885509	0.553959	0.999901	0.043644	0.770287	0.999678	-0.224162	0.136911	0.999833	-0.363552	0.0210811	0.633699	-0.276427	0.0678242	0.999973
CCDC170	0.235075	0.710179	0.999916	-0.100379	0.873864	0.999901	0.0125623	0.984147	0.999678	-1.61639	0.0125898	0.888263	-0.819579	0.212365	0.914811	-1.16941	0.0678835	0.999973
AL049737.1	0.457295	0.284349	0.999916	0.477302	0.263993	0.999901	0.323933	0.44722	0.999678	-0.484827	0.25661	0.999833	0.351915	0.4243	0.964678	-0.786446	0.0679151	0.999973
GNB3	0.132278	0.843239	0.999916	-0.114123	0.864526	0.999901	0.662395	0.323804	0.999678	1.07848	0.11035	0.999833	-0.0900512	0.896323	0.992475	1.23683	0.0679319	0.999973
ETV6	-0.0539442	0.863261	0.999916	-0.165885	0.596739	0.999901	-0.454893	0.149641	0.999678	0.0717382	0.818858	0.999833	0.273564	0.39918	0.96175	0.578313	0.0683306	0.999973
RCE1	-0.0894577	0.526954	0.999916	0.0353297	0.802443	0.999901	-0.0847919	0.548666	0.999678	-0.238343	0.094918	0.999833	0.00825015	0.954897	0.995261	-0.260537	0.0684938	0.999973
AC105942.1	-0.0419801	0.796658	0.999916	-0.242771	0.139431	0.999901	-0.187119	0.253031	0.999678	-0.0657792	0.686505	0.999833	-0.157756	0.350173	0.957206	-0.300575	0.068498	0.999973
DIO3	0.178134	0.782623	0.999916	-0.0756285	0.906729	0.999901	0.170128	0.792158	0.999678	0.792429	0.222226	0.999833	0.579762	0.386037	0.958882	-1.19088	0.0685507	0.999973
C4A	0.410694	0.590701	0.999916	0.126588	0.868204	0.999901	-0.22127	0.771821	0.999678	-2.59676	0.00109571	0.459743	-1.34501	0.0914433	0.826336	-1.40732	0.0685559	0.999973
USP1	0.236942	0.187077	0.999916	0.120371	0.500581	0.999901	-0.0940595	0.5984	0.999678	0.476462	0.00929085	0.798588	0.193284	0.296377	0.938224	0.329111	0.068572	0.999973
COX20	0.236242	0.334747	0.999916	0.0788871	0.746591	0.999901	0.233672	0.339994	0.999678	0.373531	0.129256	0.999833	0.512428	0.0454031	0.732036	0.450023	0.0686845	0.999973
AL590139.1	0.398872	0.200431	0.999916	0.289493	0.351326	0.999901	0.449105	0.150111	0.999678	-0.734651	0.020142	0.958772	-0.865131	0.0084753	0.555746	-0.570734	0.0687506	0.999973
AC022613.1	-0.33405	0.561453	0.999916	0.0199897	0.972244	0.999901	0.0676392	0.906285	0.999678	-0.348579	0.5446	0.999833	0.21517	0.717127	0.989289	-1.05857	0.0689185	0.999973
KLHL26	-0.0445156	0.791722	0.999916	0.0855352	0.612124	0.999901	-0.110017	0.514565	0.999678	0.0960567	0.569175	0.999833	-0.150381	0.389147	0.959722	0.310454	0.0689711	0.999973
EFCAB1	0.147913	0.815131	0.999916	0.182439	0.773074	0.999901	-0.0191046	0.975903	0.999678	0.350735	0.579662	0.999833	-0.655763	0.317505	0.946676	-1.1651	0.0689803	0.999973
PLCD1	-0.101493	0.728386	0.999916	-0.128528	0.66019	0.999901	-0.146311	0.616815	0.999678	-0.514862	0.0815428	0.999833	-0.538669	0.0778581	0.809948	-0.538047	0.0690177	0.999973
AC068631.3	0.188539	0.521628	0.999916	-0.0586418	0.841787	0.999901	-0.379763	0.198934	0.999678	-0.374034	0.205708	0.999833	-0.380415	0.212797	0.914811	-0.540932	0.069065	0.999973
STAP2	-0.254516	0.50149	0.999916	0.0490769	0.896704	0.999901	0.00459513	0.990301	0.999678	-1.20099	0.00219536	0.60941	-0.694284	0.0790059	0.811162	-0.695899	0.0691421	0.999973
AC023886.2	-0.0153818	0.965235	0.999916	0.0844742	0.810862	0.999901	-0.0373447	0.915729	0.999678	-0.473196	0.182976	0.999833	-0.646553	0.0797514	0.811162	-0.648976	0.0694472	0.999973
RPL7AP30	0.153402	0.724078	0.999916	0.304018	0.484785	0.999901	0.340624	0.433996	0.999678	-0.979574	0.0269222	0.978227	-1.53027	0.0010768	0.321282	-0.798666	0.0694688	0.999973
SLCO1C1	0.20357	0.681831	0.999916	0.0150837	0.975751	0.999901	0.134879	0.78583	0.999678	0.818346	0.102653	0.999833	1.02295	0.0493705	0.742302	0.912412	0.0694856	0.999973
SIRT4	0.101365	0.735246	0.999916	-0.155602	0.603912	0.999901	0.2187	0.46636	0.999678	-0.19012	0.52638	0.999833	-0.253744	0.413626	0.962742	-0.550668	0.0696074	0.999973
PROX1-AS1	0.505306	0.368938	0.999916	0.663154	0.2394	0.999901	0.182611	0.744743	0.999678	-0.367262	0.513126	0.999833	-1.23128	0.0366461	0.708731	-1.03038	0.069613	0.999973
MT-TL1	-0.514094	0.278196	0.999916	0.237187	0.615599	0.999901	0.274691	0.561041	0.999678	0.376911	0.425629	0.999833	0.572773	0.242623	0.92042	0.866909	0.069744	0.999973
FAT3	0.204161	0.376711	0.999916	0.281948	0.223433	0.999901	0.656836	0.00563533	0.999678	0.153431	0.505925	0.999833	0.193654	0.416842	0.962742	0.422857	0.069819	0.999973
EPG5	-0.0330889	0.883111	0.999916	0.106359	0.636768	0.999901	0.088747	0.693484	0.999678	-0.387169	0.0889021	0.999833	-0.342789	0.143713	0.866011	-0.413027	0.0699744	0.999973
BANP	-0.205551	0.281075	0.999916	0.0340963	0.857477	0.999901	-0.119631	0.529211	0.999678	-0.215648	0.25833	0.999833	-0.351038	0.0770479	0.808523	-0.348179	0.0701657	0.999973
CEP152	-0.0302943	0.952696	0.999916	-0.168131	0.742085	0.999901	-0.171683	0.73684	0.999678	-1.22762	0.0186464	0.950045	0.153695	0.770902	0.991747	-0.936614	0.0701711	0.999973
IL4R	-0.38731	0.59704	0.999916	-0.515682	0.481871	0.999901	-0.769479	0.295108	0.999678	1.42052	0.0556765	0.999833	2.3101	0.00315214	0.448531	1.34181	0.0702553	0.999973
AKNA	0.161759	0.740189	0.999916	0.240048	0.62283	0.999901	0.170705	0.726395	0.999678	-0.421385	0.388844	0.999833	-1.68777	0.00129679	0.340466	-0.893978	0.0702671	0.999973
NPM1P27	-0.0111954	0.96282	0.999916	0.236121	0.327326	0.999901	0.224408	0.35172	0.999678	-0.343697	0.155629	0.999833	-0.438809	0.0805494	0.811656	-0.44019	0.0703485	0.999973
DCAKD	0.0360799	0.846606	0.999916	0.0724441	0.697828	0.999901	0.0976321	0.600977	0.999678	-0.222942	0.234447	0.999833	-0.233972	0.227244	0.91692	-0.341688	0.0704347	0.999973
HMGB1P5	0.0281221	0.875134	0.999916	0.0683339	0.702715	0.999901	0.05151	0.773528	0.999678	-0.328104	0.070247	0.999833	-0.610679	0.00149937	0.343234	-0.327849	0.07046	0.999973
DHX35	0.0727733	0.667844	0.999916	0.0256646	0.879639	0.999901	-0.0739295	0.662897	0.999678	-0.349287	0.0425331	0.999833	-0.18656	0.288777	0.936188	-0.31026	0.0706661	0.999973
PXN-AS1	0.374204	0.241326	0.999916	0.21425	0.500791	0.999901	0.103901	0.743721	0.999678	0.325841	0.306991	0.999833	0.0219492	0.946684	0.995108	0.581558	0.0706796	0.999973
MT-TN	0.0172052	0.976331	0.999916	-0.174166	0.763998	0.999901	0.123029	0.832013	0.999678	1.14031	0.0526422	0.999833	1.46299	0.0169417	0.605677	1.06147	0.0707131	0.999973
TMEM101	0.0278611	0.856388	0.999916	0.0261318	0.865212	0.999901	-0.0572664	0.710022	0.999678	-0.100242	0.515599	0.999833	-0.25417	0.113507	0.846662	-0.281647	0.0708252	0.999973
IQCE	0.202333	0.314655	0.999916	0.116623	0.561187	0.999901	0.165952	0.408939	0.999678	-0.305002	0.131482	0.999833	-0.403703	0.0546646	0.761609	-0.366535	0.0709792	0.999973
RPL24P4	-0.172856	0.557793	0.999916	-0.0393092	0.89383	0.999901	0.279391	0.344484	0.999678	-0.66099	0.0276492	0.983978	-0.795513	0.0108134	0.569187	-0.538245	0.0711516	0.999973
AC022137.4	0.309947	0.6206	0.999916	-0.436586	0.486054	0.999901	-0.203513	0.745033	0.999678	-0.8895	0.158255	0.999833	-0.0996935	0.877429	0.991747	1.14271	0.0712782	0.999973
CHCHD2P6	-0.11845	0.797138	0.999916	-0.15961	0.729115	0.999901	0.14605	0.751314	0.999678	-0.523195	0.258443	0.999833	-1.16006	0.0171394	0.605677	-0.841188	0.0713881	0.999973
CPT1A	-0.189379	0.780967	0.999916	-0.143216	0.833428	0.999901	-0.280664	0.680383	0.999678	-0.405245	0.552264	0.999833	-2.73121	0.000232849	0.300494	-1.24295	0.071454	0.999973
ALPK1	0.152721	0.816979	0.999916	0.401043	0.543855	0.999901	0.179692	0.785406	0.999678	-0.385043	0.56	0.999833	-0.0323046	0.962203	0.995903	-1.20432	0.0714759	0.999973
ACTN4	0.0318222	0.888341	0.999916	0.0429636	0.849662	0.999901	-0.0900819	0.691189	0.999678	-0.609235	0.00886595	0.788611	-0.555828	0.020114	0.62019	-0.413633	0.0715116	0.999973
UACA	0.146128	0.731169	0.999916	0.201328	0.6361	0.999901	0.199375	0.639372	0.999678	-0.344981	0.418276	0.999833	-1.12569	0.0123884	0.591573	-0.775855	0.0715356	0.999973
TMEM251	-0.512876	0.0237144	0.999916	-0.233122	0.29633	0.999901	-0.267266	0.231806	0.999678	0.433321	0.0546575	0.999833	0.603043	0.010486	0.568666	0.405599	0.0715781	0.999973
BMPR1AP1	-0.440973	0.252565	0.999916	-0.351855	0.360403	0.999901	-0.204128	0.594903	0.999678	-0.20973	0.584858	0.999833	-0.3103	0.434602	0.966041	-0.699653	0.0716	0.999973
RN7SL3	0.303238	0.479866	0.999916	0.116494	0.785722	0.999901	0.493792	0.251444	0.999678	-0.459094	0.285974	0.999833	-0.587864	0.187081	0.89916	-0.781062	0.0717866	0.999973
AC079414.3	-0.669567	0.224221	0.999916	-0.0921017	0.866486	0.999901	-0.37716	0.491901	0.999678	1.20092	0.0313073	0.999833	0.637085	0.262621	0.926836	0.998515	0.0718516	0.999973
BNIP1	-0.141627	0.336682	0.999916	-0.00713105	0.96128	0.999901	0.0946635	0.519944	0.999678	-0.0894519	0.543112	0.999833	0.0396127	0.794135	0.991747	-0.267729	0.0718842	0.999973
PPP3CB-AS1	0.398704	0.403802	0.999916	0.177693	0.709238	0.999901	0.245749	0.606247	0.999678	0.0142069	0.976204	0.999833	-0.201246	0.68277	0.987662	-0.868104	0.0718902	0.999973
TPRN	0.14891	0.742982	0.999916	-0.23217	0.609389	0.999901	-0.453847	0.319265	0.999678	0.290529	0.522814	0.999833	0.232053	0.621091	0.982702	0.827026	0.0720027	0.999973
LINC02334	-0.222619	0.81405	0.999916	0.0680517	0.942671	0.999901	-0.119899	0.899181	0.999678	1.39631	0.143376	0.999833	1.80843	0.0678809	0.786126	1.7233	0.072125	0.999973
EGF	-0.16853	0.78406	0.999916	-0.0683135	0.911532	0.999901	-0.150674	0.806446	0.999678	0.323776	0.59885	0.999833	-0.430904	0.498323	0.96751	-1.11945	0.0721767	0.999973
DIO3OS	0.143424	0.859945	0.999916	0.385021	0.635992	0.999901	0.508346	0.532292	0.999678	0.677287	0.405924	0.999833	0.222358	0.791227	0.991747	1.47939	0.0722636	0.999973
ORAI2	-0.193644	0.0951004	0.999916	-0.110931	0.335497	0.999901	-0.207021	0.0748004	0.999678	-0.233131	0.045508	0.999833	-0.214616	0.0738513	0.80094	-0.20886	0.0723167	0.999973
AL360178.1	0.483581	0.577265	0.999916	-0.198958	0.81844	0.999901	1.12454	0.197268	0.999678	0.376133	0.664474	0.999833	-0.0786299	0.93002	0.9944	-1.57692	0.0723286	0.999973
ASNS	0.295207	0.63585	0.999916	0.0170806	0.978124	0.999901	1.0164	0.106257	0.999678	-0.629544	0.314081	0.999833	-1.09719	0.0917878	0.826336	-1.13348	0.0723435	0.999973
AC104966.1	0.804506	0.247771	0.999916	0.797125	0.252092	0.999901	0.956006	0.170521	0.999678	-0.552638	0.42597	0.999833	-0.44925	0.530689	0.972212	-1.25993	0.0723761	0.999973
RPS26P6	-0.0852152	0.79853	0.999916	-0.179684	0.590749	0.999901	0.0579289	0.862226	0.999678	-1.01004	0.00343019	0.691469	-0.637991	0.067822	0.786126	-0.607242	0.0723916	0.999973
LUC7L3	0.184051	0.33026	0.999916	0.182012	0.335607	0.999901	0.323595	0.0893426	0.999678	0.162612	0.389307	0.999833	-0.0468384	0.809841	0.991747	0.342565	0.072482	0.999973
COL19A1	0.370523	0.527501	0.999916	0.270756	0.644058	0.999901	0.342326	0.559305	0.999678	-0.205406	0.72586	0.999833	0.416456	0.492001	0.967231	1.06452	0.0725906	0.999973
TMEM222	-0.0258264	0.839473	0.999916	0.0499474	0.695362	0.999901	-0.0256139	0.840776	0.999678	-0.177381	0.167212	0.999833	-0.317838	0.0182145	0.607139	-0.231667	0.0727005	0.999973
UQCRHL	0.0742524	0.788246	0.999916	0.0384399	0.889391	0.999901	0.0796002	0.773407	0.999678	-0.409104	0.142132	0.999833	-0.529717	0.0671022	0.786126	-0.502017	0.0728423	0.999973
RPL15P2	-0.204998	0.53397	0.999916	-0.235566	0.475008	0.999901	0.399082	0.2279	0.999678	-0.753935	0.0246921	0.958772	-0.830236	0.0169481	0.605677	-0.597606	0.0729337	0.999973
RPL41P2	-0.114123	0.768521	0.999916	-0.0633354	0.870225	0.999901	0.139348	0.719369	0.999678	-0.509509	0.191647	0.999833	-0.875075	0.031872	0.708392	-0.703595	0.0730483	0.999973
TRMT1	-0.218088	0.166549	0.999916	-0.0918154	0.557895	0.999901	0.00569341	0.970976	0.999678	-0.226471	0.15108	0.999833	-0.364387	0.0270217	0.675255	-0.284004	0.0730708	0.999973
EIF3LP3	0.166844	0.730051	0.999916	-0.311756	0.519563	0.999901	0.318335	0.510817	0.999678	-1.08066	0.0282077	0.992034	-1.12622	0.0269181	0.675255	-0.877097	0.073092	0.999973
MNS1	0.601267	0.396471	0.999916	0.093089	0.895271	0.999901	0.310209	0.661119	0.999678	0.604501	0.393951	0.999833	0.113978	0.87604	0.991747	1.2825	0.0732613	0.999973
DMPK	0.532645	0.0809126	0.999916	0.470902	0.121856	0.999901	0.414862	0.172023	0.999678	-0.0129578	0.965728	0.999833	-0.659163	0.0375147	0.714171	0.546897	0.0732953	0.999973
NCAPH2	-0.00567391	0.966775	0.999916	-0.0307437	0.821471	0.999901	-0.127569	0.350634	0.999678	-0.193436	0.15879	0.999833	-0.197209	0.164305	0.884808	-0.246986	0.0733412	0.999973
AC024940.3	0.309653	0.47007	0.999916	0.316608	0.460197	0.999901	0.306502	0.474581	0.999678	-0.971557	0.0259125	0.964343	-1.53766	0.00086732	0.303214	-0.775597	0.0733716	0.999973
ERP29	-0.108537	0.412943	0.999916	-0.0139251	0.91613	0.999901	-0.0242734	0.854363	0.999678	-0.176369	0.185236	0.999833	-0.350555	0.0122832	0.591573	-0.239712	0.0733825	0.999973
AL133260.1	0.103969	0.837989	0.999916	-0.285415	0.574996	0.999901	0.326158	0.52184	0.999678	-0.704254	0.169106	0.999833	-0.567424	0.282208	0.934908	-0.921265	0.0735154	0.999973
MKLN1-AS	0.0862814	0.677798	0.999916	0.166147	0.42452	0.999901	0.163857	0.430901	0.999678	0.123752	0.551522	0.999833	-0.175037	0.415523	0.962742	-0.376024	0.0735447	0.999973
MRPL1	0.0692979	0.611293	0.999916	0.0800479	0.55729	0.999901	0.189222	0.167921	0.999678	0.208179	0.12984	0.999833	0.164157	0.245923	0.922116	0.246801	0.0735508	0.999973
IFT81	0.0460592	0.697939	0.999916	0.131456	0.269983	0.999901	0.0773819	0.514825	0.999678	0.274224	0.0234427	0.958772	0.311595	0.0130584	0.591573	0.214693	0.0738203	0.999973
TCEANC2	0.161085	0.39015	0.999916	0.0190303	0.918908	0.999901	0.125896	0.501348	0.999678	-0.434722	0.0226605	0.958772	-0.441965	0.024832	0.662745	-0.338226	0.0739106	0.999973
LINC00863	0.386963	0.107576	0.999916	0.0648207	0.785463	0.999901	0.187193	0.432778	0.999678	0.0877288	0.712635	0.999833	0.307996	0.213254	0.914811	0.43075	0.0739291	0.999973
LY96	-1.00298	0.228469	0.999916	-0.827011	0.319834	0.999901	-0.487643	0.556501	0.999678	1.2768	0.126555	0.999833	1.11217	0.196567	0.904536	1.49828	0.0739612	0.999973
HIST1H1D	-0.019921	0.980362	0.999916	0.323126	0.689873	0.999901	0.19281	0.81173	0.999678	-0.281786	0.727818	0.999833	0.324273	0.698322	0.988974	1.46327	0.074132	0.999973
AL121987.2	0.39273	0.490479	0.999916	0.477819	0.401916	0.999901	0.32405	0.569156	0.999678	0.682493	0.232521	0.999833	0.373335	0.525688	0.971634	1.02731	0.074296	0.999973
LINC00674	0.0297086	0.892525	0.999916	0.0706839	0.747943	0.999901	-0.0149539	0.945776	0.999678	0.0890166	0.685768	0.999833	0.175456	0.44096	0.966679	0.39717	0.0743995	0.999973
AC092645.1	0.13104	0.877058	0.999916	0.401027	0.636167	0.999901	0.411593	0.627317	0.999678	0.746556	0.379515	0.999833	1.05167	0.232044	0.91692	1.52951	0.074488	0.999973
DHX38	0.0788364	0.631286	0.999916	0.0726934	0.658068	0.999901	0.00774596	0.962357	0.999678	-0.276805	0.0952376	0.999833	-0.184624	0.278456	0.931027	-0.296377	0.07449	0.999973
LRCH4	0.288514	0.20049	0.999916	-0.0666223	0.766166	0.999901	0.307092	0.173373	0.999678	0.0164531	0.941433	0.999833	0.13406	0.562833	0.979275	0.404337	0.0745353	0.999973
TMPO-AS1	0.481289	0.284337	0.999916	0.445273	0.321617	0.999901	0.42508	0.343888	0.999678	0.461107	0.304842	0.999833	0.0398026	0.931407	0.9944	0.807375	0.0747724	0.999973
SMG6	0.226814	0.188257	0.999916	0.120025	0.484156	0.999901	0.0841311	0.623511	0.999678	-0.162528	0.344201	0.999833	-0.112294	0.526245	0.971634	-0.308596	0.0750502	0.999973
CCDC148	0.475605	0.119566	0.999916	0.277903	0.3601	0.999901	0.45028	0.140177	0.999678	0.476557	0.118841	0.999833	0.515992	0.102481	0.836854	0.545462	0.0750688	0.999973
RFX3-AS1	0.157529	0.777155	0.999916	0.237852	0.669254	0.999901	0.855354	0.127645	0.999678	0.0658449	0.905805	0.999833	0.491248	0.394158	0.960423	-1.00198	0.075283	0.999973
SCN1A	-0.000119468	0.999792	0.999916	0.0358654	0.937651	0.999901	0.206625	0.652492	0.999678	-0.449263	0.328944	0.999833	-0.304252	0.521372	0.97125	-0.825482	0.0753414	0.999973
AC025809.2	0.168017	0.814075	0.999916	0.152069	0.831437	0.999901	-0.0536244	0.940157	0.999678	-0.972444	0.176444	0.999833	-0.57802	0.43459	0.966041	-1.28511	0.0755412	0.999973
RELB	-0.479063	0.410591	0.999916	-0.40157	0.490014	0.999901	-0.672338	0.249355	0.999678	-0.526204	0.366347	0.999833	0.501914	0.404094	0.96175	1.04432	0.0756473	0.999973
GUSB	0.061314	0.712224	0.999916	0.102471	0.537965	0.999901	0.095883	0.564343	0.999678	-0.0470001	0.777316	0.999833	-0.0195061	0.909529	0.992673	-0.298672	0.0757569	0.999973
VPS33B	0.0602512	0.711849	0.999916	0.0507323	0.75575	0.999901	0.0668285	0.682065	0.999678	0.231828	0.158236	0.999833	0.220934	0.192579	0.903971	0.293022	0.0758279	0.999973
QRICH1	0.00178696	0.9856	0.999916	0.0462625	0.640584	0.999901	-0.0251682	0.79938	0.999678	0.00642829	0.948231	0.999833	-0.0495772	0.628229	0.982702	0.177936	0.0758422	0.999973
MOB2	0.118713	0.496931	0.999916	0.0181154	0.917292	0.999901	-0.0495044	0.776637	0.999678	-0.490854	0.00627895	0.755118	-0.412027	0.0249803	0.664036	-0.3135	0.0758512	0.999973
ZNF354A	-0.367774	0.0419213	0.999916	-0.0461489	0.795365	0.999901	-0.0148782	0.933348	0.999678	0.296009	0.0996594	0.999833	0.1665	0.366523	0.958022	0.319545	0.0759992	0.999973
LINC01579	-0.14023	0.840927	0.999916	-0.366804	0.599916	0.999901	0.406712	0.560939	0.999678	1.29865	0.0665327	0.999833	1.53427	0.0366328	0.708731	1.25437	0.0760994	0.999973
COL27A1	0.241809	0.756789	0.999916	0.0682185	0.930352	0.999901	0.214822	0.783195	0.999678	-2.57276	0.00153032	0.51467	-0.891242	0.271328	0.930867	-1.4003	0.0763415	0.999973
KCNJ10	-0.15713	0.819819	0.999916	0.085425	0.901434	0.999901	-0.0382458	0.955778	0.999678	1.31292	0.0604296	0.999833	1.15295	0.109185	0.845916	1.23709	0.0764159	0.999973
POC5	0.0154774	0.919321	0.999916	0.0574414	0.707124	0.999901	0.169676	0.269073	0.999678	0.230676	0.134503	0.999833	0.0692011	0.661382	0.985379	0.274053	0.076433	0.999973
AC037198.1	-0.0818295	0.907274	0.999916	-0.17522	0.803079	0.999901	0.417958	0.552415	0.999678	-0.383038	0.586012	0.999833	-0.196682	0.78647	0.991747	-1.25993	0.0764419	0.999973
SLC6A16	0.571386	0.314224	0.999916	0.477616	0.399659	0.999901	0.736171	0.195902	0.999678	0.135582	0.810569	0.999833	0.0698486	0.904852	0.992475	1.01391	0.0765441	0.999973
CCDC144NL	0.206251	0.808948	0.999916	-0.267634	0.753754	0.999901	-0.119906	0.888199	0.999678	-0.816651	0.339993	0.999833	-1.25269	0.158343	0.87373	-1.52895	0.0765597	0.999973
VDAC1P1	-0.389579	0.118551	0.999916	0.0375103	0.879419	0.999901	0.0451418	0.855141	0.999678	-0.392454	0.115907	0.999833	-0.578609	0.026291	0.66742	-0.443209	0.076575	0.999973
ATG101	-0.129166	0.411202	0.999916	-0.0269265	0.863641	0.999901	0.0295623	0.850447	0.999678	-0.193842	0.218973	0.999833	-0.141027	0.38532	0.958882	-0.28102	0.0765857	0.999973
DNAJC22	-0.136777	0.881231	0.999916	0.680055	0.458483	0.999901	0.376254	0.68124	0.999678	0.158295	0.862722	0.999833	0.0526006	0.955648	0.995261	-1.64073	0.0766131	0.999973
ARF4P1	-0.344973	0.313638	0.999916	-0.35224	0.303634	0.999901	-0.0663047	0.84586	0.999678	0.217159	0.524908	0.999833	0.245046	0.487573	0.966679	0.611239	0.0766182	0.999973
AC105074.1	1.13735	0.160142	0.999916	0.672939	0.403609	0.999901	1.26852	0.117886	0.999678	0.630334	0.433877	0.999833	1.28339	0.125578	0.851439	1.43987	0.0766996	0.999973
ABCB11	0.550714	0.552607	0.999916	0.532878	0.565511	0.999901	0.118806	0.897927	0.999678	-0.572319	0.537177	0.999833	-1.51759	0.116207	0.849462	-1.65939	0.0767071	0.999973
AC007066.2	0.0412693	0.929333	0.999916	0.55645	0.234345	0.999901	0.0384592	0.934134	0.999678	-0.38034	0.41494	0.999833	-0.274913	0.567956	0.979275	-0.833398	0.0768515	0.999973
WDFY3	0.219443	0.285422	0.999916	0.0177352	0.930899	0.999901	0.0114836	0.955224	0.999678	0.135128	0.509517	0.999833	0.407905	0.0570029	0.764842	0.366208	0.0769122	0.999973
ZNF816	0.201372	0.414801	0.999916	0.183011	0.45842	0.999901	0.286028	0.247974	0.999678	0.101025	0.681879	0.999833	-0.0418286	0.869455	0.991747	-0.440947	0.0769605	0.999973
HIGD1AP1	0.0232456	0.947377	0.999916	0.213803	0.544389	0.999901	0.0483116	0.890903	0.999678	-0.67857	0.0574617	0.999833	-0.948455	0.0110402	0.571693	-0.630247	0.0770884	0.999973
KCNK1	0.172283	0.825757	0.999916	0.55642	0.47786	0.999901	-0.0688205	0.929913	0.999678	0.466998	0.551155	0.999833	0.0989999	0.90254	0.992475	1.39873	0.0773815	0.999973
RPS15AP1	-0.596667	0.109813	0.999916	-0.239321	0.51781	0.999901	-0.150952	0.683037	0.999678	-0.239791	0.516991	0.999833	-0.414057	0.280225	0.933146	-0.660374	0.0774147	0.999973
WASF3	-0.14349	0.606976	0.999916	0.00141283	0.995955	0.999901	-0.095394	0.732223	0.999678	0.0337875	0.9035	0.999833	0.124845	0.664799	0.985855	0.497807	0.0775843	0.999973
C2CD6	-0.354499	0.592464	0.999916	-1.09351	0.101873	0.999901	1.67562	0.0133959	0.999678	0.507443	0.444084	0.999833	1.09351	0.113128	0.846662	1.18171	0.0776047	0.999973
AC027237.1	-0.0295189	0.936331	0.999916	-0.0827026	0.82294	0.999901	-0.378767	0.307313	0.999678	0.254723	0.491412	0.999833	0.587164	0.12749	0.851439	0.659894	0.0776829	0.999973
NME7	0.0703584	0.689278	0.999916	0.0235671	0.893401	0.999901	0.107192	0.542752	0.999678	0.279315	0.115701	0.999833	0.296885	0.105794	0.839415	0.314036	0.077695	0.999973
POTEI	-0.316017	0.415052	0.999916	-0.000530933	0.998905	0.999901	-0.107905	0.780299	0.999678	-0.957121	0.0155654	0.912533	-0.868939	0.0326569	0.708731	-0.689973	0.0779595	0.999973
USP53	-0.0337505	0.858207	0.999916	-0.0832276	0.65973	0.999901	-0.0258729	0.891059	0.999678	-0.153945	0.416265	0.999833	-0.117522	0.547617	0.976651	-0.33669	0.0782229	0.999973
NFKBIL1	-0.132559	0.376824	0.999916	0.162061	0.280656	0.999901	0.144691	0.335001	0.999678	-0.0810332	0.588322	0.999833	-0.32103	0.040932	0.718265	-0.266413	0.0783742	0.999973
EEF1A1P10	-0.2717	0.57458	0.999916	0.033386	0.944944	0.999901	0.223326	0.644396	0.999678	-1.0093	0.0400067	0.999833	-1.28353	0.0121671	0.591573	-0.860058	0.0787911	0.999973
ERN1	0.181045	0.437762	0.999916	0.252143	0.280874	0.999901	0.187704	0.421179	0.999678	-0.246629	0.291434	0.999833	-0.485343	0.046894	0.738959	-0.413585	0.0791523	0.999973
AP000553.1	0.0299655	0.949871	0.999916	0.124257	0.794379	0.999901	0.142207	0.765508	0.999678	0.647553	0.177328	0.999833	0.577679	0.243268	0.921533	0.846847	0.079166	0.999973
ABCA17P	0.218203	0.690041	0.999916	0.394038	0.472041	0.999901	0.362166	0.508485	0.999678	0.373023	0.495904	0.999833	0.542673	0.338508	0.955627	0.970847	0.0793758	0.999973
ADA	-0.173819	0.772584	0.999916	0.0221773	0.970577	0.999901	-0.0081552	0.989178	0.999678	0.978683	0.107103	0.999833	0.796696	0.20253	0.910048	1.06712	0.079486	0.999973
BCKDHA	-0.0304562	0.939875	0.999916	-0.0584075	0.884994	0.999901	0.606948	0.136157	0.999678	0.137619	0.733347	0.999833	-0.187556	0.653272	0.984884	-0.716485	0.0795413	0.999973
TSC22D4	0.26401	0.454793	0.999916	0.111549	0.751719	0.999901	0.0312466	0.929358	0.999678	0.318975	0.366968	0.999833	0.587912	0.109935	0.845916	0.625197	0.079641	0.999973
AL356653.1	-0.14745	0.717325	0.999916	-0.502635	0.219617	0.999901	-0.186438	0.647223	0.999678	-0.716949	0.0817567	0.999833	-0.806322	0.0586769	0.77141	-0.722001	0.0796772	0.999973
BAD	-0.0889537	0.549326	0.999916	-0.0376018	0.799962	0.999901	0.047959	0.746587	0.999678	0.184559	0.216207	0.999833	0.00479506	0.975044	0.998091	0.263105	0.0797008	0.999973
RPS6KA4	-0.0624672	0.795	0.999916	0.0612725	0.798834	0.999901	0.00409326	0.986413	0.999678	-0.0160516	0.946756	0.999833	-0.514439	0.0415273	0.718265	0.42627	0.079705	0.999973
AMPD3	-0.217302	0.654928	0.999916	-0.127648	0.792806	0.999901	-0.0241898	0.96029	0.999678	0.484739	0.320261	0.999833	0.60526	0.230509	0.91692	0.861477	0.0797531	0.999973
AC097376.2	0.288762	0.277944	0.999916	0.217378	0.413155	0.999901	0.461069	0.0853683	0.999678	0.250255	0.346534	0.999833	0.446147	0.106655	0.840971	0.469525	0.0799163	0.999973
DZIP1L	0.172315	0.758342	0.999916	0.298311	0.594567	0.999901	-0.0223012	0.968227	0.999678	-1.30174	0.0227022	0.958772	0.0631471	0.913078	0.992977	-0.99219	0.0799239	0.999973
FBLN7	-0.217864	0.783816	0.999916	-0.425046	0.592782	0.999901	-0.260442	0.742969	0.999678	1.51461	0.0598736	0.999833	0.505739	0.538117	0.975791	1.40643	0.0800187	0.999973
CD34	0.0772658	0.894723	0.999916	-0.201972	0.729514	0.999901	-0.308298	0.597864	0.999678	-0.426652	0.465847	0.999833	-0.77003	0.204606	0.911318	-1.03408	0.0800923	0.999973
AC078842.1	0.193585	0.805645	0.999916	-0.0888706	0.910049	0.999901	0.0437557	0.955639	0.999678	-0.515819	0.512676	0.999833	-0.525112	0.518876	0.97125	-1.39271	0.0801884	0.999973
RAPGEF1	-0.191924	0.522389	0.999916	-0.285783	0.341775	0.999901	-0.355186	0.238278	0.999678	-0.0955882	0.749751	0.999833	0.328126	0.291164	0.937002	0.530081	0.0803617	0.999973
ESCO2	0.251196	0.627273	0.999916	0.0791593	0.878285	0.999901	-0.301094	0.560707	0.999678	0.480404	0.354242	0.999833	0.853681	0.113399	0.846662	0.914335	0.0804403	0.999973
RTTN	-0.0404128	0.908582	0.999916	0.0829386	0.813729	0.999901	0.0171046	0.961236	0.999678	-0.467606	0.186923	0.999833	-0.152064	0.676007	0.987213	-0.622577	0.0804411	0.999973
ARIH2	-0.0233507	0.819301	0.999916	0.0824104	0.421178	0.999901	-0.00170354	0.9867	0.999678	-0.0255589	0.802558	0.999833	0.0352859	0.738352	0.991747	-0.180788	0.0804416	0.999973
ATP6AP1	-0.0917449	0.482984	0.999916	-0.0464853	0.721881	0.999901	-0.0306667	0.814298	0.999678	-0.31162	0.0194424	0.958772	-0.30358	0.0272078	0.675255	-0.230816	0.0805717	0.999973
ZDHHC14	-0.123411	0.807998	0.999916	-0.471842	0.354326	0.999901	-0.161105	0.751105	0.999678	0.371731	0.465004	0.999833	0.585775	0.266443	0.928225	0.897474	0.0806788	0.999973
MTRNR2L1	0.737172	0.0509011	0.999916	0.632807	0.0925	0.999901	0.659294	0.0799189	0.999678	-0.312279	0.402522	0.999833	-0.497457	0.198479	0.907016	-0.657301	0.0808131	0.999973
MMP19	-0.0501834	0.945675	0.999916	-0.160212	0.827818	0.999901	-0.552023	0.454503	0.999678	0.284536	0.699402	0.999833	0.191586	0.80126	0.991747	1.30058	0.0809563	0.999973
AC011447.7	-0.802376	0.259034	0.999916	-0.419029	0.554148	0.999901	-0.914753	0.198838	0.999678	0.310892	0.660544	0.999833	1.46666	0.0481118	0.742302	1.24893	0.0810281	0.999973
DNASE1	0.261819	0.243548	0.999916	0.152311	0.496014	0.999901	0.125856	0.573538	0.999678	-0.418502	0.0644385	0.999833	-0.566339	0.0164047	0.605677	-0.393999	0.0812547	0.999973
AC007285.1	0.00622516	0.989024	0.999916	-0.758714	0.097148	0.999901	0.0711989	0.874986	0.999678	0.26273	0.562013	0.999833	1.44358	0.00286513	0.429338	0.798288	0.0812632	0.999973
YJEFN3	0.378412	0.286238	0.999916	0.41218	0.245794	0.999901	0.722071	0.0442306	0.999678	0.809032	0.0247409	0.958772	0.395292	0.281003	0.934451	0.623243	0.081264	0.999973
RDM1	0.165332	0.845933	0.999916	0.312998	0.713083	0.999901	0.192476	0.821046	0.999678	-1.60885	0.0620901	0.999833	-0.69183	0.432343	0.966041	-1.50049	0.0813321	0.999973
UGP2	-0.101773	0.416255	0.999916	-0.000361801	0.997688	0.999901	-0.0818759	0.512729	0.999678	0.246947	0.0513464	0.999833	0.141889	0.273667	0.931027	0.220204	0.0813806	0.999973
MAP1LC3C	0.244354	0.703325	0.999916	0.444999	0.488529	0.999901	0.359756	0.575256	0.999678	-0.499435	0.437155	0.999833	-0.632275	0.341631	0.956229	-1.13061	0.0814407	0.999973
NOM1	0.00635459	0.976017	0.999916	-0.0452447	0.830543	0.999901	0.0581755	0.783212	0.999678	-0.141642	0.503548	0.999833	0.0611623	0.779508	0.991747	-0.372673	0.0814498	0.999973
POLR3E	-0.135538	0.413839	0.999916	-0.15811	0.340915	0.999901	0.136666	0.409984	0.999678	-0.267895	0.108887	0.999833	-0.162688	0.342897	0.956551	-0.291585	0.0815385	0.999973
ZNF862	0.372395	0.0625313	0.999916	0.265951	0.180613	0.999901	0.30096	0.130483	0.999678	-0.0667557	0.735163	0.999833	-0.4339	0.0363591	0.708731	-0.347648	0.0815607	0.999973
VAC14-AS1	0.135787	0.840283	0.999916	-0.261464	0.698097	0.999901	0.336285	0.61799	0.999678	-0.0697284	0.917566	0.999833	-1.24773	0.076587	0.80794	-1.18724	0.0815697	0.999973
NOP14	0.0612698	0.700458	0.999916	-0.0248019	0.876189	0.999901	0.141749	0.374645	0.999678	0.326579	0.0434494	0.999833	0.442835	0.0087606	0.555746	0.280513	0.0815745	0.999973
TM4SF1	-0.697035	0.395342	0.999916	0.0353279	0.965542	0.999901	-0.381778	0.640889	0.999678	-0.636534	0.437421	0.999833	-1.03998	0.221066	0.91692	-1.44091	0.081628	0.999973
HSP90AB2P	-0.250888	0.554795	0.999916	0.0381793	0.928293	0.999901	0.0463574	0.91299	0.999678	-1.43444	0.00117754	0.463704	-0.71612	0.105828	0.839415	-0.746915	0.0818601	0.999973
SHLD2P3	0.0742073	0.916353	0.999916	-0.331483	0.639226	0.999901	-0.628874	0.374868	0.999678	-0.0785137	0.911519	0.999833	-0.0914833	0.900274	0.992475	-1.24189	0.0823445	0.999973
MAMDC4	0.423464	0.548003	0.999916	0.17691	0.801608	0.999901	0.0358548	0.959376	0.999678	1.03059	0.146459	0.999833	-1.25019	0.0891731	0.826336	1.23677	0.0824716	0.999973
E2F2	0.343072	0.65181	0.999916	0.106846	0.888157	0.999901	-0.425538	0.575833	0.999678	0.720561	0.344539	0.999833	1.08914	0.168381	0.887396	1.33391	0.0826611	0.999973
AP005061.1	0.0478352	0.929637	0.999916	-0.557524	0.30536	0.999901	0.00145066	0.997863	0.999678	2.06506	0.000294401	0.4335	1.16093	0.04127	0.718265	0.951089	0.0826933	0.999973
AC009403.1	0.385795	0.117007	0.999916	-0.134715	0.580989	0.999901	0.438076	0.0758882	0.999678	0.246818	0.313241	0.999833	0.378846	0.135932	0.85895	0.427771	0.0828691	0.999973
BEAN1	-0.28299	0.51377	0.999916	0.142791	0.741485	0.999901	-0.0849944	0.844286	0.999678	0.103314	0.811314	0.999833	1.01777	0.0255591	0.666021	0.759068	0.0829206	0.999973
ARHGEF38	0.447336	0.294441	0.999916	-0.242385	0.568819	0.999901	0.207393	0.625763	0.999678	-0.207315	0.625894	0.999833	0.100169	0.819532	0.991747	-0.745332	0.0829342	0.999973
TMSB4XP8	-0.174872	0.642528	0.999916	-0.0583958	0.876729	0.999901	0.136781	0.71647	0.999678	-0.700846	0.0661344	0.999833	-0.773961	0.049949	0.742302	-0.660306	0.0829655	0.999973
KIF9	0.104392	0.694022	0.999916	0.186493	0.482752	0.999901	0.0789103	0.766122	0.999678	-0.257034	0.334186	0.999833	-0.575284	0.0389291	0.717626	-0.464848	0.0831868	0.999973
EEF1A1P7	-0.253032	0.610538	0.999916	0.0249715	0.959873	0.999901	0.162384	0.743635	0.999678	-0.782716	0.118252	0.999833	-0.397272	0.439571	0.966679	-0.86996	0.0831885	0.999973
SLC12A1	1.23073	0.0734083	0.999916	0.765367	0.261938	0.999901	0.58413	0.390937	0.999678	0.661301	0.331805	0.999833	2.1211	0.00345428	0.45808	1.18991	0.0832221	0.999973
RHBDF1	-0.167244	0.783962	0.999916	-0.0910046	0.881386	0.999901	-0.248941	0.683318	0.999678	-0.318582	0.601778	0.999833	-1.96751	0.00258435	0.424329	-1.06845	0.083333	0.999973
TRAPPC6A	-0.0822395	0.687492	0.999916	0.0199477	0.922227	0.999901	0.133569	0.513975	0.999678	-0.108834	0.594661	0.999833	-0.294488	0.166157	0.885213	-0.35792	0.0833646	0.999973
IDI2-AS1	0.754397	0.1239	0.999916	0.613029	0.209783	0.999901	0.667121	0.172785	0.999678	0.2923	0.547958	0.999833	0.720293	0.154527	0.871913	0.850906	0.0834195	0.999973
AP000766.1	1.0738	0.0158774	0.999916	0.770506	0.0802324	0.999901	0.91073	0.0395703	0.999678	0.859106	0.0517763	0.999833	0.914254	0.0453321	0.732036	0.761853	0.0836045	0.999973
UNC119B	0.201475	0.360898	0.999916	0.180201	0.413523	0.999901	0.0270464	0.902074	0.999678	-0.318753	0.150274	0.999833	-0.178599	0.432716	0.966041	-0.384409	0.0838684	0.999973
CES3	-0.319924	0.704652	0.999916	-0.140487	0.867744	0.999901	0.477323	0.57197	0.999678	0.666702	0.430433	0.999833	-0.145175	0.867723	0.991747	-1.47472	0.0839814	0.999973
NEK2	0.222354	0.68098	0.999916	0.240109	0.65711	0.999901	-0.137271	0.799562	0.999678	1.19846	0.029497	0.999833	1.39321	0.0147852	0.600325	0.944888	0.0839843	0.999973
TRAF3IP2	-0.16986	0.609762	0.999916	0.127812	0.700806	0.999901	-0.00948019	0.977251	0.999678	-0.0940392	0.777348	0.999833	-0.0214402	0.950231	0.995108	0.581115	0.0840288	0.999973
PACSIN3	-0.0913719	0.893025	0.999916	0.106626	0.875304	0.999901	-0.268381	0.693004	0.999678	-1.2615	0.066856	0.999833	-0.670165	0.341432	0.956229	-1.18741	0.0840718	0.999973
AC087385.2	0.623402	0.263361	0.999916	0.352628	0.525586	0.999901	1.14482	0.042247	0.999678	-0.602499	0.279554	0.999833	-1.05536	0.0690632	0.790167	-0.968836	0.0842461	0.999973
CKAP2L	0.17834	0.779952	0.999916	0.0288594	0.963929	0.999901	-0.111761	0.860992	0.999678	-1.33657	0.0393901	0.999833	0.217794	0.741264	0.991747	-1.11453	0.0842805	0.999973
LINC02019	0.277026	0.668199	0.999916	0.110139	0.864607	0.999901	0.384319	0.552353	0.999678	-0.737998	0.255562	0.999833	0.170586	0.798283	0.991747	-1.12752	0.0844082	0.999973
TEDC1	-0.141657	0.587935	0.999916	0.0178902	0.945383	0.999901	-0.0304351	0.907225	0.999678	0.273927	0.296246	0.999833	0.371756	0.171366	0.890224	0.455628	0.084589	0.999973
AC025774.1	0.4817	0.30491	0.999916	0.181062	0.698761	0.999901	0.322292	0.491461	0.999678	-0.319997	0.49454	0.999833	0.248894	0.606801	0.981746	0.815812	0.0845971	0.999973
SLC41A1	0.110024	0.626044	0.999916	0.0371444	0.86922	0.999901	-0.117965	0.601389	0.999678	-0.396544	0.0823151	0.999833	-0.14469	0.535331	0.974075	-0.393515	0.0846288	0.999973
CBX3P9	0.00633633	0.987093	0.999916	0.0170851	0.965207	0.999901	0.4511	0.251846	0.999678	-0.311948	0.426899	0.999833	-0.994121	0.0163125	0.605677	-0.683112	0.0846999	0.999973
AC093512.2	0.127143	0.662963	0.999916	-0.0586352	0.840614	0.999901	-0.0694334	0.811781	0.999678	0.782005	0.00900317	0.7899	0.126078	0.675723	0.987213	0.508321	0.0847663	0.999973
MIR4482	0.13573	0.771554	0.999916	0.102881	0.825789	0.999901	0.233633	0.617464	0.999678	-0.232884	0.61859	0.999833	-0.257064	0.59486	0.981723	-0.814794	0.084803	0.999973
HPDL	0.469266	0.453293	0.999916	0.651255	0.29895	0.999901	-0.630821	0.314245	0.999678	0.330653	0.596807	0.999833	0.203592	0.752405	0.991747	1.0886	0.0848043	0.999973
AC034193.1	-0.614543	0.160432	0.999916	-0.0419482	0.923089	0.999901	0.155006	0.721407	0.999678	-0.83515	0.0580343	0.999833	-0.312394	0.487318	0.966679	-0.757109	0.0849743	0.999973
AC141586.1	0.110723	0.610394	0.999916	0.342445	0.118168	0.999901	0.388263	0.0772509	0.999678	0.474379	0.0318538	0.999833	0.0198246	0.929574	0.9944	0.378051	0.0851677	0.999973
APEX1	-0.00175702	0.98875	0.999916	0.0426471	0.732288	0.999901	-0.0402573	0.746748	0.999678	-0.0779132	0.532429	0.999833	-0.194676	0.133902	0.858567	-0.216993	0.0851808	0.999973
PPIAP22	-0.0236288	0.892289	0.999916	0.0372947	0.830782	0.999901	0.0327404	0.851182	0.999678	-0.292011	0.0977692	0.999833	-0.30566	0.0935444	0.826336	-0.303707	0.0853205	0.999973
SLC25A44	-0.00267202	0.984673	0.999916	-0.0668785	0.630938	0.999901	-0.00856876	0.950877	0.999678	-0.142548	0.307377	0.999833	-0.0638061	0.657286	0.985219	-0.242006	0.0854258	0.999973
MED22	-0.0304661	0.834325	0.999916	0.0649765	0.655733	0.999901	-0.0396542	0.785465	0.999678	-0.119347	0.413719	0.999833	-0.228618	0.132069	0.855163	-0.253148	0.0857315	0.999973
SOX21-AS1	-0.139263	0.830149	0.999916	-0.34743	0.592887	0.999901	-0.353313	0.586656	0.999678	0.328529	0.613118	0.999833	0.793409	0.23932	0.919158	1.1282	0.0857518	0.999973
EXOC5P1	0.0428199	0.849647	0.999916	0.0556691	0.805349	0.999901	0.022738	0.919809	0.999678	-0.108312	0.631833	0.999833	-0.0997787	0.669168	0.985951	-0.392444	0.0858332	0.999973
MKRN4P	0.154499	0.823183	0.999916	0.208136	0.763429	0.999901	0.402287	0.561117	0.999678	-1.38061	0.0491502	0.999833	-1.17193	0.104362	0.838141	-1.20005	0.0861259	0.999973
CKS1BP3	-0.338992	0.510745	0.999916	-0.95675	0.0664924	0.999901	-0.315686	0.540142	0.999678	-0.590404	0.253631	0.999833	-0.776076	0.147654	0.866715	-0.89323	0.0861461	0.999973
VTCN1	0.294356	0.675648	0.999916	-0.689744	0.328341	0.999901	-0.790204	0.263336	0.999678	0.163685	0.815934	0.999833	1.09567	0.134829	0.85895	1.21964	0.0863312	0.999973
RPL28	-0.0250632	0.903506	0.999916	-0.0023738	0.990838	0.999901	0.164523	0.427245	0.999678	-0.412253	0.0494767	0.999833	-0.53888	0.0137459	0.597025	-0.358531	0.0864151	0.999973
LYPD3	0.54316	0.450837	0.999916	-0.364293	0.612626	0.999901	0.21561	0.764278	0.999678	-0.389432	0.588375	0.999833	-0.753234	0.312371	0.946367	-1.24607	0.0865429	0.999973
SLC22A3	0.645793	0.478653	0.999916	-0.32936	0.717466	0.999901	-0.275925	0.761747	0.999678	-1.6288	0.0769434	0.999833	-2.03502	0.03341	0.708731	-1.57692	0.0865935	0.999973
HOXA3	0.0634088	0.943645	0.999916	-0.231206	0.796645	0.999901	-0.0998667	0.911354	0.999678	-0.750339	0.404138	0.999833	-1.50001	0.109058	0.845916	-1.55471	0.0866076	0.999973
EPHB4	-0.104924	0.900062	0.999916	-0.441297	0.597742	0.999901	-0.645446	0.440824	0.999678	1.01771	0.225799	0.999833	1.46924	0.0922889	0.826336	1.44798	0.0866204	0.999973
TTC4	-0.455847	0.12071	0.999916	-0.341328	0.243331	0.999901	-0.319653	0.274253	0.999678	-0.0990736	0.733639	0.999833	-0.630657	0.0391196	0.717674	-0.504118	0.0867837	0.999973
LRRC37A5P	-0.142246	0.833324	0.999916	0.46583	0.491448	0.999901	0.543718	0.422257	0.999678	-0.471651	0.486071	0.999833	-1.06565	0.130379	0.853388	-1.16998	0.0869787	0.999973
FLOT2	-0.0237785	0.844634	0.999916	-0.0182995	0.880114	0.999901	-0.018014	0.881971	0.999678	-0.188012	0.124641	0.999833	-0.149551	0.235395	0.91692	-0.209953	0.0870849	0.999973
INSYN2B	-0.126525	0.826878	0.999916	0.0851325	0.882995	0.999901	0.0766934	0.894521	0.999678	-0.932223	0.110525	0.999833	-0.686825	0.252846	0.925991	-1.00075	0.0871523	0.999973
AC092718.4	0.519509	0.320787	0.999916	0.413476	0.428766	0.999901	0.519865	0.320458	0.999678	-1.3936	0.00922506	0.798588	0.231343	0.667745	0.985855	-0.901645	0.0872331	0.999973
C2orf66	0.902269	0.142784	0.999916	0.678338	0.268831	0.999901	0.822026	0.18121	0.999678	-0.14294	0.814934	0.999833	0.756772	0.232858	0.91692	1.05596	0.0872757	0.999973
ANKS6	-0.0905317	0.898151	0.999916	-0.404378	0.567973	0.999901	-0.778322	0.273352	0.999678	-0.30476	0.66676	0.999833	1.10215	0.134858	0.85895	1.22278	0.0873812	0.999973
CXCL5	-0.214959	0.842677	0.999916	-0.259426	0.81071	0.999901	-0.500781	0.644042	0.999678	-1.4592	0.180852	0.999833	-0.580441	0.604298	0.981746	-1.87171	0.0874754	0.999973
ZNF552	0.464472	0.0530336	0.999916	0.263889	0.267006	0.999901	0.123835	0.601097	0.999678	0.666799	0.00620471	0.755118	-0.0298226	0.902911	0.992475	0.408931	0.0874894	0.999973
TMEM44-AS1	0.281345	0.122465	0.999916	0.266391	0.14325	0.999901	0.41514	0.0241302	0.999678	0.00562337	0.975143	0.999833	-0.203474	0.27739	0.931027	-0.311816	0.0875933	0.999973
AC092597.1	-0.367772	0.356864	0.999916	0.581231	0.147323	0.999901	0.230676	0.562554	0.999678	-0.914603	0.0242122	0.958772	-0.458747	0.266712	0.928225	-0.687325	0.0876192	0.999973
Z69733.1	-0.114243	0.737455	0.999916	0.3713	0.277913	0.999901	-0.232363	0.495934	0.999678	0.0830029	0.807535	0.999833	-0.0345926	0.921708	0.993166	0.588417	0.0876619	0.999973
FAM3A	0.0573802	0.730454	0.999916	-0.0631614	0.704542	0.999901	0.0957976	0.565484	0.999678	-0.237185	0.15744	0.999833	-0.240198	0.165718	0.885213	-0.287408	0.0878252	0.999973
ATP5F1CP1	-0.330839	0.375509	0.999916	0.36788	0.324763	0.999901	0.273783	0.462906	0.999678	-0.811087	0.0323022	0.999833	-0.428161	0.26781	0.928698	-0.642509	0.0878504	0.999973
CCDC39	0.597267	0.215101	0.999916	0.287927	0.548275	0.999901	0.813441	0.092976	0.999678	-1.0698	0.0283623	0.992034	-0.245799	0.619715	0.982702	-0.82671	0.0878773	0.999973
ZYG11A	-0.266355	0.737991	0.999916	-0.276694	0.728225	0.999901	-0.476943	0.54956	0.999678	-0.188501	0.81282	0.999833	-1.53691	0.0651281	0.782693	-1.37362	0.0879268	0.999973
SUGCT	0.0903278	0.813377	0.999916	0.172448	0.652396	0.999901	-0.14508	0.704659	0.999678	-0.174892	0.647808	0.999833	-1.0623	0.00887979	0.555746	-0.659628	0.0882093	0.999973
DEDD2	-0.222192	0.148159	0.999916	0.00324241	0.983027	0.999901	0.037316	0.806624	0.999678	-0.281444	0.0683186	0.999833	-0.0673958	0.66888	0.985855	-0.262785	0.0882281	0.999973
ACVR2B-AS1	-0.847944	0.168177	0.999916	-0.842495	0.170888	0.999901	0.276471	0.651059	0.999678	-0.182423	0.76527	0.999833	-0.194217	0.758351	0.991747	-1.05196	0.0885707	0.999973
ELK4	0.264243	0.327058	0.999916	0.0705517	0.792876	0.999901	0.443633	0.102159	0.999678	0.595094	0.0296372	0.999833	0.51449	0.0672859	0.786126	0.462592	0.088604	0.999973
ST13P4	-0.141361	0.691174	0.999916	-0.383302	0.283255	0.999901	0.278386	0.43482	0.999678	-1.32497	0.000391467	0.4335	-0.897938	0.0168517	0.605677	-0.612282	0.0886754	0.999973
SRRM1	0.0539052	0.746076	0.999916	0.121776	0.465198	0.999901	0.252062	0.133207	0.999678	0.0365952	0.825963	0.999833	-0.0986813	0.566481	0.979275	0.286497	0.0886756	0.999973
MAEL	0.14261	0.76141	0.999916	0.133813	0.775711	0.999901	0.0639554	0.891659	0.999678	0.729441	0.123719	0.999833	0.873319	0.0753668	0.805228	0.808333	0.0886948	0.999973
CEP170P1	-0.21394	0.518833	0.999916	-0.205463	0.535481	0.999901	0.0597418	0.856821	0.999678	-0.570599	0.0883653	0.999833	-0.54359	0.11552	0.847994	-0.569895	0.0887499	0.999973
SNHG19	0.328256	0.442824	0.999916	-0.0335854	0.937273	0.999901	-0.168813	0.692597	0.999678	-0.769517	0.0749038	0.999833	-1.1609	0.0102893	0.568666	-0.73448	0.0887942	0.999973
AC107982.3	-0.175599	0.696227	0.999916	0.529626	0.241206	0.999901	0.177255	0.693509	0.999678	-0.502003	0.266375	0.999833	-1.33551	0.00528224	0.499129	-0.773549	0.0888277	0.999973
HSPA8P5	-0.119733	0.72342	0.999916	-0.38654	0.255407	0.999901	0.123439	0.715235	0.999678	-0.622911	0.0689949	0.999833	-0.92091	0.0102116	0.566928	-0.581775	0.0889222	0.999973
PTCHD1	-0.240228	0.64547	0.999916	-0.208851	0.689117	0.999901	-0.0619839	0.905436	0.999678	0.0506777	0.922623	0.999833	-0.472162	0.382493	0.958882	-0.897215	0.0890472	0.999973
BCAS4	-0.129151	0.502825	0.999916	-0.0580653	0.762905	0.999901	-0.149407	0.438523	0.999678	-0.286005	0.140505	0.999833	-0.405422	0.0446919	0.729064	-0.33086	0.0890743	0.999973
SUMO1P3	-0.0417068	0.855262	0.999916	-0.0613955	0.788331	0.999901	0.0310918	0.891829	0.999678	-0.491174	0.0347338	0.999833	-0.393688	0.0991151	0.831319	-0.393079	0.0891012	0.999973
TGM2	0.912947	0.416362	0.999916	-0.151446	0.892485	0.999901	0.263938	0.813803	0.999678	-0.20468	0.855065	0.999833	-0.188002	0.871	0.991747	-1.92602	0.0891646	0.999973
DYDC2	0.0374432	0.923007	0.999916	0.141305	0.715443	0.999901	0.412676	0.288882	0.999678	0.312221	0.421453	0.999833	-0.619278	0.125263	0.851439	0.665655	0.0893137	0.999973
GGA1	-0.123239	0.421343	0.999916	-0.0433102	0.777019	0.999901	-0.0647999	0.671884	0.999678	-0.224434	0.145398	0.999833	-0.359574	0.0255792	0.666021	-0.26268	0.0893181	0.999973
PHKA1	-0.301704	0.16168	0.999916	-0.173721	0.418004	0.999901	-0.201985	0.346798	0.999678	-0.37725	0.0814184	0.999833	-0.536023	0.0176875	0.605677	-0.367497	0.089419	0.999973
TMSB4XP2	0.0776195	0.872722	0.999916	0.250934	0.604858	0.999901	0.618165	0.204784	0.999678	-1.02909	0.0367641	0.999833	-0.948402	0.061607	0.781405	-0.832093	0.0894335	0.999973
CASP7	-0.110705	0.878458	0.999916	-0.161837	0.823121	0.999901	-0.380616	0.599406	0.999678	0.117282	0.8713	0.999833	2.14472	0.00540129	0.499129	1.24318	0.0894554	0.999973
EXTL1	-0.553859	0.238813	0.999916	-0.143206	0.759522	0.999901	-0.687351	0.144929	0.999678	0.55799	0.235366	0.999833	0.88852	0.0694596	0.791928	0.803137	0.0894713	0.999973
MAPK7	0.0887863	0.644934	0.999916	-0.0143047	0.94077	0.999901	-0.201382	0.297568	0.999678	-0.317494	0.10264	0.999833	-0.499087	0.014249	0.598929	-0.330486	0.0895964	0.999973
YWHAZP3	-0.231234	0.362709	0.999916	-0.05118	0.839855	0.999901	0.0263731	0.917056	0.999678	-0.519313	0.0435424	0.999833	-0.608539	0.0226549	0.649123	-0.434592	0.0896807	0.999973
SNX8	-0.270828	0.186783	0.999916	-0.12782	0.531093	0.999901	-0.0675155	0.740493	0.999678	-0.380183	0.065573	0.999833	-0.448458	0.0362579	0.708731	-0.349538	0.0898277	0.999973
EMD	-0.214347	0.0955768	0.999916	-0.227011	0.0779191	0.999901	-0.137185	0.283055	0.999678	-0.222916	0.0833057	0.999833	-0.282558	0.0346454	0.708731	-0.218129	0.0899883	0.999973
EPN2	-0.0685557	0.650733	0.999916	-0.00803227	0.957663	0.999901	0.119099	0.43229	0.999678	-0.367446	0.0175194	0.93194	-0.366459	0.0216516	0.638074	-0.259404	0.0899982	0.999973
AC005255.1	-0.0523896	0.88496	0.999916	-0.724732	0.0486585	0.999901	0.601273	0.100317	0.999678	-0.184181	0.611322	0.999833	0.0738468	0.843535	0.991747	-0.620682	0.0900339	0.999973
ABALON	0.350096	0.142687	0.999916	0.307271	0.197401	0.999901	0.479664	0.046144	0.999678	0.0827672	0.726872	0.999833	-0.220436	0.369197	0.958607	0.405988	0.0900605	0.999973
NFYC-AS1	-0.0671757	0.858379	0.999916	0.144126	0.701963	0.999901	0.489807	0.196077	0.999678	1.02585	0.00801645	0.779381	0.963102	0.0155063	0.601382	0.645216	0.0900685	0.999973
PPP1R42	0.537965	0.428726	0.999916	0.469101	0.489897	0.999901	0.702075	0.302523	0.999678	0.657862	0.333748	0.999833	0.477477	0.496348	0.967231	1.16221	0.0901171	0.999973
AC026471.2	-0.434247	0.419465	0.999916	-0.491412	0.36125	0.999901	-0.126415	0.813762	0.999678	0.652544	0.226514	0.999833	0.087568	0.874491	0.991747	0.919137	0.090236	0.999973
ARHGAP19	-0.210332	0.412748	0.999916	-0.141161	0.581985	0.999901	-0.347667	0.177706	0.999678	-0.0714376	0.780375	0.999833	0.00332874	0.989964	0.999791	-0.438568	0.0903972	0.999973
HMGB1	0.0290929	0.81063	0.999916	0.0593162	0.625412	0.999901	-0.0487771	0.687997	0.999678	0.258367	0.0364022	0.999833	0.13413	0.286992	0.935709	0.20781	0.0904645	0.999973
NFKBIZ	-0.264277	0.637545	0.999916	-0.130398	0.81606	0.999901	-0.570186	0.31091	0.999678	0.343172	0.540921	0.999833	0.652529	0.262131	0.926664	0.958871	0.0906602	0.999973
URI1	-0.0625173	0.787859	0.999916	-0.19995	0.39066	0.999901	-0.224082	0.336389	0.999678	0.152611	0.511846	0.999833	0.37594	0.120669	0.851276	0.397313	0.0907067	0.999973
COL14A1	-0.290529	0.736885	0.999916	0.0654268	0.939663	0.999901	-0.31388	0.716635	0.999678	0.871687	0.31511	0.999833	1.23769	0.168896	0.888418	1.47848	0.0907233	0.999973
STEAP2	-0.439089	0.281697	0.999916	-0.207121	0.610349	0.999901	-0.323722	0.426443	0.999678	0.29497	0.468478	0.999833	0.396925	0.345757	0.956785	0.694501	0.0907507	0.999973
TMEM11	-0.0296483	0.814921	0.999916	-0.0184539	0.884143	0.999901	-0.0792436	0.532076	0.999678	-0.193672	0.129562	0.999833	-0.235163	0.0758201	0.806755	-0.216557	0.0907941	0.999973
AP003486.1	0.475163	0.189493	0.999916	0.519999	0.151568	0.999901	0.283623	0.431551	0.999678	-0.351827	0.329842	0.999833	-0.779051	0.0392457	0.718089	-0.615172	0.090805	0.999973
AC112777.1	0.303099	0.574187	0.999916	0.11437	0.831915	0.999901	-0.195825	0.71639	0.999678	-1.4592	0.00839309	0.780827	-0.904341	0.107761	0.843274	-0.920729	0.0910114	0.999973
AC021037.1	0.478581	0.205969	0.999916	0.241533	0.521364	0.999901	0.531977	0.160377	0.999678	-0.240302	0.523482	0.999833	-0.354962	0.362498	0.958022	-0.641998	0.091348	0.999973
AC099343.3	0.110423	0.777167	0.999916	0.0736098	0.850333	0.999901	-0.010055	0.979434	0.999678	-0.172964	0.657691	0.999833	-0.29573	0.463992	0.966679	-0.665864	0.0913542	0.999973
AL663058.1	0.463457	0.287641	0.999916	0.536048	0.219427	0.999901	0.131621	0.761738	0.999678	-0.689025	0.115814	0.999833	-0.423305	0.346771	0.956785	-0.740695	0.0914042	0.999973
RAB6D	-0.305149	0.248756	0.999916	-0.259662	0.325686	0.999901	-0.0534896	0.838986	0.999678	-0.114645	0.66338	0.999833	0.27276	0.317744	0.946676	-0.44889	0.0916625	0.999973
TUBD1	0.135206	0.594022	0.999916	0.186663	0.462255	0.999901	0.171333	0.499683	0.999678	-0.0127187	0.959967	0.999833	-0.503286	0.058	0.770286	-0.431938	0.0918085	0.999973
RBMS2	-0.134147	0.63408	0.999916	-0.147887	0.59983	0.999901	-0.173991	0.537235	0.999678	0.204148	0.469348	0.999833	-0.0974873	0.737669	0.991747	0.479972	0.0918292	0.999973
STOML2	-0.0112317	0.938193	0.999916	0.0425696	0.768912	0.999901	0.0618459	0.669615	0.999678	-0.0714622	0.622081	0.999833	-0.166688	0.267643	0.928689	-0.246873	0.0918637	0.999973
BX322234.1	0.137129	0.822646	0.999916	0.238314	0.696994	0.999901	0.126475	0.836217	0.999678	-0.489141	0.425041	0.999833	-1.38164	0.0317751	0.707959	-1.04233	0.0919249	0.999973
CASTOR1	0.229935	0.688405	0.999916	0.390182	0.496691	0.999901	0.134667	0.814237	0.999678	-0.625696	0.277066	0.999833	0.586843	0.323415	0.948951	0.976215	0.0920031	0.999973
NPRL2	0.02657	0.855013	0.999916	0.121522	0.404516	0.999901	0.105934	0.467148	0.999678	-0.0366688	0.800927	0.999833	-0.107134	0.476596	0.966679	-0.247675	0.0920252	0.999973
BVES-AS1	0.0938497	0.859459	0.999916	0.377546	0.477087	0.999901	0.317713	0.549399	0.999678	0.39608	0.455817	0.999833	0.313183	0.567847	0.979275	0.90206	0.0922915	0.999973
AC092807.3	0.53951	0.407436	0.999916	0.694352	0.287182	0.999901	0.307033	0.636716	0.999678	-1.0919	0.0962948	0.999833	-0.867884	0.198804	0.907019	-1.10552	0.0923025	0.999973
SLC18A1	-0.0775287	0.926183	0.999916	-0.356326	0.670448	0.999901	-0.37342	0.655658	0.999678	1.84868	0.0300743	0.999833	1.80269	0.0402516	0.718265	1.42409	0.0923339	0.999973
ZNF526	0.0223475	0.920052	0.999916	-0.077019	0.72952	0.999901	-0.167165	0.453753	0.999678	-0.434496	0.0544078	0.999833	-0.640789	0.00679343	0.520399	-0.378842	0.0923969	0.999973
AL162411.1	0.267659	0.691837	0.999916	0.165444	0.806387	0.999901	0.114823	0.864915	0.999678	0.0234459	0.972286	0.999833	-0.911742	0.193941	0.903971	-1.14823	0.0924231	0.999973
RPE65	-0.0294041	0.968943	0.999916	-0.175453	0.816329	0.999901	-0.440183	0.56051	0.999678	-1.12872	0.138382	0.999833	-0.385709	0.621422	0.982702	-1.2845	0.0925322	0.999973
ZFYVE1	0.0955602	0.53133	0.999916	0.0604969	0.691624	0.999901	0.0135431	0.929203	0.999678	-0.234529	0.127309	0.999833	-0.0533342	0.734983	0.991747	-0.259201	0.0925894	0.999973
AC002074.1	0.174672	0.837413	0.999916	0.238068	0.779753	0.999901	0.0255255	0.976073	0.999678	-1.22058	0.15476	0.999833	-0.076354	0.930808	0.9944	-1.4465	0.0927559	0.999973
ACOT8	-0.171432	0.29059	0.999916	-0.0710409	0.660284	0.999901	-0.102715	0.525448	0.999678	-0.139359	0.389585	0.999833	-0.241028	0.151892	0.868419	-0.274387	0.0928974	0.999973
ZBED3-AS1	0.258056	0.419032	0.999916	0.142519	0.654814	0.999901	0.151711	0.634167	0.999678	0.464	0.148478	0.999833	0.360589	0.275444	0.931027	0.541071	0.0929364	0.999973
KAT6A	0.100261	0.535351	0.999916	0.146393	0.366235	0.999901	0.219039	0.178079	0.999678	-0.0670502	0.678232	0.999833	-0.290112	0.0856747	0.822409	-0.274265	0.0930312	0.999973
GRID2	0.262214	0.568551	0.999916	0.0848627	0.85343	0.999901	-0.0629308	0.891026	0.999678	-0.983135	0.0353862	0.999833	-1.49876	0.00232334	0.421746	-0.77986	0.0930696	0.999973
SCRG1	-0.0184208	0.962827	0.999916	-0.123439	0.754893	0.999901	-0.232429	0.557015	0.999678	1.20643	0.00317763	0.671294	0.142055	0.728068	0.991747	0.671069	0.0930859	0.999973
TMEM102	-0.44565	0.587144	0.999916	-0.588896	0.473436	0.999901	-0.71587	0.383946	0.999678	-1.55899	0.0606872	0.999833	-1.507	0.0787686	0.811162	-1.39071	0.0933672	0.999973
AL158212.3	0.0883247	0.754025	0.999916	0.0718091	0.798893	0.999901	0.134592	0.633197	0.999678	0.0982244	0.727521	0.999833	-0.00959607	0.973706	0.997652	0.477902	0.0934329	0.999973
TENT4B	0.1852	0.571572	0.999916	-0.135843	0.677994	0.999901	-0.0773117	0.813115	0.999678	0.0692577	0.832271	0.999833	0.238911	0.480273	0.966679	0.554521	0.0934351	0.999973
RABGGTA	-0.108457	0.512219	0.999916	-0.0716602	0.664697	0.999901	0.0690492	0.676191	0.999678	-0.297933	0.0748751	0.999833	-0.426394	0.0146663	0.600325	-0.279974	0.0936922	0.999973
AC243960.2	-0.110874	0.790916	0.999916	0.0274	0.947747	0.999901	0.242546	0.562332	0.999678	-0.622156	0.140061	0.999833	-0.378521	0.382296	0.958882	-0.708107	0.0938767	0.999973
STX11	-0.979245	0.220233	0.999916	-0.336456	0.672019	0.999901	-0.752535	0.344999	0.999678	-0.58424	0.462856	0.999833	-1.04585	0.205261	0.911318	-1.34498	0.0938881	0.999973
CCT8P1	-0.0818182	0.771868	0.999916	-0.122901	0.663318	0.999901	0.0644901	0.819214	0.999678	-0.658535	0.0221855	0.958772	-0.442529	0.132343	0.85598	-0.477649	0.0939777	0.999973
TRPC1	-0.103969	0.580177	0.999916	-0.146758	0.435478	0.999901	-0.0981049	0.601672	0.999678	0.191398	0.309918	0.999833	0.410186	0.0375934	0.714171	0.317519	0.0943413	0.999973
AC133552.5	0.445461	0.190874	0.999916	0.290337	0.392131	0.999901	0.581664	0.0891138	0.999678	-0.392698	0.248187	0.999833	-0.372105	0.289189	0.936476	-0.57199	0.0944408	0.999973
RPL4P4	-0.237431	0.324393	0.999916	-0.136841	0.56909	0.999901	0.0930533	0.698419	0.999678	-0.451609	0.0633935	0.999833	-0.46594	0.0637622	0.781878	-0.405716	0.0945205	0.999973
MAPKAPK2	-0.201544	0.43731	0.999916	-0.145956	0.573343	0.999901	-0.598496	0.0234443	0.999678	-0.0496168	0.848023	0.999833	0.112468	0.674332	0.987027	0.43745	0.0946046	0.999973
CA8	-0.465343	0.476763	0.999916	-0.201289	0.757879	0.999901	-0.0222287	0.972833	0.999678	1.12419	0.0885748	0.999833	2.47999	0.000458766	0.300494	1.10271	0.0946956	0.999973
AC015813.5	-0.291234	0.381961	0.999916	-0.268211	0.420511	0.999901	-0.468765	0.161304	0.999678	-0.230359	0.488744	0.999833	-0.538157	0.120275	0.851276	-0.561077	0.0946996	0.999973
NCOA4P4	0.630778	0.127701	0.999916	1.50184	0.000485977	0.999901	0.757193	0.0685464	0.999678	-0.459788	0.264857	0.999833	-0.723323	0.0915842	0.826336	-0.693244	0.0947225	0.999973
FSIP1	0.0477171	0.898862	0.999916	-0.037834	0.919728	0.999901	0.196104	0.601794	0.999678	0.663918	0.0805301	0.999833	0.537619	0.168854	0.888418	0.634022	0.0947925	0.999973
ARNTL	-0.0385344	0.871553	0.999916	-0.0589211	0.804758	0.999901	0.0213672	0.928557	0.999678	-0.0593692	0.803304	0.999833	-0.0836491	0.73417	0.991747	-0.402349	0.0948871	0.999973
RPS6KA3	-0.282074	0.425834	0.999916	-0.333757	0.346536	0.999901	-0.366238	0.30197	0.999678	0.42417	0.232547	0.999833	0.740228	0.045896	0.732098	0.596463	0.0949502	0.999973
SQOR	-0.242986	0.770704	0.999916	0.0773418	0.926065	0.999901	-0.193063	0.816848	0.999678	-1.31207	0.118882	0.999833	-0.653773	0.448729	0.966679	1.40643	0.0950532	0.999973
ROPN1L	0.367656	0.305663	0.999916	0.294258	0.411613	0.999901	0.73154	0.0439643	0.999678	-0.854561	0.0192769	0.958772	-0.803202	0.0326447	0.708731	-0.60313	0.095095	0.999973
TTC3	-0.099932	0.48969	0.999916	-0.0344217	0.811621	0.999901	0.09849	0.495955	0.999678	0.134445	0.35341	0.999833	0.166293	0.267286	0.928225	0.243544	0.0952172	0.999973
JAG1	-0.260252	0.7079	0.999916	-0.73854	0.289502	0.999901	-0.892771	0.201296	0.999678	0.628187	0.367043	0.999833	1.09732	0.129464	0.851439	1.17038	0.0953683	0.999973
AC008060.1	-0.196665	0.725508	0.999916	-0.145917	0.79443	0.999901	0.224102	0.689132	0.999678	-0.0660459	0.906098	0.999833	-0.415184	0.473795	0.966679	-0.942935	0.0956864	0.999973
FTH1P23	-0.255196	0.465139	0.999916	-0.033955	0.922423	0.999901	0.33109	0.343995	0.999678	-0.878554	0.0138608	0.901248	-0.943923	0.0106417	0.569187	-0.587079	0.0957704	0.999973
SLC35A2	-0.0350354	0.809869	0.999916	-0.0263131	0.856592	0.999901	-0.107788	0.46003	0.999678	-0.185007	0.206621	0.999833	-0.248574	0.101966	0.836854	-0.245089	0.0958375	0.999973
AC009533.1	0.473392	0.594969	0.999916	0.0446975	0.959921	0.999901	0.12385	0.889265	0.999678	0.803595	0.36778	0.999833	1.47769	0.111344	0.845916	1.49673	0.0959679	0.999973
RPL13AP5	0.134302	0.587926	0.999916	0.233311	0.347653	0.999901	0.319788	0.199345	0.999678	-0.640655	0.0116013	0.881015	-0.676266	0.00999484	0.561977	-0.416609	0.0959745	0.999973
HOXA7	0.137837	0.855992	0.999916	0.143023	0.850638	0.999901	0.129344	0.864775	0.999678	-0.213439	0.778735	0.999833	-1.55765	0.0504895	0.743522	-1.27691	0.0962309	0.999973
CTXND1	-0.613991	0.392408	0.999916	-0.54109	0.450737	0.999901	-0.657979	0.35959	0.999678	2.00787	0.00643979	0.755118	1.3308	0.0755239	0.805826	1.2035	0.0962759	0.999973
CCDC57	0.199255	0.526066	0.999916	0.250466	0.425883	0.999901	0.297502	0.344741	0.999678	-0.868059	0.00716116	0.757874	-0.655963	0.0463425	0.734754	-0.527515	0.0962804	0.999973
SOX1-OT	0.027172	0.972368	0.999916	-0.275588	0.72548	0.999901	-0.0353382	0.964069	0.999678	0.00646811	0.993421	0.999833	-1.48105	0.0711843	0.795729	-1.31809	0.0964538	0.999973
PEX16	-0.0501718	0.766019	0.999916	-0.0306804	0.855571	0.999901	-0.0118883	0.943767	0.999678	-0.293556	0.0851055	0.999833	-0.387137	0.0290888	0.691798	-0.282964	0.0967114	0.999973
CPM	-0.721518	0.469094	0.999916	-0.739621	0.458062	0.999901	-1.37764	0.169142	0.999678	-0.141443	0.886924	0.999833	-1.54012	0.137309	0.85895	-1.66908	0.0968689	0.999973
AURKB	0.0559913	0.944011	0.999916	0.239078	0.764349	0.999901	-0.218044	0.784533	0.999678	-0.433766	0.586816	0.999833	-1.88201	0.0250623	0.665173	-1.33733	0.0970031	0.999973
AP000892.3	-0.668236	0.280486	0.999916	-0.898985	0.147992	0.999901	-0.931432	0.134135	0.999678	0.0813472	0.895011	0.999833	0.821451	0.199966	0.907802	1.0339	0.0970185	0.999973
PSD4	-0.35763	0.57267	0.999916	0.164426	0.795159	0.999901	-0.302955	0.632618	0.999678	0.0191403	0.975884	0.999833	-0.163574	0.802607	0.991747	-1.06196	0.0970496	0.999973
FAM27E3	-0.170628	0.849717	0.999916	-0.632928	0.482919	0.999901	0.234776	0.794336	0.999678	1.40026	0.123342	0.999833	3.28419	0.000736607	0.303214	1.50983	0.0971122	0.999973
ENGASE	0.0467999	0.84255	0.999916	-0.0351885	0.881269	0.999901	0.0229134	0.922518	0.999678	-0.411556	0.0841901	0.999833	-0.277223	0.257087	0.926562	-0.394991	0.0971436	0.999973
PPP2CB	-0.0823741	0.657628	0.999916	-0.1538	0.408851	0.999901	-0.158699	0.39417	0.999678	0.152849	0.41174	0.999833	0.0506729	0.791782	0.991747	0.31135	0.0972045	0.999973
PIP5K1B	-0.256877	0.660121	0.999916	-0.130773	0.822763	0.999901	-0.0185971	0.974584	0.999678	-0.720248	0.219928	0.999833	-1.47209	0.016979	0.605677	-0.978322	0.097276	0.999973
HNRNPKP1	-0.208363	0.458329	0.999916	-0.0953508	0.733899	0.999901	-0.150866	0.59092	0.999678	-0.127748	0.648906	0.999833	-0.354745	0.223378	0.91692	-0.469796	0.0973499	0.999973
AC091078.1	0.0270465	0.969191	0.999916	0.0395621	0.954947	0.999901	0.299334	0.669267	0.999678	0.309003	0.659262	0.999833	-1.79234	0.015471	0.601382	-1.17321	0.0974056	0.999973
SLC26A11	-0.106092	0.49725	0.999916	0.0961593	0.538249	0.999901	0.00734203	0.962465	0.999678	-0.253994	0.107026	0.999833	-0.363133	0.0270854	0.675255	-0.261326	0.0974668	0.999973
RPS28P7	-0.332765	0.291821	0.999916	-0.231024	0.463272	0.999901	-0.00076277	0.998064	0.999678	-0.412863	0.19194	0.999833	-0.910225	0.00647612	0.517117	-0.526386	0.0975393	0.999973
AC104581.4	0.1506	0.719878	0.999916	-0.242985	0.563159	0.999901	0.210526	0.616313	0.999678	1.2756	0.00330376	0.682227	0.38648	0.374296	0.958882	0.702475	0.0977487	0.999973
CUL9	0.149679	0.584727	0.999916	0.0594096	0.828113	0.999901	0.0062178	0.981867	0.999678	-0.25196	0.358625	0.999833	-0.0475219	0.8665	0.991747	-0.457699	0.0978639	0.999973
NRSN2-AS1	-0.174759	0.471717	0.999916	-0.0889793	0.713636	0.999901	0.346201	0.156346	0.999678	0.0864039	0.721567	0.999833	-0.290334	0.248679	0.922116	-0.405139	0.0981102	0.999973
AP002748.3	-0.182334	0.616142	0.999916	-0.0412628	0.909589	0.999901	0.109177	0.763896	0.999678	0.374289	0.304936	0.999833	0.377789	0.316151	0.946626	0.607422	0.0981215	0.999973
AC022107.1	-0.0339018	0.8761	0.999916	-0.172519	0.428614	0.999901	0.22606	0.300468	0.999678	-0.0300537	0.890067	0.999833	-0.109367	0.626676	0.982702	-0.363421	0.09816	0.999973
AL034379.1	-0.0074171	0.985816	0.999916	-0.358852	0.391063	0.999901	-0.33381	0.424787	0.999678	-0.720295	0.0878162	0.999833	-1.18421	0.0075496	0.550993	-0.697168	0.0982526	0.999973
ZMAT1	0.482037	0.126577	0.999916	0.38257	0.22378	0.999901	0.505608	0.109373	0.999678	0.500548	0.112898	0.999833	0.860024	0.00951238	0.561977	0.522395	0.0983148	0.999973
DDX11-AS1	-0.627386	0.070702	0.999916	0.489987	0.156047	0.999901	0.085569	0.802894	0.999678	0.469771	0.173571	0.999833	0.542026	0.129268	0.851439	0.572501	0.0983873	0.999973
ZNRD2	-0.151185	0.545006	0.999916	-0.183958	0.461751	0.999901	-0.0997562	0.689386	0.999678	-0.0728464	0.770321	0.999833	0.159033	0.537774	0.975596	0.416462	0.0985308	0.999973
CACFD1	-0.0456798	0.771958	0.999916	-0.110177	0.485224	0.999901	-0.0708647	0.653147	0.999678	-0.156187	0.323395	0.999833	-0.224883	0.170282	0.888837	-0.263004	0.0986258	0.999973
HSP90AA2P	-0.0594116	0.796752	0.999916	0.126746	0.583037	0.999901	0.229017	0.32252	0.999678	-0.582904	0.013582	0.901248	-0.591471	0.0152714	0.600903	-0.384913	0.0986487	0.999973
AL390800.1	-0.14274	0.854522	0.999916	-0.140861	0.856416	0.999901	-0.20812	0.789243	0.999678	0.491569	0.528345	0.999833	2.1036	0.0107743	0.569187	1.29895	0.0987128	0.999973
AC007256.1	-0.266619	0.480332	0.999916	-0.0277533	0.941324	0.999901	-0.0356612	0.92465	0.999678	-0.366917	0.332245	0.999833	-0.738861	0.061351	0.781405	-0.629058	0.0987778	0.999973
NDC80	0.234651	0.693098	0.999916	0.195749	0.741939	0.999901	-0.0160557	0.978444	0.999678	-0.0230255	0.96909	0.999833	0.175561	0.774983	0.991747	-0.991259	0.0988213	0.999973
NDUFA13	0.188491	0.60913	0.999916	0.183718	0.618208	0.999901	0.383261	0.300022	0.999678	-0.669949	0.0724179	0.999833	-1.32582	0.000852048	0.303214	-0.614213	0.0988874	0.999973
AC005736.1	-0.975975	0.328386	0.999916	0.0226122	0.981867	0.999901	-0.56216	0.572511	0.999678	0.0165249	0.986748	0.999833	0.397508	0.699135	0.988974	-1.65861	0.0990267	0.999973
ARMC3	0.194162	0.775251	0.999916	0.112333	0.868771	0.999901	0.161891	0.811818	0.999678	0.5207	0.444753	0.999833	-0.657725	0.350705	0.957323	1.13326	0.0990626	0.999973
AL353622.1	0.515361	0.53167	0.999916	0.152469	0.852996	0.999901	0.426074	0.604916	0.999678	2.07214	0.0139016	0.901248	0.487527	0.56678	0.979275	1.37105	0.0991588	0.999973
RPL5P1	0.134268	0.713875	0.999916	0.0337012	0.926638	0.999901	0.513571	0.163728	0.999678	-0.552804	0.134324	0.999833	-0.787714	0.0404425	0.718265	-0.60956	0.0993649	0.999973
GRIN2D	-0.364529	0.562711	0.999916	-0.418081	0.506958	0.999901	-0.280616	0.655732	0.999678	1.07886	0.0898471	0.999833	0.623797	0.338816	0.955627	1.04748	0.099371	0.999973
TUBGCP4	0.132016	0.341232	0.999916	0.138778	0.317253	0.999901	0.252918	0.0708143	0.999678	-0.0904461	0.513587	0.999833	-0.149211	0.29815	0.939444	-0.230159	0.0994287	0.999973
HSPE1P2	0.357124	0.273098	0.999916	0.174457	0.591074	0.999901	0.525982	0.108379	0.999678	-0.851622	0.0104876	0.849699	-0.250509	0.455712	0.966679	-0.540002	0.099468	0.999973
ZNF16	-0.0482366	0.7715	0.999916	0.22866	0.171576	0.999901	0.00697449	0.966495	0.999678	-0.165162	0.321727	0.999833	0.155618	0.365876	0.958022	-0.276241	0.0997155	0.999973
TSTD3	0.177079	0.486976	0.999916	0.207036	0.416695	0.999901	0.0134724	0.957744	0.999678	0.0947235	0.709642	0.999833	0.280084	0.288473	0.936127	0.422819	0.0998719	0.999973
DYNC2LI1	0.0465817	0.754733	0.999916	0.128697	0.389254	0.999901	0.168075	0.261804	0.999678	0.215833	0.150863	0.999833	0.147566	0.339662	0.955875	0.247834	0.0998999	0.999973
AL592293.1	0.0543493	0.884955	0.999916	0.19362	0.606572	0.999901	0.530038	0.16137	0.999678	-0.161683	0.667077	0.999833	0.00121417	0.997504	0.99984	-0.624454	0.099937	0.999973
AL096803.2	0.41105	0.301482	0.999916	1.0052	0.0132437	0.999901	1.22189	0.00289401	0.999678	0.288405	0.467539	0.999833	-0.0300072	0.941562	0.994789	0.658667	0.0999372	0.999973
MRPS26	-0.0364929	0.800089	0.999916	0.0589503	0.682609	0.999901	0.0142716	0.921095	0.999678	-0.184696	0.202696	0.999833	-0.153681	0.303866	0.943371	-0.239486	0.1	0.999973
INPP5D	0.0964872	0.902527	0.999916	-0.300772	0.702779	0.999901	-0.151635	0.847388	0.999678	2.07732	0.01018	0.830612	0.664954	0.415169	0.962742	1.30934	0.100047	0.999973
GTF3C4	0.0984636	0.479737	0.999916	0.115581	0.407114	0.999901	0.106309	0.445588	0.999678	0.0662479	0.634075	0.999833	0.067694	0.637809	0.983071	0.230956	0.10027	0.999973
MARCKS	-0.0320356	0.928713	0.999916	-0.133401	0.70963	0.999901	-0.214033	0.550566	0.999678	0.307683	0.391537	0.999833	0.400672	0.280977	0.934451	0.594701	0.100283	0.999973
FO393411.1	-0.583204	0.275895	0.999916	-0.64223	0.230645	0.999901	-0.57483	0.282787	0.999678	-0.177179	0.739583	0.999833	-0.862459	0.120635	0.851276	-0.884814	0.100309	0.999973
METTL18	0.143895	0.44147	0.999916	0.161426	0.388151	0.999901	0.175498	0.348391	0.999678	0.379897	0.044949	0.999833	0.415698	0.0340365	0.708731	0.309701	0.100363	0.999973
TGS1	0.276665	0.048839	0.999916	-0.0147925	0.914844	0.999901	0.102752	0.458564	0.999678	0.174427	0.21011	0.999833	0.0287292	0.840717	0.991747	0.229633	0.10045	0.999973
RABEP2	0.0744558	0.77421	0.999916	0.0504864	0.845743	0.999901	0.206486	0.427263	0.999678	0.0930816	0.719916	0.999833	0.131071	0.625213	0.982702	0.430689	0.100464	0.999973
LIX1L	-0.160209	0.440058	0.999916	-0.115986	0.575763	0.999901	-0.20474	0.324493	0.999678	0.0283483	0.89109	0.999833	0.120629	0.57325	0.980334	0.343567	0.100536	0.999973
GABPB2	0.230244	0.593609	0.999916	-0.0620922	0.885459	0.999901	0.723001	0.096994	0.999678	-0.80515	0.0652522	0.999833	-1.02264	0.0243567	0.659009	-0.715104	0.10062	0.999973
ZNF524	0.0542667	0.8787	0.999916	-0.175555	0.621798	0.999901	0.0126603	0.971595	0.999678	-0.646335	0.0726178	0.999833	0.171499	0.640885	0.983665	0.589807	0.100673	0.999973
TPCN1	-0.495223	0.231274	0.999916	-0.347947	0.398982	0.999901	-0.247685	0.547695	0.999678	-0.330302	0.423197	0.999833	0.208631	0.623871	0.982702	0.682444	0.100682	0.999973
AC022415.2	0.322234	0.645087	0.999916	0.551067	0.431604	0.999901	-0.0504114	0.94251	0.999678	1.24275	0.0789838	0.999833	1.4568	0.0470005	0.738959	1.15914	0.100808	0.999973
METTL1	0.0131749	0.947469	0.999916	0.025996	0.89657	0.999901	0.0169788	0.932335	0.999678	-0.0195051	0.922298	0.999833	-0.338494	0.104869	0.838141	-0.331496	0.100897	0.999973
ATP6V0D1	-0.108382	0.503262	0.999916	-0.0389196	0.809763	0.999901	-0.100388	0.535161	0.999678	-0.208014	0.200976	0.999833	-0.302733	0.0734131	0.799423	-0.267938	0.100922	0.999973
OVGP1	-0.0413063	0.935618	0.999916	0.156177	0.760126	0.999901	0.181397	0.722908	0.999678	0.112691	0.825606	0.999833	0.0478508	0.927836	0.993857	-0.847465	0.100988	0.999973
TEDC2	0.259471	0.225977	0.999916	0.204073	0.339912	0.999901	-0.121493	0.569049	0.999678	-0.452755	0.036713	0.999833	0.145118	0.510511	0.969657	-0.353092	0.101042	0.999973
MAP2K4P1	0.418093	0.158016	0.999916	0.219291	0.456492	0.999901	0.11417	0.697802	0.999678	-0.269517	0.36062	0.999833	-0.228769	0.452162	0.966679	-0.486598	0.101283	0.999973
TMED1	-0.0888765	0.620096	0.999916	-0.00130546	0.994185	0.999901	0.0697125	0.6973	0.999678	0.0839597	0.639543	0.999833	0.00994175	0.957159	0.995285	-0.296154	0.101785	0.999973
GGT5	0.549832	0.578633	0.999916	0.97685	0.325025	0.999901	0.0937467	0.924471	0.999678	-0.601102	0.543832	0.999833	-0.323151	0.751869	0.991747	-1.63482	0.101803	0.999973
ZCCHC24	-0.282852	0.739005	0.999916	-0.538574	0.526295	0.999901	-0.913765	0.283723	0.999678	0.873645	0.305215	0.999833	0.812635	0.355607	0.957323	1.40281	0.101848	0.999973
ERICH6-AS1	-0.841947	0.0150982	0.999916	-0.233533	0.49115	0.999901	-0.203191	0.548975	0.999678	-0.463944	0.173686	0.999833	0.118773	0.73433	0.991747	-0.55962	0.101894	0.999973
NFIB	0.255185	0.431738	0.999916	0.134595	0.677848	0.999901	0.104674	0.746587	0.999678	-0.290962	0.370355	0.999833	-0.149228	0.655803	0.984884	0.535175	0.1019	0.999973
JRKL	-0.199188	0.265635	0.999916	-0.102912	0.563834	0.999901	-0.111576	0.531576	0.999678	-0.231352	0.196781	0.999833	-0.361899	0.0525812	0.752608	-0.294325	0.101909	0.999973
FLNA	-0.0424327	0.859102	0.999916	0.0167648	0.94408	0.999901	-0.272162	0.257186	0.999678	-0.446689	0.0651309	0.999833	-0.550348	0.0287106	0.6877	-0.394765	0.102128	0.999973
ZNF34	0.118666	0.520013	0.999916	0.0900724	0.625095	0.999901	0.383509	0.0404942	0.999678	-0.0916351	0.619116	0.999833	0.0869355	0.648017	0.984884	-0.304175	0.102133	0.999973
MSANTD2	-0.147019	0.63718	0.999916	-0.139179	0.655213	0.999901	-0.166218	0.593959	0.999678	0.133792	0.667724	0.999833	0.285368	0.376629	0.958882	0.51433	0.102186	0.999973
KIF1C	-0.04286	0.93326	0.999916	-0.305517	0.551083	0.999901	-0.566995	0.270177	0.999678	0.348186	0.497063	0.999833	0.432775	0.414317	0.962742	0.844968	0.102268	0.999973
HDHD5-AS1	-0.260027	0.620212	0.999916	-0.174687	0.73907	0.999901	0.370863	0.480136	0.999678	-0.301027	0.566307	0.999833	-1.07775	0.0499669	0.742302	-0.86503	0.102452	0.999973
HIST1H3PS1	0.429749	0.399164	0.999916	0.144188	0.776737	0.999901	0.237485	0.640636	0.999678	-0.646759	0.206054	0.999833	-0.889222	0.093982	0.826336	-0.838487	0.102566	0.999973
MBNL1-AS1	0.142809	0.813175	0.999916	0.0578476	0.923721	0.999901	-0.0931708	0.877448	0.999678	-1.20339	0.0497345	0.999833	-0.873262	0.16497	0.885213	-0.996559	0.102569	0.999973
NXPE3	-0.156357	0.33069	0.999916	-0.0774022	0.629188	0.999901	-0.074474	0.642194	0.999678	-0.135092	0.40023	0.999833	-0.0601621	0.716309	0.989289	-0.264161	0.102589	0.999973
NECAP2	-0.0269207	0.879823	0.999916	0.0290129	0.870564	0.999901	-0.181189	0.310752	0.999678	0.0142047	0.93641	0.999833	-0.181334	0.326054	0.950277	0.293588	0.102675	0.999973
CCDC71L	-0.129012	0.779596	0.999916	-0.546473	0.238259	0.999901	-0.519316	0.262151	0.999678	0.583792	0.208054	0.999833	0.823696	0.0872235	0.825271	0.759714	0.102796	0.999973
PIDD1	0.094854	0.72333	0.999916	0.0562564	0.833648	0.999901	0.0734582	0.783922	0.999678	-0.592137	0.0299487	0.999833	-0.426049	0.127047	0.851439	-0.441299	0.102923	0.999973
TERF1	0.210543	0.140949	0.999916	0.227124	0.112727	0.999901	0.119863	0.399268	0.999678	0.108716	0.444324	0.999833	-0.0107993	0.941245	0.994789	0.233571	0.103065	0.999973
AHDC1	0.14202	0.591641	0.999916	0.0693326	0.793232	0.999901	0.184856	0.485348	0.999678	-0.00894027	0.97303	0.999833	-0.150116	0.583152	0.981723	0.43547	0.103137	0.999973
GLE1	-0.0649961	0.714246	0.999916	-0.000370589	0.998333	0.999901	-0.0977324	0.582168	0.999678	-0.258797	0.14793	0.999833	-0.030352	0.868502	0.991747	-0.292092	0.103217	0.999973
ASB1	-0.0360697	0.851718	0.999916	-0.149434	0.439681	0.999901	-0.0922132	0.632988	0.999678	-0.0545281	0.777533	0.999833	-0.29218	0.146024	0.866715	-0.317566	0.1033	0.999973
SRP14-AS1	0.12793	0.668186	0.999916	-0.209591	0.483046	0.999901	-0.0277485	0.925875	0.999678	0.037323	0.900417	0.999833	-0.22741	0.461465	0.966679	-0.490535	0.103551	0.999973
EMC3-AS1	0.715045	0.0965253	0.999916	0.43019	0.314079	0.999901	0.431666	0.312435	0.999678	-0.474104	0.26763	0.999833	-0.389968	0.376676	0.958882	-0.699889	0.103645	0.999973
PANTR1	-0.0234045	0.964431	0.999916	0.0694978	0.894661	0.999901	0.501575	0.340935	0.999678	-0.224994	0.668369	0.999833	0.592698	0.2766	0.931027	0.862447	0.103855	0.999973
AP001442.1	0.99649	0.0269189	0.999916	0.0885213	0.841231	0.999901	0.748138	0.0939571	0.999678	-0.118713	0.788231	0.999833	-0.0524719	0.908495	0.99258	0.726039	0.103859	0.999973
Z97353.1	0.106343	0.748334	0.999916	0.281592	0.396697	0.999901	-0.00685278	0.983499	0.999678	-0.555791	0.0969932	0.999833	-0.843109	0.0160517	0.605677	-0.544436	0.103866	0.999973
FGL2	0.435927	0.622058	0.999916	0.139537	0.874521	0.999901	0.148989	0.866101	0.999678	1.00242	0.258907	0.999833	0.933175	0.308606	0.945731	1.4514	0.103961	0.999973
COLEC12	-0.472099	0.654698	0.999916	-0.650151	0.538227	0.999901	-1.31349	0.215749	0.999678	1.15319	0.276459	0.999833	2.0882	0.0587984	0.772407	1.73183	0.104131	0.999973
TRIP6	-0.071863	0.862074	0.999916	-0.0922683	0.823497	0.999901	-0.152585	0.712324	0.999678	-0.263785	0.524258	0.999833	0.155751	0.71564	0.989289	-0.67908	0.104132	0.999973
ZBTB25	-0.102078	0.542187	0.999916	0.0535794	0.748773	0.999901	-0.0499948	0.765057	0.999678	-0.0562724	0.736615	0.999833	-0.1488	0.390504	0.960243	-0.274553	0.104173	0.999973
SMAD7	-0.189617	0.732641	0.999916	-0.394932	0.477432	0.999901	-0.622894	0.263873	0.999678	0.150046	0.786876	0.999833	0.993285	0.086696	0.825271	0.910689	0.104232	0.999973
TUG1	0.112037	0.596574	0.999916	-0.0168346	0.936538	0.999901	-0.101754	0.630628	0.999678	0.0183074	0.930999	0.999833	0.139452	0.523884	0.971634	0.34701	0.104265	0.999973
TLCD2	-0.0499332	0.942462	0.999916	0.0812839	0.906473	0.999901	0.161835	0.815077	0.999678	-0.545722	0.431316	0.999833	-1.49314	0.039894	0.718265	-1.13542	0.104275	0.999973
ZNF76	0.0670197	0.644674	0.999916	0.198666	0.174334	0.999901	0.030404	0.834173	0.999678	-0.0808378	0.578176	0.999833	-0.0454653	0.761935	0.991747	-0.238125	0.104545	0.999973
S100A2	-0.283163	0.724756	0.999916	0.07997	0.920753	0.999901	-0.354935	0.659042	0.999678	-1.06617	0.187675	0.999833	-0.691395	0.406379	0.962742	-1.31809	0.104569	0.999973
AC004453.1	-0.0260565	0.938244	0.999916	0.21669	0.520037	0.999901	0.603037	0.0765028	0.999678	-0.95531	0.00582816	0.755118	-1.17723	0.00115324	0.321282	-0.551283	0.104691	0.999973
STK11IP	0.149832	0.392651	0.999916	0.174294	0.320521	0.999901	0.188125	0.283924	0.999678	-0.083117	0.634696	0.999833	-0.205468	0.257583	0.926562	-0.286459	0.10475	0.999973
DDX60	-0.00684265	0.992911	0.999916	0.141056	0.854696	0.999901	-0.414628	0.590736	0.999678	-0.798374	0.301899	0.999833	-0.358584	0.652506	0.984884	-1.26203	0.104802	0.999973
IKBKE	-0.0619639	0.932731	0.999916	-0.155526	0.832239	0.999901	-0.377354	0.607579	0.999678	0.598811	0.415846	0.999833	-0.135016	0.858728	0.991747	1.20282	0.104827	0.999973
TNFRSF11B	-0.0520137	0.946706	0.999916	-0.0233685	0.976042	0.999901	-0.172149	0.824943	0.999678	-0.242071	0.755818	0.999833	-0.419118	0.602533	0.981746	-1.27499	0.104834	0.999973
LINC00630	0.283052	0.0698368	0.999916	0.474946	0.00291964	0.999901	0.402161	0.0109632	0.999678	-0.174012	0.261269	0.999833	0.12989	0.415936	0.962742	-0.25245	0.10499	0.999973
RPS3AP26	-0.192193	0.485276	0.999916	0.135502	0.622387	0.999901	0.275747	0.31768	0.999678	-0.818297	0.00395747	0.725148	-0.560296	0.0519059	0.748343	-0.449936	0.105198	0.999973
ARSJ	-0.320567	0.685363	0.999916	-0.404586	0.609244	0.999901	-0.482472	0.54233	0.999678	1.07493	0.177064	0.999833	-0.193188	0.81311	0.991747	-1.29326	0.105455	0.999973
MRPS36P1	-0.777617	0.126233	0.999916	-0.174572	0.72915	0.999901	-0.0785994	0.876067	0.999678	-0.348852	0.489581	0.999833	-1.32379	0.0130644	0.591573	-0.823868	0.105598	0.999973
NEK9	0.0926312	0.647492	0.999916	0.0720964	0.721842	0.999901	0.0978405	0.629154	0.999678	0.237352	0.243454	0.999833	0.172698	0.410181	0.962742	0.330857	0.105673	0.999973
ZNF252P-AS1	0.0263527	0.971342	0.999916	-0.452363	0.538045	0.999901	0.424777	0.563048	0.999678	0.599747	0.414792	0.999833	0.33748	0.656367	0.985058	1.19876	0.105739	0.999973
ZFP36	-0.692587	0.335889	0.999916	-0.137661	0.847792	0.999901	-0.294191	0.681828	0.999678	1.23409	0.0888292	0.999833	1.27354	0.0892052	0.826336	1.17191	0.105743	0.999973
PDPN	-0.0614612	0.910696	0.999916	0.0802355	0.883592	0.999901	-0.14817	0.786904	0.999678	-0.78461	0.155399	0.999833	0.329923	0.560575	0.979275	-0.895415	0.105753	0.999973
TMPRSS7	0.172696	0.817208	0.999916	0.170978	0.818994	0.999901	0.0699257	0.925423	0.999678	0.763534	0.308665	0.999833	2.42051	0.00248195	0.424329	1.22011	0.105918	0.999973
ZNF564	0.0425172	0.889952	0.999916	0.142033	0.644171	0.999901	0.00496425	0.98711	0.999678	0.896305	0.00469592	0.726822	0.140063	0.659313	0.985219	0.501724	0.106011	0.999973
AP001062.1	-0.508401	0.307303	0.999916	0.296464	0.550572	0.999901	0.00942758	0.984835	0.999678	-1.05821	0.0359695	0.999833	-1.09011	0.0365047	0.708731	-0.809709	0.106088	0.999973
MYO3A	0.537353	0.50229	0.999916	0.283897	0.722669	0.999901	0.339617	0.671231	0.999678	-1.33774	0.0978522	0.999833	-1.03247	0.214118	0.914811	-1.30512	0.106136	0.999973
TXLNGY	0.142279	0.352693	0.999916	0.159771	0.297072	0.999901	0.165371	0.280606	0.999678	0.126156	0.40957	0.999833	0.156773	0.321838	0.948597	-0.24899	0.106222	0.999973
NDUFV1	0.0312268	0.817273	0.999916	0.0402831	0.765687	0.999901	0.10794	0.425527	0.999678	-0.172428	0.204746	0.999833	-0.284278	0.0450057	0.732036	-0.220422	0.106349	0.999973
TROAP	0.134204	0.864686	0.999916	0.166009	0.833054	0.999901	-0.0496351	0.94974	0.999678	-0.308159	0.695714	0.999833	-0.481271	0.554693	0.979275	-1.2845	0.106358	0.999973
INPPL1	-0.0686827	0.894742	0.999916	-0.274968	0.596707	0.999901	-0.515289	0.3227	0.999678	0.237047	0.648179	0.999833	0.789133	0.144499	0.866715	0.846698	0.106381	0.999973
AC087500.1	-0.349812	0.39644	0.999916	-0.206837	0.615446	0.999901	0.109728	0.789725	0.999678	0.162418	0.693146	0.999833	-0.83584	0.0526243	0.752608	-0.670749	0.106505	0.999973
CLYBL	0.0225395	0.943378	0.999916	0.00678281	0.982947	0.999901	0.242634	0.445548	0.999678	0.476348	0.136701	0.999833	0.407405	0.216756	0.915351	0.517412	0.106523	0.999973
AC097462.3	0.340408	0.640558	0.999916	0.194561	0.789453	0.999901	0.12014	0.869013	0.999678	-1.0919	0.137238	0.999833	-0.374068	0.619512	0.982702	-1.18741	0.106601	0.999973
AC011503.2	-1.25562	0.093045	0.999916	-0.758347	0.30705	0.999901	-1.76361	0.019551	0.999678	-0.171961	0.816143	0.999833	-0.588958	0.441817	0.966679	-1.20435	0.106884	0.999973
AL161787.1	-0.0211836	0.955467	0.999916	0.362849	0.340509	0.999901	0.469225	0.218807	0.999678	-0.872621	0.0241231	0.958772	-1.06053	0.0084521	0.555746	-0.617531	0.107061	0.999973
SEC16A	0.236262	0.288518	0.999916	0.102052	0.645455	0.999901	0.12381	0.57687	0.999678	0.065437	0.767875	0.999833	0.108467	0.636023	0.982807	0.360786	0.107065	0.999973
BRWD3	0.263643	0.211171	0.999916	-0.0160929	0.938794	0.999901	0.153321	0.465356	0.999678	0.109625	0.601308	0.999833	0.208153	0.338135	0.955627	0.341116	0.10712	0.999973
CCDC62	-0.0667211	0.905932	0.999916	0.316085	0.57604	0.999901	0.559286	0.323701	0.999678	0.353411	0.531957	0.999833	0.761612	0.194591	0.903971	0.918884	0.107137	0.999973
VWA1	-0.392626	0.719464	0.999916	-0.760819	0.487028	0.999901	-1.66636	0.13062	0.999678	0.687309	0.529936	0.999833	1.318	0.245463	0.922116	1.77808	0.107168	0.999973
HFE	-0.00919935	0.987336	0.999916	0.320666	0.58052	0.999901	0.643137	0.269405	0.999678	-0.383038	0.509392	0.999833	-1.33137	0.02908	0.691798	-0.942935	0.107263	0.999973
AL391069.2	0.278009	0.371321	0.999916	0.201896	0.515568	0.999901	-0.035587	0.908613	0.999678	-0.0768237	0.804326	0.999833	0.0644703	0.840505	0.991747	-0.504259	0.107337	0.999973
SGSH	0.00426102	0.983362	0.999916	0.0418029	0.837913	0.999901	0.0177715	0.93069	0.999678	-0.319028	0.121872	0.999833	-0.323288	0.129075	0.851439	-0.332301	0.107383	0.999973
IL13RA2	0.0233587	0.980447	0.999916	0.0643684	0.946154	0.999901	-0.0594348	0.950275	0.999678	-0.60228	0.528061	0.999833	-1.02747	0.298777	0.940196	-1.54975	0.107449	0.999973
ITGB5	-0.0577262	0.933421	0.999916	-0.365951	0.596776	0.999901	-0.585695	0.397948	0.999678	-0.137756	0.842001	0.999833	-0.660819	0.356233	0.957323	1.1234	0.107503	0.999973
RNF103	-0.205855	0.632046	0.999916	-0.39874	0.354824	0.999901	-0.579062	0.180628	0.999678	0.151574	0.724293	0.999833	0.698385	0.119015	0.850181	0.698309	0.107504	0.999973
ACOX1	0.0243908	0.880883	0.999916	-0.0440622	0.786658	0.999901	0.104593	0.52112	0.999678	0.0482294	0.767052	0.999833	-0.232356	0.170157	0.888783	-0.264558	0.107567	0.999973
AL136040.1	0.0984671	0.79432	0.999916	0.578214	0.129104	0.999901	0.407981	0.282096	0.999678	-0.892662	0.0206066	0.958772	-0.395599	0.312499	0.946367	-0.613688	0.107625	0.999973
TATDN1P1	0.307267	0.387432	0.999916	0.870428	0.0163591	0.999901	0.880549	0.0152037	0.999678	-0.569121	0.111885	0.999833	-0.678115	0.0676184	0.786126	-0.575935	0.10774	0.999973
GRAMD2A	-0.503556	0.603824	0.999916	0.250577	0.796083	0.999901	-0.155687	0.87242	0.999678	-0.221902	0.818978	0.999833	-0.293179	0.769817	0.991747	-1.57498	0.107742	0.999973
LINC00470	0.667824	0.359626	0.999916	0.96826	0.185672	0.999901	0.741386	0.309525	0.999678	0.368521	0.612395	0.999833	0.640868	0.394646	0.960447	1.1805	0.107759	0.999973
TWNK	-0.231841	0.233919	0.999916	-0.153943	0.427892	0.999901	-0.0928935	0.631838	0.999678	-0.152096	0.433429	0.999833	-0.27534	0.171993	0.890224	-0.314665	0.107788	0.999973
SLC51A	0.17396	0.721766	0.999916	-0.110983	0.820228	0.999901	-0.0335554	0.945212	0.999678	-0.506786	0.301315	0.999833	-0.0786566	0.876113	0.991747	-0.792796	0.10796	0.999973
ARID4A	0.103235	0.487032	0.999916	0.154442	0.299552	0.999901	0.254776	0.0892617	0.999678	0.243567	0.10393	0.999833	0.102656	0.503488	0.96826	0.240636	0.108075	0.999973
UCK1	0.149091	0.276108	0.999916	0.140936	0.302994	0.999901	0.0631898	0.643118	0.999678	-0.236848	0.0857426	0.999833	-0.100624	0.475659	0.966679	-0.221169	0.108083	0.999973
AC067904.2	-0.203105	0.473294	0.999916	-0.348816	0.21987	0.999901	0.193609	0.494149	0.999678	-0.704811	0.014835	0.901248	-0.364628	0.21457	0.914811	-0.458765	0.108091	0.999973
MRPL2	-0.139246	0.341085	0.999916	0.0144946	0.920785	0.999901	-0.023941	0.869539	0.999678	-0.150521	0.303714	0.999833	-0.419523	0.00678736	0.520399	-0.236529	0.108134	0.999973
TAF5	0.00154171	0.995504	0.999916	0.0300214	0.912621	0.999901	0.100783	0.71272	0.999678	0.129241	0.636916	0.999833	0.123835	0.661542	0.985388	0.443927	0.108164	0.999973
AL450124.1	0.214653	0.761736	0.999916	0.231356	0.743837	0.999901	0.130213	0.854037	0.999678	0.103553	0.883676	0.999833	-0.023291	0.974589	0.997807	-1.14823	0.108214	0.999973
ZNRF2	0.278588	0.581166	0.999916	-0.21678	0.667571	0.999901	-0.64512	0.20372	0.999678	0.421419	0.404696	0.999833	0.662839	0.206215	0.911844	0.818231	0.108264	0.999973
AC010468.1	0.379835	0.339419	0.999916	0.621622	0.120112	0.999901	0.65678	0.100912	0.999678	-0.998534	0.0138417	0.901248	-0.817687	0.0491143	0.742302	-0.642623	0.108319	0.999973
ZNF517	0.00577397	0.982613	0.999916	-0.0112711	0.966066	0.999901	0.431115	0.107204	0.999678	0.166029	0.531498	0.999833	-0.0246968	0.928114	0.993857	-0.42963	0.108394	0.999973
DYNLL1P2	-0.0215358	0.962103	0.999916	-0.283206	0.532693	0.999901	0.0753976	0.867895	0.999678	-1.0412	0.0243096	0.958772	-0.997265	0.036306	0.708731	-0.734953	0.108413	0.999973
TMEM63A	0.02406	0.976876	0.999916	-0.109321	0.895227	0.999901	-0.0880081	0.915566	0.999678	-1.43727	0.0869203	0.999833	-0.424567	0.620901	0.982702	-1.34554	0.108529	0.999973
PTMAP5	-0.0430927	0.900632	0.999916	0.0426749	0.90159	0.999901	0.401024	0.247665	0.999678	-0.673121	0.0545262	0.999833	-0.983581	0.00731889	0.54595	-0.559262	0.108617	0.999973
CBR3	0.448383	0.485597	0.999916	0.258296	0.687528	0.999901	-0.241336	0.707042	0.999678	-0.894202	0.166671	0.999833	-0.911758	0.172232	0.890224	-1.04002	0.108634	0.999973
MCF2L-AS1	-0.300268	0.428095	0.999916	0.00816439	0.982767	0.999901	-0.448919	0.237506	0.999678	-0.890142	0.0210793	0.958772	-0.49608	0.206803	0.911926	-0.612446	0.10868	0.999973
AC117503.5	-0.984529	0.0584506	0.999916	-0.730999	0.157445	0.999901	-0.0114469	0.9822	0.999678	0.0601101	0.906741	0.999833	0.576559	0.278954	0.931316	0.831297	0.108694	0.999973
FAAH2	-0.238278	0.562325	0.999916	-0.00265766	0.994837	0.999901	0.232387	0.572004	0.999678	0.677861	0.10239	0.999833	0.577939	0.176293	0.895956	0.665142	0.10886	0.999973
SPTLC2	0.0724872	0.616741	0.999916	0.198173	0.173902	0.999901	0.137425	0.34392	0.999678	-0.143616	0.322775	0.999833	-0.146103	0.330216	0.953273	-0.23427	0.108948	0.999973
CAV1	-0.411535	0.467318	0.999916	-0.224912	0.690771	0.999901	-0.314536	0.578208	0.999678	0.205907	0.715686	0.999833	-0.933142	0.113444	0.846662	-0.914292	0.109143	0.999973
POLR2L	-0.00724887	0.97285	0.999916	0.0271558	0.898552	0.999901	-0.0406641	0.848609	0.999678	-0.306446	0.153454	0.999833	-0.405802	0.0686996	0.788671	-0.34461	0.109178	0.999973
MRPL24	-0.00480145	0.97443	0.999916	0.00711829	0.962099	0.999901	0.101673	0.498065	0.999678	-0.149609	0.319776	0.999833	-0.177383	0.254151	0.925991	-0.242291	0.109284	0.999973
TOLLIP	-0.178869	0.171255	0.999916	0.0230779	0.858887	0.999901	0.028757	0.824681	0.999678	-0.226454	0.0845769	0.999833	-0.359428	0.00905726	0.560684	-0.209922	0.109294	0.999973
MTCO3P12	0.271282	0.220547	0.999916	0.0352955	0.87264	0.999901	0.147947	0.50232	0.999678	-0.26744	0.227077	0.999833	-0.434423	0.059615	0.774126	-0.355979	0.109395	0.999973
MED27	0.0865694	0.481733	0.999916	0.131553	0.286236	0.999901	0.0980087	0.426002	0.999678	-0.129929	0.292174	0.999833	-0.161253	0.206623	0.911844	-0.198545	0.109471	0.999973
SBF2-AS1	0.0209933	0.957487	0.999916	0.155766	0.692627	0.999901	0.788049	0.0487221	0.999678	-0.395262	0.31741	0.999833	-0.747104	0.069865	0.792608	-0.636494	0.10955	0.999973
AL020996.1	0.52117	0.274016	0.999916	0.208098	0.661042	0.999901	-0.198015	0.67649	0.999678	0.331675	0.48514	0.999833	0.814573	0.0999671	0.833453	0.766448	0.109568	0.999973
LINC00115	0.0954691	0.850167	0.999916	0.0867633	0.863686	0.999901	-0.135453	0.788711	0.999678	-0.568192	0.263144	0.999833	-0.290771	0.578028	0.981723	-0.816583	0.109599	0.999973
PTCD1	0.00832475	0.978233	0.999916	0.185377	0.544054	0.999901	-0.00933781	0.975585	0.999678	0.472697	0.12476	0.999833	0.847606	0.00885555	0.555746	0.492986	0.10966	0.999973
MREG	-0.310788	0.693993	0.999916	-0.709146	0.370525	0.999901	-0.822848	0.299289	0.999678	0.366775	0.642498	0.999833	0.567135	0.487679	0.966679	1.27492	0.109826	0.999973
OXCT1-AS1	-0.491315	0.20544	0.999916	0.103724	0.788	0.999901	0.17252	0.654842	0.999678	-0.445699	0.250184	0.999833	-0.159002	0.690014	0.987662	-0.622462	0.109986	0.999973
NBPF14	0.195305	0.716421	0.999916	-0.00156284	0.99768	0.999901	0.105086	0.844986	0.999678	-0.919639	0.0905816	0.999833	0.460757	0.407879	0.962742	0.867383	0.110019	0.999973
LINC02200	0.349713	0.707663	0.999916	0.0447389	0.961717	0.999901	0.0192295	0.98354	0.999678	-0.683053	0.464585	0.999833	-1.00389	0.29923	0.941097	-1.50441	0.110021	0.999973
NDUFAF7	0.131824	0.401252	0.999916	0.147646	0.347481	0.999901	0.0225711	0.885419	0.999678	0.181742	0.248328	0.999833	-0.155093	0.339559	0.955852	0.252725	0.110112	0.999973
MUC12	-0.779199	0.153642	0.999916	-0.424185	0.434778	0.999901	-0.58991	0.278451	0.999678	-0.0399369	0.941243	0.999833	-0.0689385	0.901997	0.992475	0.874062	0.110205	0.999973
AC012512.1	0.00772035	0.992636	0.999916	-1.03628	0.218129	0.999901	-0.221969	0.790797	0.999678	0.429564	0.60796	0.999833	1.38609	0.112273	0.846105	1.34879	0.110384	0.999973
PSMD6-AS2	0.388579	0.356627	0.999916	0.665854	0.116489	0.999901	0.947775	0.0268905	0.999678	0.250117	0.552186	0.999833	0.49943	0.252356	0.925991	0.677439	0.110385	0.999973
CFAP44	0.267789	0.692815	0.999916	0.261771	0.699371	0.999901	0.165977	0.806505	0.999678	0.981679	0.150593	0.999833	0.153894	0.826015	0.991747	-1.09226	0.110408	0.999973
H3F3AP4	-0.0909568	0.748159	0.999916	-0.094914	0.737607	0.999901	-0.132904	0.639124	0.999678	0.379857	0.182804	0.999833	0.408235	0.166083	0.885213	0.456474	0.110476	0.999973
SNRPEP2	0.161932	0.590677	0.999916	0.296289	0.326323	0.999901	0.062695	0.834886	0.999678	-0.710213	0.0207328	0.958772	-0.594217	0.0592845	0.774126	-0.484552	0.11063	0.999973
CKAP2	0.0958236	0.628032	0.999916	0.00394816	0.984059	0.999901	-0.132468	0.503351	0.999678	0.223747	0.259844	0.999833	0.283932	0.167444	0.886873	0.318359	0.110652	0.999973
NDUFB1P1	0.279534	0.640449	0.999916	-0.150861	0.800867	0.999901	-0.397636	0.506796	0.999678	-0.610453	0.309259	0.999833	-0.861876	0.166163	0.885213	-0.963158	0.110748	0.999973
AC005000.1	0.0277076	0.923295	0.999916	0.291815	0.312456	0.999901	0.32126	0.266535	0.999678	-0.254541	0.377834	0.999833	-0.464396	0.121748	0.851276	-0.463429	0.110797	0.999973
CALM2P2	-0.00697964	0.974827	0.999916	0.128764	0.560982	0.999901	0.232206	0.295854	0.999678	-0.379544	0.0897318	0.999833	-0.565851	0.0155202	0.601382	-0.356206	0.110808	0.999973
EFNB2	-0.0322842	0.935383	0.999916	-0.238156	0.550335	0.999901	-0.350587	0.380048	0.999678	0.414532	0.299882	0.999833	0.608592	0.142398	0.864407	0.641042	0.11093	0.999973
AC246787.1	0.170586	0.606023	0.999916	-0.133035	0.6874	0.999901	0.502805	0.131461	0.999678	-0.714557	0.0335942	0.999833	-1.04464	0.00310714	0.445875	-0.531883	0.110948	0.999973
LINC00882	0.0220863	0.927546	0.999916	0.277537	0.25555	0.999901	0.314929	0.197638	0.999678	-0.116507	0.631751	0.999833	0.149345	0.552303	0.978361	-0.390981	0.110949	0.999973
XPNPEP3	0.0545138	0.742757	0.999916	0.105725	0.524909	0.999901	0.00610777	0.970654	0.999678	-0.169656	0.308795	0.999833	-0.215093	0.21264	0.914811	-0.267106	0.11116	0.999973
AC083899.1	0.155328	0.678272	0.999916	-0.534441	0.156443	0.999901	-0.0404798	0.913858	0.999678	0.149119	0.690438	0.999833	-0.278582	0.472073	0.966679	-0.601983	0.111172	0.999973
IL15	0.0979313	0.893182	0.999916	0.0321453	0.964842	0.999901	-0.244711	0.737313	0.999678	0.0706679	0.922806	0.999833	-0.83224	0.271613	0.931027	-1.17317	0.111181	0.999973
HNRNPL	-0.179446	0.588992	0.999916	-0.148382	0.654929	0.999901	-0.385433	0.247759	0.999678	-0.0427342	0.897511	0.999833	0.417387	0.225977	0.91692	0.533567	0.111259	0.999973
HINFP	-0.226952	0.105035	0.999916	-0.0419798	0.762044	0.999901	0.0598553	0.666051	0.999678	-0.196033	0.160412	0.999833	-0.117482	0.413178	0.962742	-0.22265	0.111655	0.999973
PGGT1B	0.0186728	0.941443	0.999916	-0.0972795	0.70211	0.999901	0.0437387	0.863402	0.999678	0.189526	0.456888	0.999833	0.457181	0.0852937	0.821871	0.408323	0.111703	0.999973
FGFR1OP2	0.0752493	0.553505	0.999916	0.042961	0.734921	0.999901	0.146185	0.251481	0.999678	-0.0601517	0.635593	0.999833	-0.12763	0.331831	0.954062	-0.203686	0.111767	0.999973
ZNF354B	0.144354	0.484461	0.999916	0.0147764	0.94284	0.999901	0.0758296	0.713048	0.999678	-0.12664	0.539468	0.999833	0.192202	0.368206	0.958607	-0.330934	0.111807	0.999973
ZNF222	-0.00568384	0.974954	0.999916	-0.0491604	0.78603	0.999901	-0.208296	0.252324	0.999678	0.358376	0.0511244	0.999833	0.217852	0.246615	0.922116	0.290709	0.111818	0.999973
GABRA4	-0.795124	0.531559	0.999916	-0.0698637	0.956096	0.999901	-0.432833	0.733156	0.999678	0.799648	0.529233	0.999833	-0.058977	0.964122	0.996416	2.0376	0.111841	0.999973
TSPAN10	-0.188498	0.845541	0.999916	-0.0335699	0.97232	0.999901	-0.688817	0.477333	0.999678	0.595928	0.538506	0.999833	-0.829057	0.40812	0.962742	-1.55304	0.111927	0.999973
FOXM1	0.255249	0.696152	0.999916	0.0623501	0.923961	0.999901	-0.212077	0.745538	0.999678	-1.35859	0.0407422	0.999833	-0.548242	0.417803	0.962742	-1.04812	0.112096	0.999973
ZNF43	0.162788	0.277756	0.999916	0.112464	0.452274	0.999901	0.0538665	0.718388	0.999678	0.199165	0.185194	0.999833	0.250252	0.108251	0.843858	0.239533	0.112126	0.999973
PRR5L	-0.046337	0.950082	0.999916	0.118033	0.873311	0.999901	0.0878624	0.905512	0.999678	-2.0297	0.00765307	0.769848	-0.78606	0.305973	0.944402	-1.18731	0.112179	0.999973
AL583856.1	-0.361611	0.317307	0.999916	-0.0285987	0.93672	0.999901	0.299493	0.406974	0.999678	-0.718915	0.0492979	0.999833	-0.79444	0.0358798	0.708731	-0.577805	0.11219	0.999973
ELOCP2	-0.381135	0.307353	0.999916	0.0420513	0.90997	0.999901	0.0364474	0.921925	0.999678	-0.536011	0.152716	0.999833	-0.320629	0.405259	0.961907	-0.596228	0.112353	0.999973
TRMU	0.118358	0.331778	0.999916	0.0353884	0.770933	0.999901	0.0476183	0.695302	0.999678	-0.200419	0.102584	0.999833	-0.382873	0.00320187	0.45181	-0.194784	0.112411	0.999973
CMC1	-0.270815	0.219776	0.999916	-0.0129463	0.952947	0.999901	-0.0246259	0.910637	0.999678	0.290732	0.188103	0.999833	0.0759921	0.737566	0.991747	0.351677	0.112456	0.999973
CENPJ	0.209326	0.288805	0.999916	0.221297	0.262358	0.999901	0.242309	0.220167	0.999678	0.0782902	0.690466	0.999833	-0.272236	0.182915	0.897409	-0.31488	0.112512	0.999973
UTP23	-0.0762792	0.623882	0.999916	0.246412	0.116325	0.999901	0.254584	0.104924	0.999678	0.0385884	0.803952	0.999833	-0.000859686	0.995728	0.99984	0.249008	0.1126	0.999973
PHTF1	0.103499	0.560981	0.999916	-0.0304573	0.863994	0.999901	-0.0209989	0.905984	0.999678	0.0843927	0.63531	0.999833	0.184946	0.315911	0.946626	0.284788	0.112686	0.999973
MSL1	0.0762082	0.674711	0.999916	0.0219291	0.903815	0.999901	0.191796	0.292597	0.999678	0.0728655	0.688195	0.999833	0.117866	0.530192	0.972212	0.290649	0.112705	0.999973
COG4	0.118508	0.471959	0.999916	0.109367	0.506685	0.999901	0.0407401	0.804357	0.999678	-0.0449196	0.784768	0.999833	-0.0141855	0.933456	0.994658	-0.263365	0.11271	0.999973
PRKAA2	-0.115741	0.457648	0.999916	-0.0619999	0.690284	0.999901	0.0550863	0.723277	0.999678	-0.167038	0.284869	0.999833	-0.235358	0.14624	0.866715	-0.248983	0.112829	0.999973
NME2	-0.0179637	0.936876	0.999916	-0.0110709	0.961071	0.999901	0.0638132	0.778513	0.999678	0.258058	0.257596	0.999833	0.281788	0.231787	0.91692	0.363165	0.112839	0.999973
PCLAF	0.117677	0.803423	0.999916	-0.00691824	0.988321	0.999901	-0.329968	0.485908	0.999678	-0.842773	0.0781161	0.999833	-0.362304	0.45909	0.966679	-0.756449	0.112982	0.999973
RPL3P4	-0.14181	0.615827	0.999916	-0.28188	0.319962	0.999901	0.0838485	0.766563	0.999678	-0.43348	0.128124	0.999833	-0.580586	0.0499213	0.742302	-0.451801	0.113049	0.999973
SSR4	0.0179836	0.916552	0.999916	0.0730946	0.670407	0.999901	0.142778	0.406719	0.999678	-0.197973	0.251129	0.999833	-0.295403	0.0992831	0.831319	-0.274614	0.113079	0.999973
TP53TG1	-0.0466719	0.864097	0.999916	0.0904651	0.740145	0.999901	0.0486687	0.858344	0.999678	0.228972	0.402296	0.999833	0.191588	0.497207	0.967231	0.436235	0.113091	0.999973
B4GALT7	-0.0988063	0.558246	0.999916	-0.00472756	0.977623	0.999901	-0.0665918	0.692948	0.999678	-0.265265	0.118988	0.999833	-0.059274	0.73369	0.991747	-0.269666	0.1131	0.999973
TGFBR2	-0.151169	0.827004	0.999916	-0.132848	0.84769	0.999901	-0.689338	0.320733	0.999678	-0.302286	0.662276	0.999833	0.0372333	0.958443	0.995416	-1.10644	0.113119	0.999973
CACNG7	-0.443045	0.203346	0.999916	-0.538492	0.123179	0.999901	-0.154521	0.655513	0.999678	-0.00508122	0.988286	0.999833	0.406335	0.258195	0.926562	0.553444	0.113294	0.999973
AGER	0.592519	0.187978	0.999916	-0.132583	0.766856	0.999901	0.0419757	0.92519	0.999678	-0.112363	0.801585	0.999833	0.681383	0.143454	0.865661	0.714618	0.113396	0.999973
CLP1	0.0441662	0.723162	0.999916	0.0380614	0.760129	0.999901	-0.0240319	0.847104	0.999678	0.0265037	0.831608	0.999833	0.0132769	0.917875	0.992977	-0.199204	0.113423	0.999973
FBLN2	-0.0625263	0.920333	0.999916	0.0163287	0.979162	0.999901	-0.173123	0.781896	0.999678	-0.0173103	0.97791	0.999833	-0.737254	0.256076	0.926562	-0.99917	0.113468	0.999973
LINC01011	0.156282	0.651837	0.999916	0.348424	0.315943	0.999901	0.250672	0.46978	0.999678	0.36654	0.291638	0.999833	0.412456	0.251143	0.924729	0.552976	0.113578	0.999973
CAP1P2	-0.35683	0.309461	0.999916	-0.0261538	0.940381	0.999901	-0.278283	0.42727	0.999678	-0.507859	0.149678	0.999833	-0.830575	0.0242115	0.659009	-0.55867	0.113611	0.999973
FTH1P8	-0.289164	0.413533	0.999916	-0.0487361	0.890112	0.999901	0.161806	0.64669	0.999678	-0.769127	0.0322012	0.999833	-0.963259	0.0100093	0.561977	-0.563493	0.113628	0.999973
PDE3A	0.108637	0.85653	0.999916	0.150805	0.801861	0.999901	-0.00650224	0.991365	0.999678	-0.590808	0.327241	0.999833	-0.730459	0.241817	0.920326	-0.959842	0.113629	0.999973
ELF1	0.0180498	0.942912	0.999916	0.139522	0.580335	0.999901	-0.0244027	0.922874	0.999678	-0.155862	0.536928	0.999833	-0.532527	0.044131	0.729064	-0.402385	0.113876	0.999973
NBPF11	0.0893707	0.793142	0.999916	-0.0375009	0.912362	0.999901	-0.00670097	0.984309	0.999678	0.488711	0.154702	0.999833	0.430926	0.22357	0.91692	0.543834	0.113943	0.999973
MICA	-0.343135	0.620912	0.999916	-0.128653	0.852776	0.999901	-0.179	0.796277	0.999678	1.21372	0.0835078	0.999833	-0.85461	0.235318	0.91692	1.10631	0.113972	0.999973
AC090825.1	0.593691	0.283525	0.999916	0.202293	0.713721	0.999901	0.558943	0.312411	0.999678	-1.10143	0.0490033	0.999833	0.0549104	0.923181	0.993428	-0.879471	0.114027	0.999973
MAP3K8	0.0519197	0.916953	0.999916	0.284565	0.568132	0.999901	0.284544	0.568161	0.999678	0.394955	0.428761	0.999833	-0.0469434	0.927295	0.993857	0.794454	0.114066	0.999973
DAPK3	-0.127905	0.417734	0.999916	-0.0549988	0.726957	0.999901	-0.279514	0.0793832	0.999678	-0.375209	0.019641	0.958772	-0.420233	0.0117323	0.584301	-0.251184	0.114094	0.999973
SLC10A7	0.266244	0.0972337	0.999916	0.173801	0.276059	0.999901	0.264931	0.0988597	0.999678	0.224013	0.16161	0.999833	0.322896	0.0525037	0.752608	0.253364	0.114163	0.999973
BEST3	0.106621	0.892168	0.999916	0.0252095	0.974429	0.999901	-0.104762	0.894037	0.999678	0.665024	0.399084	0.999833	-0.0130265	0.98721	0.999791	1.25381	0.11437	0.999973
CCNY	-0.147595	0.585228	0.999916	-0.186021	0.491838	0.999901	-0.18845	0.486221	0.999678	0.135333	0.616711	0.999833	0.226228	0.418791	0.962821	0.430624	0.114384	0.999973
AL513175.1	0.171137	0.645402	0.999916	-0.29578	0.427188	0.999901	0.0354012	0.924106	0.999678	0.170283	0.647048	0.999833	-0.0781759	0.838682	0.991747	-0.592075	0.114578	0.999973
BMF	0.617296	0.327085	0.999916	0.309499	0.622208	0.999901	0.456073	0.468285	0.999678	-0.508416	0.419026	0.999833	0.298198	0.645855	0.984884	0.999561	0.114689	0.999973
TRIM66	0.43759	0.226018	0.999916	0.220789	0.53958	0.999901	0.399206	0.268931	0.999678	-0.657602	0.070814	0.999833	-0.504019	0.177722	0.895956	-0.572365	0.114734	0.999973
PCDHGA10	-0.113019	0.690692	0.999916	0.0590798	0.83515	0.999901	-0.0037299	0.989516	0.999678	-0.40671	0.155139	0.999833	-0.503509	0.0895685	0.826336	-0.452015	0.114772	0.999973
LSM1	-0.0145967	0.909603	0.999916	0.014828	0.908177	0.999901	0.0402346	0.754387	0.999678	0.286807	0.0285468	0.994617	0.100254	0.45137	0.966679	0.204682	0.114825	0.999973
RPL21P28	0.0920599	0.718465	0.999916	0.0690475	0.786811	0.999901	0.138173	0.58868	0.999678	-0.322441	0.209254	0.999833	-0.389555	0.142934	0.865354	-0.406292	0.114899	0.999973
AL133520.1	0.188807	0.628112	0.999916	0.249645	0.522153	0.999901	0.149238	0.701719	0.999678	-0.209363	0.591261	0.999833	0.232673	0.563592	0.979275	-0.619741	0.115004	0.999973
NFE2L3	0.00907787	0.989185	0.999916	-0.375918	0.575056	0.999901	-0.325669	0.627088	0.999678	0.581529	0.386605	0.999833	1.12312	0.108081	0.843858	1.06502	0.115263	0.999973
EXTL2	0.0415799	0.748945	0.999916	0.106868	0.411806	0.999901	0.0315145	0.808315	0.999678	0.189662	0.147478	0.999833	0.121556	0.36652	0.958022	0.206495	0.115323	0.999973
FAM189A2	-0.307487	0.615917	0.999916	0.235171	0.701111	0.999901	-0.270322	0.659133	0.999678	1.12347	0.0700833	0.999833	0.252803	0.689659	0.987662	0.973331	0.115435	0.999973
RPSAP19	-0.361986	0.318656	0.999916	-0.246967	0.495389	0.999901	-0.36053	0.320591	0.999678	-0.613469	0.0933325	0.999833	-0.89558	0.0189675	0.608198	-0.574532	0.115568	0.999973
DEPDC1B	0.229244	0.433418	0.999916	0.0501768	0.863556	0.999901	-0.105342	0.718365	0.999678	-0.101921	0.727132	0.999833	-0.271234	0.370045	0.958608	-0.463696	0.115702	0.999973
AC010857.1	0.165684	0.83379	0.999916	0.291409	0.712169	0.999901	0.410027	0.603862	0.999678	1.01012	0.203536	0.999833	1.54022	0.0624638	0.781405	1.25381	0.115712	0.999973
UBL7-AS1	0.491214	0.0709995	0.999916	-0.0884998	0.741928	0.999901	0.0422565	0.875021	0.999678	0.0588286	0.82669	0.999833	0.252952	0.363651	0.958022	0.42665	0.115721	0.999973
KRT10	-0.254564	0.536981	0.999916	-0.39732	0.336265	0.999901	-0.479725	0.246409	0.999678	0.28504	0.489542	0.999833	0.403308	0.344757	0.956785	0.653817	0.115761	0.999973
ACADL	0.0340523	0.970579	0.999916	0.215046	0.815864	0.999901	0.468982	0.61184	0.999678	-0.593928	0.520707	0.999833	0.0878069	0.926663	0.993857	-1.46522	0.115995	0.999973
COQ6	0.0724765	0.636197	0.999916	0.227793	0.14009	0.999901	0.248625	0.107872	0.999678	-0.157702	0.304918	0.999833	-0.225403	0.157353	0.872698	-0.242859	0.116124	0.999973
SLC24A1	0.186372	0.682839	0.999916	-0.122078	0.788903	0.999901	0.0504616	0.911858	0.999678	0.494135	0.280531	0.999833	0.208508	0.658215	0.985219	-0.72273	0.11633	0.999973
KCTD5	-0.0184688	0.868222	0.999916	0.0108025	0.922684	0.999901	0.0515653	0.64343	0.999678	-0.176649	0.115964	0.999833	-0.195508	0.0926664	0.826336	-0.176414	0.116442	0.999973
AL353747.2	-0.0294955	0.972396	0.999916	-0.0421668	0.960546	0.999901	0.186938	0.826441	0.999678	1.29901	0.130918	0.999833	1.80659	0.0434898	0.727673	1.35089	0.116484	0.999973
AC024060.1	0.512843	0.0944757	0.999916	0.438338	0.15173	0.999901	0.590001	0.0552077	0.999678	-0.382146	0.210547	0.999833	-0.114379	0.715312	0.989289	-0.480724	0.116519	0.999973
RNPC3	0.495891	0.00882004	0.999916	0.167689	0.364513	0.999901	0.386316	0.0392744	0.999678	0.116046	0.529629	0.999833	0.21378	0.26398	0.927115	0.292108	0.116521	0.999973
HMCES	0.022764	0.872221	0.999916	-0.079928	0.572696	0.999901	-0.069639	0.62299	0.999678	-0.287329	0.0456152	0.999833	-0.166997	0.255798	0.926562	-0.224228	0.116572	0.999973
RARS	-0.0513001	0.69369	0.999916	-0.0230147	0.859682	0.999901	-0.0670008	0.607129	0.999678	0.242231	0.0662762	0.999833	0.333682	0.0153236	0.600903	0.206245	0.116582	0.999973
ZNF410	0.119606	0.697956	0.999916	0.136593	0.657681	0.999901	0.141327	0.646627	0.999678	0.0895555	0.771318	0.999833	0.549477	0.0878051	0.825271	0.487978	0.116614	0.999973
DHFR	0.0619232	0.853836	0.999916	-0.0314996	0.925329	0.999901	-0.258136	0.443482	0.999678	0.29338	0.384093	0.999833	0.166345	0.63221	0.982702	0.532431	0.116617	0.999973
NANOS1	-0.455902	0.490865	0.999916	-0.639582	0.334651	0.999901	-0.284011	0.667439	0.999678	0.476649	0.471425	0.999833	0.832978	0.224911	0.91692	1.04578	0.116842	0.999973
ARID2	0.0520208	0.701147	0.999916	0.0430133	0.750957	0.999901	-0.019926	0.883075	0.999678	-0.0290861	0.830032	0.999833	-0.198527	0.159295	0.874521	-0.214449	0.116906	0.999973
KIF20B	-0.0191495	0.942311	0.999916	0.0390727	0.882623	0.999901	-0.0750497	0.776772	0.999678	-0.199096	0.452804	0.999833	-0.522243	0.0595755	0.774126	0.41873	0.117032	0.999973
RIPOR3	0.150522	0.743821	0.999916	0.279415	0.544497	0.999901	-0.121365	0.792138	0.999678	-0.528478	0.25343	0.999833	-1.09284	0.0243013	0.659009	-0.728043	0.117279	0.999973
COX16	0.0718871	0.676244	0.999916	-0.0296159	0.863331	0.999901	0.0313457	0.855435	0.999678	0.13519	0.433051	0.999833	0.154767	0.385288	0.958882	0.272016	0.117301	0.999973
ZNF525	0.407495	0.0829634	0.999916	0.0987972	0.67084	0.999901	0.022452	0.923008	0.999678	0.396256	0.0916068	0.999833	0.572874	0.0194674	0.611455	0.367228	0.117394	0.999973
RPS26P31	0.196693	0.699156	0.999916	-0.127299	0.802433	0.999901	0.41404	0.416853	0.999678	-0.900949	0.0800819	0.999833	-1.07333	0.0443938	0.729064	-0.803936	0.117468	0.999973
AARSD1	0.0521648	0.931766	0.999916	0.135442	0.824096	0.999901	0.526596	0.388746	0.999678	-0.639902	0.295599	0.999833	0.363299	0.564327	0.979275	-0.962761	0.117503	0.999973
UBE2SP2	-0.118629	0.750478	0.999916	-0.523132	0.163808	0.999901	-0.349	0.350937	0.999678	-0.990358	0.00967386	0.823153	-0.989616	0.0122001	0.591573	-0.589279	0.11751	0.999973
AC011370.1	1.03657	0.241905	0.999916	0.384682	0.662632	0.999901	0.709762	0.421659	0.999678	1.79844	0.0445036	0.999833	1.49483	0.104105	0.838141	1.39155	0.117721	0.999973
LGR5	-0.488073	0.617208	0.999916	-0.964777	0.324517	0.999901	-0.789782	0.41937	0.999678	-0.198662	0.838663	0.999833	-1.63418	0.108473	0.844816	-1.5406	0.117764	0.999973
GID4	-0.15085	0.482165	0.999916	-0.205469	0.339204	0.999901	0.00507329	0.981106	0.999678	0.164661	0.443145	0.999833	0.376971	0.0920947	0.826336	0.338266	0.117797	0.999973
EGLN2	0.233651	0.557345	0.999916	0.283868	0.476184	0.999901	0.144634	0.716208	0.999678	-0.00377514	0.992425	0.999833	-0.236852	0.564794	0.979275	-0.627816	0.117852	0.999973
SLC32A1	0.00668648	0.995001	0.999916	-0.101115	0.924523	0.999901	0.202139	0.849802	0.999678	-0.777436	0.467264	0.999833	0.293651	0.790067	0.991747	1.6845	0.117963	0.999973
GBP2	-0.168494	0.790636	0.999916	-0.300452	0.636127	0.999901	-0.918517	0.150978	0.999678	0.303341	0.63289	0.999833	-0.193505	0.767938	0.991747	1.00093	0.118142	0.999973
AC012078.2	0.0308569	0.967301	0.999916	0.0801856	0.915167	0.999901	-0.375143	0.618549	0.999678	-1.74809	0.0228511	0.958772	-0.138213	0.858962	0.991747	-1.18741	0.118146	0.999973
GACAT2	0.255941	0.737931	0.999916	-0.23042	0.763219	0.999901	0.208047	0.785605	0.999678	-1.852	0.0178047	0.935263	-0.0921587	0.907136	0.992475	-1.20613	0.118155	0.999973
SELENOP	0.061944	0.942735	0.999916	0.0250287	0.976845	0.999901	-0.108826	0.899577	0.999678	0.270284	0.754037	0.999833	1.05698	0.238019	0.918815	1.35974	0.118296	0.999973
RARRES2	-0.105796	0.864624	0.999916	0.22445	0.71768	0.999901	0.0149614	0.980762	0.999678	0.473177	0.446713	0.999833	0.857548	0.184001	0.89916	0.97825	0.118346	0.999973
LINC02595	0.0566878	0.8973	0.999916	0.126755	0.772938	0.999901	0.356231	0.41846	0.999678	-0.11188	0.798961	0.999833	0.330579	0.467193	0.966679	0.6924	0.118349	0.999973
AC096992.2	0.741848	0.123112	0.999916	0.590001	0.218556	0.999901	1.04352	0.0315652	0.999678	0.661071	0.168654	0.999833	0.00210197	0.996595	0.99984	0.751445	0.118426	0.999973
ADAMTSL1	-0.0120149	0.98387	0.999916	-0.108842	0.854702	0.999901	-0.0939862	0.874352	0.999678	0.341276	0.56629	0.999833	-0.733514	0.234809	0.91692	-0.936228	0.118637	0.999973
AP001347.1	0.396988	0.295558	0.999916	0.41037	0.279717	0.999901	0.388148	0.306352	0.999678	0.415412	0.273905	0.999833	-0.397952	0.31006	0.945731	-0.595244	0.118708	0.999973
AL354696.2	-0.529666	0.290154	0.999916	-0.610416	0.223479	0.999901	-0.688531	0.17038	0.999678	1.06537	0.0356888	0.999833	-0.363836	0.480838	0.966679	0.784969	0.118844	0.999973
NKIRAS1	-0.150899	0.251373	0.999916	0.0487196	0.709873	0.999901	-0.0404743	0.757234	0.999678	0.0748485	0.56791	0.999833	-0.112704	0.40588	0.962742	-0.20606	0.118874	0.999973
SLC41A3	-0.0429905	0.733395	0.999916	-0.0127599	0.919441	0.999901	0.0602169	0.633439	0.999678	-0.152244	0.230124	0.999833	-0.0160489	0.902015	0.992475	-0.198259	0.119526	0.999973
AC099792.1	0.426011	0.573898	0.999916	0.299789	0.692137	0.999901	0.488878	0.518893	0.999678	0.725032	0.339675	0.999833	0.524097	0.503361	0.96826	1.18889	0.119594	0.999973
SASS6	-0.174519	0.44703	0.999916	-0.212768	0.354435	0.999901	-0.171553	0.454755	0.999678	0.189624	0.408885	0.999833	0.503632	0.0363916	0.708731	0.359646	0.119762	0.999973
GOLGA1	0.151115	0.227946	0.999916	0.111865	0.370904	0.999901	0.193647	0.123683	0.999678	-0.119971	0.337471	0.999833	-0.278392	0.0336529	0.708731	-0.195597	0.120015	0.999973
YWHAEP5	-0.375606	0.359955	0.999916	-0.0243868	0.95245	0.999901	-0.162041	0.692118	0.999678	-0.921201	0.0271042	0.978227	-0.894171	0.037458	0.714171	-0.6414	0.120256	0.999973
ANKRD9	-0.10781	0.910077	0.999916	-0.594933	0.533716	0.999901	-1.09821	0.252334	0.999678	0.715949	0.4542	0.999833	1.34768	0.174856	0.893682	1.49696	0.120273	0.999973
PGAM4	-0.323581	0.355823	0.999916	-0.0832702	0.811609	0.999901	-0.135242	0.698775	0.999678	-0.127767	0.714657	0.999833	-0.548163	0.132166	0.855163	-0.547618	0.120377	0.999973
DMAC1	0.00348304	0.983513	0.999916	-0.0337454	0.841335	0.999901	-0.00431085	0.979595	0.999678	-0.154729	0.360163	0.999833	-0.231747	0.186237	0.89916	-0.264176	0.120478	0.999973
MEMO1P1	-0.346218	0.323783	0.999916	0.140175	0.688598	0.999901	0.179754	0.607456	0.999678	-0.709147	0.0457806	0.999833	-0.438979	0.226827	0.91692	-0.547694	0.120611	0.999973
COBLL1	-0.485596	0.471685	0.999916	-0.176818	0.79291	0.999901	-0.268887	0.689825	0.999678	-1.17865	0.0835925	0.999833	-1.04503	0.136423	0.85895	-1.05479	0.120679	0.999973
RHOQ	-0.0614396	0.778149	0.999916	0.00713996	0.973874	0.999901	-0.101589	0.641509	0.999678	0.120422	0.581144	0.999833	0.280829	0.215227	0.914811	0.341154	0.121071	0.999973
MED4	-0.0659326	0.655472	0.999916	0.0138757	0.925135	0.999901	-0.0258207	0.861201	0.999678	0.214771	0.149082	0.999833	0.22352	0.146191	0.866715	0.231061	0.121077	0.999973
GOLGB1	0.245251	0.148869	0.999916	0.192569	0.25556	0.999901	0.306583	0.0724153	0.999678	-0.158218	0.349451	0.999833	-0.196288	0.261947	0.926652	-0.26353	0.12133	0.999973
CCDC120	0.0424078	0.886859	0.999916	0.146969	0.622253	0.999901	0.183773	0.538089	0.999678	-0.79791	0.0091339	0.797239	-0.770844	0.0144666	0.598929	-0.466045	0.121336	0.999973
ZNF691	-0.144983	0.383162	0.999916	-0.0951644	0.566386	0.999901	0.00672084	0.967658	0.999678	-0.103816	0.531734	0.999833	-0.121054	0.480523	0.966679	-0.259111	0.121461	0.999973
WAC-AS1	-0.144393	0.51839	0.999916	-0.136822	0.540494	0.999901	-0.134938	0.546069	0.999678	0.136094	0.542645	0.999833	0.307617	0.185254	0.89916	0.34889	0.121501	0.999973
LINC01060	-0.0665978	0.950592	0.999916	0.0578709	0.957059	0.999901	0.281253	0.793618	0.999678	1.12658	0.29659	0.999833	0.417206	0.707291	0.989289	1.67963	0.121556	0.999973
CYTL1	0.0791968	0.942595	0.999916	1.02318	0.353809	0.999901	0.538506	0.624713	0.999678	0.474714	0.666235	0.999833	1.32768	0.245125	0.922116	1.71819	0.121676	0.999973
ATP9B	0.0531454	0.719591	0.999916	0.00909416	0.950991	0.999901	-0.0768666	0.603786	0.999678	-0.0566344	0.702055	0.999833	-0.295614	0.0565838	0.764842	-0.231153	0.121677	0.999973
B3GNT9	-0.482162	0.593362	0.999916	-0.423344	0.639105	0.999901	-0.700745	0.438286	0.999678	-0.108648	0.904128	0.999833	-0.767179	0.411611	0.962742	-1.40856	0.121824	0.999973
TONSL	0.0275479	0.928805	0.999916	-0.00128646	0.996671	0.999901	-0.217146	0.482077	0.999678	-1.20404	0.000215612	0.430615	-0.459263	0.152625	0.869571	-0.481456	0.12183	0.999973
RPL26L1	0.0965514	0.53632	0.999916	0.0857635	0.582686	0.999901	0.0913313	0.558518	0.999678	-0.0679865	0.663009	0.999833	-0.294662	0.0708869	0.795446	-0.24345	0.121844	0.999973
ITPRIPL2	0.172841	0.806911	0.999916	-0.580763	0.412612	0.999901	-0.543129	0.443401	0.999678	0.564758	0.425545	0.999833	1.65819	0.0259802	0.666021	1.10395	0.121866	0.999973
MANEA-DT	0.133831	0.733928	0.999916	0.305719	0.438334	0.999901	0.407167	0.302851	0.999678	-0.597462	0.132371	0.999833	-0.0929792	0.819168	0.991747	-0.614504	0.121873	0.999973
NRGN	-0.645652	0.372647	0.999916	-0.449641	0.534037	0.999901	-0.0159578	0.982366	0.999678	-0.943384	0.194241	0.999833	-0.123113	0.868926	0.991747	1.12687	0.122017	0.999973
MAGEL2	-0.173656	0.709463	0.999916	-0.288709	0.536025	0.999901	-0.248609	0.593973	0.999678	-0.128644	0.782494	0.999833	0.354773	0.462007	0.966679	0.726236	0.122449	0.999973
FAM76A	0.0251479	0.894837	0.999916	0.236518	0.216476	0.999901	-0.0180933	0.924229	0.999678	-0.21887	0.252334	0.999833	-0.0300376	0.878548	0.991747	-0.296533	0.122492	0.999973
CTBP2P4	-0.420184	0.34591	0.999916	0.28764	0.518013	0.999901	0.547385	0.220587	0.999678	-1.05284	0.0203092	0.958772	-0.694704	0.133541	0.857986	-0.692173	0.122669	0.999973
GAPDHP63	-0.161225	0.678529	0.999916	0.216587	0.57787	0.999901	0.213257	0.583718	0.999678	-0.900438	0.0231931	0.958772	-1.09898	0.00778019	0.550993	-0.605605	0.122699	0.999973
RPS19P3	0.000832691	0.998295	0.999916	0.39283	0.315374	0.999901	0.181535	0.641643	0.999678	-0.732507	0.0636668	0.999833	-0.835937	0.0411048	0.718265	-0.606986	0.12281	0.999973
LINC02106	-0.063662	0.888917	0.999916	0.324221	0.477702	0.999901	-0.0705771	0.876945	0.999678	0.532724	0.244925	0.999833	-0.146684	0.755507	0.991747	0.709798	0.122816	0.999973
BBOF1	0.110119	0.63071	0.999916	0.0024775	0.991363	0.999901	-0.00589594	0.979447	0.999678	0.539546	0.0209458	0.958772	0.523211	0.0298329	0.696447	0.35628	0.122974	0.999973
PRDM8	0.598956	0.436417	0.999916	0.202169	0.792368	0.999901	0.216803	0.777729	0.999678	0.884654	0.251662	0.999833	0.207267	0.793937	0.991747	1.19527	0.122977	0.999973
AC245060.7	0.583509	0.0351106	0.999916	0.59921	0.0306338	0.999901	0.476741	0.0834013	0.999678	0.145349	0.593731	0.999833	0.0207467	0.94119	0.994789	-0.423362	0.123274	0.999973
AC009163.6	0.156924	0.733778	0.999916	-0.432838	0.349616	0.999901	-0.676629	0.145642	0.999678	0.383696	0.406684	0.999833	0.4031	0.398889	0.96175	0.717352	0.123286	0.999973
SLC25A6	-0.0686938	0.686976	0.999916	0.042087	0.804922	0.999901	0.00990656	0.95363	0.999678	-0.245906	0.152158	0.999833	-0.387839	0.0305038	0.699066	-0.264951	0.12334	0.999973
ARMCX5	0.0539004	0.740487	0.999916	0.0894497	0.582838	0.999901	-0.0406478	0.802727	0.999678	0.0142551	0.930171	0.999833	0.130081	0.440011	0.966679	-0.252855	0.123527	0.999973
SLC4A11	-0.265436	0.72172	0.999916	-0.250951	0.736311	0.999901	-0.297944	0.689356	0.999678	0.209656	0.778428	0.999833	-0.41801	0.587472	0.981723	-1.15707	0.123785	0.999973
NRIP2	0.334909	0.54587	0.999916	0.155008	0.779596	0.999901	0.528145	0.341886	0.999678	-0.431143	0.437285	0.999833	-0.696616	0.226019	0.91692	-0.859574	0.124024	0.999973
AC020898.1	-0.370311	0.388436	0.999916	-0.254652	0.552521	0.999901	-0.16577	0.698778	0.999678	-1.07398	0.0142704	0.901248	-0.976759	0.0301579	0.699056	-0.66455	0.124048	0.999973
RND1	0.295012	0.205492	0.999916	-0.00782527	0.973043	0.999901	-0.109231	0.637433	0.999678	-0.211964	0.361567	0.999833	0.0818782	0.732307	0.991747	-0.35938	0.124116	0.999973
AC110994.2	-0.31948	0.368799	0.999916	-0.0364764	0.918019	0.999901	-0.0323257	0.92732	0.999678	-0.56614	0.113622	0.999833	-0.244373	0.505228	0.96826	-0.549637	0.12433	0.999973
AC011477.1	0.678851	0.145454	0.999916	0.265407	0.566553	0.999901	0.724571	0.120646	0.999678	0.132487	0.774592	0.999833	-0.0343902	0.942628	0.994789	0.716696	0.124659	0.999973
KLKB1	0.196692	0.779981	0.999916	0.290697	0.679823	0.999901	0.224183	0.750212	0.999678	-0.700031	0.321826	0.999833	-1.03559	0.157683	0.872809	-1.09033	0.124822	0.999973
ZNF888	-0.0610237	0.863115	0.999916	0.250613	0.479711	0.999901	-0.272499	0.442358	0.999678	0.216221	0.54181	0.999833	0.798035	0.0320568	0.708731	0.548126	0.124863	0.999973
DGCR6L	-0.0205483	0.910675	0.999916	0.0441094	0.809725	0.999901	0.0267085	0.884068	0.999678	-0.115864	0.527627	0.999833	-0.251177	0.187372	0.89916	-0.28345	0.125145	0.999973
TAB3	-0.0339367	0.928578	0.999916	0.144948	0.701991	0.999901	-0.0456521	0.904028	0.999678	0.195687	0.605621	0.999833	0.335713	0.392119	0.960423	0.585901	0.125164	0.999973
TBCA	-0.159679	0.305564	0.999916	0.00906124	0.953448	0.999901	0.100603	0.517566	0.999678	0.244117	0.119235	0.999833	0.0464206	0.772302	0.991747	0.240153	0.12524	0.999973
MTCO2P2	-0.0747814	0.858413	0.999916	-0.201926	0.630281	0.999901	0.249197	0.552691	0.999678	-0.746372	0.0785093	0.999833	-1.13647	0.0105274	0.568666	-0.648483	0.12525	0.999973
AC092119.2	0.244573	0.701668	0.999916	0.00180349	0.997745	0.999901	0.265379	0.677692	0.999678	-0.718543	0.262458	0.999833	-0.697515	0.29214	0.937002	-0.987188	0.125272	0.999973
AC004263.2	0.701713	0.242416	0.999916	0.0418456	0.944131	0.999901	-0.00961883	0.987147	0.999678	-0.637186	0.288029	0.999833	0.066515	0.914146	0.992977	-0.923662	0.125318	0.999973
AC000089.1	-0.144996	0.779106	0.999916	0.656033	0.207087	0.999901	0.326372	0.528324	0.999678	-0.728262	0.161953	0.999833	-0.832857	0.122255	0.851276	-0.799292	0.125377	0.999973
VOPP1	-0.0882895	0.68191	0.999916	-0.101116	0.63885	0.999901	-0.184453	0.39288	0.999678	0.0946644	0.660365	0.999833	0.178814	0.422593	0.96413	0.332867	0.125475	0.999973
ATF4P3	-0.340417	0.314291	0.999916	-0.0352374	0.91672	0.999901	-0.0319524	0.924459	0.999678	-0.419672	0.215707	0.999833	-1.20119	0.000949552	0.31527	-0.520611	0.125782	0.999973
AC107954.1	-0.148427	0.719671	0.999916	-0.375647	0.364998	0.999901	0.0049964	0.990356	0.999678	-0.458049	0.27007	0.999833	-0.291627	0.49549	0.967231	-0.638536	0.125831	0.999973
IL10RB	-0.165972	0.831826	0.999916	-0.052103	0.94684	0.999901	-0.0274119	0.972016	0.999678	-0.816356	0.298189	0.999833	1.17479	0.148926	0.867475	-1.20653	0.126009	0.999973
SMIM26	-0.0723843	0.723239	0.999916	0.0492586	0.809511	0.999901	0.0709753	0.728406	0.999678	0.285937	0.164789	0.999833	0.170042	0.421656	0.963741	0.315427	0.126027	0.999973
AL162458.1	0.117494	0.817007	0.999916	0.179648	0.72356	0.999901	-0.0470585	0.926147	0.999678	-0.158543	0.7549	0.999833	1.08315	0.0421467	0.721684	0.783685	0.12608	0.999973
RLN1	-0.315622	0.541275	0.999916	-0.271562	0.599024	0.999901	-0.108697	0.833159	0.999678	-1.54312	0.00379834	0.725148	0.366627	0.492377	0.967231	-0.796411	0.126091	0.999973
MRPL55	0.139923	0.448318	0.999916	0.190612	0.30257	0.999901	0.240064	0.195216	0.999678	-0.239993	0.195347	0.999833	-0.259265	0.176015	0.895956	-0.284217	0.126119	0.999973
CNPY2	0.146586	0.473947	0.999916	0.0920923	0.652413	0.999901	0.11945	0.559285	0.999678	-0.308613	0.134272	0.999833	-0.30567	0.150857	0.868302	-0.315292	0.12619	0.999973
FGF7P6	-0.735248	0.154913	0.999916	0.171002	0.73892	0.999901	-0.00183292	0.997148	0.999678	0.970863	0.0618325	0.999833	0.672633	0.207111	0.912391	0.791275	0.126289	0.999973
DDX31	-0.081705	0.706234	0.999916	0.010003	0.963174	0.999901	-0.176079	0.417563	0.999678	-0.0381579	0.860212	0.999833	-0.00608616	0.978309	0.998351	-0.334218	0.126339	0.999973
ARHGEF15	-0.063662	0.930756	0.999916	-0.309764	0.672642	0.999901	-1.02155	0.166345	0.999678	-1.11012	0.133086	0.999833	-1.35567	0.0768474	0.808234	-1.13002	0.12639	0.999973
AF279873.1	-0.254707	0.550636	0.999916	0.00244431	0.995424	0.999901	0.0829812	0.845648	0.999678	-0.888611	0.0402589	0.999833	-0.330303	0.454178	0.966679	-0.657289	0.126441	0.999973
AL031963.3	-0.246301	0.765512	0.999916	-0.552521	0.50405	0.999901	-0.872674	0.29254	0.999678	0.247108	0.764767	0.999833	1.80338	0.0376212	0.714171	1.27302	0.126484	0.999973
ACTA1	-0.320605	0.687347	0.999916	0.134068	0.866282	0.999901	-0.212821	0.789277	0.999678	-0.578816	0.468106	0.999833	0.106569	0.896923	0.992475	-1.22764	0.12649	0.999973
AC004540.2	-0.246915	0.674256	0.999916	-0.280719	0.632821	0.999901	-0.741309	0.209456	0.999678	0.75102	0.203622	0.999833	0.609754	0.316644	0.946626	0.904851	0.126655	0.999973
FNTB	0.131357	0.383822	0.999916	0.111751	0.458398	0.999901	-0.0382946	0.799055	0.999678	-0.104776	0.486812	0.999833	0.0849423	0.585049	0.981723	-0.231755	0.126733	0.999973
CABLES1	0.529475	0.361671	0.999916	0.0787851	0.891694	0.999901	-0.643607	0.268243	0.999678	0.63744	0.272813	0.999833	0.615825	0.304907	0.943791	0.891529	0.126762	0.999973
DPM3	0.155273	0.531281	0.999916	0.000834591	0.997311	0.999901	0.0348207	0.888188	0.999678	-0.557327	0.0272354	0.978227	-0.436504	0.0915672	0.826336	-0.381401	0.12695	0.999973
PDE7B	0.368566	0.56811	0.999916	0.186743	0.772198	0.999901	0.0561136	0.930658	0.999678	-0.99835	0.125004	0.999833	0.0320576	0.961624	0.995903	-0.993082	0.126971	0.999973
ZNF165	0.167416	0.594576	0.999916	0.28003	0.374287	0.999901	0.240659	0.444769	0.999678	-0.0921578	0.769373	0.999833	0.301392	0.354825	0.957323	0.483413	0.127353	0.999973
AC034102.2	0.335372	0.666282	0.999916	0.0431206	0.955749	0.999901	0.596715	0.4436	0.999678	-1.7984	0.0233143	0.958772	-3.08293	0.000268582	0.300494	-1.19501	0.127521	0.999973
AL359715.3	-0.222097	0.742037	0.999916	-0.186007	0.782774	0.999901	-0.171972	0.798791	0.999678	0.190186	0.778024	0.999833	-0.821403	0.241019	0.920326	-1.03703	0.127572	0.999973
BRD7	0.113343	0.744307	0.999916	-0.201853	0.561691	0.999901	-0.2546	0.464524	0.999678	0.0392964	0.909935	0.999833	0.416745	0.248028	0.922116	0.5339	0.127714	0.999973
PRMT1	-0.0926493	0.586419	0.999916	-0.0281614	0.868523	0.999901	-0.00501888	0.976462	0.999678	-0.209225	0.221387	0.999833	-0.33588	0.0594554	0.774126	-0.261364	0.127837	0.999973
CEP164	0.276734	0.189395	0.999916	0.151852	0.469373	0.999901	0.270007	0.200238	0.999678	0.0734688	0.725898	0.999833	-0.237017	0.275646	0.931027	0.321802	0.127869	0.999973
Z74021.1	0.393542	0.308563	0.999916	0.472016	0.222787	0.999901	0.336041	0.384077	0.999678	-0.746631	0.055853	0.999833	-0.740574	0.0661054	0.785029	-0.591196	0.127998	0.999973
AL139089.1	0.446683	0.254391	0.999916	0.594501	0.130759	0.999901	0.481461	0.219636	0.999678	0.496092	0.206105	0.999833	-0.447612	0.26884	0.929266	-0.598803	0.128045	0.999973
CEP350	0.225455	0.164712	0.999916	0.153729	0.341522	0.999901	0.175738	0.2774	0.999678	0.295896	0.0697011	0.999833	0.249874	0.136559	0.85895	0.247315	0.128053	0.999973
ENO4	0.0626278	0.869994	0.999916	0.0672995	0.860394	0.999901	-0.0204574	0.95736	0.999678	-0.120613	0.752676	0.999833	0.771319	0.0544542	0.761107	0.587482	0.12809	0.999973
ZNF500	0.0864788	0.625971	0.999916	0.0137741	0.938065	0.999901	0.168413	0.343755	0.999678	-0.452218	0.0127728	0.897433	-0.273721	0.138391	0.85895	-0.272129	0.128156	0.999973
ZNF45	0.0937866	0.631267	0.999916	-0.0548947	0.778646	0.999901	-0.112718	0.564213	0.999678	-0.120286	0.538425	0.999833	0.0714545	0.7233	0.990749	-0.299701	0.128182	0.999973
AC098934.1	-0.0340521	0.896792	0.999916	-0.0839432	0.749226	0.999901	-0.172333	0.512198	0.999678	-0.10765	0.681929	0.999833	-0.18489	0.496197	0.967231	-0.402758	0.128361	0.999973
C14orf28	0.0509417	0.819864	0.999916	0.0598926	0.788922	0.999901	0.265576	0.237602	0.999678	0.20546	0.359851	0.999833	0.421351	0.0717852	0.798048	0.343164	0.128363	0.999973
CBX3	-0.0432259	0.754125	0.999916	0.0191306	0.88972	0.999901	0.0456415	0.740876	0.999678	0.233361	0.0942877	0.999833	0.245524	0.0885393	0.826336	0.211654	0.128396	0.999973
CTU1	0.0708936	0.960727	0.999916	-0.916321	0.52512	0.999901	-1.31753	0.361666	0.999678	0.231848	0.872075	0.999833	1.25782	0.399085	0.96175	2.20771	0.128575	0.999973
TMSB4XP1	-0.277194	0.604566	0.999916	0.412511	0.441495	0.999901	0.193074	0.718182	0.999678	-1.27536	0.0195518	0.958772	-1.35689	0.0163378	0.605677	-0.819885	0.128618	0.999973
FGF18	-0.863449	0.301935	0.999916	-0.761613	0.362097	0.999901	-0.669821	0.422486	0.999678	0.334091	0.688548	0.999833	1.12135	0.195508	0.903971	1.27719	0.128622	0.999973
EGR2	-0.983861	0.27028	0.999916	0.0511505	0.95408	0.999901	-0.208957	0.814059	0.999678	-0.612466	0.491296	0.999833	-0.00928917	0.991924	0.999791	-1.36182	0.128652	0.999973
SNU13	-0.116284	0.315957	0.999916	-0.0365227	0.751949	0.999901	-0.00951816	0.934328	0.999678	-0.0966036	0.404232	0.999833	-0.0947837	0.428199	0.965918	-0.177078	0.128675	0.999973
NACA2	-0.0217909	0.956469	0.999916	-0.129371	0.745984	0.999901	0.648235	0.107929	0.999678	-0.16346	0.682395	0.999833	-0.643233	0.122327	0.851276	-0.61198	0.128688	0.999973
CDK11A	0.172305	0.702266	0.999916	0.364809	0.419235	0.999901	0.281573	0.532571	0.999678	0.531097	0.24094	0.999833	-0.117254	0.801156	0.991747	0.690522	0.128734	0.999973
GPR63	0.636015	0.0911172	0.999916	0.569206	0.129682	0.999901	0.370869	0.321006	0.999678	0.28481	0.445283	0.999833	0.2583	0.502634	0.96826	-0.570632	0.128741	0.999973
AL590617.2	-0.125242	0.806967	0.999916	-0.135705	0.791209	0.999901	-0.109591	0.83069	0.999678	0.18784	0.714098	0.999833	0.111721	0.832913	0.991747	0.785468	0.128746	0.999973
BANF1P3	0.349011	0.405935	0.999916	-0.347363	0.408144	0.999901	0.238429	0.569655	0.999678	-1.01266	0.0180024	0.935263	-0.933092	0.0341056	0.708731	-0.641956	0.128752	0.999973
KMT5A	-0.0189269	0.941974	0.999916	-0.111166	0.669214	0.999901	-0.089813	0.729908	0.999678	-0.437922	0.0956946	0.999833	-0.101333	0.70619	0.989116	0.398479	0.12881	0.999973
ZNF221	0.12214	0.706626	0.999916	0.188315	0.561996	0.999901	0.180978	0.577294	0.999678	-0.0821772	0.800024	0.999833	-0.0230658	0.945123	0.994891	-0.496637	0.129104	0.999973
TOGARAM1	0.261874	0.0452114	0.999916	0.250099	0.0554666	0.999901	0.305371	0.0201961	0.999678	-0.0513741	0.690021	0.999833	-0.172953	0.196389	0.904393	-0.197	0.129352	0.999973
TST	0.0144036	0.969577	0.999916	0.0607855	0.872144	0.999901	0.0359052	0.92426	0.999678	-0.135009	0.72086	0.999833	-0.154899	0.69157	0.987662	-0.57786	0.129399	0.999973
ASB7	0.0528544	0.708347	0.999916	0.0514472	0.715762	0.999901	0.0127996	0.927782	0.999678	-0.0184629	0.895986	0.999833	0.000699007	0.996178	0.99984	-0.216008	0.129514	0.999973
MRPS31P5	0.194318	0.534247	0.999916	0.148277	0.635093	0.999901	0.306992	0.327211	0.999678	0.160277	0.608021	0.999833	-0.262953	0.416122	0.962742	-0.47734	0.129647	0.999973
RAP2A	-0.0383791	0.887216	0.999916	-0.0082017	0.975819	0.999901	-0.184307	0.496547	0.999678	0.18953	0.484473	0.999833	0.558115	0.0492414	0.742302	0.413742	0.129648	0.999973
DNAJC11	0.0648032	0.673672	0.999916	0.149746	0.331935	0.999901	0.0829741	0.589915	0.999678	-0.147013	0.340774	0.999833	-0.0861896	0.587926	0.981723	-0.235116	0.129688	0.999973
GTF2IP4	-0.0928042	0.906857	0.999916	-0.586613	0.460481	0.999901	-0.783475	0.325058	0.999678	0.587868	0.459527	0.999833	1.17755	0.15397	0.871913	1.2125	0.129731	0.999973
AL355802.1	-0.06287	0.904278	0.999916	0.0536933	0.918196	0.999901	-0.0483745	0.926274	0.999678	-0.917261	0.0828776	0.999833	-0.815591	0.134416	0.858567	-0.799093	0.129767	0.999973
KEAP1	-0.0616792	0.685212	0.999916	0.0610733	0.688138	0.999901	0.0326977	0.829775	0.999678	-0.111293	0.465159	0.999833	-0.150952	0.338376	0.955627	-0.232416	0.129809	0.999973
PTBP1	0.0464182	0.777719	0.999916	0.0350197	0.831327	0.999901	-0.103245	0.53058	0.999678	-0.343464	0.0398498	0.999833	-0.283889	0.0981682	0.829633	-0.251207	0.129869	0.999973
AC103778.1	-0.13136	0.845867	0.999916	0.0653208	0.922984	0.999901	0.0355852	0.957996	0.999678	-0.523405	0.439591	0.999833	-0.791976	0.258939	0.926562	-1.03219	0.129987	0.999973
KCNMB4	0.0988409	0.774978	0.999916	-0.272996	0.430747	0.999901	-0.324113	0.350032	0.999678	0.267534	0.439982	0.999833	0.388296	0.279098	0.931316	0.528036	0.129995	0.999973
AL031729.1	0.423551	0.307636	0.999916	0.177065	0.668714	0.999901	0.524287	0.207615	0.999678	-0.743061	0.0758768	0.999833	-1.22918	0.00525913	0.499129	-0.630933	0.130444	0.999973
SH3BP5L	-0.0197634	0.924488	0.999916	0.0532127	0.798611	0.999901	0.0290227	0.889305	0.999678	-0.194492	0.352544	0.999833	-0.260022	0.230043	0.91692	-0.318088	0.13052	0.999973
CBARP	-0.208393	0.790242	0.999916	-0.453129	0.563405	0.999901	-0.549749	0.483574	0.999678	-0.00511677	0.994788	0.999833	1.04994	0.197368	0.905736	1.19473	0.130561	0.999973
MIR29B2CHG	0.0549642	0.930101	0.999916	0.295874	0.637073	0.999901	0.252212	0.687488	0.999678	-0.418122	0.505311	0.999833	1.09866	0.0932402	0.826336	0.955256	0.13077	0.999973
FAM185A	0.254082	0.135652	0.999916	-0.073847	0.662013	0.999901	0.169101	0.318344	0.999678	0.230632	0.17494	0.999833	-0.0729051	0.676155	0.987213	0.257349	0.130781	0.999973
GRIN2B	0.191846	0.719876	0.999916	0.322612	0.546827	0.999901	0.612599	0.254303	0.999678	0.24952	0.641017	0.999833	-0.290256	0.599689	0.981746	0.815041	0.13082	0.999973
AL035530.2	-0.589019	0.10624	0.999916	-0.13058	0.717671	0.999901	0.0714376	0.84314	0.999678	0.524897	0.149175	0.999833	-0.013331	0.971486	0.997582	0.550109	0.130904	0.999973
C2orf76	-0.102807	0.560065	0.999916	-0.116404	0.509529	0.999901	0.00706721	0.968004	0.999678	0.365809	0.0410757	0.999833	-0.0665912	0.714649	0.989289	0.26838	0.131087	0.999973
KLHDC3	-0.0500734	0.662235	0.999916	0.00288541	0.979903	0.999901	-0.0580876	0.612426	0.999678	-0.0744599	0.516345	0.999833	-0.0298979	0.800606	0.991747	-0.17442	0.131223	0.999973
ZNF565	0.327223	0.104037	0.999916	0.300186	0.135262	0.999901	0.32313	0.108349	0.999678	0.133568	0.503346	0.999833	-0.0105939	0.958957	0.995597	-0.303169	0.131489	0.999973
BCL7C	-0.0343657	0.931189	0.999916	-0.210076	0.597992	0.999901	-0.28294	0.477978	0.999678	0.122592	0.75814	0.999833	0.462027	0.26349	0.927115	0.605549	0.131511	0.999973
NCKIPSD	-0.20276	0.261381	0.999916	-0.115755	0.520025	0.999901	-0.215331	0.233251	0.999678	-0.354252	0.052001	0.999833	-0.336951	0.0730124	0.799138	-0.273335	0.131528	0.999973
CENPN	0.110707	0.702956	0.999916	0.098948	0.733203	0.999901	-0.212362	0.465152	0.999678	0.182596	0.529775	0.999833	0.345988	0.250878	0.924729	0.441252	0.131711	0.999973
GCSHP5	0.0508515	0.830477	0.999916	0.171158	0.471971	0.999901	0.26001	0.27579	0.999678	-0.038932	0.869794	0.999833	0.116749	0.634507	0.982792	-0.361093	0.131774	0.999973
LRRC37A16P	0.0451387	0.818951	0.999916	0.0932183	0.63665	0.999901	0.134209	0.496833	0.999678	0.0225641	0.908891	0.999833	0.214385	0.294676	0.937207	0.299362	0.132316	0.999973
RPL41P5	0.10137	0.754107	0.999916	0.116633	0.718588	0.999901	0.376819	0.246563	0.999678	-0.515093	0.114819	0.999833	-0.650982	0.0548797	0.762595	-0.490843	0.132588	0.999973
RPL41	-0.0395639	0.75911	0.999916	0.0163494	0.899132	0.999901	0.0487131	0.705809	0.999678	0.30693	0.0198116	0.958772	0.085565	0.521468	0.97125	0.195675	0.132609	0.999973
RPS5	-0.0624614	0.738119	0.999916	0.0261628	0.888585	0.999901	-0.0140551	0.940003	0.999678	-0.176061	0.347418	0.999833	-0.33294	0.0879711	0.825271	-0.283199	0.132759	0.999973
GOLGA2P5	0.994822	0.183124	0.999916	0.435283	0.558072	0.999901	0.0830623	0.910895	0.999678	-1.69752	0.0249135	0.958772	-0.678925	0.377406	0.958882	-1.12536	0.132834	0.999973
AP006621.3	-0.136194	0.650593	0.999916	-0.279078	0.354562	0.999901	0.119005	0.692217	0.999678	-0.246402	0.413368	0.999833	-0.695832	0.0278349	0.681462	-0.455524	0.13287	0.999973
ORC1	0.0290081	0.953179	0.999916	-0.0518408	0.916434	0.999901	-0.393966	0.426338	0.999678	-0.751919	0.131412	0.999833	0.53109	0.300154	0.94183	-0.748427	0.133182	0.999973
MFAP5	-1.64952	0.224221	0.999916	-0.891401	0.509601	0.999901	-0.76657	0.570471	0.999678	-1.43321	0.290294	0.999833	-2.06511	0.141889	0.863939	-2.04367	0.133291	0.999973
RPTOR	0.140105	0.497414	0.999916	-0.00373851	0.985528	0.999901	0.103614	0.615503	0.999678	-0.139392	0.499599	0.999833	-0.389112	0.0711941	0.795729	-0.31211	0.133325	0.999973
AL031727.1	-0.244507	0.594864	0.999916	-0.252254	0.583272	0.999901	0.665992	0.150292	0.999678	-0.283082	0.538244	0.999833	-0.881251	0.0668021	0.786126	-0.695139	0.133513	0.999973
HMGN2P5	0.152817	0.550056	0.999916	0.183448	0.473349	0.999901	0.196253	0.44316	0.999678	-0.466166	0.0714236	0.999833	-0.416621	0.117751	0.849906	-0.386426	0.133551	0.999973
GRPR	-0.305078	0.650128	0.999916	-0.049498	0.941289	0.999901	-0.215648	0.7484	0.999678	0.193045	0.773994	0.999833	-1.19147	0.0897402	0.826336	1.01692	0.133622	0.999973
PARP16	-0.0268377	0.878347	0.999916	0.073487	0.675305	0.999901	0.0853977	0.626504	0.999678	0.356915	0.0450495	0.999833	0.18918	0.298339	0.939864	0.265236	0.133689	0.999973
VDAC1P2	-0.614079	0.063271	0.999916	-0.165467	0.612352	0.999901	0.227817	0.48578	0.999678	-0.579569	0.0791857	0.999833	-0.548793	0.107	0.84154	-0.493365	0.133821	0.999973
VPS16	-0.0175914	0.889113	0.999916	-0.0236526	0.851304	0.999901	-0.0943373	0.455581	0.999678	-0.0629243	0.618284	0.999833	-0.0688311	0.597862	0.981723	-0.190647	0.134127	0.999973
NFKB2	-0.410489	0.562671	0.999916	-0.486876	0.492562	0.999901	-0.862786	0.225752	0.999678	0.407611	0.565406	0.999833	0.220579	0.763147	0.991747	1.07009	0.134161	0.999973
CCDC124	0.000477778	0.997986	0.999916	0.00586103	0.975293	0.999901	0.129956	0.49305	0.999678	-0.270869	0.155564	0.999833	-0.482528	0.0158497	0.605677	-0.285948	0.134164	0.999973
MXRA5	0.346806	0.749171	0.999916	-0.34061	0.753502	0.999901	-0.305166	0.778428	0.999678	-2.00628	0.0677734	0.999833	-0.820602	0.464781	0.966679	-1.6374	0.134374	0.999973
RETREG3	0.0166597	0.869899	0.999916	-0.0265751	0.793918	0.999901	-0.0141939	0.889017	0.999678	-0.0451572	0.657287	0.999833	-0.0341304	0.745438	0.991747	-0.15349	0.13463	0.999973
NR2C2AP	-0.278037	0.127843	0.999916	-0.152487	0.400714	0.999901	-0.161894	0.372458	0.999678	0.13816	0.4462	0.999833	-0.278423	0.139794	0.859583	0.273013	0.134753	0.999973
CUBN	0.0714269	0.791544	0.999916	0.121616	0.652859	0.999901	0.0428125	0.874103	0.999678	0.16241	0.548307	0.999833	0.000522472	0.998507	0.99984	-0.407537	0.134814	0.999973
NUP85	-0.0115972	0.932625	0.999916	-0.00963477	0.944005	0.999901	-0.0504184	0.713346	0.999678	-0.0580208	0.672523	0.999833	0.00194384	0.989057	0.999791	-0.206888	0.134864	0.999973
SLC7A2	0.00940945	0.986123	0.999916	-0.264163	0.625647	0.999901	-0.334073	0.537475	0.999678	0.219257	0.685443	0.999833	1.23068	0.0306136	0.699066	0.815808	0.134914	0.999973
PCGF2	-0.243721	0.374701	0.999916	0.0757678	0.781987	0.999901	-0.35327	0.199692	0.999678	-0.3811	0.166963	0.999833	-0.322825	0.256037	0.926562	-0.412184	0.135464	0.999973
HJURP	0.0979429	0.911281	0.999916	0.0677245	0.938586	0.999901	-0.177814	0.83971	0.999678	1.2568	0.155988	0.999833	-2.00967	0.0298174	0.696447	1.32351	0.135504	0.999973
SERHL2	0.0871696	0.903538	0.999916	0.0703022	0.922135	0.999901	0.2765	0.700811	0.999678	-1.45482	0.0463983	0.999833	-1.26126	0.0931966	0.826336	-1.08249	0.135666	0.999973
RAB6C	-0.049845	0.828466	0.999916	-0.251263	0.27686	0.999901	0.459495	0.0490904	0.999678	-0.0731326	0.750614	0.999833	-0.216087	0.364736	0.958022	-0.345986	0.13589	0.999973
PRSS23	-0.275796	0.417266	0.999916	-0.17655	0.603028	0.999901	-0.390245	0.252258	0.999678	-0.425354	0.212507	0.999833	0.134515	0.701217	0.989116	-0.510083	0.135922	0.999973
LSM12P1	-0.247726	0.235811	0.999916	0.00473292	0.981831	0.999901	0.155863	0.454245	0.999678	-0.328205	0.117747	0.999833	-0.217416	0.313191	0.946367	-0.312524	0.135996	0.999973
FAM3C2	-0.105572	0.605349	0.999916	-0.0917609	0.653259	0.999901	0.0298074	0.883896	0.999678	-0.255045	0.214181	0.999833	-0.0316083	0.880862	0.991875	-0.306924	0.135997	0.999973
DEDD	-0.0438917	0.731244	0.999916	-0.0362838	0.776428	0.999901	-0.0260374	0.838499	0.999678	-0.0194092	0.879234	0.999833	0.0297146	0.821891	0.991747	0.192081	0.135997	0.999973
ARHGEF37	-0.271109	0.535959	0.999916	-0.0433582	0.921036	0.999901	-0.454059	0.301208	0.999678	-0.769493	0.0820759	0.999833	-0.606376	0.18266	0.897409	-0.657682	0.136022	0.999973
CD24P4	0.015334	0.96676	0.999916	0.220112	0.550272	0.999901	0.452599	0.22138	0.999678	-0.744639	0.0463075	0.999833	-0.668041	0.0824537	0.817441	-0.553171	0.136124	0.999973
LINC02315	-0.0411248	0.874835	0.999916	0.0838408	0.748182	0.999901	0.0597041	0.819134	0.999678	-0.484334	0.0670633	0.999833	-0.42429	0.119167	0.850181	-0.392395	0.136169	0.999973
SLC2A4RG	-0.299761	0.453045	0.999916	-0.345181	0.387902	0.999901	-0.358115	0.370474	0.999678	-0.680948	0.0911466	0.999833	0.00314944	0.993899	0.99984	0.598982	0.136299	0.999973
AHCY	-0.0144714	0.924409	0.999916	0.0175514	0.908386	0.999901	-0.0602842	0.692821	0.999678	-0.0607411	0.690615	0.999833	-0.200927	0.205101	0.911318	-0.229158	0.136321	0.999973
PPP3CA	-0.0129277	0.950571	0.999916	-0.0729886	0.726469	0.999901	-0.0522523	0.802202	0.999678	0.168221	0.421035	0.999833	0.299596	0.167531	0.886873	0.313277	0.136404	0.999973
AL138976.2	-0.0835499	0.874567	0.999916	-0.0765324	0.885024	0.999901	-0.541637	0.308034	0.999678	0.278761	0.598762	0.999833	1.31448	0.0186428	0.608198	0.794931	0.136434	0.999973
STRIP1	0.0507309	0.696787	0.999916	0.0269921	0.835688	0.999901	0.0760534	0.559399	0.999678	-0.128556	0.324965	0.999833	-0.0395041	0.768949	0.991747	-0.195286	0.13675	0.999973
ZNF880	0.132008	0.44201	0.999916	0.192039	0.264602	0.999901	0.269268	0.119461	0.999678	-0.0322855	0.850537	0.999833	-0.13145	0.458654	0.966679	-0.256965	0.13698	0.999973
GCSH	0.0492652	0.879867	0.999916	0.0910399	0.780063	0.999901	0.0634885	0.845579	0.999678	0.370218	0.258369	0.999833	0.433238	0.201123	0.908163	0.488837	0.137022	0.999973
AFAP1L2	-0.128751	0.77378	0.999916	-0.379701	0.397778	0.999901	-0.341199	0.447101	0.999678	-0.248378	0.579568	0.999833	-0.551618	0.235709	0.91692	-0.6713	0.137193	0.999973
MON1A	0.32862	0.0607853	0.999916	0.141417	0.414548	0.999901	0.260124	0.13577	0.999678	-0.187266	0.280874	0.999833	-0.270534	0.133256	0.857332	-0.258996	0.137447	0.999973
AC107959.1	0.253992	0.697833	0.999916	0.214129	0.743389	0.999901	0.0291961	0.964383	0.999678	0.343342	0.599879	0.999833	1.01315	0.137029	0.85895	0.979256	0.137553	0.999973
PRPS2	-0.13129	0.682186	0.999916	-0.181009	0.572603	0.999901	-0.309446	0.335899	0.999678	0.540949	0.0949091	0.999833	0.300318	0.365851	0.958022	0.479775	0.137656	0.999973
NSUN3	0.0664463	0.635445	0.999916	0.151213	0.282386	0.999901	0.130544	0.352842	0.999678	-0.0667102	0.634106	0.999833	0.133513	0.357708	0.957323	-0.209671	0.137681	0.999973
SMC3	0.0780428	0.564941	0.999916	0.187227	0.169946	0.999901	0.14731	0.278906	0.999678	0.123099	0.364905	0.999833	0.112864	0.421072	0.96369	0.202703	0.137815	0.999973
SNTB1	-0.276247	0.747906	0.999916	-0.0398474	0.963008	0.999901	-0.201924	0.81423	0.999678	0.236753	0.782947	0.999833	-0.422242	0.634614	0.982792	1.28503	0.13809	0.999973
GABARAP	-0.327579	0.0983028	0.999916	-0.362341	0.0681044	0.999901	0.0424154	0.828755	0.999678	0.350715	0.0771949	0.999833	0.152487	0.452588	0.966679	0.293214	0.138128	0.999973
FTSJ3	-0.00464438	0.976268	0.999916	-0.0767127	0.6235	0.999901	-0.167404	0.285741	0.999678	-0.178622	0.254973	0.999833	-0.207047	0.202151	0.909892	-0.233461	0.138174	0.999973
COL4A5	0.149019	0.857098	0.999916	0.078382	0.924535	0.999901	-0.00385787	0.99628	0.999678	-0.25145	0.761301	0.999833	-0.406503	0.634745	0.982792	1.2353	0.138815	0.999973
THSD1	-0.424353	0.34697	0.999916	-0.093241	0.835757	0.999901	-0.498853	0.269524	0.999678	0.122115	0.786012	0.999833	0.724909	0.122136	0.851276	-0.670771	0.139116	0.999973
WAC	-0.0840192	0.51889	0.999916	0.0244839	0.850679	0.999901	-0.0317279	0.807287	0.999678	0.0884911	0.496966	0.999833	0.114201	0.396662	0.961035	0.19393	0.139227	0.999973
STK16	0.111184	0.52119	0.999916	0.0973401	0.574222	0.999901	0.0871412	0.614895	0.999678	-0.0757063	0.661976	0.999833	-0.0701198	0.695083	0.9879	-0.257856	0.139523	0.999973
SOS1	0.0150407	0.943866	0.999916	-0.045688	0.830662	0.999901	-0.160514	0.453367	0.999678	0.172974	0.419243	0.999833	0.461261	0.0397971	0.718265	0.317939	0.139973	0.999973
TIMM8B	0.0154034	0.929822	0.999916	0.0291288	0.86774	0.999901	0.0571378	0.744001	0.999678	-0.142122	0.417633	0.999833	-0.276337	0.129616	0.851439	-0.260312	0.139991	0.999973
TTPA	0.026597	0.97617	0.999916	0.0411014	0.963182	0.999901	-0.178863	0.840815	0.999678	0.528755	0.553154	0.999833	-0.754587	0.413291	0.962742	-1.32511	0.140026	0.999973
AC009779.3	0.00486772	0.990753	0.999916	-0.418573	0.320812	0.999901	0.252138	0.548848	0.999678	0.813002	0.0563345	0.999833	0.9328	0.034646	0.708731	0.624949	0.140099	0.999973
C11orf45	-0.889681	0.224664	0.999916	-0.566012	0.438275	0.999901	-1.17647	0.109849	0.999678	0.155338	0.831185	0.999833	0.673883	0.372132	0.958882	1.0839	0.140146	0.999973
AL136169.1	0.135547	0.70719	0.999916	-0.276927	0.443614	0.999901	-0.0666865	0.853322	0.999678	0.0215263	0.952405	0.999833	0.333521	0.372239	0.958882	0.536522	0.140182	0.999973
RPL21P18	0.0258105	0.961441	0.999916	-0.242549	0.649862	0.999901	0.190434	0.721448	0.999678	0.395579	0.459673	0.999833	0.430631	0.436069	0.966679	0.793891	0.140343	0.999973
SUDS3	-0.181734	0.0933077	0.999916	-0.160706	0.136879	0.999901	-0.0621632	0.562179	0.999678	-0.14452	0.180287	0.999833	-0.176485	0.114261	0.847117	-0.159225	0.140472	0.999973
CCDC12	0.0351459	0.831983	0.999916	0.102345	0.537235	0.999901	0.0219165	0.894736	0.999678	-0.167736	0.313106	0.999833	-0.317558	0.0670156	0.786126	-0.246035	0.140757	0.999973
AL117332.1	-0.251525	0.479043	0.999916	-0.0828261	0.815378	0.999901	0.373067	0.294888	0.999678	-0.264505	0.456744	0.999833	-0.266606	0.467781	0.966679	-0.526778	0.140785	0.999973
TSPAN9	0.241516	0.511204	0.999916	0.348259	0.344341	0.999901	0.163264	0.656674	0.999678	-0.828234	0.026831	0.978227	-1.12812	0.00397805	0.464755	-0.545037	0.140856	0.999973
MEAK7	-0.0361876	0.799398	0.999916	-0.0805755	0.571884	0.999901	-0.0921561	0.5181	0.999678	-0.0661916	0.64225	0.999833	-0.0281634	0.848181	0.991747	-0.211411	0.140878	0.999973
KRBA1	0.275509	0.382579	0.999916	0.0447369	0.886929	0.999901	-0.0218741	0.944569	0.999678	0.201849	0.521793	0.999833	-0.253056	0.437337	0.966679	0.467174	0.140883	0.999973
NIF3L1	0.0294755	0.81306	0.999916	0.0864201	0.488808	0.999901	-0.0821009	0.510712	0.999678	-0.104195	0.40435	0.999833	-0.0478544	0.710284	0.989289	-0.185024	0.14094	0.999973
AL627402.1	-0.223598	0.418519	0.999916	-0.272456	0.324841	0.999901	-0.329006	0.235275	0.999678	-0.308979	0.264701	0.999833	-0.405934	0.157342	0.872698	-0.409262	0.141008	0.999973
HIST1H2BF	-0.276363	0.542348	0.999916	0.201747	0.65627	0.999901	-0.01615	0.971557	0.999678	-0.20701	0.647915	0.999833	-0.188991	0.68652	0.987662	-0.672249	0.141095	0.999973
CENPI	0.0666388	0.859166	0.999916	-0.306234	0.415986	0.999901	0.0367999	0.921937	0.999678	-0.0210704	0.955255	0.999833	-0.73683	0.0610245	0.781405	-0.557195	0.141192	0.999973
AC092017.2	-0.111131	0.671011	0.999916	-0.220279	0.400784	0.999901	-0.0795507	0.761007	0.999678	-0.184125	0.48212	0.999833	-0.38267	0.159795	0.874943	-0.387932	0.1412	0.999973
ANKRD45	-0.421552	0.455137	0.999916	-0.643826	0.255357	0.999901	-0.844673	0.13703	0.999678	0.843816	0.137422	0.999833	0.598443	0.305719	0.944145	0.835636	0.14121	0.999973
DAZAP1	-0.188579	0.6269	0.999916	-0.352296	0.364915	0.999901	-0.507401	0.193418	0.999678	0.23871	0.538572	0.999833	0.0496305	0.901375	0.992475	0.574992	0.141273	0.999973
GPC4	-0.187195	0.775878	0.999916	-0.11931	0.855987	0.999901	-0.253916	0.699449	0.999678	-0.72469	0.272491	0.999833	1.26984	0.065021	0.782693	0.974998	0.141328	0.999973
AK9	0.209485	0.277882	0.999916	0.179261	0.352543	0.999901	0.339247	0.0810725	0.999678	0.216531	0.262188	0.999833	0.204792	0.304339	0.943469	0.284988	0.141419	0.999973
PABPC4	0.15643	0.527245	0.999916	0.187973	0.447748	0.999901	0.100956	0.682991	0.999678	0.0978675	0.692174	0.999833	0.122628	0.631236	0.982702	0.366255	0.141529	0.999973
AL513327.1	-0.110643	0.843863	0.999916	0.215152	0.701846	0.999901	0.0483893	0.931349	0.999678	0.395107	0.482625	0.999833	0.607925	0.296894	0.939203	0.832522	0.141619	0.999973
DIDO1	0.0931701	0.546983	0.999916	0.067722	0.661334	0.999901	-0.0395179	0.798141	0.999678	-0.226116	0.146552	0.999833	-0.228335	0.155767	0.872014	-0.22891	0.141708	0.999973
AC068831.7	0.184314	0.814347	0.999916	0.0561776	0.942931	0.999901	0.109915	0.888616	0.999678	-1.16442	0.141187	0.999833	-1.29072	0.11489	0.847994	-1.16284	0.141716	0.999973
CSNK2A2	0.0879836	0.742235	0.999916	0.214133	0.424398	0.999901	-0.0833782	0.755274	0.999678	-0.202756	0.44931	0.999833	-0.0890619	0.747279	0.991747	-0.39616	0.141794	0.999973
CLK4	-0.000501045	0.997524	0.999916	0.200473	0.217148	0.999901	0.242402	0.136684	0.999678	-0.131354	0.417158	0.999833	-0.0847002	0.612045	0.982165	-0.239168	0.141907	0.999973
AL353150.1	-0.650399	0.403962	0.999916	-1.06154	0.175072	0.999901	-0.785907	0.313839	0.999678	-0.762239	0.328523	0.999833	-1.73655	0.0336073	0.708731	-1.15111	0.141917	0.999973
UBE3D	-0.0850208	0.726025	0.999916	0.0173649	0.942918	0.999901	0.227682	0.349445	0.999678	0.260683	0.284547	0.999833	0.204311	0.416041	0.962742	0.359123	0.141972	0.999973
BMS1	0.0553126	0.622859	0.999916	-0.0569616	0.612551	0.999901	-0.0841214	0.455044	0.999678	0.100584	0.372177	0.999833	0.0130762	0.910326	0.992673	0.166393	0.141975	0.999973
ZC2HC1C	-0.0938763	0.78038	0.999916	-0.13464	0.689327	0.999901	-0.034983	0.917224	0.999678	-0.268312	0.426494	0.999833	-0.344063	0.324313	0.949201	-0.498309	0.142069	0.999973
LINC00472	0.0427805	0.927676	0.999916	-0.107862	0.819011	0.999901	-0.160251	0.733954	0.999678	0.245795	0.602378	0.999833	0.212961	0.6621	0.98556	0.697721	0.142081	0.999973
C6orf52	-0.0718442	0.828252	0.999916	-0.0705131	0.831385	0.999901	-0.0240695	0.94205	0.999678	-0.332741	0.316808	0.999833	-0.471628	0.171117	0.890224	-0.489736	0.142437	0.999973
DIO2	0.852961	0.270512	0.999916	0.634557	0.411383	0.999901	0.535362	0.487951	0.999678	-0.693677	0.36943	0.999833	-1.81394	0.0254346	0.666021	-1.13921	0.142561	0.999973
LINC01508	-0.0226796	0.971448	0.999916	0.00781766	0.990156	0.999901	-0.134382	0.832073	0.999678	0.567939	0.371568	0.999833	0.323101	0.621972	0.982702	0.936814	0.142604	0.999973
PHKG1	0.491149	0.521648	0.999916	-0.0658092	0.931469	0.999901	0.178593	0.815502	0.999678	2.09737	0.00768347	0.769848	2.36548	0.00378975	0.464755	1.13098	0.142739	0.999973
KIF26B	-0.0392456	0.873985	0.999916	-0.11579	0.640088	0.999901	-0.172311	0.486989	0.999678	-0.173121	0.484953	0.999833	0.162297	0.52617	0.971634	0.365647	0.142784	0.999973
C9orf78	-0.00776283	0.952923	0.999916	0.0466054	0.723138	0.999901	0.0217984	0.868344	0.999678	-0.0868726	0.509534	0.999833	-0.275917	0.0455497	0.732036	-0.194239	0.142937	0.999973
AL669831.1	0.444012	0.199004	0.999916	0.390949	0.257418	0.999901	0.373221	0.279416	0.999678	0.0912544	0.79055	0.999833	0.245549	0.489811	0.967221	0.507074	0.143196	0.999973
OPLAH	0.432421	0.627432	0.999916	0.0924147	0.917316	0.999901	0.634011	0.47717	0.999678	0.482941	0.58787	0.999833	1.03201	0.264127	0.927115	-1.31352	0.143359	0.999973
NR1H2	0.0408499	0.786531	0.999916	0.063919	0.671871	0.999901	0.012916	0.931745	0.999678	-0.284189	0.0629723	0.999833	-0.448819	0.00520707	0.499129	-0.222209	0.143909	0.999973
THNSL1	-0.161221	0.350845	0.999916	-0.0720736	0.675799	0.999901	0.0649078	0.706418	0.999678	0.312154	0.073451	0.999833	0.294213	0.101784	0.836854	0.253761	0.143946	0.999973
RPS18	-0.0482602	0.781293	0.999916	0.0580246	0.738558	0.999901	0.158071	0.364545	0.999678	-0.151296	0.385337	0.999833	-0.283721	0.117528	0.849813	-0.256021	0.143983	0.999973
TGIF2	-0.0146962	0.98208	0.999916	0.0338077	0.958791	0.999901	-0.118143	0.856723	0.999678	-0.0289885	0.964661	0.999833	0.485749	0.473299	0.966679	-0.963934	0.143989	0.999973
EN2	-0.430669	0.701944	0.999916	-0.424261	0.706166	0.999901	-0.764403	0.497498	0.999678	1.35398	0.231241	0.999833	0.180154	0.87681	0.991747	1.65657	0.144094	0.999973
LRFN3	-0.0719326	0.808855	0.999916	-0.00243463	0.993466	0.999901	-0.0295861	0.92073	0.999678	-0.22536	0.449434	0.999833	-0.327327	0.288696	0.936188	0.43779	0.144172	0.999973
RAB34	0.0544999	0.915273	0.999916	0.0521482	0.918916	0.999901	-0.0197412	0.969258	0.999678	1.04042	0.0455335	0.999833	0.488917	0.357184	0.957323	0.75425	0.144212	0.999973
NUS1	-0.183762	0.371247	0.999916	-0.17624	0.391031	0.999901	-0.428314	0.0397473	0.999678	0.0964219	0.638199	0.999833	0.417617	0.0518979	0.748343	0.30165	0.144246	0.999973
AC012405.1	0.494511	0.404354	0.999916	0.0230287	0.968941	0.999901	0.445718	0.452068	0.999678	0.0813472	0.89061	0.999833	-0.131305	0.829894	0.991747	-0.870421	0.144406	0.999973
HMMR	0.05905	0.877126	0.999916	0.0458301	0.90448	0.999901	-0.145908	0.702568	0.999678	-0.0188683	0.960594	0.999833	-0.510059	0.198988	0.907019	-0.561966	0.144449	0.999973
CCDC186	0.138076	0.418697	0.999916	0.0569439	0.73822	0.999901	0.304814	0.07704	0.999678	0.307091	0.0749109	0.999833	0.182377	0.301998	0.942	0.250584	0.144505	0.999973
RUSC1-AS1	0.555601	0.26527	0.999916	0.293915	0.554275	0.999901	0.479933	0.335311	0.999678	-1.02499	0.042139	0.999833	-0.566863	0.271245	0.930867	-0.730071	0.14462	0.999973
SHISA3	-1.0273	0.285346	0.999916	-0.0253465	0.978877	0.999901	-0.887505	0.355469	0.999678	-1.50598	0.119143	0.999833	-1.74725	0.0808629	0.811656	-1.40732	0.144838	0.999973
AL445305.1	-0.1246	0.775157	0.999916	0.55754	0.203897	0.999901	0.820178	0.0634917	0.999678	-0.845051	0.0560728	0.999833	-0.881856	0.0537241	0.756635	-0.640678	0.145092	0.999973
PHF21A	0.0524174	0.737578	0.999916	0.0968427	0.536319	0.999901	0.13019	0.406347	0.999678	-0.0891969	0.568885	0.999833	-0.212439	0.19149	0.903349	-0.229719	0.145123	0.999973
CNOT7	-0.0388838	0.694563	0.999916	0.0568671	0.566046	0.999901	-0.0183375	0.853019	0.999678	0.242339	0.0166428	0.922994	0.176486	0.0879077	0.825271	0.145323	0.145292	0.999973
WWP2	0.0150116	0.913482	0.999916	0.128145	0.355264	0.999901	0.177677	0.201294	0.999678	-0.203148	0.14477	0.999833	-0.12717	0.374471	0.958882	-0.202733	0.14558	0.999973
RAPGEF6	-0.0854837	0.793987	0.999916	0.0299296	0.927135	0.999901	0.286425	0.382869	0.999678	0.289212	0.378284	0.999833	0.42934	0.206985	0.912391	0.480133	0.145647	0.999973
CERNA1	-0.149608	0.656031	0.999916	-0.201197	0.549431	0.999901	-0.0573526	0.864336	0.999678	-0.446016	0.186871	0.999833	-0.231687	0.504805	0.96826	-0.491811	0.146136	0.999973
AC078819.1	-0.413825	0.212721	0.999916	-0.297115	0.369568	0.999901	-0.230088	0.486599	0.999678	-0.478889	0.150114	0.999833	-0.389573	0.255733	0.926562	-0.483685	0.146138	0.999973
MTIF2	-0.0567623	0.685775	0.999916	0.148087	0.292942	0.999901	0.0630833	0.653011	0.999678	0.0461635	0.742066	0.999833	-0.0726173	0.616512	0.982626	-0.205357	0.1463	0.999973
PIP4P1	-0.072561	0.581387	0.999916	0.0608674	0.643603	0.999901	0.0369655	0.77861	0.999678	-0.215332	0.104915	0.999833	-0.264218	0.0551404	0.764151	-0.192525	0.146315	0.999973
CYB561A3	0.0869332	0.63359	0.999916	0.0969194	0.595195	0.999901	0.012585	0.944937	0.999678	0.161472	0.376968	0.999833	0.0903109	0.631741	0.982702	0.266822	0.146393	0.999973
AC018521.5	0.110391	0.682913	0.999916	0.227804	0.400234	0.999901	0.0386154	0.886311	0.999678	-0.161037	0.551531	0.999833	-0.45999	0.10278	0.836854	-0.395358	0.146506	0.999973
AC005070.3	-0.545003	0.254033	0.999916	-0.00587956	0.990133	0.999901	0.423329	0.374686	0.999678	-0.867539	0.0715612	0.999833	-0.900815	0.0701951	0.79327	-0.695966	0.146508	0.999973
FKBP3	0.0269191	0.837473	0.999916	0.0306504	0.815336	0.999901	0.00553777	0.966335	0.999678	0.215141	0.104601	0.999833	0.0395679	0.770462	0.991747	0.192075	0.146523	0.999973
FP671120.5	0.138877	0.743201	0.999916	-0.0501878	0.905721	0.999901	0.486709	0.253109	0.999678	0.685445	0.109243	0.999833	0.280358	0.522584	0.971495	0.620261	0.146534	0.999973
MORF4L1P1	0.0231625	0.891977	0.999916	0.00966709	0.954798	0.999901	0.0825241	0.628783	0.999678	-0.260693	0.129775	0.999833	-0.344344	0.0540896	0.757572	-0.249539	0.146713	0.999973
PLCD4	-0.121706	0.856455	0.999916	0.0566836	0.932853	0.999901	-0.256199	0.703487	0.999678	-0.581841	0.388469	0.999833	0.200938	0.772586	0.991747	-0.984151	0.146783	0.999973
SUB1P3	0.350762	0.368838	0.999916	0.427568	0.274054	0.999901	0.642088	0.102436	0.999678	-0.260814	0.503407	0.999833	-1.16799	0.00485614	0.499129	-0.569141	0.146836	0.999973
PIN4P1	0.113077	0.786262	0.999916	0.104817	0.801528	0.999901	0.337172	0.419807	0.999678	-0.523935	0.211592	0.999833	-0.619446	0.153636	0.87182	-0.609253	0.14718	0.999973
MAP3K2-DT	0.0746698	0.84525	0.999916	-0.0772114	0.840054	0.999901	-0.0265132	0.944741	0.999678	0.0322507	0.932809	0.999833	0.459153	0.247771	0.922116	0.558923	0.147247	0.999973
MIS12	0.0840075	0.456178	0.999916	0.13638	0.228013	0.999901	0.0463153	0.680751	0.999678	0.100062	0.375204	0.999833	0.00439998	0.969803	0.997489	-0.164337	0.147348	0.999973
AC022211.2	-0.362229	0.356078	0.999916	0.082801	0.832406	0.999901	-0.185588	0.635513	0.999678	0.184967	0.636643	0.999833	0.873595	0.0337031	0.708731	0.571347	0.14745	0.999973
CYP39A1	-0.174638	0.806025	0.999916	-0.0871553	0.902448	0.999901	0.148245	0.834871	0.999678	1.27844	0.0757195	0.999833	0.922689	0.211887	0.914811	1.03798	0.14762	0.999973
HEATR3	-0.252222	0.452694	0.999916	-0.321935	0.338481	0.999901	-0.499557	0.139418	0.999678	0.159639	0.634139	0.999833	0.473953	0.17417	0.893682	0.489173	0.14769	0.999973
ZNF22	0.0286926	0.87734	0.999916	-0.0270707	0.884222	0.999901	0.151785	0.415386	0.999678	0.201182	0.281291	0.999833	0.12824	0.50505	0.96826	0.271253	0.147781	0.999973
ZNF808	0.0320128	0.877644	0.999916	0.0264207	0.898887	0.999901	0.135715	0.514614	0.999678	-0.000506269	0.998057	0.999833	0.310565	0.151517	0.868419	0.303396	0.147785	0.999973
ZC3H12B	0.419503	0.212815	0.999916	0.5385	0.11113	0.999901	0.321804	0.338025	0.999678	-0.10567	0.752306	0.999833	-0.080271	0.816478	0.991747	-0.488381	0.147796	0.999973
AL035681.1	0.716064	0.36357	0.999916	0.117491	0.881124	0.999901	0.586542	0.45626	0.999678	-0.0467223	0.952575	0.999833	0.518649	0.52349	0.971634	-1.14612	0.147868	0.999973
MAEA	-0.0399438	0.765461	0.999916	0.000790802	0.995286	0.999901	0.0393237	0.768995	0.999678	-0.134328	0.317465	0.999833	-0.208317	0.135357	0.85895	-0.195197	0.148035	0.999973
PPP2R3C	0.0771425	0.568558	0.999916	0.121589	0.369709	0.999901	0.0454812	0.736541	0.999678	0.345774	0.0125142	0.887814	0.351605	0.0139092	0.598929	0.19696	0.148229	0.999973
ELOA-AS1	-0.246994	0.434434	0.999916	-0.199871	0.526721	0.999901	-0.181227	0.565879	0.999678	0.553332	0.0827816	0.999833	0.0443072	0.891807	0.992475	0.459362	0.148362	0.999973
OMA1	0.109602	0.691951	0.999916	0.173402	0.531137	0.999901	0.184223	0.505907	0.999678	-0.0832294	0.763452	0.999833	-0.308393	0.282453	0.934908	-0.402826	0.14837	0.999973
MKX	-0.359587	0.471226	0.999916	-0.140325	0.778218	0.999901	-0.482061	0.334876	0.999678	0.397413	0.426079	0.999833	0.196327	0.702997	0.989116	0.725497	0.148515	0.999973
SLC2A11	0.0559064	0.813694	0.999916	-0.161258	0.497336	0.999901	-0.0740584	0.754943	0.999678	-0.178321	0.453133	0.999833	-0.189029	0.441538	0.966679	-0.345447	0.148539	0.999973
SYTL1	-0.415863	0.563478	0.999916	-0.506087	0.482318	0.999901	-0.494436	0.492421	0.999678	0.92179	0.202637	0.999833	1.36622	0.069407	0.791928	1.04708	0.148562	0.999973
DNAL4	-0.00871606	0.950219	0.999916	0.140712	0.315392	0.999901	0.0349725	0.802243	0.999678	-0.07561	0.588525	0.999833	-0.21924	0.131921	0.854988	-0.20332	0.14857	0.999973
FKBP1C	-0.272579	0.414659	0.999916	-0.146989	0.659441	0.999901	0.118866	0.721492	0.999678	-0.401619	0.230802	0.999833	-0.593136	0.0885528	0.826336	-0.485365	0.148598	0.999973
FAM129A	-0.228778	0.756095	0.999916	0.13538	0.85413	0.999901	0.0401947	0.956463	0.999678	-0.981789	0.185363	0.999833	-1.69533	0.0287134	0.6877	-1.07211	0.148628	0.999973
KATNAL1	0.0325928	0.832615	0.999916	0.0181417	0.906341	0.999901	-0.000910959	0.995286	0.999678	-0.123887	0.422849	0.999833	0.0489768	0.758597	0.991747	-0.224486	0.148688	0.999973
AC108704.2	0.0609776	0.90222	0.999916	0.527052	0.290343	0.999901	-0.638999	0.200767	0.999678	-1.20487	0.0175568	0.93194	-1.24523	0.0175269	0.605677	-0.722442	0.148763	0.999973
SEMA3B	0.302563	0.718015	0.999916	-0.105934	0.899345	0.999901	-0.0775212	0.926248	0.999678	-0.645012	0.442216	0.999833	-1.12206	0.197583	0.905743	-1.21864	0.148892	0.999973
LTBP1	0.0809052	0.868606	0.999916	0.0612493	0.90033	0.999901	-0.15743	0.747598	0.999678	0.0353182	0.942425	0.999833	0.494991	0.329025	0.953023	0.711285	0.14907	0.999973
MAIP1	-0.231257	0.121004	0.999916	0.045853	0.756397	0.999901	-0.077684	0.599444	0.999678	0.0657425	0.656607	0.999833	0.216317	0.159688	0.874943	0.214909	0.149085	0.999973
POU3F4	0.213908	0.790368	0.999916	0.0278231	0.97241	0.999901	0.0649001	0.935701	0.999678	-0.637258	0.429382	0.999833	-0.803929	0.335171	0.955625	-1.16988	0.149148	0.999973
VPS53	0.0886501	0.495796	0.999916	0.00188843	0.988403	0.999901	0.0821166	0.527988	0.999678	-0.141055	0.279787	0.999833	-0.355418	0.00988771	0.561977	-0.18891	0.149206	0.999973
CRKL	0.0181853	0.885626	0.999916	0.0473441	0.708176	0.999901	-0.0127164	0.919877	0.999678	-0.141225	0.266228	0.999833	-0.067934	0.603366	0.981746	-0.183623	0.149626	0.999973
FILIP1L	0.123453	0.759055	0.999916	0.168803	0.675025	0.999901	0.0308345	0.938914	0.999678	0.0238643	0.952703	0.999833	0.101759	0.806667	0.991747	0.584077	0.149858	0.999973
STPG1	0.0413496	0.860867	0.999916	0.118718	0.615116	0.999901	0.274352	0.247265	0.999678	0.0944713	0.68898	0.999833	0.104622	0.667953	0.985855	0.342435	0.149862	0.999973
GRAMD2B	-0.00967852	0.991537	0.999916	-0.110996	0.903187	0.999901	-0.093403	0.918472	0.999678	1.09083	0.234466	0.999833	2.52508	0.00910578	0.560684	1.32421	0.149979	0.999973
FLYWCH1	-0.188659	0.22566	0.999916	-0.173328	0.265219	0.999901	-0.113579	0.464119	0.999678	-0.298409	0.0573685	0.999833	-0.154573	0.335636	0.955627	-0.224593	0.150148	0.999973
TRMT10B	0.0895246	0.645894	0.999916	0.0940957	0.629171	0.999901	0.210556	0.281621	0.999678	-0.412193	0.0373613	0.999833	-0.179804	0.372854	0.958882	-0.28233	0.150265	0.999973
COL18A1	-0.004657	0.993172	0.999916	-0.232223	0.669792	0.999901	-0.495415	0.364156	0.999678	-0.249245	0.647209	0.999833	-0.0860746	0.878341	0.991747	0.789127	0.150295	0.999973
ERP44	-0.0762165	0.581623	0.999916	0.0175849	0.898724	0.999901	0.10767	0.436862	0.999678	0.278429	0.047188	0.999833	0.200964	0.162352	0.882355	0.200258	0.150466	0.999973
ULBP1	-0.324959	0.562211	0.999916	0.226716	0.685759	0.999901	0.193374	0.729966	0.999678	0.131492	0.814386	0.999833	0.153431	0.790917	0.991747	-0.811536	0.150531	0.999973
RBBP8	-0.142174	0.4496	0.999916	0.0408439	0.827701	0.999901	-0.0462581	0.805304	0.999678	0.326756	0.0851462	0.999833	0.16845	0.38626	0.958882	0.271752	0.150771	0.999973
ZMAT2	0.0441949	0.727501	0.999916	0.0473896	0.708691	0.999901	-0.0143208	0.910063	0.999678	-0.0257971	0.838776	0.999833	0.0362684	0.781924	0.991747	-0.183542	0.150932	0.999973
YBX1P2	-0.162532	0.700703	0.999916	-0.850041	0.0476023	0.999901	-0.482376	0.256071	0.999678	-0.867281	0.0433994	0.999833	-0.964598	0.0300856	0.699056	-0.611846	0.150938	0.999973
MYO10	0.112536	0.731178	0.999916	0.216987	0.508221	0.999901	0.111654	0.733203	0.999678	-0.492555	0.135846	0.999833	-0.668073	0.0516591	0.747472	-0.474017	0.150942	0.999973
CENPS	-0.0845167	0.805597	0.999916	-0.213133	0.53535	0.999901	-0.331838	0.335518	0.999678	0.0655853	0.848525	0.999833	-0.806453	0.0257643	0.666021	-0.496892	0.15108	0.999973
EEF1B2P3	0.027955	0.911289	0.999916	-0.0249452	0.920806	0.999901	0.168803	0.501834	0.999678	-0.335687	0.183925	0.999833	-0.535204	0.0421939	0.721684	-0.363056	0.151158	0.999973
PEPD	-0.159723	0.374482	0.999916	-0.0697839	0.69729	0.999901	-0.0802683	0.654631	0.999678	-0.163967	0.362001	0.999833	-0.264339	0.156819	0.872053	-0.259198	0.151535	0.999973
FAF2	0.0358233	0.764448	0.999916	0.0245992	0.836948	0.999901	0.0242649	0.839133	0.999678	-0.0394556	0.741397	0.999833	0.0179312	0.88455	0.991875	-0.172762	0.151552	0.999973
IP6K2	0.0203749	0.876657	0.999916	-0.0198203	0.879988	0.999901	-0.00360189	0.978109	0.999678	-0.123768	0.347383	0.999833	-0.213761	0.118456	0.850181	-0.189749	0.151554	0.999973
ZNF577	0.117696	0.601842	0.999916	0.0281317	0.900655	0.999901	0.112608	0.617608	0.999678	0.486109	0.0340262	0.999833	0.522892	0.0275436	0.678786	0.325477	0.151886	0.999973
RPS11	0.00921241	0.959872	0.999916	0.117583	0.521407	0.999901	0.211162	0.25121	0.999678	-0.168708	0.358402	0.999833	-0.393744	0.0405956	0.718265	-0.264457	0.151888	0.999973
KCTD11	0.00319336	0.985728	0.999916	-0.0203421	0.909279	0.999901	-0.197165	0.271627	0.999678	-0.0910041	0.610555	0.999833	-0.173008	0.349871	0.957031	-0.257815	0.151923	0.999973
YWHAEP1	-0.593693	0.0709429	0.999916	0.173523	0.59337	0.999901	-0.26761	0.410944	0.999678	-0.823727	0.0132337	0.901248	-0.292737	0.384165	0.958882	-0.468756	0.151983	0.999973
GCKR	0.754966	0.354967	0.999916	0.289293	0.722251	0.999901	0.43695	0.591585	0.999678	1.59883	0.0527554	0.999833	-0.561739	0.50465	0.96826	-1.17439	0.152087	0.999973
ZNF581	-0.0820436	0.659988	0.999916	0.0385512	0.836136	0.999901	0.0141001	0.939688	0.999678	-0.0335157	0.857287	0.999833	-0.350462	0.0722658	0.798048	-0.268994	0.152142	0.999973
NOB1	-0.0973496	0.554391	0.999916	0.0657779	0.689336	0.999901	0.0339231	0.83659	0.999678	-0.0649609	0.692993	0.999833	0.0702813	0.67933	0.987662	-0.237352	0.15217	0.999973
AC078846.1	0.121736	0.651012	0.999916	-0.103088	0.70161	0.999901	0.262246	0.33121	0.999678	0.163364	0.54408	0.999833	0.253326	0.363416	0.958022	0.388059	0.152238	0.999973
CDK14	0.00708769	0.980191	0.999916	-0.174722	0.541069	0.999901	-0.329062	0.251426	0.999678	0.117002	0.682089	0.999833	0.422743	0.154991	0.871913	0.411922	0.152261	0.999973
KCTD1	-0.314656	0.16297	0.999916	-0.204538	0.362376	0.999901	-0.205112	0.361037	0.999678	0.0478918	0.830608	0.999833	0.0898838	0.697701	0.988974	0.322973	0.152299	0.999973
MIER2	0.119196	0.595212	0.999916	0.0711642	0.75092	0.999901	0.0317104	0.887485	0.999678	-0.536091	0.0192064	0.958772	-0.417476	0.0749339	0.803652	-0.32323	0.152461	0.999973
AC008915.2	0.293443	0.485614	0.999916	-0.0967882	0.817795	0.999901	0.217912	0.60428	0.999678	-0.224922	0.592725	0.999833	-0.533384	0.221732	0.91692	-0.60581	0.152471	0.999973
LBHD1	0.341978	0.503238	0.999916	0.518637	0.311095	0.999901	0.370612	0.468309	0.999678	0.52717	0.303264	0.999833	-0.222248	0.673393	0.986735	0.73554	0.152472	0.999973
SPINK5	0.00597647	0.993746	0.999916	-0.221871	0.771116	0.999901	-0.059453	0.937846	0.999678	-1.00125	0.192029	0.999833	-0.902661	0.254235	0.925991	-1.09951	0.152512	0.999973
SMOC1	0.0383392	0.961838	0.999916	-0.460845	0.565697	0.999901	-0.128792	0.872317	0.999678	-0.697666	0.385315	0.999833	1.90845	0.0238392	0.659009	-1.15525	0.152622	0.999973
UBC	-0.126892	0.445989	0.999916	0.00073887	0.996451	0.999901	0.0376468	0.820756	0.999678	-0.268361	0.109725	0.999833	-0.271206	0.117562	0.849813	-0.239468	0.152692	0.999973
AC073896.2	0.197231	0.63056	0.999916	-0.0709183	0.8626	0.999901	-0.0347245	0.932462	0.999678	0.404992	0.324758	0.999833	0.506532	0.234061	0.91692	0.590527	0.152758	0.999973
DIRC3	-0.264817	0.678074	0.999916	-0.241595	0.704884	0.999901	-0.614922	0.33652	0.999678	0.500148	0.433845	0.999833	0.273861	0.677798	0.987531	0.918535	0.152905	0.999973
PA2G4P4	-0.108838	0.777719	0.999916	0.266973	0.489328	0.999901	0.0206947	0.957181	0.999678	-0.913789	0.0202616	0.958772	-0.751875	0.062505	0.781405	-0.555263	0.152937	0.999973
LINC01578	-0.140468	0.881389	0.999916	-0.811682	0.389902	0.999901	-1.03648	0.273099	0.999678	0.76472	0.417762	0.999833	1.56046	0.112118	0.845916	1.35595	0.152986	0.999973
MFNG	-0.174427	0.807022	0.999916	-0.149772	0.833859	0.999901	0.289775	0.685008	0.999678	2.24822	0.00238761	0.612145	0.162459	0.825711	0.991747	1.02811	0.153084	0.999973
CMBL	0.00631213	0.98793	0.999916	0.029461	0.943713	0.999901	-0.0517485	0.901306	0.999678	-0.0272448	0.94794	0.999833	-0.408532	0.344999	0.956785	0.600671	0.153237	0.999973
NEK10	-0.199994	0.511682	0.999916	-0.306431	0.315757	0.999901	-0.126854	0.676935	0.999678	0.149008	0.624638	0.999833	-0.105254	0.737873	0.991747	0.437991	0.153243	0.999973
HDGFL3	-0.128882	0.520533	0.999916	-0.115877	0.563352	0.999901	-0.212116	0.291604	0.999678	0.181426	0.366493	0.999833	0.207957	0.316767	0.946666	0.288253	0.153294	0.999973
C1orf174	-0.0765277	0.630021	0.999916	-0.0762161	0.631413	0.999901	0.00877826	0.955897	0.999678	-0.199197	0.212253	0.999833	-0.147868	0.368753	0.958607	-0.228427	0.153364	0.999973
AC012306.2	-0.190319	0.401282	0.999916	-0.517046	0.0249562	0.999901	-0.301889	0.184862	0.999678	-0.0493518	0.82727	0.999833	0.152148	0.515603	0.970572	0.325313	0.153506	0.999973
TDO2	0.0877905	0.926644	0.999916	0.155498	0.870469	0.999901	-0.285336	0.764829	0.999678	0.294235	0.757725	0.999833	-0.30722	0.755248	0.991747	-1.37126	0.15364	0.999973
PRCD	-0.00210205	0.995085	0.999916	0.199083	0.560114	0.999901	0.396379	0.247831	0.999678	0.616175	0.0744949	0.999833	0.435368	0.219565	0.91692	0.490657	0.153693	0.999973
UBIAD1	0.0487619	0.732444	0.999916	0.064075	0.653366	0.999901	0.079661	0.576781	0.999678	0.0133621	0.925329	0.999833	-0.0508668	0.729968	0.991747	-0.204963	0.153766	0.999973
FANCC	0.231547	0.162809	0.999916	0.156082	0.344822	0.999901	-0.0456405	0.781693	0.999678	-0.162884	0.324354	0.999833	-0.0743105	0.66248	0.985704	-0.236683	0.15382	0.999973
AC107075.1	-0.210797	0.546639	0.999916	-0.168256	0.630233	0.999901	0.361014	0.303205	0.999678	-0.242344	0.488495	0.999833	-0.808656	0.0278493	0.681462	-0.501945	0.153841	0.999973
THBS3	-0.120288	0.689976	0.999916	-0.0452897	0.880556	0.999901	-0.0451719	0.880864	0.999678	0.349154	0.249081	0.999833	0.41034	0.190514	0.902558	0.433177	0.15386	0.999973
PAUPAR	-0.524834	0.518077	0.999916	-0.0509747	0.949867	0.999901	-0.088063	0.913506	0.999678	0.0889408	0.912648	0.999833	-0.296883	0.723152	0.990749	-1.16521	0.153891	0.999973
RAB7A	-0.185743	0.0525285	0.999916	0.0077181	0.934848	0.999901	-0.0189498	0.840947	0.999678	-0.0324585	0.731118	0.999833	-0.0718423	0.462373	0.966679	-0.135667	0.153966	0.999973
RRAGC	-0.253406	0.40556	0.999916	0.084111	0.781988	0.999901	0.122407	0.687249	0.999678	0.232947	0.444333	0.999833	-0.0320782	0.91862	0.992977	0.436617	0.15398	0.999973
TEF	-0.0107474	0.965446	0.999916	-0.0998837	0.687414	0.999901	0.21019	0.398162	0.999678	0.0135233	0.956529	0.999833	-0.0164435	0.94885	0.995108	0.356374	0.154097	0.999973
PPP4C	0.00655963	0.96668	0.999916	0.0125522	0.936291	0.999901	-0.0213113	0.892055	0.999678	-0.175254	0.26669	0.999833	-0.275785	0.0927239	0.826336	-0.225571	0.154106	0.999973
TCHP	0.107762	0.576982	0.999916	-0.148058	0.44394	0.999901	0.0674659	0.726735	0.999678	-0.347942	0.0749031	0.999833	-0.62915	0.00234124	0.421746	-0.277079	0.154256	0.999973
HIF3A	0.211079	0.66876	0.999916	0.561378	0.257197	0.999901	0.976294	0.0510371	0.999678	0.0276559	0.955265	0.999833	0.344708	0.499336	0.967675	0.707649	0.154409	0.999973
ANGEL1	0.00968417	0.959806	0.999916	-0.195482	0.310939	0.999901	-0.165378	0.390792	0.999678	0.11584	0.54718	0.999833	0.245049	0.219799	0.91692	0.275733	0.154543	0.999973
RPS4XP6	0.0882521	0.862085	0.999916	-0.508217	0.318923	0.999901	0.0459971	0.927849	0.999678	-0.763736	0.136059	0.999833	-1.5812	0.00356601	0.45808	-0.728832	0.154566	0.999973
SERPINB6	-0.0191529	0.921921	0.999916	0.0128701	0.947486	0.999901	-0.15604	0.425683	0.999678	-0.276214	0.160674	0.999833	-0.111507	0.581178	0.981723	-0.280368	0.154568	0.999973
AL669831.5	0.297691	0.468318	0.999916	0.0690477	0.866162	0.999901	-0.0803571	0.844507	0.999678	-0.303053	0.460377	0.999833	-0.0916682	0.828566	0.991747	-0.587635	0.154667	0.999973
RACK1	-0.134421	0.430212	0.999916	0.0424444	0.802881	0.999901	0.0838192	0.622292	0.999678	-0.168657	0.32297	0.999833	-0.325446	0.06741	0.786126	-0.24369	0.154943	0.999973
RRN3P1	0.15282	0.539681	0.999916	0.0166323	0.946705	0.999901	0.39153	0.119048	0.999678	0.068856	0.782046	0.999833	0.178663	0.487884	0.966679	0.356579	0.155057	0.999973
IGFBP3	-0.705705	0.489256	0.999916	-0.713974	0.484199	0.999901	-1.39144	0.17503	0.999678	1.08906	0.287142	0.999833	0.775352	0.462255	0.966679	1.45985	0.155059	0.999973
DNAJC13	-0.0392785	0.833206	0.999916	-0.0798838	0.668604	0.999901	-0.0866771	0.642354	0.999678	0.284658	0.130298	0.999833	0.512874	0.0095204	0.561977	0.267203	0.155131	0.999973
LIMD1	-0.295478	0.551292	0.999916	-0.35828	0.470295	0.999901	-0.271004	0.584658	0.999678	-0.522841	0.293152	0.999833	-0.105497	0.836678	0.991747	-0.709393	0.155245	0.999973
AC068620.1	0.0193383	0.966141	0.999916	-0.320328	0.482802	0.999901	-0.308387	0.499208	0.999678	0.268939	0.555495	0.999833	0.924204	0.0529831	0.754552	0.652477	0.155305	0.999973
FAM184A	-0.323236	0.446771	0.999916	-0.322852	0.447308	0.999901	-0.555714	0.192804	0.999678	0.41025	0.334895	0.999833	0.57162	0.194761	0.903971	0.607103	0.155325	0.999973
AC026329.1	0.564292	0.468494	0.999916	0.0771206	0.920921	0.999901	0.659799	0.396998	0.999678	0.0088332	0.990928	0.999833	-0.0854501	0.915218	0.992977	-1.11253	0.155327	0.999973
GPD1	0.498207	0.570029	0.999916	0.338504	0.699356	0.999901	0.624967	0.476453	0.999678	-0.749992	0.393259	0.999833	-0.124808	0.890333	0.992475	-1.25408	0.155493	0.999973
AL049838.1	0.168557	0.652657	0.999916	-0.00581948	0.987593	0.999901	0.279524	0.456059	0.999678	0.190467	0.611126	0.999833	-0.304008	0.432806	0.966041	0.535561	0.155613	0.999973
GNB1L	-0.0169551	0.939553	0.999916	0.215275	0.337357	0.999901	0.212442	0.343708	0.999678	-0.352318	0.118545	0.999833	-0.48441	0.0391657	0.717742	-0.319675	0.156006	0.999973
RFLNA	-0.0182318	0.969322	0.999916	-0.333577	0.482475	0.999901	-0.383475	0.41973	0.999678	0.489711	0.303575	0.999833	0.783767	0.113048	0.846662	0.677631	0.1561	0.999973
AC016716.1	0.0436873	0.895581	0.999916	0.240777	0.470335	0.999901	0.563908	0.0937765	0.999678	-0.716993	0.0342737	0.999833	-0.099488	0.772427	0.991747	-0.475753	0.156123	0.999973
FUNDC2P1	0.323557	0.407722	0.999916	0.413696	0.290612	0.999901	0.366702	0.348449	0.999678	-0.649043	0.0994181	0.999833	-0.951639	0.0206597	0.628141	-0.557073	0.156165	0.999973
RPS2P5	-0.0706319	0.813122	0.999916	-0.0384126	0.897687	0.999901	-0.00763748	0.979602	0.999678	-0.491402	0.103488	0.999833	-0.580456	0.0635018	0.781878	-0.426895	0.156197	0.999973
GOLGA2P7	0.413215	0.385226	0.999916	0.454249	0.340106	0.999901	0.481081	0.312556	0.999678	-0.278227	0.558154	0.999833	0.373017	0.447754	0.966679	0.677823	0.156365	0.999973
CBX8	-0.256666	0.218635	0.999916	-0.182381	0.38067	0.999901	-0.251453	0.228024	0.999678	-0.146488	0.480887	0.999833	-0.31041	0.150761	0.868302	-0.296292	0.15638	0.999973
AL353807.5	-0.0601076	0.948714	0.999916	-0.344053	0.712881	0.999901	0.485259	0.603935	0.999678	-1.92359	0.0427818	0.999833	-2.34864	0.0173417	0.605677	-1.33481	0.156392	0.999973
CDC5L	-0.00409009	0.964909	0.999916	0.0908744	0.330109	0.999901	0.0766665	0.410794	0.999678	0.21003	0.0266708	0.977525	0.0222535	0.816828	0.991747	0.132762	0.156498	0.999973
ZNF814	0.233042	0.269538	0.999916	0.171917	0.414343	0.999901	0.27007	0.201424	0.999678	0.163758	0.436735	0.999833	-0.21867	0.315592	0.946626	0.299985	0.156501	0.999973
S100B	-0.0685629	0.872912	0.999916	-0.217002	0.612981	0.999901	-0.0871241	0.838938	0.999678	-0.127851	0.765543	0.999833	0.37689	0.396023	0.960725	0.611708	0.156717	0.999973
NCAPH	0.0820545	0.854856	0.999916	-0.0461611	0.918029	0.999901	-0.227083	0.612993	0.999678	0.479668	0.286976	0.999833	1.24564	0.00887095	0.555746	0.640043	0.156784	0.999973
NUDT16	0.0585978	0.716377	0.999916	0.0757316	0.638803	0.999901	0.0141501	0.930057	0.999678	-0.153432	0.342903	0.999833	-0.21335	0.203066	0.910048	-0.230044	0.156799	0.999973
NR4A1	-0.426776	0.342787	0.999916	-0.102517	0.819153	0.999901	0.0336225	0.940216	0.999678	0.155818	0.728281	0.999833	0.514169	0.269237	0.929266	0.639484	0.156949	0.999973
CHML	-0.186497	0.674335	0.999916	-0.364982	0.411774	0.999901	-0.540867	0.225302	0.999678	0.318937	0.47296	0.999833	0.711776	0.123801	0.851276	0.632606	0.156988	0.999973
PDGFB	-0.441898	0.376557	0.999916	-0.0966296	0.846239	0.999901	-0.336436	0.50026	0.999678	0.7154	0.154268	0.999833	1.04483	0.0456767	0.732036	0.710372	0.157139	0.999973
PRLR	-1.05043	0.143027	0.999916	-0.570199	0.423885	0.999901	-0.697133	0.328802	0.999678	0.0728456	0.918427	0.999833	0.764908	0.29995	0.941786	1.01406	0.157159	0.999973
RASSF3	0.112374	0.877497	0.999916	-0.507291	0.487298	0.999901	-0.995565	0.175094	0.999678	0.537069	0.462205	0.999833	0.0712016	0.924686	0.993596	-1.03899	0.157281	0.999973
MCEE	0.0751023	0.713264	0.999916	0.0359734	0.860224	0.999901	-0.063742	0.755089	0.999678	0.233804	0.254764	0.999833	0.068275	0.746415	0.991747	0.291118	0.157316	0.999973
ACOT11	-0.0104212	0.990834	0.999916	-0.450739	0.619613	0.999901	-0.64673	0.476759	0.999678	0.655325	0.470945	0.999833	0.447917	0.633029	0.982702	1.29256	0.157412	0.999973
EBLN2	0.585421	0.228508	0.999916	0.589585	0.225252	0.999901	0.359807	0.457656	0.999678	-0.369114	0.446156	0.999833	-0.694453	0.167547	0.886873	-0.688666	0.157489	0.999973
AC008429.2	0.00244022	0.993872	0.999916	-0.222211	0.485149	0.999901	-0.25217	0.428519	0.999678	-0.87142	0.00764556	0.769848	-0.643503	0.053371	0.756635	-0.452637	0.15749	0.999973
TPD52L2	0.0518004	0.614157	0.999916	0.110381	0.284364	0.999901	0.151784	0.142543	0.999678	-0.0375394	0.714721	0.999833	-0.0619688	0.559536	0.979275	-0.146226	0.157499	0.999973
RNF217	-0.334146	0.344354	0.999916	-0.443453	0.2107	0.999901	-0.616308	0.0836511	0.999678	0.328719	0.352194	0.999833	0.543248	0.138761	0.85895	0.501635	0.157512	0.999973
LAMB2	-0.0183299	0.974412	0.999916	-0.0559564	0.922001	0.999901	-0.14145	0.804552	0.999678	0.307065	0.591457	0.999833	-0.474481	0.422788	0.964185	0.813569	0.15776	0.999973
SCAF8	0.159776	0.332619	0.999916	0.224532	0.174861	0.999901	0.0894556	0.58658	0.999678	-0.0428318	0.794398	0.999833	0.215814	0.206459	0.911844	0.233897	0.157805	0.999973
AHR	-0.194395	0.689766	0.999916	-0.265515	0.585807	0.999901	-0.606266	0.215609	0.999678	-1.01851	0.0395479	0.999833	-0.700321	0.166855	0.886836	-0.692303	0.1581	0.999973
AC002480.1	0.278701	0.649087	0.999916	0.381412	0.533752	0.999901	0.221948	0.716996	0.999678	-0.944509	0.126178	0.999833	-1.22634	0.0558761	0.764564	-0.870421	0.158158	0.999973
LBX1	0.297374	0.81595	0.999916	-0.289301	0.820859	0.999901	-0.544749	0.669986	0.999678	0.24678	0.846827	0.999833	0.0105308	0.993634	0.99984	1.81528	0.158485	0.999973
NPRL3	0.158448	0.425807	0.999916	0.0747755	0.706506	0.999901	0.0590699	0.766066	0.999678	-0.479702	0.0180401	0.935263	-0.593643	0.00500066	0.499129	-0.281964	0.158611	0.999973
AC069218.1	-0.427649	0.317364	0.999916	0.120014	0.778242	0.999901	0.0427595	0.920058	0.999678	-0.315477	0.459954	0.999833	-0.99949	0.0259419	0.666021	-0.605262	0.158616	0.999973
AC027313.1	0.213475	0.677147	0.999916	-0.0383512	0.940335	0.999901	0.164507	0.748255	0.999678	-1.01045	0.0519806	0.999833	-0.394912	0.456651	0.966679	-0.727768	0.158699	0.999973
CLCF1	-1.28495	0.147842	0.999916	-0.655724	0.457504	0.999901	-0.154032	0.861176	0.999678	-0.601522	0.495378	0.999833	0.0214345	0.981207	0.998784	-1.25091	0.158703	0.999973
DNAJA3	0.0388245	0.775268	0.999916	0.126758	0.352746	0.999901	0.0560388	0.680388	0.999678	-0.111467	0.413476	0.999833	-0.0621378	0.65846	0.985219	-0.193037	0.158832	0.999973
CTR9	0.010776	0.920564	0.999916	0.068447	0.527085	0.999901	0.0371793	0.730907	0.999678	-0.00725632	0.94646	0.999833	0.0290514	0.794751	0.991747	-0.153427	0.158842	0.999973
RPL7A	-0.00795134	0.96522	0.999916	0.0943139	0.605388	0.999901	0.134305	0.46236	0.999678	-0.125632	0.491651	0.999833	-0.278771	0.142304	0.864407	-0.258914	0.158856	0.999973
SMO	-0.0537124	0.946256	0.999916	-0.125818	0.874543	0.999901	-0.63923	0.423559	0.999678	-0.0381514	0.961811	0.999833	1.05097	0.204569	0.911318	1.13098	0.158978	0.999973
AC005332.4	-0.0566974	0.899091	0.999916	-0.258301	0.563934	0.999901	-0.418428	0.350943	0.999678	0.340642	0.447121	0.999833	0.431919	0.351392	0.957323	0.634404	0.159099	0.999973
SERBP1P1	0.114174	0.754012	0.999916	0.0904157	0.803993	0.999901	0.0718404	0.843661	0.999678	-0.639339	0.0827573	0.999833	-0.588315	0.121424	0.851276	-0.516755	0.159162	0.999973
AUP1	-0.044289	0.709676	0.999916	0.0831826	0.485	0.999901	0.00624937	0.958083	0.999678	-0.108726	0.362035	0.999833	-0.10677	0.386165	0.958882	-0.168666	0.159226	0.999973
PROB1	-0.0813402	0.932952	0.999916	-0.114637	0.905618	0.999901	-0.588569	0.543249	0.999678	-0.729215	0.451691	0.999833	-1.04624	0.296964	0.939203	-1.37141	0.159244	0.999973
CPLANE1	0.193477	0.237966	0.999916	0.0564452	0.729353	0.999901	0.223683	0.173238	0.999678	0.253655	0.123262	0.999833	0.00909744	0.956939	0.995261	0.231239	0.159371	0.999973
IPO13	0.0899452	0.520807	0.999916	0.103475	0.460328	0.999901	-0.0206702	0.882513	0.999678	-0.385074	0.00742328	0.761809	-0.16676	0.250906	0.924729	-0.198227	0.159571	0.999973
ALKBH6	0.124082	0.837501	0.999916	-0.121923	0.840289	0.999901	-0.40899	0.499726	0.999678	-0.202668	0.737707	0.999833	-0.0235685	0.96992	0.997489	0.857351	0.159588	0.999973
DNPEP	-0.293476	0.100997	0.999916	-0.0876704	0.620872	0.999901	-0.134703	0.447862	0.999678	-0.125104	0.480739	0.999833	-0.200037	0.276463	0.931027	-0.250939	0.159656	0.999973
SNCAIP	0.260156	0.472975	0.999916	0.0793668	0.826391	0.999901	0.0397796	0.912451	0.999678	0.172272	0.634254	0.999833	0.420291	0.26318	0.927115	0.512641	0.15969	0.999973
VAV3	-0.337895	0.593364	0.999916	-1.06561	0.0953794	0.999901	-0.875209	0.169294	0.999678	0.309694	0.624496	0.999833	0.964126	0.143195	0.865354	0.895206	0.1599	0.999973
ASRGL1	0.0952146	0.498087	0.999916	0.071291	0.611684	0.999901	-0.0176386	0.89995	0.999678	0.209371	0.13893	0.999833	0.188977	0.195216	0.903971	0.19866	0.159943	0.999973
SPSB2	0.139063	0.670442	0.999916	0.24852	0.447662	0.999901	0.243065	0.457649	0.999678	0.0394472	0.903859	0.999833	0.239318	0.479004	0.966679	0.462204	0.160154	0.999973
MYBL2	-0.259521	0.787879	0.999916	-0.430729	0.655343	0.999901	-0.955612	0.323498	0.999678	-1.01573	0.294224	0.999833	0.351105	0.724653	0.991517	-1.36413	0.160347	0.999973
PPP1R12A-AS1	0.0706424	0.859912	0.999916	0.0191751	0.961787	0.999901	0.430093	0.284679	0.999678	-0.0979272	0.806747	0.999833	-0.166842	0.686788	0.987662	-0.566173	0.160364	0.999973
TCEANC	0.313059	0.0962677	0.999916	0.265228	0.157556	0.999901	0.330936	0.0790845	0.999678	-0.00964717	0.958682	0.999833	0.316943	0.103013	0.836854	-0.263337	0.160492	0.999973
GGA2	0.0398221	0.799086	0.999916	0.00910369	0.953588	0.999901	0.052494	0.737276	0.999678	-0.179865	0.252582	0.999833	-0.150458	0.35346	0.957323	-0.221062	0.160752	0.999973
CELF1	0.033722	0.789334	0.999916	0.0410025	0.745321	0.999901	0.0736937	0.559718	0.999678	-0.124836	0.324322	0.999833	-0.0271826	0.834866	0.991747	-0.178301	0.160827	0.999973
CCT6P3	0.353765	0.318298	0.999916	0.422209	0.234398	0.999901	0.102189	0.772354	0.999678	-0.140282	0.691352	0.999833	0.286857	0.432826	0.966041	-0.498914	0.160879	0.999973
ATP5MDP1	0.14415	0.615994	0.999916	0.205462	0.47514	0.999901	0.398474	0.168342	0.999678	-0.203437	0.479487	0.999833	-0.787494	0.00971213	0.561977	-0.405666	0.160902	0.999973
TMA7	-0.0631592	0.718409	0.999916	0.0516682	0.76797	0.999901	-0.0228734	0.896056	0.999678	0.373511	0.0359727	0.999833	0.220433	0.225621	0.91692	0.247333	0.160908	0.999973
IQCA1	-0.261879	0.595345	0.999916	-0.995721	0.046523	0.999901	-0.206037	0.675925	0.999678	0.0450164	0.92718	0.999833	0.711476	0.165247	0.885213	-0.695712	0.160992	0.999973
RRM2P3	0.464782	0.421286	0.999916	1.00882	0.0836926	0.999901	0.700221	0.227145	0.999678	0.739904	0.202183	0.999833	1.70763	0.00541373	0.499129	0.813992	0.161148	0.999973
PLEKHA7	0.0675449	0.878497	0.999916	0.00117774	0.997873	0.999901	-0.222614	0.614687	0.999678	-0.087614	0.842822	0.999833	-0.0308097	0.946188	0.995108	0.623734	0.161185	0.999973
NFE2	0.473318	0.564403	0.999916	-0.0207967	0.979772	0.999901	-0.120574	0.883142	0.999678	-0.177744	0.828472	0.999833	-1.02441	0.229354	0.91692	-1.15761	0.16133	0.999973
KIF24	0.354314	0.563349	0.999916	0.148546	0.808367	0.999901	0.0231953	0.969784	0.999678	0.484575	0.429855	0.999833	1.33313	0.0382512	0.717013	0.864161	0.161355	0.999973
SMPD1	-0.00623603	0.974593	0.999916	0.0888462	0.650269	0.999901	-0.0893911	0.648272	0.999678	0.0859157	0.661055	0.999833	-0.0846278	0.675925	0.987213	0.276237	0.161491	0.999973
LMOD1	-0.665785	0.405636	0.999916	-0.427853	0.592477	0.999901	-0.618949	0.439298	0.999678	-2.54338	0.00214261	0.60941	-1.64866	0.0490138	0.742302	-1.12644	0.161497	0.999973
KANSL3	0.251388	0.170411	0.999916	0.248154	0.175898	0.999901	0.0506709	0.78081	0.999678	-0.192888	0.291422	0.999833	-0.0509197	0.786664	0.991747	-0.256788	0.161545	0.999973
USP25	-0.0975692	0.847008	0.999916	-0.399175	0.430952	0.999901	-0.533648	0.293306	0.999678	0.164668	0.744777	0.999833	0.79431	0.131793	0.854988	0.713193	0.161572	0.999973
CDKN3	0.030498	0.932661	0.999916	0.0411896	0.909146	0.999901	-0.299346	0.408132	0.999678	0.625185	0.0868019	0.999833	0.436083	0.244721	0.922116	0.508962	0.161674	0.999973
ALDH3B1	-0.183601	0.789419	0.999916	-0.157891	0.818337	0.999901	-0.281493	0.682314	0.999678	-0.230417	0.737541	0.999833	-0.298535	0.674398	0.987027	-0.96893	0.16178	0.999973
WDR81	-0.299189	0.454008	0.999916	-0.341832	0.392604	0.999901	-0.516185	0.19833	0.999678	0.291373	0.465836	0.999833	0.458278	0.268226	0.929266	0.56198	0.161873	0.999973
UPK2	-0.49409	0.312351	0.999916	-0.863932	0.079691	0.999901	-0.309437	0.525919	0.999678	0.682282	0.164478	0.999833	1.03254	0.0434649	0.727673	0.68638	0.161995	0.999973
AL136366.1	0.27241	0.70391	0.999916	0.041102	0.954247	0.999901	0.232104	0.74604	0.999678	-0.530432	0.459987	0.999833	0.780595	0.293667	0.937002	1.00933	0.162033	0.999973
ZNF436-AS1	-0.480414	0.102364	0.999916	-0.159504	0.584127	0.999901	-0.262861	0.367978	0.999678	-0.123194	0.672324	0.999833	-0.176415	0.557982	0.979275	-0.40986	0.162265	0.999973
CBWD2	0.122949	0.274712	0.999916	0.0536467	0.632376	0.999901	0.0715493	0.523742	0.999678	0.291699	0.0111263	0.876286	0.277443	0.0189907	0.608198	0.157763	0.162287	0.999973
AC020916.1	-0.226603	0.779546	0.999916	0.184252	0.819942	0.999901	-0.0621254	0.938813	0.999678	0.998022	0.2202	0.999833	0.472332	0.572641	0.980334	1.1394	0.162348	0.999973
AC010618.4	0.157691	0.629173	0.999916	0.149283	0.647538	0.999901	0.0389288	0.905029	0.999678	-0.450687	0.170277	0.999833	-0.304154	0.368414	0.958607	-0.459327	0.162351	0.999973
LPAR2	0.193932	0.331462	0.999916	0.0623206	0.754194	0.999901	0.253928	0.204679	0.999678	-0.455456	0.0247916	0.958772	-0.491315	0.0193083	0.611455	-0.280064	0.162409	0.999973
PLOD3	-0.130942	0.529321	0.999916	-0.0604152	0.771369	0.999901	-0.123855	0.551781	0.999678	-0.342778	0.102632	0.999833	-0.449832	0.0393637	0.718265	-0.292269	0.162832	0.999973
GPN2	0.0623929	0.715335	0.999916	-0.0224584	0.895511	0.999901	0.0559952	0.743413	0.999678	-0.274792	0.111543	0.999833	-0.33325	0.0627427	0.78184	-0.240409	0.162905	0.999973
SLC35B2	-0.186283	0.129537	0.999916	-0.206014	0.0942843	0.999901	-0.278235	0.0250756	0.999678	-0.0631435	0.604513	0.999833	0.0030934	0.980388	0.998537	-0.171205	0.162973	0.999973
ITPRIPL1	0.140281	0.866219	0.999916	-0.300183	0.718587	0.999901	0.153943	0.853334	0.999678	-1.4668	0.0816821	0.999833	-1.71063	0.0501164	0.742302	-1.17044	0.162975	0.999973
FBXO16	0.0922942	0.579028	0.999916	0.0675844	0.684381	0.999901	0.368572	0.0294374	0.999678	0.157332	0.34536	0.999833	-0.0026222	0.987813	0.999791	0.233522	0.163061	0.999973
CFAP300	0.0509687	0.88791	0.999916	0.144222	0.690175	0.999901	0.161114	0.656149	0.999678	0.166689	0.645071	0.999833	0.345901	0.356098	0.957323	0.508106	0.163123	0.999973
DCP1B	0.0615659	0.596403	0.999916	0.0732414	0.528873	0.999901	-0.0110956	0.923883	0.999678	0.0499298	0.667451	0.999833	-0.110089	0.360427	0.957563	-0.163173	0.163157	0.999973
GLRX3P2	-0.119991	0.779114	0.999916	-0.213582	0.617843	0.999901	0.0947459	0.82471	0.999678	-0.37851	0.377586	0.999833	-0.942053	0.0361096	0.708731	-0.600823	0.16324	0.999973
HAS2	0.173556	0.83157	0.999916	0.105612	0.897011	0.999901	-0.277808	0.733592	0.999678	-1.12313	0.171738	0.999833	-0.876074	0.300687	0.942	-1.14612	0.163254	0.999973
AL441992.1	0.320774	0.605871	0.999916	-0.247699	0.69019	0.999901	0.196163	0.7522	0.999678	-1.17421	0.0621442	0.999833	-0.837486	0.194744	0.903971	-0.87242	0.163259	0.999973
SMN1	0.0778587	0.788655	0.999916	-0.0116648	0.967957	0.999901	-0.0717024	0.805007	0.999678	0.514901	0.0797452	0.999833	0.52393	0.0843124	0.821072	0.407831	0.163338	0.999973
AC104806.1	-0.18003	0.669894	0.999916	0.0262428	0.950417	0.999901	-0.11054	0.793427	0.999678	-0.12885	0.760208	0.999833	-0.681191	0.121681	0.851276	-0.592564	0.16345	0.999973
SKIV2L	-0.126899	0.42392	0.999916	-0.173761	0.27458	0.999901	-0.0412554	0.794445	0.999678	-0.180415	0.256791	0.999833	-0.00421045	0.979463	0.998391	-0.222209	0.163575	0.999973
MPRIP	0.135207	0.489231	0.999916	-0.0794953	0.683949	0.999901	0.0576241	0.767862	0.999678	-0.0259719	0.894135	0.999833	0.169605	0.401555	0.96175	0.273909	0.163621	0.999973
AAAS	0.0969368	0.41904	0.999916	0.0625612	0.601465	0.999901	0.0585433	0.624972	0.999678	0.0519675	0.664292	0.999833	-0.135609	0.274902	0.931027	-0.167915	0.163683	0.999973
AC103736.1	0.476994	0.225527	0.999916	0.104761	0.788986	0.999901	0.180528	0.644845	0.999678	0.790795	0.0466092	0.999833	0.336237	0.406892	0.962742	0.549097	0.163738	0.999973
SFMBT2	0.082794	0.715343	0.999916	-0.0118701	0.958281	0.999901	0.140293	0.536994	0.999678	0.0222647	0.921839	0.999833	0.361485	0.126527	0.851439	0.318174	0.164014	0.999973
ZNF646	-0.074725	0.794293	0.999916	0.080892	0.777755	0.999901	-0.196318	0.494003	0.999678	-0.13923	0.627318	0.999833	-0.401186	0.17839	0.895956	0.401624	0.164146	0.999973
ZSWIM3	-0.0519252	0.820386	0.999916	0.115947	0.612446	0.999901	-0.0148783	0.948119	0.999678	-0.2388	0.298335	0.999833	-0.0360722	0.878654	0.991747	-0.320484	0.164187	0.999973
PRMT2	0.0211464	0.849636	0.999916	-0.00920323	0.934234	0.999901	-0.00423538	0.969707	0.999678	-0.0678901	0.543276	0.999833	-0.0198655	0.86314	0.991747	-0.156301	0.164234	0.999973
MON1B	0.0603615	0.61154	0.999916	-0.0200899	0.865651	0.999901	-0.051283	0.666025	0.999678	-0.176871	0.139654	0.999833	-0.139076	0.259277	0.926562	-0.16638	0.164281	0.999973
SCARA3	-0.122298	0.868915	0.999916	-0.535802	0.470504	0.999901	-0.904847	0.224668	0.999678	-0.875656	0.23981	0.999833	-1.28654	0.0964054	0.829352	-1.03823	0.164315	0.999973
TIMM21	-0.0166881	0.892087	0.999916	0.0857557	0.486504	0.999901	-0.0279433	0.820321	0.999678	0.0547828	0.656292	0.999833	-0.000685396	0.995697	0.99984	-0.172314	0.164403	0.999973
GAPVD1	0.0684072	0.469604	0.999916	0.109039	0.250528	0.999901	0.111662	0.239429	0.999678	-0.0810699	0.391844	0.999833	-0.0857301	0.380879	0.958882	-0.132241	0.16445	0.999973
DDAH1	-0.334355	0.229372	0.999916	-0.282045	0.30984	0.999901	-0.444022	0.111947	0.999678	0.166301	0.548265	0.999833	0.256209	0.371491	0.958882	0.387391	0.16453	0.999973
IFT27	0.0530714	0.773979	0.999916	0.156526	0.398165	0.999901	0.251039	0.177256	0.999678	0.145122	0.433245	0.999833	0.000669797	0.9972	0.99984	0.258703	0.164578	0.999973
TMEM192	-0.0249043	0.83879	0.999916	0.0798941	0.514609	0.999901	0.14403	0.241795	0.999678	0.077527	0.527105	0.999833	0.021154	0.867166	0.991747	0.171392	0.164579	0.999973
AC113191.1	-0.0716579	0.797272	0.999916	0.214314	0.443249	0.999901	0.0952536	0.732804	0.999678	0.104192	0.708849	0.999833	0.447836	0.123577	0.851276	0.390499	0.164605	0.999973
PSAT1P3	0.0170498	0.978257	0.999916	-0.0821682	0.895506	0.999901	-0.61151	0.330089	0.999678	-0.421061	0.501642	0.999833	0.640912	0.323228	0.948729	-0.875627	0.164751	0.999973
BTF3L4	-0.0988981	0.485943	0.999916	0.0241536	0.864638	0.999901	-0.0216711	0.878434	0.999678	0.273664	0.0568311	0.999833	0.282022	0.0574565	0.76728	0.198299	0.164751	0.999973
FAM122A	0.0797631	0.745809	0.999916	0.0583954	0.812367	0.999901	-0.161373	0.512453	0.999678	0.537464	0.0318467	0.999833	0.433869	0.0913151	0.826336	0.344143	0.164901	0.999973
GPX8	0.0217578	0.976527	0.999916	0.0106965	0.988459	0.999901	-0.2456	0.739899	0.999678	-0.280016	0.705088	0.999833	-1.04484	0.174532	0.893682	-1.03464	0.164918	0.999973
PRRT2	0.212563	0.338751	0.999916	0.0927585	0.675466	0.999901	0.190678	0.390487	0.999678	0.06858	0.756846	0.999833	0.0636913	0.780758	0.991747	0.309774	0.16494	0.999973
AL391244.2	0.672243	0.157505	0.999916	0.550753	0.245644	0.999901	0.361174	0.44509	0.999678	-0.400517	0.397346	0.999833	-0.088098	0.856632	0.991747	0.660237	0.164941	0.999973
DYNLL1P1	-0.0577765	0.863695	0.999916	0.0604266	0.857509	0.999901	0.301128	0.372343	0.999678	-0.406078	0.23014	0.999833	-0.420071	0.229583	0.91692	-0.470767	0.164979	0.999973
AL078621.3	0.516933	0.346607	0.999916	0.448014	0.414269	0.999901	0.399214	0.466698	0.999678	-0.469756	0.392106	0.999833	-1.02059	0.07467	0.803479	-0.765424	0.165139	0.999973
AC092164.1	-0.205791	0.767729	0.999916	-0.140034	0.84069	0.999901	0.0876569	0.89986	0.999678	0.182673	0.793176	0.999833	0.615062	0.394083	0.960423	0.97394	0.16519	0.999973
TMBIM4	0.0755446	0.765418	0.999916	0.0595907	0.813904	0.999901	0.218507	0.389324	0.999678	0.133802	0.597442	0.999833	0.257724	0.32617	0.950277	0.353829	0.165271	0.999973
CRTC2	-0.0830016	0.68641	0.999916	-0.0452719	0.825632	0.999901	-0.00528341	0.979484	0.999678	-0.170908	0.406748	0.999833	-0.311228	0.145912	0.866715	0.287092	0.165462	0.999973
ZNF749	-0.0569276	0.788991	0.999916	0.174855	0.412163	0.999901	0.0961059	0.651579	0.999678	0.151323	0.477587	0.999833	-0.00312287	0.98866	0.999791	-0.297006	0.165671	0.999973
SYNM	0.0311233	0.923616	0.999916	-0.113308	0.727159	0.999901	-0.265085	0.415325	0.999678	0.162996	0.615907	0.999833	0.138843	0.679082	0.987662	0.453262	0.165748	0.999973
LRRC1	0.266005	0.397892	0.999916	0.243081	0.439587	0.999901	0.125662	0.688989	0.999678	-0.0991336	0.752147	0.999833	-0.0194682	0.952117	0.995261	-0.438046	0.165855	0.999973
IL32	-0.0828492	0.919245	0.999916	0.142604	0.861476	0.999901	-0.188216	0.817868	0.999678	-1.65337	0.0463368	0.999833	-1.0157	0.231552	0.91692	-1.14064	0.165896	0.999973
AC026403.1	0.0458997	0.888847	0.999916	0.216986	0.509477	0.999901	0.265703	0.419621	0.999678	-0.481699	0.14571	0.999833	-1.02219	0.00356711	0.45808	-0.458376	0.165907	0.999973
SGMS2	-0.227956	0.711115	0.999916	-0.339651	0.58131	0.999901	-0.252449	0.681731	0.999678	0.0165632	0.97852	0.999833	0.943423	0.141062	0.862188	-0.858576	0.165962	0.999973
LRRC32	-1.54643	0.170751	0.999916	-1.39786	0.215036	0.999901	-2.10875	0.0633854	0.999678	1.08053	0.33672	0.999833	1.37637	0.237136	0.918088	-1.56273	0.166352	0.999973
LINC01546	0.231286	0.767513	0.999916	0.0893851	0.909012	0.999901	0.263463	0.736324	0.999678	-0.107336	0.890846	0.999833	-1.52267	0.0630041	0.781878	-1.09033	0.166422	0.999973
HIKESHI	0.00791882	0.945966	0.999916	0.0777831	0.506316	0.999901	0.132137	0.26043	0.999678	0.149224	0.204368	0.999833	0.0337641	0.779781	0.991747	0.162869	0.166474	0.999973
RHPN1-AS1	-0.637258	0.410632	0.999916	-0.975284	0.20954	0.999901	-0.296643	0.701133	0.999678	-0.513454	0.506982	0.999833	-0.658371	0.410668	0.962742	-1.07572	0.166898	0.999973
SMIM4	0.0234655	0.932126	0.999916	0.155046	0.57406	0.999901	0.0468281	0.865046	0.999678	-0.157073	0.569076	0.999833	-0.397762	0.165458	0.885213	-0.38358	0.166974	0.999973
MBOAT1	-0.00718785	0.992932	0.999916	0.633765	0.435852	0.999901	0.0658967	0.935276	0.999678	-0.552638	0.496597	0.999833	-1.43448	0.0906306	0.826336	-1.12951	0.167056	0.999973
ARPC3P5	-0.194764	0.489396	0.999916	0.232899	0.408823	0.999901	-0.1716	0.542321	0.999678	-0.707159	0.0140496	0.901248	-0.558927	0.0578523	0.768927	-0.391408	0.167123	0.999973
KCNA1	3.15226	0.000904007	0.999916	-0.0506732	0.955572	0.999901	1.35509	0.139611	0.999678	-0.373898	0.681215	0.999833	-0.128723	0.89106	0.992475	-1.26587	0.167142	0.999973
AP003721.1	-1.38954	0.0225134	0.999916	-0.851649	0.156774	0.999901	-0.919589	0.126756	0.999678	-0.0651709	0.913044	0.999833	-0.179902	0.770538	0.991747	-0.830548	0.167143	0.999973
GMPPA	-0.145516	0.397023	0.999916	-0.0396695	0.816938	0.999901	-0.156933	0.361248	0.999678	-0.0979282	0.568108	0.999833	0.0271982	0.877904	0.991747	-0.238359	0.167304	0.999973
AL391840.3	0.0714845	0.845807	0.999916	0.0912586	0.803946	0.999901	0.109699	0.765418	0.999678	0.227196	0.537065	0.999833	0.386604	0.310568	0.945821	0.511074	0.167492	0.999973
AC005912.1	0.0775367	0.776293	0.999916	0.403681	0.142235	0.999901	0.285006	0.298142	0.999678	-0.467151	0.0903551	0.999833	-0.5016	0.0786756	0.811162	-0.379278	0.167542	0.999973
HSPE1P4	-0.0846385	0.814745	0.999916	-0.111878	0.756814	0.999901	0.355915	0.326186	0.999678	-0.573701	0.115645	0.999833	-0.733086	0.0528508	0.754541	-0.501744	0.167875	0.999973
HEG1	0.0122333	0.981212	0.999916	-0.0216181	0.966805	0.999901	-0.102178	0.844088	0.999678	-0.632989	0.225666	0.999833	-0.694483	0.198566	0.907016	-0.721624	0.167918	0.999973
USP18	0.334448	0.710572	0.999916	0.0135576	0.987992	0.999901	-1.01021	0.264393	0.999678	1.14514	0.206441	0.999833	1.25491	0.180572	0.897053	1.25074	0.168115	0.999973
LSM2	-0.0299559	0.841918	0.999916	0.0890615	0.55369	0.999901	0.0256331	0.864485	0.999678	-0.121657	0.419064	0.999833	-0.249426	0.111444	0.845916	-0.208515	0.168125	0.999973
AL512353.1	0.26197	0.759454	0.999916	0.382948	0.654574	0.999901	0.0120477	0.988761	0.999678	-0.479202	0.575732	0.999833	-0.351077	0.691322	0.987662	-1.18741	0.168148	0.999973
AP001816.1	-0.0695676	0.819638	0.999916	-0.0917151	0.763753	0.999901	-0.23349	0.445047	0.999678	-0.645844	0.0373662	0.999833	-0.552437	0.0831961	0.819447	-0.423434	0.168235	0.999973
NAT10	-0.0382031	0.755355	0.999916	0.0115163	0.925141	0.999901	0.0259884	0.832103	0.999678	-0.158441	0.198976	0.999833	0.0514307	0.68483	0.987662	-0.170123	0.168249	0.999973
ADPRHL2	-0.125244	0.419917	0.999916	-0.0733281	0.636204	0.999901	-0.124599	0.422301	0.999678	-0.0039366	0.979724	0.999833	-0.0939142	0.557835	0.979275	-0.214988	0.168262	0.999973
MANBAL	0.0868819	0.53307	0.999916	0.0941741	0.49938	0.999901	0.074488	0.592913	0.999678	-0.122167	0.381469	0.999833	-0.161484	0.26375	0.927115	-0.193158	0.168302	0.999973
EFS	0.199506	0.76913	0.999916	-0.164254	0.80903	0.999901	-0.211418	0.755781	0.999678	-2.65466	0.000214491	0.430615	-1.91081	0.00809477	0.550993	-0.942935	0.168352	0.999973
DDB2	0.0802207	0.755602	0.999916	0.0975031	0.705245	0.999901	0.0767376	0.765889	0.999678	-0.0986066	0.702071	0.999833	-0.620933	0.0222768	0.64481	-0.357505	0.168368	0.999973
AGFG1	-0.183482	0.726276	0.999916	-0.521188	0.321633	0.999901	-0.73516	0.163679	0.999678	0.171086	0.744083	0.999833	0.804075	0.140729	0.860956	0.726923	0.168379	0.999973
PTPDC1	0.0214205	0.929163	0.999916	-0.0831702	0.730079	0.999901	-0.000773501	0.997439	0.999678	-0.314882	0.194178	0.999833	-0.141699	0.569711	0.980334	-0.334247	0.168502	0.999973
TMEM87B	0.108309	0.629334	0.999916	-0.0570512	0.799181	0.999901	-0.0286488	0.898326	0.999678	0.174331	0.437884	0.999833	0.145633	0.530174	0.972212	0.310974	0.168547	0.999973
PTPN12	0.0576659	0.720445	0.999916	0.130773	0.418002	0.999901	0.147918	0.359967	0.999678	0.187765	0.246153	0.999833	0.0876588	0.598746	0.981723	0.22339	0.168566	0.999973
THAP6	0.025874	0.872716	0.999916	0.0781586	0.628699	0.999901	0.054261	0.736973	0.999678	0.198082	0.222632	0.999833	0.19645	0.241535	0.920326	0.223889	0.168739	0.999973
IFI44L	0.344825	0.724938	0.999916	0.0370606	0.969819	0.999901	-0.846071	0.389083	0.999678	-0.706678	0.471521	0.999833	-0.709147	0.484317	0.966679	-1.35781	0.16881	0.999973
AC012063.1	-0.0461424	0.879175	0.999916	-0.381605	0.211408	0.999901	-0.0506034	0.867599	0.999678	-0.00560225	0.985273	0.999833	-0.0354622	0.909968	0.992673	-0.420663	0.168872	0.999973
SNUPN	0.0205028	0.874453	0.999916	-0.133819	0.304345	0.999901	-0.105566	0.417052	0.999678	-0.0699894	0.590011	0.999833	-0.0382729	0.775332	0.991747	-0.179828	0.168877	0.999973
SELENOO	-0.0161984	0.977523	0.999916	-0.0859762	0.881136	0.999901	-0.477542	0.407445	0.999678	-0.606394	0.293619	0.999833	-0.170463	0.774212	0.991747	0.796352	0.169136	0.999973
F3	-0.327707	0.662682	0.999916	0.0389784	0.958591	0.999901	-0.285588	0.703785	0.999678	0.70866	0.346827	0.999833	0.225575	0.771256	0.991747	1.03913	0.169413	0.999973
PGBD2	0.281902	0.175343	0.999916	0.118096	0.567943	0.999901	-0.0126455	0.951178	0.999678	-0.234843	0.257868	0.999833	-0.120839	0.571681	0.980334	-0.285877	0.169422	0.999973
MAP3K21	0.143284	0.844731	0.999916	-0.501252	0.493981	0.999901	0.0731214	0.920379	0.999678	0.99088	0.178598	0.999833	1.24501	0.103031	0.836854	1.01247	0.169451	0.999973
USP48	-0.0958061	0.477729	0.999916	-0.147751	0.274849	0.999901	-0.0502257	0.709357	0.999678	0.140457	0.299028	0.999833	0.094407	0.498264	0.96751	0.186343	0.169607	0.999973
LRRC10B	-0.259016	0.772536	0.999916	-0.802006	0.372095	0.999901	-0.585406	0.514117	0.999678	-0.166899	0.852216	0.999833	1.29389	0.165265	0.885213	1.23897	0.169743	0.999973
AP000845.1	-0.162716	0.776269	0.999916	0.251055	0.661183	0.999901	0.498977	0.384745	0.999678	0.382208	0.505036	0.999833	0.0997652	0.866053	0.991747	-0.791219	0.169994	0.999973
RPS3AP5	0.0201711	0.957966	0.999916	-0.116628	0.760645	0.999901	0.607843	0.115705	0.999678	-0.640424	0.0977919	0.999833	-1.09881	0.00692005	0.523113	-0.5289	0.170087	0.999973
TIGD6	0.00775874	0.964263	0.999916	0.0670931	0.698592	0.999901	0.164062	0.345095	0.999678	0.00872912	0.959797	0.999833	0.230487	0.200527	0.907895	-0.23927	0.170169	0.999973
MPND	-0.337371	0.554415	0.999916	-0.532405	0.351836	0.999901	-0.773049	0.178018	0.999678	-0.195257	0.732014	0.999833	0.267232	0.650219	0.984884	0.787331	0.170248	0.999973
WDR90	0.153066	0.710102	0.999916	0.151871	0.71226	0.999901	0.0429645	0.916859	0.999678	-0.262563	0.524143	0.999833	-0.300261	0.480958	0.966679	-0.56849	0.170295	0.999973
KIF2C	0.0747656	0.900966	0.999916	0.0148888	0.980228	0.999901	-0.254637	0.671892	0.999678	-0.442881	0.461951	0.999833	0.705817	0.257869	0.926562	-0.829843	0.170302	0.999973
RFX2	0.111331	0.783821	0.999916	0.203324	0.616589	0.999901	0.0904168	0.82367	0.999678	0.244089	0.547962	0.999833	0.481393	0.253187	0.925991	0.560198	0.170439	0.999973
ARID1B	0.139929	0.530352	0.999916	-0.00167286	0.994006	0.999901	0.0597239	0.788585	0.999678	0.0853899	0.701518	0.999833	0.158873	0.490634	0.967231	0.307339	0.170612	0.999973
GAK	0.150168	0.362371	0.999916	0.114195	0.487936	0.999901	-0.00700966	0.965977	0.999678	-0.19789	0.231113	0.999833	-0.226024	0.186113	0.89916	-0.226799	0.170666	0.999973
MORF4	0.126439	0.683171	0.999916	0.201702	0.51541	0.999901	0.0892376	0.773233	0.999678	-0.604152	0.0544159	0.999833	-0.383617	0.233002	0.91692	-0.427161	0.170774	0.999973
RPL3	-0.0771612	0.595547	0.999916	0.0316263	0.827612	0.999901	0.085696	0.555607	0.999678	-0.118313	0.416381	0.999833	-0.19713	0.191794	0.903971	-0.200298	0.170873	0.999973
IDH3G	0.0318652	0.837504	0.999916	0.0290678	0.851592	0.999901	0.035027	0.821646	0.999678	-0.106728	0.492857	0.999833	-0.236165	0.144502	0.866715	-0.214193	0.171066	0.999973
DCAF5	-0.0025554	0.982892	0.999916	0.0822408	0.490909	0.999901	0.050864	0.669721	0.999678	-0.115195	0.335448	0.999833	-0.125924	0.30838	0.945731	-0.164211	0.171308	0.999973
LYPD6	0.00780331	0.985799	0.999916	-0.0147055	0.973242	0.999901	-0.0321529	0.941538	0.999678	0.00310581	0.994348	0.999833	-0.749407	0.101581	0.836854	-0.603995	0.171409	0.999973
SCLY	0.011577	0.958046	0.999916	-0.0527155	0.810726	0.999901	0.139184	0.527723	0.999678	0.189226	0.391221	0.999833	-0.269071	0.239186	0.919023	-0.303126	0.171483	0.999973
SLC33A1	-0.0388104	0.876405	0.999916	0.150434	0.547137	0.999901	-0.0169163	0.945949	0.999678	-0.160225	0.521445	0.999833	-0.338396	0.192242	0.903971	-0.343567	0.171634	0.999973
ZNF615	0.0862731	0.605328	0.999916	-0.0724511	0.664219	0.999901	-0.03334	0.841579	0.999678	0.0381401	0.819149	0.999833	0.236143	0.173651	0.893206	-0.229562	0.171784	0.999973
PQLC2	-0.319119	0.0278904	0.999916	-0.113688	0.425861	0.999901	-0.191513	0.181739	0.999678	-0.128654	0.367853	0.999833	-0.227511	0.125506	0.851439	-0.196011	0.171834	0.999973
POC1B	-0.18349	0.409651	0.999916	-0.212412	0.340278	0.999901	-0.352525	0.115711	0.999678	0.0600207	0.786901	0.999833	0.453659	0.0512803	0.747472	0.305418	0.171917	0.999973
C1orf52	-0.0511306	0.733681	0.999916	0.0407889	0.786037	0.999901	-0.000457916	0.997568	0.999678	-0.0753446	0.616305	0.999833	-0.14725	0.344416	0.956785	-0.206694	0.171922	0.999973
ANKUB1	-0.114657	0.887258	0.999916	-0.0471104	0.953545	0.999901	-0.0281905	0.972191	0.999678	-0.160766	0.84244	0.999833	-0.864183	0.302987	0.942583	-1.11253	0.171994	0.999973
DESI2	0.0246024	0.871529	0.999916	0.0434323	0.775315	0.999901	-0.00929621	0.95127	0.999678	0.0806566	0.596354	0.999833	0.234362	0.139267	0.85895	0.209249	0.17205	0.999973
EIF3A	-0.0743914	0.403528	0.999916	0.0419093	0.637307	0.999901	0.064966	0.46541	0.999678	-0.0836839	0.347724	0.999833	-0.119459	0.195882	0.904025	-0.122168	0.172063	0.999973
AP001000.1	-0.0365146	0.829382	0.999916	0.183781	0.280187	0.999901	0.387968	0.0247402	0.999678	-0.222216	0.192561	0.999833	-0.160287	0.361371	0.958022	-0.233034	0.172068	0.999973
AC124319.3	0.408134	0.343495	0.999916	0.545603	0.206619	0.999901	0.600892	0.164806	0.999678	-0.388837	0.366641	0.999833	0.342076	0.441683	0.966679	0.590496	0.172127	0.999973
TTC28	0.0651846	0.791645	0.999916	0.0662509	0.788319	0.999901	-0.039349	0.873277	0.999678	0.124439	0.614293	0.999833	-0.00331148	0.989634	0.999791	0.33925	0.172149	0.999973
ENAH	-0.0132437	0.947877	0.999916	-0.0432435	0.830999	0.999901	-0.0501004	0.804717	0.999678	0.0600843	0.766858	0.999833	0.102569	0.624438	0.982702	0.278586	0.172181	0.999973
AC244090.1	0.0251041	0.926499	0.999916	0.166495	0.54123	0.999901	0.404562	0.140431	0.999678	0.0458083	0.866332	0.999833	-0.40423	0.153753	0.871913	-0.374181	0.172213	0.999973
PARP14	0.444907	0.524337	0.999916	0.257833	0.711866	0.999901	-0.175839	0.801069	0.999678	-0.0901786	0.897166	0.999833	0.164732	0.81928	0.991747	-0.959107	0.17233	0.999973
TMEM14B	0.00351525	0.985398	0.999916	0.0319444	0.867919	0.999901	-0.00404767	0.983186	0.999678	0.301962	0.119371	0.999833	0.238165	0.23266	0.91692	0.263915	0.17251	0.999973
LINC01018	0.926397	0.148978	0.999916	0.783986	0.220921	0.999901	1.05929	0.0997351	0.999678	-0.0243858	0.969451	0.999833	-0.335787	0.610137	0.982165	-0.874901	0.172534	0.999973
PLEKHH1	0.0758747	0.840004	0.999916	-0.126278	0.736941	0.999901	-0.239151	0.525142	0.999678	-0.0910386	0.80861	0.999833	-0.0175563	0.963933	0.996354	0.516242	0.172587	0.999973
USP4	0.0100743	0.921928	0.999916	0.0160679	0.875794	0.999901	0.0246316	0.810658	0.999678	-0.0393589	0.70195	0.999833	0.00704867	0.947085	0.995108	-0.141214	0.172594	0.999973
CREB3L4	0.249077	0.50937	0.999916	0.354118	0.349032	0.999901	0.441666	0.243694	0.999678	0.581512	0.126241	0.999833	-0.247428	0.52578	0.971634	0.517709	0.172612	0.999973
IRF2BP2	-0.09413	0.72551	0.999916	-0.14815	0.580805	0.999901	-0.299789	0.265548	0.999678	0.185288	0.490081	0.999833	0.177124	0.522999	0.97158	0.368078	0.172663	0.999973
HSD17B8	0.0587414	0.822225	0.999916	0.102991	0.693746	0.999901	0.0176418	0.946191	0.999678	-0.0742707	0.776372	0.999833	-0.460029	0.0920535	0.826336	-0.359018	0.17269	0.999973
CLPP	0.00198246	0.988524	0.999916	0.0594627	0.666395	0.999901	0.116102	0.400889	0.999678	-0.151229	0.274778	0.999833	-0.331028	0.0227343	0.650271	-0.189253	0.172824	0.999973
HOMER2	-0.173709	0.595537	0.999916	-0.340995	0.298894	0.999901	-0.285655	0.383589	0.999678	0.276136	0.399548	0.999833	0.274403	0.417711	0.962742	0.44866	0.172988	0.999973
PMS1	-0.0469445	0.721725	0.999916	-0.00113135	0.993148	0.999901	-0.0486794	0.711901	0.999678	0.100803	0.445215	0.999833	0.164942	0.22823	0.91692	0.18074	0.173184	0.999973
FGF2	-0.429153	0.3321	0.999916	-0.506872	0.252664	0.999901	-0.706905	0.112328	0.999678	0.56021	0.206637	0.999833	0.605307	0.186865	0.89916	0.604719	0.173253	0.999973
RPS6KB2	-0.0182361	0.9141	0.999916	-0.183558	0.279738	0.999901	-0.0980728	0.562328	0.999678	-0.0728349	0.666803	0.999833	-0.269527	0.126227	0.851439	-0.231876	0.173262	0.999973
SLC35F6	0.0188303	0.914347	0.999916	0.0412269	0.813863	0.999901	-0.080944	0.644092	0.999678	-0.143183	0.414626	0.999833	-0.161829	0.372432	0.958882	-0.240113	0.173286	0.999973
ARHGEF40	0.135453	0.479891	0.999916	0.0703714	0.713207	0.999901	-0.094537	0.621615	0.999678	-0.0614086	0.748377	0.999833	-0.142246	0.472748	0.966679	0.262384	0.173412	0.999973
AC007424.1	-0.340267	0.688975	0.999916	0.0737819	0.930799	0.999901	-0.205111	0.809275	0.999678	0.0889408	0.91663	0.999833	-0.376563	0.668167	0.985855	1.16431	0.173646	0.999973
PSMD2	-0.0531408	0.658488	0.999916	-0.0757467	0.528998	0.999901	-0.11682	0.332615	0.999678	-0.0930582	0.439635	0.999833	-0.0675052	0.586978	0.981723	-0.164627	0.173668	0.999973
VHL	-0.120754	0.520358	0.999916	-0.147787	0.431823	0.999901	0.0187312	0.920451	0.999678	0.048097	0.797661	0.999833	0.0356133	0.854207	0.991747	-0.256966	0.173749	0.999973
AC012640.2	0.257622	0.476101	0.999916	0.278281	0.441609	0.999901	0.159731	0.658233	0.999678	-0.306605	0.396781	0.999833	-0.496939	0.185525	0.89916	-0.494272	0.173814	0.999973
TNN	-0.41469	0.689661	0.999916	-0.496743	0.632509	0.999901	-1.23423	0.236903	0.999678	0.347455	0.7379	0.999833	-0.592724	0.580885	0.981723	-1.42171	0.173816	0.999973
AL606490.2	-0.4446	0.21011	0.999916	-0.0268774	0.93924	0.999901	-0.229134	0.516475	0.999678	-0.215279	0.542077	0.999833	-0.174243	0.632747	0.982702	-0.482891	0.173916	0.999973
MAP7D1	-0.230783	0.726558	0.999916	-0.560344	0.396919	0.999901	-0.910049	0.170798	0.999678	-0.0882841	0.893535	0.999833	0.515091	0.450772	0.966679	0.903296	0.173949	0.999973
AL139353.2	-0.170341	0.700649	0.999916	-0.0196855	0.964543	0.999901	-0.0294667	0.946947	0.999678	0.969817	0.031485	0.999833	0.481354	0.29483	0.937207	0.606254	0.174067	0.999973
TRMT13	0.147674	0.413851	0.999916	0.381077	0.037636	0.999901	0.285288	0.116963	0.999678	-0.0138372	0.938812	0.999833	0.117762	0.527822	0.971695	0.246739	0.17413	0.999973
DDX60L	0.458129	0.485557	0.999916	0.621107	0.345168	0.999901	0.0411786	0.949924	0.999678	-0.928474	0.159955	0.999833	-1.07108	0.117342	0.849813	-0.897486	0.174146	0.999973
EPHX4	-0.0560502	0.888277	0.999916	-0.0506324	0.899014	0.999901	-0.157643	0.69291	0.999678	0.120506	0.762689	0.999833	1.12175	0.00810236	0.550993	0.546026	0.174185	0.999973
NOTCH3	-0.141471	0.870034	0.999916	-0.530604	0.539991	0.999901	-0.84618	0.329498	0.999678	-0.322215	0.709529	0.999833	1.88438	0.0380409	0.716514	1.18328	0.174195	0.999973
AP000704.1	0.381549	0.3945	0.999916	-0.0624171	0.888917	0.999901	0.264575	0.554319	0.999678	0.836026	0.0648478	0.999833	0.539212	0.245305	0.922116	0.611381	0.174318	0.999973
AC010300.1	0.849016	0.131656	0.999916	0.307622	0.582012	0.999901	0.971166	0.0854508	0.999678	-0.317499	0.569982	0.999833	0.142447	0.804963	0.991747	0.763632	0.174385	0.999973
PPP6R3	-0.00260663	0.981448	0.999916	0.0841785	0.453669	0.999901	-0.0484403	0.665874	0.999678	-0.075806	0.499637	0.999833	-0.0449386	0.698179	0.988974	-0.153329	0.174444	0.999973
UCN	-0.148037	0.709525	0.999916	-0.522766	0.191081	0.999901	-0.0951752	0.810674	0.999678	-0.030841	0.938112	0.999833	0.599661	0.147259	0.866715	0.543118	0.174597	0.999973
AC087741.1	-0.0197711	0.976682	0.999916	0.540029	0.425793	0.999901	0.782152	0.24998	0.999678	-1.44771	0.035407	0.999833	-1.07732	0.126617	0.851439	0.924727	0.174668	0.999973
SLC12A6	0.0976291	0.606184	0.999916	0.190278	0.316401	0.999901	0.0963383	0.610945	0.999678	-0.10993	0.561697	0.999833	0.0503634	0.796721	0.991747	0.258607	0.17471	0.999973
GUSBP11	0.146411	0.678632	0.999916	0.321111	0.364708	0.999901	0.344855	0.330563	0.999678	1.07663	0.00321117	0.671294	0.527366	0.151604	0.868419	0.482715	0.174715	0.999973
PDSS1	0.0742909	0.77092	0.999916	0.0196433	0.938614	0.999901	-0.082884	0.745314	0.999678	0.125961	0.621743	0.999833	0.386753	0.14552	0.866715	0.348656	0.174717	0.999973
RPS4XP3	0.174547	0.66339	0.999916	0.179068	0.655241	0.999901	-0.0449499	0.910696	0.999678	-0.691987	0.0877692	0.999833	-0.471683	0.256997	0.926562	-0.547731	0.174768	0.999973
RPS12	0.0750519	0.676946	0.999916	0.108397	0.547639	0.999901	0.182805	0.311795	0.999678	-0.149996	0.405975	0.999833	-0.353007	0.0611798	0.781405	-0.24601	0.174831	0.999973
SPC24	0.112461	0.873818	0.999916	0.000663418	0.999252	0.999901	-0.309722	0.662046	0.999678	-0.746809	0.293629	0.999833	-1.91586	0.0106836	0.569187	-0.967506	0.174893	0.999973
AC007622.2	-0.0854897	0.86269	0.999916	-0.59541	0.230921	0.999901	-0.293183	0.553591	0.999678	0.0597194	0.903831	0.999833	0.30956	0.544956	0.975827	0.675091	0.175043	0.999973
C5orf58	-0.491266	0.742651	0.999916	0.0770568	0.958909	0.999901	-1.05855	0.479921	0.999678	1.4464	0.335221	0.999833	-1.45203	0.349018	0.956785	2.04278	0.175046	0.999973
PANK4	-0.264528	0.0757789	0.999916	-0.0880903	0.549969	0.999901	-0.0584007	0.691639	0.999678	-0.149483	0.311628	0.999833	-0.100954	0.507414	0.968609	-0.200972	0.175092	0.999973
NUP62CL	0.513435	0.282148	0.999916	0.356618	0.454008	0.999901	-0.16778	0.72419	0.999678	1.25631	0.010001	0.830612	1.01891	0.0411918	0.718265	0.649067	0.175094	0.999973
TXNP6	0.521446	0.245612	0.999916	0.0876562	0.844474	0.999901	0.532005	0.236281	0.999678	-0.6795	0.131666	0.999833	-1.12411	0.0172242	0.605677	-0.609915	0.175265	0.999973
AC138409.2	0.36904	0.39836	0.999916	-0.0429777	0.921437	0.999901	0.845979	0.0556327	0.999678	-0.174915	0.688305	0.999833	0.0565504	0.900051	0.992475	0.594889	0.175266	0.999973
BTAF1	-0.0161935	0.913119	0.999916	-0.0486525	0.743155	0.999901	0.0183841	0.901424	0.999678	-0.158563	0.287467	0.999833	0.0207166	0.892541	0.992475	-0.202522	0.175459	0.999973
[truncated: 14,936 more rows]
