# Supplementary material for: Modeling gene x environment interactions in PTSD using glucocorticoid-induced transcriptomics in human neurons
Source: Research Square preprint supplement (doi:10.21203/rs.3.rs-267139/v1), 2021-02-25
Supplement: Supplementary file 7 [file 6e559850143b2b6a105d4592.xlsx]

## Sheet: Sheet1
Supplemental Table 1. Dexamethasone (DEX) stimulated changes in PBMC gene expression for each concentration (2.5nM, 5nM, 50nM DEX).
	2.5nM DEX				5nM DEX				50nM DEX
Gene symbol	logFC	t	P.Value	adj.P.Val	logFC	t	P.Value	adj.P.Val	logFC	t	P.Value	adj.P.Val
TSC22D3	1.2707	4.45114	7.6695e-05	0.204752	1.91079	6.80025	5.44233e-08	0.00187732	2.12144	6.73144	6.72331e-08	0.000109602
TMIGD3	1.5332	3.55975	0.00104697	0.300832	2.76099	6.51282	1.3185e-07	0.00187732	3.2975	6.9351	3.60004e-08	0.000109602
FN1	-1.29903	-4.75929	3.00553e-05	0.175005	-1.76341	-6.56387	1.12635e-07	0.00187732	-1.79511	-5.95747	7.36937e-07	0.000184037
ADORA3	1.76276	3.84283	0.000465552	0.300832	2.82549	6.25801	2.8999e-07	0.00309673	2.65242	5.2378	6.88606e-06	0.000410807
TIMP3	-0.849375	-3.71017	0.000682464	0.300832	-1.37553	-6.10449	4.66828e-07	0.00398811	-1.3899	-5.49952	3.05829e-06	0.000290691
FEZ1	-0.680274	-5.00917	1.39537e-05	0.121457	-0.80713	-6.03822	5.73461e-07	0.00408257	-0.790543	-5.27296	6.17554e-06	0.000394631
MS4A4A	1.56992	3.27613	0.00230271	0.321291	2.77732	5.88831	9.13584e-07	0.00509187	2.97485	5.62334	2.08175e-06	0.000255321
RP11-212I21.2	-0.653002	-2.61106	0.012992	0.391063	-1.44606	-5.8745	9.53646e-07	0.00509187	-1.53662	-5.56564	2.49046e-06	0.000274176
F13A1	2.05839	4.39819	8.9973e-05	0.208002	2.67296	5.8026	1.19248e-06	0.00565962	1.60629	3.10897	0.00361729	0.0202484
TNFAIP6	-0.920332	-2.71028	0.0101576	0.373715	-1.9177	-5.73764	1.45927e-06	0.00623326	-2.21398	-5.90597	8.64809e-07	0.000186173
ACVR1	-0.474656	-3.83169	0.00048083	0.300832	-0.685331	-5.62077	2.09842e-06	0.00814856	-0.581924	-4.25525	0.000138138	0.00242882
RP13-452N2.1	-0.648245	-2.65193	0.0117461	0.385769	-1.33518	-5.54938	2.61951e-06	0.00932436	-1.29281	-4.79075	2.72968e-05	0.000898984
VASH1	-0.818225	-2.81447	0.00780644	0.365913	-1.57004	-5.48678	3.18171e-06	0.00970762	-2.05728	-6.41009	1.81105e-07	0.000114675
PHLDA1	-0.869416	-3.43196	0.00149814	0.307213	-1.36851	-5.48841	3.16558e-06	0.00970762	-1.39333	-4.98216	1.51644e-05	0.00063072
RP11-20G13.3	-1.1079	-1.98023	0.0552086	0.449984	-2.98542	-5.42131	3.89872e-06	0.0111023	-3.1518	-5.10295	1.04485e-05	0.000507595
DDIT4	0.825899	2.58724	0.0137731	0.394206	1.63587	5.20644	7.58788e-06	0.0134001	2.22397	6.31083	2.46219e-07	0.000128892
GSN	-0.870279	-3.03313	0.00442459	0.342633	-1.46362	-5.18255	8.16974e-06	0.0134001	-1.98951	-6.28096	2.70088e-07	0.0001311
TIGIT	-0.574834	-3.76755	0.000578731	0.300832	-0.78564	-5.23147	7.02215e-06	0.0134001	-0.982861	-5.83521	1.07754e-06	0.000192582
ADGRE2	-0.615811	-3.20166	0.00281948	0.328535	-0.981656	-5.18526	8.10169e-06	0.0134001	-1.12004	-5.27484	6.13982e-06	0.000394631
SRPX	0.467284	1.65354	0.106746	0.475244	1.46921	5.28205	6.0041e-06	0.0134001	1.6023	5.13602	9.43373e-06	0.000482589
CD1B	-0.790606	-2.16868	0.0366582	0.437267	-1.87425	-5.22331	7.20184e-06	0.0134001	-1.9685	-4.89123	2.00578e-05	0.000735023
MGST1	-0.612964	-2.86516	0.00685599	0.363953	-1.08783	-5.16607	8.59709e-06	0.0134001	-1.14914	-4.86558	2.17011e-05	0.000780273
CXCR4	0.5272	2.98131	0.00507087	0.350333	0.912652	5.2435	6.76548e-06	0.0134001	0.917588	4.70032	3.59889e-05	0.00106018
GPX3	-0.43021	-2.71731	0.00998026	0.372436	-0.831324	-5.33475	5.09946e-06	0.0134001	-0.780461	-4.46538	7.34675e-05	0.00164993
RP11-1082L8.2	1.0137	4.07466	0.000236194	0.224261	1.26331	5.15911	8.78387e-06	0.0134001	1.18531	4.3158	0.000115245	0.00217333
TIE1	-0.893911	-3.33214	0.0019749	0.320558	-1.374	-5.20356	7.65575e-06	0.0134001	-1.21772	-4.11172	0.000211686	0.00319399
CXCL12	1.09053	5.24852	6.66127e-06	0.0948454	1.07867	5.27438	6.1485e-06	0.0134001	0.869728	3.79168	0.000539828	0.00583681
P2RX6P	0.841776	3.34526	0.00190484	0.320558	1.29466	5.22724	7.1148e-06	0.0134001	0.919146	3.30876	0.00210592	0.014283
CD1E	-0.535385	-1.9718	0.0562016	0.450341	-1.37262	-5.13605	9.43279e-06	0.0138939	-1.31924	-4.40117	8.91696e-05	0.00185437
TSPOAP1	-0.428127	-3.10852	0.0036216	0.338618	-0.692715	-5.10999	1.02238e-05	0.0141198	-0.910122	-5.98588	6.74675e-07	0.000183734
GSN-AS1	-0.505676	-2.70635	0.010258	0.375623	-0.939637	-5.10924	1.02473e-05	0.0141198	-0.90969	-4.41015	8.67882e-05	0.0018226
LYST	-0.610249	-3.46929	0.00134996	0.301693	-0.882677	-5.09823	1.06018e-05	0.0141517	-1.12675	-5.80242	1.19313e-06	0.000202104
EMP2	0.561773	3.90711	0.000386183	0.280409	0.719035	5.08076	1.11892e-05	0.0144833	0.96123	6.05578	5.43028e-07	0.000170656
CA2	-0.975506	-2.73336	0.00958633	0.369421	-1.76442	-5.02288	1.33763e-05	0.015036	-2.69439	-6.83871	4.83671e-08	0.000109602
BCL6	-0.585472	-3.39561	0.00165735	0.307213	-0.855904	-5.04337	1.25576e-05	0.015036	-1.11921	-5.87989	9.37812e-07	0.000186173
RASAL2	-0.661202	-3.27562	0.00230587	0.321291	-0.999125	-5.02878	1.31351e-05	0.015036	-1.06016	-4.7575	3.02203e-05	0.00095761
RP11-496N12.9	1.25831	4.56212	5.48096e-05	0.204752	1.36602	5.03173	1.30163e-05	0.015036	1.41956	4.66207	4.04424e-05	0.00113651
CTD-2540B15.10	0.385817	1.81893	0.0770855	0.458986	1.05364	5.04672	1.24283e-05	0.015036	0.619504	2.64561	0.0119312	0.0434738
TSPOAP1-AS1	-0.468051	-3.02376	0.00453536	0.345242	-0.76223	-5.00293	1.42248e-05	0.0151903	-1.00116	-5.85874	1.00155e-06	0.000186173
SERPINB2	1.25268	3.53865	0.00111119	0.300832	1.74483	5.00764	1.40198e-05	0.0151903	1.30038	3.32747	0.0020004	0.013813
RAB3IL1	0.700523	3.63223	0.000852566	0.300832	0.945879	4.98277	1.5136e-05	0.0154144	0.913005	4.28817	0.00012519	0.00229215
FOLR2	1.20996	3.58366	0.000978549	0.300832	1.65575	4.98233	1.51564e-05	0.0154144	1.12535	3.01919	0.0045904	0.0234605
OLR1	-1.22617	-2.70619	0.0102623	0.375623	-2.20366	-4.94122	1.72008e-05	0.0163644	-3.27579	-6.54893	1.17947e-07	0.000109602
NEK6	-0.67411	-2.72627	0.00975857	0.371033	-1.20306	-4.94323	1.70947e-05	0.0163644	-1.69318	-6.20282	3.44093e-07	0.000145524
RPL23P4	1.06995	4.2844	0.000126608	0.208002	1.21364	4.93744	1.74017e-05	0.0163644	1.5537	5.63566	2.00352e-06	0.000249334
RP6-99M1.3	-0.416818	-1.24995	0.219227	0.538981	-1.61721	-4.92714	1.79616e-05	0.0163644	-1.8896	-5.1329	9.52511e-06	0.000485519
ZNF366	-0.863323	-3.28565	0.00224356	0.320558	-1.27407	-4.92634	1.8006e-05	0.0163644	-1.27695	-4.40218	8.88992e-05	0.00185055
LRRC28	-0.689917	-3.61811	0.000887495	0.300832	-0.923218	-4.91896	1.84194e-05	0.0163914	-1.04186	-4.94927	1.67799e-05	0.000657571
SEMA3C	-0.631153	-3.5362	0.00111887	0.300832	-0.859648	-4.89336	1.99269e-05	0.016878	-1.13716	-5.77126	1.31448e-06	0.000207107
MIR222HG	-0.898145	-2.66887	0.0112629	0.382487	-1.61714	-4.88217	2.06237e-05	0.016878	-1.96297	-5.28375	5.97265e-06	0.000392495
PRLR	0.469879	3.02096	0.00456895	0.345781	0.748686	4.89039	2.01096e-05	0.016878	0.803146	4.67737	3.85996e-05	0.0011036
MYO7A	0.551505	3.18546	0.00294564	0.328535	0.83316	4.88917	2.0185e-05	0.016878	0.709475	3.712	0.000678907	0.00673604
IGFBP6	-0.687649	-2.63956	0.012111	0.386905	-1.25061	-4.87718	2.09419e-05	0.016878	-0.951871	-3.30971	0.00210042	0.0142661
IL2RG	-0.473775	-2.57765	0.0140994	0.394734	-0.870157	-4.80988	2.57436e-05	0.0170953	-1.34268	-6.61718	9.55668e-08	0.000109602
G0S2	-0.791157	-2.02826	0.0498344	0.447062	-1.86077	-4.8466	2.30024e-05	0.0170953	-2.80827	-6.52149	1.28371e-07	0.000109602
VSIG4	0.787671	1.89688	0.0657305	0.455988	1.95488	4.783	2.79523e-05	0.0170953	3.04426	6.64088	8.88382e-08	0.000109602
TNIP1	-0.551227	-2.49791	0.0171024	0.400271	-1.04723	-4.82138	2.48521e-05	0.0170953	-1.52416	-6.25638	2.91457e-07	0.00013541
GPAT3	-0.957492	-2.69315	0.0106021	0.379177	-1.6843	-4.81312	2.54889e-05	0.0170953	-2.34766	-5.98145	6.84019e-07	0.000183734
HIP1	-0.4323	-2.56969	0.014376	0.395692	-0.791414	-4.7795	2.82537e-05	0.0170953	-1.10083	-5.9274	8.09103e-07	0.000186173
KCNN4	-0.804288	-2.42123	0.0205297	0.412325	-1.55922	-4.76886	2.91881e-05	0.0170953	-2.03119	-5.5389	2.70618e-06	0.000279609
AQP9	-1.11715	-2.49269	0.0173181	0.401161	-2.13859	-4.84806	2.28996e-05	0.0170953	-2.73587	-5.52968	2.78485e-06	0.000282243
PTPN12	-0.606689	-2.76498	0.00885163	0.365913	-1.03545	-4.79445	2.69894e-05	0.0170953	-1.28193	-5.29223	5.81771e-06	0.000385875
MTF1	-0.406361	-2.18218	0.0355706	0.43571	-0.874881	-4.77323	2.88004e-05	0.0170953	-1.06148	-5.16346	8.66659e-06	0.000464887
PKD2L1	0.591137	3.32143	0.00203389	0.320558	0.835344	4.76855	2.92158e-05	0.0170953	1.01179	5.14961	9.04565e-06	0.000475847
RNASE1	1.17293	2.69008	0.0106835	0.379177	2.07154	4.82691	2.4434e-05	0.0170953	2.30544	4.78953	2.73988e-05	0.000900262
DTNBP1	-0.206122	-1.67154	0.103117	0.472882	-0.582263	-4.79729	2.67554e-05	0.0170953	-0.587537	-4.31595	0.000115194	0.00217333
GAL	-0.828322	-3.17568	0.00302438	0.328535	-1.24004	-4.83011	2.4196e-05	0.0170953	-1.2316	-4.27716	0.000129383	0.00233584
CD160	-0.422318	-3.04	0.004345	0.342022	-0.65643	-4.80071	2.64768e-05	0.0170953	-0.655229	-4.27242	0.000131228	0.00235714
RP11-641C17.1	1.39571	4.29647	0.000122117	0.208002	1.52471	4.76858	2.92139e-05	0.0170953	1.50515	4.19705	0.000164319	0.00271524
PDLIM7	-0.616013	-2.83838	0.00734375	0.365913	-1.02226	-4.78547	2.77416e-05	0.0170953	-0.994882	-4.1524	0.000187639	0.00295539
SYTL5	0.771844	3.8325	0.000479712	0.300832	0.952433	4.80475	2.61514e-05	0.0170953	0.914542	4.11342	0.00021062	0.00318465
ST3GAL6-AS1	-0.673137	-2.97952	0.00509473	0.35047	-1.07539	-4.83607	2.37577e-05	0.0170953	-1.00489	-4.02911	0.000270134	0.00375123
NPM1P50	0.645576	2.22177	0.0325455	0.430927	1.37184	4.79667	2.68062e-05	0.0170953	0.80276	2.50256	0.0169122	0.0545624
ITGAX	-0.713542	-2.79357	0.00823299	0.365913	-1.19357	-4.74758	3.11518e-05	0.0171523	-1.87432	-6.64708	8.71588e-08	0.000109602
SLC16A3	-0.663067	-2.81691	0.00775802	0.365913	-1.10252	-4.75867	3.01127e-05	0.0171523	-1.69587	-6.52611	1.26553e-07	0.000109602
FASLG	-0.412488	-2.36088	0.0236537	0.421277	-0.815619	-4.74279	3.16111e-05	0.0171523	-1.28675	-6.67122	8.09142e-08	0.000109602
NUMB	-0.666655	-3.00042	0.00482282	0.348573	-1.03696	-4.74164	3.17226e-05	0.0171523	-1.3532	-5.51684	2.89809e-06	0.000285483
VDR	-0.759919	-3.12577	0.0034584	0.338062	-1.13745	-4.75342	3.05997e-05	0.0171523	-1.39161	-5.18506	8.10665e-06	0.000449794
CSF2	-0.940754	-2.10211	0.0424627	0.443452	-2.09061	-4.74608	3.12945e-05	0.0171523	-2.05262	-4.15466	0.000186388	0.00294436
PLAUR	-0.87365	-2.56048	0.0147018	0.396258	-1.59087	-4.73699	3.21764e-05	0.0171802	-2.15467	-5.72023	1.54043e-06	0.000222315
CXXC5	-0.526222	-2.93818	0.00567549	0.355211	-0.833467	-4.72805	3.30674e-05	0.0172253	-1.08788	-5.50223	3.03267e-06	0.0002898
AKAP5	-0.544323	-3.18736	0.00293053	0.328535	-0.794951	-4.72933	3.29387e-05	0.0172253	-1.03605	-5.49547	3.09698e-06	0.000292026
ST6GALNAC4	-0.551396	-2.80841	0.00792796	0.365913	-0.910246	-4.7102	3.49204e-05	0.0177574	-1.06667	-4.92125	1.82902e-05	0.000695965
MS4A6E	0.543628	1.83045	0.075308	0.458878	1.3769	4.71025	3.49147e-05	0.0177574	1.58622	4.83802	2.36158e-05	0.000826843
OSM	-0.848134	-2.86277	0.00689831	0.363953	-1.36583	-4.68385	3.78446e-05	0.0177641	-2.05461	-6.28201	2.69205e-07	0.0001311
C1orf54	-0.677486	-2.47851	0.0179163	0.40358	-1.26592	-4.70522	3.54548e-05	0.0177641	-1.75137	-5.80385	1.18783e-06	0.000202104
HBEGF	-0.964851	-2.48165	0.017782	0.40358	-1.79304	-4.68548	3.76564e-05	0.0177641	-2.45768	-5.72604	1.51287e-06	0.00022207
PDK4	1.24653	2.44211	0.0195392	0.410322	2.35963	4.69666	3.63934e-05	0.0177641	3.17393	5.63257	2.02287e-06	0.000249334
IRAK2	-0.54005	-2.46156	0.0186564	0.407625	-1.012	-4.68641	3.75495e-05	0.0177641	-1.34485	-5.55263	2.59318e-06	0.000277359
AKAP8P1	0.632943	2.89224	0.0063936	0.360711	1.01094	4.69331	3.67677e-05	0.0177641	1.01711	4.21004	0.000158082	0.0026463
LINC00474	0.800009	2.72575	0.00977135	0.371033	1.35804	4.70098	3.59175e-05	0.0177641	1.01285	3.12595	0.00345669	0.0197106
FHL3	-0.550995	-3.29141	0.00220847	0.320558	-0.770292	-4.67491	3.88901e-05	0.0180564	-1.21065	-6.55088	1.17241e-07	0.000109602
MYOF	-0.815356	-2.39718	0.0217268	0.416969	-1.55295	-4.63869	4.34284e-05	0.0180689	-2.48286	-6.61231	9.70108e-08	0.000109602
FFAR2	-0.686856	-2.57704	0.0141204	0.394734	-1.22082	-4.65363	4.14965e-05	0.0180689	-1.84079	-6.25617	2.91648e-07	0.00013541
MOB3C	-0.387967	-2.26961	0.0291969	0.42725	-0.783338	-4.65575	4.12291e-05	0.0180689	-1.06405	-5.63854	1.98567e-06	0.000248005
SLC39A13	-0.470086	-3.51893	0.00117459	0.300832	-0.609998	-4.63922	4.33575e-05	0.0180689	-0.812071	-5.50648	2.99284e-06	0.0002898
CRIM1	-0.482286	-1.63576	0.110435	0.476197	-1.35539	-4.67047	3.94202e-05	0.0180689	-1.69607	-5.21082	7.48571e-06	0.000429198
ITPRIP	-0.409717	-2.58684	0.0137864	0.394206	-0.723847	-4.64319	4.28367e-05	0.0180689	-0.896167	-5.12534	9.75028e-06	0.000492159
BHLHE41	-0.862939	-3.4122	0.00158279	0.307213	-1.15637	-4.64552	4.25345e-05	0.0180689	-1.22472	-4.38671	9.31367e-05	0.00190716
LINC01100	0.463984	1.71296	0.0951531	0.467236	1.24255	4.66058	4.06266e-05	0.0180689	1.28351	4.29232	0.000123642	0.00227253
RP1-288L1.5	0.802765	2.76253	0.00890674	0.366097	1.32645	4.63762	4.35701e-05	0.0180689	1.29724	4.04376	0.000258734	0.00364746
MSC-AS1	-0.740872	-3.2363	0.00256665	0.325008	-1.04539	-4.63946	4.33263e-05	0.0180689	-0.988298	-3.91059	0.000382292	0.00465818
TMEM236	0.598681	3.56122	0.00104265	0.300832	0.768783	4.64612	4.24568e-05	0.0180689	0.701349	3.77907	0.000559831	0.0059682
HK3	-0.814764	-3.36033	0.00182725	0.320558	-1.10086	-4.61284	4.69824e-05	0.0182574	-1.89164	-7.06702	2.40604e-08	0.000109602
MATK	-0.696786	-2.69771	0.010482	0.378578	-1.17412	-4.6184	4.61943e-05	0.0182574	-1.84756	-6.4795	1.4614e-07	0.000109602
SLC7A11	-1.00174	-1.71788	0.0942418	0.467236	-2.63374	-4.58873	5.05551e-05	0.0182574	-4.15434	-6.45336	1.58431e-07	0.000109602
SPRY2	-0.715882	-2.41075	0.021044	0.413666	-1.34713	-4.60896	4.75402e-05	0.0182574	-1.8608	-5.67619	1.76638e-06	0.00023505
AHCYL1	-0.497175	-2.86315	0.00689157	0.363953	-0.785693	-4.59696	4.93066e-05	0.0182574	-1.07786	-5.62267	2.08608e-06	0.000255321
PDE4DIP	-0.503863	-2.08731	0.0438582	0.44439	-1.09417	-4.60512	4.80989e-05	0.0182574	-1.47688	-5.54199	2.68035e-06	0.000279247
RP11-389C8.2	-0.863491	-3.11855	0.00352581	0.338618	-1.25415	-4.60182	4.85829e-05	0.0182574	-1.65074	-5.40036	4.1605e-06	0.000329104
ITGA5	-0.632398	-3.23557	0.00257176	0.325008	-0.886564	-4.60844	4.76147e-05	0.0182574	-1.1258	-5.21757	7.331e-06	0.000424503
TNFSF14	-0.683037	-2.63669	0.0121971	0.386905	-1.17024	-4.58959	5.04237e-05	0.0182574	-1.47582	-5.16056	8.74469e-06	0.000465922
FGR	-0.681096	-2.92395	0.00588948	0.357259	-1.06035	-4.62483	4.52997e-05	0.0182574	-1.29988	-5.05492	1.21182e-05	0.0005548
LRCH1	-0.389046	-2.52297	0.0161008	0.400271	-0.699825	-4.61088	4.72632e-05	0.0182574	-0.856914	-5.0338	1.29337e-05	0.000577889
TSPAN13	-0.438876	-2.02755	0.0499106	0.447062	-0.978557	-4.59303	4.98994e-05	0.0182574	-1.19819	-5.01422	1.3738e-05	0.00059687
FCRL3	-0.516393	-2.34383	0.0246111	0.424845	-0.99347	-4.58124	5.17183e-05	0.0182574	-1.21792	-5.00738	1.40311e-05	0.000605392
CRABP2	-1.01022	-2.20952	0.0334564	0.432867	-2.06896	-4.59747	4.92299e-05	0.0182574	-2.50868	-4.97022	1.5732e-05	0.000640828
DAGLA	-0.554282	-3.08405	0.00386574	0.338618	-0.813936	-4.60114	4.86839e-05	0.0182574	-0.937201	-4.72359	3.35214e-05	0.00101457
RSL24D1P8	0.781684	2.60389	0.0132225	0.391172	1.35414	4.58289	5.14605e-05	0.0182574	1.4772	4.45737	7.52673e-05	0.00167706
NR4A3	-0.7842	-2.8138	0.00781973	0.365913	-1.25681	-4.58161	5.16601e-05	0.0182574	-1.29801	-4.21884	0.000153994	0.0026086
CTB-133P21.1	0.636431	2.74126	0.00939758	0.369421	1.04697	4.58159	5.16641e-05	0.0182574	0.822181	3.20785	0.00277263	0.0171232
TRAF1	-0.499997	-2.64082	0.0120733	0.386905	-0.8449	-4.53378	5.97302e-05	0.0183024	-1.33194	-6.3724	2.035e-07	0.00011975
KMO	-0.586488	-2.00601	0.0522646	0.449167	-1.31449	-4.56789	5.38587e-05	0.0183024	-1.97127	-6.10757	4.62379e-07	0.000157953
COL8A2	-0.560174	-2.26035	0.0298199	0.428777	-1.11071	-4.55343	5.62753e-05	0.0183024	-1.63124	-5.96236	7.25822e-07	0.000184037
FOSL2	-0.541211	-2.60996	0.0130271	0.391063	-0.929767	-4.55538	5.59423e-05	0.0183024	-1.34643	-5.88166	9.32675e-07	0.000186173
ZC3H12A	-0.459938	-2.2523	0.0303716	0.428972	-0.912815	-4.54143	5.83606e-05	0.0183024	-1.32147	-5.86179	9.92074e-07	0.000186173
CD82	-0.492544	-2.33534	0.0251004	0.425091	-0.943581	-4.54535	5.76705e-05	0.0183024	-1.30147	-5.58969	2.31119e-06	0.000268054
HMGCR	-0.48993	-2.5114	0.0165565	0.400271	-0.874146	-4.55249	5.64356e-05	0.0183024	-1.19992	-5.57163	2.44459e-06	0.000273647
ASAP1	-0.584799	-3.0918	0.00378683	0.338618	-0.842922	-4.52768	6.08438e-05	0.0183024	-1.1586	-5.54865	2.62546e-06	0.000277359
LINC01010	-0.927605	-2.2592	0.0298984	0.428777	-1.84286	-4.56002	5.51604e-05	0.0183024	-2.41894	-5.33659	5.07039e-06	0.000366057
HK2	-0.65241	-2.65834	0.0115609	0.385465	-1.09633	-4.53852	5.88779e-05	0.0183024	-1.42489	-5.2592	6.44452e-06	0.000400397
RP11-259G18.2	1.426	4.23666	0.000146023	0.210792	1.51065	4.55985	5.51899e-05	0.0183024	1.93807	5.2158	7.37118e-06	0.00042523
CCDC88A	-0.679925	-3.29758	0.00217143	0.320558	-0.925901	-4.56229	5.47817e-05	0.0183024	-1.16201	-5.10496	1.03839e-05	0.000506334
TBC1D17	-0.454763	-3.06849	0.004029	0.342022	-0.667445	-4.57551	5.26271e-05	0.0183024	-0.818534	-5.00293	1.42245e-05	0.000606809
DOT1L	-0.367295	-2.71233	0.0101056	0.372764	-0.604783	-4.53744	5.90705e-05	0.0183024	-0.687625	-4.59967	4.89022e-05	0.00127681
TSC22D1	-0.618256	-2.48002	0.0178517	0.40358	-1.1185	-4.55833	5.54448e-05	0.0183024	-1.25952	-4.57657	5.24585e-05	0.00132825
RP11-1080G15.2	1.24248	5.28068	6.02975e-06	0.0948454	1.05229	4.54377	5.79481e-05	0.0183024	1.14036	4.39026	9.21479e-05	0.00189574
RP11-526K17.2	0.873074	3.69996	0.000702717	0.300832	1.05174	4.52832	6.07263e-05	0.0183024	1.07095	4.11114	0.000212049	0.00319721
RPL5P25	0.899768	3.95183	0.000338901	0.280409	1.02425	4.57044	5.34435e-05	0.0183024	0.86819	3.45406	0.00140865	0.0109322
AC083843.2	0.646158	3.26984	0.00234255	0.321291	0.88316	4.54058	5.85115e-05	0.0183024	0.737731	3.38169	0.00172251	0.0125067
RP5-943J3.2	0.803658	3.55533	0.00106014	0.300832	1.00917	4.53581	5.93633e-05	0.0183024	0.730007	2.92538	0.00586759	0.0276274
FTLP12	1.76657	4.85611	2.23408e-05	0.159048	1.62127	4.52792	6.07996e-05	0.0183024	1.05912	2.63725	0.0121803	0.0440806
RP11-848P1.9	0.531107	4.20007	0.00016285	0.210792	0.562432	4.51885	6.24939e-05	0.0184098	0.61851	4.43066	8.15858e-05	0.00176335
EREG	-0.987319	-2.559	0.0147551	0.396665	-1.71629	-4.51945	6.23803e-05	0.0184098	-1.84068	-4.32154	0.000113278	0.00214861
TMEM37	0.782017	2.18714	0.0351786	0.43571	1.59172	4.52284	6.17428e-05	0.0184098	1.47304	3.73183	0.000641351	0.00649025
CCL7	-1.2553	-3.5844	0.000976507	0.300832	-1.55576	-4.51332	6.355e-05	0.0185927	-1.73175	-4.47922	7.04572e-05	0.00161026
CDK14	-0.502226	-1.99287	0.0537476	0.449602	-1.11739	-4.50474	6.5223e-05	0.0186306	-1.60233	-5.7594	1.36382e-06	0.000208045
MREG	-0.778643	-2.13962	0.0390996	0.441019	-1.61447	-4.50726	6.47271e-05	0.0186306	-2.2972	-5.71801	1.55111e-06	0.000222334
DCSTAMP	-1.11542	-2.21732	0.032874	0.430927	-2.22497	-4.49364	6.74497e-05	0.0186306	-3.01864	-5.43561	3.72943e-06	0.000313931
C3	-0.51288	-1.64531	0.108441	0.475914	-1.38047	-4.49927	6.63104e-05	0.0186306	-1.69748	-4.93268	1.76586e-05	0.000678316
TNFAIP3	-0.524964	-2.13214	0.0397505	0.442603	-1.08919	-4.49441	6.72941e-05	0.0186306	-1.23917	-4.55894	5.53421e-05	0.00137678
IL4	-0.82021	-3.50216	0.00123122	0.300832	-1.037	-4.49856	6.64538e-05	0.0186306	-1.16461	-4.50443	6.52825e-05	0.00153597
JUN	-0.725737	-3.39908	0.00164146	0.307213	-0.947093	-4.5067	6.48362e-05	0.0186306	-1.01197	-4.29335	0.000123264	0.00227033
CTC-229L21.1	1.15604	2.89707	0.00631438	0.360705	1.76883	4.50357	6.54531e-05	0.0186306	1.53701	3.48909	0.00127719	0.0102531
FGF13-AS1	0.950317	2.88656	0.00648821	0.361335	1.45589	4.49288	6.76049e-05	0.0186306	1.25181	3.44426	0.00144767	0.0111365
CTD-2547L24.3	-0.441628	-2.33754	0.0249726	0.425091	-0.830958	-4.46854	7.27679e-05	0.0186926	-1.3287	-6.37057	2.04652e-07	0.00011975
MRC2	-0.305408	-2.1705	0.0365103	0.436686	-0.617327	-4.45736	7.52693e-05	0.0186926	-0.98395	-6.33431	2.28958e-07	0.000126135
AC005355.1	1.33298	4.30076	0.000120557	0.208002	1.36344	4.46931	7.25997e-05	0.0186926	2.13346	6.23524	3.11196e-07	0.000139923
CLEC5A	-1.01038	-2.22266	0.0324802	0.430927	-1.99486	-4.45846	7.50185e-05	0.0186926	-2.90041	-5.77956	1.281e-06	0.000206181
ETV6	-0.382181	-2.18065	0.0356928	0.43571	-0.772976	-4.48091	7.00987e-05	0.0186926	-1.11011	-5.73757	1.45959e-06	0.000218759
RGCC	-0.88113	-2.63196	0.0123404	0.387873	-1.47132	-4.4651	7.35293e-05	0.0186926	-2.09506	-5.66871	1.80794e-06	0.000237619
ZMIZ2	-0.3791	-2.3892	0.022138	0.417495	-0.6989	-4.47504	7.13527e-05	0.0186926	-0.947856	-5.41113	4.02378e-06	0.000326634
EGR2	-0.8971	-2.04257	0.0483241	0.44684	-1.92721	-4.4581	7.51001e-05	0.0186926	-2.57704	-5.31501	5.42115e-06	0.000374666
TGFBR3	-0.401912	-2.86306	0.00689311	0.363953	-0.617955	-4.47239	7.19269e-05	0.0186926	-0.822685	-5.30861	5.52984e-06	0.000378537
SREBF2	-0.427862	-2.50599	0.0167735	0.400271	-0.751642	-4.4727	7.18593e-05	0.0186926	-0.958998	-5.08792	1.09446e-05	0.000519443
ABCC1	-0.368939	-2.26783	0.0293163	0.427393	-0.717227	-4.47914	7.04735e-05	0.0186926	-0.855835	-4.76532	2.95061e-05	0.000941011
CYP27B1	-0.765464	-2.45711	0.0188548	0.408617	-1.37555	-4.48603	6.90219e-05	0.0186926	-1.52315	-4.42884	8.20334e-05	0.00176627
LINC00426	0.424095	2.80078	0.00808337	0.365913	0.664718	4.46003	7.46646e-05	0.0186926	0.703211	4.20678	0.000159627	0.00266211
OOEP-AS1	0.88778	2.75774	0.0090152	0.366097	1.4212	4.48524	6.91872e-05	0.0186926	1.4634	4.11773	0.000207951	0.00315839
ACSL1	-0.711664	-3.13476	0.00337605	0.33564	-1.00314	-4.48927	6.83483e-05	0.0186926	-1.00359	-4.00436	0.000290533	0.00392921
RP11-1193F23.1	0.167135	0.974786	0.336045	0.622847	0.754012	4.4679	7.29094e-05	0.0186926	0.647677	3.42174	0.00154136	0.0115975
C1QB	0.814135	2.98087	0.00507682	0.350333	1.1988	4.45939	7.48092e-05	0.0186926	0.729509	2.41949	0.0206142	0.0622112
BTG2	-0.53224	-2.9737	0.00517303	0.35047	-0.782027	-4.4391	7.95346e-05	0.0188657	-1.31508	-6.65563	8.48928e-08	0.000109602
CCL4	-0.712365	-1.78059	0.0832551	0.460679	-1.74751	-4.43775	7.98589e-05	0.0188657	-2.61417	-5.91891	8.30718e-07	0.000186173
ATP1A1	-0.519693	-2.63664	0.0121987	0.386905	-0.86096	-4.43783	7.98404e-05	0.0188657	-1.2463	-5.72761	1.50551e-06	0.000221751
IL27RA	-0.498256	-2.45401	0.0189945	0.408708	-0.889014	-4.44854	7.73014e-05	0.0188657	-1.2373	-5.52012	2.86878e-06	0.000284043
AC093609.1	0.202673	1.38721	0.173739	0.507835	0.637851	4.43558	8.0383e-05	0.0188657	0.770355	4.77624	2.85369e-05	0.000922749
BTG3	-0.380229	-1.90666	0.0644131	0.455813	-0.870908	-4.43694	8.00543e-05	0.0188657	-1.00447	-4.56261	5.47283e-05	0.00136709
RP4-738P11.3	-0.508781	-2.64583	0.0119248	0.386763	-0.842153	-4.44944	7.70901e-05	0.0188657	-0.948018	-4.46575	7.33844e-05	0.00164893
MIR3142HG	-0.404253	-1.89947	0.0653801	0.455988	-0.932093	-4.4496	7.7053e-05	0.0188657	-0.981152	-4.17602	0.000174928	0.00282604
AC092614.2	0.214702	1.26239	0.214768	0.5365	0.743509	4.44146	7.89698e-05	0.0188657	0.711382	3.78884	0.000544266	0.00586487
DUSP8P3	1.17496	3.55673	0.00105595	0.300832	1.44268	4.4369	8.00637e-05	0.0188657	1.3503	3.70259	0.000697461	0.00684387
ARHGAP10	-0.463075	-2.32846	0.0255036	0.425091	-0.867526	-4.43184	8.12963e-05	0.0189758	-1.22973	-5.60113	2.23046e-06	0.000263918
RP11-574O16.1	1.32678	4.23437	0.000147024	0.210792	1.36512	4.42634	8.26555e-05	0.0191882	1.69928	4.9125	1.87884e-05	0.000706467
ITGAM	-0.63693	-3.08513	0.00385474	0.338618	-0.898523	-4.42175	8.38084e-05	0.0192066	-1.60705	-7.05113	2.52553e-08	0.000109602
RHOC	-0.683871	-2.64512	0.0119458	0.386856	-1.12279	-4.41219	8.62578e-05	0.0192066	-1.55599	-5.45162	3.54871e-06	0.000306534
AC008069.2	0.949661	4.31382	0.000115932	0.208002	0.957767	4.42014	8.42139e-05	0.0192066	1.12429	4.62613	4.51204e-05	0.00121757
MSANTD3	-0.585016	-2.56369	0.0145876	0.396258	-0.990805	-4.41133	8.64812e-05	0.0192066	-1.13795	-4.5172	6.28065e-05	0.00150214
HCAR2	-0.927018	-2.40755	0.0212031	0.41497	-1.67106	-4.40925	8.7026e-05	0.0192066	-1.78079	-4.18935	0.000168125	0.0027568
PDSS1	-0.344505	-2.14938	0.038264	0.440514	-0.696159	-4.41276	8.61088e-05	0.0192066	-0.714495	-4.03799	0.000263168	0.00368565
SLC1A2	-0.532244	-2.68399	0.0108469	0.379489	-0.860465	-4.40846	8.72311e-05	0.0192066	-0.733887	-3.35233	0.00186805	0.0132197
RP11-404F10.5	1.08104	3.4816	0.00130427	0.301693	1.34936	4.41518	8.5483e-05	0.0192066	1.02555	2.99188	0.00493226	0.0245893
PPARG	-0.55438	-2.85979	0.00695129	0.364944	-0.842971	-4.41797	8.47683e-05	0.0192066	-0.634324	-2.96404	0.0053053	0.0258193
RP11-327F22.4	-0.364451	-2.72105	0.00988714	0.372436	-0.581233	-4.40892	8.71118e-05	0.0192066	-0.316814	-2.14264	0.0388391	0.0947007
IL1RN	-1.09425	-2.00451	0.0524314	0.449167	-2.36542	-4.40236	8.88492e-05	0.0194625	-3.40923	-5.65713	1.87418e-06	0.000242592
CSF1	-1.14381	-2.22555	0.0322689	0.430927	-2.22499	-4.3984	8.9917e-05	0.0195959	-3.11064	-5.48252	3.22408e-06	0.000295529
PTPRE	-0.643667	-2.06515	0.0460223	0.444944	-1.34742	-4.39215	9.16246e-05	0.0197953	-1.99699	-5.80383	1.18792e-06	0.000202104
CD44	-0.443788	-1.9256	0.0619257	0.455813	-0.995841	-4.38999	9.22221e-05	0.0197953	-1.40955	-5.54011	2.69602e-06	0.000279516
SLC25A5P4	0.804637	3.00748	0.00473417	0.348216	1.15626	4.39079	9.20012e-05	0.0197953	1.02999	3.48725	0.00128378	0.0102729
G6PD	-0.58554	-2.79319	0.00824099	0.365913	-0.902545	-4.37418	9.67153e-05	0.020656	-1.24019	-5.35893	4.73104e-06	0.00035207
TIMP1	-0.532531	-2.49903	0.0170565	0.400271	-0.916048	-4.36745	9.86928e-05	0.0208029	-1.50598	-6.40166	1.85886e-07	0.000114675
FMNL3	-0.365368	-1.77157	0.0847652	0.461395	-0.886457	-4.36687	9.88643e-05	0.0208029	-1.39887	-6.14404	4.12907e-07	0.000154586
DOCK5	-0.350635	-2.5213	0.0161659	0.400271	-0.598198	-4.37016	9.78906e-05	0.0208029	-0.679927	-4.42872	8.20632e-05	0.00176627
HSD11B1	-1.24876	-2.00677	0.0521798	0.449167	-2.67233	-4.36307	0.0001	0.0209388	-4.11636	-5.99209	6.61791e-07	0.000183734
TRAF2	-0.458019	-2.36693	0.0233221	0.421277	-0.829671	-4.35604	0.000102135	0.0211781	-1.1209	-5.24706	6.69145e-06	0.000408322
THCAT158	0.775755	3.0376	0.00437263	0.342022	1.09499	4.35613	0.000102106	0.0211781	1.08809	3.85938	0.00044372	0.00512118
LIMS1	-0.597415	-2.68839	0.0107287	0.379177	-0.951927	-4.35215	0.000103336	0.0212129	-1.26979	-5.17601	8.33678e-06	0.000457132
STARD4	-0.680707	-2.6529	0.0117177	0.385767	-1.09937	-4.35302	0.000103066	0.0212129	-1.43853	-5.07843	1.12702e-05	0.000531908
MAP2K3	-0.346484	-2.28072	0.0284655	0.425091	-0.650558	-4.35068	0.000103793	0.0212129	-0.726763	-4.33339	0.000109323	0.002104
IKBKE	-0.390834	-1.82577	0.0760259	0.458986	-0.915794	-4.34645	0.000105118	0.0213815	-1.45433	-6.15411	4.00208e-07	0.000152711
GPR68	-0.509116	-1.58685	0.121121	0.48052	-1.36956	-4.33695	0.000108162	0.0216908	-2.19774	-6.20504	3.41738e-07	0.000145524
PLD4	-0.23171	-1.56162	0.126956	0.482707	-0.6336	-4.3384	0.000107691	0.0216908	-0.642443	-3.92205	0.00036972	0.00456961
RP3-468K18.6	-0.161112	-0.88204	0.383493	0.657422	-0.779959	-4.33826	0.000107735	0.0216908	-0.314174	-1.55804	0.127802	0.21811
NR1H3	-0.461101	-1.89494	0.0659954	0.455988	-1.03561	-4.32393	0.00011247	0.0219468	-1.60889	-5.98926	6.67633e-07	0.000183734
CXCL8	-1.17962	-1.7381	0.0905743	0.464372	-2.88631	-4.32074	0.000113549	0.0219468	-4.44177	-5.92837	8.06654e-07	0.000186173
ST3GAL6	-0.456739	-3.01578	0.00463185	0.347623	-0.644865	-4.32597	0.000111782	0.0219468	-0.882682	-5.27938	6.05398e-06	0.000394631
RP11-20G13.2	-0.91843	-1.9065	0.0644343	0.455813	-2.05212	-4.32789	0.000111142	0.0219468	-2.65462	-4.99161	1.47294e-05	0.000620886
CXorf40A	-0.299824	-2.02848	0.0498112	0.447062	-0.628763	-4.3219	0.000113156	0.0219468	-0.751886	-4.60791	4.76926e-05	0.00126064
PHLDA3	-0.881756	-2.75019	0.00918854	0.368268	-1.3643	-4.32322	0.00011271	0.0219468	-1.59678	-4.51134	6.39314e-05	0.00151544
MTND2P8	0.71198	2.24722	0.0307236	0.429556	1.34873	4.325	0.000112108	0.0219468	1.20323	3.44012	0.00146448	0.0112227
MIR24-2	-0.511304	-3.06013	0.00411937	0.342022	-0.711024	-4.32344	0.000112634	0.0219468	-0.606256	-3.28674	0.00223687	0.0148632
CD276	-0.67882	-2.62329	0.0126069	0.389854	-1.09899	-4.31489	0.000115559	0.0222347	-1.56363	-5.4736	3.31458e-06	0.000299962
CD83	-0.706047	-1.91686	0.063063	0.455813	-1.56342	-4.31236	0.000116438	0.0223034	-2.72182	-6.69365	7.55188e-08	0.000109602
MIOX	0.434303	2.18208	0.0355786	0.43571	0.84354	4.30594	0.000118699	0.0223529	1.12263	5.10931	1.02453e-05	0.000503021
PPARD	-0.490372	-2.78037	0.00851357	0.365913	-0.747761	-4.30748	0.000118154	0.0223529	-0.964024	-4.95122	1.66797e-05	0.000656197
RP11-1008C21.1	-0.901934	-2.36648	0.0233464	0.421277	-1.61612	-4.30812	0.000117929	0.0223529	-1.74561	-4.14881	0.00018965	0.00297609
AC018866.1	0.523902	2.4122	0.0209719	0.413666	0.920438	4.30569	0.00011879	0.0223529	0.813753	3.39394	0.00166504	0.0122203
SPHK1	-0.82721	-2.25316	0.030312	0.428972	-1.55509	-4.30344	0.000119593	0.0224054	-2.00832	-4.95515	1.64793e-05	0.000654193
MFSD7	-0.466499	-2.68262	0.0108841	0.379489	-0.733479	-4.28528	0.000126274	0.0225908	-1.18462	-6.17072	3.80105e-07	0.00014959
CHI3L1	-1.1632	-2.27165	0.0290613	0.426011	-2.16055	-4.28683	0.000125691	0.0225908	-3.42999	-6.06775	5.23216e-07	0.000170656
KYNU	-0.604717	-2.13466	0.0395299	0.442501	-1.19538	-4.28714	0.000125573	0.0225908	-1.85057	-5.91741	8.34617e-07	0.000186173
SUSD6	-0.458579	-2.0939	0.0432315	0.443614	-0.924588	-4.28918	0.00012481	0.0225908	-1.33658	-5.52822	2.79747e-06	0.000282243
MOB1B	-0.459951	-2.2892	0.0279175	0.425091	-0.847361	-4.28474	0.000126478	0.0225908	-1.07932	-4.866	2.16734e-05	0.000779933
DHCR24	-0.492967	-1.94304	0.0597083	0.454752	-1.06969	-4.28356	0.000126929	0.0225908	-1.34923	-4.81723	2.51698e-05	0.000857359
AC006960.7	0.889965	4.32572	0.000111867	0.208002	0.869541	4.29397	0.000123032	0.0225908	0.99968	4.40143	8.90988e-05	0.0018538
CSRNP1	-0.648862	-3.08109	0.00389639	0.338618	-0.889545	-4.29144	0.000123968	0.0225908	-0.88558	-3.80914	0.000513266	0.00564183
CTB-49A3.2	0.699459	3.53994	0.00110715	0.300832	0.833518	4.28581	0.000126078	0.0225908	0.823423	3.77489	0.000566619	0.00601619
ITSN1	0.380816	2.23675	0.0314617	0.430302	0.717886	4.28393	0.000126788	0.0225908	0.649366	3.45494	0.00140519	0.0109132
AC018442.1	0.426705	2.19505	0.0345614	0.434947	0.820315	4.28726	0.00012553	0.0225908	0.738579	3.4416	0.00145847	0.0111949
IGF1	0.853652	3.31625	0.00206304	0.320558	1.08552	4.28438	0.000126616	0.0225908	0.684792	2.40976	0.0210932	0.0631304
LSP1	-0.464874	-2.62545	0.0125401	0.388834	-0.745432	-4.2772	0.000129365	0.022834	-1.38195	-7.06981	2.38567e-08	0.000109602
LDLR	-0.472062	-2.05179	0.0473726	0.44684	-0.968657	-4.27747	0.00012926	0.022834	-1.35904	-5.35073	4.85287e-06	0.000358014
IL4R	-0.434734	-2.07783	0.0447724	0.44458	-0.879694	-4.27172	0.000131502	0.022989	-1.55537	-6.73392	6.67234e-08	0.000109602
MTND5P10	0.376304	1.45332	0.15463	0.497543	1.08844	4.27082	0.000131858	0.022989	0.730346	2.55504	0.0148978	0.0502296
CHCHD6	0.490731	4.46471	7.36168e-05	0.204752	0.46215	4.27185	0.00013145	0.022989	0.167952	1.38415	0.174668	0.273434
RAB13	-0.509155	-2.57605	0.0141546	0.395172	-0.82997	-4.2663	0.000133653	0.0232072	-0.985772	-4.51782	6.2689e-05	0.00150214
SLC43A3	-0.462664	-1.88444	0.0674405	0.456791	-1.0303	-4.26348	0.000134781	0.0233084	-1.58001	-5.82939	1.09718e-06	0.000194465
PTGES3P1	-0.646551	-2.818	0.00773645	0.365913	-0.962472	-4.26197	0.000135394	0.02332	-1.36894	-5.40466	4.10536e-06	0.000328391
SLC7A11-AS1	-0.662297	-2.83977	0.00731767	0.365913	-0.977224	-4.25704	0.000137401	0.0235706	-0.835873	-3.24652	0.00249632	0.0159531
ACO1	-0.440282	-2.45109	0.0191269	0.40883	-0.752006	-4.25337	0.000138916	0.0236727	-0.974621	-4.91487	1.86525e-05	0.000703618
TNFRSF12A	-0.582289	-2.0292	0.0497343	0.447062	-1.20121	-4.25292	0.000139105	0.0236727	-1.38881	-4.38405	9.3884e-05	0.0019169
CCL24	-1.53778	-1.98937	0.0541486	0.449781	-3.23325	-4.24957	0.000140502	0.0237215	-4.99643	-5.85503	1.01314e-06	0.000186173
PAPSS1	-0.54511	-2.64821	0.0118548	0.385769	-0.861011	-4.24972	0.000140441	0.0237215	-1.27728	-5.62082	2.09807e-06	0.000255325
NEMP1	-0.617256	-3.27812	0.00229022	0.321291	-0.786597	-4.24419	0.000142777	0.0237542	-0.92464	-4.44815	7.73917e-05	0.00170753
CTD-2589M5.4	0.911161	3.16952	0.00307499	0.328535	1.20132	4.24561	0.000142174	0.0237542	1.27641	4.02194	0.000275898	0.00379714
AC018641.7	1.04837	2.93623	0.00570442	0.355211	1.49142	4.24385	0.00014292	0.0237542	1.28221	3.253	0.00245265	0.0157874
MS4A6A	0.940024	2.98949	0.00496331	0.350046	1.31391	4.24529	0.00014231	0.0237542	0.789809	2.27524	0.0288239	0.0773185
ZFYVE16	-0.691602	-2.78337	0.00844901	0.365913	-1.03672	-4.23897	0.000145018	0.0240095	-1.4587	-5.31775	5.37539e-06	0.000374567
RP11-287D1.2	0.895024	4.07852	0.000233521	0.224261	0.91521	4.23714	0.000145815	0.0240482	0.791979	3.2691	0.00234729	0.0153555
LPCAT2	-0.547825	-2.33727	0.0249883	0.425091	-0.974346	-4.22342	0.000151904	0.0240617	-1.68535	-6.51335	1.31637e-07	0.000109602
PRCD	0.611766	3.21861	0.00269295	0.328535	0.791767	4.23218	0.000147988	0.0240617	1.26062	6.00778	6.30314e-07	0.000181203
PDXK	-0.426763	-2.40756	0.0212027	0.41497	-0.738318	-4.23173	0.000148188	0.0240617	-1.07042	-5.47003	3.35148e-06	0.000300123
GNA12	-0.344794	-2.10717	0.0419944	0.443248	-0.680394	-4.22459	0.000151375	0.0240617	-0.946711	-5.24089	6.82036e-06	0.000409912
CLEC6A	-0.850185	-1.92725	0.0617121	0.455813	-1.83696	-4.23066	0.000148662	0.0240617	-2.55259	-5.24147	6.80808e-06	0.000409912
SCARF1	-0.639203	-2.71548	0.0100262	0.372436	-0.979428	-4.22731	0.000150151	0.0240617	-1.33482	-5.13662	9.41642e-06	0.000482281
RASGEF1B	-0.751494	-3.2899	0.0022176	0.320558	-0.949823	-4.22458	0.00015138	0.0240617	-1.20961	-4.79679	2.67968e-05	0.000892309
RP11-286N22.16	1.09859	4.4581	7.51016e-05	0.204752	1.02429	4.223	0.000152093	0.0240617	1.26158	4.63743	4.35953e-05	0.00119754
OPN3	-0.316585	-2.24189	0.0310973	0.429556	-0.587787	-4.2289	0.00014944	0.0240617	-0.708042	-4.54183	5.82896e-05	0.00142615
UPP1	-0.581683	-2.78082	0.00850369	0.365913	-0.869786	-4.22458	0.000151379	0.0240617	-1.03355	-4.47574	7.1203e-05	0.00162037
RP11-688I9.5	0.478453	2.33215	0.0252866	0.425091	0.854019	4.2293	0.000149263	0.0240617	0.609892	2.69288	0.0106091	0.0403385
LGALS9	-0.514333	-2.7972	0.00815731	0.365913	-0.760004	-4.19933	0.000163209	0.0241675	-1.37977	-6.79725	5.49277e-08	0.000109602
FLNA	-0.441675	-2.19138	0.0348462	0.435603	-0.834817	-4.20815	0.000158978	0.0241675	-1.40279	-6.30458	2.51034e-07	0.000128892
PTPN6	-0.436447	-2.49973	0.0170276	0.400271	-0.721763	-4.19992	0.000162922	0.0241675	-1.20743	-6.26431	2.84384e-07	0.000134972
FNDC3B	-0.492749	-2.64233	0.0120282	0.386887	-0.770537	-4.19797	0.00016387	0.0241675	-1.19253	-5.79266	1.2299e-06	0.000203625
HMG20B	-0.585789	-2.54278	0.0153475	0.399494	-0.956764	-4.21946	0.000153708	0.0241675	-1.41014	-5.5447	2.65788e-06	0.000278605
ST6GALNAC6	-0.358912	-2.45927	0.0187584	0.407909	-0.603635	-4.20219	0.000161823	0.0241675	-0.809334	-5.02334	1.33573e-05	0.000587631
ATF3	-0.989716	-2.11318	0.0414447	0.443248	-1.9424	-4.21354	0.000156443	0.0241675	-2.58834	-5.00603	1.40892e-05	0.000606064
ZNF697	-0.770928	-2.37624	0.02282	0.419579	-1.34723	-4.21893	0.000153953	0.0241675	-1.73396	-4.84133	2.33775e-05	0.000820518
SLC12A6	-0.464992	-3.33949	0.00193535	0.320558	-0.578027	-4.21761	0.00015456	0.0241675	-0.737986	-4.80098	2.64548e-05	0.000886984
MAGEA11	1.06641	4.13362	0.00019839	0.224261	1.06843	4.20764	0.000159217	0.0241675	1.35891	4.77139	2.8963e-05	0.000930893
SELENON	-0.450665	-3.41728	0.00156062	0.307213	-0.545107	-4.19944	0.000163152	0.0241675	-0.673552	-4.62643	4.50801e-05	0.00121757
MAFF	-0.863375	-2.58731	0.0137708	0.394206	-1.38336	-4.2118	0.000157256	0.0241675	-1.69783	-4.60883	4.75587e-05	0.00125877
XCL2	-0.370059	-1.38869	0.173293	0.507726	-1.10097	-4.19754	0.000164078	0.0241675	-1.34842	-4.58361	5.13484e-05	0.00131181
RASGRP3	-0.562707	-3.42725	0.00151792	0.307213	-0.681099	-4.21461	0.000155947	0.0241675	-0.799942	-4.41336	8.59535e-05	0.00181219
SH3PXD2B	0.767805	4.57581	5.25797e-05	0.204752	0.693441	4.19865	0.000163538	0.0241675	0.799692	4.31705	0.000114814	0.00217195
SLC6A6	-0.548061	-2.95398	0.00544654	0.352943	-0.767952	-4.2053	0.000160332	0.0241675	-0.873643	-4.26541	0.000134009	0.00238707
RP11-203J24.9	-0.455743	-2.31829	0.0261101	0.425091	-0.814287	-4.20832	0.000158895	0.0241675	-0.91859	-4.2327	0.000147759	0.00253341
MYLK-AS2	0.806735	3.22734	0.00262989	0.328535	1.03542	4.20836	0.000158875	0.0241675	1.12353	4.07144	0.000238455	0.00345274
ALDH1A2	-0.942365	-2.46588	0.0184648	0.405572	-1.5846	-4.21266	0.000156856	0.0241675	-1.54758	-3.66821	0.000769499	0.00728645
TPRG1LP1	1.24148	3.04396	0.00429969	0.342022	1.68804	4.20501	0.000160469	0.0241675	1.19415	2.65221	0.0117379	0.0430122
ATP1B1	-0.505229	-2.88727	0.00647618	0.361335	-0.722549	-4.19518	0.000165235	0.0242458	-1.10155	-5.7023	1.62874e-06	0.000227358
TPBGL	0.894558	2.69174	0.0106395	0.379177	1.37187	4.19391	0.000165861	0.0242458	1.44364	3.93488	0.00035612	0.00447139
AC002511.2	0.833341	2.39933	0.0216173	0.416878	1.43342	4.193	0.000166312	0.0242458	1.07453	2.80243	0.00804966	0.0338731
OTUD4	-0.509108	-2.99056	0.00494939	0.350046	-0.702095	-4.19008	0.000167763	0.0242915	-0.966458	-5.14248	9.24717e-06	0.00047967
JAKMIP2	-0.51468	-2.25393	0.0302592	0.428972	-0.941829	-4.19042	0.000167591	0.0242915	-1.19135	-4.72594	3.32816e-05	0.00100824
BHLHE40	-0.49277	-2.04536	0.048034	0.44684	-0.992608	-4.18589	0.000169865	0.0243483	-1.69186	-6.36119	2.10678e-07	0.000121609
SLC5A3	-0.739847	-2.40996	0.0210831	0.413863	-1.26546	-4.18792	0.000168842	0.0243483	-1.51161	-4.46022	7.4621e-05	0.0016676
NFAT5	-0.432653	-2.69557	0.0105382	0.378578	-0.661423	-4.18672	0.00016945	0.0243483	-0.577512	-3.25926	0.00241121	0.0156309
LINC01018	0.670917	3.39599	0.00165563	0.307213	0.812983	4.18083	0.000172442	0.0244713	0.875833	4.01575	0.000280968	0.00383815
TYMSOS	0.926037	2.80726	0.0079512	0.365913	1.35749	4.18094	0.000172386	0.0244713	1.40239	3.85098	0.000454682	0.0052069
RP11-738B7.1	0.834375	2.37566	0.022851	0.41982	1.44542	4.1812	0.000172252	0.0244713	1.39632	3.60129	0.000930882	0.00832377
ARRDC4	-0.583406	-2.10545	0.0421528	0.443248	-1.13985	-4.17931	0.000173224	0.0244829	-1.72984	-5.65494	1.887e-06	0.000242939
PATL2	-0.443434	-3.51928	0.00117341	0.300832	-0.518072	-4.17734	0.000174243	0.0244829	-0.604486	-4.3457	0.000105357	0.00206154
LHFPL2	-0.598708	-2.79983	0.00810298	0.365913	-0.879453	-4.17844	0.000173675	0.0244829	-0.891318	-3.7757	0.000565295	0.00600512
TTLL4	-0.258565	-2.52063	0.0161922	0.400271	-0.421315	-4.17283	0.000176594	0.0246914	-0.552705	-4.88068	2.07183e-05	0.000752538
PTGS2	-0.474704	-2.13035	0.039908	0.442886	-0.915085	-4.17228	0.000176884	0.0246914	-0.907784	-3.69027	0.000722485	0.00699953
LIMK1	-0.587336	-2.28615	0.0281136	0.425091	-1.05375	-4.16713	0.000179611	0.0247867	-1.73997	-6.13487	4.24822e-07	0.000155096
OCM2	0.531627	2.51666	0.0163481	0.400271	0.866328	4.16661	0.000179887	0.0247867	1.30587	5.59971	2.24036e-06	0.000263975
TM4SF19-AS1	-0.706832	-2.25621	0.0301021	0.428938	-1.28573	-4.16963	0.000178278	0.0247867	-1.93558	-5.59658	2.2622e-06	0.000264512
SLC22A4	-0.261628	-1.33274	0.19083	0.519594	-0.805193	-4.16719	0.000179578	0.0247867	-0.542333	-2.5025	0.0169149	0.054567
GFRA2	0.445016	3.02718	0.00449459	0.343446	0.602213	4.16195	0.000182397	0.0250517	-0.011576	-0.0713294	0.943523	0.95906
BID	-0.40265	-1.75667	0.0873118	0.462974	-0.937805	-4.15679	0.000185211	0.0250684	-1.53371	-6.0611	5.34123e-07	0.000170656
SLC30A1	-0.505607	-2.24081	0.0311736	0.429556	-0.923726	-4.1593	0.000183837	0.0250684	-1.34171	-5.3864	4.34466e-06	0.000335591
MFSD12	-0.755977	-2.76445	0.00886366	0.365913	-1.11856	-4.15568	0.000185824	0.0250684	-1.49531	-4.95311	1.65826e-05	0.000655327
TGM2	-0.764057	-2.13558	0.0394502	0.4425	-1.46347	-4.15583	0.000185739	0.0250684	-1.93663	-4.90326	1.93298e-05	0.000719855
AC074338.5	1.08911	2.98927	0.00496612	0.350046	1.49013	4.15529	0.000186039	0.0250684	1.45855	3.62628	0.00086713	0.00791471
PGAM1P7	-0.50196	-2.41104	0.0210297	0.413666	-0.852558	-4.16047	0.000183197	0.0250684	-0.649658	-2.82662	0.007568	0.0325993
CTTNBP2	0.380255	2.63967	0.0121077	0.386905	0.588377	4.14967	0.000189165	0.0254093	0.681229	4.28366	0.000126889	0.00230838
WDFY4	-0.396759	-2.22692	0.0321692	0.430927	-0.727395	-4.14794	0.000190142	0.0254605	-1.19006	-6.05056	5.51904e-07	0.000170656
ADAM8	-0.322369	-1.75238	0.0880564	0.46344	-0.749686	-4.14036	0.000194463	0.0257451	-1.20926	-5.95445	7.43871e-07	0.000184037
IL7	-0.224468	-1.77634	0.0839633	0.461395	-0.514924	-4.13999	0.000194678	0.0257451	-0.806557	-5.7817	1.27252e-06	0.000206181
STX4	-0.51929	-3.16619	0.00310269	0.328535	-0.668777	-4.14279	0.000193067	0.0257451	-0.961202	-5.30872	5.52792e-06	0.000378537
AP5B1	-0.503927	-2.95704	0.0054033	0.352943	-0.694685	-4.14153	0.000193789	0.0257451	-0.90416	-4.80599	2.60523e-05	0.000877437
RPL7P10	0.997004	3.50102	0.00123516	0.300832	1.15984	4.1379	0.000195888	0.0258064	1.04346	3.3191	0.00204697	0.0140302
HMGB3P24	0.797591	3.12489	0.00346649	0.338062	1.03934	4.13711	0.00019635	0.0258064	0.834288	2.96086	0.00534957	0.0259675
CRPP1	0.714383	3.25003	0.00247259	0.324742	0.894146	4.13284	0.000198849	0.0260548	1.06857	4.40357	8.85271e-05	0.0018455
LTB	-0.431939	-1.72375	0.0931647	0.466134	-1.01799	-4.12742	0.000202067	0.0262351	-2.03459	-7.35488	1.0037e-08	7.14554e-05
ABL2	-0.591817	-2.50211	0.0169307	0.400271	-0.960826	-4.12712	0.000202249	0.0262351	-1.16691	-4.46892	7.26854e-05	0.00163926
ACVR1B	-0.261596	-2.10297	0.0423829	0.443452	-0.505533	-4.12891	0.000201179	0.0262351	-0.550462	-4.00846	0.000287051	0.00389374
MTND4P20	0.591435	2.12568	0.0403206	0.442925	1.13005	4.1264	0.000202683	0.0262351	0.897641	2.92241	0.00591301	0.0277768
VSX1	0.367275	2.01165	0.0516392	0.448873	0.741325	4.12527	0.000203358	0.0262431	0.896211	4.4465	7.77782e-05	0.00171169
IL18	-0.327124	-1.44702	0.156376	0.498535	-0.917439	-4.12308	0.000204684	0.0262555	-1.36121	-5.45424	3.51991e-06	0.000306263
SPINT1	-0.613701	-2.61052	0.013009	0.391063	-0.954061	-4.12316	0.000204635	0.0262555	-1.07246	-4.13237	0.000199124	0.00307394
TRDC	-0.574382	-1.91809	0.0629013	0.455813	-1.21461	-4.12086	0.000206033	0.0263347	-2.43966	-7.37981	9.3083e-09	7.14554e-05
CCL3	-0.77898	-1.44192	0.157799	0.499567	-2.19043	-4.11936	0.00020695	0.0263347	-3.86315	-6.47746	1.47064e-07	0.000109602
TNFRSF9	-0.618055	-1.86726	0.069864	0.456803	-1.34161	-4.11803	0.000207767	0.0263347	-1.88155	-5.14921	9.05685e-06	0.000475847
GTF2IP5	0.78234	3.71155	0.000679777	0.300832	0.854564	4.11897	0.00020719	0.0263347	1.06926	4.59506	4.95927e-05	0.00128619
ZDHHC20P1	0.670275	2.05449	0.0470967	0.44684	1.32193	4.11665	0.00020862	0.0263645	2.38	6.60808	9.82831e-08	0.000109602
NFKBIZ	-0.447327	-2.30787	0.0267451	0.425091	-0.785125	-4.11537	0.000209411	0.0263864	-0.863686	-4.03636	0.000264433	0.00369851
SLC17A9	-0.351823	-2.1279	0.0401237	0.442925	-0.669375	-4.11321	0.000210756	0.0264778	-0.861559	-4.7202	3.38702e-05	0.001021
MSC	-0.84189	-1.87103	0.0693257	0.456803	-1.82117	-4.11206	0.000211471	0.0264897	-2.53475	-5.10281	1.04531e-05	0.000507595
CHMP4B	-0.537493	-3.10169	0.00368828	0.338618	-0.700898	-4.10927	0.000213228	0.0266317	-1.06493	-5.56666	2.48262e-06	0.000274176
NFKBID	-0.432965	-2.96711	0.00526295	0.35047	-0.590001	-4.10788	0.000214105	0.0266352	-0.764408	-4.74519	3.13795e-05	0.00098124
FAAH2	-0.217719	-1.26307	0.214527	0.536418	-0.696683	-4.10627	0.000215127	0.0266352	-0.696458	-3.65992	0.000787915	0.00740339
PALLD	-0.455424	-2.99868	0.00484496	0.348592	-0.61392	-4.10686	0.000214753	0.0266352	-0.608103	-3.62693	0.000865513	0.00790992
POM121L10P	1.17132	3.31087	0.00209374	0.320558	1.4295	4.1052	0.000215807	0.0266422	1.75679	4.49814	6.65382e-05	0.0015542
STXBP2	-0.293909	-2.32055	0.0259743	0.425091	-0.511169	-4.10039	0.000218901	0.0269462	-0.746691	-5.3403	5.01246e-06	0.000365371
ZNF804A	-0.400004	-1.90831	0.0641923	0.455813	-0.845356	-4.09741	0.000220843	0.0271072	-1.0327	-4.46279	7.40446e-05	0.00165769
PKM	-0.557277	-2.39698	0.0217372	0.416969	-0.936524	-4.09257	0.000224025	0.0273432	-1.52939	-5.95881	7.33861e-07	0.000184037
TXNRD1	-0.593014	-2.72849	0.00970417	0.369887	-0.873216	-4.08191	0.000231193	0.0273432	-1.40415	-5.85221	1.02208e-06	0.000186173
FAM129B	-0.815607	-2.30144	0.0271437	0.425091	-1.42605	-4.08825	0.0002269	0.0273432	-2.25306	-5.75889	1.36601e-06	0.000208045
IL1B	-0.951396	-1.81231	0.0781219	0.459234	-2.11346	-4.09024	0.000225573	0.0273432	-3.24919	-5.60652	2.1934e-06	0.000262439
VIM	-0.509245	-2.76696	0.00880742	0.365913	-0.74127	-4.09201	0.000224395	0.0273432	-1.09662	-5.39735	4.19959e-06	0.000330509
HOTTIP	0.552161	3.15953	0.00315881	0.329094	0.702621	4.08471	0.000229287	0.0273432	1.02052	5.28965	5.86442e-06	0.00038837
LAMP3	-0.732853	-2.41095	0.0210339	0.413666	-1.22344	-4.08921	0.000226263	0.0273432	-1.67946	-5.00482	1.41419e-05	0.000606809
KCNK13	-0.41058	-1.96375	0.0571649	0.450765	-0.839905	-4.08133	0.00023159	0.0273432	-1.12378	-4.86873	2.14924e-05	0.000776034
MRPS6	-0.508945	-2.20225	0.0340074	0.434502	-0.92878	-4.08311	0.000230371	0.0273432	-1.12971	-4.42801	8.22394e-05	0.00176703
INHBA	-1.17629	-2.25606	0.0301129	0.428938	-2.09464	-4.08159	0.000231411	0.0273432	-2.4159	-4.19723	0.000164232	0.00271485
PRKAG2	-0.339354	-2.88346	0.00654032	0.361878	-0.473251	-4.08541	0.000228816	0.0273432	-0.529881	-4.07837	0.000233624	0.00340589
RP1-124C6.1	0.514763	1.8461	0.0729515	0.457972	1.12091	4.08416	0.000229661	0.0273432	1.22006	3.96347	0.000327551	0.00423971
RP11-162A12.3	0.307908	2.36049	0.0236749	0.421277	0.524085	4.08195	0.000231167	0.0273432	0.513753	3.56766	0.00102385	0.00885116
PTRF	-0.515459	-2.09442	0.043183	0.443591	-0.988617	-4.08113	0.000231727	0.0273432	-0.906782	-3.33748	0.00194607	0.0135694
MITF	-0.659826	-3.20052	0.00282818	0.328535	-0.827797	-4.07942	0.000232899	0.0274058	-1.12992	-4.96462	1.60055e-05	0.00064437
CTD-2020K17.1	-0.460743	-2.42384	0.0204034	0.412325	-0.762909	-4.07758	0.000234169	0.0274794	-0.77262	-3.6818	0.000740204	0.00710795
DUSP6	-0.738345	-1.96952	0.0564726	0.450643	-1.50175	-4.0699	0.000239537	0.0278198	-2.66597	-6.44175	1.64217e-07	0.000109602
NLRC5	-0.36659	-1.97391	0.0559513	0.450118	-0.744236	-4.07137	0.000238499	0.0278198	-1.12069	-5.46615	3.39213e-06	0.000302351
ANPEP	-0.620988	-2.56155	0.0146638	0.396258	-0.970872	-4.06879	0.000240326	0.0278198	-1.24061	-4.63558	4.38415e-05	0.00120154
MORN5	0.602779	2.86689	0.00682548	0.363934	0.842074	4.06899	0.00024018	0.0278198	0.761262	3.27971	0.00228029	0.0150575
RP11-40C6.2	-0.554096	-1.83533	0.074566	0.458876	-1.20955	-4.07039	0.00023919	0.0278198	-0.856002	-2.56834	0.0144233	0.0492047
RAPGEF1	-0.381357	-1.90488	0.0646513	0.455813	-0.801105	-4.06544	0.000242711	0.0278964	-1.22275	-5.53246	2.76086e-06	0.00028213
MIR22HG	-0.356654	-2.0517	0.0473818	0.44684	-0.695436	-4.0645	0.000243385	0.0278964	-0.768314	-4.00362	0.000291161	0.0039299
RP11-54F2.9	0.493417	2.28532	0.0281666	0.425091	0.863958	4.06546	0.000242698	0.0278964	0.89707	3.76363	0.0005853	0.00612022
KCNJ5	0.73092	2.66328	0.0114201	0.384645	1.09785	4.0642	0.000243599	0.0278964	0.767363	2.53277	0.015724	0.0520412
GLRX	-0.378993	-2.39037	0.022077	0.417261	-0.633867	-4.06178	0.000245347	0.0279466	-0.923412	-5.27567	6.12393e-06	0.000394631
STK11IP	-0.229207	-2.32363	0.0257898	0.425091	-0.394416	-4.06236	0.000244929	0.0279466	-0.453573	-4.16518	0.00018065	0.00288466
SLC43A2	-0.456353	-2.79421	0.00821957	0.365913	-0.652767	-4.06069	0.000246136	0.0279619	-1.00048	-5.54899	2.62272e-06	0.000277359
CTB-178M22.2	0.730359	3.13446	0.00337879	0.33564	0.930673	4.05795	0.000248131	0.0281139	1.07245	4.16918	0.00017852	0.00286466
ALAS1	-0.684184	-1.99223	0.0538206	0.449602	-1.36985	-4.05249	0.000252164	0.0282666	-2.28196	-6.01896	6.08806e-07	0.00017932
TRANK1	-0.46779	-2.44512	0.0194001	0.410032	-0.76343	-4.05418	0.000250906	0.0282666	-1.0959	-5.18882	8.01287e-06	0.000446827
FCGBP	-0.396083	-1.94107	0.0599549	0.454752	-0.813575	-4.05076	0.00025345	0.0282666	-1.13442	-5.03591	1.28498e-05	0.000575599
CENPIP1	0.954906	3.46767	0.00135608	0.301693	1.09804	4.05117	0.000253142	0.0282666	1.02384	3.3679	0.00178948	0.0128186
RP11-372M18.2	0.509384	2.50653	0.0167518	0.400271	0.810305	4.05098	0.000253289	0.0282666	0.698353	3.11279	0.00358055	0.020148
RP4-569D19.5	0.547928	2.37845	0.0227023	0.419403	0.919207	4.05386	0.000251145	0.0282666	0.593745	2.33464	0.0251412	0.0705915
LASP1	-0.365462	-2.3623	0.0235753	0.421277	-0.615605	-4.04277	0.000259485	0.0282879	-1.11523	-6.52988	1.25089e-07	0.000109602
HAPLN3	-0.466228	-1.87618	0.0685969	0.456803	-0.98732	-4.03661	0.000264237	0.0282879	-1.81277	-6.60792	9.83321e-08	0.000109602
PRR5L	-0.342778	-2.65272	0.0117231	0.385767	-0.51386	-4.04023	0.000261433	0.0282879	-0.898364	-6.29764	2.56486e-07	0.000128892
MBOAT7	-0.263607	-2.07012	0.0455288	0.44458	-0.506364	-4.04004	0.000261585	0.0282879	-0.835523	-5.94353	7.69541e-07	0.000184321
ATP13A3	-0.629213	-2.36164	0.0236117	0.421277	-1.06083	-4.04524	0.000257606	0.0282879	-1.60053	-5.44162	3.66058e-06	0.000312388
ATP2C1	-0.406796	-2.04686	0.0478789	0.44684	-0.789711	-4.03705	0.000263895	0.0282879	-1.1443	-5.21556	7.37669e-06	0.00042523
SLC39A8	-0.457253	-1.47616	0.148425	0.493127	-1.23388	-4.047	0.000256278	0.0282879	-1.68653	-4.93195	1.7698e-05	0.00067861
NFE2L3	-0.390731	-1.76665	0.0855986	0.461951	-0.880602	-4.04517	0.000257659	0.0282879	-1.06877	-4.37729	9.58135e-05	0.00194193
MRPL4	-0.212249	-1.60062	0.11803	0.478922	-0.526964	-4.03746	0.000263575	0.0282879	-0.609699	-4.16493	0.000180787	0.00288577
STARD13	0.442997	2.73432	0.00956315	0.369421	0.644103	4.03913	0.000262289	0.0282879	0.660041	3.69035	0.00072233	0.00699953
CTA-331P3.1	0.542414	2.66192	0.0114587	0.385097	0.809878	4.03801	0.000263149	0.0282879	0.8258	3.67102	0.000763351	0.00724107
RP11-182J1.18	0.592579	3.68494	0.000733593	0.300832	0.639758	4.04188	0.000260171	0.0282879	0.625295	3.52222	0.00116377	0.00964125
CTHRC1P1	-0.873838	-2.80212	0.00805588	0.365913	-1.24189	-4.04597	0.000257055	0.0282879	-1.20173	-3.49069	0.00127148	0.0102166
PSD3	-0.616174	-2.36511	0.0234214	0.421277	-1.03647	-4.04193	0.000260128	0.0282879	-0.991616	-3.44778	0.00143356	0.0110631
CSN1S2AP	0.932764	2.85262	0.00708041	0.365913	1.30238	4.04665	0.00025654	0.0282879	0.819393	2.26993	0.0291758	0.0778707
ZMIZ1-AS1	-0.526229	-3.03697	0.00437986	0.342022	-0.689985	-4.04566	0.000257288	0.0282879	-0.405327	-2.11894	0.0409229	0.0982198
CSF2RB	-0.452821	-1.55912	0.127545	0.482786	-1.15176	-4.02902	0.000270206	0.0284011	-2.46177	-7.678	3.79629e-09	5.16003e-05
CKAP4	-0.465596	-3.26918	0.00234678	0.321291	-0.564349	-4.02589	0.000272711	0.0284011	-1.06217	-6.75576	6.23921e-08	0.000109602
EFHD2	-0.405427	-2.13128	0.0398265	0.442603	-0.754122	-4.02766	0.000271297	0.0284011	-1.42402	-6.78096	5.77438e-08	0.000109602
LAT2	-0.492302	-2.36097	0.0236487	0.421277	-0.827702	-4.03289	0.000267151	0.0284011	-1.45759	-6.332	2.306e-07	0.000126135
TWF2	-0.440693	-2.39108	0.0220401	0.416969	-0.729309	-4.02026	0.000277262	0.0284011	-1.19418	-5.86915	9.69646e-07	0.000186173
FSCN1	-0.478537	-1.16702	0.250724	0.56121	-1.62823	-4.03426	0.000266073	0.0284011	-2.61646	-5.77998	1.27932e-06	0.000206181
JUNB	-0.497179	-2.50862	0.0166675	0.400271	-0.786484	-4.03177	0.000268031	0.0284011	-1.24045	-5.66954	1.80329e-06	0.000237619
CD300LB	-0.697495	-1.93471	0.0607588	0.454818	-1.42659	-4.0203	0.000277234	0.0284011	-2.17714	-5.47027	3.34907e-06	0.000300123
VNN1	0.734554	3.20484	0.0027953	0.328535	0.908528	4.02722	0.000271648	0.0284011	1.35268	5.34596	4.92531e-06	0.000360866
HAVCR1	0.521177	2.33505	0.0251175	0.425091	0.883339	4.02088	0.000276759	0.0284011	1.27236	5.1638	8.65758e-06	0.000464887
LRRK2	-0.561317	-2.37449	0.0229137	0.419875	-0.93551	-4.02063	0.000276959	0.0284011	-1.32394	-5.07315	1.14551e-05	0.000537107
TMEM220-AS1	0.264389	1.97021	0.0563912	0.450643	0.53156	4.02443	0.000273881	0.0284011	0.627161	4.23345	0.000147426	0.00253106
EMP1	-0.862371	-2.93349	0.00574518	0.355211	-1.16408	-4.02306	0.000274986	0.0284011	-1.32883	-4.09457	0.000222704	0.00330535
C17orf49	-0.512628	-2.43589	0.01983	0.411189	-0.833041	-4.02166	0.000276127	0.0284011	-0.88256	-3.7988	0.000528834	0.005765
RALA	-0.501537	-3.07312	0.00397975	0.342022	-0.645951	-4.02124	0.000276467	0.0284011	-0.683954	-3.79622	0.000532792	0.00578694
TRIP4	-0.285574	-2.04742	0.0478217	0.44684	-0.552239	-4.02252	0.000275427	0.0284011	-0.533979	-3.46784	0.00135546	0.0106361
RP11-73B2.6	0.683035	2.66939	0.0112481	0.382487	1.01477	4.02921	0.000270059	0.0284011	0.958245	3.3923	0.00167264	0.0122571
DEPTOR	0.342525	1.78014	0.0833293	0.460731	0.762689	4.02712	0.000271727	0.0284011	0.697525	3.28375	0.0022552	0.0149373
TFE3	-0.325949	-2.14299	0.0388093	0.440514	-0.601253	-4.01616	0.000280622	0.0284161	-1.09167	-6.50146	1.36557e-07	0.000109602
RAB30	-0.280672	-2.20159	0.034058	0.434502	-0.503937	-4.01603	0.000280735	0.0284161	-0.788519	-5.60269	2.21969e-06	0.000263372
KDM2A	-0.347916	-2.34516	0.0245352	0.424845	-0.586498	-4.0165	0.000280345	0.0284161	-0.856872	-5.23192	7.01236e-06	0.000415441
RRP12	-0.208177	-1.45282	0.154767	0.497543	-0.566788	-4.01866	0.000278568	0.0284161	-0.751995	-4.75378	3.0566e-05	0.000962143
NRIP3	-0.747469	-1.94604	0.059334	0.454017	-1.51903	-4.01797	0.000279136	0.0284161	-2.00277	-4.72319	3.35616e-05	0.00101457
FBP1	-0.730853	-1.70762	0.0961502	0.467262	-1.6904	-4.01268	0.000283509	0.0284943	-2.73321	-5.78472	1.26063e-06	0.000206181
RP11-368J21.3	0.581326	2.6137	0.012908	0.391063	0.878562	4.01321	0.00028307	0.0284943	0.833031	3.39269	0.00167081	0.0122489
CD109	-0.629875	-2.92904	0.00581208	0.356699	-0.849467	-4.0133	0.000282998	0.0284943	-0.692404	-2.91661	0.00600278	0.0280287
SRC	-0.524178	-1.52348	0.136204	0.487675	-1.35808	-4.01023	0.000285562	0.0286333	-2.17687	-5.73111	1.48918e-06	0.000220891
TREML2	-0.367621	-2.08704	0.043884	0.44439	-0.695098	-4.00921	0.000286415	0.0286516	-0.891678	-4.58549	5.10562e-05	0.00130826
MMP14	-0.603	-1.70575	0.0965012	0.467809	-1.39293	-4.00324	0.000291486	0.02894	-2.43063	-6.22823	3.18031e-07	0.000141507
GPR84	-0.327999	-1.01722	0.315705	0.609352	-1.27035	-4.00266	0.000291982	0.02894	-1.93118	-5.42515	3.85256e-06	0.000319538
CIR1	-0.474263	-2.83121	0.00747964	0.365913	-0.659945	-4.00263	0.000292008	0.02894	-0.951194	-5.14364	9.21434e-06	0.00047951
GPBAR1	0.299705	2.01505	0.0512644	0.448873	0.586258	4.00466	0.000290274	0.02894	0.49054	2.98755	0.00498866	0.0247754
NCF2	-0.695515	-2.44845	0.0192476	0.410032	-1.11786	-3.99812	0.0002959	0.0289894	-1.84304	-5.87715	9.4583e-07	0.000186173
USP30-AS1	-0.482722	-2.37634	0.0228149	0.419579	-0.799449	-3.9984	0.000295656	0.0289894	-1.2701	-5.66367	1.83647e-06	0.000239892
PFDN1	-0.352438	-2.08937	0.0436609	0.444359	-0.663948	-3.999	0.000295141	0.0289894	-0.982539	-5.27631	6.11178e-06	0.000394631
ILK	-0.403851	-2.43269	0.0199807	0.411189	-0.6533	-3.99817	0.000295856	0.0289894	-0.913651	-4.98532	1.50176e-05	0.000627116
ZC3H7A	-0.358675	-2.33696	0.0250063	0.425091	-0.60434	-4.00051	0.000293828	0.0289894	-0.660079	-3.89578	0.000399148	0.00479325
CCL4L2	-0.559177	-1.48887	0.145062	0.491685	-1.47762	-3.99717	0.000296731	0.0290043	-2.26513	-5.4632	3.42337e-06	0.00030289
PRKCD	-0.327576	-1.81679	0.0774184	0.458986	-0.708964	-3.99486	0.000298746	0.0290551	-0.897071	-4.5068	6.48168e-05	0.00152813
INPP1	-0.284534	-1.7139	0.0949783	0.467236	-0.652552	-3.99347	0.000299972	0.0290551	-0.791614	-4.31929	0.000114044	0.00216122
AC142528.1	0.6666	3.29474	0.00218839	0.320558	0.795342	3.99387	0.000299616	0.0290551	0.760961	3.40695	0.00160602	0.0119375
IL1A	-0.608352	-1.8468	0.0728471	0.457972	-1.29518	-3.99467	0.000298918	0.0290551	-1.20585	-3.31592	0.00206492	0.0141215
RHOQ	-0.449439	-2.29721	0.0274092	0.425091	-0.76879	-3.99228	0.000301021	0.0290908	-1.14375	-5.29551	5.75883e-06	0.000383827
MRAS	-0.512967	-1.91632	0.0631336	0.455813	-1.05134	-3.9903	0.000302774	0.0291941	-1.73162	-5.85975	9.98397e-07	0.000186173
SLC2A3	-0.558213	-2.35422	0.0240237	0.423438	-0.930562	-3.98727	0.000305478	0.0292935	-1.58307	-6.04776	5.56721e-07	0.000170656
RP11-314N2.2	0.720848	2.86646	0.00683308	0.363934	0.986831	3.98684	0.000305862	0.0292935	1.13344	4.08269	0.000230657	0.00337641
GGT1	-0.276387	-1.48224	0.146808	0.49186	-0.731833	-3.98746	0.000305302	0.0292935	-0.730791	-3.55011	0.00107585	0.00912689
TUBB6	-0.427401	-1.42591	0.16234	0.501841	-1.17524	-3.98354	0.000308838	0.0293465	-1.8893	-5.70961	1.59214e-06	0.000224449
ALPK1	-0.382347	-2.11252	0.0415043	0.443248	-0.709413	-3.98223	0.000310024	0.0293465	-1.13849	-5.69795	1.65086e-06	0.000228209
FABP5	-0.596474	-2.17773	0.0359265	0.436098	-1.07333	-3.98132	0.000310855	0.0293465	-1.67897	-5.55266	2.59297e-06	0.000277359
GABARAPL1	-0.520167	-3.07083	0.00400406	0.342022	-0.663721	-3.98091	0.000311225	0.0293465	-0.78903	-4.21944	0.000153718	0.00260558
IGLV3-13	-1.32521	-3.53332	0.00112799	0.300832	-1.47078	-3.98411	0.000308324	0.0293465	-1.74533	-4.21526	0.000155645	0.00262351
RP11-394A14.4	1.42776	4.39768	9.01107e-05	0.208002	1.27352	3.98528	0.000307264	0.0293465	1.37737	3.84295	0.000465391	0.00529304
RP11-1008C21.2	-0.161578	-1.06036	0.295904	0.594123	-0.597195	-3.98175	0.000310464	0.0293465	-0.10499	-0.624123	0.536406	0.630852
SPATA6L	0.27695	1.61837	0.114142	0.477278	0.670167	3.97871	0.000313245	0.029472	0.901543	4.7721	2.89005e-05	0.000930284
SIGLEC10	-0.389559	-1.38185	0.175368	0.509052	-1.10349	-3.97686	0.000314942	0.0295665	-1.41783	-4.55575	5.588e-05	0.00138694
SPIN4	-0.331296	-1.88007	0.06805	0.456803	-0.688784	-3.97123	0.000320187	0.029993	-0.718343	-3.69264	0.000717599	0.00697593
FMNL1	-0.3868	-2.48849	0.0174933	0.403036	-0.607236	-3.96908	0.000322205	0.030116	-0.789536	-4.60117	4.86791e-05	0.00127332
FADS1	-0.454214	-1.94415	0.0595691	0.454428	-0.912144	-3.96659	0.00032457	0.0302521	-1.43559	-5.56608	2.4871e-06	0.000274176
SIX3	0.678999	3.20156	0.00282019	0.328535	0.827908	3.96605	0.000325078	0.0302521	0.699434	2.98736	0.00499116	0.0247762
LRP12	-0.48933	-2.08517	0.0440627	0.44439	-0.915879	-3.96518	0.000325915	0.0302641	-1.30636	-5.04254	1.25895e-05	0.000567257
RP13-565O16.2	0.792907	3.16297	0.00312972	0.328535	0.97797	3.96353	0.000327493	0.0303446	0.948741	3.42821	0.00151386	0.0114857
CAMSAP2	-0.555554	-2.85396	0.00705623	0.365913	-0.758414	-3.95832	0.000332521	0.0307114	-0.894305	-4.16154	0.000182616	0.00290196
VN1R13P	1.22999	3.75396	0.000601818	0.300832	1.27643	3.95794	0.00033289	0.0307114	1.15283	3.18716	0.00293214	0.0177277
RP11-168P8.3	0.97357	3.28753	0.002232	0.320558	1.15343	3.9571	0.000333713	0.030721	1.1497	3.51669	0.00118201	0.00972221
NFKB2	-0.396243	-1.42244	0.163338	0.502499	-1.08406	-3.95378	0.000336974	0.0307457	-2.03522	-6.61806	9.5306e-08	0.000109602
SLFN13	-0.257197	-2.11646	0.0411467	0.443248	-0.472907	-3.95371	0.000337042	0.0307457	-0.736459	-5.48961	3.15385e-06	0.0002935
IER5	-0.509486	-2.37857	0.0226963	0.419403	-0.832699	-3.94962	0.000341101	0.0307457	-1.24013	-5.24442	6.74626e-06	0.000409191
GRIPAP1	-0.376478	-2.29877	0.0273108	0.425091	-0.637213	-3.95299	0.000337755	0.0307457	-0.907597	-5.01992	1.34988e-05	0.000591756
FAM20C	-0.518517	-2.52826	0.0158967	0.400229	-0.797827	-3.95231	0.000338424	0.0307457	-1.08764	-4.80387	2.62214e-05	0.000880539
VPS37C	-0.298328	-1.8111	0.0783124	0.459234	-0.64052	-3.95061	0.000340108	0.0307457	-0.866137	-4.76302	2.97147e-05	0.00094418
PPARGC1B	-0.401773	-2.51263	0.0165075	0.400271	-0.62138	-3.9481	0.000342619	0.0307457	-0.838706	-4.75121	3.08076e-05	0.000968319
RHBDD2	-0.54339	-2.97585	0.0051439	0.35047	-0.710439	-3.95285	0.000337891	0.0307457	-0.875186	-4.34158	0.000106667	0.00207765
CDO1	0.346635	1.63118	0.111401	0.476564	0.825834	3.94827	0.000342453	0.0307457	1.00545	4.28585	0.00012606	0.00229819
LUCAT1	-0.372213	-1.57326	0.124236	0.481312	-0.919501	-3.94862	0.000342096	0.0307457	-0.978808	-3.74761	0.000612914	0.00630403
GATA4	0.476219	2.3469	0.0244357	0.424833	0.788624	3.94859	0.000342127	0.0307457	0.749026	3.34374	0.00191281	0.0134186
FUNDC2P2	0.870219	2.99037	0.00495189	0.350046	1.13224	3.95292	0.000337825	0.0307457	1.0023	3.11991	0.00351299	0.0198982
RGS16	-0.642943	-2.1796	0.0357766	0.435767	-1.14542	-3.94505	0.000345685	0.0307857	-1.36322	-4.18619	0.000169716	0.0027689
INPP5F	-0.394495	-2.68962	0.0106959	0.379177	-0.569671	-3.946	0.000344732	0.0307857	-0.669863	-4.13697	0.000196429	0.00304334
TACSTD2	-0.472048	-1.47719	0.148152	0.493031	-1.24077	-3.94479	0.000345947	0.0307857	-1.36384	-3.86599	0.000435289	0.00506094
RP4-590F24.2	0.302261	1.49845	0.142565	0.490747	0.783498	3.94621	0.000344514	0.0307857	0.828871	3.72215	0.000659429	0.00661281
DENND5A	-0.432392	-2.72274	0.00984537	0.371835	-0.616451	-3.94376	0.00034699	0.0308143	-0.803926	-4.58556	5.10446e-05	0.00130826
TCL1A	-0.572958	-2.55154	0.0150247	0.398791	-0.871043	-3.94097	0.000349834	0.0308828	-1.50208	-6.05928	5.3716e-07	0.000170656
EIF1B	-0.343942	-2.16039	0.0373407	0.438888	-0.617643	-3.94156	0.000349237	0.0308828	-0.861693	-4.90283	1.93554e-05	0.00072018
USP12	-0.504152	-2.33728	0.0249877	0.425091	-0.836681	-3.94088	0.00034993	0.0308828	-1.12405	-4.72046	3.3843e-05	0.001021
CTD-2200A16.1	1.22299	3.78454	0.000551059	0.300832	1.25305	3.93953	0.000351312	0.0309408	1.32104	3.703	0.000696644	0.00684073
BIRC3	-0.518196	-2.14756	0.0384183	0.440514	-0.934925	-3.93652	0.000354416	0.03115	-1.1635	-4.36784	9.85762e-05	0.00198181
HNRNPA1P65	1.26849	3.51168	0.00119876	0.300832	1.39824	3.93274	0.000358352	0.0314312	1.46764	3.68042	0.000743125	0.00712836
CTD-3028N15.1	0.834248	2.57722	0.0141143	0.394734	1.25253	3.93122	0.000359946	0.0315064	1.1407	3.19209	0.00289334	0.0175852
ARHGEF2	-0.369035	-2.51765	0.0163087	0.400271	-0.56663	-3.92746	0.00036392	0.0315952	-0.950355	-5.87303	9.58023e-07	0.000186173
FGFBP1	0.750489	3.26967	0.00234366	0.321291	0.887675	3.92914	0.000362141	0.0315952	1.30334	5.14356	9.21639e-06	0.00047951
SLC25A28	-0.481832	-3.52992	0.00113883	0.300832	-0.527805	-3.9285	0.000362819	0.0315952	-0.607748	-4.03311	0.000266974	0.00372308
RP11-21B23.2	0.898163	3.07105	0.00400176	0.342022	1.13062	3.92765	0.000363724	0.0315952	0.936314	2.90002	0.0062664	0.0287952
NFKB1	-0.343901	-1.63942	0.109666	0.476197	-0.810285	-3.92445	0.000367135	0.0316238	-1.39278	-6.01432	6.1763e-07	0.00017947
FDPS	-0.295726	-1.85851	0.0711269	0.457304	-0.61486	-3.92586	0.000365625	0.0316238	-0.932939	-5.31099	5.48919e-06	0.000376963
GP6	0.524379	3.66977	0.000766076	0.300832	0.551867	3.92384	0.000367785	0.0316238	0.757844	4.8042	2.61955e-05	0.000880363
OAZ3	0.343478	2.34368	0.0246196	0.424845	0.565994	3.92369	0.000367951	0.0316238	0.655966	4.05441	0.000250735	0.00357362
KANK2	0.344429	1.99308	0.0537229	0.449602	0.667482	3.92418	0.000367425	0.0316238	0.728895	3.82066	0.000496447	0.00551963
RP11-666A8.8	0.216178	1.11545	0.271905	0.575784	0.748223	3.9224	0.000369336	0.0316791	0.595098	2.78146	0.00848989	0.0350416
LINC01547	-0.757929	-3.27792	0.00229146	0.321291	-0.892194	-3.92024	0.00037167	0.0318154	-1.11531	-4.36932	9.81392e-05	0.00197643
S1PR2	-0.512339	-1.76438	0.0859854	0.462239	-1.11979	-3.91792	0.000374203	0.0319044	-2.10429	-6.56431	1.12484e-07	0.000109602
ASPH	-0.480511	-3.34662	0.00189768	0.320558	-0.553785	-3.91857	0.000373485	0.0319044	-0.672635	-4.24356	0.000143045	0.00248079
GSTO1	-0.465017	-2.2509	0.0304679	0.429554	-0.7962	-3.91556	0.000376784	0.0319342	-1.35655	-5.948	7.58931e-07	0.000184192
RPS6KA1	-0.443249	-2.22347	0.0324206	0.430927	-0.768023	-3.91419	0.000378291	0.0319342	-1.23507	-5.61208	2.15587e-06	0.000259403
EML4	-0.442059	-2.27583	0.0287853	0.425116	-0.748564	-3.91536	0.000377002	0.0319342	-1.10657	-5.16044	8.74797e-06	0.000465922
ADAM28	-0.389245	-1.944	0.0595885	0.454428	-0.771586	-3.91508	0.000377315	0.0319342	-1.0878	-4.92118	1.82938e-05	0.000695965
2020-03-03	-0.465079	-2.7821	0.00847624	0.365913	-0.644086	-3.91447	0.000377982	0.0319342	-0.86985	-4.71344	3.45765e-05	0.00102994
NIPA2P1	1.23677	3.06577	0.0040582	0.342022	1.55391	3.91345	0.000379112	0.0319404	1.51437	3.4004	0.00163548	0.0120926
AC115617.2	1.21758	3.40059	0.00163463	0.307213	1.37887	3.91259	0.000380062	0.0319574	1.22239	3.09254	0.00377939	0.0207769
ANXA1	-0.600644	-2.64481	0.0119549	0.38686	-0.87398	-3.90987	0.000383089	0.0321486	-1.3616	-5.43094	3.78385e-06	0.00031445
ARHGEF4	0.407557	3.0199	0.00458181	0.345781	0.51917	3.90838	0.000384753	0.0321619	0.65648	4.40629	8.78044e-05	0.00183671
PGM5P4-AS1	0.465638	2.23339	0.0317018	0.430927	0.802129	3.90882	0.000384268	0.0321619	0.603459	2.62188	0.0126508	0.0452616
SERTAD1	-0.618836	-2.74932	0.0092086	0.368268	-0.86566	-3.90734	0.000385926	0.0321969	-1.4686	-5.91018	8.53564e-07	0.000186173
RP11-465L10.10	-0.571408	-1.74968	0.0885284	0.46344	-1.25548	-3.90576	0.000387708	0.0322826	-1.17765	-3.26645	0.00236434	0.0154211
RP11-90P13.1	0.550543	3.45255	0.0014146	0.307213	0.612881	3.90489	0.000388696	0.0323018	0.694415	3.94471	0.000346034	0.0043834
ARHGAP31	-0.434218	-1.74223	0.0898404	0.464262	-0.957751	-3.9042	0.000389473	0.0323035	-1.63117	-5.92848	8.06394e-07	0.000186173
LYPD3	0.296789	2.12344	0.04052	0.442925	0.53681	3.90209	0.000391878	0.0324401	0.494496	3.20482	0.00279548	0.0172059
CD163	0.684387	2.27442	0.0288783	0.425116	1.15476	3.89892	0.000395517	0.032552	1.6119	4.85239	2.25977e-05	0.000800318
CCND1	-0.52394	-1.62369	0.112998	0.477215	-1.23845	-3.89925	0.000395134	0.032552	-1.65021	-4.63242	4.42656e-05	0.0012058
CLN8	-0.509393	-2.92161	0.00592539	0.357259	-0.669173	-3.89934	0.000395034	0.032552	-0.742207	-3.85604	0.00044805	0.00515445
LPXN	-0.369264	-2.05389	0.0471579	0.44684	-0.689661	-3.89727	0.000397423	0.032646	-1.03937	-5.2367	6.90939e-06	0.000411624
SIRPA	-0.425914	-2.18505	0.0353434	0.43571	-0.747482	-3.89605	0.000398834	0.0326525	-1.28324	-5.9634	7.23473e-07	0.000184037
SPSB1	-0.556895	-2.60047	0.0133341	0.391994	-0.821191	-3.89588	0.00039903	0.0326525	-0.918348	-3.88448	0.000412498	0.00488072
PTGDR2	0.624486	3.90611	0.000387315	0.280409	0.612823	3.8944	0.000400758	0.0327311	0.177221	1.00412	0.321894	0.42969
HIRA	-0.413327	-2.66794	0.0112887	0.382765	-0.593737	-3.89369	0.00040159	0.0327364	-0.757702	-4.43026	8.16844e-05	0.00176335
CORO1C	-0.478959	-2.69429	0.0105719	0.378842	-0.680928	-3.89163	0.000404008	0.0327461	-0.949881	-4.8402	2.34587e-05	0.00082269
RP11-254F19.2	0.536577	2.07882	0.044677	0.44458	0.988706	3.89166	0.000403971	0.0327461	1.01438	3.55983	0.00104673	0.00897413
CTC-218B8.3	0.913856	3.20906	0.00276355	0.328535	1.09082	3.89169	0.000403928	0.0327461	0.893299	2.84148	0.00728567	0.0318011
RP11-9G1.3	0.593034	2.79124	0.00828197	0.365913	0.813533	3.89023	0.000405647	0.0328167	0.587498	2.50479	0.0168219	0.0543901
ST3GAL4	-0.373833	-2.97469	0.00515965	0.35047	-0.480904	-3.88782	0.000408507	0.0329856	-0.727821	-5.24609	6.71137e-06	0.000408953
C4orf47	0.713218	2.59499	0.0135144	0.392704	1.05136	3.88642	0.000410173	0.0330577	0.739921	2.43863	0.0197014	0.060335
XCL1	-0.510126	-2.11608	0.0411816	0.443248	-0.921713	-3.88449	0.000412492	0.0331819	-1.36769	-5.13914	9.34312e-06	0.000482201
IFNA17	1.40877	3.7332	0.000638835	0.300832	1.44256	3.88381	0.000413303	0.0331847	1.48887	3.57392	0.00100589	0.00874437
FAM187B2P	0.867339	3.42773	0.0015159	0.307213	0.966806	3.88187	0.000415645	0.0333101	0.951777	3.40722	0.0016048	0.0119361
HCCS	-0.31468	-1.85874	0.0710933	0.457304	-0.646388	-3.87906	0.000419051	0.0333637	-1.03321	-5.52823	2.79737e-06	0.000282243
DCUN1D3	-0.381648	-1.66718	0.103988	0.473545	-0.874105	-3.87941	0.000418624	0.0333637	-1.33126	-5.2678	6.27504e-06	0.00039572
REL	-0.410259	-2.43062	0.0200791	0.411189	-0.644391	-3.87875	0.000419438	0.0333637	-0.922431	-4.95039	1.67223e-05	0.000656519
SMG9	-0.202532	-1.83992	0.0738751	0.458542	-0.420309	-3.87933	0.000418725	0.0333637	-0.557863	-4.59071	5.02526e-05	0.00129664
IL2RB	-0.252039	-1.50553	0.140742	0.489979	-0.638959	-3.87774	0.000420674	0.0333834	-1.09024	-5.89919	8.83223e-07	0.000186173
METTL1	-0.346782	-1.47071	0.149889	0.494521	-0.899855	-3.87727	0.000421249	0.0333834	-1.31385	-5.04733	1.24052e-05	0.000561628
CASS4	-0.632263	-2.58042	0.0140043	0.394734	-0.93484	-3.87627	0.000422468	0.033418	-0.72331	-2.67402	0.0111194	0.0415913
CTC-436K13.4	1.17757	3.00166	0.00480718	0.348573	1.49558	3.87319	0.000426272	0.0335955	1.61474	3.72842	0.000647674	0.00652948
RP4-639J15.3	0.534052	2.60677	0.0131294	0.391063	0.781024	3.87318	0.000426285	0.0335955	0.830497	3.67202	0.000761165	0.00723157
GPR34	0.650372	1.72937	0.0921429	0.465633	1.43336	3.87225	0.000427432	0.0336239	1.61611	3.89263	0.000402826	0.00481172
PEA15	-0.442104	-1.37332	0.177981	0.511357	-1.22424	-3.86363	0.000438278	0.03374	-2.27383	-6.39813	1.87926e-07	0.000114675
KLF10	-0.503846	-2.94741	0.00554075	0.354301	-0.650596	-3.86668	0.000434417	0.03374	-1.19933	-6.35519	2.14625e-07	0.000122236
PIK3AP1	-0.443228	-1.91563	0.0632245	0.455813	-0.879805	-3.86326	0.000438746	0.03374	-1.57664	-6.17253	3.77977e-07	0.00014959
CHST2	-0.28717	-1.46579	0.151218	0.495913	-0.744906	-3.86293	0.000439177	0.03374	-1.23694	-5.71912	1.54577e-06	0.000222315
CTA-212A2.1	-0.311616	-1.71629	0.0945353	0.467236	-0.690962	-3.86642	0.000434744	0.03374	-1.05685	-5.27269	6.1807e-06	0.000394631
NRDC	-0.377041	-2.32407	0.0257636	0.425091	-0.617505	-3.86709	0.00043389	0.03374	-0.929153	-5.18795	8.03455e-06	0.000447452
F3	-1.04209	-2.01142	0.0516644	0.448873	-1.97291	-3.86891	0.000431608	0.03374	-2.86792	-5.01432	1.37341e-05	0.00059687
ACTN1	-0.533654	-3.23943	0.00254494	0.325008	-0.627216	-3.8682	0.000432495	0.03374	-0.846522	-4.65473	4.1358e-05	0.00115385
MAP4K3	-0.577694	-3.53367	0.00112687	0.300832	-0.621782	-3.86411	0.000437666	0.03374	-0.730768	-4.04907	0.000254717	0.0036099
CD300E	-0.65479	-1.86155	0.0706856	0.457003	-1.33871	-3.86672	0.000434357	0.03374	-1.56862	-4.03959	0.000261929	0.00367372
OR51E2	0.482708	2.3445	0.0245725	0.424845	0.783078	3.86416	0.000437611	0.03374	0.874314	3.84663	0.000460449	0.00525529
WNT9A	0.472418	2.5882	0.0137407	0.394206	0.694035	3.86311	0.000438942	0.03374	0.708762	3.51739	0.00117968	0.00971471
RPL34-AS1	0.130301	0.97523	0.335827	0.622746	0.508916	3.8698	0.000430496	0.03374	0.479131	3.24833	0.00248406	0.0159128
STON2	0.749455	4.46702	7.31043e-05	0.204752	0.637792	3.8622	0.000440099	0.0337502	0.184914	0.998368	0.324635	0.432273
ELF4	-0.432907	-2.49972	0.0170279	0.400271	-0.657906	-3.85963	0.000443404	0.0338422	-1.00887	-5.27694	6.09995e-06	0.000394631
ATXN2L	-0.238783	-1.71283	0.0951769	0.467236	-0.52949	-3.8588	0.000444469	0.0338422	-0.547395	-3.5568	0.00105574	0.00902637
RP11-283G6.4	-1.03229	-2.91083	0.00609332	0.357259	-1.34714	-3.85934	0.000443775	0.0338422	-0.927806	-2.36986	0.0231631	0.0669666
CTD-2503O16.3	0.914743	3.03313	0.00442454	0.342633	1.1456	3.8593	0.000443824	0.0338422	0.651565	1.95703	0.0579794	0.124571
PLXNB2	-0.41715	-1.8837	0.0675428	0.456791	-0.840878	-3.85778	0.000445791	0.0338825	-1.18401	-4.84308	2.32522e-05	0.00081679
QSOX1	-0.370266	-2.24964	0.0305556	0.429556	-0.6246	-3.85554	0.000448705	0.0339844	-1.03316	-5.68607	1.71299e-06	0.000232287
TNF	-0.617362	-1.82917	0.0755045	0.458879	-1.28081	-3.85552	0.000448723	0.0339844	-1.79952	-4.82968	2.42273e-05	0.000838823
ITGB2	-0.429173	-1.9472	0.0591891	0.453826	-0.834168	-3.84518	0.000462398	0.0341743	-1.57748	-6.4832	1.4448e-07	0.000109602
PPM1M	-0.400097	-2.10255	0.0424218	0.443452	-0.719739	-3.84273	0.000465692	0.0341743	-1.25941	-5.99508	6.55662e-07	0.000183734
C6orf106	-0.446953	-2.49295	0.0173073	0.40113	-0.678021	-3.84218	0.000466431	0.0341743	-1.12566	-5.68732	1.70635e-06	0.000232123
SPI1	-0.459692	-2.29562	0.027509	0.425091	-0.758051	-3.84606	0.000461218	0.0341743	-1.24972	-5.65322	1.89714e-06	0.000243352
GNG5	-0.491329	-2.80735	0.0079493	0.365913	-0.662328	-3.84487	0.000462814	0.0341743	-1.07505	-5.56415	2.502e-06	0.000274738
FKBP5	0.464281	1.84234	0.0735122	0.458537	0.953298	3.84327	0.000464967	0.0341743	1.38185	4.96703	1.58876e-05	0.000640828
HEG1	-0.383129	-2.53457	0.0156557	0.399725	-0.571805	-3.84319	0.000465067	0.0341743	-0.824405	-4.94024	1.72523e-05	0.000668723
SLC41A2	-0.459864	-1.33148	0.19124	0.519796	-1.30828	-3.84848	0.000457982	0.0341743	-1.87444	-4.91613	1.85802e-05	0.000702523
RP4-580O19.2	0.811118	2.32833	0.0255115	0.425091	1.31969	3.8487	0.000457697	0.0341743	1.84153	4.78835	2.7498e-05	0.000902288
SGTA	-0.30858	-2.14287	0.0388196	0.440514	-0.544607	-3.84233	0.000466227	0.0341743	-0.76048	-4.7837	2.78927e-05	0.000907937
BTBD3	-0.351207	-2.48471	0.0176523	0.40358	-0.534588	-3.84252	0.000465973	0.0341743	-0.74572	-4.77899	2.82971e-05	0.000916385
SP110	-0.378521	-2.33223	0.025282	0.425091	-0.614807	-3.8486	0.000457826	0.0341743	-0.795262	-4.43852	7.96734e-05	0.00173458
RP11-321M21.4	0.406685	1.83312	0.0749022	0.458878	0.84136	3.85299	0.000452037	0.0341743	0.94818	3.87142	0.000428466	0.00500463
ANKRD33B	-0.185911	-1.22784	0.22732	0.545136	-0.573534	-3.84841	0.00045808	0.0341743	-0.556827	-3.33124	0.0019798	0.0137173
RP11-76K13.3	0.965721	2.69601	0.0105267	0.378578	1.3548	3.84262	0.000465841	0.0341743	1.26898	3.20903	0.0027638	0.0170823
MIR4458HG	-0.215764	-1.7085	0.0959847	0.467242	-0.478838	-3.85219	0.000453082	0.0341743	-0.412714	-2.96028	0.00535779	0.0259977
AP001462.6	0.395552	1.72086	0.0936939	0.466341	0.870548	3.84785	0.00045883	0.0341743	0.678763	2.6749	0.0110953	0.041534
KDM6B	-0.449398	-2.87052	0.00676208	0.363934	-0.59274	-3.8466	0.000460495	0.0341743	-0.462071	-2.67353	0.011133	0.0416234
HNRNPA3P6	0.408844	1.67762	0.101914	0.47183	0.922215	3.84462	0.000463145	0.0341743	0.607367	2.25754	0.0300113	0.0793373
AC083949.1	-0.413362	-2.46882	0.0183357	0.405119	-0.632625	-3.83875	0.000471098	0.0344571	-0.561652	-3.03861	0.00436101	0.0227348
BRCA2	-0.408527	-3.01217	0.00467607	0.347623	-0.512104	-3.8362	0.000474598	0.0346538	-0.535488	-3.57648	0.000998633	0.00870947
TKFC	-0.208285	-1.55997	0.127344	0.482707	-0.503876	-3.83412	0.000477461	0.0348033	-0.688317	-4.66976	3.95053e-05	0.0011178
SH3BGRL3	-0.392518	-2.36484	0.023436	0.421277	-0.625867	-3.83097	0.000481843	0.0350629	-1.02931	-5.61742	2.12034e-06	0.000256573
DIAPH1	-0.346875	-1.80198	0.0797628	0.459421	-0.725423	-3.82871	0.000485001	0.0352327	-1.05695	-4.97371	1.55641e-05	0.000638963
RP11-804F13.1	-0.0946614	-0.358414	0.722086	0.863268	0.994929	3.82726	0.000487044	0.035321	0.395641	1.35694	0.183084	0.28302
PABPC1L2B	0.624905	1.75669	0.0873069	0.462974	1.33974	3.82637	0.000488299	0.035352	1.11272	2.83345	0.00743702	0.0322576
C17orf98	0.991754	3.57574	0.00100072	0.300832	1.04441	3.82574	0.0004892	0.0353574	1.41002	4.60505	4.81085e-05	0.00126407
TMEM234	-0.350841	-3.27734	0.0022951	0.321291	-0.402773	-3.82256	0.000493712	0.0356232	-0.424566	-3.59256	0.000954197	0.00843164
PKIG	-0.158689	-1.08482	0.285073	0.585935	-0.550156	-3.82104	0.000495899	0.0356605	-0.688236	-4.26184	0.000135446	0.00239927
AC093690.1	-0.0772656	-0.400779	0.690906	0.846806	-0.725077	-3.82108	0.000495839	0.0356605	0.148704	0.698695	0.489144	0.588723
GXYLT1P2	0.926042	2.73537	0.00953786	0.369421	1.27304	3.82041	0.000496795	0.0356649	1.48196	3.96525	0.00032584	0.00422534
LPIN2	-0.477575	-3.00534	0.00476082	0.348216	-0.597418	-3.81957	0.000498005	0.0356918	-0.780099	-4.44682	7.77025e-05	0.00171169
TRAFD1	-0.438899	-1.81568	0.0775929	0.458986	-0.908548	-3.81861	0.000499401	0.0357318	-1.65276	-6.19343	3.54254e-07	0.000148353
RP11-285G1.15	0.959361	3.38548	0.00170455	0.307213	1.06475	3.81742	0.000501114	0.0357945	0.9551	3.05305	0.00419748	0.0221681
SLC9A7	-0.393888	-2.01274	0.0515191	0.448873	-0.73478	-3.81465	0.000505148	0.0359927	-1.12594	-5.21167	7.46595e-06	0.00042864
CYP46A1	0.262816	1.62906	0.111851	0.476699	0.605694	3.81436	0.000505575	0.0359927	0.655771	3.68201	0.000739759	0.00710716
PTGS1	-0.353252	-1.59979	0.118216	0.478932	-0.828852	-3.81363	0.000506639	0.0360085	-1.3077	-5.36457	4.64909e-06	0.000349722
QPCT	-0.701564	-1.62243	0.113266	0.477278	-1.62239	-3.81188	0.000509219	0.0361317	-2.48197	-5.19929	7.75746e-06	0.000435427
XXyac-YR21CG7.1	0.943405	3.04091	0.00433458	0.342022	1.16352	3.81033	0.000511505	0.0361844	1.58655	4.63238	4.42699e-05	0.0012058
TBKBP1	-0.485123	-3.61711	0.000890009	0.300832	-0.502987	-3.81023	0.000511656	0.0361844	-0.518937	-3.50487	0.00122189	0.00994317
KIF13A	-0.300217	-2.6427	0.0120174	0.386887	-0.425667	-3.80686	0.000516668	0.0362583	-0.678484	-5.41003	4.03752e-06	0.000326634
FCAR	-0.455248	-1.5636	0.126491	0.482675	-1.09096	-3.80689	0.000516621	0.0362583	-1.58635	-4.93542	1.75104e-05	0.000675913
SEMA7A	-0.439666	-1.6585	0.105735	0.475244	-0.993271	-3.80667	0.000516945	0.0362583	-1.43871	-4.91604	1.85854e-05	0.000702523
BARHL2	0.547477	2.6966	0.0105112	0.378578	0.760863	3.8075	0.0005157	0.0362583	0.768429	3.42848	0.00151275	0.0114793
SORT1	-0.61083	-3.61737	0.000889362	0.300832	-0.632932	-3.80815	0.000514744	0.0362583	-0.493565	-2.64767	0.0118705	0.0433327
GGT5	-0.239092	-0.860772	0.394949	0.665336	-1.04055	-3.80601	0.000517938	0.0362684	-1.02155	-3.33142	0.00197882	0.0137127
RNASE6	0.454518	1.88061	0.0679739	0.456803	0.904541	3.80242	0.000523335	0.0365863	0.726234	2.7219	0.00986611	0.0385414
ADO	-0.471235	-2.0945	0.043175	0.443591	-0.841725	-3.80099	0.000525495	0.0366773	-1.12407	-4.52568	6.12137e-05	0.00147714
LYN	-0.381084	-1.7423	0.0898277	0.464262	-0.817833	-3.79883	0.000528793	0.0367873	-1.47524	-6.10957	4.59525e-07	0.000157953
FAM225A	-0.694337	-2.68923	0.0107062	0.379177	-0.96551	-3.79926	0.000528138	0.0367873	-0.971518	-3.40845	0.00159937	0.011906
PLCG2	-0.226836	-1.62964	0.111727	0.476602	-0.520016	-3.79562	0.00053372	0.0368968	-0.901603	-5.86739	9.74981e-07	0.000186173
GOLGA6L5P	1.3403	3.24675	0.00249476	0.324742	1.54248	3.7962	0.000532831	0.0368968	1.93912	4.25499	0.000138247	0.00242882
BCAR3	-0.330976	-2.06946	0.0455942	0.44458	-0.597489	-3.79555	0.000533822	0.0368968	-0.702014	-3.97608	0.000315669	0.00413867
FHOD1	-0.336655	-2.32109	0.0259421	0.425091	-0.541859	-3.79556	0.000533808	0.0368968	-0.633122	-3.95404	0.000336717	0.00432048
GPC4	-0.999767	-1.96787	0.0566702	0.450643	-1.89711	-3.7938	0.000536531	0.0370241	-2.57543	-4.59193	5.00662e-05	0.00129448
RP11-73M18.11	1.0186	3.49878	0.00124296	0.300832	1.08688	3.79296	0.000537828	0.0370537	1.29654	4.03409	0.000266209	0.0037197
RP11-647F2.2	1.06803	3.68365	0.000736286	0.300832	1.0822	3.79217	0.000539056	0.0370785	1.38058	4.31324	0.000116133	0.00217638
PSMD2	-0.327446	-2.00681	0.0521753	0.449167	-0.608667	-3.78992	0.000542582	0.0370822	-1.045	-5.80136	1.19706e-06	0.000202104
HCAR3	-0.650895	-2.00919	0.0519107	0.449099	-1.20898	-3.79152	0.000540081	0.0370822	-1.59406	-4.4572	7.53045e-05	0.00167706
FAM71C	0.686635	2.65781	0.0115763	0.385465	0.963797	3.79024	0.000542073	0.0370822	1.17549	4.12159	0.00020559	0.00313493
PRSS36	0.422904	3.19039	0.00290672	0.328535	0.494487	3.79	0.000542446	0.0370822	0.407956	2.7878	0.00835445	0.0346776
EYA3	-0.345149	-2.15667	0.0376508	0.439625	-0.596644	-3.7877	0.000546067	0.0371421	-0.908777	-5.14377	9.21052e-06	0.00047951
PSMC5	-0.266407	-1.7165	0.0944969	0.467236	-0.578698	-3.7882	0.000545268	0.0371421	-0.756617	-4.41592	8.52929e-05	0.00180426
NUPR1	0.399761	1.88143	0.0678604	0.456803	0.792271	3.78829	0.000545131	0.0371421	0.660542	2.81601	0.00777579	0.0331778
LITAF	-0.342774	-1.93522	0.060693	0.454818	-0.659732	-3.78421	0.000551597	0.0371695	-1.26878	-6.48871	1.42041e-07	0.000109602
CSTB	-0.436269	-2.11816	0.040994	0.443248	-0.767207	-3.78442	0.000551254	0.0371695	-1.28399	-5.64692	1.93465e-06	0.000245948
PSME3	-0.261899	-1.81767	0.0772813	0.458986	-0.536696	-3.78437	0.000551341	0.0371695	-0.848734	-5.33581	5.08268e-06	0.000366057
P3H4	0.298856	2.4101	0.021076	0.413863	0.461723	3.78302	0.000553488	0.0371695	0.579929	4.23639	0.000146139	0.00251708
C5orf56	-0.341968	-1.83656	0.0743813	0.458694	-0.693803	-3.78563	0.00054933	0.0371695	-0.865853	-4.21222	0.000157063	0.00263819
NUDT17	0.38136	2.37159	0.0230698	0.419875	0.598677	3.78251	0.000554301	0.0371695	0.733653	4.13278	0.000198885	0.00307136
RP11-456N14.6	0.766458	3.2074	0.00277599	0.328535	0.889944	3.78366	0.000552472	0.0371695	1.06379	4.03246	0.000267485	0.00372656
HIVEP3	-0.259845	-2.04163	0.0484226	0.44684	-0.473967	-3.7835	0.000552725	0.0371695	-0.447747	-3.1867	0.00293576	0.0177333
RP11-575L7.2	0.933737	2.82314	0.00763568	0.365913	1.23249	3.78594	0.00054885	0.0371695	0.836495	2.29096	0.0278048	0.0753988
TAGLN2	-0.317649	-1.6427	0.108983	0.476197	-0.719807	-3.7819	0.000555278	0.0371766	-1.37691	-6.45004	1.60067e-07	0.000109602
CHD3	-0.354055	-2.32687	0.0255976	0.425091	-0.566288	-3.78113	0.000556511	0.0371859	-0.94835	-5.64569	1.94201e-06	0.000246065
ARNTL2	-0.384948	-1.02056	0.314141	0.608056	-1.40346	-3.78024	0.000557938	0.0371859	-2.24983	-5.40297	4.12705e-06	0.000328699
HMGCS1	-0.451617	-2.08706	0.0438818	0.44439	-0.805128	-3.78019	0.000558028	0.0371859	-1.23215	-5.15794	8.81567e-06	0.00046836
NDRG2	-0.415446	-3.34891	0.00188574	0.320558	-0.461491	-3.77952	0.000559104	0.0371996	-0.428012	-3.12531	0.0034626	0.0197312
RUBCNL	-0.266247	-1.65297	0.106864	0.475244	-0.598183	-3.7731	0.000569549	0.0374986	-1.01183	-5.69029	1.69067e-06	0.000230725
GNB1	-0.383455	-2.26014	0.0298343	0.428777	-0.629818	-3.77155	0.000572103	0.0374986	-0.947821	-5.06052	1.19105e-05	0.000551783
MOV10	-0.390369	-2.17517	0.0361319	0.436685	-0.66646	-3.77291	0.000569868	0.0374986	-0.92924	-4.69023	3.71154e-05	0.00107849
ARL11	-0.326264	-2.2633	0.0296207	0.428777	-0.535485	-3.77401	0.000568055	0.0374986	-0.723382	-4.54556	5.7635e-05	0.00141487
RP4-697K14.3	1.14393	3.20583	0.00278779	0.328535	1.32457	3.77138	0.000572377	0.0374986	1.75572	4.45703	7.5343e-05	0.00167706
PYHIN1	-0.357497	-2.39209	0.021988	0.416969	-0.555071	-3.77345	0.000568978	0.0374986	-0.702473	-4.25778	0.000137096	0.00241487
RP11-462H3.2	0.685588	2.7307	0.00965045	0.369887	0.931984	3.77141	0.00057233	0.0374986	0.94164	3.39738	0.00164925	0.0121544
EEF1DP6	0.892782	2.48459	0.0176576	0.40358	1.33469	3.77373	0.000568511	0.0374986	1.21545	3.06403	0.00407704	0.0217743
CEBPD	0.357343	1.6446	0.108588	0.476117	0.807336	3.77496	0.000566506	0.0374986	0.692931	2.88876	0.00645139	0.0293521
DNAJB5	-0.432568	-1.95202	0.0585939	0.452504	-0.822922	-3.77286	0.000569939	0.0374986	-0.694776	-2.84002	0.00731299	0.0318879
C15orf48	-1.11056	-1.64026	0.10949	0.476197	-2.51132	-3.76841	0.000577306	0.0377636	-4.4693	-5.97942	6.88352e-07	0.000183734
ST8SIA1	-0.3496	-2.75906	0.0089852	0.366097	-0.469729	-3.76634	0.000580746	0.0378466	-0.466908	-3.33786	0.00194406	0.0135598
SCG5	-0.552322	-2.2057	0.0337444	0.434392	-0.928464	-3.76707	0.000579532	0.0378466	-0.913437	-3.30431	0.00213175	0.0144031
MANSC1	0.30565	1.88939	0.066756	0.456018	0.599659	3.76604	0.000581254	0.0378466	0.567796	3.17934	0.00299472	0.0179814
ZCCHC2	-0.552008	-3.30903	0.00210433	0.320558	-0.618281	-3.76552	0.000582119	0.0378466	-0.580439	-3.15181	0.00322505	0.0188787
SLC2A6	-0.40259	-1.06412	0.294223	0.59256	-1.40142	-3.76339	0.000585707	0.0379082	-2.45442	-5.87657	9.47551e-07	0.000186173
YWHAG	-0.409009	-2.17321	0.0362904	0.436685	-0.697148	-3.76338	0.000585729	0.0379082	-1.13367	-5.45634	3.49705e-06	0.0003061
TBC1D9	-0.331545	-1.43324	0.160249	0.500587	-0.856949	-3.76371	0.00058517	0.0379082	-1.14945	-4.50106	6.59526e-05	0.00154489
RFTN1	-0.317615	-1.70985	0.0957316	0.467242	-0.687735	-3.76152	0.00058887	0.0379866	-1.12883	-5.50472	3.00925e-06	0.0002898
SRGAP3	0.227241	1.60237	0.117642	0.478922	0.525011	3.76121	0.000589394	0.0379866	0.540052	3.44952	0.0014266	0.0110372
RP11-14I17.2	0.461554	2.50022	0.0170076	0.400271	0.683397	3.76109	0.000589608	0.0379866	0.135313	0.663964	0.510861	0.608111
CEP170	-0.421812	-2.51437	0.0164382	0.400271	-0.620838	-3.75986	0.000591684	0.0380057	-0.832019	-4.49253	6.76768e-05	0.00156566
SELENOP	1.21777	2.50714	0.0167269	0.400271	1.79769	3.76023	0.000591064	0.0380057	1.73689	3.23918	0.00254666	0.016154
PRDM10	-0.207759	-2.21112	0.0333359	0.432822	-0.347517	-3.75762	0.000595526	0.038195	-0.293801	-2.83239	0.00745717	0.0323154
RP11-321E2.4	0.702644	2.75081	0.00917418	0.368268	0.944382	3.75627	0.000597838	0.0382285	1.32915	4.71355	3.45646e-05	0.00102994
MCU	-0.36099	-2.66994	0.0112329	0.382321	-0.499901	-3.75642	0.000597581	0.0382285	-0.643582	-4.31179	0.000116637	0.00217846
KLK1	0.490007	2.07495	0.0450543	0.44458	0.872952	3.7556	0.000598998	0.0382455	0.989969	3.79729	0.000531144	0.00578328
NFKBIE	-0.329995	-1.22955	0.226688	0.544887	-0.991746	-3.75424	0.000601347	0.0383381	-1.87473	-6.32737	2.33931e-07	0.000126135
RP11-669N7.3	0.77556	3.15662	0.00318367	0.330138	0.907686	3.75341	0.000602783	0.0383724	1.10578	4.07681	0.000234699	0.00341574
PARP12	-0.429751	-1.72206	0.0934726	0.466272	-0.921641	-3.75213	0.000604998	0.0384561	-1.55883	-5.6582	1.86797e-06	0.000242524
RCC2	-0.395843	-2.19162	0.0348274	0.435603	-0.66647	-3.74893	0.000610593	0.0386037	-1.13926	-5.71362	1.57238e-06	0.000223413
HIST1H2AA	0.986928	2.8191	0.00771473	0.365913	1.2918	3.74889	0.000610663	0.0386037	2.00204	5.18018	8.22983e-06	0.000453012
RP5-898I4.1	0.621915	2.79656	0.00817056	0.365913	0.820555	3.74874	0.000610936	0.0386037	1.01798	4.14651	0.000190951	0.00298771
OR6E1P	0.54967	2.10034	0.0426275	0.443452	0.966031	3.75026	0.000608259	0.0386037	0.830905	2.87598	0.00666758	0.0299838
CD79B	-0.373364	-1.89951	0.0653737	0.455988	-0.724735	-3.74604	0.00061569	0.0386753	-1.2976	-5.97997	6.87174e-07	0.000183734
LARGE-AS1	0.54403	3.42145	0.0015426	0.307213	0.586477	3.74733	0.000613407	0.0386753	0.691025	3.93667	0.000354259	0.00445719
HMGB3P18	1.20997	2.52815	0.0159008	0.400229	1.76486	3.74646	0.000614957	0.0386753	1.84571	3.49332	0.00126214	0.0101645
RP11-561O23.7	0.774756	2.56784	0.0144409	0.396175	1.11256	3.74636	0.000615136	0.0386753	0.936208	2.81076	0.00788068	0.0334315
PTPRJ	-0.328246	-1.93148	0.0611703	0.455327	-0.626417	-3.74487	0.000617765	0.0387487	-0.962443	-5.12994	9.61278e-06	0.00048766
PDE4B	-0.340458	-1.8918	0.0664241	0.455988	-0.66299	-3.74286	0.000621355	0.0389167	-1.04678	-5.26885	6.25479e-06	0.00039572
AK1	-0.329011	-2.25153	0.0304247	0.429475	-0.538192	-3.74186	0.000623129	0.0389707	-0.294569	-1.82601	0.0759893	0.150106
TMEM43	-0.376521	-2.35712	0.023862	0.42251	-0.58823	-3.7413	0.000624143	0.038977	-0.888169	-5.03657	1.28236e-05	0.000575378
ST3GAL2	-0.386451	-2.42969	0.0201232	0.411348	-0.585587	-3.74052	0.000625549	0.0390078	-0.905855	-5.15897	8.78783e-06	0.000467462
TAP2	-0.354279	-1.56601	0.125925	0.482481	-0.832738	-3.73973	0.000626957	0.0390386	-1.49191	-5.97364	7.00832e-07	0.000183734
RP5-1086L22.1	0.827251	3.93549	0.00035548	0.280409	0.773625	3.73918	0.000627963	0.0390443	1.05985	4.56724	5.39644e-05	0.00135593
RP11-463D19.1	0.285481	1.93782	0.0603643	0.454752	0.541978	3.73768	0.000630671	0.0391557	0.328407	2.01928	0.050803	0.113883
APOC1	-0.528749	-2.62996	0.0124012	0.388214	-0.7382	-3.73042	0.000643954	0.0392809	-1.68626	-7.59751	4.83205e-09	5.16003e-05
SPRED1	-0.451685	-1.45961	0.152901	0.496795	-1.1351	-3.72666	0.000650953	0.0392809	-2.24321	-6.56626	1.11808e-07	0.000109602
DSEL	0.246291	1.11252	0.273146	0.576939	0.812608	3.72926	0.000646102	0.0392809	1.61673	6.61522	9.61462e-08	0.000109602
BANF1	-0.292689	-1.77363	0.0844188	0.461395	-0.606111	-3.73158	0.000641821	0.0392809	-1.16697	-6.40565	1.83608e-07	0.000114675
ADGRE1	-0.394745	-2.05143	0.0474097	0.44684	-0.70711	-3.73345	0.000638383	0.0392809	-1.29636	-6.10256	4.69625e-07	0.000157953
SLC1A4	-0.477603	-2.06329	0.0462091	0.445558	-0.850443	-3.73268	0.000639786	0.0392809	-1.45969	-5.71216	1.57955e-06	0.000223413
EPB41L2	-0.198779	-1.66701	0.104021	0.473545	-0.437412	-3.72683	0.000650622	0.0392809	-0.715024	-5.43168	3.77527e-06	0.000314348
MS4A2	-0.70515	-2.54657	0.0152072	0.399057	-1.01667	-3.73024	0.000644293	0.0392809	-1.63094	-5.33532	5.09043e-06	0.000366057
GNLY	-0.691053	-2.03906	0.0486911	0.447062	-1.24285	-3.72583	0.000652505	0.0392809	-1.99047	-5.32013	5.33591e-06	0.000374206
GPD2	-0.450138	-2.01134	0.0516726	0.448873	-0.820903	-3.72663	0.000651001	0.0392809	-1.28006	-5.18106	8.20766e-06	0.000452959
OPTN	-0.397072	-2.02954	0.0496971	0.447062	-0.718254	-3.72984	0.000645025	0.0392809	-1.05635	-4.89085	2.00813e-05	0.000735023
BICDL1	-0.319507	-2.21426	0.0331012	0.432371	-0.529518	-3.72831	0.000647868	0.0392809	-0.755475	-4.74259	3.16306e-05	0.000984768
LGALS13	0.516503	2.63743	0.0121749	0.386905	0.717956	3.72468	0.000654651	0.0392809	1.01379	4.68927	3.72239e-05	0.00107871
ITGB2-AS1	-0.215608	-1.34271	0.187608	0.517612	-0.589639	-3.73068	0.000643476	0.0392809	-0.786994	-4.43953	7.94309e-05	0.0017318
POLD1	-0.408262	-2.4744	0.0180933	0.40358	-0.605005	-3.7254	0.000653306	0.0392809	-0.793484	-4.35628	0.00010206	0.00202456
TMEM64	-0.416097	-2.53289	0.0157194	0.399907	-0.602727	-3.72758	0.000649226	0.0392809	-0.787512	-4.34237	0.000106414	0.00207461
CTC-499B15.7	0.471775	2.2752	0.028827	0.425116	0.761948	3.7333	0.000638648	0.0392809	0.993156	4.33859	0.000107628	0.00208446
DUOXA1	0.396103	2.0302	0.0496268	0.447062	0.715266	3.72463	0.000654758	0.0392809	0.913488	4.24113	0.000144086	0.00249377
C1orf122	-0.386916	-1.59128	0.12012	0.480504	-0.891759	-3.72616	0.000651885	0.0392809	-1.13003	-4.20987	0.000158165	0.0026463
HMGXB4	-0.23599	-1.95575	0.0581355	0.452324	-0.442862	-3.72883	0.000646898	0.0392809	-0.549999	-4.12886	0.000201206	0.003096
ADAMTSL4-AS1	-0.391694	-2.34215	0.0247071	0.425091	-0.614939	-3.73579	0.000634098	0.0392809	-0.754474	-4.08657	0.000228029	0.00335872
CTDNEP1	-0.425041	-2.45373	0.0190072	0.408708	-0.63551	-3.72736	0.000649631	0.0392809	-0.759995	-3.97424	0.000317373	0.0041521
RP11-779P15.2	1.46716	3.49274	0.0012642	0.300832	1.5428	3.73149	0.000641977	0.0392809	1.48992	3.21291	0.00273484	0.0169718
RP11-124N3.2	0.710925	2.50679	0.0167412	0.400271	1.0423	3.73395	0.000637459	0.0392809	0.912535	2.91468	0.00603285	0.0280916
NDFIP2	-0.400124	-2.02101	0.0506151	0.448749	-0.725379	-3.72239	0.000658965	0.0393206	-1.00074	-4.57872	5.21165e-05	0.00132352
RP11-98J9.3	0.566576	1.37405	0.177756	0.511274	1.51108	3.72318	0.000657474	0.0393206	1.52362	3.3471	0.00189518	0.0133453
NEXN	-0.517914	-3.39952	0.00163949	0.307213	-0.558312	-3.72324	0.00065737	0.0393206	-0.417657	-2.48329	0.0177126	0.0562898
RP11-170L3.4	-0.351339	-1.42581	0.162369	0.501841	-0.902806	-3.72232	0.000659103	0.0393206	-0.573413	-2.1079	0.0419271	0.0998505
RP11-219B4.5	0.792375	3.32709	0.0020025	0.320558	0.872445	3.72183	0.00066004	0.0393216	1.03837	3.94944	0.000341282	0.00435352
TRAF3	-0.265581	-1.28157	0.208027	0.531324	-0.758964	-3.72093	0.000661742	0.0393681	-1.39876	-6.11417	4.53013e-07	0.000157953
AC074011.2	0.867992	2.59351	0.0135633	0.393492	1.22523	3.71941	0.000664637	0.0394305	1.39723	3.78171	0.000555583	0.00594334
UBQLN1P1	0.151796	0.599891	0.552263	0.7665	0.926473	3.71989	0.000663714	0.0394305	0.704294	2.52124	0.0161681	0.052978
C1QC	0.722075	2.65093	0.0117751	0.385769	0.997036	3.71886	0.00066567	0.039437	0.371517	1.2355	0.224492	0.329038
RP4-672N11.1	1.05282	3.22172	0.00267033	0.328535	1.19561	3.71713	0.000668992	0.0395789	1.01214	2.80559	0.00798508	0.0337202
BCL11A	-0.291071	-1.8758	0.0686502	0.456803	-0.567536	-3.71591	0.000671339	0.0396629	-0.785274	-4.58412	5.12681e-05	0.00131133
SFXN4	-0.12563	-0.849435	0.401144	0.668925	-0.540669	-3.71409	0.000674851	0.0397056	-0.808598	-4.95241	1.66184e-05	0.000655327
CHST11	-0.410365	-2.05577	0.0469673	0.44684	-0.729891	-3.71488	0.00067332	0.0397056	-0.998682	-4.53187	6.0076e-05	0.00145704
ZNF513	-0.391113	-2.88522	0.00651056	0.361637	-0.49559	-3.71435	0.000674338	0.0397056	-0.56141	-3.7515	0.000606103	0.00625948
LILRB1	-0.387662	-1.39093	0.172617	0.507226	-1.01841	-3.71245	0.000678036	0.0397834	-1.66207	-5.40196	4.14e-06	0.000328699
CBLN4	0.64745	3.63218	0.000852696	0.300832	0.651423	3.71286	0.000677234	0.0397834	0.665375	3.38123	0.00172469	0.0125169
FZD1	-0.323353	-2.16166	0.037235	0.438342	-0.546424	-3.7113	0.000680274	0.0398014	-0.998612	-6.04723	5.57636e-07	0.000170656
RP11-35J1.2	0.542163	2.10087	0.042578	0.443452	0.942625	3.71101	0.00068083	0.0398014	0.719807	2.52658	0.0159611	0.0525498
IL10	0.357967	2.13479	0.0395188	0.442501	0.612459	3.71085	0.000681138	0.0398014	0.410242	2.21616	0.0329598	0.0846978
TCIRG1	-0.438595	-2.30074	0.0271877	0.425091	-0.69592	-3.70891	0.000684947	0.0399693	-1.17622	-5.58907	2.31563e-06	0.000268054
MYD88	-0.311862	-1.42857	0.161578	0.501414	-0.796152	-3.70526	0.000692132	0.040006	-1.40342	-5.82338	1.1179e-06	0.0001957
SLC27A3	-0.561281	-2.28723	0.0280439	0.425091	-0.895237	-3.70639	0.000689902	0.040006	-1.22093	-4.50678	6.48199e-05	0.00152813
SQLE	-0.342478	-1.49863	0.142518	0.490669	-0.833819	-3.70695	0.000688798	0.040006	-1.12703	-4.46731	7.30407e-05	0.0016438
RP11-439E19.6	0.788144	3.58859	0.000964998	0.300832	0.80108	3.70576	0.000691148	0.040006	1.04864	4.32506	0.000112088	0.00213648
DTX4	-0.224492	-1.7772	0.0838203	0.460899	-0.46074	-3.70573	0.000691201	0.040006	-0.51376	-3.68419	0.000735149	0.00708207
CTD-2086L14.1	1.34781	4.48458	6.9325e-05	0.204752	1.09636	3.7062	0.000690271	0.040006	1.06667	3.21494	0.00271988	0.0169126
NPR1	-0.530842	-2.1252	0.0403633	0.442925	-0.911157	-3.70606	0.000690564	0.040006	-0.571331	-2.07191	0.0453528	0.105245
ANXA11	-0.42206	-2.75581	0.00905921	0.366602	-0.558393	-3.70423	0.00069418	0.04007	-0.799059	-4.72608	3.32674e-05	0.00100824
SERTAD2	-0.463951	-2.72455	0.00980068	0.37146	-0.620778	-3.70376	0.000695115	0.04007	-0.487705	-2.59435	0.0135356	0.0473021
GSAP	-0.326797	-1.63601	0.110382	0.476197	-0.727563	-3.70052	0.00070161	0.0403587	-1.11218	-5.04346	1.25539e-05	0.000566253
MCAM	0.255212	1.96669	0.0568117	0.450643	0.47263	3.70031	0.000702014	0.0403587	0.622216	4.34332	0.00010611	0.00207198
ANKRD33B-AS1	0.495631	1.74664	0.0890601	0.463921	1.03301	3.69856	0.000705544	0.0405071	1.11549	3.5609	0.00104358	0.00895834
SIK3	-0.28099	-2.36105	0.023644	0.421277	-0.433163	-3.69786	0.000706956	0.0405337	-0.567062	-4.31613	0.000115132	0.00217333
LRRC8A	-0.442929	-2.71287	0.0100921	0.372764	-0.593991	-3.69623	0.000710281	0.0406153	-0.802176	-4.45053	7.6837e-05	0.00169881
LINC00370	1.43521	3.70362	0.000695395	0.300832	1.40991	3.69647	0.000709786	0.0406153	1.39282	3.25577	0.00243423	0.0157257
CYB561A3	-0.27443	-0.879969	0.384599	0.658311	-1.13337	-3.69226	0.000718394	0.0407789	-2.08772	-6.06396	5.29411e-07	0.000170656
BCAP31	-0.440125	-2.53234	0.0157403	0.399907	-0.631588	-3.69202	0.000718869	0.0407789	-1.0712	-5.58299	2.35982e-06	0.0002688
IRGQ	-0.328671	-2.18224	0.0355664	0.43571	-0.547357	-3.69229	0.000718332	0.0407789	-0.825118	-4.96255	1.61081e-05	0.000644851
CNFN	0.797385	3.31906	0.0020472	0.320558	0.873062	3.69212	0.000718676	0.0407789	1.31269	4.94945	1.67704e-05	0.000657571
RP11-297H3.3	0.61327	2.44399	0.0194526	0.410127	0.912396	3.69414	0.000714522	0.0407789	1.22722	4.43012	8.1718e-05	0.00176335
AC005578.3	0.391554	1.68967	0.099566	0.470408	0.842297	3.69282	0.000717229	0.0407789	0.958296	3.74591	0.000615931	0.00632427
PPIF	-0.383267	-1.78762	0.0820929	0.460293	-0.778956	-3.69123	0.000720502	0.0408173	-1.31318	-5.54812	2.62976e-06	0.000277359
RP11-104C4.6	0.593535	2.46721	0.0184063	0.405146	0.873672	3.68972	0.000723634	0.0409405	1.05437	3.97011	0.000321243	0.0041835
LL21NC02-1C16.2	-0.767591	-2.89731	0.00631039	0.360705	-0.961967	-3.68901	0.000725103	0.0409446	-1.22584	-4.19127	0.00016717	0.00274852
MINK1	-0.276755	-2.28198	0.028383	0.425091	-0.440281	-3.68833	0.00072651	0.0409446	-0.474078	-3.5409	0.00110415	0.00929335
RP11-361H10.5	0.401107	1.7272	0.0925365	0.465633	0.843062	3.68829	0.000726583	0.0409446	0.902057	3.51855	0.00117584	0.00969775
NSDHL	-0.206775	-1.38173	0.175405	0.509052	-0.543194	-3.68776	0.000727698	0.0409534	-0.782498	-4.73646	3.22281e-05	0.000991089
TIMM17A	-0.461799	-2.3555	0.0239518	0.422982	-0.711114	-3.68513	0.000733176	0.0412074	-1.20202	-5.55379	2.58386e-06	0.000277359
CCL1	-0.566057	-2.63858	0.0121402	0.386905	-0.777903	-3.684	0.000735555	0.0412868	-0.634728	-2.68007	0.0109534	0.0411896
ITPR1	-0.349827	-2.15389	0.037883	0.440397	-0.588708	-3.6826	0.0007385	0.0412893	-0.890591	-4.96703	1.58872e-05	0.000640828
RP11-13K12.6	0.622232	2.20507	0.0337923	0.434392	1.02306	3.68344	0.00073673	0.0412893	1.22261	3.92469	0.000366874	0.00455156
GPR150	0.460727	2.1659	0.036886	0.438195	0.771109	3.68294	0.000737798	0.0412893	0.885545	3.77097	0.000573059	0.00605306
ECEL1P3	0.932832	3.6308	0.000856042	0.300832	0.930429	3.67931	0.000745482	0.0416252	0.383064	1.35057	0.185097	0.285253
AGRN	-0.47781	-2.59626	0.0134722	0.392704	-0.666137	-3.6774	0.000749557	0.0417543	-0.9109	-4.48345	6.9562e-05	0.00159664
RP11-157J24.1	0.574353	2.25978	0.029859	0.428777	0.919827	3.67686	0.000750727	0.0417543	1.12773	4.01921	0.000278119	0.00381131
RP11-274B21.9	0.984116	3.54462	0.00109264	0.300832	1.00489	3.67726	0.000749868	0.0417543	1.15145	3.75679	0.000596939	0.00619491
AF241725.6	0.64242	1.92146	0.0624619	0.455813	1.20971	3.67601	0.000752537	0.0418005	0.586074	1.58786	0.120893	0.209337
ADPGK	-0.376542	-2.18181	0.0356	0.43571	-0.623121	-3.66826	0.000769382	0.0422962	-0.986245	-5.1765	8.32415e-06	0.000457026
LSS	-0.254436	-1.77753	0.0837642	0.460899	-0.516825	-3.66831	0.000769276	0.0422962	-0.798958	-5.05603	1.20765e-05	0.000554673
SH3BP1	-0.329661	-2.32463	0.0257302	0.425091	-0.51227	-3.67003	0.000765498	0.0422962	-0.780031	-4.98249	1.51487e-05	0.000630681
GSDMB	-0.348918	-2.73348	0.00958336	0.369421	-0.461006	-3.6693	0.000767112	0.0422962	-0.461336	-3.27384	0.00231713	0.0152276
RP11-379P1.4	0.648589	2.60446	0.0132043	0.391138	0.899536	3.66986	0.000765873	0.0422962	0.850354	3.0931	0.00377368	0.0207619
RN7SL200P	0.587473	2.18587	0.035279	0.43571	0.970948	3.67042	0.00076465	0.0422962	0.663051	2.23476	0.031604	0.0822849
SYNGR3	-0.320907	-2.28515	0.0281781	0.425091	-0.507471	-3.67138	0.000762554	0.0422962	-0.264619	-1.70688	0.0962884	0.177545
NREP	0.226777	2.3805	0.0225936	0.419403	0.343988	3.66857	0.000768701	0.0422962	0.0365261	0.347313	0.730339	0.792975
RP11-121A14.3	-0.447128	-1.93139	0.0611813	0.455327	-0.83561	-3.66713	0.000771877	0.0423244	-1.19249	-4.66594	3.99686e-05	0.00112839
FURIN	-0.55661	-3.34971	0.00188159	0.320558	-0.599779	-3.66718	0.000771771	0.0423244	-0.68561	-3.73751	0.000630985	0.00641726
RP11-107P7.2	1.02102	2.29655	0.0274505	0.425091	1.60427	3.66607	0.000774202	0.0423975	1.93573	3.94397	0.000346785	0.00438902
MED15P6	0.765837	2.76903	0.00876145	0.365913	0.997836	3.66551	0.000775449	0.0424114	1.27243	4.16747	0.000179426	0.0028722
FCER2	-0.489038	-2.11351	0.0414147	0.443248	-0.834684	-3.66494	0.000776707	0.0424259	-1.08461	-4.24602	0.000142	0.00246868
VAC14	-0.264729	-1.89623	0.0658194	0.455988	-0.503512	-3.66423	0.000778287	0.0424579	-0.640807	-4.1578	0.000184653	0.0029272
RARG	-0.32847	-2.77226	0.00869016	0.365913	-0.427177	-3.66294	0.000781159	0.0425602	-0.545236	-4.16841	0.000178929	0.0028679
GTPBP2	-0.374456	-2.59624	0.0134731	0.392704	-0.519866	-3.662	0.000783251	0.0426198	-0.731123	-4.59179	5.00881e-05	0.00129448
MB21D2	-0.252682	-0.996425	0.325565	0.616068	-0.913705	-3.66067	0.000786222	0.0426728	-1.52301	-5.44028	3.67581e-06	0.000312773
AC003009.1	1.17997	3.1963	0.00286063	0.328535	1.33021	3.66082	0.000785895	0.0426728	1.75157	4.29784	0.000121615	0.00224591
DNMT1	-0.357692	-2.23795	0.0313762	0.429701	-0.57567	-3.65931	0.000789291	0.0426767	-0.981058	-5.56012	2.5336e-06	0.000276084
NPIPB6	0.388091	1.42182	0.163518	0.50264	0.98321	3.65966	0.000788504	0.0426767	0.965228	3.20323	0.00280752	0.0172471
HNRNPA1P73	0.67927	2.45016	0.0191694	0.409367	0.998688	3.65987	0.000788036	0.0426767	0.905439	2.95841	0.00538395	0.0260802
TNFRSF4	-0.371273	-0.941398	0.352653	0.63509	-1.41975	-3.65742	0.000793556	0.042853	-1.91092	-4.38905	9.24841e-05	0.00189905
CYP1B1	-0.690246	-3.14907	0.00324887	0.332144	-0.788941	-3.65685	0.00079484	0.0428682	-0.986077	-4.07509	0.000235893	0.00342378
PGD	-0.399838	-1.76516	0.0858524	0.462239	-0.813494	-3.6487	0.000813518	0.0429462	-1.57523	-6.29931	2.55166e-07	0.000128892
NDUFA9	-0.299284	-2.12268	0.0405883	0.442925	-0.506299	-3.64831	0.000814438	0.0429462	-0.858655	-5.51654	2.90085e-06	0.000285483
PSMA6	-0.300002	-1.70661	0.0963403	0.467739	-0.631183	-3.64794	0.000815289	0.0429462	-1.01999	-5.25594	6.50984e-06	0.000400397
HLA-F	-0.384683	-2.0945	0.043175	0.443591	-0.660465	-3.65351	0.000802443	0.0429462	-1.05778	-5.21699	7.34421e-06	0.000424503
DPH3	-0.423611	-2.38448	0.0223841	0.419357	-0.637884	-3.64798	0.000815183	0.0429462	-1.01414	-5.17099	8.46721e-06	0.000461323
TNFRSF10B	-0.363777	-2.22303	0.032453	0.430927	-0.588659	-3.65475	0.000799605	0.0429462	-0.925058	-5.12067	9.892e-06	0.000495381
HERC6	-0.628195	-2.53756	0.015543	0.399725	-0.888825	-3.64771	0.00081581	0.0429462	-1.29386	-4.73432	3.24401e-05	0.00099403
PPP1R15A	-0.480737	-2.3116	0.0265162	0.425091	-0.747248	-3.65052	0.000809323	0.0429462	-1.07718	-4.6918	3.69372e-05	0.00107601
TNK2	-0.37541	-2.97336	0.00517764	0.35047	-0.454188	-3.65478	0.000799552	0.0429462	-0.621239	-4.45705	7.53385e-05	0.00167706
RP1-249F5.3	1.03134	3.14975	0.003243	0.332144	1.17693	3.6518	0.000806369	0.0429462	1.50444	4.16193	0.000182403	0.00290116
AC099344.3	1.55636	3.60832	0.000912488	0.300832	1.55025	3.65156	0.00080691	0.0429462	1.9519	4.09919	0.000219678	0.00327295
KRTAP4-16	0.292019	0.9869	0.33015	0.619397	1.06288	3.64947	0.000811746	0.0429462	1.33387	4.08342	0.000230162	0.00337268
DLG5-AS1	0.504562	2.64538	0.0119381	0.386856	0.685718	3.6526	0.000804529	0.0429462	0.835609	3.96847	0.000322785	0.00419718
FAM222A	0.465209	2.58299	0.0139168	0.394734	0.647276	3.65131	0.000807495	0.0429462	0.780936	3.9277	0.000363662	0.00452353
GRB10	0.254218	2.39431	0.0218739	0.416969	0.38173	3.6527	0.000804299	0.0429462	0.409923	3.49722	0.00124841	0.0100902
S100A10	-0.406186	-2.32848	0.0255021	0.425091	-0.627067	-3.65213	0.000805609	0.0429462	-0.65857	-3.41978	0.0015498	0.0116466
RP11-21L23.2	0.64227	3.06323	0.00408574	0.342022	0.754066	3.65388	0.000801594	0.0429462	0.752254	3.24992	0.00247328	0.0158723
SLC38A2	-0.573217	-2.97878	0.00510458	0.35047	-0.690856	-3.64746	0.000816394	0.0429462	-0.682393	-3.2122	0.00274016	0.016985
TRIP10	-0.172262	-1.36091	0.181837	0.513918	-0.455245	-3.654	0.000801336	0.0429462	-0.424604	-3.03858	0.00436131	0.0227348
AC064853.3	0.636179	2.31238	0.0264684	0.425091	0.987735	3.64758	0.000816116	0.0429462	0.790622	2.60314	0.013247	0.046637
FLVCR2	-0.321997	-1.64464	0.108579	0.476117	-0.702035	-3.64303	0.000826769	0.0434101	-0.76076	-3.51978	0.00117179	0.00967766
ARL4A	-0.636206	-3.58085	0.000986363	0.300832	-0.63704	-3.64283	0.000827246	0.0434101	-0.432611	-2.20563	0.0337498	0.0861236
RPS2P36	-0.33853	-1.86663	0.0699548	0.456803	-0.649913	-3.64082	0.000831996	0.0436058	-0.765385	-3.82285	0.0004933	0.00549877
MRPL14	-0.357662	-1.729	0.0922098	0.465633	-0.740916	-3.63894	0.000836442	0.043678	-1.27234	-5.57152	2.44544e-06	0.000273647
SSBP3	-0.175913	-1.95172	0.0586301	0.452504	-0.322834	-3.63902	0.000836262	0.043678	-0.387597	-3.89537	0.000399622	0.00479359
NUP188	-0.27232	-2.0036	0.0525337	0.449167	-0.486831	-3.63909	0.000836096	0.043678	-0.569321	-3.79433	0.000535703	0.00580334
LINC01354	0.675226	2.93342	0.00574624	0.355211	0.824203	3.63784	0.000839071	0.0437618	1.01488	3.9938	0.000299679	0.00400574
RP11-244B22.11	0.608684	2.24556	0.0308399	0.429556	0.97003	3.63581	0.000843928	0.0439614	1.10224	3.68346	0.000736689	0.00709051
HNRNPM	-0.290877	-1.95892	0.0577492	0.451652	-0.531294	-3.63518	0.000845452	0.0439829	-0.820346	-5.0044	1.41605e-05	0.000606809
AC008592.4	0.877913	3.0988	0.00371685	0.338618	1.01351	3.63459	0.000846868	0.0439829	1.313	4.19811	0.0001638	0.00270876
ACSM4	0.487416	2.89461	0.00635459	0.360705	0.602357	3.63436	0.000847429	0.0439829	0.684501	3.68224	0.000739267	0.00710716
ZFAND3	-0.265836	-2.0673	0.0458085	0.44458	-0.459816	-3.63294	0.00085086	0.0440817	-0.742444	-5.23	7.05424e-06	0.000416766
CMTR1	-0.344995	-2.08554	0.0440279	0.44439	-0.591483	-3.63272	0.000851397	0.0440817	-0.877192	-4.80339	2.62606e-05	0.000881165
MKNK1	-0.24529	-1.71569	0.0946458	0.467236	-0.510391	-3.62699	0.000865381	0.0442253	-0.877559	-5.56011	2.53365e-06	0.000276084
PPP1R18	-0.277576	-1.59546	0.119181	0.479736	-0.620868	-3.62565	0.000868665	0.0442253	-1.03945	-5.41196	4.01349e-06	0.000326634
PCYT1A	-0.284836	-1.93291	0.0609867	0.455124	-0.525923	-3.62596	0.000867912	0.0442253	-0.868298	-5.33744	5.05704e-06	0.000366057
FCHSD2	-0.301559	-1.9101	0.0639542	0.455813	-0.564018	-3.62962	0.000858922	0.0442253	-0.888785	-5.09952	1.05598e-05	0.000508198
RP11-180I4.2	0.968877	3.99072	0.000302398	0.263611	0.866533	3.6262	0.000867315	0.0442253	1.31634	4.91133	1.88565e-05	0.00070716
CD151	-0.433684	-2.67871	0.0109906	0.380175	-0.57802	-3.62725	0.000864731	0.0442253	-0.790422	-4.4224	8.36434e-05	0.00178331
TELO2	-0.254588	-2.05671	0.0468714	0.44684	-0.441944	-3.62733	0.000864548	0.0442253	-0.567318	-4.15154	0.000188118	0.00296184
C15orf53	0.461644	3.04131	0.00432999	0.342022	0.54233	3.62995	0.000858125	0.0442253	0.69224	4.13102	0.000199925	0.00308141
AC108463.2	0.82682	2.76607	0.00882748	0.365913	1.0677	3.62899	0.000860474	0.0442253	1.28497	3.89398	0.000401246	0.00480628
ARL2BPP7	1.08493	3.03757	0.00437303	0.342022	1.27579	3.62901	0.000860427	0.0442253	1.36332	3.45755	0.001395	0.0108547
MTATP6P3	1.52861	3.59402	0.000950252	0.300832	1.51814	3.62643	0.000866745	0.0442253	1.59015	3.38665	0.00169902	0.012393
AC007403.3	0.686036	1.97202	0.056175	0.450341	1.24293	3.62991	0.000858226	0.0442253	1.04676	2.72559	0.00977512	0.0383231
RP11-1338A24.1	0.857303	2.47542	0.0180492	0.40358	1.23702	3.6289	0.000860674	0.0442253	0.998116	2.61062	0.0130061	0.0460849
ANGPTL1	-0.131365	-0.740757	0.463552	0.710822	-0.633232	-3.62778	0.000863424	0.0442253	-0.426703	-2.17956	0.0357801	0.0895235
SZRD1	-0.389006	-2.13313	0.0396644	0.442603	-0.650653	-3.62488	0.000870583	0.0442702	-1.07016	-5.31568	5.41002e-06	0.000374666
SLC3A2	-0.398297	-2.16029	0.0373489	0.438888	-0.657365	-3.62239	0.000876762	0.0443221	-1.10603	-5.434	3.74818e-06	0.000313931
UBTD1	-0.563	-2.30451	0.0269529	0.425091	-0.871044	-3.62238	0.000876793	0.0443221	-1.10012	-4.07903	0.000233166	0.00340197
CECR7	0.452573	3.17638	0.00301865	0.328535	0.508012	3.62245	0.000876613	0.0443221	0.620371	3.94406	0.000346693	0.00438902
SLC30A4	-0.34187	-2.43917	0.019676	0.410346	-0.499871	-3.62346	0.000874093	0.0443221	-0.474211	-3.06479	0.00406877	0.0217491
CTTN	-0.593513	-2.8621	0.00691011	0.363953	-0.739395	-3.62256	0.000876348	0.0443221	-0.528756	-2.30971	0.0266318	0.0732173
GLIPR2	-0.398533	-1.44928	0.155745	0.498028	-0.979725	-3.61974	0.000883377	0.0445095	-1.88517	-6.20995	3.36569e-07	0.000145217
CD9	-0.660597	-2.52846	0.0158889	0.400229	-0.930815	-3.61964	0.000883626	0.0445095	-1.62785	-5.6439	1.95285e-06	0.000246065
MMP12	-0.437579	-0.91415	0.366602	0.644982	-1.70556	-3.62003	0.000882662	0.0445095	-2.12589	-4.02299	0.000275043	0.00378983
ZBTB17	-0.333707	-2.41693	0.0207394	0.412325	-0.491785	-3.61874	0.000885903	0.0445717	-0.605147	-3.97015	0.000321202	0.0041835
FBXO24	0.305433	1.9986	0.053096	0.449167	0.544238	3.61812	0.000887461	0.0445976	0.701133	4.15584	0.000185734	0.00293694
GADD45G	-0.468129	-1.72013	0.0938273	0.466531	-0.968911	-3.61713	0.00088996	0.0446706	-1.11801	-3.72127	0.000661097	0.0066195
CD226	-0.4828	-2.62213	0.0126429	0.389854	-0.655433	-3.61659	0.000891331	0.0446869	-0.782452	-3.84939	0.000456776	0.00522528
CFAP44-AS1	0.387336	2.20296	0.033953	0.434502	0.625794	3.61605	0.000892695	0.0447028	0.474691	2.44556	0.01938	0.0597745
HSD3B7	-0.532213	-1.78449	0.0826081	0.460293	-1.0604	-3.61229	0.000902278	0.0447599	-2.26087	-6.86678	4.43781e-08	0.000109602
TM4SF19	-0.782439	-1.81608	0.0775298	0.458986	-1.53276	-3.61445	0.000896761	0.0447599	-2.77292	-5.83	1.09511e-06	0.000194465
PARP10	-0.373389	-1.66334	0.104759	0.474434	-0.798042	-3.61183	0.000903453	0.0447599	-1.34723	-5.43637	3.72069e-06	0.000313931
HSPB1	-0.35093	-1.32193	0.194368	0.52187	-0.944561	-3.61494	0.000895517	0.0447599	-1.56175	-5.32899	5.19127e-06	0.000367138
KRT41P	0.733668	2.74949	0.00920482	0.368268	0.948303	3.61063	0.000906533	0.0447599	1.22905	4.17224	0.000176904	0.00284761
RPL7P7	0.82305	3.51287	0.00119477	0.300832	0.832777	3.61117	0.000905148	0.0447599	1.0569	4.08618	0.000228292	0.00335911
ANKRD28	-0.427006	-2.63653	0.0122019	0.386905	-0.575517	-3.61027	0.000907459	0.0447599	-0.673941	-3.76936	0.000575714	0.00606384
MCOLN2	-0.180492	-0.624718	0.536019	0.756694	-1.02715	-3.61198	0.000903058	0.0447599	-1.1614	-3.64131	0.000830834	0.00769828
RP11-404O13.1	0.573804	2.16517	0.0369455	0.438195	0.941849	3.61073	0.000906288	0.0447599	1.0633	3.63439	0.000847349	0.00779886
POU2F2	-0.201195	-1.85797	0.0712055	0.457304	-0.384983	-3.612	0.000903016	0.0447599	-0.416436	-3.48352	0.00129728	0.0103427
AGBL4-IT1	0.828612	3.40263	0.00162538	0.307213	0.866069	3.61327	0.000899767	0.0447599	0.910112	3.38538	0.00170502	0.012422
RP11-862L9.3	0.309227	1.54497	0.13093	0.484592	0.711867	3.61347	0.00089926	0.0447599	0.529708	2.39732	0.0217198	0.0643118
LYPLA2P3	0.376621	1.40735	0.167732	0.504657	0.951783	3.61343	0.000899355	0.0447599	0.536123	1.81472	0.0777422	0.152585
CCDC88B	-0.345104	-2.76649	0.00881802	0.365913	-0.443182	-3.60948	0.000909495	0.0448086	-0.593352	-4.30863	0.000117749	0.00219634
ZNFX1	-0.426609	-2.29334	0.0276535	0.425091	-0.659991	-3.60463	0.000922101	0.0450993	-1.08581	-5.28736	5.90613e-06	0.000390527
TNFAIP8L1	-0.203884	-1.3806	0.17575	0.509546	-0.523935	-3.6045	0.000922444	0.0450993	-0.810066	-4.96881	1.58008e-05	0.000640828
SLC25A13	-0.281823	-1.85279	0.071963	0.457884	-0.539728	-3.60502	0.00092108	0.0450993	-0.742671	-4.42276	8.35519e-05	0.00178331
HAPLN2	0.558157	2.2753	0.0288203	0.425116	0.870379	3.60474	0.000921806	0.0450993	1.10449	4.07841	0.000233593	0.00340589
SGCA	0.738741	3.7011	0.000700433	0.300832	0.708119	3.60437	0.000922785	0.0450993	0.862923	3.91615	0.00037614	0.00461317
RP11-676B18.1	0.636047	2.8744	0.0066949	0.363934	0.785278	3.60549	0.000919856	0.0450993	0.860369	3.522	0.00116448	0.00964374
LINC00934	0.414768	2.14822	0.0383622	0.440514	0.685236	3.60577	0.000919125	0.0450993	0.735039	3.44851	0.00143062	0.0110503
PSMB7	-0.319582	-1.85811	0.0711853	0.457304	-0.609296	-3.59915	0.000936537	0.045123	-1.10945	-5.84308	1.05148e-06	0.000188714
CREB3	-0.314595	-1.89374	0.0661583	0.455988	-0.588278	-3.59779	0.000940172	0.045123	-1.0092	-5.50292	3.02617e-06	0.0002898
ACSL4	-0.518005	-2.15028	0.0381879	0.440397	-0.853686	-3.60033	0.000933403	0.045123	-1.42665	-5.36448	4.65041e-06	0.000349722
SLC5A2	0.18957	1.29143	0.204625	0.52912	0.520089	3.59968	0.000935136	0.045123	0.761409	4.6986	3.61793e-05	0.00106359
ADAM17	-0.408141	-2.32578	0.0256621	0.425091	-0.621888	-3.60043	0.000933145	0.045123	-0.888348	-4.58552	5.10502e-05	0.00130826
PTPN7	-0.372977	-2.04153	0.0484324	0.44684	-0.647461	-3.60057	0.000932769	0.045123	-0.89784	-4.45165	7.65784e-05	0.00169484
MZT1	-0.374483	-1.75271	0.087998	0.46344	-0.756653	-3.59798	0.000939652	0.045123	-0.98556	-4.17839	0.000173698	0.00281394
PPTC7	-0.405521	-2.32077	0.0259612	0.425091	-0.618999	-3.59908	0.000936728	0.045123	-0.744964	-3.8619	0.00044049	0.00510182
GPRIN2	0.711404	3.47408	0.00133199	0.301693	0.725375	3.5989	0.000937197	0.045123	0.864248	3.82305	0.000493021	0.00549877
RP11-632P5.1	0.837583	2.6593	0.0115334	0.385465	1.11557	3.59848	0.000938329	0.045123	1.14788	3.30128	0.00214954	0.0144714
OLFML2B	0.67848	3.91768	0.000374459	0.280409	0.613961	3.60177	0.000929602	0.045123	0.60333	3.15569	0.0031916	0.01875
GUCY1A2	0.422555	2.51674	0.0163448	0.400271	0.594574	3.59786	0.00093997	0.045123	0.528536	2.85152	0.00710048	0.031242
QPRT	0.267581	1.99732	0.0532414	0.449449	0.475007	3.60226	0.000928329	0.045123	0.367516	2.48493	0.0176429	0.0561396
ZNF706	-0.379207	-2.53295	0.0157174	0.399907	-0.530257	-3.59848	0.00093832	0.045123	-0.407286	-2.46432	0.0185339	0.0580407
OR2W3	0.00922073	0.0451524	0.96423	0.984956	0.723233	3.59814	0.000939234	0.045123	0.520647	2.30944	0.0266485	0.0732303
MT1G	-0.563653	-1.57544	0.123732	0.481206	-1.26882	-3.6031	0.000926125	0.045123	-0.868397	-2.19866	0.0342827	0.086995
SNORD116-6	0.362527	1.91186	0.0637216	0.455813	0.671349	3.59706	0.000942119	0.0451657	0.575411	2.74878	0.00922117	0.0369808
TRAJ32	-0.49362	-2.25086	0.0304705	0.429554	-0.776214	-3.59602	0.000944881	0.0451967	-0.974646	-4.0258	0.000272785	0.00377469
SP7	0.314795	1.90448	0.0647045	0.45591	0.585052	3.59606	0.000944787	0.0451967	0.717195	3.93037	0.000360843	0.00450025
SREBF1	-0.31185	-1.69602	0.0983463	0.469341	-0.650723	-3.59554	0.000946164	0.0452074	-1.11727	-5.50417	3.01441e-06	0.0002898
TRBV12-3	-0.512391	-2.69751	0.0104873	0.378578	-0.672007	-3.59434	0.000949411	0.0452751	-1.01197	-4.82587	2.45121e-05	0.000845066
TANK	-0.450741	-2.1308	0.0398685	0.442695	-0.748352	-3.59423	0.000949701	0.0452751	-1.04511	-4.47534	7.1288e-05	0.00162058
RP11-483E23.4	0.479341	2.06921	0.0456197	0.44458	0.819383	3.5936	0.00095138	0.0453046	0.829617	3.24403	0.00251331	0.016028
RASSF5	-0.368418	-2.36391	0.0234873	0.421277	-0.550898	-3.59124	0.000957779	0.0453565	-0.878111	-5.10371	1.04239e-05	0.000507595
LONRF2	0.332738	2.11742	0.0410607	0.443248	0.555468	3.59126	0.000957731	0.0453565	0.674869	3.89019	0.000405698	0.00483117
TRAJ6	-0.331217	-1.75154	0.0882022	0.46344	-0.668694	-3.59269	0.000953849	0.0453565	-0.63117	-3.02345	0.00453914	0.0232984
TCAF2P1	-0.254795	-1.01134	0.318472	0.611537	-0.890614	-3.59153	0.000956991	0.0453565	-0.569402	-2.04726	0.0478383	0.109291
AC073934.6	0.177095	0.817337	0.419008	0.681177	0.766029	3.5919	0.000955994	0.0453565	0.442468	1.8498	0.0724035	0.145189
ZNF704	0.411955	1.9264	0.0618216	0.455813	0.755419	3.58897	0.00096396	0.0453684	1.17968	4.997	1.44867e-05	0.000613887
PLAC8	-0.31948	-2.17109	0.0364618	0.436685	-0.519872	-3.58934	0.000962946	0.0453684	-0.808042	-4.97412	1.55446e-05	0.000638963
INAFM2	-0.238873	-1.30028	0.201608	0.527053	-0.648956	-3.58895	0.000964002	0.0453684	-0.979758	-4.83098	2.41312e-05	0.000838823
PAQR9-AS1	0.241889	1.34322	0.187445	0.517497	0.636116	3.5888	0.000964403	0.0453684	0.552151	2.77738	0.00857827	0.0352667
GFOD1	-0.459994	-3.58123	0.000985301	0.300832	-0.453822	-3.58963	0.000962154	0.0453684	-0.355685	-2.50838	0.0166773	0.0541028
RP5-1086K13.1	-0.210656	-1.45637	0.153789	0.497044	-0.511184	-3.59052	0.000959727	0.0453684	-0.371265	-2.32503	0.0257066	0.0715721
MMP7	-0.385939	-1.01871	0.315004	0.608811	-1.33808	-3.5884	0.000965521	0.045371	-2.18833	-5.23233	7.00347e-06	0.000415441
HIVEP1	-0.330098	-2.2325	0.031766	0.430927	-0.522143	-3.58775	0.00096729	0.0454042	-0.686815	-4.20762	0.00015923	0.00265891
SLC15A3	-0.397426	-1.65416	0.106619	0.475244	-0.848209	-3.58681	0.000969871	0.0454754	-1.61737	-6.09786	4.76523e-07	0.000159021
COPRS	-0.323403	-1.91231	0.0636614	0.455813	-0.596607	-3.58416	0.000977177	0.0455181	-1.11058	-5.94856	7.5761e-07	0.000184192
CSK	-0.273657	-1.74538	0.089282	0.464196	-0.553159	-3.58441	0.000976467	0.0455181	-0.978768	-5.65473	1.88823e-06	0.000242939
RBM38	-0.262022	-2.10348	0.0423354	0.443452	-0.439672	-3.58602	0.000972032	0.0455181	-0.711609	-5.17475	8.36941e-06	0.000457766
TBC1D10B	-0.297534	-2.25241	0.0303635	0.428972	-0.466127	-3.58509	0.000974601	0.0455181	-0.641699	-4.40039	8.93797e-05	0.00185596
OR10G3	1.22218	3.08751	0.00383031	0.338618	1.39656	3.5844	0.000976502	0.0455181	1.58356	3.62371	0.000873469	0.00796546
RPL17P17	0.695817	2.053	0.0472489	0.44684	1.19612	3.58552	0.000973422	0.0455181	0.99596	2.66185	0.0114608	0.0423649
RILP	-0.361682	-1.64466	0.108575	0.476117	-0.775578	-3.5831	0.000980109	0.045605	-1.28259	-5.28305	5.98552e-06	0.000392736
CLDN23	-0.56343	-2.25969	0.0298652	0.428777	-0.879071	-3.58192	0.000983388	0.0456977	-1.15321	-4.18952	0.000168044	0.0027568
CHKB	-0.426837	-2.70817	0.0102114	0.374672	-0.555623	-3.58161	0.000984241	0.0456977	-0.405446	-2.33021	0.0254004	0.0710342
MLF2	-0.335392	-2.56167	0.0146595	0.396258	-0.461486	-3.58107	0.000985764	0.0457187	-0.736243	-5.09377	1.0749e-05	0.000512769
MYO1E	-0.437127	-1.97942	0.0553025	0.449984	-0.778053	-3.57952	0.000990092	0.0458696	-1.1278	-4.62605	4.5132e-05	0.00121757
SLC44A2	-0.369141	-2.87114	0.00675124	0.363934	-0.452875	-3.57869	0.000992399	0.0459267	-0.633554	-4.46368	7.38445e-05	0.00165665
TP53	-0.203003	-1.30177	0.201102	0.526818	-0.549106	-3.57744	0.000995921	0.0459404	-1.11039	-6.44993	1.60118e-07	0.000109602
KB-51A8.1	0.728695	2.9826	0.00505384	0.350333	0.860388	3.57789	0.000994655	0.0459404	1.36637	5.06599	1.17111e-05	0.000545516
NDST1	-0.329438	-2.10688	0.0420215	0.443248	-0.550596	-3.57752	0.000995711	0.0459404	-0.809647	-4.69038	3.70974e-05	0.00107849
NEURL3	-0.469861	-2.04922	0.0476365	0.44684	-0.807202	-3.57672	0.000997965	0.045985	-0.760696	-3.00523	0.00476229	0.0239997
SLAMF7	-0.398866	-0.878737	0.385258	0.658729	-1.59721	-3.57501	0.0010028	0.0460282	-2.89231	-5.77199	1.31152e-06	0.000207107
TRIM38	-0.390539	-2.45235	0.0190697	0.408708	-0.560348	-3.57486	0.00100321	0.0460282	-0.870785	-4.95309	1.65837e-05	0.000655327
GLRX3	-0.261463	-1.714	0.0949587	0.467236	-0.536758	-3.5749	0.00100311	0.0460282	-0.803449	-4.77098	2.90001e-05	0.000931195
LINC01116	0.600966	2.94749	0.00553956	0.354301	0.717621	3.57587	0.00100037	0.0460282	0.551007	2.44798	0.0192691	0.0595961
INSIG1	-0.550544	-1.90572	0.0645388	0.455813	-1.01605	-3.57325	0.00100779	0.0460398	-1.7687	-5.54586	2.64833e-06	0.000278605
SNX20	-0.330681	-1.98825	0.0542778	0.44984	-0.584552	-3.57082	0.00101474	0.0460398	-0.98553	-5.36758	4.6058e-06	0.000348503
PSMA3	-0.372907	-1.82257	0.0765197	0.458986	-0.719807	-3.57424	0.00100498	0.0460398	-1.19075	-5.27174	6.19906e-06	0.000395075
WNT1	0.564164	3.38967	0.00168487	0.307213	0.585059	3.57137	0.00101316	0.0460398	0.881799	4.7992	2.65992e-05	0.000888338
DHFRP2	1.44626	4.25657	0.000137597	0.210792	1.19422	3.57092	0.00101446	0.0460398	1.45595	3.88156	0.000416019	0.00490891
RIOK3P1	0.36316	1.42017	0.163993	0.502769	0.899114	3.57224	0.00101068	0.0460398	1.01383	3.59132	0.000957546	0.00844804
NF1	-0.306189	-2.27967	0.0285334	0.425091	-0.472205	-3.57189	0.00101168	0.0460398	-0.516913	-3.48617	0.00128769	0.0102893
GCOM1	0.592154	2.99833	0.00484936	0.348592	0.694711	3.57382	0.00100618	0.0460398	0.706864	3.24211	0.00252642	0.0160758
HNRNPA1P43	1.30008	3.31184	0.0020882	0.320558	1.38075	3.57354	0.00100697	0.0460398	1.33275	3.07537	0.0039561	0.0213634
UBTFL1	1.29879	3.125	0.00346554	0.338062	1.46132	3.57223	0.00101071	0.0460398	1.23245	2.68613	0.0107893	0.0407447
SLC40A1	0.541511	1.93522	0.060693	0.454818	0.983413	3.57062	0.00101532	0.0460398	0.578833	1.8738	0.0689321	0.140479
PACSIN2	-0.441495	-2.79079	0.00829143	0.365913	-0.555691	-3.56877	0.00102065	0.0461605	-0.821465	-4.70368	3.56226e-05	0.00105157
FAM214B	-0.446266	-3.25083	0.00246722	0.324742	-0.482269	-3.56922	0.00101935	0.0461605	-0.676422	-4.4634	7.39085e-05	0.00165722
C15orf54	0.498301	2.05372	0.0471757	0.44684	0.852239	3.56857	0.00102123	0.0461605	0.945853	3.53118	0.0011348	0.00947443
RP11-39H3.1	0.54289	2.87354	0.00670964	0.363934	0.663451	3.56778	0.00102349	0.0462141	0.70922	3.40043	0.00163533	0.0120926
TMC4	0.400448	2.6611	0.0114822	0.385354	0.528211	3.5662	0.00102809	0.0463727	0.590223	3.55286	0.00106755	0.00908653
HELZ2	-0.556362	-1.86731	0.0698566	0.456803	-1.0454	-3.56473	0.00103236	0.0465161	-1.71601	-5.21707	7.34218e-06	0.000424503
MTRR	-0.271121	-2.06377	0.0461606	0.445558	-0.460816	-3.56376	0.00103518	0.046594	-0.607041	-4.18565	0.000169988	0.00277139
CYGB	0.106559	0.641033	0.525482	0.750325	0.582944	3.56289	0.00103774	0.0466111	0.947232	5.16174	8.71296e-06	0.000465218
TMCC3	-0.20869	-1.24289	0.221788	0.540995	-0.588843	-3.56297	0.0010375	0.0466111	-0.581144	-3.13516	0.00337244	0.0194118
STK40	-0.245669	-1.67559	0.102314	0.472152	-0.513762	-3.56011	0.00104592	0.0466365	-0.95542	-5.90281	8.73333e-07	0.000186173
RAB34	-0.326293	-1.77071	0.0849101	0.461788	-0.645645	-3.55973	0.00104704	0.0466365	-1.0675	-5.24754	6.68134e-06	0.000408288
COPS6	-0.228628	-1.72697	0.0925783	0.465633	-0.463877	-3.55994	0.00104643	0.0466365	-0.687841	-4.70643	3.53248e-05	0.00104567
RGS3	-0.185953	-1.54292	0.131425	0.485037	-0.422554	-3.5621	0.00104005	0.0466365	-0.559628	-4.20618	0.000159914	0.00266316
RP11-557F20.2	1.05775	3.39752	0.00164858	0.307213	1.09133	3.56139	0.00104215	0.0466365	1.43331	4.17028	0.000177935	0.0028584
FZD5	0.315801	2.57151	0.0143123	0.395692	0.430355	3.5603	0.00104536	0.0466365	0.50689	3.73884	0.000628571	0.00640118
BECN1P2	-0.0616677	-0.173355	0.863325	0.936485	1.24675	3.56075	0.00104402	0.0466365	1.02421	2.60805	0.0130884	0.0462615
KRTAP13-5P	0.559605	2.06476	0.0460616	0.445029	0.949827	3.56055	0.00104463	0.0466365	0.772463	2.58174	0.0139593	0.048234
OR7E28P	0.764488	2.74585	0.0092897	0.369421	0.975377	3.55928	0.00104838	0.0466474	0.670079	2.18011	0.0357355	0.0894406
RP11-5O17.1	0.652145	3.12008	0.00351145	0.338581	0.731956	3.55787	0.00105255	0.0467842	0.875842	3.79573	0.00053355	0.00579029
PSMB5	-0.359357	-2.09471	0.0431552	0.443591	-0.600482	-3.55616	0.00105764	0.0468641	-1.09814	-5.79834	1.20835e-06	0.000202546
EFTUD2	-0.222511	-1.55135	0.129394	0.4836	-0.502028	-3.55608	0.00105789	0.0468641	-0.783076	-4.94551	1.69752e-05	0.000662795
E2F3	-0.31083	-1.97945	0.0552995	0.449984	-0.549433	-3.55484	0.00106158	0.0468641	-0.807552	-4.65844	4.0893e-05	0.00114391
NFIL3	-0.246725	-1.86241	0.0705619	0.456827	-0.463646	-3.55575	0.00105887	0.0468641	-0.627032	-4.28745	0.00012546	0.00229215
YRDC	-0.389462	-2.04603	0.0479653	0.44684	-0.665927	-3.55433	0.00106312	0.0468641	-0.890489	-4.23763	0.000145599	0.00251182
RAPGEF2	-0.37144	-2.31824	0.026113	0.425091	-0.560586	-3.55465	0.00106217	0.0468641	-0.738951	-4.17766	0.000174074	0.00281543
ADAMTS1	0.50374	2.73661	0.00950823	0.369421	0.644043	3.55472	0.00106197	0.0468641	0.683862	3.36529	0.00180244	0.0128834
BNC2	0.310744	1.89459	0.0660428	0.455988	0.573834	3.55454	0.00106251	0.0468641	0.577206	3.1878	0.00292706	0.0177057
PSMD10P2	0.480804	2.02743	0.0499231	0.447062	0.829444	3.55344	0.0010658	0.0468854	0.927039	3.54098	0.0011039	0.00929335
RP11-14P20.1	1.00939	2.79104	0.00828597	0.365913	1.26496	3.55358	0.00106536	0.0468854	1.27533	3.19431	0.00287605	0.0175146
TGFBI	-0.423307	-2.19947	0.03422	0.43469	-0.672962	-3.55253	0.00106853	0.0468999	-1.90709	-8.97599	8.57386e-11	3.66233e-06
ZSWIM4	-0.278089	-1.70785	0.0961065	0.467253	-0.569313	-3.55223	0.00106943	0.0468999	-0.623715	-3.46977	0.00134816	0.0105979
TMEM86A	0.422422	2.45869	0.018784	0.407909	0.600797	3.55279	0.00106776	0.0468999	0.279711	1.47474	0.148806	0.243217
SLC26A11	-0.352442	-2.7977	0.00814698	0.365913	-0.440378	-3.55159	0.00107137	0.0469289	-0.555601	-3.99507	0.000298563	0.00399409
FAH	0.214794	1.50697	0.140374	0.489797	0.498219	3.55129	0.00107228	0.0469289	0.559564	3.55615	0.00105769	0.00903499
CDKN1A	-0.527513	-1.31302	0.197323	0.524328	-1.40357	-3.54941	0.00107798	0.0469359	-2.5384	-5.72329	1.52583e-06	0.000222315
IGHV1-69-2	-0.744118	-2.46796	0.0183734	0.405119	-1.05328	-3.54916	0.00107873	0.0469359	-1.89941	-5.70641	1.60806e-06	0.000225208
PLXDC2	-0.608512	-3.12497	0.00346578	0.338062	-0.680157	-3.5487	0.00108014	0.0469359	-0.991126	-4.61056	4.73099e-05	0.00125596
PAX1	0.503784	2.20795	0.0335744	0.433642	0.797211	3.54979	0.00107683	0.0469359	1.07425	4.2648	0.000134251	0.00238763
CTD-2197M16.1	0.458851	1.31437	0.196874	0.524201	1.22	3.55048	0.00107472	0.0469359	1.21637	3.15615	0.00318767	0.0187407
RP11-295K3.1	0.41256	2.44808	0.0192645	0.410032	0.588746	3.54936	0.00107814	0.0469359	0.432302	2.32366	0.0257881	0.0717007
CCL18	1.15529	4.33986	0.00010722	0.208002	0.929884	3.54894	0.00107942	0.0469359	0.00310477	0.0105648	0.991628	0.994062
NRP1	-0.511421	-2.41766	0.0207036	0.412325	-0.738471	-3.54678	0.00108601	0.0471433	-1.77757	-7.61188	4.62808e-09	5.16003e-05
CTC-378H22.1	-0.337094	-2.41772	0.0207006	0.412325	-0.48667	-3.54628	0.00108752	0.047161	-0.612524	-3.97947	0.000312541	0.00411028
RPL7P47	0.34091	1.26703	0.213123	0.535397	0.939055	3.54586	0.00108883	0.0471699	0.546504	1.83987	0.0738819	0.147307
CCR5	-0.423545	-1.32785	0.192425	0.520442	-1.1126	-3.5438	0.00109515	0.0473776	-2.12182	-6.02565	5.96277e-07	0.000176875
SRD5A1	-0.287565	-2.19383	0.034656	0.435008	-0.457185	-3.54358	0.00109585	0.0473776	-0.612519	-4.23286	0.000147689	0.00253341
RP11-351J23.2	0.427864	1.79092	0.081553	0.460291	0.833162	3.5431	0.00109734	0.0473943	0.547376	2.07541	0.0450093	0.104732
CPED1	-0.261366	-1.61628	0.114595	0.477867	-0.563731	-3.54179	0.0011014	0.0475009	-0.912191	-5.10976	1.02311e-05	0.000503021
DCLRE1B	-0.237166	-1.74006	0.0902255	0.464321	-0.47512	-3.54158	0.00110203	0.0475009	-0.766414	-5.09356	1.0756e-05	0.000512769
XAF1	-0.592387	-1.85745	0.0712816	0.457423	-1.11133	-3.54028	0.00110609	0.0475509	-1.87855	-5.33558	5.08631e-06	0.000366057
NCOA3	-0.431907	-2.6972	0.0104953	0.378578	-0.557916	-3.53978	0.00110765	0.0475509	-0.778358	-4.40302	8.86732e-05	0.00184708
SRPRA	-0.320889	-1.92603	0.0618699	0.455813	-0.58058	-3.54041	0.00110568	0.0475509	-0.768972	-4.18086	0.000172426	0.00279833
BTN2A1	-0.316572	-2.24263	0.0310455	0.429556	-0.491849	-3.53997	0.00110704	0.0475509	-0.61079	-3.91944	0.000372539	0.00458456
SMPD2	-0.154143	-1.02056	0.314142	0.608056	-0.52581	-3.53693	0.00111658	0.0478861	-0.71114	-4.26497	0.000134184	0.00238763
NXNP1	1.16719	3.74204	0.00062282	0.300832	1.08569	3.53636	0.00111835	0.0478972	1.2688	3.68476	0.000733954	0.00707535
OR5B1P	0.776597	2.62081	0.0126841	0.389854	1.03135	3.53613	0.00111908	0.0478972	0.993464	3.03696	0.00438001	0.0227922
CYLD	-0.406677	-2.08905	0.0436923	0.444361	-0.677233	-3.53444	0.00112445	0.0479179	-1.01372	-4.71699	3.4204e-05	0.00102663
MOB3B	-0.39012	-1.87138	0.0692755	0.456803	-0.725176	-3.53421	0.00112516	0.0479179	-1.08505	-4.7148	3.44328e-05	0.00102781
BOLA3	-0.215658	-1.45907	0.153047	0.496795	-0.51416	-3.53422	0.00112512	0.0479179	-0.762491	-4.67298	3.91196e-05	0.00111275
CA5BP1	-0.40927	-3.14087	0.00332125	0.333412	-0.45329	-3.53427	0.00112497	0.0479179	-0.637625	-4.43254	8.11243e-05	0.00175721
RN7SKP264	0.53605	1.77625	0.0839791	0.461395	1.04981	3.53421	0.00112517	0.0479179	0.969335	2.90951	0.00611428	0.0283373
DCTPP1	-0.328693	-1.6154	0.114785	0.477867	-0.707607	-3.53317	0.00112844	0.0480094	-1.15416	-5.13809	9.37365e-06	0.000482201
RP11-1094M14.8	-0.487445	-2.15136	0.0380962	0.440397	-0.787443	-3.53094	0.00113555	0.048188	-1.00158	-4.00424	0.000290633	0.00392921
RP11-810K23.6	0.945726	2.5149	0.0164174	0.400271	1.30687	3.5308	0.00113603	0.048188	1.5641	3.76763	0.000578606	0.00608149
RP11-553P9.3	0.311354	1.46023	0.152731	0.496795	0.741144	3.53144	0.00113396	0.048188	0.702632	2.98498	0.00502236	0.0248817
DOCK4	-0.342203	-1.60191	0.117745	0.478922	-0.742141	-3.52959	0.0011399	0.0482666	-1.45581	-6.17315	3.77252e-07	0.00014959
SLC15A2	-0.239401	-2.2486	0.0306279	0.429556	-0.369867	-3.52951	0.00114014	0.0482666	-0.281984	-2.39915	0.0216264	0.0641375
LINC01249	0.770121	3.38564	0.00170378	0.307213	0.790006	3.52855	0.00114324	0.0482857	1.0696	4.25944	0.000136421	0.00240794
CTD-2293H3.2	0.311764	1.74985	0.0884977	0.46344	0.618502	3.52696	0.00114837	0.0482857	0.79397	4.0367	0.000264166	0.0036972
MFSD4BP1	0.919131	2.94367	0.00559505	0.355211	1.08442	3.52852	0.00114331	0.0482857	1.1712	3.39774	0.00164758	0.0121506
RP11-82L7.4	0.867218	3.20286	0.00281031	0.328535	0.940315	3.52831	0.00114399	0.0482857	0.919809	3.07719	0.00393692	0.0213003
AC008060.7	0.374603	1.45346	0.154589	0.497543	0.894614	3.52656	0.00114963	0.0482857	0.831556	2.92261	0.00590994	0.0277746
AP000487.6	0.716716	2.60105	0.0133149	0.391969	0.956548	3.5269	0.00114856	0.0482857	0.853115	2.80451	0.008007	0.0337697
RNF19A	-0.558177	-3.26225	0.00239157	0.324742	-0.593922	-3.52663	0.00114943	0.0482857	-0.448818	-2.3761	0.0228279	0.0663555
IDH1	0.449088	2.16896	0.0366351	0.437236	0.718934	3.52772	0.00114591	0.0482857	0.139907	0.612081	0.544256	0.637592
RP11-680A11.5	-0.744624	-3.60223	0.000928388	0.300832	-0.717158	-3.52479	0.00115537	0.0484791	-0.79836	-3.4985	0.00124395	0.010073
HTR1B	0.572669	2.53825	0.0155168	0.399725	0.782656	3.52441	0.00115663	0.0484844	0.749012	3.00724	0.00473714	0.0239322
LCN10	0.36971	2.01541	0.0512254	0.448873	0.636285	3.52401	0.00115792	0.0484908	0.805489	3.97749	0.000314368	0.00412981
PRKD2	-0.265123	-1.76376	0.086092	0.462239	-0.521297	-3.52339	0.00115994	0.0485278	-0.787249	-4.74408	3.14869e-05	0.000982175
TCN2	0.489509	1.8623	0.0705771	0.456827	0.911467	3.52302	0.00116117	0.0485315	0.996982	3.43578	0.00148232	0.0113107
PHF19	-0.267006	-2.33426	0.0251635	0.425091	-0.396561	-3.52226	0.00116363	0.0485394	-0.54706	-4.33222	0.000109707	0.00210708
PACRG	0.496779	2.89129	0.00640945	0.360711	0.59571	3.52246	0.00116297	0.0485394	0.732917	3.86394	0.000437883	0.00507745
AKAP2	-0.350318	-1.79345	0.0811401	0.460282	-0.67688	-3.52065	0.00116893	0.0487129	-0.989119	-4.58694	5.08306e-05	0.00130683
C1QL1	0.669396	2.30898	0.0266769	0.425091	1.0045	3.52021	0.00117036	0.0487252	0.635016	1.98412	0.0547544	0.120005
DNAJB6	-0.367261	-2.20545	0.0337636	0.434392	-0.576798	-3.51909	0.00117407	0.0487845	-0.892642	-4.85565	2.23729e-05	0.000797712
AMOTL2	0.697468	3.65713	0.000794216	0.300832	0.660628	3.5193	0.00117335	0.0487845	0.817331	3.88206	0.00041542	0.00490591
GOLGA2	-0.308673	-2.65087	0.011777	0.385769	-0.403258	-3.51849	0.00117604	0.0488189	-0.69429	-5.40104	4.15174e-06	0.00032902
CETP	-0.277168	-1.71656	0.0944862	0.467236	-0.559076	-3.51778	0.00117838	0.0488683	-0.76455	-4.28912	0.000124834	0.00229049
CBL	-0.289969	-1.93688	0.0604833	0.454752	-0.518226	-3.51685	0.00118146	0.0489486	-0.629339	-3.80788	0.00051514	0.0056566
SPINK1	-0.765231	-2.25772	0.0299992	0.428938	-1.17273	-3.51527	0.00118674	0.0491198	-0.933337	-2.49439	0.0172476	0.0552936
CD40	-0.350062	-0.979886	0.333555	0.621441	-1.23575	-3.51435	0.00118981	0.0491514	-2.31624	-5.87302	9.58065e-07	0.000186173
RP11-30P21.2	0.657859	2.43125	0.0200488	0.411189	0.936065	3.51469	0.00118867	0.0491514	1.28307	4.29531	0.000122539	0.00226004
FERMT3	-0.353306	-1.67437	0.102556	0.472529	-0.729548	-3.51268	0.0011954	0.0492395	-1.39149	-5.9735	7.01126e-07	0.000183734
RPS3AP37	1.4941	4.20333	0.000161275	0.210792	1.22914	3.51316	0.00119379	0.0492395	1.04365	2.65959	0.0115251	0.0425002
LIN28AP1	0.897796	2.45944	0.0187505	0.407909	1.26223	3.51301	0.00119428	0.0492395	0.931529	2.31155	0.0265193	0.0730581
CAMK1	-0.529673	-2.24503	0.0308769	0.429556	-0.815373	-3.51119	0.00120041	0.0492609	-1.71256	-6.57519	1.0877e-07	0.000109602
APOL3	-0.338063	-1.19496	0.239763	0.553543	-0.97776	-3.51133	0.00119992	0.0492609	-1.80483	-5.77882	1.28396e-06	0.000206181
CTD-2609K8.3	0.558788	2.36303	0.0235356	0.421277	0.817072	3.51047	0.00120284	0.0492609	1.1425	4.37648	9.60466e-05	0.00194479
RP11-168O16.2	0.465487	2.04648	0.0479188	0.44684	0.786009	3.51084	0.00120159	0.0492609	1.09468	4.35946	0.000101089	0.00201341
RP11-4G2.1	0.780373	2.46713	0.0184101	0.405146	1.09325	3.5115	0.00119937	0.0492609	1.13353	3.24617	0.00249869	0.015961
RP11-159M11.2	0.565046	2.15833	0.0375118	0.439139	0.90459	3.51051	0.00120271	0.0492609	0.817906	2.82999	0.00750304	0.0324057
SLC25A40	-0.41614	-2.21758	0.0328544	0.430927	-0.64813	-3.50902	0.00120774	0.0493517	-1.01335	-4.89155	2.00377e-05	0.000735023
MAST3	-0.216331	-1.80989	0.0785032	0.459234	-0.412826	-3.50902	0.00120776	0.0493517	-0.588835	-4.46247	7.41156e-05	0.00165838
GS1-39E22.1	1.14542	3.16333	0.00312666	0.328535	1.25053	3.50879	0.00120852	0.0493517	1.20669	3.01872	0.00459601	0.0234662
APBA1	0.411011	3.00633	0.00474846	0.348216	0.472073	3.50813	0.00121076	0.0493961	0.437012	2.8955	0.00633995	0.0290196
UBE2J1	-0.364405	-1.70441	0.0967541	0.467993	-0.737947	-3.5067	0.00121565	0.0495482	-1.22861	-5.20538	7.61263e-06	0.000432797
XKRX	0.371096	1.04201	0.304218	0.60067	1.22839	3.50436	0.00122364	0.0498261	1.96672	5.00238	1.42486e-05	0.000606809
TAPBP	-0.321203	-1.50725	0.140302	0.489709	-0.73493	-3.50377	0.00122566	0.0498612	-1.43744	-6.11005	4.5883e-07	0.000157953
SRRT	-0.24114	-1.6858	0.100314	0.471051	-0.493108	-3.50239	0.00123045	0.0499236	-0.792376	-5.01784	1.35857e-05	0.000593368
CARD11	-0.326161	-2.31547	0.0262803	0.425091	-0.485582	-3.50231	0.0012307	0.0499236	-0.712084	-4.57917	5.20444e-05	0.00132249
TET1	0.222983	2.05021	0.0475342	0.44684	0.374929	3.50235	0.00123058	0.0499236	0.296282	2.46763	0.0183882	0.05772
CMAS	-0.409261	-2.29873	0.0273132	0.425091	-0.613587	-3.50145	0.00123367	0.0499491	-0.922144	-4.69175	3.69433e-05	0.00107601
AC093698.4	0.794365	2.81224	0.00785093	0.365913	0.973517	3.50155	0.00123336	0.0499491	0.753218	2.41546	0.0208112	0.0626124
PITPNB	-0.30697	-1.86545	0.0701235	0.456803	-0.567064	-3.5011	0.00123491	0.049952	-0.675794	-3.72006	0.00066339	0.00663468
FLT3	0.216566	0.969167	0.338803	0.624782	0.769818	3.50009	0.0012384	0.0500458	1.35254	5.48282	3.22105e-06	0.000295529
GTPBP1	-0.365064	-2.47636	0.0180084	0.40358	-0.507553	-3.49793	0.00124594	0.0501154	-0.76698	-4.71278	3.46466e-05	0.00103119
PPP6R1	-0.275755	-2.03629	0.048982	0.447062	-0.466239	-3.49791	0.00124599	0.0501154	-0.67395	-4.50808	6.45654e-05	0.00152624
GUCY2D	0.375237	1.95463	0.0582723	0.452465	0.661	3.4982	0.00124499	0.0501154	0.834054	3.93551	0.000355462	0.00446575
LMOD1	0.548885	2.76865	0.00877002	0.365913	0.682567	3.49796	0.00124582	0.0501154	0.850113	3.88428	0.000412743	0.00488072
BRD4	-0.267183	-2.28978	0.0278807	0.425091	-0.401859	-3.49897	0.00124229	0.0501154	-0.417245	-3.23909	0.0025473	0.0161556
CLEC7A	-0.423437	-1.32211	0.19431	0.521863	-1.102	-3.49575	0.00125356	0.0502675	-2.07606	-5.8717	9.62004e-07	0.000186173
RP11-266K4.14	0.494737	2.7815	0.00848916	0.365913	0.611787	3.49453	0.00125787	0.0502675	0.899722	4.58206	5.15905e-05	0.00131563
SUPT4H1	-0.351398	-2.27964	0.0285354	0.425091	-0.530398	-3.49586	0.0012532	0.0502675	-0.772783	-4.54122	5.83977e-05	0.00142703
C19orf71	-0.668626	-2.50548	0.0167939	0.400271	-0.917893	-3.49449	0.00125801	0.0502675	-1.1278	-3.82815	0.00048579	0.00544205
ARL4D	0.408983	3.1147	0.00356232	0.338618	0.451707	3.49503	0.0012561	0.0502675	0.508685	3.50919	0.00120716	0.0098639
RPL3P9	0.174477	0.793917	0.432345	0.688961	0.756085	3.49535	0.00125497	0.0502675	0.573919	2.36556	0.0233966	0.0674168
RP11-350D17.3	0.164976	0.800441	0.428604	0.686652	0.709303	3.49643	0.00125116	0.0502675	0.381838	1.67817	0.101806	0.18497
TRIM69	-0.31982	-1.60659	0.11671	0.478727	-0.684539	-3.49367	0.00126089	0.0503354	-1.30842	-5.9538	7.45369e-07	0.000184037
CLEC4A	-0.394792	-1.1909	0.241335	0.554397	-1.13869	-3.48977	0.00127477	0.0503889	-2.37308	-6.48437	1.43957e-07	0.000109602
NUP62	-0.239702	-1.34639	0.18643	0.516922	-0.611626	-3.49034	0.00127273	0.0503889	-1.08308	-5.51067	2.95422e-06	0.000289425
CTNND1	-0.321339	-1.77953	0.083431	0.460838	-0.620283	-3.48992	0.00127421	0.0503889	-1.0754	-5.39462	4.23524e-06	0.000330558
KPNB1	-0.39577	-2.23143	0.0318426	0.430927	-0.609385	-3.49074	0.00127131	0.0503889	-1.04359	-5.32989	5.17689e-06	0.000367138
MINOS1	-0.236878	-1.78067	0.0832422	0.460679	-0.45692	-3.48965	0.0012752	0.0503889	-0.778303	-5.29973	5.68414e-06	0.0003828
NUB1	-0.437798	-2.30769	0.0267559	0.425091	-0.651894	-3.49112	0.00126995	0.0503889	-1.07012	-5.10957	1.02371e-05	0.000503021
RP11-77K12.9	0.310194	1.96632	0.0568561	0.450681	0.542137	3.4915	0.0012686	0.0503889	0.641777	3.68511	0.000733227	0.00707241
MAP1LC3BP1	0.975674	3.04074	0.00433649	0.342022	1.10216	3.48982	0.00127457	0.0503889	1.0858	3.0653	0.00406332	0.0217363
FAM163B	0.642672	2.53407	0.0156746	0.399725	0.871744	3.49223	0.001266	0.0503889	0.76727	2.74047	0.00941622	0.037455
PDGFC	0.555419	2.49716	0.0171332	0.400271	0.764552	3.49234	0.00126562	0.0503889	0.610675	2.48704	0.017554	0.0559275
RP11-37B2.1	-0.152051	-1.31643	0.196188	0.523728	-0.397067	-3.49266	0.00126447	0.0503889	-0.0127014	-0.0996109	0.921195	0.942442
ABCD1	-0.523124	-3.16898	0.00307953	0.328535	-0.566862	-3.48879	0.00127827	0.050437	-1.0025	-5.50105	3.04377e-06	0.000290211
EDEM1	-0.356074	-1.81656	0.0774549	0.458986	-0.673076	-3.48865	0.00127878	0.050437	-1.0236	-4.7303	3.28409e-05	0.00100072
PSMD14	-0.350448	-1.90578	0.0645311	0.455813	-0.631303	-3.48795	0.00128128	0.0504422	-1.19688	-5.89584	8.9247e-07	0.000186173
ZFAT	-0.19239	-1.85131	0.0721807	0.457884	-0.356784	-3.48807	0.00128085	0.0504422	-0.387518	-3.37781	0.0017411	0.0125946
LTV1	-0.352373	-2.1626	0.0371576	0.438342	-0.559335	-3.48762	0.00128247	0.0504425	-0.754333	-4.19357	0.000166031	0.00273506
SLCO3A1	-0.137895	-1.05161	0.29985	0.597642	-0.45007	-3.48716	0.00128412	0.0504612	-0.386518	-2.67009	0.0112288	0.041862
GBP2	-0.446801	-1.74467	0.0894087	0.464253	-0.878754	-3.48618	0.00128765	0.050507	-1.63826	-5.79467	1.22223e-06	0.000203143
MIDN	-0.270716	-1.73451	0.0912156	0.465029	-0.535569	-3.48629	0.00128726	0.050507	-0.755555	-4.38509	9.3593e-05	0.00191284
ACOX1	-0.324304	-1.77729	0.083804	0.460899	-0.626012	-3.48557	0.00128985	0.0505469	-1.04758	-5.20048	7.72914e-06	0.000434408
TFRC	-0.523282	-1.53376	0.133659	0.486014	-1.16977	-3.48343	0.00129759	0.0506823	-2.07119	-5.49908	3.06241e-06	0.000290691
CYP2T3P	0.618722	2.55284	0.0149774	0.398091	0.830973	3.48337	0.00129783	0.0506823	1.08603	4.05899	0.000247372	0.00354106
RAB42	0.573182	2.75242	0.00913691	0.368043	0.713978	3.48331	0.00129805	0.0506823	0.315864	1.37395	0.177787	0.277156
RPS27P16	-0.30868	-1.20603	0.235521	0.550562	-0.87776	-3.48424	0.00129467	0.0506823	-0.180969	-0.64047	0.525844	0.621339
RIBC2	0.367134	1.82863	0.0755861	0.458984	0.688236	3.48276	0.00130003	0.0507132	0.395027	1.78229	0.0829731	0.159656
SMCO4	-0.480744	-1.67005	0.103414	0.473149	-0.986391	-3.48136	0.00130515	0.0508664	-1.97635	-6.21911	3.27148e-07	0.000142593
PLIN3	-0.356393	-1.95461	0.0582754	0.452465	-0.623714	-3.47536	0.00132725	0.0508919	-1.33881	-6.65116	8.60699e-08	0.000109602
SDC2	-0.597001	-1.81813	0.0772102	0.458986	-1.12339	-3.47585	0.00132542	0.0508919	-2.16165	-5.96323	7.23859e-07	0.000184037
FPR3	-0.476861	-1.96281	0.0572783	0.450908	-0.831395	-3.47678	0.00132199	0.0508919	-1.59328	-5.94054	7.76723e-07	0.000184321
ARAP1	-0.303712	-1.73964	0.0903	0.464321	-0.597563	-3.47747	0.00131942	0.0508919	-1.12281	-5.82575	1.10967e-06	0.0001957
ACO2	-0.300069	-1.81305	0.0780047	0.459204	-0.56626	-3.47607	0.0013246	0.0508919	-0.934713	-5.11582	1.00414e-05	0.000498163
MRPL12	-0.442023	-1.90165	0.0650856	0.455988	-0.795385	-3.47653	0.0013229	0.0508919	-1.26692	-4.93721	1.74143e-05	0.00067317
UBE2Z	-0.334692	-1.79552	0.0808045	0.460175	-0.637753	-3.476	0.00132485	0.0508919	-1.01472	-4.93102	1.77488e-05	0.000679945
WDR55	-0.244655	-1.87858	0.0682595	0.456803	-0.445617	-3.47633	0.00132365	0.0508919	-0.678537	-4.7195	3.39423e-05	0.00102203
SMG5	-0.338747	-2.27834	0.0286203	0.425091	-0.508812	-3.47685	0.00132174	0.0508919	-0.759922	-4.62978	4.46218e-05	0.0012094
RP4-530I15.6	0.667375	3.03966	0.0043489	0.342022	0.752016	3.47989	0.00131051	0.0508919	1.09871	4.53299	5.98729e-05	0.00145393
SLC45A3	-0.248727	-1.14701	0.258795	0.56703	-0.741827	-3.47561	0.00132631	0.0508919	-1.06239	-4.4379	7.98221e-05	0.0017353
AMBRA1	-0.272129	-2.39242	0.0219714	0.416969	-0.389554	-3.47947	0.00131207	0.0508919	-0.547618	-4.361	0.000100622	0.00200657
ATXN1	-0.340222	-2.29462	0.0275722	0.425091	-0.507909	-3.48031	0.00130898	0.0508919	-0.664588	-4.06021	0.000246483	0.00352951
LOC401913	0.535324	2.4202	0.0205797	0.412325	0.757085	3.47747	0.00131943	0.0508919	0.806989	3.30484	0.00212866	0.0143961
CLUHP3	-0.274966	-2.1138	0.0413885	0.443248	-0.445284	-3.4778	0.00131823	0.0508919	-0.469268	-3.26778	0.00235581	0.0153843
NXF1	-0.26753	-2.32645	0.0256225	0.425091	-0.393946	-3.4805	0.00130828	0.0508919	-0.39042	-3.07539	0.00395581	0.0213634
CLCF1	-0.326832	-1.59807	0.118597	0.479405	-0.700207	-3.47843	0.00131591	0.0508919	-0.601489	-2.66408	0.0113974	0.0422276
CTD-2506P8.6	0.56297	3.39237	0.0016723	0.307213	0.56836	3.47957	0.00131171	0.0508919	0.436213	2.38103	0.0225659	0.0658928
AC007919.18	-0.640797	-2.50148	0.0169561	0.400271	-0.876016	-3.47435	0.00133101	0.05099	-1.10125	-3.89413	0.000401068	0.00480611
RP4-676J13.2	0.305901	1.6236	0.113017	0.477215	0.6442	3.47378	0.00133312	0.0510254	0.516714	2.48425	0.0176717	0.0562101
YIPF6	-0.341252	-2.08783	0.0438086	0.44439	-0.558728	-3.47298	0.0013361	0.051048	-0.821183	-4.55099	5.66924e-05	0.00139978
RPEP6	1.10981	2.7628	0.00890072	0.366097	1.37324	3.47319	0.00133532	0.051048	1.12607	2.53928	0.0154781	0.0514792
RBCK1	-0.332618	-2.26323	0.0296248	0.428777	-0.502095	-3.47099	0.00134357	0.0510888	-0.980227	-6.04168	5.67323e-07	0.000170656
GBP4	-0.476236	-1.35249	0.184489	0.51562	-1.20291	-3.47078	0.00134435	0.0510888	-2.3489	-6.04261	5.65693e-07	0.000170656
MRPL54	-0.364503	-1.88381	0.0675284	0.456791	-0.661012	-3.47079	0.00134432	0.0510888	-1.26089	-5.90283	8.73281e-07	0.000186173
VASP	-0.360906	-1.77791	0.0837003	0.460899	-0.693591	-3.47139	0.00134205	0.0510888	-1.28471	-5.73283	1.48126e-06	0.000220891
SLC25A11	-0.29666	-1.72506	0.0929257	0.466074	-0.587658	-3.47179	0.00134057	0.0510888	-1.03889	-5.47221	3.32894e-06	0.000300012
TSPAN17	-0.436841	-2.29634	0.0274636	0.425091	-0.65008	-3.47188	0.00134024	0.0510888	-0.911283	-4.33925	0.000107417	0.00208446
PDLIM4	-0.750593	-2.61715	0.012799	0.390786	-0.979584	-3.47015	0.00134672	0.0511333	-0.793173	-2.50518	0.0168062	0.0543516
ITGB1BP1	-0.365789	-2.17169	0.0364132	0.436685	-0.575156	-3.46927	0.00135006	0.0512147	-0.818202	-4.40024	8.94199e-05	0.00185596
NOP16	-0.138505	-1.21937	0.230479	0.54736	-0.387768	-3.46838	0.00135341	0.0512507	-0.561196	-4.47541	7.12728e-05	0.00162058
SDHCP2	1.35291	3.69916	0.000704346	0.300832	1.24856	3.46838	0.0013534	0.0512507	1.63095	4.03945	0.000262036	0.00367372
TAF13	-0.434123	-1.83613	0.0744458	0.458876	-0.80692	-3.4674	0.00135711	0.0512544	-1.27172	-4.87223	2.12624e-05	0.000770334
TYK2	-0.297731	-2.00265	0.0526406	0.449167	-0.507447	-3.4678	0.00135561	0.0512544	-0.790842	-4.81855	2.50681e-05	0.000854575
RP11-1134I14.8	0.740849	3.19798	0.0028477	0.328535	0.790649	3.46747	0.00135684	0.0512544	1.17594	4.59811	4.91343e-05	0.00127896
EOMES	-0.345101	-1.74822	0.0887837	0.463655	-0.673629	-3.467	0.00135866	0.0512677	-0.817879	-3.75306	0.000603384	0.00624057
NAPA	-0.29261	-2.11312	0.0414502	0.443248	-0.472424	-3.46617	0.00136181	0.0512938	-0.924028	-6.04458	5.62234e-07	0.000170656
PIM3	-0.471495	-1.60797	0.116408	0.478727	-1.00022	-3.4656	0.00136396	0.0512938	-1.63181	-5.041	1.26494e-05	0.000568757
IL18RAP	-0.269326	-1.71689	0.0944245	0.467236	-0.535087	-3.46555	0.00136415	0.0512938	-0.859473	-4.963	1.60858e-05	0.000644851
RP11-326A13.1	0.258081	0.923781	0.361631	0.641703	0.953194	3.46639	0.00136095	0.0512938	0.65909	2.137	0.0393263	0.095602
NPLOC4	-0.290893	-2.04653	0.0479135	0.44684	-0.484725	-3.46469	0.00136744	0.0513193	-0.738601	-4.70699	3.52646e-05	0.00104474
EDN3	0.294808	1.58967	0.120483	0.48052	0.632394	3.46449	0.00136819	0.0513193	0.86804	4.2399	0.000144618	0.00250096
CTD-3023L14.3	1.50277	3.41451	0.00157265	0.307213	1.50076	3.46443	0.00136844	0.0513193	1.43484	2.95316	0.00545823	0.0263207
SSH1	-0.251527	-1.91842	0.0628588	0.455813	-0.446859	-3.46267	0.00137517	0.0515267	-0.597487	-4.12794	0.000201757	0.00310337
DBI	-0.304071	-1.48299	0.14661	0.491685	-0.698431	-3.46075	0.00138258	0.0516298	-1.242	-5.48697	3.17981e-06	0.000294633
IL1RAP	-0.367697	-2.77114	0.00871495	0.365913	-0.452067	-3.46142	0.00137998	0.0516298	-0.587282	-4.00924	0.000286395	0.00388978
TRBV12-2	0.86587	2.69058	0.0106702	0.379177	1.09619	3.4607	0.00138276	0.0516298	1.38588	3.90093	0.000393204	0.00474792
RP11-309H21.3	0.367289	1.63794	0.109977	0.476197	0.763868	3.46092	0.0013819	0.0516298	0.588012	2.37533	0.0228688	0.0664383
TMIE	0.411572	2.40711	0.0212254	0.41497	0.582327	3.46019	0.00138475	0.0516548	0.688757	3.64891	0.000813044	0.00756627
XKR3	0.763525	3.09755	0.00372922	0.338618	0.839431	3.4599	0.00138584	0.0516548	0.88451	3.25046	0.00246966	0.0158545
MIR206	1.31943	2.42603	0.020298	0.412325	1.85194	3.45955	0.00138721	0.0516607	1.54576	2.57454	0.0142071	0.0487199
ALDOA	-0.327138	-2.02674	0.0499972	0.447062	-0.549099	-3.45622	0.00140019	0.0516748	-1.05056	-5.89569	8.92878e-07	0.000186173
ADAR	-0.356359	-1.87066	0.0693787	0.456803	-0.648019	-3.45603	0.0014009	0.0516748	-1.13193	-5.38237	4.3993e-06	0.000337978
RMDN3	-0.266471	-2.02207	0.0505003	0.448631	-0.448484	-3.45762	0.00139472	0.0516748	-0.678536	-4.66409	4.01949e-05	0.00113104
WHAMM	-0.332934	-2.31905	0.0260642	0.425091	-0.488393	-3.45625	0.00140006	0.0516748	-0.691616	-4.3638	9.9781e-05	0.00199819
RP11-83N9.6	0.338609	1.83717	0.074289	0.458694	0.627154	3.45707	0.00139686	0.0516748	0.879693	4.32343	0.000112637	0.00214216
AHCYP7	0.468179	2.54001	0.0154508	0.399725	0.627348	3.45793	0.00139351	0.0516748	0.755602	3.71333	0.000676312	0.00672142
TACO1	-0.14508	-1.0396	0.305323	0.601633	-0.474953	-3.45775	0.00139421	0.0516748	-0.552044	-3.58328	0.000979619	0.00858747
RP11-178L8.6	0.867086	2.28391	0.0282581	0.425091	1.29152	3.45623	0.00140015	0.0516748	1.24851	2.97891	0.00510295	0.0251584
SSX9	1.30039	3.53146	0.0011339	0.300832	1.25289	3.45684	0.00139775	0.0516748	1.08712	2.67428	0.0111124	0.0415753
RP11-401L13.7	0.886334	3.90758	0.000385659	0.280409	0.771702	3.45656	0.00139886	0.0516748	0.625523	2.49805	0.0170965	0.0549784
RP11-359P18.7	0.437451	1.12976	0.265905	0.571997	1.31721	3.45616	0.00140041	0.0516748	0.718356	1.68051	0.101346	0.18437
HSPH1	-0.363949	-1.85456	0.0717037	0.457641	-0.6674	-3.45517	0.00140427	0.0517099	-0.980113	-4.52401	6.15249e-05	0.00147975
NPAP1P2	0.72789	2.87136	0.00674747	0.363934	0.86215	3.45532	0.0014037	0.0517099	1.16225	4.15307	0.000187267	0.00295308
TUBB8P11	0.775184	2.99631	0.0048752	0.348592	0.879685	3.45457	0.00140666	0.0517531	1.26824	4.4405	7.91988e-05	0.00173087
RP11-652G5.1	0.983852	3.49813	0.00124523	0.300832	0.95617	3.45402	0.00140878	0.0517868	1.39534	4.49401	6.73752e-05	0.0015607
GLA	-0.492447	-2.02452	0.0502358	0.447886	-0.826777	-3.45331	0.00141161	0.0518368	-1.57632	-5.87024	9.66367e-07	0.000186173
AC016738.4	0.44087	2.00399	0.0524901	0.449167	0.747515	3.45214	0.00141621	0.0518368	0.857027	3.5288	0.00114243	0.00951248
RP4-597A16.2	0.699974	2.18741	0.0351572	0.43571	1.08736	3.45228	0.00141566	0.0518368	0.953269	2.69843	0.0104631	0.0399975
CYP4F34P	0.517338	1.98218	0.0549806	0.449984	0.886916	3.45251	0.00141476	0.0518368	0.7384	2.56276	0.0146206	0.0496437
RP5-1050D4.5	-0.268423	-1.52391	0.136098	0.487554	-0.598581	-3.45259	0.00141442	0.0518368	-0.0525198	-0.270091	0.788603	0.840129
MMP28	0.434268	1.8293	0.0754838	0.458879	0.806352	3.45093	0.00142101	0.051968	1.21405	4.63244	4.42617e-05	0.0012058
AIFM2	-0.271892	-1.97987	0.0552507	0.449984	-0.466239	-3.4493	0.00142746	0.0520255	-0.5807	-3.83035	0.000482704	0.00542455
OR11H13P	0.71777	2.95182	0.0054773	0.353419	0.825582	3.44944	0.00142691	0.0520255	0.859402	3.20147	0.00282094	0.0172979
FAM24A	1.36118	3.48125	0.00130554	0.301693	1.32774	3.45	0.0014247	0.0520255	0.9018	2.0892	0.043678	0.102635
RP11-146P2.1	0.436928	1.30558	0.199817	0.525895	1.1363	3.44962	0.00142621	0.0520255	0.413784	1.11999	0.269989	0.376956
CX3CR1	-0.425622	-1.7794	0.083452	0.460838	-0.811593	-3.44725	0.00143567	0.0521835	-1.62908	-6.16935	3.81723e-07	0.00014959
LFNG	-0.297385	-2.14648	0.0385104	0.440514	-0.470059	-3.44702	0.00143659	0.0521835	-0.882542	-5.7702	1.31881e-06	0.000207107
2020-09-11	-0.215238	-1.29947	0.201881	0.527053	-0.561965	-3.447	0.00143668	0.0521835	-0.81153	-4.43813	7.97677e-05	0.0017353
RP11-481J8.3	0.519594	2.67642	0.0110535	0.381128	0.658787	3.44761	0.00143422	0.0521835	0.890662	4.15575	0.000185781	0.00293694
SQRDL	-0.416618	-1.58266	0.122075	0.480726	-0.891726	-3.44163	0.00145832	0.0521948	-1.7156	-5.90356	8.71302e-07	0.000186173
IRF7	-0.580444	-2.01753	0.0509936	0.448873	-0.97583	-3.44602	0.0014406	0.0521948	-1.74629	-5.49825	3.07034e-06	0.000290797
MSMO1	-0.512221	-2.1488	0.0383132	0.440514	-0.80766	-3.44232	0.00145553	0.0521948	-1.34553	-5.11306	1.01272e-05	0.000499985
NPTN	-0.394746	-2.25602	0.0301151	0.428938	-0.592802	-3.44207	0.00145657	0.0521948	-0.957079	-4.95474	1.64997e-05	0.000654396
KLF6	-0.302175	-1.65661	0.106121	0.475244	-0.618444	-3.44465	0.00144612	0.0521948	-0.91862	-4.56188	5.48495e-05	0.00136866
LRRC8B	-0.456388	-2.4029	0.0214367	0.415566	-0.643332	-3.44128	0.00145978	0.0521948	-0.916911	-4.37296	9.707e-05	0.00196045
SH3BP2	-0.319543	-2.22457	0.0323405	0.430927	-0.486717	-3.44252	0.00145472	0.0521948	-0.664224	-4.1887	0.000168455	0.00276009
RP11-13A1.1	-0.392599	-2.37069	0.0231184	0.419875	-0.561101	-3.44231	0.00145556	0.0521948	-0.763835	-4.17804	0.000173879	0.00281442
CCL3L3	-0.493997	-1.20814	0.234715	0.550014	-1.38566	-3.44298	0.00145287	0.0521948	-1.88545	-4.17693	0.000174453	0.0028205
FBRS	-0.372395	-2.75764	0.00901751	0.366097	-0.458025	-3.44593	0.00144097	0.0521948	-0.56103	-3.76328	0.000585895	0.00612345
RP11-121A8.1	-0.316959	-1.57937	0.122828	0.481095	-0.680298	-3.44401	0.0014487	0.0521948	-0.823383	-3.71647	0.000670256	0.00668396
RP11-648K4.2	0.816578	2.74142	0.00939393	0.369421	1.01004	3.44509	0.00144434	0.0521948	1.15351	3.50789	0.00121158	0.00989346
CTD-3023L14.2	0.376733	1.75347	0.0878666	0.46344	0.72836	3.44425	0.00144774	0.0521948	0.803536	3.38779	0.00169365	0.0123708
SYT13	0.33309	1.77977	0.0833911	0.460838	0.633894	3.44114	0.00146033	0.0521948	0.663624	3.21197	0.00274184	0.0169869
HCG14	0.300071	1.30266	0.200803	0.52657	0.780527	3.44252	0.00145471	0.0521948	0.791943	3.1142	0.00356707	0.0200858
FAM83G	-0.292509	-1.93042	0.0613053	0.455577	-0.513358	-3.44204	0.00145665	0.0521948	-0.475464	-2.84235	0.00726946	0.0317435
RP11-359P18.1	0.548417	1.82619	0.075961	0.458986	1.01707	3.44087	0.00146143	0.0521948	0.700462	2.11285	0.0414749	0.0991432
ZBED2	-0.272452	-1.4574	0.153505	0.496965	-0.6339	-3.44505	0.00144451	0.0521948	-0.374515	-1.81471	0.0777446	0.152585
RP11-173P15.9	0.213776	1.00673	0.320655	0.612777	0.719524	3.44256	0.00145455	0.0521948	0.422464	1.80215	0.0797363	0.155203
LINC01480	0.308292	1.91873	0.0628182	0.455813	0.544792	3.44481	0.00144547	0.0521948	0.258796	1.459	0.153067	0.248471
PCK2	-0.250492	-1.23993	0.222866	0.541662	-0.683986	-3.43982	0.00146571	0.052304	-1.20115	-5.38578	4.353e-06	0.000335629
TMPRSS11BNL	0.47428	2.47205	0.0181949	0.404578	0.649222	3.43796	0.00147334	0.0525322	0.716084	3.38092	0.00172617	0.0125227
RP11-384G23.1	0.753137	2.97484	0.00515761	0.35047	0.856433	3.43689	0.00147771	0.052644	1.11351	3.98411	0.00030832	0.0040761
NPC1	-0.368174	-2.51978	0.0162253	0.400271	-0.494113	-3.43574	0.00148248	0.0527567	-0.621974	-3.85593	0.00044819	0.00515467
MTND6P14	0.683469	1.85439	0.0717275	0.457641	1.24631	3.43553	0.00148334	0.0527567	0.74155	1.82251	0.0765283	0.15087
FRG1	-0.414035	-2.24457	0.0309092	0.429556	-0.623685	-3.43515	0.00148491	0.0527686	-0.905292	-4.44562	7.7984e-05	0.00171324
CD58	-0.414283	-1.78701	0.0821928	0.460293	-0.783229	-3.43244	0.00149614	0.0530724	-1.21302	-4.73967	3.19138e-05	0.000987108
CASP9	-0.287479	-2.24542	0.0308493	0.429556	-0.432509	-3.43219	0.00149718	0.0530724	-0.595858	-4.21583	0.000155381	0.00262025
KRT8P4	0.789237	2.6688	0.0112646	0.382487	0.99911	3.43247	0.00149604	0.0530724	1.00678	3.08385	0.00386782	0.0210759
LDHA	-0.354545	-1.82021	0.0768849	0.458986	-0.657828	-3.43122	0.00150126	0.0530848	-1.08051	-5.02489	1.32938e-05	0.000586942
UBAP1	-0.315442	-2.27372	0.0289244	0.425116	-0.468589	-3.43158	0.00149974	0.0530848	-0.704547	-4.60019	4.88247e-05	0.00127634
TNIK	-0.311786	-2.16197	0.03721	0.438342	-0.487048	-3.43122	0.00150126	0.0530848	-0.515281	-3.23656	0.00256485	0.0162404
KAAG1	0.137388	0.554495	0.582602	0.784249	0.836702	3.43086	0.00150273	0.0530927	0.941622	3.44249	0.00145483	0.011178
RP11-999E24.3	1.12378	3.25342	0.00244989	0.324742	1.16633	3.43054	0.00150407	0.0530961	1.36381	3.57651	0.000998556	0.00870947
HDAC2	-0.309175	-2.32301	0.0258268	0.425091	-0.449256	-3.42945	0.00150865	0.0531978	-0.664928	-4.52552	6.12435e-05	0.00147714
WI2-1896O14.1	-0.338542	-0.922754	0.362159	0.642116	-1.23835	-3.42926	0.00150944	0.0531978	-1.68983	-4.17219	0.00017693	0.00284761
BCKDK	-0.245344	-1.85959	0.0709702	0.457214	-0.445276	-3.42891	0.00151094	0.0532069	-0.644085	-4.42215	8.3707e-05	0.00178331
LONRF3	-0.546506	-2.85293	0.00707475	0.365913	-0.646254	-3.42755	0.00151666	0.0533202	-0.458948	-2.17024	0.0365314	0.0908603
MTCO3P4	0.490514	1.39825	0.170427	0.505645	1.1835	3.42755	0.00151665	0.0533202	0.642193	1.65823	0.10579	0.190378
RP11-180P8.5	0.640848	1.72402	0.0931147	0.466134	1.25393	3.42724	0.00151796	0.0533219	1.07707	2.6247	0.0125631	0.0450421
RP11-110A12.2	0.615627	3.22414	0.00265282	0.328535	0.644023	3.42675	0.00152006	0.0533518	0.499269	2.36853	0.0232352	0.0671237
TOLLIP	-0.222512	-1.68617	0.100243	0.471051	-0.44489	-3.42518	0.00152667	0.0534526	-0.654924	-4.49559	6.70542e-05	0.00155772
TERF1P2	0.946409	3.53539	0.00112144	0.300832	0.902608	3.42563	0.00152476	0.0534526	1.05516	3.57046	0.00101579	0.00881182
ZDHHC8P1	0.479277	2.33439	0.0251557	0.425091	0.692089	3.42478	0.0015284	0.0534526	0.77874	3.43579	0.00148225	0.0113107
LINC01620	0.344111	1.68198	0.10106	0.471736	0.689684	3.42497	0.00152759	0.0534526	0.729145	3.22838	0.00262252	0.0165004
PPP1R14C	0.362844	1.93284	0.0609963	0.455124	0.632775	3.42459	0.00152918	0.0534526	0.599556	2.89304	0.00638054	0.029136
RPGR	-0.269664	-2.02725	0.0499423	0.447062	-0.448278	-3.42386	0.00153231	0.053518	-0.607592	-4.13756	0.000196086	0.00304023
GCSAML	-0.329919	-1.60026	0.118111	0.478922	-0.694581	-3.42287	0.00153654	0.0535801	-1.1341	-4.98289	1.51304e-05	0.000630532
SPDYE7P	0.566068	2.74225	0.00937424	0.369421	0.695451	3.42286	0.0015366	0.0535801	0.886071	3.88825	0.000407995	0.00484894
STK33P1	0.977294	4.18959	0.000168008	0.211072	0.78535	3.42053	0.00154657	0.0538227	0.894577	3.47386	0.00133284	0.0105224
ZNF192P2	0.364282	1.47729	0.148125	0.493031	0.830155	3.42035	0.00154733	0.0538227	0.751508	2.76063	0.00894949	0.036294
MTND2P13	0.5751	2.37379	0.0229512	0.419875	0.815745	3.42088	0.00154507	0.0538227	0.640633	2.39528	0.0218241	0.0645132
FAM89B	-0.264448	-1.76952	0.0851123	0.461908	-0.502941	-3.41913	0.0015526	0.0538308	-0.797033	-4.83101	2.41287e-05	0.000838823
CA4	0.48258	2.44079	0.0196006	0.410343	0.665522	3.41986	0.00154946	0.0538308	0.824758	3.77864	0.000560517	0.00597219
PMEPA1	-0.232995	-1.67075	0.103275	0.472882	-0.469349	-3.41935	0.00155163	0.0538308	-0.507639	-3.29737	0.00217272	0.0145718
AC004221.2	0.400487	1.69573	0.0984006	0.469341	0.794813	3.41914	0.00155253	0.0538308	0.6654	2.55211	0.0150042	0.0505071
CSNK1D	-0.323399	-2.37891	0.0226783	0.419403	-0.457404	-3.4184	0.00155575	0.0538959	-0.632418	-4.21396	0.000156247	0.00262864
RELB	-0.408212	-1.17652	0.246956	0.558223	-1.16715	-3.41763	0.0015591	0.0539247	-2.20518	-5.75713	1.37349e-06	0.000208045
H3F3AP4	-0.249991	-1.56828	0.125394	0.482237	-0.536229	-3.41769	0.00155881	0.0539247	-0.986396	-5.60529	2.20183e-06	0.000262713
LINC00692	0.594251	2.2184	0.032794	0.430927	0.900845	3.41667	0.00156324	0.0540241	0.67773	2.29179	0.0277524	0.0752898
WBP1LP5	1.2147	3.7312	0.000642513	0.300832	1.09462	3.41608	0.0015658	0.0540689	1.58778	4.41792	8.47809e-05	0.00179767
CIB1	-0.324903	-2.17421	0.0362092	0.436685	-0.502377	-3.41556	0.00156808	0.0541038	-0.911025	-5.52237	2.84875e-06	0.000283647
CBX6	-0.261702	-1.40043	0.169779	0.505645	-0.627667	-3.41246	0.00158164	0.0541383	-1.02172	-4.95259	1.66093e-05	0.000655327
VSTM2B	0.757359	2.83584	0.00739162	0.365913	0.897561	3.41451	0.00157268	0.0541383	1.18396	4.01574	0.000280976	0.00383815
GLT6D1	1.0184	3.36262	0.00181577	0.320558	1.01698	3.41159	0.00158549	0.0541383	1.30462	3.90203	0.000391951	0.00473858
CCDC71L	-0.487762	-2.6429	0.0120113	0.386887	-0.62023	-3.41437	0.00157329	0.0541383	-0.768601	-3.77244	0.000570634	0.0060408
CTA-342B11.1	0.602692	2.4738	0.018119	0.403903	0.818432	3.413	0.00157927	0.0541383	1.00815	3.74837	0.000611583	0.00629632
STEAP3	-0.255854	-1.3354	0.189966	0.518956	-0.643733	-3.41357	0.00157679	0.0541383	-0.763769	-3.61101	0.000905564	0.00816231
AC005796.2	1.0573	3.12787	0.003439	0.338062	1.13512	3.41173	0.00158483	0.0541383	1.33456	3.57633	0.000999068	0.00870947
KIF1B	-0.387869	-2.76463	0.00885954	0.365913	-0.471229	-3.41247	0.00158162	0.0541383	-0.529592	-3.41933	0.00155173	0.0116509
CTB-58E17.1	-0.277905	-1.76248	0.0863107	0.462363	-0.529597	-3.41239	0.00158196	0.0541383	-0.567444	-3.25986	0.00240723	0.0156126
TEX37	0.506427	2.32353	0.025796	0.425091	0.732381	3.41391	0.00157529	0.0541383	0.766101	3.18394	0.00295778	0.0178307
OR4A44P	0.529935	1.9091	0.064088	0.455813	0.932277	3.4122	0.0015828	0.0541383	0.825231	2.69295	0.0106073	0.0403373
ISCA1P6	1.22441	3.79379	0.000536549	0.300832	1.08374	3.41157	0.00158556	0.0541383	0.942592	2.64556	0.0119327	0.0434754
F2RL3	0.26319	1.82898	0.0755327	0.458879	0.483296	3.41222	0.0015827	0.0541383	0.382761	2.40944	0.021109	0.0631556
CLEC2L	0.554594	2.71542	0.0100279	0.372436	0.685645	3.41071	0.00158936	0.0541815	0.821377	3.64293	0.000826992	0.00767767
RP11-554D15.3	0.997108	2.79518	0.00819934	0.365913	1.19755	3.41071	0.00158935	0.0541815	1.00269	2.54613	0.0152235	0.0509457
PTGER4	-0.278425	-1.6035	0.117392	0.478886	-0.582733	-3.40969	0.00159387	0.054292	-0.763616	-3.98367	0.000308718	0.00407847
DRAP1	-0.366386	-1.83072	0.0752671	0.458878	-0.671434	-3.40856	0.00159888	0.0544193	-1.45571	-6.58879	1.04306e-07	0.000109602
TAPBPL	-0.310836	-2.25633	0.0300942	0.428938	-0.462105	-3.40797	0.0016015	0.0544649	-0.787837	-5.18029	8.22702e-06	0.000453012
RPA2P2	1.35767	3.7836	0.00055256	0.300832	1.2035	3.40754	0.00160341	0.0544867	1.43857	3.63153	0.000854267	0.00784225
MAP4	-0.20225	-1.51586	0.138117	0.488648	-0.44743	-3.40705	0.00160557	0.0545166	-0.553333	-3.75668	0.000597132	0.00619541
RUSC1-AS1	-0.258336	-2.11397	0.041373	0.443248	-0.409766	-3.40669	0.00160718	0.054528	-0.155096	-1.14964	0.257725	0.364806
RHBDF2	-0.329872	-1.8688	0.0696436	0.456803	-0.59167	-3.4055	0.00161249	0.0546267	-0.786308	-4.03514	0.000265387	0.00371064
HS3ST2	0.738725	2.2452	0.0308651	0.429556	1.10286	3.40547	0.00161265	0.0546267	1.16393	3.2044	0.00279865	0.0172204
LAMTOR2	-0.284921	-1.96822	0.0566276	0.450643	-0.485138	-3.40485	0.0016154	0.0546766	-0.970312	-6.07168	5.16873e-07	0.000170656
HSH2D	-0.439575	-2.32444	0.0257417	0.425091	-0.63362	-3.40407	0.00161892	0.0547499	-1.09833	-5.26098	6.40905e-06	0.00039982
TDRD7	-0.457842	-2.38368	0.0224264	0.419403	-0.643497	-3.40378	0.0016202	0.0547499	-1.07564	-5.07277	1.14685e-05	0.000537146
XXYLT1-AS1	0.54659	2.8423	0.00727043	0.365913	0.64419	3.40334	0.00162219	0.0547499	0.847816	3.99353	0.000299916	0.00400592
HDAC9	-0.288893	-2.31694	0.0261915	0.425091	-0.417666	-3.40323	0.00162269	0.0547499	-0.51814	-3.7642	0.00058434	0.00611617
DRAM1	-0.354164	-1.12474	0.267998	0.573071	-1.05467	-3.40288	0.00162427	0.0547599	-1.93735	-5.57319	2.43272e-06	0.000273647
RAB7A	-0.319739	-2.00883	0.0519505	0.449099	-0.532971	-3.402	0.00162822	0.0548497	-0.775356	-4.41262	8.61456e-05	0.00181417
PLEK	-0.383333	-1.24695	0.220309	0.53986	-1.02923	-3.40151	0.00163046	0.0548819	-2.22284	-6.54983	1.17619e-07	0.000109602
AP000344.3	0.755984	3.29468	0.00218876	0.320558	0.768122	3.40106	0.00163248	0.0549066	0.696522	2.74969	0.00920019	0.036925
TMEM35B	-0.319073	-1.63249	0.111124	0.476522	-0.654141	-3.40029	0.00163599	0.0549382	-1.00175	-4.64267	4.29055e-05	0.00118468
PLP1	0.570839	2.63383	0.0122836	0.387514	0.725404	3.40046	0.00163523	0.0549382	0.941782	3.93615	0.000354803	0.00446177
SKIDA1	0.34947	1.80313	0.0795783	0.459234	0.648383	3.39887	0.00164245	0.0550736	0.976805	4.56535	5.42756e-05	0.00136135
NCS1	-0.509692	-2.07009	0.0455325	0.44458	-0.823693	-3.39883	0.0016426	0.0550736	-0.900696	-3.31365	0.00207783	0.0141826
TSG101	-0.276767	-1.9785	0.0554103	0.449984	-0.467794	-3.39751	0.00164866	0.0551551	-0.750363	-4.85894	2.21482e-05	0.000793009
IDI1	-0.405962	-1.97558	0.0557544	0.449984	-0.686858	-3.39594	0.00165584	0.0551551	-1.08184	-4.76892	2.91834e-05	0.000934378
PML	-0.320961	-2.06233	0.0463045	0.445673	-0.520306	-3.39664	0.00165265	0.0551551	-0.733854	-4.27133	0.000131657	0.00236191
TNFSF15	-0.69357	-1.60882	0.116221	0.478727	-1.4417	-3.39763	0.00164811	0.0551551	-2.01559	-4.23513	0.000146691	0.00252353
SPON1	-0.320623	-2.62605	0.0125213	0.388834	-0.408097	-3.3959	0.00165601	0.0551551	-0.506089	-3.75477	0.000600431	0.00621786
RIN3	-0.382914	-3.34356	0.00191378	0.320558	-0.38278	-3.39579	0.00165653	0.0551551	-0.403284	-3.18982	0.00291114	0.0176407
RP11-317B7.3	0.174904	0.660717	0.512918	0.742889	0.885058	3.39681	0.00165187	0.0551551	0.881229	3.01545	0.00463585	0.0235775
TRAJ3	-0.42938	-2.37104	0.0230994	0.419875	-0.60528	-3.39576	0.00165665	0.0551551	-0.534391	-2.67303	0.0111469	0.0416554
RP11-411A19.5	0.622971	2.46487	0.0185095	0.405869	0.844795	3.39595	0.0016558	0.0551551	0.482815	1.73043	0.0919504	0.171761
RHBDD3	-0.212039	-1.59385	0.119542	0.480056	-0.444524	-3.39478	0.00166118	0.0552527	-0.537744	-3.66147	0.000784445	0.00738703
MMP16	0.323749	1.68704	0.100075	0.470755	0.641185	3.39456	0.00166217	0.0552527	0.745528	3.51907	0.00117412	0.00968572
HCP5	-0.27431	-1.86434	0.0702837	0.456803	-0.491533	-3.39407	0.00166446	0.0552856	-0.897877	-5.52774	2.80162e-06	0.000282243
IQCD	0.201706	1.40509	0.168399	0.50504	0.479384	3.39276	0.00167052	0.0554439	0.432777	2.73084	0.00964708	0.0380424
RP11-46D6.4	0.535282	2.22557	0.0322672	0.430927	0.802971	3.3919	0.00167448	0.0555323	0.72417	2.72739	0.00973106	0.0382511
RAC2	-0.309638	-1.92156	0.0624482	0.455813	-0.537672	-3.39002	0.00168324	0.0556498	-0.893791	-5.0244	1.33138e-05	0.000586942
ATP11A	-0.272741	-2.09737	0.0429052	0.443452	-0.433991	-3.3907	0.00168008	0.0556498	-0.586952	-4.08859	0.000226671	0.00334725
ID1	0.339394	1.43764	0.159003	0.499904	0.787805	3.39039	0.00168152	0.0556498	0.968831	3.71742	0.000668424	0.00666941
TBX1	0.134294	0.646061	0.522257	0.748456	0.693637	3.39026	0.0016821	0.0556498	0.707603	3.08358	0.00387067	0.0210853
DOCK10	-0.398142	-2.2203	0.0326536	0.430927	-0.598123	-3.38882	0.00168883	0.0556839	-1.07033	-5.40678	4.07844e-06	0.00032776
DESI1	-0.284133	-1.82421	0.0762666	0.458986	-0.519517	-3.38873	0.00168927	0.0556839	-0.865025	-5.03071	1.30575e-05	0.000579181
ENPEP	0.582696	2.86419	0.00687312	0.363953	0.67859	3.38883	0.00168876	0.0556839	0.857739	3.81911	0.000498673	0.00553699
RP11-791G16.4	0.440945	1.80783	0.0788293	0.459234	0.813529	3.38868	0.00168948	0.0556839	0.876425	3.25489	0.00244005	0.0157398
SKIL	-0.463294	-2.39105	0.0220418	0.416969	-0.646147	-3.38803	0.00169254	0.0557416	-0.873005	-4.08128	0.000231622	0.00338411
HSP90AA1	-0.313708	-1.52606	0.135562	0.487058	-0.68532	-3.38707	0.00169705	0.0557613	-1.29348	-5.69972	1.64184e-06	0.000227699
HIVEP2	-0.348561	-2.32327	0.0258112	0.425091	-0.500237	-3.38752	0.00169492	0.0557613	-0.705827	-4.26155	0.000135562	0.00239927
RPSAP23	0.626207	2.09505	0.0431231	0.443591	0.996524	3.38726	0.00169615	0.0557613	0.87752	2.65939	0.011531	0.0425086
IER3	-0.353231	-0.962609	0.34204	0.627642	-1.22192	-3.38311	0.00171573	0.0560071	-2.38355	-5.88387	9.263e-07	0.000186173
SH2D4A	0.212038	1.50852	0.139977	0.489709	0.468034	3.38299	0.00171634	0.0560071	0.78141	5.03576	1.28555e-05	0.000575599
B4GALT1	-0.18117	-0.970684	0.338056	0.624373	-0.621675	-3.38407	0.00171121	0.0560071	-0.973234	-4.72342	3.35384e-05	0.00101457
SAV1	-0.395135	-2.28238	0.0283574	0.425091	-0.576735	-3.38456	0.00170886	0.0560071	-0.89697	-4.69319	3.67816e-05	0.00107545
MFSD2A	-0.361575	-1.8733	0.0690035	0.456803	-0.643042	-3.38479	0.00170777	0.0560071	-0.995761	-4.67317	3.90966e-05	0.00111275
THEGL	0.227479	1.13965	0.261814	0.569145	0.664873	3.38416	0.00171076	0.0560071	0.720236	3.26852	0.00235102	0.0153671
RP11-643G16.4	0.299533	1.13728	0.262786	0.56993	0.877375	3.38449	0.00170922	0.0560071	0.913449	3.14164	0.00331438	0.019212
RP11-282A11.3	0.0362914	0.11718	0.907356	0.958412	1.0313	3.38313	0.00171567	0.0560071	1.04428	3.05432	0.00418335	0.0221138
RP5-996D20.3	0.623178	1.74192	0.0898949	0.464262	1.19128	3.38309	0.00171583	0.0560071	0.949876	2.40508	0.0213266	0.0635912
OR7D4	0.799872	3.15654	0.00318428	0.330138	0.84343	3.38162	0.00172286	0.0560914	1.34157	4.79571	2.68852e-05	0.000892309
HMGCS2	0.346389	1.72272	0.0933534	0.46619	0.669295	3.38183	0.00172186	0.0560914	0.872433	3.93033	0.000360883	0.00450025
C1QA	0.789685	2.74654	0.00927356	0.369421	0.957048	3.38181	0.00172195	0.0560914	0.272973	0.86	0.395369	0.502236
RP11-211F2.1	1.33448	3.02761	0.00448951	0.343446	1.46691	3.38124	0.00172465	0.0561068	1.55897	3.20387	0.00280267	0.0172353
GPLD1	0.146765	1.30704	0.199324	0.525642	0.373614	3.38046	0.00172839	0.056186	0.340914	2.75017	0.00918892	0.036925
KLHL5	-0.256654	-1.51857	0.137435	0.488276	-0.562094	-3.37892	0.00173576	0.0562664	-1.00535	-5.38826	4.31969e-06	0.000334267
PFDN2	-0.392896	-2.34016	0.0248215	0.425091	-0.558357	-3.37881	0.00173629	0.0562664	-0.951162	-5.1318	9.55748e-06	0.000486009
FAM160A2	-0.224331	-1.91109	0.0638234	0.455813	-0.390385	-3.37885	0.00173608	0.0562664	-0.5931	-4.57686	5.2411e-05	0.00132813
STX3	-0.355576	-2.28285	0.0283264	0.425091	-0.517968	-3.37857	0.00173745	0.0562664	-0.635966	-3.69852	0.000705632	0.00689885
RP11-472F21.1	0.892477	2.31346	0.0264028	0.425091	1.28291	3.37866	0.00173701	0.0562664	0.344078	0.807922	0.424339	0.529922
RP11-401I19.2	0.751714	2.67062	0.0112138	0.382281	0.935785	3.37769	0.00174168	0.0563604	0.889199	2.86158	0.0069193	0.0307361
TMX2	-0.33783	-2.07062	0.0454795	0.44458	-0.542344	-3.37723	0.00174388	0.056389	-1.03875	-5.76714	1.33143e-06	0.000207834
FEZF1	0.833958	3.63806	0.000838556	0.300832	0.761787	3.37631	0.00174832	0.0564044	1.03377	4.08503	0.000229069	0.0033659
LINC01405	0.285917	1.70101	0.097397	0.46826	0.558635	3.37659	0.00174701	0.0564044	0.453617	2.44457	0.0194255	0.0598456
FAM198A	0.327356	2.28533	0.0281662	0.425091	0.476054	3.37651	0.00174737	0.0564044	0.377351	2.38628	0.0222898	0.0653428
TNFRSF18	-0.717039	-2.24215	0.0310794	0.429556	-1.06251	-3.3755	0.00175225	0.0564885	-1.4503	-4.10796	0.000214056	0.00321498
CEBPB	-0.517847	-2.09126	0.0434816	0.444359	-0.822303	-3.37382	0.00176042	0.0566664	-1.1925	-4.36225	0.000100246	0.00200281
RP11-124N14.3	-0.484312	-1.71905	0.0940267	0.466775	-0.935614	-3.37399	0.00175961	0.0566664	-1.11676	-3.59062	0.000959458	0.00845538
MED27	-0.161805	-1.28861	0.205595	0.529944	-0.416775	-3.37221	0.00176828	0.0568339	-0.496493	-3.5817	0.000984004	0.00861369
RP11-646J21.7	0.774941	2.05786	0.0467552	0.44684	1.25002	3.37246	0.00176707	0.0568339	1.32621	3.19013	0.00290875	0.0176361
SIPA1L1	-0.241467	-2.07765	0.0447902	0.44458	-0.38571	-3.37178	0.00177038	0.0568586	-0.591776	-4.61232	4.70568e-05	0.00125242
RP11-168O22.1	0.270161	1.13297	0.264572	0.571568	0.791297	3.37146	0.00177195	0.0568662	0.839663	3.18968	0.00291228	0.0176426
ARHGEF3	-0.398475	-2.76003	0.00896314	0.366097	-0.478939	-3.37037	0.0017773	0.056983	-0.718713	-4.50938	6.43132e-05	0.0015228
CTB-23I7.2	0.721908	2.12778	0.0401349	0.442925	1.12544	3.37017	0.00177826	0.056983	0.862206	2.30199	0.0271097	0.0740715
DTHD1	-0.346597	-2.49194	0.0173493	0.401448	-0.461337	-3.36988	0.0017797	0.0569831	-0.657172	-4.27995	0.000128307	0.00232723
SLC9B1P3	0.655705	2.47095	0.0182427	0.405009	0.880121	3.36963	0.00178093	0.0569831	0.762056	2.6013	0.0133069	0.0467822
CLIC4	-0.419416	-1.46098	0.152525	0.496795	-0.951865	-3.36867	0.00178564	0.0570592	-1.85463	-5.85201	1.02271e-06	0.000186173
NFKBIB	-0.265758	-1.45601	0.153887	0.497044	-0.605136	-3.36833	0.00178732	0.0570592	-0.981465	-4.87081	2.13555e-05	0.000772397
CLDN12	-0.433935	-2.43646	0.0198031	0.411189	-0.590475	-3.36836	0.00178717	0.0570592	-0.569763	-2.89785	0.0063016	0.0289029
B4GALT5	-0.36205	-1.54798	0.130203	0.484123	-0.775191	-3.36736	0.00179213	0.0571701	-1.32187	-5.11958	9.92541e-06	0.000495381
NRROS	-0.438856	-2.14399	0.0387238	0.440514	-0.678117	-3.36581	0.00179985	0.0572465	-1.24491	-5.50915	2.96816e-06	0.0002898
ARFGAP3	-0.410742	-1.93512	0.0607057	0.454818	-0.702952	-3.36472	0.00180524	0.0572465	-1.24952	-5.33251	5.13503e-06	0.000366671
JAGN1	-0.35258	-2.17753	0.0359425	0.436098	-0.536271	-3.36492	0.00180428	0.0572465	-0.889022	-4.97354	1.5572e-05	0.000638963
NOX1	0.597238	2.8101	0.0078939	0.365913	0.704067	3.36567	0.00180051	0.0572465	0.926691	3.94963	0.000341086	0.00435352
RN7SL62P	0.935392	2.81564	0.0077832	0.365913	1.10044	3.36536	0.00180205	0.0572465	1.27543	3.47767	0.00131868	0.0104445
ADAM3B	0.619117	2.37771	0.0227419	0.419403	0.862402	3.36496	0.00180408	0.0572465	0.983698	3.42212	0.00153974	0.0115915
CTA-254O6.1	0.912165	2.36253	0.0235627	0.421277	1.27893	3.36539	0.00180193	0.0572465	1.02895	2.41404	0.0208812	0.0627155
RP11-225B17.2	0.32375	1.22002	0.230234	0.547266	0.879232	3.36624	0.00179768	0.0572465	0.57484	1.96224	0.0573465	0.12372
DAP	-0.213536	-1.19424	0.240043	0.553691	-0.592119	-3.36444	0.00180668	0.0572494	-0.643077	-3.25784	0.0024205	0.0156728
ITGA9	0.39231	2.08	0.0445624	0.444502	0.624429	3.36357	0.00181101	0.0573442	0.574188	2.75762	0.00901782	0.03647
FTSJ3	-0.231687	-1.76525	0.0858367	0.462239	-0.434386	-3.36252	0.00181624	0.057467	-0.676013	-4.66561	4.0009e-05	0.00112879
RP11-174G17	1.06606	3.14802	0.00325807	0.332144	1.12046	3.36152	0.00182126	0.0575834	1.15404	3.08689	0.00383662	0.0209786
U62631.5	-0.544498	-2.67001	0.011231	0.382321	-0.674464	-3.36015	0.00182818	0.057674	-1.28235	-5.69599	1.66096e-06	0.000228865
TRAJ9	-0.218086	-1.00445	0.321734	0.613822	-0.718086	-3.36018	0.00182803	0.057674	-0.678905	-2.83243	0.0074565	0.0323154
RPL34P33	0.704594	3.10567	0.00364931	0.338618	0.750374	3.3603	0.00182744	0.057674	0.000747304	0.00298374	0.997635	0.99829
ARPC2	-0.334345	-1.96054	0.0575522	0.451227	-0.563954	-3.35976	0.00183013	0.057693	-1.07884	-5.73041	1.49246e-06	0.000220891
PPP3CB	-0.2076	-1.34422	0.187122	0.517335	-0.510487	-3.35825	0.00183779	0.0578918	-0.633308	-3.71456	0.000673943	0.00670724
RNU6-629P	0.840002	2.47362	0.0181267	0.403903	1.12234	3.35786	0.00183975	0.0579109	0.928568	2.47694	0.0179838	0.0568222
LST1	-0.346222	-1.33277	0.190817	0.519594	-0.857785	-3.35478	0.00185548	0.057918	-1.97264	-6.87856	4.28047e-08	0.000109602
APOL2	-0.405689	-1.77391	0.0843713	0.461395	-0.754744	-3.35291	0.0018651	0.057918	-1.39697	-5.53316	2.75484e-06	0.00028213
SHKBP1	-0.263441	-1.70571	0.0965081	0.467809	-0.509972	-3.35469	0.00185596	0.057918	-0.920139	-5.39664	4.2089e-06	0.000330509
PGAM1	-0.362398	-1.92527	0.0619673	0.455813	-0.621634	-3.35524	0.0018531	0.057918	-1.10806	-5.33234	5.1376e-06	0.000366671
PSMB2	-0.26079	-1.4916	0.144346	0.491685	-0.577657	-3.35671	0.00184561	0.057918	-0.991447	-5.13662	9.41624e-06	0.000482281
CYP51A1	-0.496601	-1.97238	0.0561323	0.450341	-0.830633	-3.35179	0.00187084	0.057918	-1.40583	-5.05783	1.20096e-05	0.000553061
TAOK3	-0.35939	-2.4522	0.0190764	0.408708	-0.484088	-3.35582	0.00185016	0.057918	-0.797644	-4.93001	1.78043e-05	0.00068146
USP6NL	-0.30166	-1.89247	0.0663325	0.455988	-0.526084	-3.35313	0.00186394	0.057918	-0.824371	-4.6847	3.77468e-05	0.00108943
NAB2	-0.396817	-2.2418	0.0311043	0.429556	-0.584816	-3.35667	0.00184582	0.057918	-0.864924	-4.4262	8.26896e-05	0.00177225
CERS5	-0.251115	-2.02765	0.0498994	0.447062	-0.408829	-3.35387	0.00186016	0.057918	-0.5606	-4.10035	0.000218927	0.00326518
KCNMB4	0.311452	1.97607	0.0556962	0.449984	0.520213	3.35333	0.0018629	0.057918	0.700588	4.02645	0.000272259	0.00377066
EVL	-0.388967	-2.56168	0.0146592	0.396258	-0.501319	-3.35436	0.00185763	0.057918	-0.626738	-3.73891	0.000628442	0.00640118
HOMER2P1	0.871351	4.08581	0.000228544	0.224261	0.704255	3.35505	0.00185409	0.057918	0.853356	3.62463	0.000871209	0.00794655
MTCYBP29	1.32574	3.69799	0.000706705	0.300832	1.18395	3.35526	0.00185304	0.057918	1.41105	3.56532	0.00103064	0.00888292
ITLN2	0.743044	3.17589	0.00302269	0.328535	0.771792	3.35146	0.00187252	0.057918	0.916014	3.54651	0.00108685	0.00919482
ZSWIM8	-0.275875	-1.98374	0.0547994	0.449984	-0.459095	-3.35396	0.00185967	0.057918	-0.537846	-3.5033	0.0012273	0.00997186
LINC01213	1.37681	3.67818	0.000747892	0.300832	1.23503	3.35213	0.00186909	0.057918	1.43041	3.46151	0.00137963	0.0107713
EXOSC3P1	0.964142	2.952	0.00547483	0.353419	1.0776	3.35209	0.0018693	0.057918	1.17359	3.25492	0.00243987	0.0157398
RP5-858B6.1	0.706938	1.61709	0.114418	0.477655	1.44264	3.35269	0.00186618	0.057918	1.45694	3.01886	0.00459431	0.0234632
RP11-547C5.2	0.911515	2.98383	0.00503758	0.350333	1.00773	3.3515	0.00187234	0.057918	0.95556	2.83345	0.00743701	0.0322576
SCRT1	0.511408	1.41812	0.164586	0.502906	1.19094	3.35521	0.00185326	0.057918	1.06324	2.67071	0.0112115	0.0418253
EGR3	-0.380876	-2.07838	0.0447194	0.44458	-0.604887	-3.35351	0.00186201	0.057918	-0.333636	-1.64915	0.107647	0.192915
C4orf51	0.203664	0.898151	0.374957	0.650777	0.749364	3.35747	0.00184176	0.057918	0.31333	1.25166	0.218611	0.322504
RP11-211G3.3	-0.193182	-0.671909	0.505848	0.738155	-0.949117	-3.35387	0.00186013	0.057918	-0.358678	-1.13004	0.265786	0.37283
SGK1	-0.486687	-2.23866	0.0313258	0.429556	-0.717057	-3.35102	0.00187482	0.0579222	-1.23315	-5.1381	9.37342e-06	0.000482201
FAM3B	0.636042	2.6718	0.0111812	0.382115	0.785168	3.35091	0.00187537	0.0579222	0.985896	3.75142	0.000606238	0.00625948
TXN	-0.483422	-1.59404	0.119499	0.480022	-0.999927	-3.34986	0.00188085	0.0579727	-1.84796	-5.51968	2.87268e-06	0.000284043
AC067945.3	-0.567598	-1.807	0.0789625	0.459234	-1.03539	-3.34891	0.00188577	0.0579727	-1.78276	-5.14109	9.28701e-06	0.00048026
TMEM138	-0.26342	-1.14351	0.260227	0.568107	-0.759431	-3.34937	0.00188338	0.0579727	-1.27099	-4.99783	1.44497e-05	0.000612926
LARS2	-0.160361	-1.19288	0.240567	0.554058	-0.443239	-3.34981	0.00188111	0.0579727	-0.612308	-4.12587	0.000203001	0.00311241
SLC31A2	-0.483714	-2.0022	0.052691	0.449167	-0.796446	-3.34933	0.00188356	0.0579727	-0.982488	-3.68378	0.000736025	0.00708818
AMMECR1L	-0.314268	-2.48982	0.0174375	0.402236	-0.416038	-3.34877	0.0018865	0.0579727	-0.480619	-3.44919	0.00142794	0.0110413
RABEPKP1	0.779909	2.29164	0.0277617	0.425091	1.12192	3.34927	0.00188391	0.0579727	1.23395	3.28434	0.00225157	0.0149226
CLHC1	0.0890528	0.611557	0.544599	0.762212	0.479779	3.34746	0.00189334	0.0580573	1.07271	6.67298	8.04783e-08	0.000109602
CTNS	-0.360492	-1.92436	0.0620854	0.455813	-0.61724	-3.34756	0.00189277	0.0580573	-1.05653	-5.1088	1.02614e-05	0.000503234
LINC01570	0.606617	2.52022	0.0162079	0.400271	0.793181	3.34797	0.00189067	0.0580573	1.06171	3.99557	0.000298128	0.00399409
PSMB10	-0.314923	-1.55299	0.129003	0.483455	-0.667938	-3.34645	0.00189859	0.0581767	-1.38463	-6.1851	3.63534e-07	0.000149311
LUZP1	-0.255343	-1.90136	0.0651246	0.455988	-0.442267	-3.34586	0.00190167	0.0582292	-0.52045	-3.51047	0.00120283	0.00983978
BTF3L4P4	0.477808	1.56294	0.126646	0.482675	1.00663	3.34535	0.00190438	0.0582704	1.029	3.04895	0.00424324	0.0223088
DSE	-0.349836	-1.42921	0.161398	0.501231	-0.805834	-3.34471	0.00190769	0.05833	-1.58505	-5.86569	9.80119e-07	0.000186173
MARCKSL1	-0.381316	-2.16748	0.0367564	0.438194	-0.579088	-3.34425	0.00191015	0.0583634	-0.838399	-4.31687	0.000114877	0.00217218
PLEKHG1	-0.109758	-0.826838	0.41367	0.677423	-0.43691	-3.34394	0.00191174	0.0583703	-0.63456	-4.33016	0.000110387	0.00211539
LRRC37A11P	0.457311	2.24915	0.0305897	0.429556	0.669157	3.34362	0.00191343	0.0583802	0.758837	3.38066	0.0017274	0.0125273
ATF5	-0.351636	-1.20051	0.237629	0.552164	-0.963705	-3.34272	0.00191819	0.0583964	-1.89541	-5.86168	9.92424e-07	0.000186173
BCL2A1	-0.570373	-1.7296	0.0921007	0.465633	-1.08517	-3.34325	0.00191538	0.0583964	-2.06759	-5.67936	1.74906e-06	0.000233873
TFEC	-0.44893	-1.57439	0.123974	0.481206	-0.938199	-3.34283	0.00191765	0.0583964	-1.58191	-5.02534	1.32754e-05	0.000586942
CTC-344H19.6	0.784291	3.066	0.00405577	0.342022	0.841572	3.34249	0.00191943	0.0583964	1.0237	3.62504	0.000870171	0.00793877
C10orf76	-0.169959	-1.46091	0.152545	0.496795	-0.382635	-3.34154	0.00192443	0.0584802	-0.493302	-3.84095	0.000468102	0.00531498
NAV2-IT1	0.582001	2.12033	0.0407981	0.442925	0.902756	3.34145	0.00192492	0.0584802	0.623718	2.05834	0.0467069	0.107466
ABCF1	-0.243842	-1.64819	0.107846	0.475452	-0.486497	-3.34089	0.00192789	0.0584872	-0.853056	-5.22304	7.20794e-06	0.000422269
CYP4F60P	0.908492	2.92797	0.00582836	0.356911	1.02036	3.34104	0.00192709	0.0584872	0.802062	2.34153	0.0247423	0.0698895
NDUFS8	-0.264166	-1.8327	0.0749658	0.458878	-0.473869	-3.34008	0.00193219	0.0585758	-0.849171	-5.33652	5.07159e-06	0.000366057
PI4K2A	-0.392839	-2.20173	0.0340473	0.434502	-0.586437	-3.33928	0.00193644	0.0585801	-0.995744	-5.05526	1.21053e-05	0.0005548
GPR83	0.463312	2.37748	0.022754	0.419403	0.640528	3.33938	0.00193591	0.0585801	0.689127	3.20325	0.00280733	0.0172471
PTCHD3	0.310959	1.55997	0.127345	0.482707	0.655257	3.33971	0.00193418	0.0585801	0.642571	2.92	0.00595025	0.0278843
IL3RA	-0.532591	-1.40697	0.167843	0.504754	-1.24389	-3.33854	0.0019404	0.0586583	-2.2791	-5.45384	3.52423e-06	0.000306263
RP11-515O17.3	0.545326	2.30644	0.026833	0.425091	0.776812	3.338	0.0019433	0.0587046	0.698461	2.67594	0.0110665	0.0414681
FNDC7	0.315177	1.53713	0.132833	0.485733	0.673399	3.33667	0.00195044	0.0588157	0.617108	2.72625	0.009759	0.0382975
RP11-445P17.8	-0.555818	-2.58613	0.0138105	0.394206	-0.705858	-3.33671	0.0019502	0.0588157	-0.425838	-1.79477	0.0809252	0.156931
CDK5P1	0.489532	1.60543	0.116967	0.478727	1.00139	3.33654	0.00195111	0.0588157	0.569952	1.69315	0.0988952	0.18099
DDX60L	-0.513207	-2.23623	0.031499	0.430302	-0.753577	-3.33607	0.00195366	0.0588508	-1.12037	-4.42215	8.37065e-05	0.00178331
HNRNPKP4	-0.149776	-1.2537	0.217874	0.538209	-0.392232	-3.33563	0.00195602	0.0588569	-0.410485	-3.11241	0.00358423	0.0201554
UGT2B25P	-0.0128126	-0.0557911	0.955811	0.980899	0.753969	3.33552	0.00195661	0.0588569	0.123786	0.488253	0.628274	0.709317
WDR11	-0.374558	-2.27803	0.0286406	0.425091	-0.539668	-3.33465	0.00196128	0.0589142	-0.947274	-5.21872	7.30486e-06	0.000424503
ENPP7P14	0.143815	0.606694	0.547787	0.764013	0.778049	3.3347	0.00196104	0.0589142	0.733038	2.80117	0.00807543	0.0339376
GPR141	-0.199484	-0.974833	0.336022	0.622847	-0.671586	-3.33433	0.00196303	0.0589252	-1.16168	-5.14229	9.25284e-06	0.00047967
CMC2	-0.278082	-1.96875	0.0565645	0.450643	-0.463516	-3.334	0.0019648	0.0589371	-0.640235	-4.10587	0.000215386	0.00323268
TMEM132E	0.529219	2.95722	0.00540074	0.352943	0.587211	3.3337	0.00196646	0.0589454	0.605266	3.06367	0.00408096	0.021789
PLEKHO1	-0.399027	-1.58409	0.12175	0.480581	-0.826281	-3.33264	0.00197219	0.0590189	-1.52534	-5.48517	3.1976e-06	0.000295001
ARL8B	-0.354826	-1.85175	0.072116	0.457884	-0.628518	-3.33248	0.00197305	0.0590189	-0.979886	-4.63222	4.42914e-05	0.0012058
PPP1R12C	-0.243997	-2.05373	0.0471742	0.44684	-0.389742	-3.33288	0.0019709	0.0590189	-0.485654	-3.70283	0.000696982	0.00684247
JDP2	0.143192	0.968807	0.33898	0.624908	0.484759	3.33217	0.00197474	0.0590279	0.335355	2.05527	0.0470172	0.107981
LMNA	-0.39748	-1.86277	0.0705097	0.456803	-0.699732	-3.33165	0.00197758	0.0590304	-1.20201	-5.10268	1.04573e-05	0.000507595
RP11-174O3.6	0.407425	1.8517	0.0721231	0.457884	0.721552	3.33176	0.00197694	0.0590304	0.630527	2.59581	0.013487	0.0471863
ACTB	-0.298497	-1.47417	0.148959	0.493867	-0.663629	-3.32978	0.00198774	0.059182	-1.40425	-6.28203	2.69195e-07	0.0001311
GTF2A2	-0.312667	-2.01568	0.0511959	0.448873	-0.508469	-3.33033	0.00198475	0.059182	-0.847309	-4.94799	1.68461e-05	0.000659209
TRAK1	-0.216879	-1.99195	0.053853	0.449602	-0.356829	-3.3297	0.0019882	0.059182	-0.544975	-4.53404	5.96836e-05	0.00145264
E2F6	-0.210511	-1.55314	0.128967	0.483455	-0.444237	-3.32992	0.00198697	0.059182	-0.504842	-3.37395	0.00175979	0.0126804
MAOA	-0.550517	-1.98306	0.0548782	0.449984	-0.909666	-3.32913	0.00199132	0.0592335	-0.75507	-2.46377	0.0185582	0.0580828
SMG7	-0.292514	-1.84253	0.0734831	0.458537	-0.520096	-3.3284	0.0019953	0.0593106	-0.477353	-2.72368	0.00982224	0.0384318
STAT6	-0.341835	-2.24902	0.0305984	0.429556	-0.497777	-3.32732	0.00200123	0.0593438	-0.802033	-4.77987	2.82212e-05	0.000915314
FBXW5	-0.282058	-1.6226	0.11323	0.477278	-0.569378	-3.32781	0.00199855	0.0593438	-0.862075	-4.49228	6.77277e-05	0.00156566
RPL5P5	0.604047	2.68234	0.0108917	0.379489	0.737536	3.32743	0.00200064	0.0593438	0.765132	3.0777	0.00393162	0.0212855
RP11-524G24.2	0.664647	2.25712	0.0300402	0.428938	0.96434	3.32719	0.00200198	0.0593438	0.918074	2.82416	0.0076158	0.0327273
CYP8B1	0.481011	2.58142	0.0139702	0.394734	0.610083	3.32642	0.00200622	0.0594283	0.843384	4.09993	0.0002192	0.0032681
EMILIN1	-0.571392	-2.23254	0.031763	0.430927	-0.837884	-3.32608	0.00200808	0.0594423	-0.953774	-3.37566	0.00175149	0.0126462
EIF4G2	-0.327428	-1.947	0.0592139	0.453848	-0.550349	-3.32486	0.00201485	0.059519	-0.894866	-4.8201	2.49494e-05	0.000853936
MRPS15P1	0.831817	2.36073	0.0236617	0.421277	1.15313	3.32491	0.00201456	0.059519	1.50405	3.86661	0.000434505	0.00505719
RP5-1125N11.1	1.40177	3.00731	0.00473629	0.348216	1.52559	3.32524	0.00201276	0.059519	1.80993	3.5173	0.00117996	0.00971513
ANXA5	-0.433459	-2.06854	0.0456853	0.44458	-0.685361	-3.32292	0.00202561	0.0597542	-1.17839	-5.09395	1.0743e-05	0.000512769
ABCC3	-0.4604	-2.75897	0.00898715	0.366097	-0.54581	-3.32305	0.00202487	0.0597542	-0.911989	-4.9505	1.67165e-05	0.000656519
TARDBP	-0.317393	-2.04596	0.0479725	0.44684	-0.507315	-3.32247	0.00202814	0.0597873	-0.546825	-3.19297	0.00288648	0.017556
MAPK6	-0.367794	-2.09736	0.0429057	0.443452	-0.573289	-3.32144	0.00203386	0.0598003	-0.956566	-4.94119	1.72022e-05	0.000667992
ZNF267	-0.454919	-2.00816	0.0520248	0.449099	-0.740521	-3.32113	0.00203558	0.0598003	-1.13421	-4.5353	5.94555e-05	0.00144874
OR10AB1P	0.578159	1.8477	0.0727141	0.457972	1.02288	3.32116	0.0020354	0.0598003	1.28577	3.72214	0.000659441	0.00661281
OR10Y1P	0.657219	2.32707	0.0255858	0.425091	0.92326	3.32129	0.00203471	0.0598003	0.940009	3.01494	0.00464206	0.0235858
LL22NC03-121E8.4	0.801151	2.57347	0.014244	0.395576	1.0178	3.32164	0.00203273	0.0598003	0.420513	1.22358	0.228905	0.333893
RP11-728F11.4	0.247977	1.25053	0.219015	0.538957	0.648056	3.32033	0.00204009	0.0598803	0.422494	1.92998	0.0613615	0.129563
SLC47A1	0.326137	2.20045	0.0341449	0.434502	0.484353	3.32015	0.0020411	0.0598803	0.164107	1.00297	0.322441	0.430113
ISOC2	-0.266203	-1.44356	0.15734	0.499312	-0.602311	-3.31839	0.00205099	0.0599118	-1.08345	-5.32207	5.30392e-06	0.000373016
FKBP1A	-0.251737	-1.35164	0.184757	0.515737	-0.608217	-3.31786	0.00205397	0.0599118	-1.07763	-5.2412	6.8138e-06	0.000409912
NECTIN2	-0.276846	-1.02819	0.310585	0.606008	-0.879261	-3.3177	0.00205484	0.0599118	-1.52223	-5.1211	9.87874e-06	0.000495381
VOPP1	-0.228134	-1.09621	0.280123	0.582118	-0.679672	-3.31809	0.00205268	0.0599118	-1.14768	-4.99543	1.4557e-05	0.000615644
IDH3A	-0.386478	-2.15213	0.0380315	0.440397	-0.586379	-3.31746	0.0020562	0.0599118	-0.929236	-4.68724	3.74548e-05	0.0010841
NACC1	-0.309157	-1.8486	0.07258	0.457972	-0.546292	-3.31874	0.002049	0.0599118	-0.855818	-4.63547	4.38555e-05	0.00120154
AC140912.1	0.76197	2.59625	0.0134725	0.392704	0.958897	3.31944	0.00204505	0.0599118	1.23	3.7963	0.000532666	0.00578694
RP11-93H12.4	0.884904	3.57359	0.00100683	0.300832	0.808641	3.31778	0.00205439	0.0599118	0.975786	3.56953	0.00101846	0.00882847
GBA2	-0.321503	-2.5432	0.0153321	0.399494	-0.412862	-3.31806	0.00205285	0.0599118	-0.442691	-3.17207	0.00305393	0.0182368
IGKV1OR2-108	0.728814	2.16669	0.0368208	0.438195	1.09849	3.31789	0.00205376	0.0599118	0.967406	2.60518	0.013181	0.0465041
CCL2	-0.542024	-0.884614	0.382121	0.65612	-2.00034	-3.31682	0.00205981	0.0599761	-3.75493	-5.55117	2.60501e-06	0.000277359
DOK3	-0.208876	-1.16845	0.250157	0.560729	-0.583323	-3.31524	0.00206882	0.0601972	-0.737427	-3.7367	0.000632451	0.00642495
NPM1P5	0.612139	2.11155	0.0415929	0.443248	0.945848	3.31479	0.00207134	0.0602295	0.859493	2.6856	0.0108036	0.0407699
FDX1	-0.362564	-1.95467	0.0582684	0.452465	-0.60511	-3.31441	0.00207353	0.0602523	-1.04446	-5.10068	1.0522e-05	0.000507927
TPM4	-0.367504	-1.62306	0.113132	0.477215	-0.738324	-3.31286	0.00208236	0.0602761	-1.38147	-5.52664	2.81121e-06	0.000282332
NELFE	-0.28306	-2.12293	0.0405656	0.442925	-0.434782	-3.31293	0.00208195	0.0602761	-0.780474	-5.30228	5.63931e-06	0.000381144
STAP1	-0.395871	-2.06575	0.0459631	0.444944	-0.624742	-3.31213	0.0020865	0.0602761	-1.0992	-5.19574	7.84315e-06	0.000439083
CACNA2D3	0.521714	3.16504	0.00311235	0.328535	0.537407	3.31233	0.0020854	0.0602761	0.661223	3.63364	0.000849164	0.00780715
ARHGAP8	0.275906	1.46463	0.151533	0.49626	0.614249	3.31279	0.00208273	0.0602761	0.71213	3.42431	0.00153039	0.0115475
DAB1	0.409508	2.56602	0.014505	0.396258	0.520328	3.31252	0.00208428	0.0602761	0.576627	3.27296	0.00232273	0.0152518
FIGLA	0.653703	2.87708	0.00664874	0.363804	0.740696	3.31204	0.00208705	0.0602761	0.812271	3.23832	0.0025526	0.0161864
AC026904.1	0.269497	1.66846	0.10373	0.473545	0.526706	3.31295	0.00208185	0.0602761	0.511585	2.86898	0.00678883	0.03033
MTND5P29	0.938101	2.91698	0.00599695	0.357259	1.0489	3.31362	0.00207799	0.0602761	0.913211	2.57219	0.0142887	0.048933
NDUFS3	-0.283094	-1.91496	0.0633124	0.455813	-0.481835	-3.31139	0.00209074	0.0603164	-0.843314	-5.16733	8.56363e-06	0.000464797
TAF11	-0.399059	-2.60706	0.0131201	0.391063	-0.498885	-3.3113	0.00209127	0.0603164	-0.759827	-4.49652	6.68648e-05	0.00155735
NFAM1	-0.424707	-2.15494	0.0377949	0.440397	-0.642129	-3.31019	0.00209768	0.0603704	-1.22541	-5.63215	2.02549e-06	0.000249334
PGM2	-0.347227	-1.92507	0.0619934	0.455813	-0.587713	-3.31041	0.00209639	0.0603704	-0.988716	-4.96537	1.59686e-05	0.000643491
XRN1	-0.515786	-2.58422	0.013875	0.394587	-0.650205	-3.30975	0.0021002	0.0603704	-0.948749	-4.30586	0.000118729	0.00220885
GALNS	-0.339554	-2.67529	0.0110845	0.381654	-0.413525	-3.31015	0.00209786	0.0603704	-0.515672	-3.6803	0.000743375	0.00712878
UBE2L5P	0.505205	2.89028	0.00642606	0.360746	0.569385	3.3095	0.00210162	0.0603704	0.656232	3.40077	0.00163379	0.0120865
GAPDHP59	1.04591	2.49811	0.0170941	0.400271	1.36384	3.30952	0.00210155	0.0603704	1.52933	3.30878	0.00210578	0.014283
EFCAB6	0.356637	2.23644	0.0314839	0.430302	0.519414	3.30924	0.00210314	0.0603734	0.672884	3.82224	0.000494171	0.00550561
CMTM6	-0.46103	-1.91318	0.0635472	0.455813	-0.784613	-3.308	0.00211033	0.060449	-1.38462	-5.20479	7.62655e-06	0.000432797
ELOVL5	-0.316934	-1.86853	0.0696826	0.456803	-0.552321	-3.30831	0.00210849	0.060449	-0.938026	-5.00949	1.39397e-05	0.000602668
ST3GAL5	-0.298709	-1.54639	0.130587	0.48456	-0.628906	-3.3078	0.00211143	0.060449	-0.997464	-4.67752	3.85824e-05	0.0011036
C8orf46	0.385421	2.22181	0.0325429	0.430927	0.564808	3.30792	0.00211074	0.060449	0.81314	4.24603	0.000141994	0.00246868
PIM2	-0.352289	-1.65825	0.105787	0.475244	-0.691364	-3.30628	0.00212025	0.060462	-1.43268	-6.10867	4.60805e-07	0.000157953
STX11	-0.456412	-1.74762	0.0888885	0.463825	-0.849993	-3.30666	0.00211809	0.060462	-1.71686	-5.95488	7.42882e-07	0.000184037
UBE2E2	-0.328267	-1.63069	0.111505	0.476564	-0.655102	-3.30626	0.00212038	0.060462	-1.27339	-5.72997	1.4945e-06	0.000220891
ACTR1B	-0.351813	-2.40931	0.0211153	0.414304	-0.475299	-3.30698	0.00211621	0.060462	-0.688861	-4.27327	0.000130896	0.00235519
RP11-640N11.2	0.447082	2.45778	0.018825	0.408178	0.591988	3.30638	0.00211971	0.060462	0.736151	3.66581	0.000774784	0.00732188
TMEM210	0.679316	2.34845	0.0243483	0.424833	0.941612	3.30723	0.00211477	0.060462	0.986977	3.09075	0.00379748	0.0208442
BST2	-0.408574	-1.75593	0.0874392	0.463017	-0.757058	-3.30559	0.00212429	0.0604927	-1.6983	-6.61146	9.7264e-08	0.000109602
ALDH7A1P1	0.362708	1.56126	0.12704	0.482707	0.755895	3.3057	0.00212367	0.0604927	0.773529	3.01607	0.00462822	0.023558
MINPP1	-0.373438	-2.04086	0.0485025	0.44684	-0.595232	-3.30495	0.00212805	0.0605593	-1.06213	-5.25797	6.46903e-06	0.000400397
ATP1B3	-0.419651	-2.12865	0.0400576	0.442925	-0.641211	-3.30447	0.00213085	0.0605986	-1.01567	-4.6668	3.98641e-05	0.00112619
ATP10D	-0.277527	-1.78101	0.083185	0.460679	-0.506697	-3.30365	0.00213566	0.0606055	-0.971656	-5.64834	1.92609e-06	0.000245868
MAP4K4	-0.316808	-2.33449	0.0251499	0.425091	-0.441189	-3.30297	0.0021396	0.0606055	-0.567724	-3.78949	0.000543243	0.00585831
CSTL1	0.412193	2.34975	0.0242748	0.424611	0.570301	3.303	0.00213944	0.0606055	0.711515	3.67411	0.00075664	0.00720524
SGO1P1	0.625221	3.11056	0.00360194	0.338618	0.653597	3.30369	0.00213541	0.0606055	0.718874	3.23971	0.002543	0.01614
SLC6A12	-0.550772	-2.05555	0.0469897	0.44684	-0.871129	-3.3031	0.00213886	0.0606055	-0.877976	-2.96815	0.00524869	0.025629
SOX21	0.454639	1.89276	0.0662928	0.455988	0.780955	3.30323	0.00213811	0.0606055	0.626813	2.36382	0.0234921	0.0675779
SRXN1	-0.752163	-2.13692	0.0393339	0.441911	-1.14417	-3.30256	0.00214202	0.0606338	-1.74375	-4.48751	6.8712e-05	0.00158308
WDR1	-0.293976	-1.87078	0.0693621	0.456803	-0.51074	-3.30212	0.00214459	0.0606665	-0.920044	-5.30353	5.61751e-06	0.000381144
CYCS	-0.4089	-1.97604	0.0557003	0.449984	-0.672445	-3.30156	0.00214792	0.0607203	-1.18673	-5.19491	7.86344e-06	0.000439643
MARS	-0.228421	-1.39342	0.171871	0.506443	-0.532597	-3.30086	0.00215199	0.0607551	-0.986758	-5.4526	3.53791e-06	0.000306534
RP11-318G8.2	1.16999	3.05083	0.00422227	0.342022	1.24598	3.30088	0.00215188	0.0607551	1.05987	2.50343	0.0168769	0.0544782
STMN2	0.640099	2.56909	0.0143971	0.395692	0.809411	3.30054	0.00215392	0.0607693	0.903057	3.28318	0.00225873	0.0149514
IRF2	-0.313636	-2.01344	0.0514419	0.448873	-0.505984	-3.30014	0.00215626	0.0607953	-0.900905	-5.23888	6.86295e-06	0.000410576
RPS27P25	1.26337	3.37676	0.00174615	0.312078	1.21518	3.29984	0.00215804	0.0608052	0.847857	2.05276	0.0472732	0.10838
ACAT2	-0.32204	-1.66044	0.105342	0.474977	-0.629613	-3.29815	0.00216805	0.0610185	-0.996265	-4.65303	4.15724e-05	0.00115836
AC104794.4	0.84246	2.73973	0.00943389	0.369421	0.998203	3.29808	0.00216847	0.0610185	1.08929	3.20886	0.00276508	0.0170865
SPDEF	0.344279	1.75751	0.0871659	0.462718	0.635722	3.29715	0.00217401	0.0611342	0.588132	2.71963	0.00992249	0.0386891
RHOBTB2	-0.311895	-2.58126	0.0139757	0.394734	-0.392028	-3.29629	0.00217912	0.0611569	-0.654383	-4.90574	1.91833e-05	0.000716486
CD19	-0.208683	-1.15812	0.254292	0.563239	-0.584655	-3.29649	0.00217797	0.0611569	-0.88093	-4.4285	8.21189e-05	0.00176627
LINC00561	0.452194	1.59976	0.118222	0.478932	0.917025	3.29605	0.00218054	0.0611569	0.715002	2.29131	0.0277826	0.0753483
RPL18AP7	0.0898881	0.442674	0.660599	0.828954	-0.658856	-3.29652	0.00217776	0.0611569	0.0384179	0.171381	0.864865	0.900582
IFIH1	-0.485623	-1.73205	0.091659	0.465392	-0.909483	-3.29563	0.00218307	0.0611876	-1.73918	-5.61891	2.11056e-06	0.000256115
2020-09-12	0.332378	1.82364	0.0763549	0.458986	0.59114	3.29518	0.00218576	0.0612228	0.641534	3.1884	0.00292234	0.0176845
NUDT19P5	0.179262	0.782413	0.438989	0.693494	0.742952	3.29452	0.0021897	0.0612931	0.650772	2.57291	0.0142635	0.0488623
IRF1	-0.349394	-1.2082	0.234693	0.550014	-0.937143	-3.29241	0.0022024	0.0613157	-2.05091	-6.42421	1.73371e-07	0.000113931
MCL1	-0.373774	-1.78968	0.0817557	0.460293	-0.677138	-3.29402	0.00219271	0.0613157	-1.20328	-5.21893	7.30008e-06	0.000424503
DDX39A	-0.294985	-1.82918	0.0755027	0.458879	-0.52254	-3.292	0.00220487	0.0613157	-0.864535	-4.85609	2.23425e-05	0.000797349
CD80	-0.223884	-0.770612	0.445867	0.698855	-0.941405	-3.2921	0.00220429	0.0613157	-1.29998	-4.05318	0.000251645	0.0035842
NHLH2	0.271357	1.49214	0.144206	0.491685	0.5894	3.29277	0.00220026	0.0613157	0.768775	3.82926	0.000484238	0.0054319
TGM7	0.577623	2.85679	0.007005	0.365913	0.655337	3.29293	0.00219926	0.0613157	0.812317	3.63922	0.000835793	0.00772914
IQSEC1	-0.318998	-1.96539	0.0569674	0.450681	-0.526066	-3.29294	0.00219923	0.0613157	-0.650255	-3.62904	0.000860351	0.00787948
RP11-528I4.2	0.806914	2.97001	0.00522322	0.35047	0.880629	3.29311	0.00219817	0.0613157	0.878388	2.92863	0.00581832	0.0274892
PTH2R	0.479387	2.86077	0.0069338	0.36475	0.543241	3.29361	0.00219516	0.0613157	0.539407	2.91582	0.00601505	0.0280505
RP11-567M16.3	0.476377	1.33261	0.19087	0.519594	1.15846	3.29243	0.00220227	0.0613157	1.07463	2.72308	0.00983699	0.038466
BAK1	-0.381443	-1.87188	0.069205	0.456803	-0.660186	-3.29153	0.0022077	0.0613546	-1.07749	-4.78973	2.73824e-05	0.000900262
BMT2	-0.334598	-1.82561	0.0760512	0.458986	-0.593646	-3.29075	0.00221244	0.0614463	-0.846683	-4.18458	0.000170528	0.00277807
RP11-445O3.3	0.297596	1.23874	0.223301	0.542102	0.777948	3.28995	0.0022173	0.0615411	0.634159	2.39111	0.0220387	0.0649065
RP11-94C24.11	1.15049	2.92403	0.00588822	0.357259	1.27383	3.28923	0.00222169	0.0616231	1.38039	3.17796	0.00300589	0.0180264
RP11-209D14.4	0.68329	2.86401	0.00687631	0.363953	0.77231	3.28886	0.00222394	0.0616455	0.967285	3.67258	0.000759953	0.0072253
CISD3	-0.189909	-1.17292	0.24838	0.559339	-0.52398	-3.28793	0.00222959	0.0616622	-0.967175	-5.41099	4.02553e-06	0.000326634
MITD1	-0.27542	-1.66451	0.104521	0.474214	-0.535475	-3.28787	0.00222994	0.0616622	-0.887044	-4.85607	2.23441e-05	0.000797349
TIAM1	-0.400222	-2.55292	0.0149745	0.398091	-0.507371	-3.28811	0.00222851	0.0616622	-0.751224	-4.34064	0.00010697	0.0020794
PLK3	-0.37064	-2.26816	0.0292936	0.427393	-0.528812	-3.28781	0.00223032	0.0616622	-0.559164	-3.09962	0.00370867	0.0205521
MAPK12	0.191955	1.86711	0.0698859	0.456803	0.332657	3.28739	0.00223289	0.0616933	0.244791	2.15682	0.0376377	0.0926678
PARVG	-0.313444	-2.14019	0.0390507	0.440816	-0.473796	-3.28675	0.00223679	0.061761	-0.697339	-4.31303	0.000116204	0.00217638
SBNO2	-0.402754	-1.77853	0.0835979	0.460899	-0.732529	-3.28647	0.00223851	0.0617686	-1.37306	-5.49235	3.12716e-06	0.000293091
RAB7B	-0.493132	-2.60891	0.0130608	0.391063	-0.611321	-3.28586	0.00224224	0.0618316	-0.988826	-4.73875	3.20039e-05	0.00098775
CLLU1OS	-0.704592	-2.22972	0.0319665	0.430927	-1.02189	-3.28548	0.00224455	0.0618554	-0.893507	-2.56129	0.0146732	0.049735
ZYX	-0.368324	-2.204	0.0338737	0.434502	-0.540355	-3.28507	0.0022471	0.0618859	-0.774567	-4.19844	0.000163638	0.00270817
DIP2A-IT1	0.290537	1.2637	0.2143	0.536418	0.743333	3.28482	0.00224863	0.0618879	0.532989	2.09996	0.0426631	0.101062
TP53I3	-0.212719	-1.7695	0.0851152	0.461908	-0.388583	-3.28407	0.00225324	0.0618953	-0.572341	-4.31268	0.000116327	0.00217638
MTCYBP23	0.658783	2.401	0.0215324	0.416368	0.886963	3.28428	0.00225197	0.0618953	0.92383	3.04993	0.00423224	0.0222777
AC002128.5	0.0565235	0.336022	0.738767	0.873078	0.543807	3.28448	0.00225072	0.0618953	0.452876	2.43874	0.0196964	0.0603321
LINC01503	0.358411	1.59822	0.118564	0.479362	0.724508	3.28233	0.00226397	0.0620353	1.19996	4.84696	2.29772e-05	0.000809128
ASPHD2	-0.221148	-1.3995	0.170055	0.505645	-0.510537	-3.28246	0.0022632	0.0620353	-0.728276	-4.17477	0.000175579	0.00283436
RPA1	-0.269356	-1.8314	0.075164	0.458878	-0.475217	-3.2827	0.00226169	0.0620353	-0.673592	-4.14858	0.000189777	0.00297698
OCSTAMP	-0.717113	-1.25025	0.219118	0.538981	-1.85305	-3.28231	0.00226415	0.0620353	-2.58086	-4.07587	0.000235353	0.00342043
UBA7	-0.284668	-1.75527	0.0875537	0.463246	-0.523817	-3.28147	0.00226931	0.0620574	-0.948358	-5.29694	5.73343e-06	0.000383827
TBC1D1	-0.341084	-2.12739	0.0401696	0.442925	-0.517861	-3.28157	0.0022687	0.0620574	-0.740397	-4.18309	0.000171287	0.00278512
UBE2B	-0.470765	-2.97447	0.00516258	0.35047	-0.511245	-3.28185	0.002267	0.0620574	-0.50872	-2.9116	0.00608122	0.0282347
LCP1	-0.334516	-1.63938	0.109675	0.476197	-0.658638	-3.27939	0.00228226	0.0620711	-1.23268	-5.47219	3.32917e-06	0.000300012
RP4-545C24.5	0.848821	2.49622	0.017172	0.400271	1.09763	3.2795	0.00228159	0.0620711	1.67018	4.44914	7.71601e-05	0.00170507
TIGAR	-0.407304	-2.23501	0.0315863	0.430579	-0.588482	-3.28078	0.00227363	0.0620711	-0.892787	-4.43767	7.98781e-05	0.0017353
TFCP2	-0.267942	-1.6859	0.100296	0.471051	-0.513148	-3.28032	0.00227646	0.0620711	-0.77512	-4.41781	8.48096e-05	0.00179767
ANOS1	-0.368134	-1.31667	0.196108	0.523612	-0.902454	-3.27929	0.00228289	0.0620711	-1.33743	-4.33301	0.000109448	0.002104
SLC25A20P1	0.631066	2.03156	0.0494828	0.447062	1.0031	3.28082	0.00227335	0.0620711	1.22822	3.5816	0.000984277	0.00861369
METTL17	-0.330618	-2.61055	0.0130083	0.391063	-0.408902	-3.28026	0.00227684	0.0620711	-0.460958	-3.29697	0.00217511	0.0145786
NCR3LG1	-0.336583	-2.29449	0.0275806	0.425091	-0.47352	-3.27956	0.00228119	0.0620711	-0.494839	-3.05566	0.00416848	0.0220777
SGMS2	-0.536901	-2.29875	0.027312	0.425091	-0.754034	-3.27999	0.00227851	0.0620711	-0.75153	-2.91469	0.00603275	0.0280916
TP53BP2	-0.296117	-2.20771	0.0335929	0.433642	-0.432835	-3.27857	0.00228741	0.0621543	-0.528534	-3.56943	0.00101874	0.00882847
BST1	-0.223731	-1.43072	0.160967	0.501145	-0.504504	-3.27774	0.00229257	0.0621984	-1.07389	-6.22065	3.2559e-07	0.000142593
STARD13-IT1	0.589885	2.12418	0.0404541	0.442925	0.895854	3.27752	0.00229396	0.0621984	1.04792	3.41823	0.00155649	0.0116734
RP11-106M3.2	0.239989	1.27726	0.209528	0.532258	0.606116	3.27738	0.00229485	0.0621984	0.673263	3.24578	0.00250133	0.0159707
RPL5P6	0.792361	2.10753	0.0419613	0.443248	1.21304	3.27801	0.00229089	0.0621984	1.25867	3.03255	0.00443133	0.0229547
GTF2I	-0.339505	-2.10147	0.0425219	0.443452	-0.521112	-3.27712	0.00229647	0.0622027	-0.799416	-4.48227	6.98104e-05	0.00160035
HOMER1	-0.537332	-2.0015	0.0527688	0.449167	-0.865888	-3.27687	0.00229804	0.0622059	-1.15797	-3.90714	0.000386149	0.00468591
BANK1	-0.214123	-1.10374	0.276885	0.580245	-0.625525	-3.27592	0.002304	0.0622365	-0.940179	-4.38998	9.22242e-05	0.00189574
AGGF1P3	0.773583	2.92358	0.0058951	0.357259	0.853251	3.27619	0.00230232	0.0622365	1.23391	4.22416	0.000151569	0.00258247
CSRNP2	-0.323407	-2.44305	0.0194959	0.410232	-0.426821	-3.27576	0.002305	0.0622365	-0.544628	-3.72676	0.000650768	0.0065483
TRAV8-5	0.159792	0.571239	0.571317	0.777742	0.901932	3.27582	0.00230466	0.0622365	0.436651	1.41398	0.16579	0.263026
RPS19BP1	-0.293434	-1.96428	0.0571009	0.450681	-0.481458	-3.27442	0.00231347	0.0623651	-0.864054	-5.23939	6.85209e-06	0.000410576
RP11-769N21.2	1.28736	3.53276	0.00112976	0.300832	1.17458	3.27476	0.00231133	0.0623651	1.67612	4.16645	0.000179972	0.00287705
AP001610.5	-0.602071	-1.96841	0.0566051	0.450643	-0.985654	-3.27398	0.00231623	0.0623651	-1.28386	-3.80218	0.000523701	0.00572706
SLC26A4-AS1	0.178037	1.05738	0.297246	0.595454	0.542585	3.27394	0.0023165	0.0623651	0.442053	2.37816	0.022718	0.066162
GSDMA	0.236313	1.34951	0.185435	0.516236	0.564269	3.27385	0.00231706	0.0623651	0.445861	2.3064	0.0268355	0.0735501
ATP5G3	-0.321758	-1.7217	0.0935397	0.466277	-0.601596	-3.27052	0.00233822	0.06239	-1.19961	-5.81452	1.14908e-06	0.000199524
PSMA5	-0.298526	-1.48834	0.1452	0.491685	-0.646197	-3.27317	0.00232137	0.06239	-1.1951	-5.39724	4.201e-06	0.000330509
THOC6	-0.216033	-1.28431	0.207076	0.530928	-0.541494	-3.27061	0.00233766	0.06239	-0.937232	-5.04715	1.2412e-05	0.000561628
RABEP2	-0.338735	-2.37035	0.0231368	0.420012	-0.459827	-3.26912	0.0023472	0.06239	-0.761983	-4.82998	2.42056e-05	0.000838823
EFR3A	-0.396517	-2.12006	0.0408223	0.442925	-0.602462	-3.27266	0.00232463	0.06239	-0.997597	-4.83158	2.40865e-05	0.000838823
RGS12	-0.172031	-1.62622	0.112456	0.477006	-0.34072	-3.27231	0.00232683	0.06239	-0.552824	-4.73377	3.24943e-05	0.000994979
TOMM20P2	-0.561794	-2.12505	0.040377	0.442925	-0.850749	-3.26946	0.00234498	0.06239	-1.30452	-4.46981	7.24904e-05	0.00163926
LRP10	-0.298458	-2.09976	0.0426818	0.443452	-0.457816	-3.27235	0.0023266	0.06239	-0.675185	-4.30284	0.000119807	0.00222406
CFLAR	-0.31148	-1.81128	0.0782837	0.459234	-0.553723	-3.27139	0.0023327	0.06239	-0.796151	-4.19371	0.000165958	0.00273491
RAB11FIP4	-0.333722	-2.5908	0.0136535	0.393591	-0.414608	-3.27017	0.00234046	0.06239	-0.580673	-4.08346	0.000230137	0.00337268
RP5-1024N4.4	0.80838	3.1923	0.00289171	0.328535	0.815301	3.27107	0.00233471	0.06239	0.97888	3.50159	0.0012332	0.0100069
RP11-436D23.1	0.449053	2.64819	0.0118551	0.385769	0.545953	3.27108	0.00233465	0.06239	0.648053	3.46187	0.00137826	0.0107687
ZBBX	0.584792	2.61868	0.0127507	0.390147	0.718666	3.26958	0.00234424	0.06239	0.800697	3.24786	0.00248724	0.0159169
RP11-1217F2.9	0.749418	2.76502	0.00885085	0.365913	0.873079	3.27274	0.0023241	0.06239	0.966006	3.2285	0.00262161	0.016497
GSG1L	0.486463	2.13761	0.0392732	0.441525	0.732885	3.27189	0.00232949	0.06239	0.79164	3.15105	0.0032317	0.0189047
RP11-541F9.1	0.434185	1.24387	0.22143	0.540746	1.12359	3.27034	0.00233939	0.06239	1.15267	2.99125	0.00494036	0.0246015
GPR149	0.567497	2.18915	0.0350205	0.43571	0.835022	3.27261	0.00232491	0.06239	0.720113	2.51629	0.0163624	0.0534056
LINC01508	0.539761	2.18782	0.0351253	0.43571	0.794064	3.27001	0.00234151	0.06239	0.681611	2.50261	0.0169101	0.0545609
FER1L6-AS1	0.390741	1.36475	0.180636	0.512912	0.921543	3.27013	0.00234076	0.06239	0.680587	2.15326	0.0379366	0.0931781
TMEM144	0.211838	1.67681	0.102074	0.471872	0.406505	3.26912	0.0023472	0.06239	-0.0346231	-0.248253	0.805322	0.853031
EXO5	-0.340062	-2.95524	0.00542878	0.352943	-0.370217	-3.26869	0.00234993	0.0624236	-0.607721	-4.78395	2.78714e-05	0.000907937
BAG1	-0.296851	-2.03531	0.0490857	0.447062	-0.469084	-3.26758	0.00235706	0.0625353	-0.574198	-3.56616	0.00102819	0.00886959
AC013275.2	0.634604	2.20506	0.0337934	0.434392	0.925651	3.26775	0.00235598	0.0625353	0.945941	2.97735	0.00512383	0.0252148
IPPK	-0.403758	-2.91615	0.00600996	0.357259	-0.445188	-3.26674	0.00236247	0.0626399	-0.705843	-4.61789	4.62666e-05	0.00123749
SPAG1	-0.235879	-1.97365	0.0559818	0.450118	-0.38424	-3.26639	0.00236474	0.0626613	-0.18371	-1.39239	0.172178	0.270539
SCTR	0.442567	2.46161	0.0186539	0.407625	0.577932	3.26589	0.002368	0.0627086	0.929878	4.68505	3.77064e-05	0.001089
PPFIA3	0.389812	2.72802	0.00971586	0.369887	0.459283	3.26555	0.00237019	0.0627279	0.695238	4.4073	8.75375e-05	0.00183448
IBA57-AS1	0.300162	1.68116	0.101219	0.471821	0.573746	3.26481	0.00237495	0.0628148	0.385492	1.95577	0.0581333	0.124807
PPIAP17	1.02548	2.93186	0.00576962	0.35534	1.12379	3.26429	0.00237835	0.0628657	1.30153	3.37071	0.00177561	0.0127557
RELA	-0.270113	-2.03049	0.0495967	0.447062	-0.42731	-3.26349	0.00238355	0.0629254	-0.507351	-3.45471	0.00140611	0.0109164
PKDREJ	0.449261	2.72832	0.00970839	0.369887	0.528968	3.2637	0.00238216	0.0629254	0.526249	2.89492	0.00634959	0.0290513
NDUFB3	-0.396308	-1.98888	0.0542047	0.449781	-0.639734	-3.26181	0.00239447	0.0631746	-1.13657	-5.16678	8.57821e-06	0.000464887
OGDH	-0.289358	-1.85645	0.0714264	0.457569	-0.500367	-3.26152	0.00239633	0.0631848	-0.887394	-5.15718	8.83644e-06	0.00046888
WSCD1	0.310809	1.85726	0.0713093	0.457423	0.537096	3.26072	0.00240157	0.0632743	0.714279	3.86628	0.000434913	0.00505918
RP11-60L3.6	0.621912	2.24575	0.0308268	0.429556	0.888743	3.26055	0.00240269	0.0632743	1.14926	3.75921	0.000592801	0.00616845
PSMB6	-0.309482	-1.53468	0.133435	0.486014	-0.647122	-3.26026	0.00240461	0.0632859	-1.20973	-5.43399	3.74821e-06	0.000313931
DNAJA1	-0.38469	-1.69111	0.0992872	0.470054	-0.729756	-3.25929	0.00241095	0.0632928	-1.38281	-5.50646	2.99303e-06	0.0002898
STIP1	-0.339705	-1.71274	0.0951934	0.467236	-0.636231	-3.25903	0.0024127	0.0632928	-1.17593	-5.37053	4.56392e-06	0.000346883
GRK3	-0.285555	-1.46483	0.151478	0.496194	-0.625277	-3.25877	0.00241441	0.0632928	-1.09076	-5.06845	1.16224e-05	0.000543164
AGAP3	-0.231799	-1.7007	0.0974557	0.468389	-0.437217	-3.25909	0.0024123	0.0632928	-0.642355	-4.26912	0.00013253	0.00237358
CNNM1	0.564309	3.56962	0.00101818	0.300832	0.507046	3.25864	0.00241525	0.0632928	0.697984	3.99943	0.000294762	0.00396185
FGF14	0.538216	2.92275	0.0059078	0.357259	0.590713	3.25908	0.00241233	0.0632928	0.715276	3.51849	0.00117603	0.00969775
TMPRSS12	0.449329	1.68722	0.10004	0.470721	0.854406	3.25953	0.00240943	0.0632928	0.926447	3.15119	0.00323044	0.0188999
TALDO1	-0.329085	-1.69441	0.0986544	0.469567	-0.622834	-3.25811	0.00241874	0.0633454	-1.28466	-5.99163	6.62728e-07	0.000183734
GAPT	-0.223871	-0.922869	0.3621	0.642116	-0.777814	-3.25763	0.0024219	0.0633893	-1.46636	-5.47557	3.29434e-06	0.000298764
CASP7	-0.260944	-1.26563	0.213616	0.535903	-0.660598	-3.25523	0.00243779	0.0635717	-1.24031	-5.44928	3.5745e-06	0.000306534
CTD-2541J13.1	0.499399	2.39483	0.0218472	0.416969	0.668149	3.25525	0.00243769	0.0635717	0.601323	2.61206	0.0129602	0.0459744
RP11-8P13.1	0.995213	3.25572	0.00243453	0.324742	0.979525	3.2556	0.00243536	0.0635717	0.840432	2.49047	0.0174102	0.0556458
RP11-646E18.4	0.473784	2.07204	0.0453396	0.44458	0.732811	3.25607	0.00243224	0.0635717	0.51492	2.03988	0.0486046	0.110463
MTCO2P20	0.685903	2.60167	0.0132948	0.391646	0.84496	3.25619	0.00243145	0.0635717	0.555414	1.90833	0.0641897	0.133521
RP11-46I1.1	0.231869	0.959306	0.343679	0.628846	0.774514	3.25557	0.00243556	0.0635717	0.35959	1.34763	0.186035	0.286339
STARD10	-0.271529	-1.76027	0.0866906	0.462606	-0.494145	-3.25463	0.00244181	0.0636374	-0.689175	-4.04706	0.000256225	0.00362406
VMP1	-0.433009	-1.90902	0.0640983	0.455813	-0.726412	-3.25372	0.00244787	0.0636883	-1.341	-5.35537	4.78354e-06	0.000354737
PACRG-AS3	0.420856	2.14272	0.0388325	0.440514	0.628978	3.2535	0.00244932	0.0636883	0.852413	3.93124	0.000359929	0.00449674
CFAP70	0.0925636	0.84004	0.406322	0.672404	0.352882	3.25367	0.00244819	0.0636883	0.396103	3.25623	0.00243116	0.0157148
LBHD1	-0.264275	-2.06169	0.0463685	0.445745	-0.410479	-3.25344	0.00244972	0.0636883	-0.345026	-2.43819	0.0197222	0.0603677
RHOBTB1	0.394994	1.53999	0.132137	0.485355	0.821198	3.25281	0.00245392	0.0637586	0.868369	3.06676	0.00404763	0.0216852
LINC00907	0.306404	1.80686	0.0789843	0.459234	0.542871	3.25245	0.00245633	0.0637825	0.450864	2.40837	0.0211623	0.0632441
CHCHD3	-0.250986	-1.58319	0.121955	0.480581	-0.507381	-3.25163	0.00246182	0.0637921	-0.782259	-4.46973	7.25077e-05	0.00163926
SMURF1	-0.297273	-2.20615	0.0337106	0.434373	-0.431299	-3.25193	0.00245978	0.0637921	-0.514767	-3.46049	0.00138356	0.0107884
LINC00911	0.490649	1.64175	0.109179	0.476197	0.956451	3.2515	0.00246267	0.0637921	1.07844	3.26876	0.00234952	0.0153619
PROS1	0.44116	2.63679	0.0121941	0.386905	0.535461	3.25155	0.00246235	0.0637921	0.536294	2.90355	0.0062093	0.0286209
CEP135	-0.366893	-2.53237	0.0157392	0.399907	-0.463506	-3.25033	0.00247055	0.0638799	-0.679583	-4.24892	0.000140777	0.0024554
SLC36A4	-0.285641	-2.04258	0.048323	0.44684	-0.447422	-3.25057	0.00246891	0.0638799	-0.558721	-3.61911	0.000884962	0.00804109
LINC00997	0.522065	2.0908	0.0435253	0.444359	0.798873	3.25049	0.00246947	0.0638799	0.769408	2.79121	0.00828258	0.0344993
SAMD9L	-0.570622	-1.72944	0.0921305	0.465633	-1.05543	-3.24991	0.00247341	0.0639151	-2.05726	-5.64798	1.92827e-06	0.000245868
PNO1	-0.148034	-0.919316	0.36393	0.643191	-0.514967	-3.24912	0.0024787	0.063982	-0.852663	-4.79654	2.68171e-05	0.000892309
NDE1	-0.338195	-2.45193	0.0190887	0.408708	-0.441098	-3.24908	0.00247899	0.063982	-0.654442	-4.29794	0.00012158	0.00224591
EIF2AK2	-0.504471	-1.97492	0.0558321	0.450094	-0.816699	-3.24832	0.00248409	0.0640749	-1.31196	-4.65244	4.16475e-05	0.00115969
SRP68	-0.263223	-2.05454	0.0470915	0.44684	-0.409517	-3.24749	0.00248976	0.0641436	-0.629725	-4.45236	7.64136e-05	0.00169383
RP11-274E7.2	-0.587106	-1.89196	0.0664019	0.455988	-0.99194	-3.24762	0.00248886	0.0641436	-1.38172	-4.03333	0.0002668	0.00372187
UQCRC1	-0.341337	-1.97662	0.0556316	0.449984	-0.551795	-3.2464	0.00249715	0.0642231	-1.07416	-5.63453	2.0106e-06	0.000249334
SEC24A	-0.23545	-1.61141	0.115653	0.478295	-0.466903	-3.24653	0.00249627	0.0642231	-0.749139	-4.64428	4.26952e-05	0.00117964
PPP1R15B	-0.353106	-2.17104	0.0364663	0.436685	-0.519698	-3.24637	0.00249736	0.0642231	-0.696294	-3.87796	0.000420403	0.00494017
MFSD5	-0.249593	-1.8012	0.0798878	0.459579	-0.442693	-3.24576	0.00250147	0.0642901	-0.756054	-4.94232	1.71426e-05	0.000666892
FLJ42102	0.444113	2.17472	0.0361681	0.436685	0.652285	3.24512	0.00250583	0.0643636	0.715714	3.17466	0.0030327	0.0181431
SHE	0.260291	1.82762	0.0757416	0.458986	0.45485	3.24474	0.00250845	0.064392	0.68225	4.33929	0.000107404	0.00208446
RP4-775C13.1	0.613128	2.93549	0.00571544	0.355211	0.666965	3.24427	0.00251166	0.0643972	0.900729	3.90635	0.000387043	0.00469541
RP11-552E4.3	1.12942	3.19326	0.00288424	0.328535	1.12943	3.24431	0.00251137	0.0643972	0.976836	2.50178	0.0169441	0.0546322
TBC1D3P7	0.788186	2.62755	0.0124751	0.388834	0.957723	3.24375	0.00251523	0.0644114	1.13133	3.41634	0.00156468	0.0117193
RP11-500G22.4	1.16861	3.24685	0.00249407	0.324742	1.14919	3.24391	0.00251409	0.0644114	0.994971	2.5041	0.0168499	0.054441
RHEB	-0.359771	-1.84498	0.0731179	0.458225	-0.622399	-3.24278	0.00252183	0.0645416	-0.934947	-4.3431	0.000106182	0.00207198
UBC	-0.327573	-2.00241	0.0526675	0.449167	-0.522079	-3.24238	0.00252459	0.0645737	-0.957608	-5.30248	5.63589e-06	0.000381144
TMEM102	-0.278896	-2.54573	0.015238	0.399057	-0.349475	-3.24094	0.00253452	0.0647567	-0.467013	-3.86142	0.000441105	0.00510456
RP11-319E16.2	0.601098	2.80488	0.00799953	0.365913	0.683617	3.2409	0.00253478	0.0647567	0.900796	3.80752	0.000515669	0.0056566
LIMD2	-0.320073	-1.91649	0.0631111	0.455813	-0.532451	-3.23908	0.00254735	0.0647693	-0.919658	-4.98806	1.48911e-05	0.000624213
SPPL2A	-0.391983	-1.80985	0.0785101	0.459234	-0.690414	-3.23868	0.00255009	0.0647693	-1.17691	-4.92229	1.82315e-05	0.000695319
KDM5C	-0.288944	-2.06669	0.0458693	0.444595	-0.445866	-3.24003	0.00254077	0.0647693	-0.647233	-4.19342	0.000166101	0.00273516
NIPA2P4	0.708401	2.38695	0.0222548	0.417669	0.946082	3.23875	0.00254965	0.0647693	1.30239	3.97516	0.000316522	0.00414561
UBP1	-0.313435	-2.0746	0.0450887	0.44458	-0.481607	-3.23863	0.00255044	0.0647693	-0.652282	-3.91082	0.000382027	0.00465704
TEX30	-0.498203	-2.87662	0.00665665	0.363804	-0.552337	-3.24014	0.00254004	0.0647693	-0.72894	-3.81255	0.000508236	0.00561207
AK4	-0.404142	-1.28948	0.205295	0.529612	-0.999137	-3.23883	0.00254908	0.0647693	-1.10408	-3.191	0.00290186	0.0176102
OR2AG2	0.465222	2.00889	0.0519436	0.449099	0.738359	3.23927	0.002546	0.0647693	0.795226	3.11053	0.00360221	0.020206
TMPRSS11B	0.783777	2.89308	0.00637976	0.360711	0.8638	3.23941	0.00254509	0.0647693	0.929577	3.10815	0.00362526	0.0202793
FOXD1	0.781706	3.58637	0.000971079	0.300832	0.694892	3.23901	0.00254782	0.0647693	0.7151	2.97184	0.00519819	0.0254512
TCEB1	-0.418309	-2.36579	0.0233842	0.421277	-0.563541	-3.23809	0.00255423	0.0647897	-1.01851	-5.21783	7.32504e-06	0.000424503
NAA25	-0.370111	-2.71639	0.0100034	0.372436	-0.434125	-3.23712	0.00256096	0.0647897	-0.70566	-4.69142	3.69808e-05	0.00107605
TUBA3FP	0.303139	2.11469	0.0413075	0.443248	0.456735	3.23707	0.00256127	0.0647897	0.694587	4.38914	9.24583e-05	0.00189905
CLRN3	0.85794	2.90082	0.00625344	0.360705	0.942606	3.23801	0.0025548	0.0647897	1.27593	3.90786	0.000385336	0.00468535
LGI2	0.464016	2.50575	0.0167831	0.400271	0.590007	3.23702	0.00256166	0.0647897	0.655342	3.20568	0.00278895	0.0171808
AC105052.1	0.614235	2.20072	0.0341245	0.434502	0.889258	3.23699	0.00256186	0.0647897	0.792039	2.57054	0.0143463	0.0490673
CH17-472G23.4	-0.365414	-2.09941	0.0427143	0.443452	-0.554663	-3.23761	0.00255755	0.0647897	-0.444809	-2.3149	0.0263149	0.0726954
OAS3	-0.628836	-1.65309	0.106838	0.475244	-1.21177	-3.2364	0.00256597	0.0648552	-2.14959	-5.11874	9.95098e-06	0.000495403
PSMA1	-0.281942	-1.46119	0.152469	0.496795	-0.614483	-3.23549	0.0025723	0.0648617	-1.11406	-5.23001	7.05414e-06	0.000416766
TLN1	-0.303453	-1.72248	0.0933957	0.466214	-0.561044	-3.23552	0.0025721	0.0648617	-0.966078	-4.96734	1.58724e-05	0.000640828
RP11-1072C15.6	0.567526	2.81684	0.00775929	0.365913	0.641696	3.23586	0.00256972	0.0648617	0.702058	3.15644	0.00318518	0.0187352
ILF2P1	0.769447	2.53584	0.0156078	0.399725	0.966466	3.23604	0.00256852	0.0648617	0.999833	2.98482	0.00502448	0.0248874
RP11-90D11.1	0.358288	1.56461	0.126253	0.482481	0.729194	3.2352	0.00257438	0.064876	0.870832	3.44474	0.00144577	0.0111292
IGHV3-47	0.124112	0.331809	0.74192	0.874332	1.19099	3.23495	0.00257611	0.0648812	0.947883	2.2955	0.0275165	0.0748404
RP11-703H8.7	1.18874	5.56091	2.52731e-06	0.0948454	0.680524	3.23434	0.00258036	0.06495	0.906514	3.84132	0.000467594	0.00531204
RP11-2O17.2	0.29678	1.43149	0.160747	0.501039	0.659877	3.2337	0.00258484	0.0650245	0.627765	2.74283	0.00936066	0.0373229
ANXA2	-0.297736	-1.47258	0.149385	0.494223	-0.643381	-3.23296	0.0025901	0.0650368	-1.34879	-6.04285	5.65276e-07	0.000170656
RNF31	-0.192037	-1.40008	0.169882	0.505645	-0.436495	-3.23319	0.00258848	0.0650368	-0.717055	-4.73552	3.23208e-05	0.000991798
LRRFIP1	-0.392851	-2.48081	0.017818	0.40358	-0.503844	-3.23255	0.00259294	0.0650368	-0.736787	-4.21459	0.000155956	0.0026258
AC007796.1	0.428222	1.42599	0.162318	0.501841	0.9555	3.23267	0.00259208	0.0650368	1.14738	3.46101	0.00138158	0.0107808
TMEM31	0.46765	1.37078	0.178766	0.511692	1.08551	3.23267	0.00259209	0.0650368	0.533878	1.41754	0.164755	0.261917
C8orf4	1.10359	2.98961	0.00496169	0.350046	1.17441	3.23229	0.00259482	0.0650456	1.17549	2.88452	0.00652243	0.0295572
AC009505.4	0.449702	1.73841	0.0905178	0.464372	0.822888	3.23187	0.00259779	0.0650818	0.615356	2.15478	0.0378089	0.0929286
PTMS	-0.198319	-1.53977	0.132191	0.485355	-0.409611	-3.23106	0.00260345	0.065158	-0.724024	-5.09203	1.08068e-05	0.000514619
PMPCA	-0.256341	-2.019	0.0508336	0.448873	-0.403744	-3.23079	0.0026054	0.065158	-0.5679	-4.05171	0.000252743	0.00359505
RP5-1011O1.3	0.656711	2.49399	0.0172639	0.400558	0.837386	3.23095	0.00260425	0.065158	0.927921	3.19212	0.00289312	0.0175852
NCEH1	-0.344418	-1.98456	0.0547035	0.449984	-0.551805	-3.23034	0.00260855	0.0651986	-0.707341	-3.69195	0.000719025	0.00698502
FLII	-0.268498	-1.78397	0.0826951	0.460297	-0.478445	-3.22969	0.0026132	0.0652123	-0.822646	-4.95115	1.66834e-05	0.000656197
DUSP5	-0.443044	-1.43759	0.159017	0.499904	-0.979448	-3.2289	0.00261883	0.0652123	-1.67178	-4.91377	1.87156e-05	0.00070435
CFAP77	0.783927	3.43241	0.00149628	0.307213	0.725738	3.2284	0.00262236	0.0652123	0.921008	3.65287	0.000803906	0.00750575
MTND2P41	1.60399	3.91845	0.000373625	0.280409	1.30097	3.22895	0.00261842	0.0652123	1.35973	3.00893	0.00471607	0.0238653
BTG4	0.529639	2.18246	0.0355489	0.43571	0.771081	3.22812	0.00262435	0.0652123	0.763926	2.85144	0.00710188	0.0312449
GAGE1	0.971659	2.82234	0.00765114	0.365913	1.09391	3.22821	0.00262369	0.0652123	0.993771	2.61475	0.0128747	0.0457676
RP11-13N12.2	0.717886	1.74551	0.0892601	0.464196	1.30701	3.2287	0.00262022	0.0652123	1.16832	2.57321	0.0142529	0.0488379
MTND4P10	0.436559	1.27762	0.209401	0.532224	1.08618	3.22957	0.00261402	0.0652123	0.86597	2.29568	0.0275058	0.0748273
PIP5K1C	-0.169276	-1.53008	0.134567	0.486314	-0.351518	-3.22812	0.00262437	0.0652123	-0.25964	-2.12587	0.0403039	0.0972612
TSPAN15	0.212792	1.69001	0.0994999	0.470389	0.400303	3.23004	0.00261072	0.0652123	0.250931	1.80524	0.0792411	0.154548
ZDHHC5	-0.299974	-2.13755	0.0392788	0.441525	-0.445792	-3.22737	0.00262967	0.065268	-0.647935	-4.18227	0.000171707	0.00278983
RP11-540H22.2	0.829537	2.46184	0.0186437	0.407625	1.07042	3.22748	0.0026289	0.065268	1.03812	2.79075	0.00829217	0.0345258
JAK2	-0.504901	-2.38372	0.0224239	0.419403	-0.672783	-3.22707	0.00263183	0.0652838	-1.09296	-4.67413	3.89831e-05	0.00111233
LRRC3C	0.712762	2.92748	0.00583577	0.356911	0.773182	3.22637	0.00263682	0.0653695	1.20389	4.47904	7.04966e-05	0.0016103
ACP2	-0.304102	-1.34593	0.186575	0.516966	-0.717207	-3.22503	0.00264648	0.0653702	-1.47212	-5.90194	8.75716e-07	0.000186173
ESRRA	-0.318505	-1.84279	0.0734444	0.458537	-0.54869	-3.2253	0.00264449	0.0653702	-0.913364	-4.78686	2.76237e-05	0.000904233
RAP1A	-0.393248	-2.30068	0.027191	0.425091	-0.542558	-3.22493	0.0026472	0.0653702	-0.824106	-4.36738	9.87124e-05	0.0019833
PSMC1P8	0.721165	2.8382	0.00734705	0.365913	0.806775	3.22585	0.00264054	0.0653702	1.04282	3.71762	0.000668046	0.00666719
KRT19	0.44989	1.89344	0.0661997	0.455988	0.754436	3.2259	0.0026402	0.0653702	0.846936	3.22882	0.00261939	0.0164883
RP11-7I15.4	1.14823	3.17516	0.0030286	0.328535	1.14786	3.22488	0.00264756	0.0653702	1.20881	3.02793	0.00448575	0.0231403
RS1	0.561318	2.57058	0.0143446	0.395692	0.693216	3.22534	0.00264423	0.0653702	0.494653	2.05197	0.0473542	0.108481
HEXDC	-0.337819	-2.14133	0.0389517	0.440613	-0.50045	-3.22289	0.00266189	0.065686	-0.646244	-3.71061	0.000681621	0.0067475
KLK13	0.399181	1.47993	0.147422	0.492471	0.855575	3.22264	0.00266365	0.0656883	0.804279	2.701	0.0103962	0.0398632
ZC3HAV1L	0.285707	1.75865	0.0869695	0.462606	0.51528	3.22245	0.00266506	0.0656883	0.453846	2.53055	0.0158087	0.0522411
ATP6V1B2	-0.290925	-1.34496	0.186886	0.517152	-0.685934	-3.22177	0.00266994	0.065728	-1.33351	-5.58433	2.34997e-06	0.000268393
RP11-905K4.1	0.50477	2.18323	0.0354872	0.43571	0.733184	3.22184	0.00266947	0.065728	0.93634	3.66849	0.000768871	0.00728211
LGALS9DP	0.456515	2.01842	0.0508969	0.448873	0.717183	3.22159	0.00267128	0.065728	0.573552	2.29708	0.027417	0.0746695
ITGAL	-0.301909	-1.71336	0.0950776	0.467236	-0.558279	-3.21891	0.00269079	0.0657911	-1.15574	-5.94132	7.74849e-07	0.000184321
SPG21	-0.261044	-1.43601	0.159465	0.500139	-0.575952	-3.21894	0.00269056	0.0657911	-1.05362	-5.25016	6.62734e-06	0.000406394
RP11-408O19.5	0.839821	3.47933	0.00131257	0.301693	0.765128	3.22053	0.00267897	0.0657911	1.3681	5.13422	9.48644e-06	0.000484351
DAPK1	-0.227612	-1.04511	0.302805	0.599504	-0.69011	-3.21935	0.00268752	0.0657911	-1.19536	-4.9718	1.56556e-05	0.000640547
GSE1	-0.205911	-1.86333	0.070429	0.456803	-0.350226	-3.2199	0.00268357	0.0657911	-0.542971	-4.45075	7.67855e-05	0.00169855
RCN1	-0.230188	-1.10193	0.277662	0.580819	-0.661958	-3.21949	0.00268655	0.0657911	-1.0018	-4.34411	0.000105859	0.00207041
TICAM1	-0.292101	-2.00049	0.0528831	0.449167	-0.462664	-3.21923	0.00268841	0.0657911	-0.528262	-3.27718	0.00229611	0.0151356
RFWD2P1	0.426975	1.98152	0.0550576	0.449984	0.682776	3.21928	0.00268806	0.0657911	0.743749	3.12658	0.00345084	0.0197008
AC116609.1	0.297055	1.06358	0.294466	0.592664	0.884936	3.21905	0.00268974	0.0657911	0.913218	2.96179	0.00533669	0.0259218
RP11-150O12.6	0.547457	2.18076	0.035684	0.43571	0.795477	3.21936	0.00268747	0.0657911	0.770041	2.77856	0.00855265	0.035202
RBMY2FP	0.724998	2.09433	0.0431908	0.443591	1.09686	3.21916	0.00268894	0.0657911	0.929331	2.43179	0.0200232	0.0609808
C1orf158	0.51534	2.49419	0.0172558	0.400558	0.65452	3.21841	0.00269437	0.065841	0.665474	2.91752	0.00598858	0.0279871
NFE2L2	-0.341153	-1.99962	0.0529814	0.449167	-0.540221	-3.21701	0.00270463	0.0659031	-0.758203	-4.0256	0.000272946	0.00377469
CFAP65	0.500946	2.65673	0.0116071	0.385465	0.597157	3.21758	0.00270044	0.0659031	0.708596	3.40411	0.00161874	0.0120155
RP3-416J7.4	0.472316	2.44342	0.0194787	0.410232	0.612101	3.21716	0.00270356	0.0659031	0.653011	3.06009	0.0041199	0.0219068
VCAM1	-0.138869	-0.471583	0.640014	0.817259	-0.932474	-3.21717	0.00270346	0.0659031	-0.966864	-2.97418	0.00516653	0.0253548
AP000619.6	0.729313	2.01183	0.0516184	0.448873	1.14804	3.2175	0.00270109	0.0659031	1.03206	2.57889	0.0140569	0.0484427
BCOR	-0.236708	-1.58131	0.122384	0.48101	-0.473811	-3.21583	0.00271333	0.0659743	-0.798929	-4.83459	2.38655e-05	0.000834217
PIK3CB	-0.2681	-1.5437	0.131235	0.484914	-0.54964	-3.21535	0.00271682	0.0659743	-0.610848	-3.18601	0.00294125	0.0177602
RP11-692C24.2	0.775809	2.32939	0.0254486	0.425091	1.0542	3.21583	0.00271333	0.0659743	0.98079	2.66754	0.0113	0.0420318
RP11-1275H24.3	0.163643	0.724255	0.473499	0.717778	0.715099	3.21547	0.00271597	0.0659743	0.569105	2.28157	0.0284096	0.0765721
CTC-297N7.9	0.396751	1.59844	0.118515	0.4793	0.785571	3.2155	0.00271574	0.0659743	0.508875	1.85711	0.0713304	0.143816
MRPS33P4	0.209684	0.681127	0.500064	0.734763	0.974289	3.2154	0.0027165	0.0659743	0.614419	1.8079	0.0788181	0.154027
SMAD7	-0.377972	-2.21612	0.032963	0.431377	-0.539699	-3.21491	0.0027201	0.0660165	-0.94749	-5.03217	1.29987e-05	0.000578976
CHCHD4P4	1.01668	2.60843	0.0130762	0.391063	1.23324	3.21458	0.00272251	0.0660376	0.834017	1.93828	0.0603061	0.127942
AK6	-0.423704	-2.31464	0.0263311	0.425091	-0.57912	-3.2142	0.00272532	0.0660682	-0.724397	-3.58464	0.000975846	0.00855919
RRP1	-0.255963	-1.83366	0.0748201	0.458878	-0.441457	-3.21303	0.00273401	0.0660913	-0.764102	-4.95839	1.63154e-05	0.000650491
KDM4A	-0.206151	-1.74732	0.0889409	0.463894	-0.373189	-3.21366	0.0027293	0.0660913	-0.619554	-4.75681	3.02849e-05	0.000958946
RTN4	-0.334927	-2.13161	0.0397975	0.442603	-0.496947	-3.2133	0.00273201	0.0660913	-0.812495	-4.68408	3.78172e-05	0.00109072
MAFG	-0.288756	-1.91047	0.0639059	0.455813	-0.478025	-3.21324	0.0027324	0.0660913	-0.742807	-4.45177	7.65498e-05	0.00169484
EDN1	-0.518078	-1.75355	0.0878527	0.46344	-0.934354	-3.21305	0.00273382	0.0660913	-0.715837	-2.19475	0.0345847	0.0875168
RP11-698E18.1	0.451087	1.59587	0.11909	0.479636	0.893766	3.21251	0.00273782	0.0661458	0.807004	2.58619	0.0138084	0.0479299
JAK3	-0.260044	-1.21501	0.232116	0.548588	-0.676547	-3.21157	0.00274481	0.0662773	-1.27831	-5.41027	4.03455e-06	0.000326634
HMGA1	-0.397469	-1.82189	0.0766251	0.458986	-0.689582	-3.21136	0.00274642	0.0662787	-1.09965	-4.56585	5.41932e-05	0.00136008
RP11-1396O13.13	0.468917	1.57417	0.124026	0.481206	0.941383	3.21075	0.00275094	0.0663502	1.06439	3.23673	0.00256368	0.0162354
TBC1D4	-0.358233	-2.01265	0.0515288	0.448873	-0.562312	-3.20969	0.0027588	0.0663938	-0.846491	-4.30797	0.000117982	0.00219975
UBXN4	-0.348573	-1.97928	0.0553194	0.449984	-0.556273	-3.20911	0.00276317	0.0663938	-0.793925	-4.08357	0.000230061	0.00337268
AC022201.4	0.712733	2.57243	0.0142802	0.395576	0.875257	3.20949	0.00276031	0.0663938	1.20616	3.94337	0.000347389	0.00439015
PTK7	0.1815	1.68768	0.09995	0.47053	0.339687	3.20906	0.00276355	0.0663938	0.43313	3.64822	0.000814639	0.00757781
CTD-2560E9.3	0.306657	1.1351	0.26369	0.570717	0.853322	3.20905	0.00276362	0.0663938	1.02178	3.42599	0.00152326	0.0115222
CBLN3	-0.403272	-2.18345	0.0354699	0.43571	-0.583521	-3.20986	0.00275755	0.0663938	-0.523141	-2.56574	0.014515	0.0494305
KRT8P1	0.692374	2.26933	0.0292158	0.42725	0.963716	3.20915	0.00276288	0.0663938	0.841644	2.49881	0.0170654	0.0549197
SRD5A3P1	-0.270991	-1.16552	0.251325	0.561675	-0.734339	-3.20881	0.0027654	0.0663992	-0.380683	-1.48312	0.146576	0.240484
DNPEP	-0.2167	-1.33236	0.190953	0.519752	-0.513565	-3.20805	0.00277114	0.0664346	-0.954594	-5.31653	5.39577e-06	0.000374666
TNIP2	-0.399004	-1.99145	0.0539102	0.449781	-0.632542	-3.20748	0.00277538	0.0664346	-1.00777	-4.55616	5.58112e-05	0.00138603
TRMT6	-0.293963	-1.86308	0.0704651	0.456803	-0.498208	-3.20799	0.00277159	0.0664346	-0.628216	-3.60657	0.000917042	0.00823795
MED12	-0.280775	-1.71477	0.0948164	0.467236	-0.516887	-3.20721	0.00277744	0.0664346	-0.610405	-3.37686	0.00174568	0.0126213
HEXIM1	-0.433839	-2.8294	0.00751447	0.365913	-0.484217	-3.2084	0.00276846	0.0664346	-0.549794	-3.24798	0.00248643	0.0159169
DDAH1	0.271274	1.88579	0.0672523	0.456791	0.454172	3.20768	0.00277391	0.0664346	0.451736	2.84459	0.00722785	0.031625
AC104389.28	0.672937	3.12068	0.00350576	0.338581	0.68071	3.20716	0.00277776	0.0664346	0.664442	2.79113	0.00828423	0.0345028
CSNK2B	-0.308477	-2.08766	0.0438242	0.44439	-0.466324	-3.20634	0.00278397	0.0665184	-0.738791	-4.52905	6.05929e-05	0.00146559
DNAJA4	-0.253628	-2.0809	0.044475	0.444502	-0.384628	-3.20611	0.00278568	0.0665184	-0.45024	-3.34615	0.00190015	0.0133615
NPM1P26	-0.136679	-0.739723	0.464171	0.711312	-0.583072	-3.20608	0.00278594	0.0665184	-0.473051	-2.31912	0.02606	0.0722076
GPR174	-0.378831	-1.66835	0.103753	0.473545	-0.716393	-3.20536	0.00279139	0.0666112	-1.18918	-4.74393	3.15013e-05	0.000982175
PAG1	-0.339149	-2.00032	0.0529016	0.449167	-0.534744	-3.20435	0.00279899	0.0667335	-0.728268	-3.89089	0.00040487	0.00482534
SH3PXD2A-AS1	0.420376	1.85955	0.0709754	0.457214	0.712976	3.20427	0.00279963	0.0667335	0.601348	2.40959	0.0211014	0.0631373
IL4I1	-0.378565	-0.760211	0.451982	0.702974	-1.57014	-3.20344	0.0028059	0.0668083	-3.06051	-5.56717	2.47869e-06	0.000274176
ARHGEF10L	-0.3217	-1.47313	0.149237	0.494181	-0.688536	-3.20331	0.00280687	0.0668083	-1.21535	-5.04123	1.26404e-05	0.000568757
EYA1	0.562264	2.88373	0.00653572	0.361878	0.614739	3.20324	0.00280747	0.0668083	0.602427	2.79877	0.00812494	0.0340753
ACTG1	-0.284332	-1.39307	0.171975	0.506544	-0.642931	-3.20034	0.00282958	0.0668134	-1.29879	-5.76415	1.34385e-06	0.000207981
ATP6V0B	-0.362676	-1.83922	0.0739799	0.458542	-0.621543	-3.20235	0.00281418	0.0668134	-1.12386	-5.16267	8.68787e-06	0.000464887
RP11-563J2.3	0.545683	3.18909	0.00291687	0.328535	0.539027	3.20053	0.00282812	0.0668134	0.894128	4.73341	3.25306e-05	0.000995374
DHRS4	-0.385413	-1.78671	0.0822434	0.460293	-0.679852	-3.20203	0.00281667	0.0668134	-1.07996	-4.53506	5.94993e-05	0.00144898
BCL3	-0.353244	-1.62776	0.112127	0.476923	-0.683917	-3.20187	0.00281786	0.0668134	-1.05703	-4.41217	8.6263e-05	0.00181514
SELENOI	-0.321749	-1.78142	0.0831174	0.460679	-0.568995	-3.20066	0.00282708	0.0668134	-0.848385	-4.25489	0.000138286	0.00242882
WBSCR27	0.199196	1.16118	0.253063	0.562502	0.54069	3.20221	0.00281525	0.0668134	0.752446	3.97321	0.000318335	0.00416019
RBM19	-0.282303	-1.9418	0.0598627	0.454752	-0.458038	-3.20092	0.00282507	0.0668134	-0.626073	-3.90088	0.000393261	0.00474792
C3orf30	0.539128	2.30873	0.0266921	0.425091	0.735754	3.20109	0.0028238	0.0668134	0.929715	3.60644	0.000917376	0.00823922
RP11-166A12.1	0.409087	2.33855	0.0249141	0.425091	0.551423	3.20258	0.00281243	0.0668134	0.656052	3.39717	0.00165018	0.0121544
DNAJA1P6	0.99003	2.21856	0.032782	0.430927	1.40579	3.20057	0.00282776	0.0668134	1.627	3.30261	0.00214174	0.0144342
BRSK2	0.228285	1.58345	0.121894	0.480581	0.454141	3.20039	0.0028292	0.0668134	0.497642	3.12674	0.00344936	0.0196978
RP11-244B22.10	0.362158	1.59725	0.118781	0.479617	0.714338	3.20083	0.00282582	0.0668134	0.68352	2.7307	0.00965064	0.0380494
RP11-390P2.2	0.522652	1.61433	0.115018	0.477867	1.02052	3.20245	0.00281342	0.0668134	0.915853	2.56243	0.0146322	0.0496674
ENO1	-0.309305	-1.4495	0.155686	0.497989	-0.671353	-3.19643	0.0028596	0.0668273	-1.3721	-5.82457	1.11376e-06	0.0001957
SFT2D2	-0.330685	-1.88355	0.0675646	0.456803	-0.55232	-3.19622	0.00286127	0.0668273	-1.04075	-5.36975	4.57503e-06	0.000347109
BLOC1S1	-0.254413	-1.72742	0.092496	0.465633	-0.463571	-3.19786	0.00284862	0.0668273	-0.85588	-5.26404	6.34859e-06	0.000397625
SEH1L	-0.269416	-1.80183	0.0797876	0.459502	-0.470881	-3.19952	0.00283581	0.0668273	-0.81553	-4.94058	1.72346e-05	0.000668643
PIP5K1A	-0.224435	-1.62091	0.113595	0.477278	-0.435566	-3.19599	0.00286302	0.0668273	-0.748172	-4.89459	1.98514e-05	0.000730968
TRPC4AP	-0.291161	-1.85089	0.0722426	0.457884	-0.494937	-3.19654	0.00285878	0.0668273	-0.832315	-4.79272	2.7133e-05	0.000896264
FAR1	-0.39463	-1.99665	0.0533166	0.449602	-0.621762	-3.1961	0.00286213	0.0668273	-0.940969	-4.31256	0.000116368	0.00217638
ITGAV	-0.562678	-2.75333	0.00911611	0.367865	-0.643223	-3.19774	0.0028495	0.0668273	-0.911326	-4.03942	0.000262058	0.00367372
ATG4B	-0.259747	-2.10959	0.041772	0.443248	-0.387485	-3.19733	0.00285268	0.0668273	-0.536805	-3.94924	0.000341481	0.00435352
PTS	-0.266956	-2.39895	0.0216367	0.416879	-0.350141	-3.19675	0.00285717	0.0668273	-0.479022	-3.89928	0.000395095	0.0047578
KRT16P4	1.32422	3.31855	0.00205006	0.320558	1.25601	3.19791	0.0028482	0.0668273	1.70978	3.88128	0.000416362	0.0049116
LINC00364	0.425997	1.3389	0.188833	0.518351	1.00152	3.19804	0.00284718	0.0668273	1.32451	3.77091	0.000573164	0.00605306
CYP2S1	-0.166547	-1.09569	0.280348	0.58233	-0.478705	-3.19966	0.00283478	0.0668273	-0.621327	-3.70271	0.00069721	0.00684314
RP11-68I3.10	0.632172	2.31378	0.0263834	0.425091	0.860447	3.19959	0.0028353	0.0668273	1.06509	3.53119	0.00113477	0.00947443
RAMP1	-0.829421	-3.09226	0.00378219	0.338618	-0.844621	-3.19924	0.00283799	0.0668273	-1.00577	-3.39664	0.00165263	0.0121669
AP000705.6	0.916593	2.20697	0.0336489	0.434102	1.30689	3.19699	0.00285527	0.0668273	1.52478	3.32564	0.00201052	0.0138694
TEX33	0.729459	2.81939	0.0077091	0.365913	0.814008	3.19644	0.00285957	0.0668273	0.895013	3.13351	0.00338743	0.0194705
DLX6	0.425759	2.10279	0.0423991	0.443452	0.637348	3.19811	0.00284664	0.0668273	0.6743	3.01671	0.00462043	0.0235359
ASB10	0.323032	1.25895	0.215994	0.537396	0.807223	3.19624	0.00286106	0.0668273	0.762786	2.69285	0.0106099	0.0403385
RP11-180P8.1	0.90975	2.84766	0.00717111	0.365913	1.00521	3.19675	0.00285717	0.0668273	0.646029	1.83175	0.0751106	0.148981
SLC46A1	0.46008	2.23379	0.0316738	0.430866	0.648111	3.19699	0.00285526	0.0668273	0.336013	1.47779	0.147991	0.242209
HSBP1	-0.278159	-1.65675	0.106092	0.475244	-0.52798	-3.19495	0.00287106	0.0669054	-0.921305	-4.97066	1.57107e-05	0.000640828
AOC4P	0.346731	1.64951	0.107573	0.475373	0.661092	3.19528	0.00286856	0.0669054	0.789025	3.40017	0.00163653	0.0120926
AC073316.1	0.627341	2.2141	0.0331128	0.432371	0.89107	3.19514	0.00286962	0.0669054	0.970567	3.1029	0.00367641	0.0204559
TAX1BP3	-0.47265	-2.09392	0.0432297	0.443614	-0.709767	-3.19463	0.00287359	0.0669277	-1.07197	-4.30183	0.000120172	0.00222669
CTSW	-0.303101	-1.40143	0.169482	0.505645	-0.679943	-3.19404	0.00287818	0.0669616	-1.18789	-4.97516	1.54947e-05	0.000638242
RP11-80H5.2	0.496291	2.09647	0.0429897	0.443452	0.744254	3.19416	0.0028772	0.0669616	0.920077	3.52066	0.00116888	0.0096649
CTD-3076O17.2	0.344347	1.86762	0.0698127	0.456803	0.579538	3.19344	0.00288286	0.0669625	0.777926	3.82189	0.000494679	0.00550919
NUDT18	-0.330291	-2.14087	0.0389914	0.440613	-0.48493	-3.19343	0.00288292	0.0669625	-0.6177	-3.62676	0.000865938	0.00791199
QSOX2	-0.237965	-1.9932	0.0537095	0.449602	-0.375284	-3.1936	0.00288154	0.0669625	-0.475196	-3.60544	0.000919995	0.00825753
PDHA1	-0.296059	-1.87276	0.0690808	0.456803	-0.496835	-3.193	0.00288625	0.0669669	-0.890309	-5.10142	1.04978e-05	0.000507831
RP13-122B23.8	1.36248	3.55895	0.00104934	0.300832	1.20324	3.19319	0.00288476	0.0669669	1.6432	3.88802	0.000408273	0.00484894
SCIMP	-0.338991	-1.64958	0.10756	0.475373	-0.645267	-3.19013	0.00290876	0.0674525	-1.21113	-5.33856	5.03958e-06	0.000366057
ATP6V1H	-0.333887	-1.92039	0.0626012	0.455813	-0.545848	-3.18967	0.00291236	0.0674995	-0.889031	-4.63185	4.43424e-05	0.00120582
UBE2L2	1.1904	3.33015	0.00198573	0.320558	1.12214	3.18932	0.00291507	0.0675256	1.24747	3.16117	0.00314494	0.0185928
PSME2P2	-0.321475	-1.07989	0.287234	0.587453	-0.934445	-3.1891	0.00291681	0.0675293	-1.12647	-3.42766	0.00151621	0.0114974
IGKJ4	-0.324037	-1.16343	0.252159	0.562276	-0.874107	-3.18856	0.00292109	0.0675917	-1.13526	-3.69222	0.000718471	0.00698123
EIF5A	-0.247979	-1.34821	0.185848	0.516541	-0.577084	-3.18762	0.00292851	0.0677108	-1.28945	-6.35034	2.17871e-07	0.000122452
XPNPEP1	-0.264872	-1.66223	0.104982	0.474631	-0.499935	-3.18751	0.00292941	0.0677108	-0.812588	-4.61926	4.60738e-05	0.00123333
CTNNBL1	-0.217412	-1.60899	0.116184	0.478727	-0.423896	-3.18723	0.00293162	0.0677254	-0.817901	-5.483	3.21928e-06	0.000295529
RP11-96O20.2	0.953415	3.45752	0.0013951	0.305599	0.864858	3.18648	0.00293754	0.0678255	0.928175	3.04902	0.00424251	0.0223088
FN3K	0.451207	3.30749	0.00211329	0.320558	0.427688	3.18517	0.00294794	0.0680287	0.689499	4.57829	5.21841e-05	0.00132445
ABHD2	-0.368361	-1.97538	0.0557776	0.449984	-0.584579	-3.18497	0.00294957	0.0680295	-1.16601	-5.66406	1.83426e-06	0.000239892
BAZ1A	-0.382839	-2.08811	0.0437815	0.44439	-0.57469	-3.1846	0.00295249	0.0680603	-1.05293	-5.20219	7.68824e-06	0.000434009
CYP2F2P	0.447897	2.36538	0.0234068	0.421277	0.593433	3.18403	0.00295699	0.0681271	0.886524	4.24092	0.000144176	0.00249432
CD38	-0.358524	-1.36221	0.18143	0.513812	-0.824424	-3.18243	0.00296979	0.0681972	-1.57285	-5.41329	3.99693e-06	0.000326634
RP11-517I3.1	0.392955	1.64055	0.109431	0.476197	0.749922	3.18087	0.00298238	0.0681972	1.42987	5.40742	4.07043e-06	0.00032776
UGP2	-0.231396	-1.21056	0.233798	0.549626	-0.598488	-3.18105	0.00298087	0.0681972	-1.01698	-4.81938	2.50045e-05	0.000854575
TEX261	-0.232314	-1.92027	0.062617	0.455813	-0.378798	-3.18111	0.00298043	0.0681972	-0.583349	-4.3678	9.85874e-05	0.00198181
GPR53P	0.547071	2.85837	0.00697676	0.365211	0.599478	3.18223	0.00297145	0.0681972	0.910152	4.3076	0.000118112	0.00220024
TOMM40	-0.320262	-1.78252	0.082934	0.460666	-0.562515	-3.18088	0.00298223	0.0681972	-0.829828	-4.18375	0.000170951	0.00278203
RP11-82L18.2	0.656896	2.17028	0.0365277	0.436686	0.947874	3.18166	0.00297597	0.0681972	1.08533	3.24811	0.00248554	0.0159169
LINC01387	0.506835	1.91235	0.0636562	0.455813	0.830149	3.1823	0.00297083	0.0681972	0.887917	3.03474	0.0044058	0.022868
APOBR	-0.300693	-2.08779	0.0438122	0.44439	-0.45106	-3.18186	0.00297438	0.0681972	-0.481806	-3.03028	0.00445796	0.0230507
RP3-333B15.5	1.10325	2.68107	0.0109261	0.379489	1.28897	3.18246	0.0029696	0.0681972	1.34211	2.95442	0.00544032	0.026255
RP11-793J2.1	0.184596	0.918879	0.364155	0.643399	0.629294	3.18254	0.00296896	0.0681972	0.552802	2.4926	0.0173216	0.0554725
CPLX4	0.302137	1.5562	0.128238	0.483016	0.607958	3.18141	0.00297799	0.0681972	0.510058	2.37974	0.0226339	0.0659892
RP11-398B16.2	0.945717	2.45324	0.0190296	0.408708	1.20774	3.18298	0.00296538	0.0681972	0.896139	2.10572	0.042128	0.100168
RN7SL652P	0.241958	0.706718	0.484202	0.724623	1.07249	3.18262	0.00296833	0.0681972	0.333146	0.881434	0.383817	0.490933
PNMAL1	0.491384	2.62261	0.0126279	0.389854	0.586554	3.18057	0.00298477	0.0682153	0.460244	2.2251	0.0323018	0.0835516
LINC01467	0.796327	2.53043	0.0158134	0.400229	0.98503	3.18006	0.00298886	0.0682723	0.802082	2.30871	0.0266935	0.0732965
PSMB8	-0.330192	-1.45864	0.153167	0.496795	-0.70841	-3.17942	0.002994	0.0683014	-1.5395	-6.16036	3.92525e-07	0.000152425
PSMA4	-0.307586	-1.51737	0.137735	0.488432	-0.633988	-3.17753	0.00300932	0.0683014	-1.21717	-5.43909	3.68944e-06	0.000313309
NUP93	-0.172887	-1.34908	0.185572	0.516351	-0.401008	-3.17915	0.00299618	0.0683014	-0.677678	-4.79011	2.73502e-05	0.000900048
JAG1	-0.255971	-1.13216	0.264905	0.571577	-0.707222	-3.17803	0.0030053	0.0683014	-1.01809	-4.07899	0.000233196	0.00340197
COX7BP2	0.946398	3.09843	0.00372049	0.338618	0.955436	3.178	0.00300555	0.0683014	1.28739	3.81792	0.000500397	0.00554682
CTD-2014N11.1	1.05029	3.03475	0.0044057	0.342633	1.08275	3.17853	0.00300121	0.0683014	1.44978	3.79458	0.000535324	0.00580217
AC003973.5	0.875518	3.00873	0.0047186	0.348216	0.910363	3.17845	0.00300184	0.0683014	0.962322	2.99561	0.00488414	0.0244262
ZSWIM5P3	0.347571	1.51112	0.139318	0.489436	0.719497	3.17809	0.00300478	0.0683014	0.739847	2.91369	0.00604838	0.0281373
RP11-665C16.5	0.553662	2.10101	0.0425652	0.443452	0.824186	3.17755	0.00300919	0.0683014	0.823788	2.83169	0.00747049	0.0323469
LINC01312	0.803627	3.04955	0.0042366	0.342022	0.824461	3.17859	0.00300072	0.0683014	0.750714	2.58049	0.014002	0.0483322
RP11-23I7.1	0.400536	1.37081	0.178755	0.511692	0.913889	3.17771	0.0030079	0.0683014	0.753782	2.33684	0.025013	0.0703702
EEPD1	0.150335	0.875783	0.386841	0.659829	0.536881	3.17759	0.00300882	0.0683014	0.247971	1.30853	0.198823	0.300681
MAP3K2	-0.461881	-2.48991	0.0174339	0.402236	-0.580093	-3.17713	0.0030126	0.0683202	-0.782161	-3.81941	0.000498237	0.00553503
DUSP14	-0.364388	-2.87086	0.00675608	0.363934	-0.396908	-3.17704	0.00301335	0.0683202	-0.256927	-1.83361	0.0748279	0.148621
RP11-439I14.2	1.42876	3.27157	0.00233151	0.321291	1.36537	3.17636	0.00301883	0.0683719	1.43375	2.97384	0.00517115	0.0253659
SPOCD1	-0.420817	-2.37786	0.022734	0.419403	-0.553317	-3.17651	0.00301762	0.0683719	-0.395666	-2.02521	0.0501619	0.112932
MPDU1	-0.269371	-1.60807	0.116385	0.478727	-0.523318	-3.17397	0.00303833	0.0686426	-1.01795	-5.50465	3.00992e-06	0.0002898
CPEB4	-0.407006	-2.45318	0.0190322	0.408708	-0.518379	-3.17438	0.00303498	0.0686426	-0.662101	-3.61493	0.00089554	0.00810718
RP11-307C18.1	0.135028	0.445754	0.658392	0.827567	0.94635	3.17399	0.00303819	0.0686426	1.20544	3.60466	0.000922027	0.00827403
HOXC-AS3	0.421763	2.28672	0.0280768	0.425091	0.576264	3.17431	0.00303555	0.0686426	0.670119	3.29112	0.0022102	0.0147444
MTCYBP19	0.213497	0.851775	0.39986	0.66818	0.783028	3.17391	0.00303882	0.0686426	0.694434	2.50965	0.0166264	0.0540034
HLA-C	-0.318277	-1.70134	0.0973336	0.468048	-0.584272	-3.17311	0.00304544	0.0686626	-1.27059	-6.15234	4.02408e-07	0.000152711
NCF1	-0.307586	-0.918949	0.364119	0.643379	-1.04542	-3.17322	0.00304454	0.0686626	-2.04295	-5.52881	2.79234e-06	0.000282243
DTX3L	-0.386768	-1.52183	0.136618	0.487767	-0.793648	-3.17268	0.0030489	0.0686626	-1.53384	-5.46693	3.38391e-06	0.000302351
CD34	0.409281	2.6369	0.0121909	0.386905	0.484804	3.17338	0.00304321	0.0686626	0.678463	3.95954	0.000331334	0.00427065
SIPA1L3	-0.152127	-1.38786	0.173545	0.507808	-0.342294	-3.17263	0.00304935	0.0686626	-0.467357	-3.86219	0.000440123	0.00509896
ZMIZ1	-0.298054	-1.87291	0.069059	0.456803	-0.497002	-3.17295	0.00304669	0.0686626	-0.646854	-3.68193	0.000739916	0.00710716
TMEM205	-0.217217	-1.21574	0.231843	0.548378	-0.557785	-3.17174	0.00305669	0.0686877	-1.11256	-5.64052	1.97349e-06	0.000247207
PCBP1	-0.363161	-1.86619	0.0700168	0.456803	-0.607524	-3.17179	0.00305628	0.0686877	-0.958316	-4.46081	7.44887e-05	0.00166586
AURKAPS1	-0.826608	-2.81618	0.0077724	0.365913	-0.916324	-3.17171	0.00305689	0.0686877	-1.13161	-3.49225	0.00126593	0.0101854
KARSP2	0.615026	2.05474	0.0470712	0.44684	0.934475	3.17187	0.00305559	0.0686877	0.775676	2.34743	0.024406	0.0692878
GLDCP1	0.820623	3.60746	0.000914737	0.300832	0.710089	3.17142	0.00305929	0.0687053	0.807142	3.21407	0.00272629	0.0169362
POLR3K	-0.333941	-2.36331	0.02352	0.421277	-0.440763	-3.16912	0.00307829	0.0690087	-0.750092	-4.80853	2.58503e-05	0.000872485
RP4-718D20.3	0.512783	2.62153	0.0126617	0.389854	0.610063	3.16869	0.00308192	0.0690087	0.938968	4.3483	0.000104538	0.00205115
PUDP	-0.217151	-1.59103	0.120177	0.480504	-0.425778	-3.16944	0.00307565	0.0690087	-0.533102	-3.53814	0.00111279	0.00935132
LINC00923	0.374029	1.89604	0.0658448	0.455988	0.61527	3.16878	0.00308115	0.0690087	0.552603	2.53748	0.0155457	0.0516316
SMIM22	0.752887	2.18211	0.0355764	0.43571	1.07607	3.16862	0.00308249	0.0690087	0.813645	2.13614	0.0394014	0.0956974
AC087501.1	-0.245251	-1.29609	0.203033	0.527817	-0.590284	-3.16933	0.00307661	0.0690087	0.0227225	0.108774	0.913974	0.937367
NRBP1	-0.332435	-2.39149	0.0220193	0.416969	-0.433489	-3.16827	0.00308538	0.069025	-0.774148	-5.04466	1.25076e-05	0.000565357
CLEC4E	-0.290693	-0.713758	0.479889	0.721974	-1.27	-3.16814	0.00308645	0.069025	-1.97223	-4.38655	9.31824e-05	0.00190716
CD274	-0.387502	-1.04644	0.302196	0.599236	-1.15462	-3.16785	0.00308889	0.0690433	-2.33848	-5.72036	1.53982e-06	0.000222315
AC004129.9	0.192882	0.720966	0.475496	0.718915	0.834075	3.16747	0.00309206	0.0690782	0.383949	1.3	0.201702	0.303829
PTPRO	-0.293008	-2.35901	0.023757	0.42186	-0.387138	-3.16664	0.00309896	0.0691346	-0.879579	-6.41464	1.78577e-07	0.000114675
RP11-170N16.3	0.717097	4.09294	0.000223777	0.224261	0.546048	3.16645	0.00310055	0.0691346	0.850775	4.39866	8.98453e-05	0.00186298
ZNF529-AS1	0.162926	1.50712	0.140335	0.489709	0.336938	3.16659	0.00309935	0.0691346	0.471454	3.95044	0.000340278	0.00434919
ACOT7	-0.299475	-1.36359	0.180999	0.513095	-0.684475	-3.16639	0.00310106	0.0691346	-0.711712	-2.93545	0.00571605	0.0271749
RPL17P50	-0.768355	-3.98245	0.000309828	0.264686	-0.601194	-3.16583	0.00310576	0.0692031	-0.472666	-2.21917	0.0327368	0.0842534
MYO1C	-0.308688	-2.04404	0.0481716	0.44684	-0.470516	-3.16539	0.00310938	0.0692212	-0.617368	-3.70307	0.000696499	0.00684073
BEST1	-0.29146	-2.03803	0.0487992	0.447062	-0.445536	-3.16517	0.00311123	0.0692212	-0.549198	-3.47863	0.00131517	0.0104393
CLCNKB	0.266331	1.3777	0.176635	0.51033	0.602249	3.16515	0.00311143	0.0692212	0.661158	3.09804	0.00372435	0.0206016
HSP90AB1	-0.316663	-1.42498	0.162607	0.50186	-0.692214	-3.16473	0.00311496	0.0692276	-1.29284	-5.26993	6.23389e-06	0.000395075
AC083899.1	0.909339	2.75821	0.00900439	0.366097	1.02699	3.16484	0.003114	0.0692276	1.26038	3.46298	0.00137399	0.0107451
CRYBB1	0.38653	1.58169	0.122297	0.48101	0.761038	3.16394	0.00312158	0.0692668	0.709313	2.6292	0.0124247	0.0446698
AE000659.41	1.22965	3.42547	0.00152547	0.307213	1.11799	3.16418	0.00311952	0.0692668	0.969991	2.44768	0.0192826	0.0596119
PHLDA2	-0.527814	-1.96139	0.0574497	0.451202	-0.838034	-3.16394	0.00312159	0.0692668	-0.563729	-1.89758	0.0656354	0.135683
PDZD4	0.539532	3.00044	0.00482265	0.348573	0.559852	3.16319	0.0031279	0.0693708	0.501856	2.5281	0.0159026	0.0524419
MMP9	-0.495889	-0.788713	0.435343	0.69116	-1.95737	-3.16294	0.00312997	0.0693807	-4.09022	-5.8929	9.00665e-07	0.000186173
OR7E18P	0.770611	3.20232	0.00281441	0.328535	0.749048	3.16245	0.00313413	0.0694369	0.779414	2.9339	0.00573908	0.0272565
HDGF	-0.229118	-1.29709	0.20269	0.527564	-0.549689	-3.16164	0.0031409	0.0695148	-0.984971	-5.05107	1.22626e-05	0.000556615
TSTA3	-0.207097	-1.4621	0.15222	0.496795	-0.440801	-3.16177	0.00313988	0.0695148	-0.555826	-3.55459	0.00106234	0.00905748
ERI1	-0.206757	-1.58031	0.122612	0.481095	-0.406997	-3.16052	0.00315043	0.0696896	-0.48903	-3.38584	0.00170283	0.0124102
RP11-63A11.1	0.422838	1.58067	0.122529	0.481095	0.8321	3.16029	0.00315233	0.0696956	0.69125	2.34073	0.0247887	0.0699562
AC002539.1	0.476213	1.72752	0.0924782	0.465633	0.8574	3.16002	0.0031547	0.0697118	0.809415	2.65975	0.0115207	0.0425002
ILF3	-0.325792	-1.98429	0.0547348	0.449984	-0.510562	-3.15935	0.00316031	0.0697618	-0.737725	-4.07013	0.000239378	0.00345815
RPL26P3	0.520352	1.3874	0.173683	0.507835	1.16633	3.15943	0.00315971	0.0697618	1.03352	2.49614	0.0171752	0.0551608
RP1-303A1.1	0.351357	1.02636	0.311438	0.606449	1.06449	3.15917	0.00316186	0.0697618	0.667745	1.76688	0.0855595	0.163235
RP11-615I2.2	0.439861	1.52543	0.135719	0.487173	0.896517	3.15878	0.00316518	0.0697629	1.19729	3.76118	0.000589447	0.00614703
CCL21	0.444422	1.72303	0.0932958	0.46619	0.80198	3.15896	0.00316363	0.0697629	0.762429	2.67759	0.0110211	0.0413576
IFITM1	-0.368138	-1.37778	0.176612	0.51033	-0.82982	-3.15526	0.00319528	0.0699914	-1.61804	-5.48536	3.19579e-06	0.000295001
GNB2	-0.243589	-1.7	0.0975879	0.468389	-0.444716	-3.15324	0.00321271	0.0699914	-0.843107	-5.32992	5.17628e-06	0.000367138
ADRM1	-0.346585	-1.93297	0.0609799	0.455124	-0.55627	-3.15198	0.00322356	0.0699914	-0.98773	-4.99	1.48026e-05	0.000621723
HIGD1A	-0.362206	-1.70344	0.0969364	0.468003	-0.659335	-3.15037	0.00323756	0.0699914	-1.15835	-4.9347	1.75489e-05	0.000675913
GSDMD	-0.296022	-1.61809	0.114203	0.477278	-0.567495	-3.15155	0.00322735	0.0699914	-0.990764	-4.90564	1.9189e-05	0.000716486
GXYLT1	-0.311617	-1.94786	0.0591079	0.453529	-0.496902	-3.15566	0.00319187	0.0699914	-0.797322	-4.51457	6.33095e-05	0.00150797
OAZ2	-0.21051	-1.36654	0.180081	0.512673	-0.478222	-3.15401	0.00320609	0.0699914	-0.756411	-4.44789	7.74519e-05	0.00170798
FBXO44	-0.209748	-1.74409	0.0895101	0.464253	-0.372912	-3.15038	0.00323752	0.0699914	-0.555305	-4.18265	0.000171512	0.00278773
PRAMEF11	0.749954	3.51776	0.00117846	0.300832	0.661606	3.15293	0.00321535	0.0699914	0.981399	4.16989	0.000178142	0.00286066
GALNT14	0.455508	2.548	0.0151545	0.399057	0.5553	3.15584	0.00319033	0.0699914	0.779117	3.94778	0.000342934	0.00436615
CLECL1	-0.273431	-1.45946	0.15294	0.496795	-0.581492	-3.15336	0.00321165	0.0699914	-0.812969	-3.93068	0.000360514	0.0045001
ECE1	-0.279386	-2.03871	0.048728	0.447062	-0.425536	-3.15479	0.00319935	0.0699914	-0.58892	-3.89273	0.000402714	0.00481172
AC090954.5	0.584759	1.58733	0.121013	0.48052	1.1446	3.15666	0.00318329	0.0699914	1.54348	3.79524	0.00053431	0.00579707
ALDOAP1	0.427591	1.3417	0.187932	0.517869	0.98826	3.15051	0.00323631	0.0699914	1.33011	3.78061	0.000557355	0.00595484
WARS2	-0.185194	-1.64545	0.108413	0.475901	-0.349035	-3.15071	0.00323462	0.0699914	-0.464674	-3.73983	0.000626782	0.00639432
ENTPD7	-0.308008	-2.02184	0.0505256	0.448631	-0.473246	-3.15613	0.0031878	0.0699914	-0.616408	-3.66522	0.000776091	0.00732775
LRRC37A12P	0.612651	1.97953	0.0552903	0.449984	0.960526	3.15313	0.00321368	0.0699914	1.22851	3.59564	0.000945902	0.00838827
SYMPK	-0.180515	-1.62173	0.113418	0.477278	-0.345559	-3.15407	0.00320557	0.0699914	-0.43391	-3.53112	0.00113498	0.00947443
GLIS1	0.385372	1.76369	0.0861046	0.462239	0.677537	3.15034	0.00323781	0.0699914	0.835028	3.4617	0.00137892	0.0107713
RP11-794P6.1	0.434954	2.02295	0.0504055	0.448147	0.667447	3.15385	0.00320741	0.0699914	0.8212	3.45969	0.00138666	0.0108066
LRRC3B	0.660564	2.30616	0.0268505	0.425091	0.888961	3.15312	0.0032137	0.0699914	1.05886	3.34857	0.00188751	0.0133177
CLEC4D	-0.30205	-1.07048	0.291388	0.590801	-0.875248	-3.15149	0.00322784	0.0699914	-1.03983	-3.33819	0.00194228	0.0135598
TWIST1	1.01413	3.3907	0.00168005	0.307213	0.928665	3.15456	0.00320129	0.0699914	1.07434	3.25377	0.00244752	0.0157662
RP11-822E23.2	0.781307	2.31067	0.0265728	0.425091	1.04875	3.15117	0.00323064	0.0699914	1.20571	3.23003	0.00261078	0.0164483
RP11-98L5.4	0.501971	1.59181	0.12	0.480504	0.979484	3.15569	0.0031916	0.0699914	1.10546	3.17546	0.00302622	0.0181144
RP11-1060G2.2	0.642867	2.68275	0.0108805	0.379489	0.743073	3.15046	0.00323678	0.0699914	0.835194	3.15714	0.0031792	0.0187232
RP3-510D11.4	0.691491	2.58034	0.0140071	0.394734	0.831383	3.15192	0.00322408	0.0699914	0.896124	3.02905	0.00447247	0.0231005
MTND4P29	0.604007	1.99879	0.0530743	0.449167	0.938422	3.15506	0.00319699	0.0699914	0.972735	2.91587	0.00601426	0.0280505
ONECUT3	0.559099	2.16281	0.0371407	0.438342	0.803154	3.15654	0.00318434	0.0699914	0.828739	2.90398	0.00620242	0.0285954
MTND6P2	0.964944	2.2273	0.0321417	0.430927	1.34355	3.15076	0.00323416	0.0699914	1.3836	2.8929	0.0063827	0.0291403
RP11-430C1.1	0.378037	1.93111	0.0612175	0.455397	0.607134	3.15094	0.00323265	0.0699914	0.574684	2.65919	0.0115367	0.0425197
RP11-519G16.3	-0.425504	-1.91043	0.0639104	0.455813	-0.691648	-3.15498	0.00319767	0.0699914	-0.630036	-2.56237	0.0146345	0.0496714
TMEM211	0.443238	1.49487	0.143493	0.491465	0.920427	3.15385	0.00320745	0.0699914	0.828851	2.53216	0.0157472	0.0520862
RP11-83C7.3	0.551716	1.94349	0.0596513	0.454595	0.880907	3.15269	0.00321747	0.0699914	0.741672	2.36661	0.0233396	0.0673232
RP11-190J23.1	-0.456528	-2.38347	0.0224375	0.419403	-0.594457	-3.15315	0.00321343	0.0699914	-0.488461	-2.31003	0.026612	0.0732055
FAR2	-0.408378	-2.87936	0.00660976	0.363336	-0.439957	-3.15157	0.00322712	0.0699914	-0.331472	-2.11704	0.0410948	0.0984446
KIAA0556	-0.170401	-1.80101	0.0799193	0.459579	-0.293647	-3.15321	0.00321295	0.0699914	-0.216607	-2.07379	0.0451678	0.104958
BIN2P2	0.388465	1.39558	0.171222	0.506212	0.864566	3.15563	0.00319214	0.0699914	0.523559	1.70379	0.0968695	0.17833
ADGRE5	-0.273857	-1.4676	0.150728	0.49518	-0.578529	-3.14987	0.00324191	0.0700091	-1.09315	-5.30655	5.56528e-06	0.000380353
PGLYRP3	0.547695	2.3449	0.02455	0.424845	0.72418	3.15003	0.0032405	0.0700091	0.904448	3.50765	0.00121241	0.00989453
MFSD10	-0.291388	-2.14985	0.0382242	0.440397	-0.420092	-3.14895	0.00324997	0.0700871	-0.638402	-4.26657	0.000133545	0.0023834
GXYLT1P6	0.892438	2.42355	0.0204175	0.412325	1.14132	3.14894	0.00325001	0.0700871	1.22245	3.00713	0.00473854	0.0239325
TP53I11	-0.204014	-1.71975	0.0938981	0.466572	-0.367679	-3.14889	0.00325044	0.0700871	-0.190325	-1.45328	0.154639	0.2503
RP11-1094M14.5	-0.421739	-1.63392	0.110821	0.476336	-0.799569	-3.14723	0.00326504	0.0702777	-1.18653	-4.16403	0.00018127	0.00289132
RP11-728G15.1	0.731112	3.07086	0.00400372	0.342022	0.737486	3.14713	0.00326586	0.0702777	0.987308	3.75645	0.000597535	0.00619808
CDA	-0.550098	-2.79488	0.00820553	0.365913	-0.609735	-3.14738	0.00326367	0.0702777	-0.619545	-2.85131	0.00710428	0.0312523
AC068490.2	0.283631	1.00515	0.321403	0.613438	0.874102	3.14719	0.00326535	0.0702777	0.128855	0.413644	0.681541	0.753679
CD300LF	-0.243672	-1.10513	0.276292	0.579676	-0.682903	-3.14666	0.00327001	0.0703166	-1.62953	-6.69447	7.53295e-08	0.000109602
TUBB4B	-0.245112	-1.25875	0.216066	0.537396	-0.603083	-3.14655	0.00327096	0.0703166	-1.1155	-5.18911	8.00582e-06	0.000446827
GTPBP4	-0.209074	-1.45718	0.153566	0.497012	-0.444277	-3.14594	0.00327632	0.0703963	-0.753161	-4.75497	3.0455e-05	0.000961174
ADAM19	-0.191935	-1.09019	0.282731	0.584157	-0.545016	-3.14515	0.00328329	0.0704106	-0.852051	-4.3839	9.39267e-05	0.0019169
DAB2IP	0.285247	1.57012	0.124965	0.48166	0.562361	3.14493	0.00328522	0.0704106	0.789799	3.93801	0.000352879	0.00444638
OTULIN	-0.368843	-2.22301	0.0324548	0.430927	-0.513611	-3.14498	0.00328481	0.0704106	-0.709872	-3.87549	0.000423424	0.00496747
RP3-448I9.1	0.551868	1.58323	0.121945	0.480581	1.07899	3.14494	0.00328517	0.0704106	1.467	3.81231	0.000508588	0.00561207
GCKR	0.39441	2.13426	0.0395653	0.442532	0.572108	3.1453	0.00328199	0.0704106	0.568219	2.78524	0.00840894	0.0348278
ACTN4	-0.236776	-1.41277	0.166143	0.503497	-0.518544	-3.14344	0.00329841	0.070535	-0.949486	-5.13181	9.55717e-06	0.000486009
RIT1	-0.438216	-2.34642	0.024463	0.424833	-0.577765	-3.14306	0.00330171	0.070535	-0.972281	-4.71583	3.43252e-05	0.00102675
ACLY	-0.231252	-1.45808	0.153319	0.496861	-0.490654	-3.14308	0.00330158	0.070535	-0.817567	-4.66947	3.9541e-05	0.0011178
AC008074.5	0.622445	2.06768	0.0457707	0.44458	0.931476	3.14368	0.00329628	0.070535	1.3203	3.97285	0.000318673	0.00416019
[truncated: 40,716 more rows]
