# Supplementary material for: Modeling gene x environment interactions in PTSD using glucocorticoid-induced transcriptomics in human neurons
Source: Research Square preprint supplement (doi:10.21203/rs.3.rs-267139/v1), 2021-02-25
Supplement: Supplementary file 8 [file a74b94dfb8aa49ef1cf8f78a.xlsx]

## Sheet: LogFold changes
Gene	IBD.beta_log2FC	AAD.beta_log2FC	ASD.log2FC	SCZ.log2FC	BD.log2FC	MDD.beta_log2FC	PTSD.OFC.log2FC	PTSD.dACC.log2FC	PTSD.sgPFC.log2FC	PTSD.dlPFC.log2FC
A1BG	-0.0430743	-0.0848065	0.0219642	0.0166642	0.0985497	NA	-0.0965796	0.113323	-0.11402	-0.0231144
A2M	0.236163	-0.462636	-0.197805	-0.223822	-0.144472	-0.0669743	-0.371481	-0.416089	-0.30719	-0.160278
A2ML1	0.0514874	-0.0923706	0.110472	0.0292441	-0.0552591	0.0794187	-0.10286	-0.12976	-0.107175	0.0265683
A4GALT	0.25823	0.0878384	0.152708	0.185463	-0.00252167	NA	0.163385	0.135831	0.0367544	0.39728
AAAS	-0.0252288	0.129209	-0.00625947	-0.0124528	0.0158485	-0.0275681	-0.0926626	0.0202322	-0.0811804	-0.0499926
AACS	-0.113624	0.268526	-0.0333461	0.00159956	0.040537	-0.016746	0.111957	0.217205	0.0989845	0.0431393
AADAT	-0.100232	-0.15943	0.076004	0.0375247	0.0374061	-0.00259262	-0.0452296	-0.0320871	0.0137853	0.0669204
AAED1	0.205148	0.0639767	-0.0118487	-0.0175499	-0.00874421	0.0249598	0.114504	0.00414945	-0.024722	0.0990454
AAGAB	NA	NA	-0.0745286	-0.0141983	0.0175179	-0.0287585	0.0668886	0.0222023	0.126253	0.0164172
AAK1	-0.00662019	-0.0978052	-0.0270173	-0.00531719	0.00699605	-0.0357982	0.047571	0.0888569	0.138385	0.0200367
AAMDC	-0.440345	-0.191589	0.0621698	-0.00022836	0.0280323	-0.0159954	-0.120052	-0.0616716	0.00753869	0.0707028
AAMP	-0.12108	0.185822	0.0167578	0.0327762	0.0195884	-0.0213159	0.0856455	0.0605132	-0.00324064	0.0146816
AANAT	-0.01579	-0.0347699	0.172144	-0.0251113	0.134445	0.00746707	-0.478136	NA	-0.0649461	-0.266279
AAR2	NA	0.160715	0.0314561	-0.0111853	0.00554661	-0.0127932	0.0393432	-0.0288676	-0.0159124	0.018149
AARD	0.0180951	-0.00985646	-0.0472081	-0.00770049	0.11605	NA	0.0598455	NA	0.0674606	-0.179418
AARS	0.230821	0.0592761	-0.0483682	0.0273894	0.0244037	-0.0142032	0.105441	0.0607119	0.0862524	0.010839
AARS2	-0.0559043	-0.203177	0.0470288	0.00523019	0.0131963	-0.0701853	-0.0497458	0.032759	-0.073924	0.0242119
AASDH	-0.0623347	-0.310807	-0.00265396	-0.000533145	-0.0174604	0.00513271	-0.123642	-0.146973	0.0545157	0.0066885
AASDHPPT	0.130846	-0.0697021	-0.0940771	0.00231192	0.024185	0.0112066	0.0941233	-0.0140229	0.202223	-0.0479994
AASS	0.0902841	-0.00696896	-0.0166394	0.0151527	-0.0173906	0.0103614	-0.146231	-0.0596662	-0.0579574	0.109652
AATF	-0.00921112	0.207336	0.0568433	0.0400125	-0.0149178	-0.00249851	0.0663595	-0.0678994	0.0423669	0.0486239
AATK	-0.112452	0.116852	-0.18165	-0.0432806	0.0101784	0.00485082	-0.0879317	0.0806546	-0.106061	-0.0839887
ABAT	-0.293571	-0.292524	-0.00969146	0.00252765	0.00594937	-0.00637046	0.0621215	-0.0201098	-0.00877048	-0.0052612
ABCA1	-0.0199431	-0.190059	0.409493	0.0530988	-0.0133066	0.0183484	-0.187129	-0.169355	-0.250876	-0.0480873
ABCA10	NA	0.105699	-0.220014	-0.0413725	0.0349177	NA	-0.103523	0.0320236	0.0479747	-0.00253665
ABCA2	-0.0855806	1.01219	-0.174466	-0.0181905	-0.0101346	-0.0100789	-0.139025	0.0568595	-0.118702	-0.0940842
ABCA3	0.108799	-0.050758	-0.04923	0.00774382	0.0338309	-0.0449912	0.081674	0.125606	0.0288849	-0.0016914
ABCA5	-0.218613	-0.17931	-0.0851719	-0.0266782	0.00179254	-0.00472114	0.0102973	0.055684	0.168608	0.0840664
ABCA6	-0.00182836	0.119395	-0.196552	-0.0346241	0.0206017	-0.0361641	-0.217705	-0.00507876	0.0236587	-0.00319975
ABCA7	0.141453	0.279575	-0.00818729	-0.0200201	0.0515393	-0.0454222	-0.192295	0.0867575	-0.214489	-0.117397
ABCA8	-0.576753	0.0674434	-0.313309	-0.105413	-0.203664	-0.103456	-0.465147	-0.164891	-0.206432	-0.122323
ABCA9	-0.263551	0.0368869	-0.15901	-0.0456404	-0.0384513	-0.0742893	-0.275305	-0.10484	-0.113862	0.0375282
ABCB1	-0.820724	-0.238264	-0.30278	-0.0998151	-0.134381	-0.0963059	-0.180155	-0.193131	-0.167095	0.0344606
ABCB10	-0.13942	-0.130957	-0.0810391	-0.0223826	-0.00772489	-0.0239121	-0.0618829	-0.0530886	-0.0583986	-0.0583318
ABCB6	0.166463	0.307554	0.056997	0.0343495	0.0158197	-0.0391494	-0.20061	-0.0334868	-0.238848	-0.138024
ABCB7	-0.181408	-0.0955544	0.0250515	0.0305175	0.0263239	-0.0205554	0.0517113	-0.00104128	0.0466717	0.0887243
ABCB8	0.00456823	0.128145	-0.0388748	-0.0408915	0.00617567	-0.0519043	-0.132457	0.0436721	-0.164616	-0.037113
ABCB9	-0.191144	0.175423	-0.139279	-0.0270589	0.0424241	0.00264486	-0.0574238	0.0610187	-0.0994805	-0.0841294
ABCC1	0.146768	0.0473517	0.0156967	-0.000388292	0.0403249	-0.0471818	0.00897359	0.032688	-0.0313308	-0.00815445
ABCC10	0.0185818	0.0269628	-0.0522954	-0.0521676	-0.0235153	-0.0184472	-0.231423	-0.00351135	-0.202497	-0.193173
ABCC12	-0.0260571	-0.289087	-0.412988	-0.14061	-0.0999396	-0.127567	-0.124295	-0.044537	-0.0623819	-0.254134
ABCC4	0.0265984	-0.0808241	0.0601344	0.0368814	-0.0122334	-0.0351344	-0.172748	-0.0518217	-0.000277725	0.0365648
ABCC5	-0.0337967	-0.0188279	-0.0100344	-0.00786658	-0.011743	-0.041286	-0.0457091	0.0858744	-0.0112624	-0.0111877
ABCC6	-0.169404	0.0832144	0.0601863	-0.0225519	0.0117083	0.0562564	-0.103687	0.0379725	-0.0975849	0.0532605
ABCC8	-0.0847078	-0.0104489	-0.131635	-0.013924	0.0249472	-0.0811022	-0.0941997	0.116462	-0.0872052	-0.0324585
ABCC9	1.04e-05	-0.147404	0.185784	0.116937	0.103072	-0.0211735	0.0847151	-0.0549544	0.0429508	0.28281
ABCD1	NA	-0.00287851	0.0572762	0.0357761	-0.0120675	0.0218686	-0.138648	-0.0237285	-0.132906	-0.0337334
ABCD2	0.0164593	-0.0601906	-0.0576007	-0.0510448	-0.0186981	-0.0250208	-0.0205872	-0.148955	-0.0408879	-0.0244245
ABCD3	-0.436133	-0.31341	0.0177773	0.00305603	-0.0116266	0.0243617	-0.0162366	-0.0753152	0.00920552	0.0583489
ABCD4	-0.0129105	-0.137005	0.0844233	0.0596429	0.0567514	-0.00402749	-0.143634	0.125857	-0.150773	0.00211626
ABCE1	0.0900273	-0.213981	-0.028698	-0.0142013	0.0171216	-0.0151366	0.0261476	0.0155366	0.189015	0.0433808
ABCF1	-0.0174587	-0.039406	-0.0186369	-0.0215215	-0.0249754	0.00887946	-0.022325	-0.0403582	-0.0173473	-0.0545269
ABCF2	-0.0820843	0.129001	-0.016659	0.00847826	0.0301108	-0.0385464	0.0847357	-0.00258288	0.0546839	-0.00176564
ABCF3	0.0401643	0.310148	-0.018906	0.0106901	0.0130882	-0.0173956	-0.0227644	0.0379476	-0.0198408	-0.057278
ABCG1	-0.616345	0.183121	0.062509	0.0115723	-0.0061714	-0.041454	0.0255286	0.0569515	-0.0187732	0.0385387
ABCG2	-0.946755	-0.447445	-0.456932	-0.343363	-0.243899	-0.100789	-0.475817	-0.485518	-0.373195	-0.256643
ABCG4	0.0424885	-0.0958248	-0.2033	-0.000783572	0.0264596	-0.0564336	0.00846954	0.13874	0.0140404	-0.0337698
ABCG5	0.0477768	0.00161298	0.0292169	-0.0161579	-0.142108	-0.016681	-0.0955475	0.106999	-0.0460977	0.150987
ABCG8	0.0832855	-0.0792297	-0.0886087	0.0539012	0.0194705	0.00229569	0.18479	0.337961	0.0152692	0.308122
ABHD1	-0.0237829	0.0179597	0.129169	0.034958	0.00979989	0.0484013	-0.112808	-0.0486088	-0.125005	-0.0526246
ABHD10	-0.0467923	0.148897	-0.0478743	0.00206585	0.00737722	0.0166231	0.0512622	0.0308735	0.15451	-0.0141984
ABHD11	-0.369627	-0.104984	-0.00917696	-0.0162268	0.050278	0.0035226	-0.177684	0.0443327	-0.166691	-0.120677
ABHD12	-0.153527	0.535303	-0.10032	-0.000192168	0.01905	0.0315714	0.111757	0.0615472	0.00827301	0.00644704
ABHD12B	-0.179997	-0.0939068	-0.12321	0.00031539	-0.0781044	-0.0304554	0.135817	0.164121	0.070484	0.0734441
ABHD13	0.0289545	0.0141893	0.0383206	0.0147763	0.0107321	-0.0133484	0.13495	0.0851474	0.228536	0.142303
ABHD14A	0.137987	0.294458	-0.0704309	0.012405	0.039576	-0.0273245	0.150057	0.0616217	0.0419933	-0.0650864
ABHD14B	-0.217257	0.121418	0.0321019	0.0114774	0.0447757	-0.0359011	-0.139074	-0.00612305	-0.137494	0.0129346
ABHD15	-0.191016	-0.0672533	0.0405499	0.0626935	0.0429042	0.000286286	0.0224875	-0.169675	-0.093638	-0.0481026
ABHD16A	NA	NA	-0.05746	-0.0185065	0.00654543	-0.0282954	-0.130074	-0.0424896	-0.0303788	-0.186287
ABHD17A	NA	0.088984	0.00388768	-0.00730492	0.0148007	NA	0.0518453	0.0500849	-0.139766	-0.0897841
ABHD17B	-0.0192841	0.0117726	-0.128123	-0.0418553	-0.0342507	NA	0.0105283	-0.0748814	0.0599112	0.0177501
ABHD17C	-0.215597	-0.169317	0.0870417	0.0195167	-0.0164855	0.0250445	0.0719049	-0.0174922	-0.0305736	-0.0437721
ABHD2	0.0857279	0.0360916	0.0996076	0.0217766	0.0273574	-0.0312788	0.0565452	0.0378228	0.0614103	0.0560269
ABHD3	-0.304104	-0.31504	0.3292	0.033243	-0.0144015	-0.0288267	-0.120376	-0.0733826	-0.136928	-0.159536
ABHD4	-0.0809561	0.17456	0.276981	0.0760868	0.0210249	-0.000486882	0.0410058	0.00243875	-0.03019	0.113155
ABHD5	-0.338852	-0.0942143	0.0693194	0.00763259	0.0112797	0.000504206	0.0453079	0.0239009	0.0340068	0.0339028
ABHD6	-0.144715	0.0269391	-0.0488906	-0.0678063	-0.0459824	-0.0219713	0.0509832	0.0439241	0.067612	0.026637
ABHD8	0.116333	-0.0591833	0.0237685	0.0294166	0.0415176	-0.0248646	0.180189	0.0969137	-0.0515195	0.0258417
ABI1	-0.0782499	-0.178412	0.0895005	0.036268	0.0334594	-0.00335466	0.0901388	-0.043992	0.0643016	0.052049
ABI2	0.186321	-0.0577464	-0.0192846	0.000691633	0.00958116	0.00454595	0.0777248	0.00859704	0.115823	0.0185919
ABI3	0.232267	0.175105	0.00103138	0.0150579	-0.0400875	0.0248811	-0.334448	-0.0736918	-0.177095	-0.163799
ABI3BP	0.246714	-0.143543	0.153422	0.0506864	0.0707241	-0.0539424	-0.0182336	0.0606295	-0.0305053	0.561264
ABL1	-0.182862	-0.00732371	0.0584887	-0.00409038	-0.0212831	-0.0160365	-0.0307849	-0.00249248	-0.0604091	0.0757975
ABL2	0.0268496	0.00500014	0.0198008	0.0353803	0.0270616	0.00619937	0.0372907	0.0702011	0.0971389	0.0364261
ABLIM1	0.00469127	-0.155191	0.0498544	-0.0122786	-0.031895	-0.0404551	-0.0558729	-0.135607	-0.0808734	-0.056816
ABLIM2	-0.480051	0.173989	-0.18498	-0.0388765	-0.00621688	-0.0737049	0.104958	0.07133	-0.0277577	-0.011513
ABLIM3	0.0506313	0.233519	-0.0136783	-0.0100644	-0.00510834	-0.010156	-0.0224101	0.00528797	6.4e-05	-0.00598379
ABO	-0.182363	0.0464781	-0.0507346	-0.0494281	-0.0725967	0.108968	-0.0557411	0.104965	-0.056716	0.231021
ABR	-0.408734	-0.039178	-0.0292147	-0.00508387	0.0149169	-0.0209504	0.0994913	0.0820507	0.0438947	-0.00679768
ABRA	-0.00393401	-0.0652947	-0.00331544	0.0181124	-0.0920762	-0.0098346	-0.137617	0.268924	0.234744	0.00672508
ABRACL	-0.258607	-0.139478	-0.110432	-0.00726854	0.0128937	-0.0599207	0.00369049	0.0257087	0.0585593	-0.0702635
ABT1	0.00300314	0.150353	-0.0574383	0.0127329	0.0468005	-0.045165	0.106264	-0.0125135	0.0239917	0.0305249
ABTB1	0.0863664	-0.0801695	-0.172541	0.000858446	0.0404672	-0.0147141	-0.0456682	0.0631329	-0.116826	-0.0776025
ABTB2	0.0420954	0.0200122	0.110908	-0.0821476	-0.0670365	-0.0145544	-0.236122	-0.0511967	-0.263499	-0.175231
ACAA1	-0.413774	0.123883	-0.0102625	0.0261017	0.0400901	-0.0544513	-0.0493747	-0.0124525	-0.0617688	-0.0872378
ACAA2	-0.510038	-0.18818	0.23191	0.0573537	0.0632607	0.0198989	-0.00283496	-0.171679	-0.103599	0.0648742
ACACA	0.066656	-0.238178	-0.032034	-0.0275733	-0.020897	-0.00545157	0.0295595	0.033039	0.0473001	0.00472729
ACACB	-0.332909	-0.105502	-0.0237086	0.037154	-0.0252903	0.0640741	-0.281929	-0.186564	-0.241271	-0.0572658
ACAD10	-0.356167	-0.0558253	0.0504619	0.00643557	0.00721704	-0.0247839	-0.159735	-0.0984947	-0.113547	-0.0506041
ACAD8	-0.163146	0.115543	-0.0441319	-0.00144816	0.0279998	-0.0594425	0.0739119	0.102142	0.0531881	0.0254152
ACAD9	-0.0414878	0.011141	-0.0545636	-0.00797076	-0.0270998	-0.0410165	-0.0612857	0.00767188	-0.0342785	-0.0197294
ACADL	0.00156145	-0.0639335	0.217749	0.0820636	0.0199815	-0.0655186	-0.17333	-0.171852	0.03024	0.141524
ACADM	-0.530404	-0.296982	0.0297299	-0.0169867	-0.0259732	0.0419161	-0.0378939	-0.139235	-0.000159704	0.00771884
ACADS	NA	NA	0.137284	0.0806104	0.100942	-0.0118122	0.0974875	-0.01147	-0.0529268	0.0626588
ACADSB	-0.181216	-0.175064	-0.0854591	-0.00755463	0.0376722	0.0242975	0.0924335	0.0357162	0.156759	0.0531571
ACADVL	-0.206277	0.538843	0.0651367	-0.0140929	0.00155286	-0.0501278	-0.119259	0.0840787	-0.126015	-0.0331826
ACAN	0.0145094	0.0615582	0.0501055	0.0440353	0.000126062	0.0503732	0.225024	0.131866	0.147181	0.181855
ACAP1	0.298818	0.144594	0.0112023	-0.000790233	0.0140109	-0.0701152	-0.182923	0.131926	-0.104697	0.0670751
ACAP2	-0.163264	-0.390364	0.0519709	0.0036426	-0.00405121	-0.00202635	-0.0132457	-0.0437545	0.0631701	0.0451719
ACAP3	0.00987141	0.476536	-0.00950556	-0.0575104	0.012659	-0.0512681	-0.185297	0.0774145	-0.241474	-0.144848
ACAT1	-0.597074	-0.250343	-0.0654994	-0.0121995	-0.00704363	0.0148444	0.0409711	-0.0585802	0.0527964	0.0669197
ACAT2	-0.114594	-0.479447	-0.188551	-0.103812	-0.053805	-0.0473162	0.0241668	0.00669294	0.0581496	-0.0452714
ACBD3	0.256603	-0.321835	0.0636851	0.0136184	-0.00443242	-0.0528771	0.0443021	-0.0657759	0.0408212	-0.00425013
ACBD4	NA	NA	-0.0296675	0.0760754	0.0546389	-0.0104385	-0.0786212	0.068304	-0.0938516	-0.00204356
ACBD5	-0.141221	-0.161393	0.0104667	-0.0252305	-0.0428817	0.0341079	-0.0166478	-0.119693	-0.0183275	-0.00775309
ACBD6	0.0373076	0.246471	-0.0863065	-0.0138824	0.0159376	0.0117909	-0.057102	0.0112822	-0.0527088	-0.067609
ACCS	-0.0330544	0.0861572	-0.0671774	-0.106075	0.0595631	-0.0245984	-0.118316	0.0230936	-0.0817921	-0.0387716
ACD	0.0613548	0.260215	0.0137988	0.00110116	0.0250476	-0.0115157	0.0071209	0.113146	-0.0491853	-0.0410483
ACE	0.0539646	-0.0295055	-0.0120723	-0.00752742	0.088619	-0.0349733	0.100359	0.220489	-0.0408071	0.0645306
ACER2	NA	0.0645718	-0.0019879	0.049137	0.0262497	NA	-0.147933	-0.12139	-0.179431	0.0344356
ACER3	0.0221819	-0.0876606	-0.12433	-0.0791076	-0.0458686	-0.0340207	-0.00847456	-0.0136974	0.0828919	0.0274856
ACHE	0.0257881	0.673083	-0.0242795	0.0260954	0.0360592	0.0192922	0.0693675	0.0693426	-0.0330595	-0.0829625
ACIN1	-0.0310086	0.273502	0.0124192	-0.00709347	-0.0263458	-0.0571154	-0.149255	-0.0668285	-0.0949903	-0.0706985
ACKR3	0.482122	-0.305325	0.270522	0.134736	-0.0274489	0.0123622	0.00557984	-0.15198	-0.138828	0.210395
ACKR4	NA	-0.0364904	-0.133985	0.0717921	-0.00781012	NA	0.0494748	0.0952992	0.0283069	0.292281
ACLY	NA	-0.110775	-0.118115	-0.000386153	0.0196963	-0.0512081	0.0650014	0.0255653	0.0504478	0.00876991
ACMSD	-0.0733146	-0.0801696	-0.0922011	-0.057101	0.00765972	0.0064521	-0.0578735	0.11159	0.213548	-0.033068
ACO1	0.0174493	-0.260587	0.11693	0.0690727	0.0707061	0.0386656	-0.00431992	0.0226601	0.0234871	0.0878016
ACO2	-0.357438	0.145882	0.0672431	0.0234711	0.0209922	-0.0281022	0.0614051	-0.0112221	-0.0106686	0.0132957
ACOT1	-0.209157	-0.276417	0.0951888	0.0482038	-0.0676164	-0.0668599	-0.119272	-0.295169	-0.136721	-0.3748
ACOT11	-0.513198	-0.341529	-0.0765766	0.0459896	-0.00726294	-0.00851353	-0.172065	-0.0820557	-0.125918	-0.00541438
ACOT13	-0.35976	-0.374892	0.0414415	0.0318909	0.00866948	-0.0271893	-0.0379263	-0.092277	-0.0141175	0.0164501
ACOT2	-0.268463	-0.300009	0.136457	0.0391664	0.0168047	NA	0.0637162	-0.051318	-0.0905871	-0.0847366
ACOT4	-0.486328	0.210282	-0.195646	-0.0068769	0.0524818	-0.0577586	-0.0714367	0.0310119	-0.0535816	-0.00580177
ACOT6	NA	0.0841723	-0.238732	0.40586	0.220096	NA	-0.182934	-0.00284052	-0.109071	-0.159482
ACOT7	-0.123404	-0.0342031	-0.101502	0.0154539	0.0264057	-0.0545883	0.13969	0.102736	0.070087	-0.058271
ACOT8	-0.374175	0.0735906	0.0209177	0.0187245	0.0405062	-0.0313564	-0.0158233	0.00894762	-0.114563	-0.0412364
ACOT9	0.341224	-0.0228572	0.0381775	0.0365522	0.064493	0.0143869	0.0176207	-0.0105618	0.0148662	0.0686285
ACOX1	-0.820066	-0.300923	0.0621677	0.0432239	0.0346098	-0.0295012	0.0388579	-0.0605216	0.00188605	0.0402707
ACOX2	-0.481702	-0.408587	0.297115	0.0319339	-0.0513101	-0.0220193	-0.151284	-0.133378	-0.223528	-0.00496147
ACOX3	-0.0122645	-0.0290834	0.00203295	0.0152921	0.0209641	0.0160419	-0.0653223	0.0617012	-0.0585615	-0.00154258
ACP1	0.0155626	-0.292314	-0.00247079	0.00132121	0.0147151	-0.0380503	0.154197	0.0442631	0.121351	-0.0138212
ACP2	0.0729838	0.255182	-0.117538	-0.0443458	0.014699	-0.0101896	0.0700165	0.0197508	-0.00867866	-0.0532476
ACP5	0.512682	0.0157915	0.32684	0.103624	0.0904855	0.0107333	-0.361948	-0.287352	-0.180352	-0.17452
ACP6	-0.0912774	-0.165669	0.103791	0.0653194	0.05354	0.124391	-0.224146	-0.0945884	-0.17438	-0.0210238
ACRV1	-0.0184209	-0.0837522	0.0306451	0.0449429	-0.0105795	0.0192034	-0.0201307	NA	0.0855704	0.190702
ACSBG1	-0.00786511	-0.24742	0.232131	0.0295622	0.0617233	-0.0411514	-0.0297373	-0.139942	-0.196169	-0.0218173
ACSBG2	-0.00401677	-0.0218304	-0.240666	-0.0384339	-0.239646	0.0673922	-0.14565	0.0270791	-0.111738	-0.018624
ACSF2	NA	NA	0.254864	0.0767053	0.0340112	-0.00225517	-0.163989	-0.0508211	-0.194405	0.0481073
ACSF3	-0.0137875	-0.0210062	0.00828897	0.00468352	0.0239082	-0.0521004	-0.0914044	0.000432247	-0.100632	0.0202671
ACSL1	NA	-0.0699203	-0.0469732	-0.0281695	-0.0257566	0.0346663	-0.0205178	0.00427489	-0.0129763	0.0426099
ACSL3	0.18589	-0.168856	-0.0321623	0.0203676	0.0216625	0.0639904	0.107408	-0.00306503	0.132957	0.0308037
ACSL4	0.610525	-0.0103581	-0.0308771	0.0170567	0.0339648	0.0811498	0.124267	0.0684952	0.253447	0.0407896
ACSL5	-0.328442	0.422668	0.12176	0.149986	0.0528106	0.0165424	0.159867	0.0904188	0.0969734	0.427887
ACSL6	-0.0136369	-0.241466	-0.128749	-0.0289242	-0.0149801	0.0634408	-0.0141692	-0.0248429	-0.0216307	-0.00574242
ACSM5	-0.056054	0.011206	0.102442	0.0104188	-0.115489	-0.0145677	-0.338519	-0.398166	-0.237214	-0.147186
ACSS1	-0.0316575	-0.4474	0.0206662	0.000450911	-0.0292032	-0.000662776	-0.314441	-0.282208	-0.385037	-0.155622
ACSS2	-0.391531	0.0326405	-0.112834	-0.0131506	-0.0251957	-0.0186402	-0.00711501	0.0741989	0.0111855	-0.0262231
ACSS3	-0.0259622	-0.0783447	0.321875	0.145325	0.0778797	-0.0272465	0.0552418	-0.0607543	0.00414691	0.102524
ACTA1	0.0182751	0.211934	0.0761683	0.0604647	-0.00120415	0.000579335	0.034345	0.210267	0.22167	0.218486
ACTA2	0.391318	-0.61	-0.149739	-0.0740294	-0.120332	0.0561407	-0.247467	-0.117993	0.0997325	0.506359
ACTB	0.101389	0.277279	-0.00197966	0.0194868	0.0128592	-0.00774213	0.155886	0.0406313	0.0558261	0.0327544
ACTC1	0.0864664	0.0320811	-0.0715926	0.000849713	0.0253735	0.0564707	0.0577076	0.283428	0.0709169	0.109116
ACTG1	NA	0.376445	0.063851	0.0161821	0.0585927	NA	0.160847	0.0434453	0.0386982	0.0167646
ACTG2	0.52877	-0.248917	-0.0587684	0.0697967	-0.0764986	0.0235518	-0.154474	0.155189	-0.252977	1.54179
ACTL10	NA	-0.0506889	-0.00710741	-0.00132821	-0.263224	-0.0191539	-0.0708007	-0.0974575	-0.118091	-0.0725963
ACTL6A	-0.0287702	-0.19599	0.0840251	0.0118205	-0.0359068	-0.0847956	-0.00594578	-0.114249	-0.035735	-0.0616899
ACTL6B	0.0101527	0.352533	-0.0978965	0.033532	0.0593727	-0.0210821	0.138657	0.10113	0.055519	-0.0265928
ACTN1	0.231688	-0.0732036	0.0212091	0.0642625	0.0258144	-0.026843	0.141357	0.194643	0.069437	0.14066
ACTN2	-0.0403782	0.016058	-0.0037874	0.0199347	0.0549167	-0.0206654	0.0550013	0.122547	0.0514051	-0.0364291
ACTN4	-0.0915854	0.533956	-0.101011	-0.0278464	-0.00305998	-0.00683892	0.031489	-0.000776243	-0.024003	0.0181147
ACTR10	-0.000541831	-0.0870607	-0.0493427	-0.0198854	0.000923021	-0.00574084	0.0909072	0.00280589	0.131999	0.00401401
ACTR1A	0.00318478	-0.0196373	-0.0697937	-0.00556828	0.0177776	-0.031043	0.0730759	0.0569844	0.0591067	-0.0185405
ACTR1B	-0.129672	0.261165	-0.272601	-0.0277583	0.0580895	-0.0300667	0.124086	0.0895828	0.0196755	-0.0133751
ACTR2	0.0116218	-0.137006	-0.0314121	0.0217638	0.0172208	0.0136016	0.0900043	0.00692766	0.163851	0.0451952
ACTR3	0.146927	-0.0448691	0.049356	-0.0147176	-0.00727974	0.000913514	0.0443214	-0.00310645	0.118714	0.0208251
ACTR3B	0.0140033	-0.0940285	-0.0236884	-0.00661567	-0.00674263	-0.0408687	0.106987	0.0558836	0.0795515	-0.0367394
ACTR3C	-0.0341845	-0.0994169	0.283207	0.0236359	0.0444568	-0.067221	-0.00777647	0.0244377	0.0382224	0.0196452
ACTR5	-0.0348782	0.183089	0.0189208	0.0508058	0.0458069	-0.0304619	-0.0755591	0.0434878	0.000220616	-0.00209264
ACTR6	-0.0186628	-0.290716	-0.0630657	0.0179132	0.0141206	0.0182027	0.0128283	-0.0565253	0.197714	0.0473575
ACTR8	-0.0800282	-0.112363	0.0535784	-0.00950482	0.00157949	0.0207319	-0.00151493	-0.0568074	-0.00368122	0.0272155
ACTRT3	-0.0321481	-0.00814692	0.22115	0.0335237	-0.00383593	0.0148054	-0.248218	-0.362875	-0.0560102	-0.143958
ACVR1	0.392429	-0.338581	0.0278071	-0.0548175	-0.0730048	-0.0662518	-0.155845	-0.136226	-0.082337	-0.0655161
ACVR1B	-0.323563	0.153032	0.0279603	0.0215977	0.0558808	-0.00201804	0.19636	0.132289	0.149086	0.0853251
ACVR1C	-0.316811	-0.0494059	-0.00858717	0.0325012	-0.00527652	-0.0253205	0.113301	0.0868602	0.0736841	0.061278
ACVR2A	-0.287917	0.136462	0.0234249	0.0378214	0.0161544	-0.00705665	0.0130035	-0.0157311	0.155197	-0.0181998
ACVR2B	-0.0241078	0.0964187	0.0472626	0.050221	0.00941617	0.0163634	-0.0816769	-0.0294077	-0.042657	0.00886818
ACVRL1	0.111665	-0.0143249	-0.16831	0.0320936	-0.03269	0.0731433	-0.0454213	0.119947	-0.018351	0.127097
ACY1	-0.326095	-0.162839	-0.0026269	-0.0227163	0.0150321	-0.0660618	-0.258897	0.143996	-0.260868	-0.193473
ACY3	0.155901	0.0111382	-1.03701	-0.52781	-0.31579	-0.0293323	-0.580198	-0.572198	-0.562231	-0.451344
ACYP1	NA	0.136848	-0.007995	0.0441652	0.0305921	NA	0.0104315	-0.0207038	-0.0046018	-0.0772201
ACYP2	0.0759563	-0.301652	-0.11125	-0.0756894	-0.0274252	-0.0465381	0.0359813	-0.0225676	-0.00610259	-0.101031
ADA	NA	0.10874	0.176674	0.0808958	0.0876815	0.00657849	-0.0604584	0.141022	-0.0198054	0.114316
ADAL	-0.130897	-0.235453	-0.031004	-0.033269	0.0418723	-0.0172934	-0.0616274	-0.0165101	0.0139647	-0.00826801
ADAM10	0.0462594	-0.245647	0.0189854	-0.0192451	-0.0237658	0.00547837	0.00182973	-0.0470825	0.106932	0.0447293
ADAM11	0.0296122	0.425668	-0.100995	-0.0463276	-0.00896827	-0.054046	0.0051635	0.119483	-0.00148684	-0.0525098
ADAM12	-0.0112873	-0.00686492	0.17971	0.0927812	0.0258928	0.0328837	-0.0555982	0.0609668	-0.0255915	0.367562
ADAM15	0.181268	0.00377796	-0.0919016	-0.0204089	0.0215555	0.0563142	0.0119854	0.163217	-0.0735798	0.00183008
ADAM17	0.0497327	0.0200418	0.07799	0.000795555	-0.00731078	-0.0222358	-0.000866516	0.0941539	0.0688218	0.0575307
ADAM19	0.474923	0.119984	-0.00875175	-0.0415561	-0.0367607	-0.0512137	0.0364217	0.124936	0.0781501	0.0422501
ADAM20	0.00582515	-0.0388959	-0.109304	0.0590154	0.0696695	0.0372391	-0.154924	0.0767542	-0.00591118	0.0258276
ADAM21	-0.0405247	-0.0247372	-0.164491	-0.0264258	-0.0131465	0.0758484	-0.253466	0.0181657	0.0346281	0.102222
ADAM22	-0.0114676	0.361119	-0.103456	-0.00480514	0.014493	0.0141757	0.106513	0.0977526	0.177938	0.0431351
ADAM23	0.0546309	0.335322	-0.167564	-0.0198515	0.0177345	-0.026369	0.120783	0.123314	0.15072	0.016514
ADAM28	0.00545747	0.0151003	-0.142225	-0.230431	-0.12944	-0.0382164	-0.430475	-0.326691	-0.170331	-0.169068
ADAM32	-0.0950259	-0.0577037	0.0788267	0.0258848	0.0424209	0.00488127	0.107537	0.139842	0.161134	0.233205
ADAM33	-0.0132873	0.0540013	0.136308	-0.102554	-0.0382095	0.0338283	-0.435132	-0.0981654	-0.401326	-0.121911
ADAM8	0.412243	0.0918394	0.124132	0.0183596	0.0970863	-0.00862388	-0.300941	0.0669019	-0.361424	-0.158261
ADAM9	0.523856	-0.189651	0.0632083	0.00892484	0.00616914	0.0384976	0.0882591	0.0271413	0.102911	0.131972
ADAMTS1	0.559861	-0.296182	0.0948114	-0.0206257	-0.11244	-0.136142	-0.00542852	-0.123546	-0.0711715	0.939858
ADAMTS10	-0.0102046	0.036907	0.0101233	0.00361978	0.00493349	-0.0516181	-0.162176	0.00661471	-0.18436	-0.0425906
ADAMTS13	-0.0486827	-0.0244232	-0.14255	-0.018263	-0.0119373	-0.0341484	-0.20617	0.0935349	-0.216542	-0.0543489
ADAMTS14	0.0315216	0.0594462	-0.269661	-0.0410688	-0.00688468	0.0270478	-0.487422	-0.0352012	-0.281425	0.000962535
ADAMTS15	-0.0225642	-0.0628692	0.260355	-0.0318268	-0.107174	-0.0314541	-0.157643	-0.0281662	-0.025736	0.404553
ADAMTS16	-0.0294432	-0.115811	0.0399039	-0.0149563	-0.00746509	-0.060031	0.0403952	0.0452955	0.0238845	-0.00157954
ADAMTS17	-0.0152277	-0.00556898	-0.0832628	0.00338651	-0.0280312	-0.00370408	-0.225154	-0.0768205	-0.16152	-0.0972947
ADAMTS19	NA	-0.0796344	0.110598	0.00659279	-0.00379655	-0.0887666	0.0479237	0.125968	0.081193	0.108692
ADAMTS2	0.0723515	-0.0390039	0.103316	0.29798	0.344382	0.0699495	0.572254	0.566852	0.257797	0.541339
ADAMTS3	0.0374838	-0.0658916	-0.105055	0.0599375	0.0295789	-0.133187	0.133789	0.146549	0.134889	0.0183862
ADAMTS4	0.0328353	0.242764	-0.298358	-0.0164832	0.000130404	0.0267197	0.060823	0.118145	-0.0568981	0.46409
ADAMTS6	0.114344	0.00161707	-0.0147903	-0.0403296	-0.0426195	-0.00458649	-0.127839	-0.0634598	-0.00369811	0.0496837
ADAMTS7	0.0171849	-0.0227632	-0.0354172	-0.0472745	0.0323796	-0.0250646	-0.366555	0.132378	-0.238373	-0.0320012
ADAMTS8	0.0495536	-0.0109843	-0.141485	-0.0513526	-0.011704	-0.0596962	0.0669813	0.0271777	-0.0759883	-0.0915484
ADAMTS9	0.528379	0.117428	0.40841	0.251878	0.189916	-0.0217794	0.716601	0.501426	0.377955	1.55864
ADAMTSL1	-0.160063	0.0812397	-0.309094	-0.0840393	-0.0136252	0.0167149	-0.0143277	0.0654869	0.0135735	-0.0132553
ADAMTSL2	-0.155411	0.172127	0.14445	0.000931041	-0.0622227	NA	-0.0643855	0.0410727	-0.113344	-0.100696
ADAMTSL3	-0.0222801	-0.0117987	0.0277627	-0.0101336	-0.0175754	0.0705243	-0.0978555	-0.0149826	0.0216984	0.195349
ADAMTSL4	0.2006	-0.0552254	0.0884258	0.206992	0.173025	-0.0160806	-0.0637039	0.143842	-0.0610551	0.0396989
ADAMTSL5	0.0241524	-0.0382246	0.0994484	0.0181492	-0.180763	-0.0146084	-0.221925	-0.117499	-0.319853	-0.177102
ADAP1	-0.172023	-0.0611338	0.0162187	-0.0151466	0.000544613	-0.0312321	0.0281581	0.0821699	-0.112596	-0.117546
ADAP2	0.197711	-0.0907325	0.151027	-0.125486	-0.138767	-0.0511996	-0.372622	-0.242871	-0.114649	-0.179683
ADAR	0.168883	0.254181	0.0578746	0.00647009	0.0185753	-0.00264586	0.0723591	0.0245597	0.0498994	0.0165963
ADARB1	0.319513	-0.0794925	0.00637714	-0.0167657	-0.0118379	-0.031763	0.0638915	0.077044	0.0793287	0.0245744
ADARB2	-0.0556233	0.236773	-0.203676	-0.0868108	-0.0347526	0.0667595	-0.101247	-0.124338	-0.140741	-0.105646
ADAT1	0.00874743	-0.108783	-0.0577937	-0.0270355	-0.0103116	-0.0899113	-0.088749	-0.0103689	-0.0701004	-0.0750191
ADAT2	-0.0920659	-0.0527636	-0.12248	0.0230682	0.0244752	-0.0615079	-0.108331	0.0145638	0.00279656	-0.0225084
ADCK1	-0.128475	0.315737	-0.207066	-0.0445375	0.00730538	-0.0439618	-0.170507	-0.0052519	-0.114808	-0.191027
ADCK2	-0.2489	0.282354	-0.047309	0.0216446	0.0337951	0.0441246	0.108785	0.139808	0.0224948	0.0304063
ADCK5	NA	NA	-0.0199839	-0.0604242	0.00175522	-0.0703231	-0.134251	0.108389	-0.150014	-0.141887
ADCY1	0.0706953	0.157073	-0.139606	-0.0337914	0.0164576	-0.0109966	0.149414	0.121758	0.0989216	0.0519452
ADCY10	0.0236934	0.0609696	0.255614	0.100104	0.0656315	0.051041	-0.060976	0.0320348	-0.107805	-0.00964922
ADCY2	-0.148999	-0.10555	0.0268213	0.0697925	0.0292611	0.0108932	0.0778196	0.0524093	0.100657	0.0205825
ADCY3	0.275499	-0.0133794	-0.00852388	0.0396083	0.0316264	-0.0742279	0.102239	0.137856	0.0241281	0.0919114
ADCY4	0.340051	0.0265113	-0.143001	-0.00756631	-0.0915585	0.0328482	-0.266428	-0.0331658	-0.248626	0.0624358
ADCY5	-0.0230887	0.217262	0.00957865	-0.00689004	0.0227435	-0.0390789	0.053848	0.100212	-0.0744434	0.0503741
ADCY6	-0.452867	0.151197	0.0333917	0.00634956	0.0291473	-0.014449	-0.0567868	0.100573	-0.0627966	-0.0248805
ADCY7	0.124436	-0.0816096	0.0929848	-0.036135	-0.0686159	0.0611926	-0.137056	0.0281736	-0.07228	-0.121281
ADCY8	-0.00419608	-0.0846182	0.0667566	0.0524741	0.0511576	-0.00701205	0.0904268	0.0793632	0.0245457	0.0721622
ADCY9	-0.314826	0.138353	-0.0594527	-0.00326562	0.0119338	-0.0482701	0.105781	0.0744148	-0.00805718	0.0559817
ADCYAP1	0.0291079	0.126841	-0.195665	0.14832	0.110888	-0.00524522	0.184081	0.323774	0.294185	-0.056394
ADCYAP1R1	-0.0143491	0.0113872	0.197752	0.106385	0.0308344	0.013378	-0.000112749	-0.0317271	-0.0608467	0.0137039
ADD1	0.00191893	-0.111841	-0.0518921	0.0174931	0.0142447	0.0012779	0.0333644	-0.00945905	0.0132335	-0.00880847
ADD2	0.138113	0.0317091	-0.0685629	0.0285684	0.0334403	-0.0361485	0.105361	0.134849	0.146797	0.00385554
ADD3	-0.32229	-0.470561	0.155402	0.00211002	0.0132206	-0.0196995	-0.0619848	-0.178999	-0.0667321	0.0415306
ADH5	-0.417512	-0.243329	0.0967612	0.0357548	0.0263405	0.0197969	0.0986465	-0.0174281	0.0377944	0.0911532
ADHFE1	-0.135865	-0.0866811	-0.0689791	0.0470258	0.0223373	0.0285971	-0.048188	-0.11266	-0.143416	0.0207192
ADI1	-0.190217	-0.151776	0.0642147	0.029678	0.00364346	0.0194281	0.0451284	-0.0921141	-0.0210417	0.0232069
ADIPOR1	0.0684242	0.0249889	0.0635386	0.0238106	-0.00405698	-0.0313742	0.0849052	0.0329684	0.0596001	0.0336573
ADIPOR2	-0.175304	0.298747	-0.0203206	0.00733325	-0.0232217	-0.00937984	-0.0440066	-0.0397604	-0.0253029	0.0286622
ADK	-0.0803428	-0.227626	-0.0399038	0.00134719	-0.00173251	-0.042059	0.0661723	0.00726337	0.0202216	-0.00601936
ADM	1.05969	0.0956454	0.484684	0.271637	0.227865	-0.0673923	0.45971	0.0795596	-0.271898	0.87025
ADM5	0.0282421	0.296251	-0.108057	-0.0776278	-0.179707	-0.060702	-0.229778	-0.0344138	-0.173401	-0.275913
ADNP	-0.102542	-0.12608	0.032108	0.0276416	0.019532	-0.0113513	0.0501236	0.0148792	0.111966	0.0505222
ADNP2	-0.00358745	0.00397972	0.0225297	0.0441628	0.039882	-0.00239285	0.0699314	0.092824	0.0817065	0.0287922
ADO	0.0374959	-0.225434	-0.124712	-0.0622962	-0.022262	-0.0211378	0.0648524	0.0117311	0.032209	-0.0508773
ADORA1	0.0844505	-0.216734	-0.173926	-0.0460885	-0.0158152	-0.093312	0.010467	-0.0217151	-0.0743307	-0.1138
ADORA2A	NA	0.0614588	0.141723	-0.0431866	-0.0733259	NA	-0.0102108	0.102709	-0.335018	-0.0656645
ADORA2B	-0.356887	-0.392616	0.234466	0.114914	0.059176	-0.0875175	0.0014592	0.047452	-0.197029	-0.00741617
ADPGK	0.193967	0.0097218	0.0115776	-0.0234453	-0.00211341	-0.0325205	-0.0906853	-0.0672242	-0.0160205	-0.0158719
ADPRH	0.0359167	-0.0608961	0.113547	0.00355315	-0.0634836	-0.00444316	-0.230419	-0.204967	-0.124401	-0.155321
ADPRHL1	-0.205198	0.458701	-0.145051	0.0774767	0.101258	0.0173332	0.171909	0.0503318	0.0199349	0.0627246
ADPRHL2	0.0784579	0.262497	0.0695526	-0.00178641	-0.0148599	-0.0456677	0.0586373	0.0626667	-0.085383	-0.0227501
ADPRM	-0.0476113	-0.0497331	-0.0306095	0.0121146	0.040548	0.0831178	-0.139994	-0.0424083	0.00879487	0.0526321
ADRA1A	0.00556383	0.0247568	0.122282	0.0236411	0.00939486	0.0244039	-0.0518302	-0.0503729	-0.0335658	-0.0843271
ADRA1B	NA	NA	-0.0743471	-0.100902	-0.0307241	-0.0675727	0.107414	0.104823	0.0604286	-0.0714843
ADRA1D	0.142459	-0.00613482	-0.531359	-0.103194	-0.0334409	0.00458068	-0.0475437	-0.173422	-0.157569	-0.258563
ADRA2A	-0.211451	0.150371	0.00718171	-0.0386004	-0.0381085	-0.055933	0.0368406	0.0525022	0.0420375	-0.0747569
ADRA2C	0.0272885	-0.0523817	0.103678	0.0426227	0.0302761	-0.00716017	0.155961	0.0412744	-0.153759	-0.0522995
ADRB1	0.0210221	-0.0646716	0.065939	-0.00558367	-0.0126809	-0.0525516	0.249799	0.196639	0.112494	-0.0131194
ADRB2	0.166092	-0.173385	0.0775535	0.0148666	-0.0314353	-0.0445075	-0.216154	-0.120775	-0.0549658	-0.0694106
ADRM1	0.153138	0.520549	0.0122585	0.00541137	0.0384077	-0.0472447	0.05432	-0.0102862	-0.0487927	-0.0557895
ADSL	-0.0359273	-0.0477931	-0.0225592	-0.00297462	-0.0128835	0.00224774	-0.060891	0.0131551	-0.0234403	-0.0335675
ADSS	0.0329446	-0.0926419	-0.110394	-0.0498672	-0.0290258	-0.0112512	0.0211143	0.000120524	0.131437	0.027265
ADSSL1	-0.0798173	0.109824	0.0387456	0.0537036	0.0672835	-0.0348026	0.0326305	0.12434	-0.0608557	0.340578
ADTRP	-0.262639	0.0226376	-0.274161	-0.0887373	-0.0718841	-0.133581	-0.191997	0.0365123	-0.00828846	-0.154692
AEBP1	0.403217	-0.140818	0.406553	0.18425	-0.038225	-0.0159241	0.0891245	-0.052004	-0.0656977	0.471398
AEBP2	-0.0238363	-0.122782	0.0258474	0.0271949	0.013572	-0.000512865	0.0212207	-0.00670179	0.0509611	0.0580765
AEN	0.327672	-0.0500381	0.159765	-0.0210115	0.00706919	-0.0259047	-0.0733651	-0.00605815	-0.137655	-0.0309449
AES	-0.10598	0.506791	-0.0949483	-0.020843	-0.00249342	-0.0270486	0.142574	0.0446887	-0.00713396	-0.0186645
AFAP1	-0.0811402	-0.050891	-0.0139744	-0.0276571	0.0162338	-0.0277119	0.0505795	0.0444059	0.0311811	-0.0340805
AFAP1L1	0.0540759	-0.0850204	-0.152832	0.00228762	-0.0382715	-0.0404666	-0.0609491	-0.161985	-0.115072	0.131705
AFAP1L2	0.254289	-0.0783733	0.0494288	-0.0140174	-0.0443477	-0.00449684	-0.116497	-0.124167	-0.113216	-0.0679697
AFF1	-0.133504	-0.224807	0.152058	0.0536032	-5.61e-05	-0.0217931	-0.011557	-0.0414694	0.0094344	0.130772
AFF2	0.0445761	-0.0624454	0.0163776	0.039115	0.0575605	0.0347968	0.120194	0.110416	0.203943	0.01343
AFF3	0.00494238	-0.152805	-0.0432187	-0.00597264	0.00654176	-0.0339721	0.121406	0.0856635	0.142211	0.0457779
AFF4	-0.102535	-0.412021	0.0919505	0.0223298	0.0205847	0.0528918	0.0663847	0.0291285	0.113957	0.0894983
AFG3L2	-0.449233	0.206039	-0.111229	-0.00836211	0.0228348	0.0196466	0.0234124	0.0476016	0.0608654	0.0447543
AFMID	0.0459577	-0.115773	-0.12426	0.0115153	0.0112051	-0.000768943	-0.0640018	0.0583929	-0.0308741	0.0158555
AFTPH	-0.0584644	0.106963	-0.0239216	-0.00826194	-0.0127949	-0.0161545	0.018598	-0.00432786	0.158075	0.0415845
AGA	0.111255	-0.0208677	-0.110387	-0.0737908	-0.0135859	-0.236091	-0.0101842	-0.0479304	0.122506	-0.0138351
AGAP1	-0.284655	0.355991	0.00147664	0.00235315	0.0288372	0.0133573	0.114811	0.085554	0.06752	0.0614517
AGAP2	NA	NA	-0.0145634	-0.0330199	0.0235192	-0.0355188	0.0818411	0.0880322	-0.0524837	-0.0388858
AGAP3	0.0762663	-0.0372637	0.0148028	0.0208631	0.0320474	-0.00530379	0.105589	0.117476	-0.0200134	-0.00926407
AGAP4	NA	0.0833384	0.176867	0.0813183	0.131226	NA	-0.184332	0.0387262	-0.0941434	0.0603644
AGAP6	NA	-0.0898028	-0.0405099	0.00149109	0.00493723	NA	-0.147191	0.057068	-0.0966759	-0.0591158
AGBL1	-0.0113003	0.0668534	-0.0602421	0.0604535	-0.0211037	0.0237475	-0.124695	0.0961757	0.0771204	-0.216334
AGBL3	-0.00423313	-0.0572524	-0.170992	-0.0374666	0.00256285	-0.0219959	0.0150683	-0.00477775	0.053172	0.0236933
AGBL4	0.00733962	0.055125	-0.097848	0.012581	0.0591013	-0.0379099	0.0839452	0.143614	0.109587	0.0711952
AGBL5	-0.15199	0.0890332	-0.000599838	-0.0126616	0.00144907	0.00940915	-0.080507	0.00142373	-0.0205433	-0.0366803
AGER	0.0306985	0.00166552	0.128353	-0.0734367	-0.0564049	-0.0468685	-0.431754	-0.141794	-0.266892	-0.199395
AGFG1	0.0202612	-0.144811	-0.0188467	-0.0099943	-0.0196294	-0.0433316	0.0086132	0.0336385	0.106851	0.0294988
AGFG2	-0.408971	0.216089	0.0579273	0.0618951	0.0307805	0.0018692	0.109767	0.0968328	-0.0262896	0.121763
AGGF1	-0.0614846	-0.0671328	-0.0298868	-0.00989376	-0.012218	-0.0525141	0.00873287	-0.0191874	0.113539	-0.0271859
AGK	0.0100865	-0.105035	-0.0723956	0.00547823	0.0351273	-0.0320519	0.0143302	0.0228986	0.0841967	-0.000167153
AGL	-0.223744	-0.328301	-0.134339	-0.0240664	0.0385164	0.053309	0.0199037	-0.0423925	0.0468258	0.0699193
AGMAT	-0.461989	-0.0109619	-0.0392715	-0.0875163	-0.0947101	0.00507267	-0.0247928	0.0786289	0.0325953	-0.157032
AGO1	-0.152886	-0.0332936	-0.0430775	-0.0168788	-0.017373	-0.0287545	-0.0067691	-0.0241548	-0.00559447	-0.00423433
AGO2	0.166819	-0.0995738	-0.0164195	0.00962704	0.0233882	-0.0689111	-0.00313862	0.0350173	0.0333186	-0.00255163
AGO3	0.000955932	-0.17024	-0.00329313	-0.0206051	-0.00782187	-0.0166611	-0.0759554	-0.0389459	0.016738	-0.0343995
AGO4	0.0164612	0.0336658	-0.0155898	0.0203573	0.00929539	-0.0523828	-0.0968151	-0.0635256	-0.0390374	0.0164849
AGPAT1	-0.100319	0.238373	-0.0193002	0.0113606	-0.000836355	-0.0460714	0.0847309	0.0113122	0.00969452	-0.0675288
AGPAT2	-0.313149	0.138135	0.212767	0.143557	0.127706	0.0142131	0.131776	0.1118	-0.0717298	0.0184747
AGPAT3	-0.154181	0.167168	-0.00946087	-0.0163808	-0.00764674	-0.00147654	0.0612391	0.00453773	-0.00595122	3.38e-05
AGPAT4	0.473811	-0.0279927	-0.0534736	-0.056013	-0.00574764	-0.019812	-0.0324373	0.0777936	0.0990244	-0.0541046
AGPAT5	-0.25707	-0.278007	0.0310359	-0.0101606	-0.00454864	-0.0172008	0.0380333	-0.0974558	-0.0108994	-0.0165348
AGPS	-0.00886829	-0.163134	-0.00932458	-0.0189997	-0.016005	0.00189489	0.000776893	-0.012383	0.114282	-0.00108244
AGRN	0.25709	0.354337	-0.0153311	-0.0743658	-0.0372614	0.0147575	-0.161983	-0.0225458	-0.238115	-0.139971
AGRP	NA	0.076415	-0.0305645	-0.00893561	-0.134084	0.0580262	-0.211873	-0.0457389	-0.361855	-0.058947
AGT	0.620571	-0.0446913	0.217221	0.12091	0.0936973	-0.0416505	0.147521	-0.105924	-0.129714	0.0315754
AGTPBP1	0.108294	0.0534611	-0.0800688	-0.0384394	-0.00765222	-0.00875531	-0.0571191	-0.060107	0.112027	0.0737568
AGTRAP	0.177398	0.0784671	0.254171	0.105251	0.00875358	0.0448176	-0.0193749	-0.0430793	-0.148262	0.0683526
AHCTF1	-0.0375081	-0.153539	0.0382028	0.0585891	0.0325257	0.00265449	0.0611219	0.0508634	0.131844	0.147243
AHCY	-0.087053	0.420396	-0.0333714	0.00368456	0.0244041	-0.035501	0.139459	0.0543391	0.0296993	0.0269962
AHCYL1	0.019151	-0.00261433	0.164838	0.138249	0.0657798	-0.0110947	0.179697	-0.0380466	0.022902	0.126112
AHCYL2	-0.688144	-0.33444	0.0936775	0.0177963	0.0038692	0.0176784	-0.011477	-0.101673	-0.0655343	0.0454481
AHDC1	0.0522118	0.391308	-0.0418365	0.00501897	0.0178316	0.0397149	0.129347	0.124256	0.00997368	0.026589
AHI1	0.0848705	0.0510007	-0.112648	-0.0478443	-0.0212647	-0.00443448	-0.107537	0.00531662	0.0943082	0.0134349
AHNAK	0.0735954	-0.182996	0.245308	0.0919474	0.0259116	0.0087363	-0.0380379	-0.158662	-0.0692642	0.253211
AHNAK2	0.29689	0.382276	-0.0697125	-0.0111732	-7.14e-05	-0.0222512	0.0637526	0.098829	0.119832	-0.0132722
AHR	0.445951	0.00868685	0.025354	-0.014821	-0.00679596	-0.0167408	0.0644221	-0.0210707	0.0931713	0.0605004
AHRR	-0.0124225	0.00872844	0.0603761	-0.0783321	-0.137128	-0.140716	0.0329721	0.195687	0.0505219	0.0490794
AHSA1	-0.0803306	0.0301028	0.11695	0.0573918	-0.0220711	-0.0102522	0.112752	0.0953549	0.11893	0.0137879
AIDA	NA	0.0457264	0.125393	0.0439884	0.0176254	0.00784986	-0.0160778	-0.0510481	0.0847522	0.042369
AIF1	0.622506	0.0811498	-0.0839687	-0.191755	-0.170811	-0.085049	-0.437348	-0.397659	-0.120502	-0.255439
AIF1L	0.162835	0.225094	-0.159403	-0.131093	-0.0743067	0.0110321	-0.366062	-0.33958	-0.298063	-0.100614
AIFM1	-0.334122	-0.171801	-0.0409425	-0.00170715	-0.00848681	-0.0404309	0.0140677	-0.0389891	0.0116342	-0.0296875
AIFM2	-0.21375	0.128607	0.120872	0.0667183	0.06157	0.0403979	-0.115166	0.0391588	-0.123717	0.0840411
AIFM3	-0.170039	0.109575	0.0328715	0.00525528	0.0107403	-0.0145425	-0.0886593	-0.0805636	-0.236869	-0.00949727
AIG1	-0.0640488	-0.248718	-0.0283209	0.0148825	0.0323587	0.0276676	0.000764359	0.0412937	0.064301	-0.00502931
AIMP1	-0.0173822	-0.0653302	-0.00110206	0.00374569	-0.00960198	-0.104983	-0.031295	-0.102252	0.0580213	-0.0131507
AIMP2	-0.259553	-0.0492775	0.0463654	-0.0575937	-0.0322162	-0.0412653	-0.00752771	-0.0274427	-0.122587	-0.123667
AIP	0.0257404	0.441603	-7.74e-05	0.0159579	0.0238236	-0.0291279	0.103869	-0.00447418	-0.0280756	-0.0275543
AIRE	-0.0357534	-0.00723312	0.385384	-0.00619593	0.123177	0.0403531	0.0719638	0.452168	0.0500684	0.272892
AJAP1	-0.0483149	0.44247	0.00574181	0.0152557	0.0332019	-0.0399795	0.0853547	0.101013	0.0971599	-0.0120442
AJUBA	0.0581733	-0.0352783	0.148291	-0.0140427	-0.178558	0.067317	-0.174182	0.000223211	-0.214609	-0.0319711
AK1	NA	NA	-0.0253948	4.07e-05	0.0152664	-0.0239385	-0.071398	-0.069624	-0.0982894	-0.0366
AK2	-0.192265	-0.122761	0.018178	-0.013015	-0.00922728	-0.0203694	-0.120977	-0.0793008	-0.0348472	-0.0131696
AK3	-0.428198	-0.261133	0.148005	0.021032	0.0213772	-0.0190986	0.0395568	-0.121501	-0.0493337	-0.0242566
AK4	-0.356675	-0.417109	0.210074	0.0803442	0.00215534	-0.0252168	0.0400706	-0.0871889	0.0379956	0.078447
AK5	0.0021772	0.154803	-0.0558046	0.0191308	0.00453281	0.0138385	0.156661	0.106028	0.192065	-0.0207563
AK7	-0.00210761	-0.0378153	-0.0196686	0.0679592	0.0841491	-0.0215897	0.12366	0.178142	0.201422	0.264984
AK8	0.0137877	0.135366	-0.0719795	0.0100841	0.134593	0.0231045	0.0614017	0.0769125	0.0174774	-0.0333847
AK9	-0.0591352	-0.144571	0.00935268	-0.00420043	-0.00602162	0.0648343	-0.0814744	-0.120983	0.0674599	0.08235
AKAP1	-0.459111	-0.0910747	0.0120004	0.0408686	0.0246486	0.0321766	0.0452788	0.0165196	-0.00768074	0.0896252
AKAP10	-0.0582454	0.00127194	-0.0481035	0.0161636	0.0131367	0.0295939	0.057654	-0.0121409	0.0905679	0.0325796
AKAP11	0.0949975	NA	-0.0836579	0.014343	0.0295779	0.00211753	0.0857732	0.052564	0.179599	0.0546448
AKAP12	-0.00301906	-0.369632	0.142919	0.0692937	0.0765361	0.0138504	0.232382	0.143634	0.17785	0.209533
AKAP13	0.0704509	-0.0448985	0.140187	-0.00702726	0.00890538	-0.0439822	0.0893925	0.0955805	0.119971	0.182046
AKAP17A	0.207845	0.228021	-0.0173395	0.0201529	0.0216833	-0.00365978	-0.0812802	0.0304935	-0.0798436	-0.0651729
AKAP3	-0.0164435	0.0863061	-0.0540499	0.0314139	0.0780001	0.0518483	-0.146049	-0.117538	-0.129757	0.0463319
AKAP5	0.0329193	0.0361748	-0.00878438	-0.0355771	-0.0065747	-0.0563369	0.193819	0.0761899	0.191535	0.0447825
AKAP6	-0.00482676	-0.0590452	-0.127326	-0.0277774	0.00108396	-0.00454954	0.0105927	0.0135558	0.120531	0.0159898
AKAP7	-0.212434	-0.264082	0.0120424	-0.00735517	-0.0104495	0.0226987	-0.0894339	-0.0964989	0.0303976	-0.0167761
AKAP8	-0.0724265	0.196251	-0.0274976	0.0335332	0.0491929	0.0244705	-0.0269218	0.00378606	-0.0627184	0.0610285
AKAP8L	0.00329509	0.315136	0.0863422	0.068012	0.0455917	-0.049393	-0.00421569	0.130636	-0.0210052	0.0384762
AKAP9	-0.0879957	-0.0310945	-7.89e-05	-0.00111459	-0.0105068	0.0149063	-0.085219	-0.0519376	0.153686	0.0666668
AKIP1	0.00936607	-0.206308	-0.0372569	0.00786342	0.00205503	-0.0310834	-0.0163496	0.00120066	-0.067919	0.031618
AKIRIN1	0.00648306	-0.218301	0.0561171	-0.0212562	-0.0190548	-0.0395273	0.0636724	0.0388294	0.0900542	-0.0310275
AKIRIN2	0.359342	0.00184761	0.0472464	0.0477933	0.0204849	-0.0311231	0.143499	0.0139614	0.0235488	-0.0480703
AKNA	0.170202	0.078222	0.121862	0.0227436	0.0209134	0.00725786	-0.166973	-0.0437522	-0.14267	-0.0320835
AKR1A1	0.167793	-0.189827	-0.0782856	-0.0293821	0.0112442	-0.050125	-0.0155371	-0.0791286	-0.0380449	-0.0552954
AKR1B1	NA	0.189528	-0.0449019	0.00844359	0.0121801	-0.0417059	0.0538752	0.0387308	0.00861104	-0.0425378
AKR1C1	-0.260111	-0.254265	0.12367	-0.0114548	-0.0409988	0.031916	0.0118766	0.0631744	0.127608	0.17107
AKR1C2	NA	-0.0177341	-0.0640331	-0.0381206	-0.0380441	NA	-0.0897847	0.0737557	0.0405565	0.14474
AKR1C3	-0.223869	-0.336887	0.508871	0.102342	0.0132051	-0.0551885	-0.0509512	-0.0384746	-0.0728281	0.0121656
AKR1E2	-0.0181214	-0.128773	0.0657964	0.00732997	-0.0414173	-0.00664769	0.0264722	0.142334	0.117058	0.261302
AKR7A2	-0.256026	-0.225808	0.0790881	0.0347354	0.0744731	-0.0200601	0.0998734	0.0183201	-0.0500483	0.0754765
AKR7A3	-0.400769	-0.0266467	0.141646	-0.0450635	0.0378774	0.0468617	-0.093413	0.0536746	-0.242383	-0.0649143
AKT1	0.0287113	0.201521	-0.0127501	0.0138844	0.0441895	-0.0540101	-0.0500034	-0.0198951	-0.0894153	-0.030437
AKT1S1	0.0140318	0.137218	0.0184394	0.00269076	-0.065556	-0.0602456	-0.0368065	-0.0149254	-0.113262	-0.0409081
AKT2	0.0551131	-0.0665807	-0.022584	0.0105137	-0.00188229	-0.0792216	-0.169058	0.0202385	-0.142558	-0.0287141
AKT3	0.013167	0.0101143	-0.0617941	-0.0365204	-0.0244774	0.0144162	0.0234271	-0.0274889	0.120313	0.048721
AKTIP	NA	-0.087234	0.0395933	0.0113404	0.00229456	0.0178934	0.0517132	0.0336521	0.0743653	0.010236
ALAD	-0.404359	0.166404	-0.0142527	-0.0228876	-0.0120106	-0.0115647	0.000968363	-0.0252124	-0.0223087	0.0253777
ALAS1	-0.0884137	-0.0478258	0.00287729	0.00565958	0.0312606	-0.0261388	0.0930123	0.0480926	0.0697336	0.00271565
ALCAM	0.292374	-0.259387	-0.00873754	-0.0454502	-0.0439709	0.00668677	-0.0341501	-0.0342809	0.0657171	-0.0250129
ALDH16A1	0.0200562	0.0446425	0.0462501	-0.0247581	0.000706547	-0.0043609	-0.166358	-0.155605	-0.179442	-0.159227
ALDH18A1	-0.464028	-0.044215	0.0955531	0.0224283	0.0242309	-0.0272287	0.083348	0.0271134	0.0564259	0.0564117
ALDH1A1	-0.37347	-0.598812	-0.0908005	-0.150492	-0.0615556	-0.137164	-0.202526	-0.486176	-0.365229	-0.172922
ALDH1A2	0.246872	0.0872815	0.0697152	-0.00753076	0.0287974	-0.0143438	0.0299102	-0.0743321	0.0802925	0.034375
ALDH1A3	0.46522	-0.0709047	-0.148783	-0.0443647	0.103558	-0.0206194	0.103478	0.0705436	0.0302371	0.163435
ALDH1B1	-0.284293	-0.0340301	-0.00713388	0.0163839	0.0332182	0.000308688	0.0923472	-0.0643282	0.0350611	0.0721233
ALDH1L1	-0.04694	0.456417	0.234534	0.274469	0.132549	0.013912	0.190459	0.131124	0.0576767	0.239798
ALDH1L2	0.207888	-0.021861	0.11185	0.0831979	0.0623413	0.011824	-0.0129166	0.0301119	0.108077	0.14852
ALDH2	-0.156508	-0.18266	0.126825	0.0706492	0.0604531	0.0375781	0.130766	-0.0929629	-0.0531896	0.130802
ALDH3A2	-0.282782	0.200495	0.0188038	0.0438888	0.0320103	-0.0436751	0.105832	0.0810293	0.0704182	0.150846
ALDH3B1	0.186469	0.0729828	0.0610494	-0.0101749	0.0139004	0.0776977	-0.330466	-0.157991	-0.318042	-0.133543
ALDH4A1	0.0885304	-0.458053	0.328711	0.116192	0.066196	-0.0104807	0.0219374	-0.0677663	-0.109055	-0.0213684
ALDH5A1	-0.332585	-0.29715	0.0276654	0.0256666	0.0310933	0.0303791	0.0855778	-0.00747406	0.0475187	0.05436
ALDH6A1	-0.3185	-0.263559	0.1847	0.088279	0.063794	0.0820428	0.110537	-0.133754	-0.0436704	0.108134
ALDH7A1	-0.196908	-0.267371	0.163905	0.0881026	0.046009	0.0260887	0.0175059	-0.153963	-0.0585539	0.0573063
ALDH8A1	-0.00838036	0.0629854	-0.0397745	-0.0423795	0.119863	-0.148713	-0.14833	0.0665732	-0.166226	-0.0147677
ALDOA	-0.11732	0.388982	-0.00312315	0.0335381	0.0146984	-0.00350184	0.190547	0.113309	0.107042	0.00564476
ALDOB	1.32368	0.318203	-0.0257721	0.0771382	-0.0144732	0.0370781	0.064666	0.273205	0.167586	0.194251
ALDOC	0.0864891	-0.393368	-0.0340682	0.0434506	0.00833807	-0.0159738	0.0203344	-0.113715	-0.127699	-0.0490932
ALG1	0.0834192	0.0613831	-0.0560426	-0.030678	0.0017654	-0.0578258	-0.0319094	0.0728351	-0.0270273	-0.0287868
ALG10	-0.00118709	-0.0370803	0.0343386	0.03034	0.00224058	-0.00403805	-0.0180279	0.0453379	0.160022	0.0770325
ALG10B	NA	0.0237398	-0.0348767	0.0050562	-0.00981284	NA	0.0627857	-0.0266489	0.119381	0.0272433
ALG11	0.0720054	-0.178939	-0.0471625	-0.0409375	-0.0382227	NA	-0.0965926	-0.0654605	-0.0182829	-0.0301084
ALG12	-0.0433888	-0.0077428	0.0385762	-0.0254685	-0.0169772	-0.0569736	-0.0968232	0.0508011	-0.129249	-0.065948
ALG13	0.106107	-0.125521	-0.099724	-0.0363914	-0.02034	-0.0766858	-0.0455808	-0.0159658	0.0174487	0.0237577
ALG14	-0.152406	-0.232677	-0.0806657	-0.0498921	-0.037077	-0.0108678	-0.0273872	-0.0359737	0.0228672	0.0360687
ALG1L	-0.158463	-0.0234074	0.110023	-0.0853469	0.12536	NA	-0.242497	0.130209	-0.182862	-0.15808
ALG1L2	NA	-0.0738826	-0.119722	-0.0626005	-0.0590054	NA	0.0728525	NA	-0.0491135	-0.0102799
ALG2	0.0774904	-0.0112046	0.00968071	0.00723454	-0.00886105	-0.0728963	0.0124251	0.0186905	0.0391119	-0.0110906
ALG3	0.0190621	0.0676352	0.0266712	0.0196275	-0.015967	-0.0296593	-0.00223093	-0.0241585	-0.0516248	-0.059589
ALG5	0.194787	-0.36182	-0.0627853	-0.0548272	-0.029265	0.0139817	0.0234708	-0.0602811	0.0595157	0.0637063
ALG6	0.0134973	-0.0701248	-0.068347	-0.00972858	-0.0143768	0.00673519	-0.140776	-0.0225715	0.0694455	-0.00406595
ALG8	0.0813112	-0.0629158	0.0229259	-0.0022349	0.0112407	-0.012151	-0.0301163	-0.0471207	0.0350309	0.0182713
ALG9	0.146316	0.171624	-0.0457762	0.0112431	0.0133061	-0.0348684	-0.002866	0.0256628	0.0537127	0.0277479
ALK	-0.0140557	-0.261507	0.0474599	0.0226242	0.0601769	0.00826232	-0.0896641	0.0181364	-0.105778	-0.0793403
ALKBH1	-0.0829553	-0.0656977	-0.0313414	0.0287303	0.0433013	0.00879383	0.00430462	0.00954772	0.0161881	0.0542301
ALKBH2	-0.0635302	0.233232	-0.0208138	0.0354943	0.0699287	-0.0169865	0.0222568	-0.00830141	-0.0513535	0.0146606
ALKBH3	-0.0224172	0.170207	-0.0835159	-0.00792593	0.058473	-0.0578663	-0.00616158	-0.0295356	-0.00147359	-0.000730219
ALKBH4	-0.094503	0.0146472	-0.0184745	-0.000976614	0.0378005	-0.0608774	0.0835595	-0.00435872	-0.0489574	-0.104874
ALKBH5	0.131379	-0.0137428	0.0655354	0.0416123	0.0168056	-0.0390437	0.113069	0.0554647	0.0536102	0.0363138
ALKBH6	0.323525	0.230626	-0.0888308	-0.0380491	-0.0312777	-0.111022	-0.110882	-0.0500109	-0.11206	-0.166467
ALKBH7	-0.349121	0.0785791	0.0409878	-0.00313329	0.0221502	-0.0299497	0.094048	-0.013925	-0.0978624	-0.100861
ALKBH8	-0.0512613	-0.179535	-0.0978814	-0.0271763	-0.0142358	0.00663405	0.0146836	-0.026936	0.0802082	0.0107389
ALMS1	-0.111017	-0.0686032	0.0132684	-0.0270545	-0.00790638	0.051002	-0.118119	-0.0380304	-0.0182096	0.0636481
ALOX12	0.0255436	0.00779597	-0.0423214	0.0800754	-0.0564397	0.0414088	-0.166925	0.00381754	-0.195374	-0.0547935
ALOX12B	-0.0794341	0.404864	-0.496106	0.174965	0.258389	0.0253356	0.532593	0.0335684	0.253675	0.357739
ALOX15B	0.0067956	0.00113792	-0.15896	0.484817	0.298785	0.0536002	0.780062	NA	0.439386	0.285721
ALOX5	0.418465	0.538922	0.156723	0.0400309	0.0647364	-0.0278493	-0.258295	-0.0052337	-0.207974	0.0691917
ALOX5AP	0.303635	0.556558	-0.0148427	-0.090054	-0.097528	-0.13912	-0.224062	-0.325324	-0.1133	-0.263847
ALOXE3	0.0102103	0.0923776	0.0434818	0.117201	0.17892	-0.00488946	0.0957091	0.294758	-0.0145543	-0.0322886
ALPK1	0.0525657	0.0616786	0.325065	0.102337	0.104031	-0.0049465	-0.29518	-0.032146	-0.0504015	0.217361
ALPK3	-0.00958884	-0.045931	-0.0126936	-0.0399343	-0.020799	0.043503	-0.0445149	0.0243275	-0.045335	0.121764
ALPL	0.771501	-0.487171	-0.0374331	-0.0999926	-0.145269	-0.0381376	-0.165173	-0.21016	-0.240544	-0.0543904
ALS2	0.17887	0.0139161	-0.0428134	0.0100807	0.00514722	-0.0127836	0.0159598	0.0638946	0.0920165	0.0686622
ALS2CL	-0.0550215	-0.0353761	-0.0510542	0.108378	0.228672	0.0438682	-0.000827568	0.158664	-0.0878675	0.109883
ALS2CR12	0.016226	-0.0588903	-0.0256283	-0.00629821	-0.019972	-0.00716108	-0.165957	-0.00279437	-0.0907913	0.0344999
ALX4	0.00515211	0.0119951	-0.0156379	-0.123856	-0.0916167	0.0289789	0.0584265	0.116157	0.0802998	0.269164
ALYREF	0.0646075	-0.0477645	0.078792	0.0270431	0.0330602	-0.113302	0.102212	-0.0192653	0.00476129	-0.0546234
AMACR	-0.787734	-0.110299	-0.139401	0.0171502	0.133384	0.0112565	0.248095	0.138355	0.0219407	0.30598
AMBRA1	-0.00777409	0.067966	0.0133554	0.0167532	0.0374548	-0.0009224	0.0598049	0.0598896	0.0344339	0.0541216
AMD1	0.0856115	-0.0214429	0.0296471	-0.0173469	-0.00316134	0.00453693	0.0518266	0.00140079	0.0608827	-0.027049
AMDHD2	-0.0710715	0.149683	-0.0556332	-0.0447596	-0.0176562	-0.0456551	-0.120523	0.0082604	-0.14983	-0.19105
AMER1	-0.103259	-0.0275043	-0.0433435	0.0156553	0.0211892	0.0296977	-0.0289633	-0.00429266	-0.0510108	0.0148063
AMER2	0.0249047	0.257987	-0.144326	-0.0344672	-0.056211	-0.00352731	-0.0815561	-0.119912	-0.062076	-0.0821822
AMER3	0.0283153	0.0128264	-0.07448	-0.00510861	0.0196151	-0.0567703	0.12713	0.0986732	0.0171653	0.00468217
AMFR	-0.0727607	-0.173377	-0.0122824	0.0303911	0.0481452	-0.0152114	0.136819	0.0483542	0.0444123	0.0456817
AMH	NA	NA	0.0914211	0.0149104	0.286641	0.0382746	-0.409549	0.126565	-0.395849	-0.226597
AMIGO1	-0.0126617	0.0883189	-0.109186	-0.00295254	0.0179257	-0.00551045	0.134587	0.0439444	0.0833174	0.0275761
AMIGO2	-0.00736042	-0.0477087	0.202689	0.0461169	-0.0755352	-0.0458709	-0.0214331	0.029873	0.111017	-0.15638
AMMECR1	0.0719735	-0.13875	-0.023722	0.032075	0.0385122	-0.0362176	-0.0428444	0.0263154	0.0475056	0.0974482
AMMECR1L	-0.0605668	-0.216468	0.0576488	-0.00942304	-0.0272734	-0.0408302	-0.0662417	-0.07184	-0.0414977	-0.0281209
AMN1	0.0518284	-0.230538	-0.0676383	-0.0201785	0.00426671	-0.0113268	0.0521832	-0.0107659	0.0934704	0.0218907
AMOT	0.0223132	-0.576678	0.160205	0.0456348	0.00907957	0.0148849	0.00261878	-0.235011	-0.166637	0.0468648
AMOTL1	-0.0167355	0.0128222	0.0719717	-0.0258666	-0.0147134	-0.114124	-0.0681483	-0.0302181	0.0366317	-0.0146038
AMOTL2	-6.17e-05	-0.06096	-0.163279	-0.040415	-0.0458666	0.00915371	-0.129188	-0.0371824	-0.0973832	-0.0536328
AMPD2	-0.0228969	0.0306567	-0.0271981	0.0113488	0.0386761	-0.0564336	0.0713127	0.0433951	-0.0867345	-0.0203444
AMPD3	0.139751	-0.14748	-0.0621353	0.000791431	-0.0317835	-0.0098175	-0.077025	-0.0756544	-0.0848823	-0.0290988
AMPH	0.180535	0.156519	0.0040998	0.0211446	0.0365819	0.00231585	0.250874	0.181482	0.242946	0.106443
AMT	-0.212565	-0.0374613	-0.0702674	0.0107364	0.0712948	0.00490484	-0.196034	0.0560267	-0.115052	-0.0303459
AMY2B	NA	-0.217293	-0.0533421	0.00875475	0.0106716	NA	-0.183205	-0.0795177	-0.131397	-0.0474517
AMZ1	0.000863447	-0.00265273	0.210097	-0.00795926	0.00778583	-0.00449675	0.00196312	0.119196	0.00366401	0.0725293
AMZ2	NA	-0.0636472	-0.043691	0.0037829	0.0123136	NA	0.0421582	-0.0563754	0.0438267	-0.0152782
ANAPC1	NA	NA	-0.0978723	-0.0237998	0.00637448	-0.0633363	0.0444647	0.0541454	0.133476	0.0609814
ANAPC10	0.144872	-0.267919	0.00372778	-0.00342654	-0.00989737	-0.044318	-0.0233815	0.0160726	0.1145	0.0275092
ANAPC11	-0.0978569	0.0226721	-0.00668454	0.0138118	0.0152605	0.000813493	0.0960896	0.0313939	-0.0694335	0.0032229
ANAPC13	0.105684	-0.013713	-0.0236069	-0.00703358	0.00890901	-0.0318772	0.0399138	-0.021004	0.0688699	-0.0431517
ANAPC15	-0.141054	0.093718	-0.152529	-0.0474742	-0.030944	-0.0258257	0.00316806	-0.0954188	-0.0700784	0.0182573
ANAPC16	-0.0442677	-0.305537	0.0383442	0.0368437	-0.00608352	0.0291419	-0.0302228	-0.0749332	-0.0249409	0.0014859
ANAPC2	0.0170357	0.288147	-0.0276169	-0.0179405	0.0259116	-0.0202085	-0.123749	0.0795497	-0.113474	-0.0339523
ANAPC4	-0.0406266	0.0741889	-0.031863	-0.00986915	-0.0150485	-0.0131666	-0.0294325	0.0415998	0.079817	0.0635927
ANAPC5	0.030669	0.191007	-0.15094	-0.0412499	-0.0111172	-0.00853214	-0.0600519	0.0349183	0.0239976	0.00663064
ANAPC7	0.0639318	-0.0533903	-0.0907926	-0.0318379	-0.015989	-0.0374216	-0.0442296	-0.0481676	-0.041562	-0.0726304
ANGEL1	0.0557166	0.172985	-0.000206007	-0.00376235	0.0252179	0.0631638	-0.0351252	0.0717633	-0.0198039	0.0588911
ANGEL2	-0.0482935	-0.0948643	-1.99e-05	0.0232866	0.0106886	0.0221083	0.00414844	-0.0097453	0.0752378	0.0355967
ANGPT1	0.0472017	-0.124946	0.215946	0.0807818	0.0163421	0.0617417	0.00135647	-0.1747	0.144124	0.39256
ANGPT2	0.33416	0.182971	0.058114	-0.00242557	-0.201202	-0.0269855	0.0309969	-0.0283139	0.0290728	0.164031
ANGPTL1	0.0438114	-0.016308	0.138019	0.0292684	-0.0848684	-0.0203764	-0.0429027	-0.148778	0.074099	0.0752728
ANGPTL2	0.695234	-0.157113	-0.0699366	-0.13881	-0.164304	0.0141265	-0.138364	-0.0197855	-0.114208	0.0127632
ANGPTL3	-0.00843158	0.10263	0.0960037	0.057872	-0.00504954	-0.00667617	0.266417	0.125254	0.340843	0.125407
ANGPTL4	0.439389	0.884031	0.380713	0.402802	0.389356	-0.0315679	0.724132	0.568606	0.20788	0.824235
ANGPTL6	0.148398	-0.0449956	0.0642988	-0.0505939	0.0159214	0.0709346	-0.0514867	-0.142162	-0.26854	-0.156678
ANGPTL7	-0.0611276	0.0789996	-0.190296	0.0123522	0.035934	-0.036587	0.137009	0.120845	-0.00467632	-0.0364437
ANK1	-0.043836	0.129168	-0.211175	-0.0874711	-0.0158314	-0.0476303	-0.0658414	0.0183559	-0.0505077	-0.0224335
ANK2	0.0414936	-0.0256657	-0.0560424	-0.00679809	0.00548745	-0.0139202	0.112657	0.0814214	0.160456	0.0339704
ANK3	-0.684092	-0.201558	-0.128602	-0.0435138	-0.0249328	-0.00808737	0.020199	0.0505682	0.134962	0.0182885
ANKAR	-0.14387	-0.184817	0.028789	-0.0239636	0.0192397	0.0419727	-0.155651	-0.114224	-0.104313	0.0246577
ANKDD1A	0.290773	-0.0481313	0.0745124	0.0888228	0.103391	-0.0250444	-0.017691	0.0511297	-0.0305344	0.115157
ANKDD1B	NA	0.0899467	0.00616683	0.0676082	0.033091	NA	-0.21156	-0.0505474	-0.104001	-0.0772921
ANKEF1	-0.0121499	-0.0288144	0.0777858	0.0059644	0.0166531	-0.0476137	-0.0370609	0.00171406	0.1967	0.00736015
ANKFN1	-0.0138423	-0.0688013	0.220263	0.115537	0.0599832	0.025921	-0.104493	-0.157319	-0.13051	0.0449102
ANKFY1	0.0086935	-0.0721924	0.0431993	-0.00704987	-0.0242885	-0.0568967	-0.0503701	0.00545032	-0.0425791	-0.00628841
ANKH	-0.0613682	0.0911102	-0.0215773	-0.00416001	0.00494499	-0.0234346	0.0670004	0.0575175	0.1084	0.0482588
ANKHD1	-0.098815	0.0385635	-0.0538118	0.00198736	0.00599086	-0.0206761	0.0306571	0.0351001	0.024248	0.0620012
ANKIB1	NA	NA	-0.0136795	-0.0236487	-0.0161591	0.0138172	-0.0487561	-0.0841355	0.00396422	-4.98e-05
ANKLE1	0.031642	0.0370102	0.00463408	0.0061935	-0.00714089	0.00441243	-0.171076	0.15306	-0.175579	-0.0927252
ANKLE2	-0.0338965	-0.0587321	0.0383136	0.00854201	0.0216762	-0.0415412	-0.000256704	0.0157611	0.0106503	-0.0131566
ANKMY1	-0.212085	-0.064023	-0.129884	-0.0627756	0.0247041	-0.0348581	-0.205545	-0.0548085	-0.213963	-0.0685078
ANKMY2	-0.271981	-0.024958	-0.0799378	0.00129713	0.0622555	-0.00359194	0.120854	0.0724775	0.11269	0.0571394
ANKRA2	-0.0323602	-0.0615262	-0.0539974	-0.00107639	0.00415507	0.00882555	0.0451831	-0.0247372	0.0493944	0.0691857
ANKRD10	0.0633289	-0.0295583	0.00446871	0.0116793	0.0143193	-0.0478751	-0.0195181	0.0399684	0.017219	0.017747
ANKRD11	-0.00251581	-0.0205971	0.0831511	-0.0137617	-0.0184111	-0.0078729	0.0328999	0.0614228	0.031929	0.00855496
ANKRD12	0.0585823	-0.0746992	0.00831346	0.00433767	0.0142896	-0.00773096	-0.0363352	-0.0641435	0.181973	0.0719225
ANKRD13A	-0.0856149	0.167567	-0.0414087	-0.0332517	0.0174719	-0.00107096	-0.0619371	-0.0268952	-0.041357	0.0413689
ANKRD13B	0.0035352	0.216911	-0.0793844	-0.0238883	-0.0359766	-0.0506696	-0.0764264	0.0584883	-0.153175	-0.0839018
ANKRD13C	-0.0331899	-0.183346	-0.0225439	-0.00385103	0.0110535	0.0186909	0.0736322	0.0429645	0.131428	0.070796
ANKRD13D	0.126891	0.257373	-0.0275813	-0.0163325	0.0136049	-0.0771414	-0.0714859	0.0472169	-0.138122	-0.0879108
ANKRD16	0.0586063	0.147473	-0.0264471	0.0289798	0.0710021	-0.0549732	0.0599845	0.0545799	-0.0854181	0.0120183
ANKRD17	-0.0834872	-0.045324	-0.00334311	0.0146015	0.00786971	0.0016016	0.0284906	0.0205558	0.088939	0.0668328
ANKRD18A	0.00632258	0.0323555	-0.0593193	0.0337438	0.161747	NA	-0.411949	-0.0803863	-0.188328	-0.128327
ANKRD18B	NA	NA	-0.0280353	0.00352057	-0.0112386	0.0207296	-0.194198	-0.136049	-0.136882	-0.0394558
ANKRD2	-0.00675947	0.0139291	-0.176916	0.104298	0.206637	-0.0438046	0.276377	0.215092	-0.0667255	0.109412
ANKRD20A4	NA	0.041752	-0.0319494	-0.112674	0.131171	NA	-0.258422	-0.129985	-0.113035	-0.0794855
ANKRD23	NA	0.091752	-0.0975957	-0.012721	0.0292236	0.0754282	-0.183867	-0.0811654	-0.285033	-0.0700861
ANKRD24	-0.114538	0.0549674	-0.130516	-0.0280212	-0.0242017	0.0156414	-0.0487038	0.0215096	-0.120283	-0.120916
ANKRD26	-0.0497241	-0.102505	-0.0518224	-0.0174113	-0.0205948	-0.0739863	-0.160682	-0.0784901	0.0448836	0.0516392
ANKRD27	-0.0842105	-0.0659005	0.0280325	-0.000392141	0.00896974	-0.0265752	-0.0349835	0.0810538	0.00874938	-0.00564738
ANKRD28	-0.0471254	-0.088755	-0.0870121	-0.030998	-0.0244364	-0.0293439	-0.0515667	-0.00186302	0.075003	0.0407724
ANKRD29	0.168105	-0.238789	-0.127059	0.00470654	0.0401798	-0.0028577	-0.0561754	-0.0710464	-0.0391026	0.0288987
ANKRD30B	-0.0695643	0.0906297	0.198881	0.0411371	0.0531921	-0.00965953	-0.0361901	0.0232142	-0.00784032	0.0460744
ANKRD30BL	NA	0.0353621	0.0200268	-0.00858552	0.22724	NA	-0.0221228	0.095791	0.0145325	-0.0148365
ANKRD34A	0.0118487	0.193642	-0.0739909	-0.0216876	-0.0575762	-0.0157563	0.11881	0.0463561	0.0105021	-0.0614787
ANKRD34C	NA	0.00997814	-0.0998119	0.0360771	-0.0480351	-0.0178631	0.0160777	0.0070472	0.203321	-0.091048
ANKRD35	0.178029	-0.159842	0.0742027	0.115025	0.0638215	-0.0216631	0.152401	0.0497785	-0.0485185	0.0329196
ANKRD36	NA	-0.180287	-0.137035	-0.0454268	-0.0209921	0.00189399	-0.187746	-0.012485	-0.0191989	-0.0601132
ANKRD36B	0.0418506	0.2749	0.0610259	-0.00931774	0.0616332	NA	0.0352427	0.159897	0.100867	0.263584
ANKRD36C	0.0868741	-0.280876	-0.0845604	-0.0510831	-0.0148835	0.0281907	-0.188949	-0.0119948	0.0200226	0.00607732
ANKRD37	0.254206	0.0904621	0.171854	0.0741459	0.0115678	0.0299722	-0.0166115	-0.0354339	-0.218507	0.111151
ANKRD39	NA	NA	-0.0741256	-0.019089	0.0495693	-0.0119459	-0.0460557	0.0469201	-0.0865648	-0.0881731
ANKRD40	-0.0536378	-0.0698431	0.0359142	-0.0478084	-0.0297515	-0.029547	-0.0682681	-0.200622	-0.08316	0.0200417
ANKRD42	-0.00162	0.172013	-0.020193	0.0606149	0.0492456	NA	0.102985	0.0568053	0.0845268	0.0719113
ANKRD44	-0.083386	-0.210989	-0.0714579	-0.0770319	-0.0885295	-0.0755101	-0.240053	-0.166608	-0.0958992	-0.121197
ANKRD45	NA	NA	0.138257	0.0559202	-0.0137184	0.0157873	-0.00528937	-0.116462	-0.0191144	0.136733
ANKRD46	-0.0974644	-0.0275485	-0.0612342	-0.00110712	0.0248334	-0.0193029	0.0718281	0.0206803	0.10962	0.0117641
ANKRD49	-0.0978794	0.0184541	-0.0567683	0.00745874	-0.00857259	0.00465151	-0.0464063	-0.0481957	0.0990673	0.0297098
ANKRD50	0.0677643	0.0192877	0.0501735	-0.010315	-0.0185103	-0.0180996	-0.0829469	-0.0782602	0.105306	-0.0646542
ANKRD52	NA	NA	-0.00149161	-0.0349047	-0.0465986	-0.0452193	-0.0209592	0.068352	0.0447608	-0.0465905
ANKRD53	0.00323044	-0.0528386	0.0990896	0.0276689	-0.081106	0.0244881	0.0461106	0.234743	0.0157917	0.26418
ANKRD54	-0.125494	0.25513	0.00843637	-0.00040881	-0.0247544	NA	-0.00849077	0.0527534	-0.0418254	-0.0730827
ANKRD55	0.0845658	-0.0832756	-0.15506	-0.0392887	-0.0854329	-0.0591204	-0.269038	-0.273114	-0.207274	-0.429381
ANKRD6	0.0380455	-0.152802	0.223084	0.0630797	0.0100213	-0.0430923	0.0677677	0.264567	0.237931	0.0149155
ANKRD62	-0.0638425	0.101305	-0.115286	-0.0115885	0.124275	NA	0.0317007	0.174331	0.104909	0.282572
ANKRD65	-0.00633408	0.0424703	-0.0997738	0.0248247	0.161675	0.0734359	0.32347	0.197297	0.0302587	0.312332
ANKRD7	-0.0137675	-0.0149263	-0.0381136	-0.0587589	0.026322	0.00441263	-0.0101971	-0.16954	0.0881842	0.035402
ANKRD9	-0.389994	-0.106488	-0.00342206	0.0733189	-0.000318339	-0.0464016	0.102574	0.0188833	-0.126772	0.0187447
ANKS1A	-0.0439605	0.164637	-0.0550192	-0.0339949	-0.0252487	-0.0522324	-0.179312	-0.0437902	-0.1575	-0.0619542
ANKS1B	-0.0270696	0.195149	-0.0860034	0.00416651	0.0172577	0.0456844	0.101601	0.0870553	0.10543	0.056562
ANKS3	-0.0595257	0.119243	-0.0147224	-0.00333622	-0.000716812	-0.0345053	-0.146896	0.0655023	-0.155694	-0.0697351
ANKS6	-0.135346	0.102377	-0.131545	-0.0116529	0.00536968	-0.0175648	-0.188063	-0.0118275	-0.152216	-0.0158831
ANKZF1	-0.0482438	0.319592	-0.0402656	0.0186936	0.0415003	-0.0227219	-0.192074	0.0289156	-0.133585	-0.0493406
ANLN	0.0425118	-0.25715	-0.248796	-0.170796	-0.200592	-0.0476279	-0.41142	-0.236795	-0.123371	-0.147692
ANO1	0.221098	-0.112634	-0.185198	-0.0481673	-0.00777562	0.0272732	-0.182642	-0.122123	-0.143803	0.0844193
ANO10	-0.443099	0.174445	0.0294614	0.0227894	0.0306776	-0.0029754	0.0731046	0.00196737	0.0526135	0.0432165
ANO2	0.051963	-0.0481863	0.016982	0.121483	0.0478055	0.0119747	0.0848366	0.168284	-0.00862024	0.39712
ANO3	0.00351977	-0.234459	-0.0105189	0.0462878	-0.022009	0.0121342	0.163512	0.127279	-0.00525286	0.101095
ANO4	-0.0423035	-0.030138	-0.0450649	-0.0641173	-0.0470496	-0.0546249	-0.140571	0.00821383	0.0452785	-0.0552059
ANO5	-0.176933	0.057721	-0.0504882	0.0552804	0.0292378	0.0218888	0.0494833	0.031937	0.112602	0.0904154
ANO6	0.456729	-0.181102	0.268297	0.0600559	0.0285932	-0.0366008	0.0936999	-0.00237324	0.0513908	0.21901
ANO7	-0.051281	-0.114897	-0.0528087	0.0527904	0.0121347	0.0507895	0.110206	0.26473	0.159022	-0.0722533
ANO8	-0.00229959	0.21177	-0.0567854	-0.00585828	0.0140037	-0.0105568	-0.127993	0.00077386	-0.179026	-0.0740649
ANP32A	0.0163291	-0.276019	0.0514242	0.0138862	-0.00132678	0.043312	0.0305695	-0.0673945	0.075245	0.0130026
ANP32B	0.0430333	-0.0148362	0.0832076	0.00533058	0.0451896	-0.0177867	-0.0331765	-0.222057	-0.0940006	0.169674
ANP32E	0.0125121	-0.0270099	0.112552	0.0665905	0.0368798	-0.0117306	0.0941293	-0.154228	0.0360948	0.0882337
ANPEP	-1.38728	0.0532489	-0.0162036	-0.0194338	-0.0378128	0.0289435	-0.328227	-0.0337348	-0.16059	-0.00147499
ANTXR1	0.271336	-0.636696	0.0900246	0.00823261	-0.0121737	-0.0335795	0.0220404	-0.156505	-0.0408378	0.170775
ANTXR2	0.200291	-0.0590737	0.199631	0.0626855	-0.043621	0.00507828	0.0758069	-0.11643	0.108748	0.0701533
ANXA1	1.15083	-0.0306179	0.150485	0.00218148	-0.0232373	-0.0954102	0.151727	-0.126386	0.068769	0.246245
ANXA11	-0.21921	-0.0742796	0.117173	0.0441477	0.0199187	-0.00300215	0.148646	0.0925544	0.076159	0.0646992
ANXA2	0.226542	-0.00500084	0.406066	0.134263	0.0135198	-0.0787283	0.334938	0.144633	0.273361	0.721288
ANXA2R	0.347148	-0.056328	0.00435169	-0.00283139	0.0161584	-0.00429586	-0.235711	0.0359555	-0.32107	0.11231
ANXA3	0.44123	-0.0639862	-0.228707	0.0830137	0.0401374	-0.0198164	0.123517	-0.00741357	0.0945411	0.345799
ANXA4	0.029388	-0.0698811	0.0696685	0.00259482	-0.0281703	-0.0246906	-0.130056	-0.115862	-0.0468718	-0.0228129
ANXA5	0.660933	-0.0323515	0.160759	0.0119181	-0.0384339	-0.0824219	0.0230389	-0.164611	-0.0235906	0.139824
ANXA6	0.29565	0.0983388	-0.171688	0.0061586	0.0321586	-0.0428866	0.116948	0.0655033	0.0969228	-0.00195588
ANXA7	0.0536452	-0.0565965	-0.0319689	0.0245831	0.045031	0.00482056	0.13257	0.0137606	0.0772606	0.0462672
ANXA9	0.00897323	0.00301429	-0.102564	-0.0705016	-0.0072716	0.0181812	-0.142822	-0.166914	-0.117587	-0.0948163
AOAH	NA	NA	-0.0223598	-0.15733	-0.079933	-0.0627804	-0.39495	-0.285636	-0.245899	-0.303406
AOC2	0.00694648	0.0514666	0.196567	0.122963	0.0680909	0.0280384	-0.0120594	0.155965	-0.0685366	0.0627632
AOC3	0.00395384	-0.0857024	0.138258	0.0230187	-0.0338469	-0.0193093	-0.106991	-0.0269097	0.13218	0.893553
AOX1	0.138543	-0.06391	0.0471991	0.0548818	0.0120147	0.0645337	-0.0365296	0.0775666	0.110441	0.56406
AP1AR	-0.177289	-0.0877332	-0.0838396	-0.0142369	0.000712192	0.0233267	0.0303617	0.0176873	0.0665997	-0.0713654
AP1B1	-0.0481763	-0.0484914	0.00666815	0.00554009	0.0217507	-0.0247671	0.0505426	0.0358137	-0.0181753	-0.0427688
AP1G1	-0.0267115	-0.180041	-0.00550944	-0.00386449	-0.00974568	-0.046068	-0.016992	-0.00109386	0.120333	0.0298779
AP1G2	-0.0755901	0.564306	0.091326	-0.0235479	0.123922	-0.00887991	-0.154001	0.173596	-0.146594	-0.00477993
AP1M1	0.164865	0.187233	0.00886051	0.0232251	0.0565806	-0.0145654	0.124326	0.0901468	0.0311507	0.00491757
AP1S1	-0.0942848	0.312622	0.00383252	0.00257691	0.0418294	-0.0114762	0.208099	0.144394	0.10342	-0.046597
AP1S2	0.379554	-0.540294	-0.0344943	-0.0478915	-0.0359615	-0.0478436	0.0404979	-0.116222	-0.0058984	-0.0526552
AP1S3	0.0308584	-0.0748544	0.0371843	-0.0570854	0.0103041	-0.0375493	-0.0412864	-0.0249416	-0.0114188	-0.0875232
AP2A1	-0.014512	0.518378	-0.0456207	0.00621055	0.0404317	0.0235991	0.124158	0.123144	0.036217	-0.00512527
AP2A2	-0.145967	0.412385	0.0130241	0.0212065	0.0284246	-0.0545835	0.0917076	0.118694	0.0415835	-0.0195508
AP2B1	0.1223	0.0625712	-2.8e-05	0.00333274	0.0124527	0.0428239	0.112998	0.0395262	0.131124	0.00905258
AP2M1	-0.0311716	0.546721	-0.0550656	-0.00819493	0.0289889	0.0186307	0.152147	0.106531	0.104201	-0.023653
AP2S1	0.0361887	0.119228	-0.020097	0.0108635	0.0437175	-0.0229976	0.171407	0.118588	0.026965	-0.0347245
AP3B1	0.0480656	0.0325207	0.0686982	0.00315347	-0.0281981	-0.0390127	-0.0659144	-0.118897	0.0350169	0.0276776
AP3B2	-0.0126862	0.459727	-0.0223167	0.00638903	0.0380058	-0.0353351	0.0176112	0.0851809	0.00887811	-0.0462771
AP3D1	0.143538	0.237735	-0.0142387	0.00894345	0.0301288	-0.00991318	0.0460113	0.051786	0.00272832	-0.0238815
AP3M1	0.0476257	-0.12452	0.0807709	-0.00324623	-0.0502452	-0.0332947	-0.0383454	-0.0368732	0.132084	0.033225
AP3M2	-0.0891217	-0.0237709	-0.0493236	0.0125507	0.0398527	-0.0097635	0.105564	0.0696001	0.16217	0.00598692
AP3S1	0.0814728	-0.399146	-0.000235567	-0.0107753	-0.00194038	NA	0.102874	0.0118695	0.142505	-0.0248372
AP3S2	-0.496203	-0.0215313	-0.0345134	-0.0126775	-0.00121787	-0.00906383	-0.0644074	-0.032486	-0.0297338	-0.00724907
AP4B1	-0.036836	0.116794	-0.0762479	0.0291866	-0.0200006	-0.00624537	-0.0592017	0.0363155	-0.015844	4.7e-05
AP4E1	-0.000625193	0.0420433	-0.0354747	-0.0209512	-0.0153715	-0.0250914	-0.0732012	-0.12266	0.0512107	0.0430122
AP4M1	-0.0444798	0.0159804	-0.0500304	-0.0347461	-0.0220101	-0.0728253	-0.0687021	-0.0220684	-0.161054	-0.0369834
AP4S1	-0.0696497	0.000925859	-0.00889358	-0.0408626	-0.0163676	-0.0307774	0.0262479	0.0143761	0.0323897	-0.00462335
AP5B1	-0.0992639	-0.0271536	-0.0297098	-0.0284922	-0.00589557	0.0337942	-0.0670859	0.0510887	-0.11391	-0.0670005
AP5M1	-0.25221	-0.179697	0.0153712	-0.00568308	0.0139482	0.0116845	0.0146392	0.0109748	0.133678	0.0549634
AP5S1	-0.0756573	0.205169	-0.059971	-0.0473453	0.0187724	-0.0122248	0.014276	-0.0344528	-0.0307816	-0.0319133
AP5Z1	0.00559377	0.140926	0.0918497	0.000144076	0.020882	-0.0119924	-0.0683091	0.109627	-0.144812	-0.0932421
APAF1	0.0635811	-0.100557	0.0175593	0.0174598	0.0291783	0.0190325	-0.000968068	0.0322569	0.159121	0.0243222
APBA1	-0.0145552	-0.0534052	0.0348997	-0.00012081	0.0172895	0.0199842	0.118372	0.0934829	0.0664966	0.0163761
APBA2	0.0350559	0.114867	0.0357919	-0.0383681	0.0186289	-0.0701318	0.0898799	0.0875706	0.0656139	-0.0186533
APBA3	0.0803353	0.254807	0.0978572	0.0126592	-0.0121291	-0.0208677	-0.164019	0.0873245	-0.183608	-0.0459099
APBB1	0.0277049	0.152813	-0.100029	-0.0221744	-3.74e-05	-0.0596142	0.101645	0.0678521	0.0255333	-0.0757545
APBB1IP	0.423393	0.218617	0.0723473	-0.196511	-0.202166	-0.183394	-0.44819	-0.461509	-0.179099	-0.424086
APBB2	0.0533314	-0.358125	-0.0897646	-0.0539926	-0.0193369	-0.0289879	-0.0705488	-0.0572278	-0.0152722	0.00274847
APC	-0.0311697	0.0259359	0.0151183	-0.0890861	-0.0497419	-0.00337813	-0.0527513	-0.121781	0.0308621	-0.0121897
APC2	0.0316537	0.50843	-0.0663976	0.00156964	-0.00411015	-0.0257541	0.0349657	0.0808327	-0.0972527	-0.0255872
APCDD1	0.349655	-0.151736	0.0310771	0.0283105	0.000453218	-0.00805279	-0.0825432	-0.181351	-0.222751	-0.0719962
APEH	-0.0553499	0.0741002	-0.0707057	-0.0122347	0.00566522	-0.0385719	-0.0172979	0.0258894	-0.0603667	-0.0480219
APEX1	-0.0602924	0.0879197	-0.0922053	-0.000745899	0.00899998	-0.0272798	0.0534795	-0.0430652	-0.0148968	-0.0561978
APEX2	-0.0239882	0.346415	-0.0205577	0.0175732	0.0183737	-0.000642204	-0.0324474	-0.0171166	-0.0480148	0.016483
APH1A	-0.0158202	-0.0312758	-0.0344019	-0.0108315	0.0135137	-0.0384106	-0.0347535	-0.0784829	-0.117381	-0.0704206
APH1B	0.250554	0.0180788	-0.0689445	0.00513228	0.0313208	0.0643098	0.0698621	-0.0394199	0.0180244	0.00946459
API5	0.00459563	-0.00241291	-0.0440423	0.0257931	0.00524063	0.00594166	0.0875702	0.0302052	0.171344	0.0408236
APIP	0.328328	-0.276407	-0.0748522	-0.00837086	0.00698897	NA	-0.00521545	-0.0387445	0.085142	0.0304692
APLF	-0.0108937	-0.0170869	0.0185119	-0.116462	-0.108226	0.0128368	-0.148131	-0.187992	-0.0980142	-0.0148924
APLN	0.0367889	-0.122944	0.186894	0.0694557	0.0337148	-0.00500075	-0.0729703	-0.172847	-0.218563	0.00944822
APLNR	0.396231	0.673987	0.346679	0.196952	0.0540252	0.0429676	0.792953	0.232996	0.323137	0.76084
APLP1	0.0369836	0.632637	-0.109065	-0.0110449	0.013434	-0.0113383	0.14943	0.0933578	0.0425536	-0.0314492
APLP2	-0.285669	0.176466	0.0161811	0.015498	0.0178291	-0.00944297	0.130625	0.0559645	0.117295	0.0598026
APMAP	-0.103407	0.14952	-0.0207145	0.0291914	0.0431593	-0.0197952	0.0944934	-0.0387826	0.0318035	-0.04167
APOBEC3C	0.109089	-0.0770117	0.0622571	-0.0887345	-0.0489071	0.0115928	-0.280009	-0.306433	-0.205864	-0.173978
APOBEC3G	0.54334	-0.119652	0.0583992	-0.0101645	-0.137831	-0.0615642	-0.251666	-0.312039	-0.121986	0.0562031
APOBEC4	NA	0.0437576	0.0157058	0.108291	0.0167181	0.0479985	-0.0121634	0.0219797	0.0627629	0.0878296
APOC1	0.241067	-0.279347	0.478781	-0.172103	-0.100062	-0.210555	-0.0926569	-0.433705	-0.537862	-0.350184
APOD	0.180791	0.82317	-0.171258	-0.0355491	0.0263339	-0.11647	0.0762784	-0.115281	0.00158155	0.0314538
APOE	0.170067	0.294393	0.388011	0.0954025	0.072311	-0.095248	0.0211013	-0.196043	-0.279289	-0.0936405
APOL1	0.266127	0.139377	0.239324	0.0777152	0.0160922	0.0185432	0.102307	-0.0168549	0.056108	0.13603
APOL2	0.357329	0.407524	-0.0165444	0.056634	0.0382021	0.0107334	0.148066	0.134843	0.110626	0.0389326
APOL3	0.595806	0.165382	-0.0977874	-0.0623001	-0.129654	-0.0444417	-0.261444	-0.175375	-0.227762	-0.124085
APOL6	0.186716	0.036114	0.429976	0.185097	0.073352	0.00294591	-0.012061	-0.0676041	0.00354506	0.118616
APOLD1	0.0601893	-0.0334278	0.0465471	0.145522	0.172931	-0.030736	0.155133	-0.0283651	-0.184778	1.02772
APOM	-0.225861	0.0269818	-0.0942287	-0.0273126	-0.0474391	NA	-0.196714	0.0292434	-0.214387	-0.252186
APOO	-0.157327	-0.223806	-0.0495678	-0.0289616	-0.0278478	-0.0413521	0.104409	0.0162728	0.0704975	-0.0308065
APOOL	-0.0156847	-0.0363201	-0.0479259	-0.0428571	-0.012526	0.0426482	0.0697687	-0.0178509	0.0983048	0.0556456
APOPT1	-0.0557143	-0.574671	0.0198458	-0.0163651	-0.00121938	-0.00761935	-0.0172715	0.0380807	0.0617224	-0.00562298
APP	0.332802	-0.007584	-0.0805355	-0.00949609	-0.00527716	0.0566925	0.153823	0.0605694	0.159361	0.0253548
APPBP2	-0.0557258	-0.186625	-0.0720505	-0.0191239	-0.00338243	0.0311184	0.0152358	-0.0479705	0.117826	0.0400784
APPL1	-0.134097	-0.256174	-0.0508136	-0.0116474	-0.0100453	0.0447457	0.0406836	-0.0239202	0.131015	0.0495851
APPL2	-0.592326	-0.0690424	0.0717707	0.0195513	-0.0168871	-0.0676681	-0.119755	-0.105021	-0.0886393	-0.0398273
APRT	0.0109864	0.141048	0.0132946	-0.0330168	0.0351018	-0.0439937	0.0202731	-0.0141739	-0.147886	-0.0814021
APTX	-0.0823923	-0.2492	-0.000339814	0.0109766	0.0188487	-0.0249637	-0.0291166	0.00812231	-0.03345	0.00830027
AQP1	0.115357	0.309496	0.109876	0.232906	0.0811213	-0.0808398	0.141131	0.205693	0.319907	0.31558
AQP11	-0.420017	-0.141139	0.0129807	-0.0240166	-0.0326383	-0.0212119	0.00715974	0.118099	-0.00953255	-0.102593
AQP3	0.0360884	0.0383449	0.547342	0.0208965	-0.00356253	0.0467558	0.45718	0.0510156	0.335085	0.0801465
AQP4	-0.0200758	-0.584757	0.33055	0.171679	0.0923979	0.0323684	0.247748	-0.0800535	0.099929	0.156282
AQP5	0.0331064	0.0150626	0.100468	-0.0111752	0.0134959	0.00777788	-0.0991703	-0.238747	-0.23191	0.0750096
AQP9	1.11333	0.0441052	-0.122624	0.0479527	0.0164126	0.0546994	0.120518	0.126932	0.158246	-0.0648552
AQR	-0.0410646	0.0256997	0.0253174	-0.00942529	-0.0134362	0.00528962	0.02473	-0.0547507	0.0956161	0.0659855
AR	-0.0212998	-0.0901011	0.0641855	0.0337073	0.0447586	0.124365	-0.068048	-0.217245	-0.181281	-0.112105
ARAF	NA	NA	0.0402825	0.0164436	-0.0215448	-0.0170287	-0.0537487	-0.055707	-0.071502	0.0422367
ARAP1	0.00768323	0.163736	0.0865531	-0.0273748	-0.0169661	-0.0284586	-0.188174	-0.0291858	-0.155353	-0.0764735
ARAP2	-0.0103102	-0.082528	-0.089994	-0.0436161	-0.062873	-0.0113735	-0.0765833	-0.0988421	0.0165384	0.0285415
ARAP3	0.151428	0.0247224	-0.245782	0.00439204	0.130201	0.0213227	0.108885	0.191777	0.027414	0.390338
ARC	-0.0166071	0.0517553	-0.278483	-0.243688	-0.0692569	-0.13936	0.883586	1.12953	1.22421	-0.128841
ARCN1	0.194998	0.0935228	-0.028198	-0.00698294	0.00277839	0.00466606	0.041048	-0.028646	0.116177	0.0481691
AREL1	-0.0305582	0.000199653	-0.0877305	-0.0441237	-0.0270587	-0.0533411	-0.0272369	0.0542544	0.0436458	-0.0488376
ARF1	0.0151073	0.201116	-0.0397624	0.0313632	0.0470505	-0.0320308	0.160412	0.0779178	0.0848157	0.00522662
ARF3	-0.322031	0.114928	-0.0446184	0.0002846	0.0230139	-0.0123893	0.124772	0.0545688	0.075418	-0.0166865
ARF4	NA	-0.0779176	-0.000476381	-0.028235	-0.0116926	-0.038409	0.0648103	-0.0467546	0.0877599	0.0274609
ARF5	-0.142845	0.28632	-0.0963525	0.00589064	0.0411557	-0.068061	0.182906	0.0671152	0.0264295	-0.0699826
ARF6	NA	NA	0.0107234	0.00530192	-0.00434088	-0.00477531	0.0415165	-0.0612508	0.0411779	0.0312916
ARFGAP1	0.162129	0.69342	-0.0466737	-0.0156645	0.014968	-0.0178879	-0.0484344	0.0576641	-0.10895	-0.0705159
ARFGAP2	-0.0738013	0.0503395	-0.0446912	0.00241023	0.0304807	-0.0317099	0.00209495	-0.0110695	-0.019697	-0.029969
ARFGAP3	0.812526	-0.16588	0.0456007	0.0360594	0.0169854	-0.00139306	0.0593962	0.00538129	0.0663424	0.126397
ARFGEF1	-0.146019	-0.127404	-0.0150832	-0.00861309	-0.0107329	-0.00662608	-0.031596	-0.00237306	0.08886	0.0503263
ARFGEF2	0.0771946	-0.0691665	-0.121561	-0.00304772	0.0087434	-0.0140344	0.0217187	0.061969	0.0855113	0.0296721
ARFIP1	-0.135965	-0.26899	0.0573482	0.00158381	-0.0131166	0.0168237	-0.0331215	-0.101774	0.0355431	-0.0149609
ARFIP2	-0.0357745	-0.0587605	-0.0503628	-0.000481698	0.0337304	-0.0564251	0.022314	0.0820833	0.0159414	-0.0145253
ARFRP1	-0.0474138	0.264133	0.0217709	0.00797171	0.0375717	0.00243915	-0.064009	0.0837772	-0.112377	0.00586527
ARG1	0.0193059	0.0662718	-0.220541	0.0492786	-0.0530791	0.0106754	-0.0949444	NA	0.21215	-0.0129279
ARG2	-0.00170691	0.0155387	-0.106821	0.00665501	-0.00827906	-0.153917	0.0344216	0.0504289	0.0358052	0.0191125
ARGLU1	0.0427191	-0.0876865	0.0186574	-0.0208627	-0.00688123	-0.0453812	-0.085522	0.00406515	0.0258062	0.0216521
ARHGAP1	0.0988302	0.348793	-0.0615494	-0.00135583	-0.0108811	-0.00742738	-0.00495151	0.0312115	-0.0278131	-0.0296826
ARHGAP10	0.0581604	0.0739322	0.00661711	0.0713796	0.0377414	-0.0221158	-0.0712931	-0.0548444	0.0507897	0.149703
ARHGAP11A	0.00911989	-0.051823	0.10506	-0.0830608	-0.0477573	0.0141408	-0.0124748	-0.108234	-0.0150931	-0.123378
ARHGAP12	-0.0709547	-0.36009	0.0502604	-0.00698421	0.0083343	0.0206127	-0.0689357	-0.0907154	0.0265174	0.00146064
ARHGAP17	NA	-0.0901855	0.00904088	0.00850979	-0.010385	NA	-0.179127	-0.00663415	-0.0710615	0.0345646
ARHGAP18	-0.174548	-0.0204521	0.177617	-0.00698734	0.0165327	-0.0350217	-0.150316	-0.0173422	0.0699767	0.1114
ARHGAP19	0.0343628	0.0551778	0.0971844	0.05205	0.0308284	-0.000840328	-0.0640223	-0.114362	-0.0656339	0.0573935
ARHGAP19-SLIT1	0.0329424	0.380242	-0.0861975	-0.0717658	0.0410335	-0.0484402	-0.139465	0.0589718	-0.155074	-0.0718083
ARHGAP20	-0.074062	-0.125139	-0.105315	-0.0553317	-0.085561	-0.0814651	0.00252529	0.0185504	0.0689988	-0.0797812
ARHGAP21	NA	-0.180623	-0.0402029	-0.0255297	-0.00509968	-0.0821698	-0.0532303	-0.00126812	0.0621404	0.00587345
ARHGAP22	0.120346	-0.0185358	-0.0720561	-0.0666137	-0.0583235	-0.0692823	-0.320377	-0.0864725	-0.176913	-0.195997
ARHGAP23	0.415547	0.245615	-0.0327888	-0.0312475	-0.0386585	-0.0461054	-0.0708246	0.00229964	-0.107657	-0.0401191
ARHGAP24	0.286001	-0.256886	0.0877595	0.0145169	-0.0180414	-0.0473551	-0.0442646	-0.0610095	0.0264907	0.0130093
ARHGAP25	0.547706	0.113648	0.0253784	-0.0953186	-0.100357	0.00429589	-0.0364604	0.0558338	0.0812607	-0.243763
ARHGAP26	-0.00625755	0.173249	-0.11423	0.0103369	-0.000179838	-0.0254102	0.0803072	0.0999892	0.126773	0.0657416
ARHGAP27	0.198772	0.0556878	-0.00472322	-0.0830199	-0.0376211	-0.0264138	-0.219265	-0.0587401	-0.200953	-0.144093
ARHGAP28	0.147636	-0.0682186	0.225622	0.0828816	0.0659398	-0.0179164	0.0536312	-0.0471972	0.0930049	0.123966
ARHGAP29	0.0293071	-0.115792	-0.0056524	-0.0102756	-0.00939556	-0.0385437	-0.0210593	-0.1197	-0.0295751	0.208728
ARHGAP30	0.358279	0.185393	0.104228	-0.0550604	-0.123839	-0.0112941	-0.192175	-0.223352	-0.113594	-0.137834
ARHGAP31	0.0768772	-0.0255717	0.156327	0.0460023	-0.0442249	-0.0576879	-0.167953	-0.19857	-0.181306	-0.0444902
ARHGAP32	-0.259963	0.0340136	0.00829139	0.0335433	0.0334093	-0.00286428	0.148114	0.081426	0.134093	0.0832226
ARHGAP33	-0.127535	0.0580439	0.110843	0.0187497	0.0616952	0.0120151	0.0171699	0.0935916	-0.072724	-0.0599957
ARHGAP35	-0.00580071	0.0402256	0.0380201	-0.0109465	-0.0296971	-0.0267054	0.0307966	0.0218718	0.0436566	0.015163
ARHGAP36	-0.0208904	-0.0409276	0.376703	0.0463488	0.0268218	-0.0257744	-0.138188	-0.280977	-0.200401	-0.20308
ARHGAP39	NA	NA	-0.0309686	0.050944	0.0652954	-0.0255688	0.113606	0.0983922	-0.0538041	-0.00781175
ARHGAP4	NA	NA	0.131071	-0.0610808	-0.0568859	-0.02498	-0.247824	-0.124277	-0.238107	-0.25041
ARHGAP42	-0.0639764	-0.140622	0.230893	0.0348897	-0.0452019	-0.024551	-0.157686	-0.235812	-0.0748216	0.0810782
ARHGAP44	-0.755395	0.052913	-0.113121	0.0085074	0.0111854	0.0155029	0.0985162	0.122577	0.0872062	-0.0339372
ARHGAP5	-0.0790422	-0.489768	0.14193	0.0239111	0.0115721	0.00563857	-0.00010591	-0.144217	0.116107	0.0780445
ARHGAP6	0.0146044	0.00440588	0.401174	0.0690964	0.0722245	-0.04051	-0.0912309	0.176058	0.0989136	0.181252
ARHGAP9	0.499748	-0.0488556	0.0301227	-0.0185202	0.00650798	0.0365671	-0.0960245	-0.0601119	-0.0929599	-0.00408003
ARHGDIA	0.0189683	0.648483	0.0225551	0.0211771	0.049527	-0.0595313	0.107547	0.0597578	0.0065186	-0.0706222
ARHGDIB	0.665496	-0.108605	0.0334964	-0.0585336	-0.0610429	-0.0691715	-0.230783	-0.307696	-0.174298	-0.293199
ARHGDIG	-0.0397374	0.763217	-0.0674333	-0.009017	0.0545659	-0.0324481	0.0880329	0.103216	-0.0574934	-0.105878
ARHGEF1	0.113453	0.0800745	0.0176292	-0.0112766	-0.005853	0.0113135	-0.280996	-0.00437178	-0.191396	-0.0746082
ARHGEF10	0.226626	-0.177921	-0.00677464	-0.0181203	-0.0712951	-0.0887418	-0.171398	-0.0715545	-0.106348	0.0270652
ARHGEF10L	-0.146526	-0.0211622	-0.000943825	0.0118986	0.0310421	0.0146544	-0.0186951	0.0695906	-0.0753869	0.0514458
ARHGEF11	-0.0861965	0.186679	-0.0708595	-0.0144868	0.0051926	NA	0.0496137	0.0667858	0.0420983	0.000794793
ARHGEF12	-0.161081	-0.164049	0.0445135	0.0135061	0.00939733	0.00280234	0.0506347	0.00181957	0.0969841	0.074476
ARHGEF15	0.0179293	-0.0262509	-0.241125	-0.0775741	-0.130836	0.00421973	-0.196471	-0.0898238	-0.222227	-0.261042
ARHGEF16	-0.261036	0.146542	0.246407	0.0451741	0.0863077	0.0193626	-0.0139336	0.109474	-0.0306543	0.144723
ARHGEF17	0.0812232	0.425942	0.0142201	0.0331058	0.0288383	0.00102534	0.0639777	0.0788832	-0.0257844	0.0360467
ARHGEF18	-0.0287146	-0.0366424	0.01655	-0.00773203	0.011404	-0.0425129	0.0531527	-0.00285931	-0.0714467	-0.0981788
ARHGEF2	0.0715659	0.279441	-0.0994898	-0.0600646	-0.0314053	-0.00595349	-0.0134595	-0.0154396	-0.0596323	-0.0537398
ARHGEF25	0.0232313	0.263731	-0.0384909	0.0320077	0.0491451	0.0296497	0.129608	0.124428	0.0386035	-0.00586462
ARHGEF26	-0.0373126	-0.163449	0.297472	0.0814292	0.0305318	-0.0636551	-0.0222738	-0.189718	-0.157474	-0.0331265
ARHGEF28	-0.0976923	0.0359877	0.174897	0.0948571	0.0700903	-0.0470596	0.114968	0.175016	0.224091	0.169285
ARHGEF3	0.557127	0.186105	-0.0160821	0.0575745	0.0549925	-0.0267149	0.19215	0.141409	0.205003	0.0717926
ARHGEF33	NA	-0.0346105	-0.107543	-0.0580027	-0.0146343	NA	-0.145693	0.0129546	0.00159182	-0.0159236
ARHGEF37	-0.48344	0.261543	-0.209167	-0.0470772	-0.0666496	-0.00272795	-0.184342	-0.0746183	-0.0999119	0.00804457
ARHGEF4	0.0062812	0.161472	-0.0536034	-0.0254536	-0.00212831	-0.0541605	-0.0530507	0.0274826	-0.126094	-0.054116
ARHGEF40	-0.0990675	0.00232121	0.215977	0.00432986	-0.0203408	-0.0141881	-0.180929	-0.123802	-0.228689	-0.0527182
ARHGEF6	0.443022	-0.248043	0.136907	-0.0147544	-0.0474316	-0.0158155	-0.0573194	-0.159117	-0.0497005	0.0171551
ARHGEF7	-0.0573084	0.167347	-0.0450882	-0.0308886	-0.00488606	-0.0329492	0.0955067	0.109478	0.136522	0.0355135
ARHGEF9	-0.0957679	0.16601	-0.0970641	0.00596567	0.0181251	-0.0245044	0.102632	0.0758695	0.122914	-0.0153169
ARID1A	0.0257298	-0.071345	0.0254146	0.0214593	0.00699107	-0.0128006	0.0373836	0.0135391	-0.00459663	0.000866386
ARID1B	-0.0808916	0.0403656	0.0176414	0.0129352	0.00484146	0.0224238	0.0921011	0.0568743	0.0228071	0.0380224
ARID2	-0.0670941	-0.0583204	-0.023169	0.00866937	-0.0212393	-0.0269603	-0.0600283	-0.0627954	0.0316362	0.0337388
ARID3A	0.36472	0.234602	0.151682	0.0046991	0.0469453	-0.016948	-0.0109753	0.0455935	-0.0380839	0.0507882
ARID3B	6.21e-06	0.0961872	-0.0387482	-0.0684405	-0.0641753	0.0484522	-0.273641	-0.0975437	-0.16049	-0.165449
ARID3C	NA	-0.0549759	0.116141	0.0355737	0.0198081	NA	0.340702	NA	0.254003	0.196193
ARID4A	-0.0459982	-0.0849764	-0.061368	-0.0117604	-0.0244385	-0.0245943	-0.0596212	-0.0591746	0.182693	0.00353375
ARID4B	0.0494141	-0.00911254	0.00496088	-0.00706636	-0.00515203	-0.0137544	-0.0542777	-0.0626335	0.0785181	0.0513848
ARID5A	0.127375	0.172592	0.242952	0.185992	0.27137	0.0180206	0.463575	0.485799	0.356502	0.380975
ARID5B	0.236244	0.226914	0.106137	0.0618063	0.054105	0.0182108	0.237075	0.178243	0.301922	0.157953
ARIH1	0.10559	-0.166071	-0.0232448	0.00261127	0.00732076	-0.0417064	0.00881948	0.0301595	0.125202	0.0467059
ARIH2	-0.0255205	0.0609566	-0.0972447	-0.0424718	-0.0158686	-0.0170464	-0.117627	-0.0111886	-0.0471782	-0.0500907
ARIH2OS	NA	NA	0.11706	0.0192704	0.0549581	0.0165196	-0.142714	0.063652	-0.109823	-0.0933687
ARL1	0.136088	-0.0341918	-0.0361445	0.0106319	0.0177709	0.0139502	0.132047	0.027692	0.212507	0.0367925
ARL10	-0.295424	0.132785	0.109803	-0.0220087	-0.000566436	-0.0522171	0.0232362	0.0784949	0.126718	0.0180557
ARL13B	0.0656991	-0.14954	0.0247782	0.022274	-0.00784224	-0.0460792	0.000683509	-0.0737207	0.0549707	0.0885047
ARL14EP	0.103562	-0.142887	0.0115767	0.0143415	0.00936171	0.00983966	0.0892695	0.0210596	0.177715	0.0614558
ARL15	-0.128688	0.040966	0.0940347	0.042919	0.0292694	0.014949	0.068737	0.101063	0.193583	0.0736264
ARL16	-0.149439	-0.208125	0.0350191	-0.0119883	0.0140985	-0.0208169	0.0547545	0.036252	-0.0372057	-0.0118739
ARL17A	-0.020594	-0.0429512	0.08834	0.0566897	0.0430481	-0.0189907	0.00500358	0.0142129	0.174579	0.185831
ARL17B	NA	NA	-0.00398889	0.0614021	-0.0371007	0.0672472	0.237133	0.077312	0.288937	0.441143
ARL2	-0.228396	-0.119675	-0.0258934	0.0453707	0.0731495	0.0166337	0.18373	0.153907	-0.00444055	0.00833905
ARL2BP	0.231056	-0.0360073	-0.0576529	-0.0118342	-0.0148858	-0.0349662	0.144607	0.00452976	0.0112464	-0.176422
ARL3	0.0498104	0.318661	-0.0377337	-0.00434511	0.0102153	-0.001566	0.0799627	-0.0163312	0.0611958	0.00515568
ARL4A	-0.155167	0.0238144	0.0687753	0.0960496	0.0665011	NA	0.225366	0.0873902	0.222916	0.153427
ARL4C	0.155887	-0.148788	-0.105139	0.00438371	0.0191264	-0.0267834	0.0588884	0.0211759	0.0898636	-0.0773124
ARL4D	-0.0253813	-0.000264581	-0.16754	-0.166602	-0.12261	-0.0751574	0.00518023	-0.0469226	0.00613567	-0.271772
ARL5A	0.149978	-0.130007	0.0450657	-0.0220175	-0.0174551	-0.00146997	0.0357249	-0.0370732	0.0612096	0.0359947
ARL5B	0.208896	-0.163064	0.078353	0.0262193	0.0472806	0.0404026	0.136066	0.0491708	0.260339	0.0772152
ARL6	0.0527655	-0.0591944	-0.117716	0.0265983	0.0530199	0.0375296	0.142998	0.139596	0.133297	0.0905464
ARL6IP1	-0.17708	-0.0983846	0.0113076	0.0347078	0.0155305	0.0501662	0.0960085	0.0324192	0.17663	0.0574743
ARL6IP5	0.0863194	0.0106943	-0.0693405	0.00151465	0.00974022	0.045596	0.123953	0.0131228	0.109334	-0.0114344
ARL6IP6	-0.0579342	-0.187983	0.0758583	0.0168855	-0.00515612	-0.00572478	-0.022089	-0.054308	-0.0934176	0.0285468
ARL8A	-0.0133317	-0.0122506	-0.0315597	-0.0305865	0.00720684	-0.0103561	0.0977319	0.025727	0.0268996	-0.042496
ARL8B	0.0177023	-0.226987	-0.0186189	-0.00529558	0.00604005	-0.00691959	0.104082	0.000546486	0.146842	0.00810699
ARL9	0.136214	-0.0456527	-0.123515	-0.00574398	0.0164456	0.0810557	0.240358	0.0613748	0.0922697	0.0613508
ARMC1	-0.0116997	0.206209	-0.0549375	-0.0150713	-0.0250857	0.0249294	0.015722	0.00386929	0.131826	0.0104629
ARMC10	0.0182762	-0.361766	-0.0162857	-0.00673855	-0.0401154	-0.00417444	0.0600314	0.00237762	0.0533351	-0.0751395
ARMC12	-0.117084	-0.158841	0.0365421	0.0838415	0.0949584	0.0152807	0.0726806	NA	-0.0968914	-0.0586114
ARMC2	-0.00248965	-0.131022	-0.0512712	-0.0328257	0.022025	-0.0541637	-0.0254576	-0.0519899	-0.0302458	0.0361551
ARMC3	NA	NA	0.142852	0.0801719	-0.0220513	0.0545771	0.138803	0.216002	0.212089	0.050646
ARMC5	0.018838	0.234418	-0.00110377	-4.15e-05	-0.00688452	-0.0400182	0.0905852	0.00536005	-0.0660495	-0.0703867
ARMC6	-0.0463543	0.147618	-0.0400385	0.00106624	0.0247249	-0.0708121	0.0380995	0.0678038	-0.0209696	-0.137428
ARMC7	-0.166549	0.321722	-0.101034	0.0172692	0.0181601	0.000508972	0.0369898	-0.0292201	-0.132501	-0.082379
ARMC8	0.00976449	-0.210516	-0.0501771	-0.0189998	-0.012453	-0.0408191	-0.012108	0.0056793	0.0801621	0.0512915
ARMC9	-0.0349211	0.0928166	0.0627413	0.0144944	0.00733482	0.00148522	0.0295459	0.0983817	0.00183305	0.0504897
ARMCX1	0.161491	-0.0718383	0.0339831	0.00446339	0.0059761	0.0391144	0.0919455	0.0478287	0.0774303	0.0414177
ARMCX2	0.383596	0.0515501	0.0570704	-0.0302722	-0.0256557	-0.032699	0.0729827	-0.0179587	0.0454289	-0.0124153
ARMCX3	0.242168	-0.4803	-0.0680845	-0.0337588	-0.0262585	-0.0291944	0.0270937	-0.0185436	0.0559465	-0.0370798
ARMCX4	-0.0785591	0.0859369	-0.0532796	0.00749102	0.0247108	-0.0176936	-0.0152892	0.0566411	0.0370511	0.0287247
ARMCX5	-0.0546326	0.00388255	-0.176469	0.0176834	0.0698549	-0.0202913	0.0194363	0.0273644	0.0576692	0.0517328
ARMCX6	NA	-0.0569246	0.103925	0.0162771	0.0400227	NA	0.0142648	-0.0303361	-0.0324572	-0.0704936
ARNT	-0.114987	-0.170496	-0.0180317	0.016032	-0.0251479	0.0154196	-0.0841333	-0.0681881	-0.0358069	0.0168466
ARNT2	0.010531	0.0984359	-0.0323473	0.00777668	0.0138813	0.000667647	0.0549015	-0.00309321	0.00633049	-0.0361003
ARNTL	-0.0297817	-0.218096	-0.0217719	0.0224067	-0.00356681	-0.0728429	0.0987615	0.143204	0.168812	0.169642
ARNTL2	0.019859	-0.0979367	-0.0492245	-0.0439026	-0.0561049	-0.0805628	0.0234189	0.0476714	0.139452	-0.0215964
ARPC1A	NA	0.0272472	-0.0449733	-0.00303174	0.0156658	-0.0324746	0.0970611	0.0496858	0.0467321	-0.027902
ARPC1B	NA	NA	0.195583	-0.0322702	-0.0609704	-0.0439473	-0.11223	-0.108989	-0.163761	-0.0967653
ARPC2	0.132536	0.0586816	0.0163901	-0.00632045	0.0188311	-0.0269645	0.108111	0.0384412	0.106191	0.0235364
ARPC3	0.144561	-0.295164	0.00508115	-0.0308247	-0.029327	-0.0653894	0.110994	-0.0610754	0.11594	-0.0172636
ARPC4	0.0176989	0.310046	-0.0103363	-0.0188308	0.00951142	-0.0503059	0.049264	0.00340656	-0.0171738	-0.0592465
ARPC5	0.0630782	-0.256076	0.0276993	-0.0318041	-0.00947827	-0.054453	0.0187224	-0.0588247	0.0532057	-0.0422739
ARPC5L	0.175482	0.0665861	-0.0688852	-9.32e-05	0.0174245	-0.0603837	0.101207	-0.0106042	0.0169744	-0.0442699
ARPP19	0.0952583	-0.134996	-0.00777713	-0.0762351	-0.0557393	-0.000710259	0.0746896	-0.0513869	0.0983829	-0.0018323
ARPP21	0.00764771	-0.0504301	-0.0167333	0.000777437	0.0109429	0.00709846	0.0711218	0.117234	0.0036306	-0.0135019
ARRB1	-0.184701	-0.00122979	0.0021037	-0.0330534	-0.0167081	-0.0234134	0.00273338	0.00843443	-0.0248659	-0.0306822
ARRB2	0.140779	0.124572	0.00515488	-0.00831034	0.0261664	-0.0225138	0.0345496	0.0670261	0.0620984	-0.0724827
ARRDC1	-0.0134218	0.0649521	-0.00957896	-0.0238581	0.0116524	-0.0162918	-0.105265	0.103281	-0.173872	-0.0789396
ARRDC2	0.170168	0.263579	-0.0726823	0.0229886	0.0204894	-0.0453531	-0.102937	-0.0648964	-0.168212	0.0436237
ARRDC3	0.174024	0.220833	0.329661	0.159443	0.142984	0.103582	0.310125	0.238379	0.455247	0.372704
ARRDC4	-0.375255	-0.0449475	0.202162	-0.0247957	-0.0316417	0.0352177	0.265727	0.101097	0.22288	0.276043
ARSA	0.0730949	0.00864687	-0.0026861	-0.0183369	0.0430121	0.0130962	-0.0677547	0.100626	-0.151237	-0.120922
ARSB	0.143851	-0.141059	0.00536453	-0.0205909	-0.0112159	0.0213714	-0.0190194	-0.0466678	-0.0304928	-0.00413947
ARSD	-0.320606	0.0715496	0.064875	0.0554639	0.0503736	0.0397195	-0.0362637	-0.0220513	-0.0528027	0.150515
ARSE	-0.223539	-0.0394997	-0.128887	-0.0578552	-0.0932979	-0.0599584	-0.235083	-0.130913	-0.322097	-0.254499
ARSF	0.0447182	-0.261184	-0.0506436	0.0166912	-0.0293777	-0.00526434	-0.211323	-0.281561	-0.267591	-0.279787
ARSG	0.0775862	-0.0514678	-0.129664	0.00449335	0.0521838	-0.033976	0.0478093	0.0641276	0.0405639	0.124793
ARSI	0.0240508	0.0411636	-0.0714436	0.0759834	0.0544075	-0.0398436	0.0485453	0.0231889	-0.125475	0.166866
ARSJ	0.286117	-0.0203408	0.12628	0.0524309	-0.0597056	0.00247428	0.0250957	0.0983405	0.18784	-0.0909874
ARSK	0.00756554	-0.0374969	0.0886375	0.0358472	0.00641545	0.0553951	0.142151	0.116981	0.159592	0.101643
ART3	0.583218	-0.195989	-0.272473	-0.0380351	-0.0962576	0.00624746	0.0787344	-0.0150833	0.0784404	-0.0393829
ARTN	0.0495438	0.0196669	-0.0730176	0.0957618	0.102433	0.0178304	-0.0301956	0.163071	-0.149698	0.0601458
ARV1	-0.240569	-0.0274914	-0.0867275	-0.0131746	0.00435987	-0.0212074	0.0448792	-0.0547946	0.0729516	-0.0648554
ARVCF	-0.00855253	0.109486	-0.00206589	0.0190664	0.03984	-0.0105698	-0.0815135	0.0413938	-0.115942	-0.0111269
ARX	-0.0215237	0.0425992	-0.000807279	-0.00688846	0.0042352	-0.00516175	-0.0196033	-0.01457	-0.100834	-0.197855
ASAH1	-0.0757069	-0.161343	0.060202	-0.0125538	0.0100489	-0.00552126	0.0486047	-0.047761	0.048773	0.000820504
ASAH2B	NA	-0.0247676	-0.111134	0.0308924	0.0488417	NA	0.00586798	-0.0833554	0.0292	-0.0433737
ASAP1	0.422417	-0.0139555	0.00836274	-0.0034361	-0.00268687	-0.0717578	0.0263286	0.0248736	0.117107	0.0266504
ASAP2	-0.211041	-0.336079	-0.0922057	-0.0575559	-0.0534427	-0.0462046	-0.045757	-0.0924778	-0.0880565	-0.0758822
ASAP3	-0.560889	-0.000182276	0.315889	0.164604	0.0940378	0.0472253	0.186685	0.153905	0.0937354	0.223165
ASB1	-0.0779685	0.00313011	0.0405789	-0.00404665	-0.00690366	-0.0138088	0.00770131	-0.0216933	-0.0225371	0.00285734
ASB13	-0.606896	0.0408773	-0.225331	-0.0430593	0.0338047	0.00956428	0.0154927	-0.0998272	-0.065453	-0.0348604
ASB14	-0.0140039	-0.0903957	-0.0545084	-0.0600231	-0.0871965	0.0701194	-0.164377	0.0794028	-0.0508923	0.0848798
ASB16	0.60858	-0.126723	-0.110821	-0.0418078	0.135293	0.0930016	-0.291452	0.0498872	-0.174054	-0.0818948
ASB2	-0.0168707	0.0345921	-0.105289	0.109144	0.0529683	-0.101289	0.0222588	0.0988795	0.051182	-0.0458459
ASB6	-0.0122682	0.0631361	-0.0100763	0.0169993	0.0511148	-0.045507	-0.0108907	0.02306	-0.071017	-0.0147426
ASB7	-0.0341039	0.0364946	-0.0172288	0.0109333	-0.020942	-0.0183885	0.0108026	0.0121489	0.0721729	0.0064472
ASB8	-0.0883381	-0.00734245	-0.110795	-0.0118344	0.023569	-0.00554774	0.0703971	0.00678199	0.0553151	0.0112809
ASCC1	0.14827	-0.215236	-0.0119846	0.0170318	0.00296658	-0.00383002	-0.048998	-0.00398582	0.0117639	0.0476391
ASCC2	-0.160415	-0.0164351	0.0746264	0.026189	0.00501752	-0.0608583	-0.130452	-0.0521646	-0.09799	-0.0914917
ASCC3	0.283046	-0.155069	0.0466421	0.00927618	0.0214302	0.023178	-0.0489103	-0.0477368	0.0538582	0.0731362
ASCL1	0.0583278	-0.584952	-0.0108159	-0.0215652	-0.0619543	-0.0707156	-0.108052	-0.185222	-0.185429	-0.0992216
ASCL2	-0.00579106	-0.0455412	0.290427	-0.0212625	-0.116351	0.0387086	0.147156	NA	-0.0870078	0.0243951
ASCL5	NA	NA	0.0818103	-0.018103	-0.0970967	0.000700542	0.0899443	0.165132	-0.183849	0.10956
ASF1A	-0.0118013	-0.369246	0.114148	0.00732122	-0.000597828	-0.0015412	-0.038606	-0.140417	0.0103207	-0.0208468
ASGR1	0.217323	-0.0609678	-0.0138815	0.0470311	0.104899	0.0181362	0.200789	0.085435	-0.0332154	0.101805
ASGR2	0.151927	-0.0358665	-0.160698	0.00983134	0.0186754	-0.0113271	0.0267062	0.0399934	-0.0229085	-0.0998132
ASH1L	-0.0350321	0.0169628	0.0120537	-0.013922	0.00462882	0.0137274	0.0466155	-0.00717154	0.0999152	0.0492244
ASH2L	-0.0306057	0.096386	-0.118248	0.00653436	0.0168751	-0.0463909	0.0991525	0.0150862	0.128497	0.0311184
ASIC1	-0.0106315	-0.298004	-0.013343	-0.0567969	-0.0220056	-0.00537159	-0.0153555	-0.0168	-0.0545157	-0.0149615
ASIC2	-0.0259709	0.409104	-0.0459334	0.00388999	0.0252044	0.0101138	0.0742388	0.137698	0.0366814	0.000222066
ASIC3	-0.0247732	0.334179	-0.0727336	-0.00701444	0.057165	-0.0109835	-0.103766	0.165029	-0.115599	-0.0156099
ASIC4	-0.00497361	-0.0548807	0.147061	0.00323955	0.0606736	0.0105249	-0.0673881	0.0420226	-0.212707	-0.0826385
ASL	-0.110661	-0.0956443	-0.0982589	-0.00426428	0.0689555	-0.0799397	-0.0280906	0.0619628	-0.101064	-0.0311196
ASMTL	-0.00277139	0.305165	-0.134936	0.0796857	0.0804675	0.0200279	0.0427568	0.0521674	-0.0259177	-0.0288835
ASNA1	-0.0188738	0.00833311	-0.0314414	0.00603885	-0.000191471	-0.0241535	0.116769	-0.00782651	0.00786333	-0.0289002
ASNS	0.264203	0.141842	-0.0803083	0.0103149	0.0141023	-0.00848986	0.00717168	0.0555162	0.132296	-0.011131
ASNSD1	0.0917373	-0.335277	-0.0197256	-0.00921928	0.00187088	-0.0161197	0.126992	0.0307699	0.217248	0.0880787
ASPA	-0.315938	-0.104912	-0.211519	-0.172897	-0.130943	-4.08e-05	-0.441991	-0.253502	-0.18053	-0.0956054
ASPDH	-0.0119139	0.223751	-0.0710167	-0.0397992	-0.0479591	-0.0185792	0.061267	0.0761986	-0.0314018	-0.0797457
ASPH	0.301599	-0.484998	0.0669211	0.0629824	0.0371961	0.0227492	0.0379878	-0.0734729	0.00144948	0.111129
ASPHD1	0.0148515	0.322671	-0.00891622	-0.041665	-0.00365889	-0.037202	0.060936	0.00170023	-0.0954919	-0.0834616
ASPHD2	0.502485	0.155415	-0.041254	-0.0134144	0.00713116	-0.0394599	0.11594	0.0655502	0.0192806	-0.051002
ASPN	0.0109771	-0.0388346	-0.229039	-0.158065	-0.244416	-0.0563368	-0.273852	-0.252601	-0.0931788	-0.0654213
ASPRV1	0.00345078	-0.0042838	0.0264802	-0.0276588	-0.0225506	0.0610479	-0.0636655	0.0539124	-0.160056	0.0518819
ASPSCR1	-0.0178838	0.204179	-0.0607139	-0.00675146	0.0148064	-0.060369	-0.252056	-0.0263477	-0.261156	-0.148142
ASRGL1	NA	NA	0.0729281	0.0120837	-0.00739574	-0.0425451	-0.0344056	-0.174721	-0.182446	-0.0801609
ASS1	0.649803	0.155598	-0.0131838	0.0374897	0.076247	-0.0909939	0.130804	0.0439348	0.0472469	0.135986
ASTE1	-0.309032	-0.000102537	-0.0907425	-0.0383826	-0.0379272	0.0234892	-0.192533	-0.0821898	-0.0521659	-0.0807748
ASTN1	-0.024307	0.158445	-0.00213135	0.0197438	0.0333312	-0.0118247	0.0753313	0.0521274	0.0479497	-0.00568005
ASTN2	-0.0254287	0.226678	-0.065762	-0.0142727	0.00130354	-0.0390421	-0.0619206	0.0266431	-0.0327829	-0.0504499
ASXL1	NA	0.144908	0.0398283	0.00717221	0.0122282	-0.00551406	-0.0045524	-0.00977313	-0.010139	-0.00554328
ASXL2	0.0691399	-0.107056	0.0753876	-0.00426349	-0.0164142	-0.033738	-0.0569572	-0.0827537	-0.0138957	0.00847911
ASXL3	-0.0175908	-0.0839203	0.0371367	0.0187181	0.013623	-0.0462183	0.0414132	0.0525148	0.113689	0.0406002
ATAD1	-0.114882	-0.292253	-0.0710995	-0.0158377	0.0171692	0.00531426	0.101078	-0.0111916	0.154584	0.0172245
ATAD2	0.114664	-0.113613	0.0432853	0.0871128	0.0699774	-0.013111	0.100544	0.0908837	0.14224	0.224671
ATAD2B	NA	NA	0.0442211	-0.00488183	-0.0148151	-0.0635829	-0.150352	-0.059302	-0.0176488	0.0636851
ATAD3A	-0.0371731	0.234319	0.00553575	-0.00531432	0.0719239	-0.0424106	-0.0472715	0.0705096	-0.109082	-0.0463162
ATAD3B	0.02628	0.127256	0.0528177	-0.0452276	0.0121554	-0.0356613	-0.135712	0.139557	-0.155002	-0.0379135
ATAD3C	0.00958649	-0.000732563	0.162271	0.12601	0.151486	-0.0120872	-0.141412	-0.0199269	-0.115791	-0.0340697
ATAD5	-0.0120707	0.0348168	-0.0698332	-0.00394502	0.0370316	-0.00649261	-0.056833	-0.0408522	0.0967016	0.0256479
ATAT1	-0.0136969	0.209187	0.00473787	0.028	0.0433311	0.0355384	0.0523668	0.0604945	0.0419894	0.00974596
ATCAY	0.0333662	0.273771	-0.0569459	-0.0216823	0.0115771	-0.0110293	0.115629	0.106516	0.117445	-0.0300016
ATE1	-0.0272716	0.0218783	0.0100371	-0.00105115	0.0050778	0.0601399	0.048431	0.0104999	0.073881	0.0316483
ATF1	-0.118568	-0.0843724	0.110556	0.00576618	-0.0164004	-0.0165982	-0.0302481	-0.0173544	0.0390289	0.0758122
ATF2	0.0513258	-0.122693	-0.0179146	-0.000774819	-0.00320676	0.0348722	0.0513364	0.0353255	0.144359	0.049688
ATF3	0.652147	-0.0796985	0.278844	-0.0142415	0.0119175	-0.0797608	0.0663848	-0.0253754	0.248149	0.366173
ATF4	0.145126	-0.121677	0.000136565	-0.048077	-0.0403436	NA	-0.0183631	0.0222772	0.0288247	-0.0871402
ATF5	NA	NA	0.17385	0.0241313	0.0398451	-0.0124357	0.126722	0.00235649	0.00128343	-0.0632
ATF6	0.184286	-0.166523	0.0363871	0.0128021	0.0276686	0.0205964	0.080526	-0.0292143	0.137629	0.0827829
ATF6B	NA	NA	-0.0273405	0.00923141	0.026569	0.0358539	-0.0322001	0.0628047	-0.0503981	-0.00711712
ATF7	NA	NA	0.0112299	0.0193122	-0.0323981	0.0335438	-0.0652977	-0.0753362	-0.00365792	0.0450167
ATF7IP	0.0754873	-0.0497803	-0.044823	-0.00708022	-0.010261	-0.00717778	-0.0615728	-0.129777	0.0114229	0.018333
ATF7IP2	0.0538159	-0.0397686	0.132903	0.0207106	0.028021	-0.000753933	-0.0282689	-0.0561582	0.0715652	0.00398528
ATG10	-0.0968761	-0.00197875	-0.107863	-0.0438191	-0.0228455	-0.0435438	-0.0844364	-0.100353	-0.0479482	-0.0615539
ATG12	0.00211883	0.2775	-0.00348569	-0.0161489	-0.0174532	0.0156732	0.0190324	0.0375972	0.104625	-0.00314462
ATG13	-0.00921961	0.166623	-0.0793147	0.000753417	0.0160897	-0.0141911	0.0691849	0.0325099	0.0357597	0.0190841
ATG14	-0.126758	-0.000383191	-0.0757772	0.0169086	0.0255715	0.021974	0.0479741	0.0283606	0.0580723	0.038453
ATG16L1	0.0176811	0.23544	-0.162871	-0.0434613	-0.00211395	-0.0500954	-0.0371083	0.0343938	0.0447176	-0.0475472
ATG16L2	0.0161724	0.0506711	0.0388191	-0.0533173	-0.0377178	-0.0675824	-0.223883	-0.0586776	-0.197871	-0.0737679
ATG2A	-0.0254716	0.365267	-0.0307784	0.00620402	0.0348461	-0.0509506	-0.0575431	0.05076	-0.122472	-0.0444754
ATG2B	0.0247905	0.00661253	-0.104619	-0.0174582	-0.00532672	-0.0268438	-0.00104075	0.0469012	0.0823266	0.00060947
ATG3	0.0625445	-0.0770557	-0.00705263	-0.00678898	-0.0105404	0.0104062	-0.00250817	-0.0789805	0.0422761	-0.042118
ATG4A	0.0596651	-0.0249316	0.0259594	0.00193838	0.00540003	-0.0111167	-0.11919	-0.0904315	-0.0497522	0.0931329
ATG4B	-0.154177	0.252716	0.0243856	0.0299253	0.0291351	0.012477	-0.0223423	0.0897401	-0.0491937	0.0273373
ATG4C	0.13976	-0.194774	-0.0739037	-0.0388668	-0.0830143	-0.0143493	-0.12395	-0.13397	0.072611	-0.000105704
ATG4D	-0.346107	0.136909	-0.139408	-0.0336312	-0.025387	-0.0744993	-0.0200629	0.116302	-0.0843315	-0.0151486
ATG5	-0.182586	-0.170236	-0.032444	-0.00352163	0.00965437	-0.0467396	0.0220026	0.0306856	0.136863	0.0423359
ATG7	0.122591	0.0216861	-0.00784543	0.00740804	0.0187183	-0.094036	0.0109883	0.0370705	0.0437026	0.0142605
ATG9A	-0.156643	0.333789	-0.0440652	-0.00158396	0.0248371	-0.0313453	0.110737	0.103946	0.0257549	0.0159743
ATG9B	0.0555674	0.0876013	0.00761797	0.0329073	0.0325946	0.0179849	0.121344	0.248294	-0.0508282	0.0509771
ATIC	-0.0469662	0.120092	-0.118945	0.0271702	0.025041	NA	0.0342405	0.0188455	0.0434345	-0.00172643
ATL1	-0.0543246	0.202945	-0.11786	-0.00850981	0.000132883	-0.0144446	0.178396	0.0974548	0.17832	0.0397473
ATL2	-0.00535024	-0.314106	-0.0247761	0.0172073	0.0173401	-0.00802566	0.0695541	-0.0120651	0.079848	0.0698917
ATL3	0.135051	0.0944381	0.059578	0.0131963	-0.0268301	-0.0317618	-0.027475	-0.0941327	-0.0155789	0.162919
ATM	0.360851	-0.120981	-0.0134975	-0.0425849	-0.0535921	-0.0811933	-0.177801	-0.0944781	0.00131821	0.00263449
ATMIN	-0.0680168	-0.199511	-0.0565438	-0.0351887	-0.00391636	-0.0271443	6.08e-05	-0.0455639	0.0545651	-0.00155176
ATN1	0.00775038	0.325646	-0.0076391	0.0284158	0.027956	0.044006	0.108363	0.0434078	0.00610147	0.060671
ATOH7	-0.00588247	-0.0150649	-0.176741	-0.105833	-0.144514	-0.093176	0.0911752	-0.164392	-0.0885425	-0.460858
ATOH8	0.00168649	0.267063	0.251418	0.0899839	0.0189804	0.0435126	-0.00407357	0.0791837	-0.0286167	0.137322
ATOX1	0.171161	0.163577	-0.0157155	-0.00480156	0.00277405	-0.0111861	0.170562	0.0206657	-0.0367928	0.0516072
ATP10A	-0.0062407	0.109814	-0.150408	-0.0022572	-0.0352792	0.00473615	-0.372789	-0.140759	-0.354139	-0.124127
ATP10B	-0.0423313	-0.322449	-0.30199	-0.0780322	-0.119015	-0.00470932	-0.306564	-0.12827	-0.139704	-0.181904
ATP10D	0.135889	-0.0969232	0.119037	0.022475	-0.0201818	-0.0385428	-0.152849	-0.0577075	-0.0772944	0.156316
ATP11A	0.014821	0.1021	-0.00388919	0.00283261	-0.00527351	0.0145389	-0.00930001	0.0345401	-0.040132	0.0554818
ATP11B	0.068789	-0.208052	0.0476575	0.00382765	0.00309351	0.0422702	0.0477214	0.0688974	0.194737	0.107984
ATP11C	0.0606156	-0.0689653	0.0339158	-0.0088305	-0.0292227	-0.0927706	-0.138515	-0.199633	-0.252117	0.0689458
ATP13A1	0.0775027	0.0573236	0.011332	0.0229947	0.0386869	-0.0442015	-0.0591543	0.0854996	-0.101523	-0.067305
ATP13A2	0.168611	0.60515	-0.087328	0.00321014	0.031983	-0.0471976	0.0962619	0.109221	-0.0230255	-0.0390188
ATP13A3	0.045715	0.113698	0.0101112	-0.00971455	-0.00488355	-0.0156913	0.0539501	0.032378	0.147248	0.100934
ATP13A4	-0.0478727	-0.0569759	0.0499316	0.0868289	0.0253164	-0.0433132	-0.186737	-0.175184	-0.160338	-0.00822001
ATP13A5	0.0122649	-0.111494	-0.0195482	0.0415673	-0.0583636	0.0523846	-0.362821	-0.172148	-0.158226	0.000515025
ATP1A1	-0.203499	0.286177	-0.207377	0.0422969	0.0481141	-0.0160278	0.191688	0.136394	0.15113	0.0566555
ATP1A2	-0.0429093	-0.638686	0.183065	0.100737	0.0307232	0.0360984	-0.0260897	-0.165819	-0.169407	0.0287322
ATP1A3	-0.0849285	0.408658	-0.0772151	0.0137471	0.0533657	0.02929	0.178191	0.137893	0.131328	-0.010781
ATP1A4	0.0275131	-0.0309028	0.160572	0.0751929	0.0618779	0.0107939	-0.183953	-0.110318	0.00266929	-0.00203628
ATP1B1	-0.134759	-0.0339842	-0.154275	-0.0438875	-0.0191778	0.00505576	0.086226	0.0426744	0.156884	-0.0145668
ATP1B2	0.101047	-0.0896031	0.14089	0.120223	0.00944791	0.072742	0.12118	-0.083959	-0.0402545	0.0701838
ATP1B3	-0.251742	-0.484511	-0.0501361	-0.0261179	-0.0221776	-0.0451304	0.0942302	0.0710443	0.106566	0.210646
ATP2A1	0.0165578	-0.0509407	0.251634	0.069378	0.171602	0.00480185	-0.186908	-0.0177094	-0.170363	0.0625075
ATP2A2	-0.0753848	-0.15963	-0.0754265	0.00261395	-0.00278346	-0.029294	0.0942961	0.0420228	0.103037	0.0242114
ATP2A3	0.174377	0.0446939	0.0428122	-0.0947706	-0.0901723	0.0477639	-0.241956	-0.166482	-0.12876	0.00827753
ATP2B1	-0.316703	-0.288126	-0.157424	-0.0270743	-0.00679554	0.0277272	0.146358	0.0760592	0.206326	0.0313905
ATP2B2	0.0249545	0.0421096	-0.267956	-0.058831	-0.00307381	-0.0267187	0.0859972	0.0391286	0.0482102	-0.0293261
ATP2B3	-0.0274385	0.335726	-0.081571	0.00400922	0.0564699	0.0674715	0.173978	0.192485	0.111434	0.0594062
ATP2B4	0.246482	0.157249	0.153135	0.0575927	0.0434887	0.0366368	0.156677	0.110691	0.207471	0.0695536
ATP2C1	0.236486	-0.259326	0.0173159	-0.00289957	-0.0137004	0.0899432	0.00763539	-0.00852973	0.0977701	0.00256202
ATP2C2	-0.218469	-0.0056516	0.18956	-0.0538809	-0.0627363	-0.146735	-0.200311	0.109354	0.00475403	0.0423169
ATP4A	0.00881678	-0.071468	-0.31451	-0.0719131	0.0387392	0.0525849	0.0210384	0.11502	0.00449187	0.113847
ATP5S	-0.181161	-0.33269	-0.103627	-0.0317009	0.0427739	0.0329997	0.056931	-0.00599385	0.0757912	0.0814428
ATP6AP1	-0.0110991	0.174413	-0.0641395	0.0278844	0.0312868	-0.0210699	0.197692	0.112228	0.10334	-0.0188314
ATP6AP1L	-0.129963	-0.0685707	-0.160724	0.0459423	0.0147798	-0.0537072	-0.100287	-0.0657473	0.00846063	0.0847565
ATP6AP2	0.0742229	0.0011833	-0.0635828	-0.00457731	0.00627138	0.00891527	0.15579	0.00960091	0.174707	0.0195481
ATP6V0A1	NA	NA	-0.051893	-0.00540878	0.0197266	-0.00345385	0.097553	0.0705358	0.10692	-0.0230647
ATP6V0A2	-0.0461048	-0.00772648	-0.105489	-0.0122713	-0.0364068	-0.0230187	-0.10686	-0.0359611	-0.0426347	-0.0527963
ATP6V0B	0.0932144	0.180273	-0.0337499	-0.0271814	-0.00904259	-0.0241368	0.0958246	0.0843668	0.019844	-0.0968064
ATP6V0C	NA	0.143885	-0.0259867	-0.00154965	0.0156246	NA	0.136646	0.0785992	0.0764786	-0.0571494
ATP6V0D1	-0.173127	0.44523	-0.0353105	-0.00686146	0.0180177	-0.0345745	0.0842225	0.0881855	0.0660942	-0.04249
ATP6V0E1	0.0412814	-0.0927005	0.230109	0.0281503	0.00570596	-0.0359769	0.104118	-0.0782871	-0.0076229	0.11468
ATP6V0E2	0.107892	-0.066615	-0.0634056	-0.0247636	-0.0141726	-0.0645253	0.0290101	0.0128492	-0.0705705	-0.102964
ATP6V1A	-0.0286055	-0.344642	-0.111938	-0.0237087	-0.00487364	-0.0103954	0.089688	0.053474	0.193023	-0.00823018
ATP6V1B1	0.0604502	0.0128922	-0.00647863	0.0420633	0.0657619	-0.0306024	0.418499	0.408246	0.105412	0.823462
ATP6V1B2	0.205392	0.0970921	-0.0738273	0.0118676	0.0284334	-0.0303786	0.137666	0.0863205	0.165616	-0.0242545
ATP6V1C1	0.0497587	0.189799	-0.0994285	-0.0052637	-0.00167761	0.0112219	0.0816628	0.0368451	0.208562	0.0192129
ATP6V1C2	0.00900605	0.0289053	0.0892406	0.130392	0.0893646	0.0542522	0.189475	0.18625	0.0685292	-0.0415545
ATP6V1D	-0.0643954	-0.0498785	-0.0251182	0.0108688	0.00573849	-0.00261676	0.0958925	0.0289909	0.155986	-0.0112858
ATP6V1E1	-0.0479501	0.131695	-0.115028	-0.000983034	0.0386987	-0.0198197	0.185497	0.0916432	0.156947	-0.00641803
ATP6V1E2	0.13976	-0.0896155	0.00663661	-0.0536374	-0.0238713	0.0862709	-0.0259462	-0.066754	-0.0120164	-0.0863793
ATP6V1G1	0.239982	-0.168834	0.0567049	0.0326129	0.028324	0.0283642	0.0780178	-0.0447154	0.030237	-0.0307508
ATP6V1G2	0.0103317	0.0530787	-0.0673098	-0.00647016	0.0724178	-0.00964252	0.136597	0.0595655	0.149691	-0.0353729
ATP6V1H	0.0124881	0.168437	-0.0109817	0.0516851	0.0545201	-0.0227203	0.229273	0.101485	0.117791	0.0705984
ATP7A	NA	-0.077374	0.0375295	-0.0142707	-0.0336842	-0.0640149	-0.1187	-0.0840609	-0.0117487	0.0567199
ATP7B	-0.158059	0.0958495	0.130927	0.0424325	0.027848	-0.0230316	-0.0849105	0.0502634	-0.0907055	0.0938345
ATP8A1	-0.155458	0.00415038	-0.0512516	-0.0329178	-0.0224519	0.0458579	0.0388867	0.0453874	0.144682	0.0181002
ATP8A2	0.000321497	0.0326015	-0.0458341	-0.0222597	0.0135292	0.00271012	0.0734482	0.11995	0.198302	0.0214488
ATP8B1	-0.23974	-0.0255304	0.0147919	-0.00956281	0.0568763	0.0433245	-0.0344561	0.00978665	0.0429949	0.27013
ATP8B2	0.231702	0.0699352	-0.0213465	-0.0093805	0.00936791	-0.0567596	-0.0807508	0.0616607	-0.0738128	0.00728931
ATP8B4	0.129264	0.0776142	0.11956	-0.0281416	-0.0295392	-0.0154722	-0.279933	-0.0860809	-0.00924456	-0.0680502
ATP9A	-0.377272	-0.0635312	-0.0491392	-0.00101253	0.0114481	0.00542607	0.123841	0.0886865	0.125222	0.00951268
ATP9B	-0.0279158	-0.104644	0.0252291	0.0351517	0.0369396	0.027011	-0.0103047	-0.0338008	-0.030216	0.093786
ATPAF1	-0.41662	-0.00668777	-0.0258516	0.000774168	-0.00751115	-0.0242071	0.0176578	0.024311	0.0809705	0.0443741
ATPAF2	-0.0995732	-0.108042	0.0274887	0.00888772	-0.00524644	-0.0375966	-0.00524861	0.0406169	-0.0412365	0.023164
ATR	0.0290322	0.163471	-0.104215	-0.0364782	0.00480486	-0.0391244	-0.0705572	-0.00894061	0.0858879	0.0596113
ATRAID	0.0104808	-0.0272112	-0.00288031	-0.00264616	0.0203833	0.000268937	0.0430687	0.0053768	-0.0066345	0.0265654
ATRN	-0.132748	0.0883835	-0.100344	-0.00855388	0.00631729	-0.0176772	0.117452	0.0563637	0.118741	0.00720127
ATRNL1	-0.0113174	-0.0711119	-0.220446	-0.0446474	0.0107686	-0.00726152	0.0480511	0.0237901	0.12984	0.0611726
ATRX	0.0542097	0.000124074	-0.0106738	0.00904274	0.00790539	0.0153962	-0.0102112	-0.0480163	0.176283	0.0542507
ATXN1	NA	-0.193331	-0.0120275	-0.0214895	-0.00317832	-0.0164433	0.0831272	0.0385763	0.0459746	0.0128271
ATXN10	-0.0561026	-0.13104	-0.0118922	-0.0105659	-0.0031333	-0.0279635	0.026426	-0.0360973	0.0691199	0.00603826
ATXN1L	-0.0221925	0.0514	0.0468115	0.0127103	0.0175071	-0.0246849	0.0225624	-0.000596039	0.0230445	0.028838
ATXN2	-0.087048	0.0983693	0.00091763	0.000281538	-0.0086978	NA	-0.00244495	-0.00323805	0.0074701	0.00337672
ATXN2L	0.0687657	0.343137	0.0336084	0.0254528	0.0281406	-0.0807409	0.019903	0.0558453	-0.0178633	-0.00451352
ATXN3	-0.0335161	0.0290639	-0.0697224	-0.0437462	-0.032326	-0.0545686	-0.064714	-0.0386329	0.00129138	-0.0263775
ATXN7	0.0165062	-0.0554893	0.000358546	0.00182931	-0.0174613	-0.0294787	-0.0750728	0.00109476	-0.00444474	-0.0221908
ATXN7L1	-0.0190276	-0.0190014	-0.0405172	-0.0233428	-0.0221432	0.0405246	-0.0300871	0.0397047	0.003806	-0.0447298
ATXN7L2	0.0610087	0.196163	0.0746018	-0.0353197	-0.0397901	-0.00339615	-0.0607535	0.12239	-0.107741	-0.0611054
ATXN7L3	-0.0313176	0.353443	-0.0586065	-0.0238105	0.00139693	-0.0395888	0.10363	0.0505634	0.0150372	-0.0332217
ATXN7L3B	-0.138275	0.292978	-0.0638236	0.0120438	0.0461357	0.010708	0.114626	0.0183365	0.114738	-0.0133922
AUH	-0.527372	-0.0794638	-0.0857387	-0.00494846	0.0105513	-0.013176	0.0483585	-0.0150168	0.0431842	-0.00571131
AUNIP	0.115644	-0.117618	-0.0778579	-0.0737673	-0.0266011	-0.0166183	-0.0850181	-0.0158985	0.173755	0.0204056
AUP1	-0.102007	0.0338431	0.017697	0.00447106	0.00706616	-0.0387633	-0.0357943	0.0499421	-0.0393986	-0.0969499
AURKA	0.0102993	0.0451353	-0.0255804	-0.0397836	-0.00991911	-0.00191306	-0.0805613	0.00548691	-0.126017	-0.0385305
AURKAIP1	-0.0968475	0.0572073	0.0298753	0.0152508	0.0163358	-0.00425163	0.166444	0.0461347	-0.0540288	-0.0743492
AURKC	0.0321667	-0.00683265	0.145255	0.08313	0.0697591	-0.0111374	-0.0511865	0.19965	-0.0233258	0.0721753
AUTS2	-0.333959	-0.346335	0.0524726	0.0104267	0.000199383	-0.0520876	-0.0111437	-0.0162073	-0.084617	0.00108691
AVEN	0.0410927	-0.103141	-0.0028662	-0.0424967	-0.049494	-0.0265672	-0.0144235	-0.153907	0.00292888	0.0192217
AVIL	-0.367239	-0.0735038	0.0775273	-0.0681196	-0.0546539	-0.0756304	-0.190803	-0.0537323	-0.142439	-0.103286
AVL9	0.0652546	0.252608	-0.0102221	0.00479	0.0247582	-0.0211761	0.0779183	0.0819456	0.141623	0.0372541
AVPI1	-0.31738	0.20928	-0.11044	0.0757131	0.10975	0.029451	0.261881	0.101198	0.0620768	0.146226
AVPR2	0.00104282	-0.0277306	0.0979302	-0.0301851	-0.168907	0.0233141	-0.334579	-0.031589	-0.26334	-0.10211
AXIN1	-0.19098	0.538831	0.0564282	-0.00262173	0.0138149	0.00365702	-0.0631702	0.0590324	-0.124344	-0.0744653
AXIN2	-0.0743934	0.109075	0.00554086	0.027693	0.0126289	0.0269444	-0.0412324	-0.000339822	-0.0619943	-0.0023405
AXL	0.297569	-0.347239	0.271451	0.103093	0.00322656	-0.0577662	-0.0463965	-0.145929	-0.186045	0.101636
AZGP1	0.0141047	0.265316	-0.366751	0.0759843	-0.282269	0.135989	0.0914661	0.163692	0.110098	-0.0250146
AZI2	0.0438649	-0.29579	-0.0116635	0.0112557	0.0186155	0.00344494	0.0251253	-0.0188108	0.0142817	-0.0210101
AZIN1	0.0560866	-0.0446461	-0.019623	-0.0229327	-0.0021049	-0.0515221	0.0723069	0.00725994	0.141585	0.0184551
AZU1	-0.0213829	0.0166702	-0.203091	-0.0582045	0.0385248	-0.0111164	0.086554	0.14638	-0.178734	-0.172047
B2M	0.0900401	-0.0967288	0.221587	-0.0124729	-0.0213243	-0.0281136	-0.0836841	-0.33343	-0.170608	-0.100073
B3GALNT1	0.306495	-0.205521	0.0446906	0.0146987	0.0213244	0.0391105	0.0688604	0.0498301	0.173031	-0.000236612
B3GALNT2	0.0945097	-0.0763022	0.0423156	-0.0188825	-0.016095	0.0261188	-0.0292022	-0.00836788	-0.0319908	0.0572923
B3GALT1	-0.0708267	0.107002	-0.0449912	0.0455167	0.0308236	0.0251377	0.0738906	-0.0447057	0.121552	0.0219484
B3GALT2	0.0318688	-0.0574988	-0.129622	-0.0942566	-0.0817306	0.00833453	0.0633459	0.0579484	0.33457	-0.0422279
B3GALT4	NA	0.0383467	-0.0865127	-0.0785673	-0.0352511	-0.00944448	-0.065131	0.0273745	-0.134915	-0.0819774
B3GALT5	0.332749	-0.0810861	-0.00114539	0.0272551	-0.0398483	0.0495069	-0.0722628	-0.0317126	-0.322694	-0.00588661
B3GALT6	-0.0280013	0.283273	0.022545	-0.05395	-0.0183236	-0.0100905	0.0636538	-0.0202289	-0.0749321	-0.0760093
B3GAT1	-0.0436605	0.0374489	0.0156273	-0.0155064	-0.00556288	0.000764419	0.0298583	0.0413052	-0.0549968	-0.0439787
B3GAT2	-0.0236492	0.00655837	0.14676	0.0384366	0.0268206	0.0414388	0.0634502	0.00679609	-0.0104104	0.0614753
B3GAT3	NA	0.374263	-0.00800426	0.0100806	0.0223356	-0.0387971	0.0736492	0.0890588	-0.0675183	-0.0750597
B3GNT2	0.0372837	-0.187433	0.0876048	0.00845398	-0.0124763	-0.0260102	0.124082	0.0290954	0.046038	0.0390792
B3GNT4	0.00111312	0.181387	0.0529258	-0.00220644	0.00418482	-0.0273662	0.173748	0.183935	0.0765049	-0.00113207
B3GNT5	0.0385209	-0.103858	-0.0543641	-0.116176	-0.144054	-0.137372	-0.042923	0.0971222	0.00535443	0.0577862
B3GNT7	-0.0549624	0.0383101	0.147315	-0.0504414	-0.0257395	-0.0185324	-0.0636949	0.0214507	-0.135525	0.113391
B3GNT8	-0.546111	-0.0546192	0.0937138	-0.120433	-0.252995	0.00906521	-0.066002	0.0362812	-0.149133	-0.0792062
B3GNT9	0.0388679	0.00571801	0.0359156	0.0696794	0.0311527	0.0620369	0.0491838	-0.0649734	-0.0664743	0.0551832
B3GNTL1	0.0969146	0.0759181	-0.0240522	-0.00194542	0.0331011	0.0758826	-0.147411	-0.00551905	-0.142015	-0.0856694
B4GALNT1	0.00396738	0.0144534	-0.0765371	-0.0362076	-0.0340978	0.019074	0.0297954	0.123271	-0.0285025	-0.0536601
B4GALNT3	-0.0661857	-0.0276155	0.0178806	-0.0284685	0.00726994	0.00559331	-0.176072	0.0942474	-0.199516	-0.100338
B4GALNT4	-0.00257567	0.316584	0.00329626	0.0111765	0.059916	-0.0297495	-0.0984081	0.0580566	-0.17646	-0.0641553
B4GALT1	NA	NA	0.240145	0.0477745	0.0364722	-0.0665775	0.103557	-0.0988024	-0.0857301	0.246483
B4GALT2	-0.00230686	0.0748333	0.000503213	-0.0684353	-0.042617	-0.0308431	0.000294631	-0.0381672	-0.146611	-0.108101
B4GALT3	0.062978	-0.0546731	0.00277157	0.00151034	-0.015997	-0.0475568	0.0266795	0.057036	0.0198371	-0.0352459
B4GALT4	-0.0356628	0.0108115	0.0701689	0.0418123	0.0422858	0.0515615	0.030845	0.0319483	0.0122123	0.10529
B4GALT5	-0.139076	0.0967262	0.0190674	0.0140543	0.0132987	0.0205267	0.0947624	0.0626075	0.131577	0.0426072
B4GALT6	0.031565	-0.188626	-0.100319	0.0257093	0.0391258	-0.0230184	0.158603	0.0785993	0.198004	0.0575979
B4GALT7	0.0892807	0.302456	0.0286043	-0.0140314	0.0183442	-0.0450526	0.0112155	-0.0196483	-0.045087	-0.0375919
B9D1	0.162578	-0.157186	-0.0811452	-0.038343	0.0105649	-0.0661621	-0.0130147	0.0810726	-0.0828129	0.00194641
BAALC	-0.0502961	-0.124972	0.083065	0.00211401	0.0189505	-0.0373657	0.0322739	-0.0945235	-0.084486	-0.0392159
BAAT	-0.0142752	0.0592382	-0.213324	-0.0327419	0.0292355	-0.0147056	0.00968974	0.121781	0.0543307	-0.123021
BABAM1	-0.0759465	0.460209	-0.0590217	-0.0174897	0.0313452	-0.0366502	0.0728962	0.0925792	0.0209845	-0.0663865
BACE1	0.20934	-0.149202	-0.0798701	-0.0297876	-0.00244924	0.00651723	0.0653526	0.0934528	0.103983	0.000282432
BACE2	0.712875	-0.129292	0.406855	0.0683613	0.0178152	0.100891	0.146102	0.0319389	0.107423	0.205878
BACH1	0.0641336	-0.10043	0.0777262	0.00879834	0.0079392	-0.0347079	-0.109637	-0.113707	-0.00906159	-0.00439634
BACH2	0.160281	-0.0409004	-0.0764638	-0.0418595	-0.0235295	-0.0414635	-0.0624045	0.00960688	-0.0442428	-0.0775476
BAD	-0.212306	0.267735	0.0284713	-0.0448689	-0.0057862	-0.0913413	0.0369638	-0.0430364	-0.12869	-0.116889
BAG1	-0.163019	-0.0129786	-0.0555052	-0.032251	-0.0258545	-0.0411684	0.0281245	-0.0805918	-0.0991716	-0.06804
BAG2	NA	NA	0.127742	0.0156799	-0.0359651	-0.0856559	-0.0358631	-0.0321985	-0.0106845	-0.0588233
BAG3	0.483443	0.365954	0.81222	0.447397	0.232524	-0.0648788	0.594365	0.52838	0.471461	0.569844
BAG4	-0.0201414	-0.0871454	-0.000150395	0.0421387	0.0634221	0.0613196	0.19023	0.122639	0.244697	0.095274
BAG5	0.00454601	-0.171446	-0.0476109	0.00234636	-0.00968527	-0.0479672	0.0598196	0.00528621	0.100236	0.021617
BAG6	NA	0.34253	-0.03337	0.0260706	0.0459821	-0.011416	0.0898976	0.0389372	-0.0136004	0.0384396
BAHD1	-0.0231677	0.0416492	0.00265031	0.00824234	0.00416584	-0.0125379	0.102619	0.0132079	-0.0194139	-0.0123205
BAIAP2	0.0206653	0.357029	0.0112168	0.00486183	0.0346245	-0.0417506	0.128849	0.251826	0.0796191	-0.0136533
BAIAP2L1	0.383426	-0.0840288	0.0627313	0.00589109	0.0109056	0.0616799	-0.206846	-0.117806	-0.258112	0.0500672
BAIAP2L2	-0.405654	-0.0265997	-0.0330763	0.0338723	0.0104936	-0.04953	-0.0935566	0.0927616	-0.120453	-0.124095
BAIAP3	NA	0.348171	0.109334	0.117765	0.174781	-0.0203878	0.105579	0.183102	-0.0113845	0.0360284
BAK1	NA	NA	-0.0413193	-0.0346913	0.0149614	-0.00231676	-0.0222065	-0.0172463	-0.128599	-0.094813
BAMBI	0.0931951	NA	0.0566124	-0.040875	-0.086992	-0.0618835	-0.00212929	-0.128982	0.0434942	0.031507
BANF1	-0.0405486	0.517554	0.0929219	0.00591548	-0.0116862	-0.0158504	0.127026	-0.0363323	0.00387086	0.0268771
BANP	-0.00465762	0.0480189	0.101361	0.0306679	-0.0198052	-0.0969792	-0.0998649	-0.0254478	-0.125929	-0.0511881
BAP1	-0.119751	0.421682	0.000187827	0.00125386	0.0269075	-0.00111724	0.0841757	0.0607694	-0.00517208	0.0238715
BARD1	0.0482094	-0.0801429	0.0356163	0.0298311	0.000717017	-0.0245042	-0.0169578	-0.198931	-0.0472384	0.00369471
BASP1	0.648441	0.197027	-0.0131583	-0.0140886	-0.0234749	-0.00137772	0.228004	0.121018	0.136897	-0.0329275
BATF2	0.33001	0.0910546	0.355097	0.0869794	0.0252007	0.0507943	-0.249694	-0.212264	-0.329467	-0.321107
BATF3	0.473574	-0.0165546	-0.0100747	-0.0563053	0.0557255	-0.10039	-0.0876371	-0.0146195	-0.107296	-0.0577375
BAX	0.0743584	-0.18958	0.0702774	-0.00419659	0.0139113	-0.0671501	-0.0864599	-0.0800065	-0.117179	-0.181587
BAZ1A	0.106971	-0.119195	0.233018	0.0295265	0.000183786	0.00412282	-0.131774	-0.131012	-0.013903	0.188016
BAZ1B	-0.0397367	0.168275	0.0520517	-0.00489626	-0.0163377	-0.0384058	-0.0194054	-0.0790783	0.0402344	0.0174177
BAZ2A	-0.0750564	-0.0898038	0.0271079	0.0104551	0.00238655	-0.066163	-0.102426	-0.042811	-0.0716101	-0.0251303
BAZ2B	0.0721529	-0.144434	-0.0363015	0.0107594	-0.0027978	-0.0353997	-0.186308	-0.132348	-0.0283504	0.0377132
BBC3	NA	NA	0.0715898	0.0911108	0.146517	-0.0188544	0.247444	0.231028	0.00402706	0.0865784
BBIP1	NA	NA	-0.0435541	-0.0418227	-0.0342728	-0.0452584	-0.0979934	-0.000812763	0.0497531	0.0304112
BBOX1	0.0184057	-0.428572	0.248543	0.145991	0.0778544	-0.105679	0.087422	-0.138213	-0.0620947	0.0366912
BBS10	0.0396577	-0.222914	0.018765	0.000632548	-0.0173111	-0.0067593	-0.0133577	-0.119197	0.124251	-0.0303846
BBS12	-0.0854327	0.193508	-0.0350272	0.0227369	-0.00406641	0.00874778	0.138139	-0.0464957	0.160723	-0.0615568
BBS2	-0.129919	-0.159821	-0.0395336	0.0392906	0.0322419	0.0194468	0.00274623	-0.0508242	-0.0609689	0.0391653
BBS4	-0.0315624	0.0215164	0.0243355	0.0361775	0.0271564	0.0441238	-0.0116175	-0.0228731	0.0127446	-0.00085818
BBS5	0.00934324	-0.00649815	-0.0220497	-0.00737321	-0.0206302	0.0374395	0.0146706	0.0244333	-0.0936885	-0.048708
BBS7	-0.0346752	-0.0339068	-0.123106	-0.0459052	-0.00498271	0.0397016	0.0642447	0.0427212	0.213535	0.0417789
BBS9	-0.0122033	0.0357183	0.0249842	-0.0126371	-0.00277272	-0.011241	-0.019893	-0.0609825	0.00623671	0.0720842
BBX	0.166706	-0.173269	0.0591266	0.0241264	0.00338914	-0.0505226	-0.00115789	-0.040342	0.0310198	0.0788737
BCAM	0.0489993	-0.00455533	0.13327	0.0431741	-0.0182116	0.050031	-0.0420179	-0.0370927	-0.131008	0.0586697
BCAN	-0.0571539	0.265766	0.186818	0.0287284	0.0167652	0.0318809	-0.0285184	-0.0886845	-0.170065	0.00795408
BCAP29	NA	-0.078602	-0.0566703	-0.0234873	-0.00135728	0.0120201	0.0370678	0.0219499	0.150198	0.0408623
BCAP31	NA	0.408316	-0.00355101	0.0236981	0.018446	-0.00147116	0.0942627	0.0278128	0.0221656	-0.00591091
BCAR1	-0.154858	0.385562	0.0234076	0.0229452	0.0423464	-0.0335875	0.0412147	0.0834279	-0.117762	0.00978693
BCAR3	-0.213906	-0.112979	0.208347	0.0929093	0.0156667	0.00417166	-0.0437349	-0.076171	-0.102175	0.00358727
BCAS1	-0.194397	0.222692	0.0043423	-0.108219	-0.0721967	0.11135	-0.365617	-0.327068	-0.233911	0.0899025
BCAS2	0.0201495	-0.174056	-0.0566007	-0.00324482	0.028907	0.00950156	0.107754	-0.0393599	0.11469	0.0222849
BCAS3	0.0191823	-0.0248774	-0.0821433	0.0120294	0.0100576	-0.0109745	0.00905483	0.0180844	0.0627922	-0.000947401
BCAS4	0.346562	0.0175538	-0.0462974	0.0458878	0.047821	-0.0159443	0.13125	0.0711682	0.0827885	0.0526965
BCAT1	0.265978	-0.14851	-0.0347175	-0.0176934	0.0207791	-0.0160217	0.0206729	0.0293076	0.139404	0.0115436
BCAT2	-0.538451	0.181184	-0.0110525	0.081836	0.0201873	0.0057336	-0.130301	-0.00872345	-0.118758	0.0497529
BCCIP	0.0806126	-0.0935104	0.217826	0.0492593	-0.0162732	0.0185254	0.0166714	-0.0347313	0.0419133	0.00526309
BCDIN3D	0.00668113	-0.11614	-0.110075	-0.025105	-0.0267783	-0.0314044	-0.00604693	-0.0415115	-0.0179176	-0.0425909
BCHE	-0.145983	-0.213081	0.0645918	-0.0909961	-0.0997807	0.000797819	-0.17556	-0.134124	0.0141499	-0.165506
BCKDHB	-0.244257	-0.0999304	0.0182833	0.0534244	0.0432451	0.0206794	0.0884936	-0.070043	0.00607129	0.0218009
BCKDK	0.0432772	0.0472238	0.019192	0.00061236	0.0169497	-0.0395717	-0.0168787	-0.00603069	-0.0472097	-0.0861959
BCL10	0.101626	-0.0865428	0.0673502	0.00357182	0.00885615	-0.0262135	0.0501077	-0.071144	0.102457	0.0105419
BCL11A	-0.217295	-0.0357451	-0.171266	-0.0554858	-0.0408045	-0.046696	0.0285138	0.0193472	0.0663843	-0.130085
BCL11B	0.0995848	0.0937171	-0.0563255	-0.0350252	-0.0384543	-0.0263726	0.0278233	0.0491912	-0.0704966	-0.101172
BCL2	-0.0719833	-0.380009	0.104563	0.0662111	0.0198212	-0.0537177	-0.0224156	-0.120448	-0.0348814	-0.0537993
BCL2L1	0.182583	0.577125	-0.0609039	0.00941061	0.0152082	-0.0486496	0.11094	0.0248956	0.0387193	0.0126507
BCL2L10	-0.277819	-0.0284823	0.161629	0.0788001	-0.0393587	0.0262029	0.355197	NA	-0.024315	-0.111418
BCL2L11	0.0741535	-5.02e-05	0.121016	0.0569156	0.0362892	0.0590992	-0.0475611	0.0543581	0.0261052	0.127823
BCL2L12	0.106885	-0.116292	-0.0328874	-0.00319066	-0.0277482	0.0111268	-0.121879	0.0346364	-0.121374	-0.0717794
BCL2L13	-0.117447	0.228739	0.059998	0.0265619	0.0345602	-0.0262818	0.11289	0.110324	0.12025	0.113844
BCL2L14	-0.0845867	0.0627679	-0.257431	0.0559493	-0.07263	0.0510914	-0.338787	-0.0925008	-0.266387	-0.0537847
BCL2L15	-0.143931	0.0100228	-0.111009	-0.0496511	0.0644365	0.0504182	-0.0567128	0.0109286	-0.124699	-0.0321671
BCL2L2	-0.179342	-0.0069718	-0.0532769	-0.0204408	-0.0162804	-0.0171048	0.0234541	-0.00889423	0.046843	-0.0104861
BCL3	0.217503	0.0965322	0.299733	0.190021	0.0843286	-0.0504245	0.287722	0.244502	0.184596	0.415789
BCL6	0.613605	0.0920521	0.21505	0.191477	0.100305	-0.0431908	0.22352	0.24604	0.223084	0.267787
BCL6B	0.0956983	0.0106396	0.0442454	-0.0654775	-0.0802165	0.00256773	-0.162915	0.0569219	-0.0161095	0.0399069
BCL7A	-0.000916642	0.12598	-0.0433016	0.0129878	0.0504589	0.0315699	0.180557	0.121536	0.10394	0.0239676
BCL7B	-0.0804687	0.360111	-0.0735837	0.00176552	-0.0246495	-0.0543839	0.10906	0.0787663	0.016773	0.000555056
BCL7C	-0.13898	0.222453	0.063396	-0.0509194	-0.00580663	-0.0107506	-0.0639645	-0.0450828	-0.0837493	-0.0940833
BCL9	0.021197	-0.052437	0.0797493	0.0195457	0.00336539	-0.0220049	0.0656853	0.0268235	0.0874378	0.0214651
BCL9L	0.076234	0.176643	0.0481723	-0.0295419	-0.00582036	-0.0584753	0.0366642	0.0187447	-0.0340443	0.0346509
BCLAF1	-0.0370048	-0.0512527	-0.00334049	0.00203664	0.0127456	0.0208756	0.031718	-0.00875542	0.15835	0.0362833
BCO2	NA	NA	0.019587	-0.0395538	-0.0295506	-0.00920073	-0.110405	-0.0154118	0.0575097	0.0245688
BCOR	0.0426883	-0.063713	0.0838692	-0.0316626	0.000925	0.057755	0.0138635	0.0515956	0.0400321	0.0374651
BCORL1	-0.0254693	0.143747	0.0850822	0.0197437	0.0241721	-0.0407853	0.102422	0.0506831	0.0169992	0.057982
BCR	0.0661844	-0.0874377	0.0136491	0.029939	0.0410651	-0.053145	0.0307916	0.0862761	-0.056614	0.0215166
BCS1L	-0.186482	0.175517	0.0189668	-0.00484731	-0.00783232	-0.0323816	-0.122158	-0.0587023	-0.131469	-0.121911
BDH1	-0.555822	-0.129933	-0.0841539	-0.0145786	-0.000455632	-0.0506999	0.00084803	0.0255402	-0.0427861	-0.0280252
BDNF	-0.0332919	-0.103145	0.081689	-0.146654	-0.113251	-0.17301	0.249456	0.382004	0.451352	-0.0625937
BDP1	-0.0484958	0.0653453	-0.0261662	-0.0282391	-0.0121151	-0.0270505	-0.0800525	-0.0434246	0.0793293	0.0088045
BEAN1	0.0799473	0.0509806	-0.0876142	-0.0465162	-0.0571988	-0.0469716	0.0427938	0.119437	-0.00921051	0.14393
BECN1	-0.161895	-0.0121712	-0.127588	-0.0300955	0.00661734	-0.00609984	0.00984666	-0.0119123	0.0236629	-0.0284646
BEGAIN	-0.302583	0.00450133	-0.0470538	0.000385403	-0.0311611	-0.106345	-0.0295947	0.0182988	-0.135126	-0.0782864
BEND3	-0.110236	0.00799762	0.0901524	-0.0302524	-0.0349236	0.0105378	0.0450976	-0.0225994	-0.00160062	0.00226404
BEND4	-0.0493395	0.0626995	0.175519	0.0430294	0.0326493	-0.0131419	-0.183906	-0.0645583	0.0701427	-0.195015
BEND5	0.0707099	-0.101386	-0.0218009	-0.0130965	-0.0252124	-0.04696	0.0459894	0.0962629	0.108192	-0.0300701
BEND6	0.0636264	-0.127326	-0.125919	-0.0436652	-0.0088338	0.0715722	0.0786392	-0.0333757	0.0689399	0.0228595
BEND7	-0.0831318	0.0428505	0.108907	-0.0130905	-0.0313094	-0.0104756	-0.107218	0.039209	0.0472019	0.0415435
BEST1	0.128443	0.438592	-0.200681	0.0272591	-0.0281503	0.00248641	-0.253553	-0.0406737	-0.192656	-0.0748819
BEST4	-0.654652	0.109487	-0.196516	-0.0425324	0.0163323	0.00164501	-0.189386	0.134969	-0.12251	-0.154915
BET1	0.180382	-0.328022	0.0315122	-0.000553511	-0.0283245	-0.0658471	0.0219021	-0.0276853	0.046748	0.0303667
BET1L	0.0491166	0.133615	0.00913482	0.0305412	0.0392301	-0.0491947	-0.0464445	0.0295649	-0.10321	-0.0441322
BEX1	-0.114165	0.059118	-0.0559709	0.0125354	0.0443791	-0.0115092	0.223448	0.0253606	0.0805946	-0.0689285
BEX2	-0.182179	0.213985	-0.049193	0.0239359	0.0704418	0.00977691	0.18042	0.061396	0.11708	-0.00652165
BEX4	-0.133188	-0.13994	-0.0476343	0.0184237	0.0451811	0.0130341	0.218842	0.0249198	0.145699	-0.031887
BEX5	0.27657	0.08721	-0.142821	0.0123151	0.025903	-0.0204319	0.147667	0.00196467	0.0960751	-0.0380112
BFAR	0.0737404	-0.0349419	0.0168618	0.00617025	0.0316463	-0.00585809	-0.00469477	-0.0309312	0.0246431	0.0101825
BFSP1	0.014804	-0.0241983	-0.0656382	-0.0393672	0.0494651	-0.0214055	0.129104	0.0357882	0.0883032	0.0473132
BGN	0.971758	-0.128932	0.0826711	0.0684248	-0.0181076	0.00727596	-0.136506	-0.108775	-0.123767	0.307353
BHLHB9	-0.0744395	-0.196252	-0.0162803	-0.00499334	0.0171129	-0.0443537	0.107608	0.118723	0.187205	0.0763647
BHLHE22	0.555006	0.10841	0.230739	0.0409624	-0.0172145	0.0412457	0.167586	0.14866	0.126778	0.00893744
BHLHE40	0.85455	-0.100372	-0.133134	0.0606273	0.071228	0.0111693	0.0684867	0.00238259	0.0239351	0.046538
BHLHE41	0.0683919	-0.0685842	0.0766389	0.0321331	0.0429486	0.0474918	-0.0517685	-0.15033	-0.0995658	-4.37e-05
BHMT	-0.0235994	0.0397122	0.0517841	-0.0370121	0.107971	0.073728	0.020481	0.0662114	0.182227	0.200371
BHMT2	0.00972629	-0.0458631	0.171878	0.0686357	0.102073	0.0121734	0.0326563	0.0969128	0.0793453	0.342712
BICC1	0.261763	-0.135589	-0.0149416	0.035344	0.0301338	0.0196524	-0.00203074	-0.00809228	0.0450362	0.196196
BICD1	0.23239	-0.193045	0.00962235	-0.0105809	-0.0144852	0.00797044	-0.0275099	0.00710397	0.0799752	-0.0272423
BICD2	0.10123	-0.0492796	0.0188586	0.00613931	0.022437	0.0108727	0.0261277	0.0752931	0.0316868	-0.00146597
BID	0.159851	-0.00691607	-0.0256897	-0.0030852	-0.0163747	-0.0291156	0.0652817	0.0300844	0.045612	0.0354392
BIN1	-0.0133669	0.681737	0.0137832	-0.00228827	0.000668115	-0.0497728	-0.0821411	0.0777834	-0.0931164	-0.0784144
BIN2	0.049574	0.018328	0.0731733	-0.215959	-0.192971	-0.0209706	-0.562962	-0.404394	-0.195891	-0.416255
BIN3	-0.0962774	0.182227	0.104497	0.00555566	0.0210588	-0.0130181	-0.0200328	0.186752	0.0542052	0.0859486
BIRC2	-0.0222805	-0.445853	0.0310091	-0.0266096	-0.010462	-0.0292635	0.0371507	-0.0422908	0.114029	0.0199038
BIRC3	0.470826	-0.227193	0.335693	0.170521	0.0382072	0.0668178	0.0028471	0.00901476	0.153456	-0.00447265
BIRC6	-0.0652236	-0.0454229	-0.0368487	-0.0241679	-0.014776	-0.0223559	-0.0937733	-0.0550022	0.00106895	0.0142868
BIVM	-0.18033	-0.051962	-0.0922936	-0.0286267	-0.00666476	-0.00215577	-0.0840607	-0.0134617	0.015853	-0.0392496
BLCAP	-0.113644	0.175932	0.0331796	0.0108867	0.0469494	-0.00990227	0.0658562	0.0919127	0.0385946	-0.0120907
BLID	-0.01499	-0.0296785	-0.168869	-0.0296933	-0.114102	NA	-0.391801	NA	-0.0370217	-0.020103
BLM	0.117804	-0.0920284	0.112153	-0.0328506	-0.0230611	-0.0297007	-0.227644	-0.138591	0.0576454	-0.0684866
BLMH	0.0896109	-0.116039	-0.0399331	0.00475661	0.021205	-0.0235575	0.0154806	-0.0537311	0.0152896	0.0122677
BLNK	NA	-0.0156667	-0.0917573	-0.307084	-0.321078	NA	-0.720975	-0.495595	-0.244984	-0.502928
BLOC1S1	-0.320936	0.247804	-0.0417579	-0.0475102	0.000138788	-0.0482751	0.00135101	-0.103951	-0.0193887	-0.048022
BLOC1S2	0.0558644	-0.0363627	-0.00167067	-0.00727573	0.0189046	-0.0227567	0.106436	0.0480327	0.217973	0.0234485
BLOC1S3	NA	-0.0040196	0.00402655	0.0125508	0.00664776	-0.0315031	0.0105394	0.0306697	-0.00753157	0.0094699
BLOC1S4	-0.0615848	-0.0504919	-0.00969127	-0.00386086	0.0053448	0.0138744	0.07674	-0.012236	-0.0677045	-0.075542
BLOC1S5	-0.109216	-0.150502	0.0270847	-0.0127399	-0.0179792	0.00419941	-0.0245037	-0.136633	0.0147237	0.018076
BLOC1S6	0.029811	-0.261064	0.0409432	0.0163498	0.0328637	0.0593491	0.0892426	0.0336251	0.181929	0.00947113
BLVRA	0.555223	-0.114088	-0.124685	0.04815	0.057531	0.0313548	0.0203386	-0.0132155	0.0488903	0.0429536
BLVRB	-0.533838	-0.0581024	0.177264	0.055843	0.0812443	-0.0282503	0.182693	0.0628651	0.0239352	0.0879426
BLZF1	-0.106165	-0.201836	-0.00127068	0.00316533	-0.00908605	0.0585096	-0.0256928	-0.0443796	0.0943445	0.0167262
BMI1	0.121228	-0.0272844	0.008865	-0.017823	0.00964009	0.0305467	0.0783995	0.0244542	0.091975	0.0024682
BMP1	-0.213006	0.107729	0.0827213	-0.0171671	0.0185347	0.0423109	-0.119451	0.0191447	-0.0959972	0.041017
BMP2	-0.0662752	-0.0440872	0.0732097	0.0356601	-0.0296633	-0.0635319	0.177566	-0.0119271	0.0988978	0.0106771
BMP2K	-0.0616683	-0.129786	0.193917	-0.001329	-0.0623391	-0.0631184	-0.148269	-0.270081	-0.100212	-0.135892
BMP4	-0.113877	0.076349	-0.0195471	-0.0134684	0.00813817	0.0491439	0.191502	-0.0582546	0.0625535	0.197494
BMP6	0.126162	-0.25296	-0.0980248	0.0592092	0.0178416	-0.028059	0.15612	-0.0159497	0.0704413	0.515681
BMP7	0.475495	-0.442674	0.165874	0.0631114	0.0184193	0.0443169	-0.115534	-0.196578	-0.253137	-0.0927605
BMP8A	-0.0222762	-0.0397409	-0.271348	-0.0775473	0.0325476	-0.0202838	-0.0610768	0.099408	-0.246205	0.0042918
BMP8B	-0.126752	0.00268052	0.0220967	0.00152375	-0.00565211	0.0154643	-0.0685496	0.031616	-0.0856265	0.0537663
BMPER	-0.00728041	-0.00613644	-0.131527	-0.0207895	-0.00286789	-0.0361937	0.0409629	0.110854	0.0825226	0.00472003
BMPR1A	NA	-0.215183	0.108341	0.0361101	0.0155336	-0.0985752	0.0809388	-0.0293405	0.0599212	0.146365
BMPR1B	0.0133953	-0.50797	0.312192	0.167022	0.10156	0.00499712	0.109166	-0.152519	0.0117608	0.100713
BMPR2	0.152547	-0.251236	-0.0300833	0.00993991	0.0122486	-0.000962203	0.0872622	0.040603	0.175036	0.0206311
BMS1	0.000899053	-0.0276267	-0.0313048	0.00688923	-0.0051135	-0.0259488	-0.00300885	-0.0309456	0.040961	-0.017031
BNIP1	-0.0110857	-0.0739161	0.0589561	-0.00453093	-0.0147939	-0.0539195	-0.114267	0.0111925	0.00139945	-0.0442655
BNIP2	NA	-0.095089	0.117546	0.0233374	-0.00896997	-0.000827539	-0.0937063	-0.127784	-0.0274434	0.133884
BNIP3	0.321337	-0.104774	-0.0192972	0.0314236	-0.00961133	-0.00434987	0.119031	0.0044512	0.0613715	0.0226655
BNIP3L	0.149089	-0.264503	-0.0830854	-0.00822007	0.00727036	-0.00829484	0.0582282	-0.00935706	0.129874	0.060084
BNIPL	-0.103662	-0.0229451	0.246701	0.00623934	0.0791003	0.0240628	-0.187609	0.0342275	-0.0515318	0.0355751
BOC	0.0520323	-0.0458387	0.125614	0.0898928	0.0333618	-0.0495094	0.0364318	0.0458878	-0.0427266	0.107893
BOD1	-0.0817481	-0.243846	0.0225828	0.0236676	0.0179104	-0.0132959	0.0386885	-0.00413977	0.0161915	0.029641
BOD1L1	0.00667558	0.011013	-0.0400018	-0.00762979	-0.0113533	-0.0366398	-0.0959577	-0.0663547	0.0624221	0.00409228
BOK	-0.0713373	0.519009	-0.11007	-0.0771317	-0.0495114	0.0200737	-0.203918	0.0193708	-0.145469	-0.0759178
BOLA1	NA	NA	-0.0461598	-0.0131498	0.0118013	-0.0360114	0.0369385	0.02556	-0.106401	-0.0219203
BOLA3	-0.107035	-0.294099	-0.0579631	-0.0045094	-0.000142925	-0.0381935	0.0699448	0.0855367	0.0159396	-0.0237509
BORA	-0.0613611	-0.0843505	0.0182706	0.00541291	-0.0883763	-0.0113965	-0.0899156	0.0231036	-0.0587173	0.102294
BPGM	0.00552801	-0.228003	-0.031317	-0.00130684	-0.00523605	-0.00993943	0.0410202	-0.0167404	0.073194	0.0223171
BPHL	-0.450544	-0.218333	0.0389398	0.0427866	0.0658302	0.0733849	-0.0279855	0.0678148	-0.00599188	0.0035949
BPNT1	-0.431234	-0.240629	-0.0508512	0.0168422	0.0109371	0.00367381	0.0287883	-0.00150458	0.0320792	-0.0105391
BPTF	0.0119297	-0.0389625	0.0235239	-0.00728038	-0.0302177	0.0355543	-0.0726327	-0.0864672	0.00141524	0.0203446
BRAF	-0.100226	-0.167382	-0.0863355	0.0149686	0.015665	-0.0358908	0.0763069	0.0286358	0.168531	0.0419381
BRAP	NA	NA	0.00180314	0.0161703	0.00286476	-0.0152452	-0.00402003	-0.0385905	0.0376324	0.012544
BRAT1	-0.033685	NA	0.0223653	0.000857903	0.0298834	-0.00773059	-0.0658676	0.0554963	-0.193085	-0.0592698
BRCA1	-0.00762723	-0.0869049	-0.023808	-0.0443772	-0.0744146	0.023853	-0.165889	-0.196731	-0.0582141	0.146104
BRCC3	-0.113688	-0.122168	0.00925099	0.00939606	0.00410861	0.0216967	0.0138251	-0.000587114	0.148141	0.00165422
BRD1	-0.0425429	0.17959	0.0412509	0.00883269	0.022724	-0.0544825	-0.0798998	0.0272121	-0.0727732	-0.0738986
BRD2	0.0595409	-0.00694563	-0.0246566	-0.0293249	0.0230685	-0.00937403	-0.0251993	-0.0288738	-0.0253039	-0.0281824
BRD3	-0.100432	0.256846	-0.0395064	-0.00150903	-0.0445777	-0.00141582	-0.0439641	-0.0686716	-0.0883081	-0.0447766
BRD4	-0.0278674	-0.0948162	0.0944267	0.0219649	0.0157625	-0.0580498	0.119497	0.0871543	0.0701258	0.054866
BRD7	NA	-0.525866	0.061236	-0.0288641	-0.0371977	-0.00404871	-0.0440911	-0.0703982	0.0116597	-0.0222996
BRD8	-0.0201877	0.0307508	-0.0474075	0.00790188	-0.00999636	-0.00564433	-0.0212737	-0.00224808	-0.0124617	-0.000173124
BRD9	0.101325	0.0177936	-0.0553287	0.00187457	0.0257549	-0.0228508	-0.0927153	-0.0135011	-0.069878	-0.0516126
BRF1	-0.0228884	0.347804	0.000160589	-0.00696332	0.0229445	-0.0385365	0.039242	0.200615	-0.00304007	-0.0319027
BRF2	-0.254212	0.303262	-0.0117119	0.0285759	0.0541991	0.00097569	0.103475	0.00440704	-0.0312536	0.0451333
BRI3	-0.0857378	0.0443011	0.0940586	-0.000281825	-0.00620432	-0.0203614	0.0612533	-0.0431431	-0.124151	-0.0769651
BRI3BP	-0.176836	-0.308204	-0.037379	-0.0224584	-0.0396184	-0.0204492	0.0413218	0.0220913	0.0989499	-0.0221951
BRICD5	-0.112376	0.324794	-0.0455558	-0.0556624	0.0387505	-0.0154447	-0.243983	0.108989	-0.17199	-0.137752
BRINP1	-0.0641312	-0.108688	-0.0863867	0.0012737	-0.000711874	-0.0272256	0.13893	0.0251704	0.0858537	-0.0298897
BRINP2	-0.010823	0.0472663	-0.0197308	-0.00916746	0.0203655	-0.0201702	0.0365531	0.00220321	-0.00694475	-0.0549538
BRINP3	-0.546545	-0.141013	0.0579405	0.0233501	-0.00871886	0.0506537	0.0218876	0.0157114	0.0678446	-0.0184873
BRIX1	0.120229	-0.15489	-0.0171261	0.00792505	-0.0057027	0.00836998	0.00107959	-0.0714483	0.155145	0.0288526
BRK1	-0.000620888	-0.15858	-0.0325654	-0.0165184	-0.00786873	-0.018781	0.0975084	-0.0179017	0.101277	-0.0126591
BRMS1	-0.0838626	0.0144189	0.110832	-0.00560378	0.0219672	-0.0442595	-0.0725515	-0.00200959	-0.116689	-0.0907745
BRMS1L	0.108895	-0.24408	0.0502451	-0.00271865	0.00415402	0.0140937	0.0938511	0.0477084	0.245616	0.0756254
BROX	-0.0861285	-0.0389449	0.0306593	-0.0141415	-0.0422084	0.00480692	-0.0366915	-0.0790495	0.0814955	-0.0278813
BRPF1	0.0191518	-0.113973	0.123905	-0.00897803	0.00223585	-0.038248	-0.0308345	0.00590696	-0.0146724	-0.067043
BRPF3	-0.25895	-0.0928063	-0.0246367	-0.0182394	-0.0300706	0.00203629	0.0561274	0.0179998	0.0217924	-0.0304595
BRSK1	0.143713	0.212799	-0.111313	-0.0343638	0.0225095	0.000186149	0.0336383	0.0551758	-0.0579835	-0.0724913
BRSK2	-0.00942842	0.166319	-0.0872657	-0.0239267	0.0195789	-0.0156584	0.0870436	0.142097	-0.00284923	-0.0324325
BRWD1	-0.109905	0.0593649	-0.0585214	-0.0105724	-0.0044552	-0.0301773	-0.0573287	-0.0198749	0.0744612	0.0212087
BRWD3	0.026766	0.0934874	-0.0118443	0.010321	0.0156563	-0.0224177	-0.0388785	-0.0436898	0.0572033	0.0784065
BSDC1	-0.118507	0.160317	0.0348958	-0.00477406	0.0163857	-0.037068	0.059787	0.0572656	0.0319997	0.0369661
BSG	-0.656966	1.07774	0.0286195	0.0520567	0.0358669	0.021038	0.114161	0.00114347	-0.0354795	-0.0106648
BSN	-0.0195679	0.115492	-0.0286731	-0.0456162	0.0135021	-0.0480587	0.126359	0.127448	0.0433746	0.00565385
BSPRY	NA	NA	0.100435	0.128309	0.0922586	0.0561758	0.168794	0.140753	-0.117795	0.215775
BST2	0.472878	-0.0378784	0.543936	0.182176	0.0234676	-0.0447967	-0.122376	-0.276836	-0.281096	-0.073491
BTAF1	0.156503	-0.0663921	-0.0262777	0.0138518	0.00944491	-0.0564414	-0.0489004	0.0156063	0.0825982	0.0866697
BTBD1	NA	-0.133262	-0.00558076	-0.00962963	-0.00539477	-0.0149786	0.0845243	0.0106198	0.131064	0.0168727
BTBD10	-0.0596728	-0.0325223	-0.053522	-0.021313	-0.00983592	-0.0449146	0.0630191	0.0250455	0.0945167	0.00394305
BTBD11	0.194209	-0.279045	-0.0625609	0.0351837	0.0764073	-0.00989853	-0.0318572	0.0493072	-0.0568507	-0.0893346
BTBD17	NA	-0.618444	0.203246	0.0257951	-0.0254482	0.00896632	-0.046721	-0.221858	-0.314768	-0.0956304
BTBD18	NA	0.13686	-0.00442403	-0.0557704	-0.00606765	NA	-0.113085	0.0300747	-0.0242532	0.133896
BTBD19	NA	NA	0.0976408	-0.0283384	-0.105648	-0.0156728	-0.140791	-0.0229666	-0.0138099	-0.0788893
BTBD2	NA	NA	0.0284422	0.0337214	0.0427645	-0.0206722	0.0919521	0.0801144	-0.0426664	0.0202178
BTBD3	-0.499577	-0.255074	-0.0760238	-0.00486529	0.016886	0.00936749	0.143592	0.0788022	0.131347	0.0341327
BTBD6	-0.13225	0.303294	-0.0230321	-0.0271371	0.00634594	-0.00873664	0.0753112	0.0564193	0.0130638	-0.0305789
BTBD7	-0.0245112	-0.0817324	0.0270483	-0.00197015	-0.00589981	-0.0219326	-0.0700836	-0.0758825	0.00233909	0.0457978
BTBD8	-0.0675884	-0.0798328	-0.0342113	-0.0290314	-0.0380025	-0.0100495	-0.0189009	-0.0625939	0.0142184	0.00331709
BTBD9	-0.0803234	0.117877	0.108969	0.0176091	0.025484	-0.0362777	0.129781	0.105508	0.0913153	0.0868569
BTC	NA	-0.0536445	-0.00584623	0.0442455	-0.0373354	NA	0.247387	0.141823	0.0741114	0.00373314
BTD	-0.213287	-0.117091	-0.0785267	-0.00838103	-0.00350317	0.0297979	0.0395223	0.030461	0.0460039	0.0187689
BTF3	0.0413524	-0.0897199	0.00652969	0.00956398	-0.00840413	-0.0158433	0.130783	-0.0485039	0.047485	0.0580174
BTF3L4	0.0753168	0.0171783	-0.0910651	-0.0297007	-0.00686947	-0.0238914	0.0601521	0.00554359	0.148405	0.00951823
BTG1	-0.0204605	-0.0182235	0.247677	0.115457	0.0938815	0.0125461	0.155564	0.0442177	0.0946742	0.270419
BTG2	0.638031	-0.0813061	0.141076	-0.0357181	0.0295999	-0.0399951	-0.0267733	-0.119665	0.0200085	0.324913
BTG3	0.170561	-0.0605358	0.18651	0.0855008	0.110677	0.031324	0.237577	0.0271124	0.140389	0.16816
BTN2A1	0.157052	-0.128044	0.0140756	0.0209316	-0.0202936	-0.0251486	-0.00848081	-0.0238614	0.0331868	-0.0399036
BTN2A2	0.187634	0.186017	0.177256	0.114815	0.00215576	-0.00460873	-0.113702	-0.0609721	-0.083446	0.0331045
BTN3A1	0.271146	0.105038	0.250461	0.033431	-0.0104433	-0.0209392	-0.224012	-0.21071	-0.172447	-0.205093
BTN3A2	0.291233	0.000331711	0.274969	0.042864	-0.0815086	-0.0776956	-0.308479	-0.3277	-0.155342	-0.36777
BTN3A3	0.354298	0.103019	0.234806	0.0730963	0.0303473	0.0366144	-0.142359	-0.200926	-0.0288325	-0.0976289
BTNL2	0.0874225	-0.127597	0.151367	0.155025	0.094298	0.100662	-0.0856688	0.165059	0.0119047	0.0478094
BTNL9	-0.0362687	0.258047	-0.113338	0.0309106	-0.0159334	-0.0108849	-0.266715	-0.0264637	-0.306081	-0.055568
BTRC	-0.0326827	0.099698	-0.0283136	-0.00854242	0.00978124	-0.017635	0.0804762	0.0646729	0.176524	0.053207
BUB3	0.0772844	-0.00423731	-0.0190266	-0.000425748	0.0048381	0.0324933	0.0370924	-0.052295	0.0969826	-0.0120518
BUD13	-0.0304973	0.00802485	-0.0278819	-0.00774901	-0.0177578	-0.0364219	-0.0877874	-0.0585198	-0.00843256	0.0089563
BUD31	0.000661656	-0.0264107	0.0396999	-0.000704079	0.00249956	-0.021809	0.0962426	-0.0195713	0.0258615	-0.0387774
BVES	0.0609219	-0.00288763	-0.0243787	-0.0607311	-0.054813	0.0102664	-0.176853	-0.190884	-0.077163	-0.0572327
BYSL	0.0857022	0.0940652	0.0641536	-0.0133537	-0.0146021	0.00271052	0.0559248	0.0417776	-0.0337526	-0.100341
BZW1	0.123873	-0.371642	-0.0379844	-0.0452615	-0.0220697	-0.0548378	0.0225168	-0.0352874	0.117322	0.0108129
BZW2	-0.260193	0.141158	-0.0794926	-0.0096962	0.0545392	-0.0284105	0.149562	0.133773	0.176827	0.0256712
C10orf113	NA	-0.153896	0.10278	-0.00768758	0.011702	NA	-0.142345	0.0722755	-0.0441961	0.0654442
C10orf82	-0.0456425	-0.000526099	0.0941453	0.0187257	-0.0102065	0.0430926	-0.144963	0.180656	0.0613248	0.0486494
C10orf88	-0.00801356	-0.204721	-0.0413262	0.011447	0.00738361	-0.0248851	0.0505035	0.00591917	0.150445	0.0247403
C10orf90	-0.0185252	0.0522723	-0.146723	-0.0059297	-0.0470719	0.0922692	-0.333893	-0.0488442	-0.130207	-0.0769194
C10orf95	-0.0316197	0.104989	-0.0482644	0.0265954	0.0255521	0.0258109	-0.232124	NA	-0.162176	-0.233084
C11orf1	-0.110516	-0.11684	0.000163711	-0.0176886	0.0124376	-0.0781739	-0.00782318	-0.0640344	-0.0553935	0.0045061
C11orf24	0.0600661	-0.00627196	-0.141062	-0.055412	-0.0214853	-0.0324812	-0.0294015	0.0337073	-0.0351873	-0.0834044
C11orf42	0.0102838	-0.00951167	0.051009	-0.0869225	4.17e-05	-0.00718321	-0.0684357	0.0510958	-0.0799634	-0.0613438
C11orf45	0.0312843	0.0357926	0.265251	0.00607379	0.0889789	0.00659262	0.00227225	0.127642	-0.0104374	-0.0318985
C11orf49	-0.141925	0.0584248	-0.00269938	0.00571161	0.0341657	-0.00325896	0.0748667	0.0154568	-0.0128202	-0.0178198
C11orf54	-0.435498	-0.164179	-0.0553983	0.00269509	-0.0426569	0.00214022	-0.115639	-0.00381545	-0.00560202	0.0284167
C11orf58	0.0480106	-0.0614022	-0.0234277	0.0079007	0.0128852	0.000573361	0.0825244	0.00317485	0.0817545	0.0595289
C11orf65	-0.0151454	-0.0300932	-0.100855	0.0115666	-0.0122858	0.0121088	-0.206079	-0.150456	-0.144483	0.0224103
C11orf68	-0.0487144	0.413981	-0.057234	0.0088223	0.00756824	-0.0235241	0.147789	0.0676413	0.00321012	-0.00663655
C11orf71	NA	NA	-0.133257	0.068191	0.0197042	-0.045814	-0.0066239	-0.125356	0.0136524	-0.100806
C11orf74	-0.105285	0.0588036	-0.0773914	0.0122713	-0.00300368	0.0283621	0.0303564	0.0289971	0.0799192	0.0565484
C11orf80	0.197855	-0.113718	0.0151919	0.00628626	-0.0101633	-0.0556038	-0.0516914	0.0306791	-0.00236344	0.0260656
C11orf87	-0.0358257	-0.108616	-0.0828277	0.000936615	0.0175084	0.0583646	0.153756	0.134584	0.170696	0.00693927
C11orf91	NA	-0.00057234	0.122462	0.140372	0.0762782	NA	0.240894	NA	0.110742	0.0987341
C11orf95	-0.00688983	-0.065797	-0.0190538	-0.00573985	-0.00468969	-0.0571574	0.127588	0.0605749	-0.0395664	0.0254285
C11orf96	0.58389	0.190013	0.410815	0.149851	0.164835	-0.00628264	0.41426	0.244762	0.250406	1.09713
C12orf10	-0.00450422	0.242903	-0.099699	-0.0126729	0.00304649	-0.0756485	-0.00637214	0.00933542	-0.0793748	-0.113921
C12orf29	-0.0538028	-0.142646	0.0317137	0.0394116	0.0273285	0.0140906	0.128615	0.0472281	0.170647	0.0523022
C12orf4	0.0689638	-0.201999	-0.0427627	-0.0170007	-0.0112254	-0.00452115	-0.00334086	0.0107043	0.156711	0.0102191
C12orf43	0.0139298	-0.176961	-0.0373858	0.000277323	0.0110326	-0.00707553	0.0784867	0.0671139	0.0832063	0.0254968
C12orf45	0.046204	-0.0950969	-0.0331084	0.0325532	0.052325	-0.0125629	0.0445463	0.00670505	0.106516	-0.0202593
C12orf49	-0.175199	-0.155725	-0.00229536	-0.0480731	-0.0158164	-4.67e-05	0.0139686	-0.0337854	0.00871494	-0.0289513
C12orf54	0.0325308	-0.0448342	-0.165613	0.025102	0.240946	0.0382734	-0.26022	0.270193	0.111891	-0.0471664
C12orf57	-0.109492	-0.0397299	-0.0592983	-0.0473909	-0.0571265	NA	0.0267006	-0.0485835	-0.0784256	-0.125122
C12orf60	0.041716	-0.0972807	0.0806193	-0.00839867	0.00835326	0.00397654	-0.203528	-0.128082	-0.180148	-0.000623727
C12orf65	-0.0327618	-0.216005	0.0233348	0.0047045	0.0160481	0.0395936	-0.0301665	-0.00935783	0.0352939	-0.000276499
C12orf66	-0.0237282	-0.0794413	-0.0589803	0.00778447	0.013278	0.0754666	0.0150962	0.0226602	0.039996	-0.00182393
C12orf71	NA	0.0723871	0.160374	-0.0718078	-0.0415073	NA	-0.386124	NA	-0.00464354	-0.0920886
C12orf73	NA	NA	-0.0501029	0.036836	0.0557396	-0.0507977	0.0350158	-0.0221275	0.037188	-0.0672641
C12orf75	0.24683	0.0167176	0.180636	-0.0606706	-0.0267081	-0.0259791	-0.0599925	-0.135152	-0.0947931	-0.0868695
C12orf76	-0.0633534	-0.0889025	-0.00535883	-0.0373052	0.00574034	-0.0638765	0.0149543	0.0377393	0.0443512	-0.0328436
C14orf119	-0.0186361	-0.149739	-0.0238317	-0.0619879	-0.0438975	-0.0627979	-0.0435449	-0.0635709	0.0294128	-0.0635276
C14orf132	0.201601	-0.115498	0.055252	0.0306003	0.064657	-0.0119006	0.153329	0.079182	0.073857	0.0899028
C14orf180	NA	-0.0428069	-0.278228	-0.0511252	-0.0930395	0.100618	-0.00980891	0.227852	-0.111199	0.317411
C14orf28	-0.176596	-0.0489553	0.00914821	0.0175739	0.0356988	0.0194262	0.0727648	0.00131203	0.118602	0.191828
C14orf93	-0.18904	-0.139233	0.0114402	0.0233979	0.0149482	0.0078892	-0.229296	-0.17793	-0.166301	-0.013208
C15orf39	-0.056025	0.0631744	0.180296	0.0801499	0.0763913	0.048697	0.0195513	0.0704853	-0.0877283	0.288523
C15orf40	-0.1327	0.0917094	-0.00897782	0.0305955	0.0618704	-0.00302732	-0.00814531	0.0449323	0.0657214	0.162595
C15orf41	-0.0347474	-0.046625	-0.0801544	0.0399129	0.00122391	0.0600714	-0.0205716	0.0342491	-0.0713919	0.0353216
C15orf59	0.0135368	-0.241727	-0.00385654	-0.0553194	-0.0152949	-0.0595353	-0.0182784	0.0152788	-0.106196	-0.0764954
C15orf61	-0.170295	0.247236	-0.0906877	-0.00923725	0.00186921	-0.0730759	0.0507979	-0.0754295	-0.0429614	-0.0857643
C15orf62	-0.0159316	-0.0714632	-0.0409904	-0.0279201	-0.048466	-0.0232681	-0.134216	0.027268	-0.175531	-0.0367469
C15orf65	NA	NA	-0.0717011	-0.0604452	-0.0482628	-0.0468717	-0.16537	NA	-0.2199	-0.114587
C16orf45	NA	NA	-0.127695	0.0029225	0.0509179	-0.0304153	0.174379	0.112813	0.139431	0.00851102
C16orf46	-0.0026612	-0.0600629	-0.032091	-0.00827724	0.00974008	0.0390136	0.0350294	-0.0292472	0.0582289	-0.0442512
C16orf58	0.0396433	0.0353862	-0.0418618	0.0248678	0.0602973	-0.00697396	0.0680331	0.107316	-0.000130457	0.0664581
C16orf70	-0.0708717	0.223065	0.000324296	0.00305288	0.0226824	0.0408159	0.138182	0.143659	0.113186	0.0637784
C16orf71	-0.00828557	-0.0655395	-0.0438715	0.00155161	-0.0762854	0.00627416	-0.186292	-0.0168626	-0.268459	-0.127986
C16orf72	-0.0409652	-0.000121714	0.082624	-0.00268299	-0.00327179	-0.0259921	0.0587682	0.0299691	0.0861444	0.00079845
C16orf74	0.0578632	-0.0182821	0.212464	-0.0242519	-0.0245897	-0.0652533	-0.325221	-0.398733	-0.414128	-0.0891533
C16orf86	0.09808	0.112827	-0.131673	0.00640482	0.0655207	0.0215283	-0.0632955	-0.00474383	-0.0866195	0.0604804
C16orf87	0.0211539	-0.223596	-0.0136967	0.0203965	-0.0128126	-0.0270596	0.120146	0.0842124	0.151819	-0.0221116
C16orf89	-0.00301302	0.00262666	0.393983	0.119385	0.0971343	0.0295309	0.0655059	-0.00543216	-0.0856467	0.162263
C16orf91	NA	0.0614704	0.0180564	0.0346659	0.0373315	-0.0371022	0.103825	0.0741735	0.061538	0.0421099
C16orf92	NA	NA	-0.103782	0.0371454	0.0915573	0.0634994	-0.206549	NA	-0.183822	-0.00228423
C16orf95	NA	NA	-0.0403205	-0.0166545	0.00962469	-0.0137748	-0.0663527	-0.0285142	-0.0985132	-0.0246216
C16orf96	NA	-0.0316687	-0.0770004	-0.0620418	-0.0327636	NA	-0.165564	-0.139344	-0.213669	0.00634029
C17orf100	0.0378092	-0.0210581	-0.130037	-0.0876911	0.0495512	-0.00811599	0.0654366	-0.0394437	0.0340448	0.0272195
C17orf50	NA	-0.0316461	0.0706944	-0.0200743	-0.0917846	0.0261273	-0.062872	0.0311167	-0.360022	-0.0851792
C17orf51	-0.0243269	0.0134934	0.0618787	-0.00980762	0.0257744	-0.0320314	0.0738109	0.0803624	0.0673605	0.0404862
C17orf53	-0.0338946	-0.0211692	-0.0374478	0.0212868	0.0110637	-0.0139123	-0.0720569	0.19747	-0.110535	0.239796
C17orf58	-0.0165069	-0.145153	0.0174279	0.0729142	0.0630303	0.0720795	0.163898	0.0459752	0.128278	0.124678
C17orf67	0.0668364	-0.0394778	0.303567	0.0292583	-0.0194064	-0.0300101	-0.143733	-0.0640234	-0.145325	-0.0713295
C17orf75	-0.117706	0.0759295	-0.145746	-0.0288538	0.00701339	0.0406468	0.0214738	0.0130825	0.0858788	0.0273085
C17orf78	0.066273	0.0398059	-0.104737	-0.0694914	-0.0970272	-0.000208074	-0.245541	-0.0400499	-0.110272	-0.142732
C17orf80	0.0477124	-0.037048	0.0256724	-0.00621026	-0.0165841	-0.0242718	-0.0260634	-0.104911	0.0426095	0.0129974
C17orf97	-0.48015	-0.0120564	-0.130322	-0.00534781	-0.0311635	-0.0308797	0.00934932	-0.0610057	-0.0124835	-0.0867584
C18orf21	-0.00133985	-0.142257	-0.0164604	-0.00927682	0.0120003	-0.0382624	0.104436	0.0431475	0.152366	-0.0485429
C18orf25	-0.0104957	-0.305531	-0.0342436	0.00956075	-0.00132504	-0.0442051	-0.0197981	-0.0140617	0.068086	-0.0202031
C18orf32	-0.0717365	-0.0861663	-0.01546	-0.0255892	0.00790177	-0.0122907	0.0533132	-0.0631691	-0.097064	-0.0984687
C18orf54	-0.0564081	-0.131663	-0.0326995	-0.0346342	-0.0694276	0.0680133	-0.115845	-0.0474312	0.00318038	0.0821251
C19orf12	-0.017457	0.110146	0.0281298	-0.00495426	0.0293451	0.00545888	0.0820847	0.0698765	0.0409287	0.0026229
C19orf18	-0.10505	-0.0431459	-0.214653	-0.0416474	-0.0305644	-0.0419807	-0.321094	-0.044598	-0.0973083	-0.067855
C19orf24	0.0317347	0.225784	0.0625175	-0.0221402	-0.0655419	-0.043469	-0.0256104	-0.0115218	-0.173903	-0.181321
C19orf25	-0.128293	0.186585	0.0851666	0.0434218	0.0551354	-0.0286948	-0.0733393	0.0447689	-0.154739	-0.0919422
C19orf38	0.0639128	0.069317	0.104069	0.0923781	0.0892934	NA	-0.119604	NA	-0.112502	-0.00705042
C19orf44	0.0316335	-0.166003	0.0873495	0.0295287	-0.00492502	0.0449005	-0.168667	-0.0353758	-0.1148	0.0196081
C19orf47	0.0231537	-0.00878408	-0.0529692	-0.0218762	0.00362042	0.0320433	-0.0252007	-0.0284611	-0.109875	-0.00562667
C19orf48	-0.0222831	0.119578	-0.114196	-0.0461675	0.0219069	-0.0244446	-0.0118591	0.0120126	-0.201347	-0.0540024
C19orf53	0.147898	0.0287151	0.0105814	-0.0329859	-0.00255003	-0.0263777	0.134291	-0.0135565	0.0189997	-0.0822631
C19orf54	NA	-0.0979424	0.0708364	0.0373731	-0.0341163	0.00779281	-0.107418	-0.0858457	-0.132626	-0.0918929
C19orf57	-0.0699744	0.0353462	-0.0224577	0.0297008	0.0405392	-0.00757593	0.0671409	0.172561	0.0356893	0.115265
C19orf66	0.300036	0.0923669	0.0252787	0.033331	0.048191	-0.0037166	-0.0265785	0.0742855	-0.0620609	-0.0500505
C19orf70	-0.232	0.226316	-0.0407059	-0.00284037	0.0341127	-0.0604319	0.0575365	0.0490271	-0.0648049	-0.109834
C19orf73	-0.0729252	-0.0347321	0.138714	0.0240432	-0.00133923	0.0194354	0.0443163	-0.176996	-0.162384	-0.150797
C19orf81	NA	0.117558	0.0463392	0.0471749	-0.0190932	-0.0249776	0.116376	0.116382	0.104833	-0.0352676
C1D	-0.00670425	-0.0156069	-0.0410528	-0.0350798	0.0172681	0.00330558	0.0189294	-0.00480603	0.0718801	0.0657962
C1GALT1	0.185395	-0.054095	-0.0228845	-0.0194825	-0.00624398	0.0136141	0.0243952	-0.0740785	0.0819938	0.00823554
C1GALT1C1	-0.0030786	-0.0430083	-0.0448001	-0.0244497	-0.0160961	-0.0517646	0.00458413	-0.0796269	0.0642909	-0.0204556
C1orf109	0.0174123	0.121267	0.0375131	0.00869356	0.00945404	-0.0239809	0.0455815	0.0499731	0.0740195	-0.0384335
C1orf112	-0.0239962	0.0717048	-0.0717351	-0.0771925	-0.0696244	-0.0222967	-0.12475	0.0230517	0.0632802	0.0776356
C1orf115	-0.725001	0.223364	0.0133043	0.0540778	0.0599911	0.0383811	0.210203	0.118658	0.166884	-0.00650229
C1orf122	0.0585895	0.264657	0.0549016	-0.024357	0.0132637	-0.0028669	0.0273347	0.0246577	-0.196647	-0.111319
C1orf123	-0.0603754	0.0283406	-0.0318164	-0.0299684	0.0205652	-0.00756851	-0.0324996	-0.0192085	-0.0233638	-0.0159085
C1orf131	-0.194376	-0.238269	-0.0225675	-0.00259251	-0.00349378	-0.031827	-0.107318	-0.133274	-0.0531285	-0.0962581
C1orf159	-0.0492754	0.399236	-0.0646403	-0.0244762	0.0697862	-0.0334107	-0.104797	0.0748741	-0.184017	-0.0372822
C1orf162	0.399473	0.541435	0.0414551	0.108465	0.127009	-0.125255	-0.0122575	-0.0209407	-0.00929413	0.0649393
C1orf174	NA	NA	-0.0392869	-0.0109816	-0.00490991	-0.0121734	-0.0393936	-0.0447872	-0.0408338	-0.0575591
C1orf194	0.0133036	0.0588109	-0.0484398	-0.0400869	0.00429371	0.0150647	0.062591	0.00128752	0.0476056	-0.196598
C1orf198	0.0942771	0.184283	0.102368	0.0587406	0.0359973	-0.020465	0.101389	0.0063339	-0.0134931	0.0853662
C1orf21	-0.210969	-0.0335355	0.0456675	-0.0102871	0.00714191	-0.0726163	0.0487701	0.00656557	0.0941517	0.00242757
C1orf216	0.166284	0.194881	-0.104296	0.0118895	0.00503766	-0.0393788	0.115364	0.0883579	0.0602034	-0.0388112
C1orf226	-0.0924737	-0.0769092	0.154674	0.0323275	-0.00872959	-0.0160867	-0.090345	0.0569912	-0.0895263	-0.0363972
C1orf35	-0.153754	0.197111	0.0870828	0.00545137	-0.00591337	-0.0134619	-0.0203778	0.0605855	-0.105343	-0.128575
C1orf43	-0.0801392	-0.182137	0.00359266	0.00278496	0.0194563	-0.0108285	0.126333	0.0297156	0.0572789	0.00324997
C1orf50	-0.0757005	0.0234307	0.00437532	-0.0250563	0.00755853	0.0204687	-0.0108501	-0.11717	0.0229131	-0.0510124
C1orf52	-0.0611976	-0.189536	0.0302755	-2.74e-05	0.00620412	-0.0244273	0.0826039	0.0894695	0.133614	0.0287221
C1orf53	-0.196353	-0.133554	-0.020892	-0.075542	-0.0771524	-0.133991	0.250406	NA	-0.0693021	-0.528347
C1orf54	NA	NA	0.167486	-0.011714	0.0227251	0.0165344	-0.113631	-0.105852	-0.0377634	0.076983
C1orf56	-0.0325757	0.0100059	0.0707947	0.00804297	-0.0321093	-0.0141151	-0.0880538	-0.0212633	-0.102734	0.120263
C1orf61	0.0525501	-0.0225459	-0.0102015	-0.0630537	-0.0287061	-0.0671559	-0.275204	-0.239953	-0.29674	-0.19855
C1orf74	-0.062071	-0.152984	-0.144402	-0.0228688	-0.0179607	0.0105972	0.05282	0.0357293	-0.0134619	0.0207022
C1QA	0.341803	0.143087	0.284992	0.0391328	-0.136576	-0.119988	-0.264047	-0.51905	-0.216538	-0.466893
C1QB	0.496424	0.849813	0.432914	0.0967455	-0.0427258	-0.138247	-0.364942	-0.468244	-0.277612	-0.421247
C1QBP	-0.118934	-0.194634	-0.0345896	0.0129596	-0.00500501	-0.0261745	0.155506	0.030768	0.0420875	-0.00682588
C1QC	0.234837	0.632449	0.339963	0.0962479	0.0180339	-0.126929	-0.209183	-0.248287	-0.235278	-0.307341
C1QL1	0.0342788	0.420781	0.242148	0.105416	0.0892973	-0.0250062	0.231271	0.0712597	-0.0525307	0.118447
C1QL2	0.0192663	-0.112477	-0.0862137	0.00750637	0.0454765	NA	0.396963	0.0959972	0.0800422	0.0477591
C1QL3	-0.0263453	0.0788941	0.153437	0.0330507	-0.0116436	NA	0.260611	0.211835	0.172709	-0.0300224
C1QTNF1	0.441756	0.344945	-0.00342478	-0.0431036	-0.120501	0.00363309	-0.0181461	0.0313633	-0.0322374	0.528446
C1QTNF2	-0.00298892	-0.0827467	0.0451143	-0.0468024	-0.0704786	0.0413699	-0.149884	-0.20368	-0.0971669	-0.196376
C1QTNF3	0.036683	0.294402	0.0536621	0.0378185	0.0360865	-0.0511695	-0.106762	-0.0917353	0.0320077	0.0724998
C1QTNF4	0.0158562	0.348513	-0.0929023	-0.0442129	-0.0349398	-0.108055	0.166219	0.00819614	-0.16851	-0.143054
C1QTNF6	0.28329	0.037321	-0.00629756	0.0806718	0.0014661	0.0213168	-0.107342	0.104769	-0.118136	0.119213
C1QTNF7	-0.0190579	-0.165808	0.0617144	-0.0753346	-0.163632	-0.0325374	-0.00419758	-0.0470676	0.00786403	0.261609
C1R	0.733443	0.218715	0.409556	0.262634	0.110018	0.0113301	0.262251	0.144613	0.172049	0.425667
C1RL	0.253159	0.0453152	0.00794904	0.0958149	0.100252	0.0374322	0.153564	0.210877	0.148175	0.322648
C1S	0.747775	0.203724	0.269314	0.143978	0.0411691	-0.0299538	0.146123	0.0643691	0.142506	0.326727
C2	0.518418	-0.000760403	0.333715	0.0566582	0.0635779	-0.0273025	-0.108721	0.261054	-0.0148393	0.142306
C20orf144	-0.00155622	0.0839319	0.0476817	0.0441117	-0.0515996	0.00305736	-0.10078	0.0677753	-0.17185	-0.125545
C20orf194	0.162153	-0.0501914	0.0132193	-0.00681256	-0.0116175	-0.0307647	-0.0349075	-0.0114694	-0.022309	0.00587648
C20orf203	0.00273712	0.0367091	-0.172058	0.0538759	0.189857	0.0511061	0.0758353	0.26381	0.0168021	0.328354
C20orf27	0.01396	-0.282134	0.0681546	-0.0189669	0.0300017	-0.0283989	0.0891974	0.0245254	-0.175162	-0.0405098
C20orf96	-0.00847351	0.0317927	0.0893866	0.0552491	0.0541364	0.0906941	-0.0271517	-0.0191009	-0.0893704	0.00290391
C21orf2	NA	NA	-0.0771448	-0.0234609	0.012804	-0.0436328	-0.068597	0.0397175	-0.17295	-0.0681234
C21orf58	-0.22329	-0.0305594	0.0172511	-0.0100376	-0.00186786	0.0396637	-0.181493	0.121996	-0.1438	0.0654412
C21orf62	0.00981936	-0.0327383	0.154441	0.21302	0.0112271	0.0777527	-0.167862	0.0343439	-0.0910218	0.097066
C21orf91	0.0665207	-0.0579124	-0.275046	-0.0894163	-0.137246	0.0284538	-0.255654	-0.220699	-0.027111	-0.212781
C22orf15	0.000558805	0.040265	-0.129754	-0.0833803	-0.102663	0.0988252	-0.227492	-0.0367197	-0.226439	-0.0993539
C22orf23	-0.0548535	-0.079377	-0.095592	-0.024901	0.0643009	-0.000976028	-0.231672	-0.015261	-0.203864	-0.0833939
C22orf39	-0.000875772	-0.0296289	0.00949225	0.0223647	0.0209937	-0.00380269	0.0743603	-0.0113733	0.0257172	0.0261884
C22orf46	-0.10731	0.205013	0.0999205	-0.0141528	-0.0612097	-0.0247758	-0.126379	-0.180305	-0.128034	-0.09196
C2CD2	0.22562	0.224494	0.116861	0.0937444	0.0594871	0.0194794	0.0538794	0.081551	0.0265319	0.142444
C2CD2L	-0.121676	0.185678	-0.0848272	-0.0174682	0.021798	-0.0305566	0.059495	0.0441027	-0.0203046	-0.0637719
C2CD3	-0.00209791	0.0742712	-0.020203	-0.0323251	-0.00744971	-0.002667	-0.0282815	0.0423457	0.0424489	-0.0175694
C2CD4B	1.09956	-0.167292	0.136804	0.00224171	-0.0727093	-0.00708402	0.494181	0.763422	0.96313	1.24712
C2CD4C	NA	NA	0.0871789	0.0184792	0.0422073	-0.0730709	0.0994859	0.066835	-0.123866	-0.062
C2CD5	-0.304189	-0.0594846	-0.122427	-0.0204924	-0.00444768	-0.0341237	-0.00503496	0.0038813	0.100517	0.0211823
C2orf15	-0.0502389	-0.192103	-0.224686	-0.0875209	0.0469047	-0.00287479	0.0157766	-0.0908378	0.0169821	-0.0304338
C2orf16	-0.0023705	-0.0142666	-0.141048	-0.0146076	0.112714	0.0455642	-0.0420168	0.017296	0.0393717	0.000804604
C2orf40	0.0149583	-0.0249688	0.0889539	-0.00465907	0.00441851	-0.0110759	0.212382	-0.0341531	0.312925	0.204739
C2orf42	0.0140664	-0.203483	0.00699982	0.00164261	-0.0376616	-0.00864466	-0.0505977	-0.0807611	0.0348402	-0.0492282
C2orf49	0.0373563	-0.0602106	0.0478258	0.00249128	0.00950398	-0.0240417	0.0343611	-0.0802803	0.0581743	0.0133559
C2orf50	0.0105421	0.109585	-0.0824678	-0.0732308	0.0245366	-0.0830981	0.0946443	0.0320677	0.0628874	-0.0260842
C2orf68	-0.217217	-0.158873	-0.0358491	-0.0564827	-0.0277491	-0.0771478	-0.208567	-0.138066	-0.143607	-0.0802189
C2orf69	-0.0536737	-0.0731994	0.0691283	0.015547	0.0134161	0.0167839	0.127714	0.00757974	0.159607	0.0145561
C2orf72	NA	NA	0.0243126	0.03393	0.0356827	0.00562955	-0.00292789	-0.0142508	-0.109708	0.00185006
C2orf73	-0.00357902	0.00340237	0.170022	-0.0145978	-0.0512582	0.00064327	0.110789	-0.0913688	-0.0444566	9.09e-05
C2orf76	0.00418493	-0.243433	-0.0121951	-0.000961446	0.021962	0.00442825	0.0878581	-0.045072	0.115207	0.0416003
C2orf80	NA	NA	-0.00509568	0.033779	0.0343124	-0.0287497	0.125574	0.0904881	0.175076	-0.00959016
C2orf88	-0.553608	0.0179752	0.0418329	0.0130432	-0.0111508	0.0385833	-0.187447	-0.0460644	-0.0566266	0.0749872
C3	0.791665	0.233941	-0.00926999	-0.17402	-0.18228	-0.15442	-0.447337	-0.441159	-0.234776	-0.425942
C3AR1	0.305737	0.0277875	0.106675	-0.167103	-0.184203	-0.122211	-0.317378	-0.59153	-0.19679	-0.437954
C3orf14	0.00495749	0.00972126	-0.0310452	-0.0296712	-0.0155989	-0.00241165	0.0257827	-0.0470679	0.162095	0.0011432
C3orf18	0.0682446	0.0798478	-0.12364	-0.00371954	0.00636115	-0.0560076	0.0285814	-0.0390894	-0.122804	-0.0498143
C3orf20	0.0212568	0.0945065	-0.057999	0.285697	0.315208	0.0457207	-0.217362	0.0506671	-0.162759	-0.303211
C3orf33	-0.00789507	0.0123897	-0.0841214	-0.0023112	-0.0136567	0.0394601	0.0550592	-0.0381887	0.0962403	-0.0589343
C3orf38	0.00806419	-0.139083	0.0226548	-0.0134511	-0.0261621	-0.0238431	-0.0408969	-0.0926007	0.12907	0.0166363
C3orf49	NA	NA	-0.14736	-0.0899406	-0.00399002	0.0515406	-0.014096	-0.0225753	0.0478043	-0.12603
C3orf58	-0.0445906	-0.139962	0.025784	-0.00649124	-0.0514466	-0.00293972	0.0852932	-0.0107043	0.0498796	0.0143553
C3orf62	0.013488	-0.0729111	0.0547948	-0.0115399	-0.0262774	-0.0310858	-0.0897642	-0.0279867	-0.0442573	-0.067562
C3orf67	NA	-0.027904	-0.0436676	0.0217615	0.0243017	0.00216821	-0.0481076	0.117051	0.108014	-0.0612507
C3orf70	-0.0644183	-0.123096	0.146152	0.0653807	0.0378228	-0.0261252	0.102221	-0.0592652	0.00100036	0.0621118
C3orf80	0.00970112	0.0655595	-0.211136	0.014648	-0.0263175	-0.044536	0.0975308	0.0263473	0.00607996	-0.180244
C4A	0.0511917	-0.0650267	0.675037	0.412813	0.0709843	NA	0.553725	0.394153	0.325291	0.50279
C4orf19	-0.221818	-0.0595489	0.164317	-0.0324326	-0.0256412	-0.0326052	-0.0169466	-0.0658532	-0.187273	0.0340331
C4orf3	0.0756402	-0.238211	0.0294247	-0.00488555	0.00724683	0.0145127	0.0779126	-0.129832	0.0218347	-0.0111107
C4orf33	-0.158683	-0.288139	-0.041758	-0.0393528	-0.0106785	-0.0122519	-0.054481	-0.0183974	0.0935597	0.000646526
C4orf36	-0.0723131	-0.0394009	0.0148172	-0.0322623	-0.0195383	-0.00616276	-0.0509623	-0.0594351	-0.106104	-0.0555659
C4orf45	-0.019376	-0.036946	-0.0276348	-0.0250228	-0.0177055	0.00760222	-0.137692	NA	-0.0442705	0.0735827
C4orf46	-0.050009	-0.130207	0.0489826	-0.0133152	0.00804068	-0.0594425	-0.0905538	0.0315514	0.0586088	0.00344973
C4orf47	0.015652	-0.153343	0.137767	0.0224459	-0.00421862	0.00593904	-0.0897411	0.0523501	-0.138605	0.0404785
C4orf48	-0.42141	-0.0594039	0.0391729	0.017561	-0.0523347	-0.0177377	0.104523	0.037382	-0.288814	-0.171141
C4orf50	NA	-0.0643101	-0.0638835	-0.132312	-0.0679739	NA	-0.0604675	0.0573933	-0.0699784	-0.0645798
C5	0.0659788	-0.29115	0.0123823	-0.0206634	0.00315047	0.0175813	-0.116058	-0.110008	-0.0924957	0.0974568
C5AR1	0.297778	0.131682	0.574209	0.0340746	0.0254389	0.0612219	-0.0204981	-0.0298985	-0.0542245	0.182157
C5AR2	0.0196869	-0.0186876	0.228536	-0.13239	-0.0808256	-0.0370925	0.0731159	0.198079	0.0869366	0.0551072
C5orf15	0.161966	-0.109249	-0.0493122	-0.0477525	-0.0224568	-0.040838	0.123212	0.00956325	0.127864	-0.011843
C5orf22	NA	NA	-0.0727291	0.0104657	0.00372136	0.000890026	0.0426961	0.026397	0.204743	-0.0260555
C5orf24	-0.0380705	-0.34341	-0.0106245	-0.0132628	-0.00191271	-0.0164593	0.0662849	-0.00958288	0.0756962	0.0367425
C5orf30	-0.446013	-0.00289529	-0.000110852	-0.0237613	-0.00374105	0.0302406	0.0975198	0.00989097	0.0644455	0.0146359
C5orf34	-0.050211	0.0621378	-0.0302587	0.0203065	0.0932529	-0.00404712	0.0570419	0.100445	0.151939	0.217923
C5orf49	NA	0.0525124	0.135461	0.142586	0.0566656	0.0511449	0.194963	0.130456	0.223154	0.0344134
C5orf51	0.0375439	0.0499581	0.0694659	0.0627165	0.0472932	0.00237955	0.0730545	-0.0260504	0.163719	0.111075
C5orf63	NA	0.0985808	-0.0385921	0.0524484	0.0069569	0.00748378	-0.125964	-0.235857	0.0292066	0.0299462
C6orf106	0.036561	0.360235	-0.0457596	-0.0204168	-0.0117002	0.0105477	0.0645309	0.0203712	0.0392665	0.00241588
C6orf118	-0.00829675	-0.080103	0.581228	0.095822	0.000600509	-0.0534455	-0.237875	-0.241369	-0.123579	-0.0296746
C6orf120	-0.107571	-0.196818	-0.0239812	-0.0328953	0.0178727	-0.0243852	0.12163	0.0119277	0.0282689	0.017891
C6orf136	NA	0.108211	-0.0965628	-0.00775059	-0.00364537	-0.0398657	0.0649018	0.0725427	-0.0351959	-0.043161
C6orf141	-0.111131	-0.164083	0.270083	-0.311108	-0.145729	0.0108524	-0.0877779	0.234771	-0.332048	-0.398443
C6orf163	NA	-0.043558	-0.0720366	0.0049782	0.0646078	0.0112848	-0.26198	-0.0248649	-0.0235527	0.0207006
C6orf203	-0.199971	-0.186856	0.00135817	-0.00173993	-0.0107514	-0.00979327	-0.0232678	-0.103397	0.0262713	0.00760546
C6orf223	-0.0024395	-0.0643203	-0.353371	0.12938	-0.0259512	-0.00220233	0.191052	-0.0148999	0.115987	0.217011
C6orf226	-0.0483127	-0.109963	-0.0685985	-0.0527209	-0.0506502	-0.0257733	0.00788332	-0.0210608	-0.168913	-0.0753591
C6orf47	-0.163291	-0.213872	-0.0299463	-0.00873803	-0.0057045	-0.0332908	0.0355792	-0.0576862	-0.0581548	0.0315172
C6orf48	NA	0.0395683	0.067804	0.0406708	0.0801587	NA	0.06149	-0.0724736	-0.0743078	0.00276589
C6orf52	-0.186572	-0.134068	0.118871	0.0140722	0.176247	-0.00802913	-0.381895	NA	-0.374472	-0.31318
C6orf62	0.0973253	-0.0619283	0.0584175	-0.0120818	-0.0288921	-0.0324963	-0.0451832	-0.0856262	-0.0325902	-0.0751615
C6orf89	0.00447853	0.0716463	0.0185647	-0.00374926	0.012464	-0.0216363	0.0680343	0.0116864	0.0697401	0.00702721
C7	-0.0518686	-0.00572806	0.112037	0.106964	0.0376808	0.00330723	0.246701	0.111825	0.150608	0.491189
C7orf25	-0.0676621	-0.137985	-0.0352048	-0.046251	-0.0624426	-0.0110893	-0.21762	-0.0336733	0.0432978	-0.0586496
C7orf26	0.00651281	0.399808	-0.0563363	-0.00262451	-0.00324258	-0.0335028	-0.0668055	0.0391905	-0.0706933	-0.0421774
C7orf31	-0.139646	0.0231843	-0.0106719	0.0549213	0.0531668	0.080606	0.0663527	0.0688879	0.0974405	0.281901
C7orf43	-0.133187	0.317432	-0.103726	-0.0402284	0.00704282	-0.0307522	-0.0221573	0.0262131	-0.0861985	-0.151918
C7orf50	0.0333362	0.171773	0.0325922	-0.0111759	0.0521807	-0.0271693	0.0463114	0.0442206	-0.0850506	-0.0136461
C7orf61	0.0371266	-0.0298713	0.360448	0.103809	-0.0508473	-0.0297123	-0.386304	-0.306005	-0.0427466	-0.305925
C8G	-0.023342	-0.0229967	-0.0335015	-0.0611596	-0.0906319	-0.031512	-0.184842	NA	-0.202358	-0.0935221
C8orf33	0.026415	-0.0172188	-0.00544209	-0.0323701	-0.00531712	-0.0443177	0.0291204	-0.0513819	-0.0552865	-0.0294632
C8orf34	-0.0347686	-0.209507	0.0466994	-0.0329009	-0.0738572	-0.0277403	-0.167533	0.0543312	0.078293	-0.0976872
C8orf37	0.000106735	0.0018213	-0.0397972	0.0187115	0.0302638	0.0154534	0.024238	-0.0191962	0.0123813	0.175061
C8orf44	-0.139546	-0.0794322	-0.0860266	0.00143496	0.0364553	-0.0399523	-0.00720047	0.0293765	0.0253857	0.0171375
C8orf48	-0.0469224	-0.0711152	-0.0216137	-0.0310911	-0.0806271	-0.000224797	-0.271104	-0.435171	-0.0996285	-0.177535
C8orf58	0.00789656	0.06112	0.113634	0.018233	0.063567	-0.00426282	-0.0700931	0.0366945	-0.129177	0.0312123
C8orf59	0.0420235	0.0366417	-0.0705279	-0.0401611	0.0532956	-0.0511153	0.0523417	0.00700345	0.13312	0.0480301
C8orf76	0.175155	-0.126305	0.0171928	0.0144073	0.0164612	0.00235976	-0.0143405	-0.0192472	0.0388156	0.0979853
C8orf82	NA	0.232038	0.107589	0.0260643	0.0517842	-0.025452	0.00768897	0.0397196	-0.156967	-0.0704885
C9orf116	0.110434	0.0606674	0.0750994	-0.0202794	-0.0275861	-0.029375	0.0459153	-0.0165617	-0.00760529	0.0249674
C9orf131	-0.0115488	0.0644215	0.0187085	-0.0405758	-0.0709043	0.0519498	-0.26142	-0.0909815	-0.207443	0.104294
C9orf16	0.0685083	0.243949	0.0965552	-0.0498306	0.0203297	-0.0373861	0.0889458	0.00308318	-0.0951336	-0.113993
C9orf24	-0.436842	-0.0586082	0.0337216	0.00177444	0.0298842	-0.0669977	0.00570993	-0.0855508	-0.105872	-0.0636104
C9orf3	0.118144	-0.0111923	-0.0412686	-0.0634392	-0.0448921	-0.0998411	-0.137011	0.0226748	-0.0211718	-0.0622975
C9orf40	-0.395903	-0.098322	0.062007	0.0399636	0.00576117	-0.0301181	0.137288	0.000878553	0.0797238	-0.0796899
C9orf43	0.04707	0.0346614	-0.0050962	0.0410724	-0.0491891	-0.0278955	-0.051575	-0.176601	-0.0844499	0.0156783
C9orf47	-0.00336873	-0.0399559	0.115923	0.0493785	-0.0290834	0.0528571	-0.0126827	-0.14803	-0.150638	0.265629
C9orf50	0.0268191	-0.0453181	-0.0296648	-0.0708318	0.0591181	-0.01783	-0.106258	NA	-0.0408102	0.437972
C9orf64	-0.0847844	-0.0730763	0.00636223	0.0298152	0.00910419	0.046605	-0.0312785	-0.0210028	0.0278002	-0.0574556
C9orf72	0.102186	-0.0201485	-0.0984626	-0.00878897	0.018493	0.0160412	0.00983077	0.101947	0.154528	0.0776668
C9orf78	-0.0941563	-0.196244	0.0532069	0.0127015	-0.00933763	0.0552977	0.057162	-0.0413687	0.0502179	0.0105954
C9orf84	-0.00982785	0.101342	0.225006	0.0120958	-0.0170944	0.0247128	-0.154842	-0.0944261	0.0856324	0.0921243
C9orf85	-0.140101	-0.0666623	-0.00761621	-0.0292626	-0.0220981	0.00641218	-0.0984577	-0.142377	-0.0662512	0.035139
CA1	-1.49473	0.0845933	0.115666	0.135223	-0.133777	0.0291191	-0.148814	-0.0656944	0.0844462	0.18481
CA10	NA	NA	-0.0508975	-0.00764737	0.0127757	-0.0112475	0.120703	0.0762591	0.121707	0.00227584
CA11	0.101464	0.533583	0.01706	-0.037705	-0.00101237	-0.0180719	0.153969	0.0306123	0.00315285	0.01001
CA12	-0.586864	0.155059	0.611746	0.188095	0.11793	0.0936468	0.256128	0.206957	-0.412034	0.300591
CA13	0.0489478	0.0154759	0.126872	0.0230517	0.0219099	0.0107163	0.00861796	0.00644099	0.0933445	0.0119314
CA14	-0.020389	-0.179755	-0.340695	-0.148346	-0.175029	0.0149846	-0.26721	-0.0819029	-0.0525834	-0.0804438
CA2	-0.573646	-0.44006	-0.0455248	-0.10174	-0.13312	-0.0720561	-0.0851332	-0.16341	-0.160494	-0.158359
CA3	-0.02089	-0.0918274	0.093886	0.0287784	0.0309552	0.0103465	-0.0120855	-0.0691696	0.0206826	0.256589
CA4	-0.466696	-0.225771	-0.266728	-0.10557	-0.00634011	-0.0106213	-0.0265346	-0.164094	-0.19321	-0.046412
CA5B	0.169546	-0.138549	-0.00562807	0.0304134	0.0357828	0.0481631	0.00234902	-0.0431115	0.00296785	0.122322
CA7	-0.502558	0.227085	0.0261136	0.0769069	0.0605115	0.0115586	0.186484	0.239122	0.0244361	-0.00207651
CA8	0.259605	-0.223905	0.206561	0.0375345	-0.0475646	-0.0135069	-0.0680115	-0.0697083	-0.00574597	0.0314171
CAAP1	-0.256351	-0.370516	0.0118738	0.00587809	-0.00416719	-0.0662321	-0.0617609	-0.0137465	-0.0155283	-0.0406143
CAB39	-0.0493133	-0.0406247	-0.0328251	-0.00902306	-0.0168162	-0.0134885	0.0820101	0.0583587	0.116359	0.0246933
CAB39L	-0.1461	-0.146772	-0.0177683	-0.0458702	-0.0525639	-0.017763	0.0331387	0.0106736	0.142013	0.0145956
CABIN1	-0.0114436	0.355207	0.00841197	0.0186928	0.0229678	-0.0537655	0.0179421	0.061232	-0.0396578	-0.00725611
CABLES1	-0.082351	0.101373	0.0757467	0.0520543	-0.00519376	-0.0528614	-0.033069	-0.0830223	-0.124935	0.0316782
CABLES2	-0.0571756	0.0539253	-0.105721	-0.0304821	0.0157066	-0.0502843	0.0550637	0.118874	0.070593	0.0131036
CABP1	-0.00758158	0.559864	-0.307482	0.0106486	0.00856038	-0.0432988	0.0740645	0.124424	-0.0109551	-0.0673158
CABP7	-0.0786839	0.375964	0.0169976	-0.0374654	-0.0703324	-0.095471	0.103207	0.0786251	0.0731877	-0.0862684
CABYR	0.0248615	0.234535	0.104516	-0.0088458	0.0746478	-0.0077562	0.0943197	0.111763	0.228319	0.0723883
CACFD1	-0.258002	0.0863393	0.029697	0.0243095	0.0181496	0.0204909	-0.107283	0.0307428	-0.135612	-0.0706807
CACHD1	0.0650937	-0.160535	0.294149	0.0788909	0.0504039	-0.124478	0.0814643	-0.0134882	0.0084847	0.164044
CACNA1A	0.0810292	0.50687	-0.0601581	-0.00103747	0.00456532	-0.0315539	0.00525075	0.0860179	-0.0439284	-0.0149691
CACNA1B	-0.0623282	-0.0223382	-0.0184109	-0.00063115	0.0315848	-0.0425537	0.0620877	0.188042	0.0255127	0.0419476
CACNA1C	0.146954	0.0918284	0.0328441	-0.0101674	0.0260219	-0.02565	0.0531914	0.144091	0.0734654	0.0779602
CACNA1D	-0.00212643	-0.0285691	-0.0587769	-0.0317462	0.00497381	-0.0309012	-0.0442043	0.0520699	-0.00689695	0.0310806
CACNA1E	0.125373	0.186886	0.0312807	0.000886879	0.0226267	-0.00112057	0.118962	0.143418	0.0982283	0.0363524
CACNA1F	-0.0299584	0.194895	0.0003815	-0.0327066	0.0217539	0.0366718	-0.0385026	-0.0498953	-0.0541501	-0.173228
CACNA1G	0.00629609	-0.296723	-0.0981185	-0.0953415	-0.0032212	-0.0344012	-0.0129856	0.0272143	-0.0634573	-0.0431874
CACNA1H	0.15643	-0.131886	0.195712	-0.157317	-0.157662	-0.0455654	0.00258732	0.15969	-0.173703	0.0162454
CACNA1I	0.146408	0.00711649	-0.0318683	0.0124865	0.0105815	-0.0261855	0.0691855	0.127093	-0.0275647	-0.0197562
CACNA1S	0.0202758	-0.0719602	-0.025883	-0.0580428	-0.0827425	-0.0159623	-0.113179	-0.172375	-0.180565	-0.160507
CACNA2D1	0.0213709	-0.0530219	-0.0378649	0.0091008	0.00771853	-0.0153911	0.169179	0.106757	0.210989	0.0801069
CACNA2D2	-0.0394783	0.147356	-0.145754	-0.0315029	0.00526636	-0.019857	-0.0392119	0.0458234	-0.0564223	-0.0763327
CACNA2D3	0.160577	-0.00277224	-0.13326	0.05547	0.0630189	-0.0105357	0.108429	0.159754	0.140905	0.0989758
CACNB1	0.0226036	0.327437	-0.144219	-0.0572532	-0.0430338	-0.0481056	0.0528756	0.0702885	0.0264014	-0.0948218
CACNB2	-0.172021	-0.0563479	0.0163921	0.0571515	0.0263434	-0.0304899	0.114274	0.117092	0.131838	0.0992226
CACNB3	-0.235616	0.170696	-0.0294351	-0.0303954	-0.00296823	-0.0343751	0.0861932	0.0380018	-0.05431	-0.0263668
CACNB4	-0.000226707	-0.0317442	-0.144196	-0.0042915	0.0165943	0.0896852	0.0704234	0.0691064	0.158373	0.0258115
CACNG2	0.0131193	0.381478	-0.17765	-0.0658098	-0.0271147	0.0106203	0.0462064	0.0526541	0.0884258	-0.0473381
CACNG3	0.0035215	0.261154	-0.0220679	0.00272977	0.0209088	-0.056738	0.159043	0.0830026	0.117596	-0.036221
CACNG4	-0.015021	-0.0943073	0.142777	-0.0597186	-0.042053	0.0229266	-0.122315	-0.067303	-0.160715	-0.105456
CACNG5	-0.0347327	0.0752061	0.0437094	0.038898	0.00609772	0.0154503	0.172224	0.147984	-0.0213711	0.159876
CACNG7	0.000179371	0.0636722	-0.133266	-0.00829736	0.0234335	0.0203919	0.10794	0.0458218	-0.00118294	-0.00995429
CACNG8	NA	NA	-0.0723198	-0.00831722	0.00488607	-0.0146608	0.0364576	0.0481197	0.0676189	-0.0990596
CACTIN	0.000577815	0.387075	0.0871941	0.0314375	0.0500866	0.015411	-0.0314302	0.0307853	-0.117716	-0.102729
CACUL1	-0.167591	-0.0545235	0.031436	0.00826693	0.00110491	-0.0108495	0.0407298	0.0498599	0.12857	0.0365813
CACYBP	-0.0407572	-0.0564376	0.0863168	0.0464809	-0.0115285	-0.00908717	0.121326	-0.00169501	0.176824	0.0397631
CAD	0.107546	0.194975	-0.022298	-0.000467641	0.0126464	0.0107829	-0.0758546	0.0338196	-0.111365	-0.0229019
CADM1	0.468974	0.0510185	0.144581	0.0555614	0.0128803	-0.0318376	0.0745566	0.0224512	0.108572	0.0237387
CADM2	-0.0299473	-0.156296	-0.071011	-0.0061493	0.0233731	-0.0123275	0.136974	0.0213503	0.147691	0.0196859
CADM3	0.00428633	0.604001	0.00482584	0.0106973	0.0354894	-0.00553388	0.176869	0.147822	0.14563	0.00707523
CADM4	0.017855	0.404793	-0.0681372	-0.0305641	-0.00227847	-0.0612479	0.0244173	-0.0859737	-0.112856	-0.0769476
CADPS	0.0851661	0.00669964	-0.139205	-0.000655367	0.0123659	-0.0603205	0.0558992	0.0920227	0.141745	-0.019301
CADPS2	0.105744	0.11067	-0.255843	-0.00530186	0.0285543	0.0553139	0.145719	0.0482181	0.140188	0.0999323
CALB1	-0.0231789	-0.0215786	0.0549901	0.180646	0.0570867	0.0136801	0.0764662	0.0420466	-0.078186	0.00427407
CALB2	0.10674	-0.431492	0.136273	0.0674591	0.11907	-0.0054919	0.169916	0.068218	0.0542759	-0.0394412
CALCOCO1	-0.0279343	0.447309	-0.037867	0.014345	0.0163841	0.0105557	-0.0451778	0.0471671	-0.0439286	-0.00304244
CALCOCO2	-0.30674	0.0280044	0.0403051	0.0526616	0.00927493	0.00139974	0.0248445	0.0185566	0.0847967	0.191192
CALCRL	0.432964	-0.106816	0.118731	-0.0362294	-0.0582826	-0.0695433	0.0131489	-0.171916	0.0608375	0.107216
CALD1	0.419967	-0.143911	0.0820299	0.0111076	-0.0543119	0.0121146	-0.0806889	-0.0954646	0.0199465	0.389767
CALHM2	0.0216397	0.122071	-0.0419695	-0.0435355	-0.0590298	-0.0456875	-0.0870777	-0.152225	-0.129386	-0.207541
CALM1	-0.269856	-0.0490271	-0.0282298	-0.0184888	0.00315744	0.00526344	0.151922	0.0493071	0.148906	0.033762
CALM2	0.0130041	-0.104607	-0.146864	-0.0354349	0.00119074	0.0165916	0.0863382	-0.00127985	0.160381	0.0281704
CALM3	0.0872493	0.304763	-0.0947844	0.0134057	0.0372767	0.00132987	0.186373	0.114268	0.103276	-0.0115168
CALML4	-0.0633737	0.206786	-0.0236342	0.0606957	0.108686	0.0204981	-0.215851	-0.0741094	-0.102471	-0.106089
CALML6	-0.00119225	-0.0763539	-0.0173934	-0.196298	-0.0446545	-0.0258807	-0.206724	0.26587	-0.19416	-0.0471953
CALN1	0.0287963	0.188215	0.136808	-0.00661265	0.0246445	0.0456707	0.0775079	0.166837	0.156931	0.0454869
CALR	0.342126	0.20567	0.147426	0.0410824	0.00572958	-0.0357411	0.117047	-0.00495929	0.0747661	0.0160644
CALU	0.50837	-0.176057	0.0545741	-0.0155255	-0.0105628	-0.0501954	0.0338125	-0.017033	0.0710568	0.0767762
CALY	0.0708824	0.541287	-0.111107	0.0579386	0.0852927	0.0219312	0.271548	0.225364	0.0738134	0.0327983
CAMK1	-0.00498152	0.457688	0.0125936	-0.00448122	-0.0184148	-0.023277	0.100247	0.0134388	-0.0859137	-0.1441
CAMK1D	-0.392872	0.0337467	-0.0864343	-0.0340587	-0.00394501	-0.0190388	0.154491	0.0579858	0.113201	0.0295893
CAMK1G	0.73639	0.711647	-0.165968	0.070579	0.0770206	-0.0896032	0.165945	0.154023	0.146454	0.0210243
CAMK2A	-0.0306941	0.12803	-0.0798646	0.00823728	0.0347899	-0.0420144	0.160769	0.0595636	0.00964172	0.0120239
CAMK2B	0.00300839	0.520715	-0.0979072	-0.0299832	-0.0178528	-0.0370452	0.0915025	0.094111	-0.0104522	-0.0666014
CAMK2D	-0.0706337	0.270888	0.0749156	0.00391038	0.031373	0.031454	0.167366	0.12845	0.231674	0.0326586
CAMK2G	-0.291883	-0.0706822	-0.119178	-0.0444575	0.00174574	-0.000973684	0.0283813	0.00326682	-0.00860037	-0.0105576
CAMK2N1	-0.612676	0.0633546	-0.0164641	-0.0243389	-0.0145654	-0.00343688	0.119846	-0.0256298	-0.00603825	-0.0573048
CAMK2N2	0.0706232	0.348815	-0.0408241	0.0209508	0.0193839	-0.000181854	0.259965	0.0650062	-0.042224	-0.0267909
CAMK4	0.0231819	0.0139075	-0.205325	-0.0363701	0.0106962	0.0132289	0.108632	0.0265838	0.0874198	-0.0601219
CAMKK1	0.0570559	0.275749	-0.136038	0.0247111	0.0666393	-0.00145508	0.222804	0.112027	0.06117	0.0394548
CAMKK2	-0.0106636	0.32937	-0.130913	-0.010955	0.00694057	0.0420674	0.1123	0.0318794	0.0076001	-0.0108052
CAMKMT	-0.130613	-0.278354	0.0397962	0.00793907	0.0122522	0.00326627	-0.0831282	-0.023787	-0.0430664	-0.0994216
CAMKV	0.0267733	0.218505	0.00808267	0.0474925	0.0734184	-0.00371633	0.184297	0.159713	0.0427334	-0.0147875
CAMLG	0.00425517	-0.049539	0.0220449	0.032937	0.0423283	0.0529203	0.130126	0.0196275	0.0756872	0.0327145
CAMSAP1	0.121352	-0.0857699	0.0351125	-0.00481371	0.0121822	-0.0654127	0.0360402	0.0687636	0.0538154	0.00853167
CAMSAP2	0.151218	-0.0507712	-0.0409541	0.00192972	0.0119229	-0.0196583	0.101916	0.0542325	0.206849	0.0870218
CAMSAP3	-0.15159	0.290762	-6.19e-05	-0.00177936	0.0125145	-0.0603033	0.0700321	0.123745	-0.0526715	-0.091545
CAMTA1	0.00934416	0.145595	-0.15127	-0.0148989	0.0160362	-0.00843575	0.100298	0.0370728	0.0859385	0.00238457
CAMTA2	0.0211004	0.205104	-0.108394	0.0014017	0.014018	-0.00412166	0.110288	0.0772351	0.0268804	-0.00749113
CAND1	-0.0297917	-0.261808	-0.0658029	-0.0195152	-0.00665616	0.000715678	0.0437765	0.0232458	0.143828	0.0369454
CAND2	-0.052895	-0.0658868	-0.109308	-0.00873773	0.0321452	0.0226083	0.0314129	0.0681679	-0.0458473	-0.0164353
CANT1	-0.0555393	0.249227	0.0507751	-0.0190268	0.0100843	-0.0238819	0.0609426	0.0994527	0.0606438	-0.0128174
CANX	0.254216	0.0144182	0.0559093	0.00426979	-0.00758439	-0.0173403	0.0760129	-0.0457073	0.104295	0.0462423
CAP1	0.12639	0.0443155	0.0661939	-0.000796453	-0.0154782	-0.0302816	0.0494068	0.00886648	0.0819961	0.00245089
CAP2	0.231124	-0.165703	-0.124915	0.0132839	0.0207449	-0.0365694	0.169545	0.105076	0.213688	0.0177137
CAPG	0.133675	0.0517854	0.303291	0.0964379	0.0707706	-0.0660643	-0.065395	-0.306616	-0.2047	-0.083211
CAPN1	-0.127355	-0.00408925	-0.0571677	0.0103569	0.0297747	-0.0363919	0.0658705	0.0614228	-0.0174131	0.00115984
CAPN10	-0.100061	0.136391	0.0910278	0.016092	0.0158524	0.00688694	-0.131929	0.0565201	-0.191992	-0.0862269
CAPN13	-0.752329	0.0593864	-0.388494	-0.08054	-0.094695	0.036433	-0.335673	-0.238666	-0.0887369	-0.146922
CAPN14	0.073328	-0.0232491	-0.102661	0.0130849	-0.015782	0.0101242	-0.0935206	0.094463	-0.0772575	-0.096219
CAPN15	-0.0714568	0.176669	0.0727242	-0.0352833	-0.00974833	-0.0196242	-0.0518004	0.0998192	-0.159906	-0.100798
CAPN2	-0.299399	-0.0479063	0.096729	0.0697909	0.0079508	-0.0223173	-0.0380762	0.0016569	-0.0477519	0.050277
CAPN5	NA	0.268643	0.0922805	0.0789498	0.100664	-0.0265593	0.190069	0.172731	0.148972	0.0765817
CAPN7	-0.0196204	-0.177556	0.0249184	0.00407327	-0.00774569	-0.0121774	-0.0107705	-0.0465293	0.0531213	0.062592
CAPN9	-0.189318	-0.000620017	-0.155289	-0.103584	-0.125891	0.0569604	-0.0999841	0.0801941	0.151519	0.247959
CAPNS1	-0.176203	0.414816	-0.0571068	0.0166675	0.0138351	-0.0421639	0.17395	0.0575041	0.0613473	-0.0295988
CAPRIN1	0.0725363	-0.132331	0.0415803	0.00437116	0.00359379	-0.0010816	0.0946416	0.0061226	0.0930843	0.0245683
CAPRIN2	-7.81e-05	0.0708286	-0.00690801	-0.0212483	-0.0142392	-0.0341962	-0.091266	0.0532253	0.018001	0.0245343
CAPS	-0.128941	-0.162859	-0.0224259	-0.0223307	-0.0187772	-0.0401187	-0.193074	-0.0653987	-0.155028	-0.0528049
CAPS2	0.000710069	-0.0694792	-0.14855	-0.0178841	0.0129939	-0.0393929	-0.166364	-0.041813	-0.00810537	0.00235974
CAPZA1	NA	NA	0.060475	-0.0143723	-0.000525724	0.0127504	0.0224327	0.00786282	0.110671	0.0501652
CAPZA2	-0.0172252	-0.153511	-0.0427247	-0.031964	-0.0200684	-0.00541553	0.0348757	-0.0743801	0.121817	0.00907575
CAPZB	-0.0855038	0.00493739	0.00842105	-0.0141995	0.00319629	0.0220272	0.0453616	0.0111274	0.0256802	-0.0242339
CARD10	-0.017558	0.0250586	-0.0892628	-0.054146	-0.0407314	-0.0137723	-0.295375	-0.177576	-0.29951	-0.0830702
CARD11	0.408227	-0.0961418	-0.0412976	-0.156513	-0.100459	0.00364002	-0.293058	-0.136723	-0.172706	-0.346935
CARD14	0.0281347	0.0740213	0.243226	-0.0919402	-0.0746939	0.00807565	-0.190652	0.2302	-0.0862849	-0.0747727
CARD6	0.131173	0.0254371	0.0581143	-0.0642404	-0.116194	-0.0483706	-0.14816	-0.250348	-0.0647361	0.177891
CARD8	0.325877	-0.225612	0.0706766	-0.0268972	-0.0839923	-0.0269573	-0.26282	-0.27104	-0.197026	-0.0848014
CARD9	0.136895	0.107311	0.134005	-0.0489046	-0.11781	-0.0929458	-0.524902	-0.13133	-0.401711	-0.124376
CARF	-0.0168534	-0.0333586	-0.0893989	-0.039915	0.0100957	0.00445631	-0.120731	-0.128932	0.0150684	-0.0303028
CARHSP1	0.168851	-0.196714	0.162834	0.0378494	0.0258864	-0.00291717	-0.0612845	-0.0240174	-0.15486	-0.00419985
CARM1	NA	0.171098	-0.00764922	0.0228174	0.0393479	-0.0241641	0.104096	0.119833	-0.00454867	0.029736
CARNS1	0.00641707	0.483139	-0.514794	-0.128007	-0.119913	0.0157097	-0.434574	-0.0502369	-0.243563	-0.219834
CARS	0.0716875	0.0135926	-0.0300076	-0.0146532	-0.00278744	-0.0550886	-0.0338206	0.0197321	0.0203299	-0.0181363
CARS2	-0.125604	0.0344989	0.117984	0.0170028	-1.52e-05	-0.00741767	-0.0329977	0.0468327	-0.0542036	0.0466718
CARTPT	-0.00855069	0.21501	0.0366703	0.430123	0.482942	0.189501	0.777767	0.367795	0.149408	0.34016
CASC1	0.0139615	0.212862	-0.0747247	0.0509605	0.0328679	0.00287287	0.0573075	-0.0553885	0.182174	0.060116
CASC10	0.036434	0.0182011	0.149268	0.0116526	-0.0503481	0.0642698	0.00918957	-0.0559675	-0.0919583	0.00265663
CASC3	-0.000420029	0.127147	0.0485803	-0.00182717	-0.0118003	-0.0100055	-0.010936	-0.0562482	-0.0335509	0.0572771
CASC4	0.0610875	-0.462125	0.020971	-0.00351566	0.00440224	0.0246938	0.0349167	-0.0486648	0.0539323	0.0574844
CASD1	-0.0948038	-0.159801	-0.065117	-0.0475701	0.00136925	-0.0104495	0.0285395	0.0376121	0.149379	-0.0169626
CASK	-0.113421	-0.233497	0.0849588	0.0116235	0.00209505	-0.0224562	0.0558775	-0.00681663	0.120618	0.0193006
CASKIN1	0.00837239	0.188978	-0.0963654	-0.0485962	-0.0255844	-0.04565	0.0496171	0.0390513	-0.11951	-0.0872991
CASKIN2	-0.0583342	0.0369186	0.0232717	0.00574246	-0.0118146	-0.00447584	-0.0368723	-0.0536069	-0.15379	-0.0321916
CASP1	0.708377	0.132009	0.299793	0.0397825	-0.0742922	-0.0047056	-0.184926	-0.270499	-0.0203495	0.0501961
CASP10	0.165371	0.0939299	-0.0643451	-0.139324	-0.181085	0.0518192	-0.324277	-0.138901	-0.238086	-0.0248383
CASP2	-0.103336	-0.231204	-0.0274456	0.0302628	-0.00402048	-0.0382458	-0.109138	-0.0208183	-0.0696248	-0.0153376
CASP3	0.0313639	0.0564665	-0.0278724	-0.00964988	-0.0124271	-0.0197358	-0.0661974	-0.150753	-0.0272881	-0.0718601
CASP6	-0.396235	-0.0307472	0.190052	0.0459642	-0.000638033	0.0183539	-0.152195	-0.017401	0.00422517	-0.190676
CASP7	-0.212264	-0.0607668	0.309854	0.175612	0.0133177	0.0082709	-0.0120748	-0.130201	-0.0718857	0.0135229
CASP8	0.0988562	-0.00714384	0.00914616	-0.0148132	-0.0253617	0.0780106	-0.138174	-0.0737323	-0.00881575	-0.0997013
CASP8AP2	NA	NA	-0.0041848	-0.0115035	-0.00442111	-0.0609277	-0.146889	-0.101168	0.129704	0.0456301
CASP9	0.0300801	0.204153	-0.00724831	-0.0134887	-0.0221811	0.0041939	-0.112973	-0.0172642	-0.101411	-0.0438352
CASQ1	0.00770998	0.227451	0.0233899	0.0903419	0.0562871	-0.0275934	0.170925	0.11997	0.162625	0.134179
CASQ2	0.0503024	-0.242484	-0.362632	-0.220181	-0.14506	0.0663013	-0.313675	-0.326316	-0.14346	0.398373
CASS4	NA	NA	0.107013	-0.0541051	-0.0969814	0.0693713	-0.54077	-0.547461	-0.318663	-0.184476
CAST	-0.0157281	-0.146049	0.0104044	-0.0316299	-0.0223548	0.0344817	-0.0527895	-0.0495857	0.0193262	0.0598665
CAT	-0.413389	-0.358154	0.0781553	-0.0083849	-0.0143549	-0.0380006	0.00166586	-0.104399	-0.0961955	0.0199767
CATSPER2	-0.0535151	-0.325128	-0.0347751	-0.0493796	0.0578953	-0.0840215	-0.100963	0.0765802	0.000272353	0.0564428
CATSPERG	0.0149121	0.0138309	0.0956891	0.0352941	0.086861	0.0497217	-0.204055	0.0542145	-0.138823	0.0553845
CAV1	0.383664	-0.215806	0.138915	-0.0266175	-0.0777012	-0.073562	-0.121439	-0.266165	-0.0650513	0.137955
CAV2	0.163807	-0.138896	0.0912004	0.0907043	0.0514995	-0.0284224	0.129743	-0.0218582	0.0337738	0.212939
CBFA2T2	-0.173973	0.0830458	0.0480505	0.00406549	0.00346983	-0.0215604	0.0111554	0.0492005	0.0219166	0.0153833
CBFA2T3	0.0602362	0.0181406	0.122686	-0.000160209	-0.0340163	-0.0113596	0.0167295	0.0999609	-0.0688206	-0.0718089
CBFB	0.302267	-0.0166781	0.248678	0.0780513	0.0136008	-0.0291342	0.0187876	0.0206994	0.110873	0.105523
CBL	0.126734	-0.00169455	0.103937	-0.00764021	-0.011845	NA	0.011315	-0.0273635	0.0313219	0.0363365
CBLB	0.0890809	0.0334277	-0.0093578	0.0379052	0.027817	-0.0271033	-0.0951037	-0.037642	-0.0508815	0.0504071
CBLL1	0.0292439	-0.0132129	0.00523762	0.0289088	0.0205905	0.0706283	0.0882811	0.00106683	0.135903	0.0753232
CBLN1	-0.0286462	0.138712	0.00922558	0.0350056	0.0739421	0.0290089	0.0322648	0.0705499	0.120758	0.151879
CBLN2	0.0872217	0.41356	-0.140405	0.0187532	0.031201	-0.0146689	0.166057	0.126682	0.16042	0.0582814
CBLN3	0.277899	-0.11716	0.0845646	0.0163568	0.0130562	0.0321505	-0.477367	-0.0452313	-0.330698	0.119862
CBLN4	-0.0584594	-0.195316	-0.199883	0.0196524	0.0387532	-0.0349968	0.152082	0.0716509	0.0149903	-0.0281571
CBR1	-0.154706	-0.134774	-0.0229323	-0.0142988	-0.0319167	-0.0222007	-0.00607742	-0.0797677	-0.106561	-0.0146666
CBR3	0.459625	0.130354	0.140322	0.0123402	-0.0615832	-0.0301041	0.161579	-0.0329905	-0.190455	-0.203402
CBR4	-0.287521	-0.140803	-0.0314663	-0.00116279	-0.00782679	0.054711	-0.0742339	-0.0724803	0.073739	0.0621548
CBS	-0.445627	-0.0648084	-0.0114578	0.0523349	0.0437758	-0.0356478	-0.294363	-0.103241	-0.171756	0.00239192
CBWD1	0.0130567	0.0883925	-0.00213859	-0.035541	-0.0536973	0.0310544	0.0256939	-0.0110096	0.113681	0.0639101
CBWD2	NA	-0.0129397	-0.0501466	-0.0239313	-0.0391911	NA	0.00745458	0.0360514	0.124702	0.0143962
CBWD5	NA	-0.181799	-0.0879088	0.00222932	0.0831724	NA	0.0783679	0.248773	0.178968	0.140589
CBWD6	NA	0.148384	0.00920363	0.0134146	0.0407931	NA	-0.0395641	0.115627	0.0632744	0.133806
CBX1	-0.030496	0.056914	0.0446979	0.0179325	0.00272344	0.0237479	0.0960279	-0.00611533	0.0973075	0.0679689
CBX3	0.107575	0.208646	-0.0406839	-0.0136177	0.00429108	0.0107232	0.00785577	-0.0637527	0.0805295	0.0420907
CBX4	0.345159	0.349457	-0.017912	0.0302783	0.0462359	0.032306	0.138831	0.0779885	0.00456617	-0.0161986
CBX5	0.0323782	0.0496109	-0.0244942	0.00860572	0.0124372	0.00490997	0.0350657	-0.047371	0.0836543	0.0100855
CBX6	0.116619	-0.216809	-0.0264846	-0.0392798	-0.0271756	-0.0409437	0.0827959	0.0399441	-0.033398	-0.0311485
CBX7	0.0644673	0.315389	-0.0889678	-0.00584964	0.0260936	0.0193364	0.0785525	0.0288211	-0.0172939	0.0167596
CBX8	-0.0513403	-0.11956	-0.10647	-0.036856	-0.0469644	0.00700268	0.0381254	-0.0437112	-0.0523101	-0.114261
CBY1	-0.116663	0.050341	-0.0171413	0.0147339	-0.0264414	-0.0282886	-0.0978376	-0.0534079	-0.123439	0.00538208
CBY3	-0.0134067	0.0455505	0.193742	-0.0080952	-0.111469	NA	-0.288691	NA	-0.204079	-0.155031
CC2D1A	-0.210655	0.214674	0.0279812	0.048253	0.0430113	-0.0162261	-0.0328757	0.105249	-0.073668	-0.0338288
CC2D1B	-0.0702468	-0.0685187	-0.0348006	-0.0397548	-0.0276667	-0.0157575	-0.161564	-0.0415965	-0.163886	-0.0988455
CC2D2A	-0.0404237	-0.235545	0.0056429	-0.0341937	-0.0285704	-0.0710286	-0.107877	-0.0317058	-0.0626447	0.0882795
CCAR1	0.0803149	-0.12883	0.0135417	-0.017441	-0.0310477	-0.0139889	-0.0628506	-0.0571502	0.0541237	0.093937
CCAR2	-0.00754438	0.208218	-0.0104066	0.00447923	0.0135308	-0.0191114	0.0490208	0.0520478	-0.000574902	0.00814788
CCBE1	-0.106242	-0.339185	0.484495	0.0829616	-0.0178477	0.0319681	0.0955477	0.245052	0.339371	0.277023
CCDC102A	0.389701	-0.0831702	0.252239	0.0661256	-0.125997	0.0219276	-0.0597014	-0.140025	-0.20076	0.174503
CCDC102B	0.0732617	-0.0804567	-0.0572075	0.0229777	0.0508446	0.0308398	-0.0572222	-0.0224374	0.03356	0.128545
CCDC106	0.053428	-0.330421	-0.0307901	0.0134683	0.0229922	-0.0476786	0.0775715	0.0172635	-0.0792241	-0.0624395
CCDC107	-0.0364234	0.138272	0.0495386	0.020882	0.0337801	-0.0418868	0.0972694	0.0169042	-0.0460992	0.0268625
CCDC110	0.000176586	-0.0257363	-0.0101063	0.0163782	-0.0437351	-0.0875161	-0.0106648	-0.041122	0.0571746	0.0283613
CCDC112	-0.295591	-0.131144	-0.0396303	-0.00345851	0.000140197	0.00123363	-0.0331679	-0.0797254	0.145399	-0.00970215
CCDC113	-0.0351065	-0.0441993	-0.101628	0.0100371	0.0488168	0.0278842	0.0717194	0.0477329	0.137125	0.0550195
CCDC114	0.0127276	0.0409123	0.250172	0.0337498	0.123292	-0.00113292	-0.113273	0.229579	0.0783523	0.0405579
CCDC115	-0.325166	0.0837252	-0.0659664	-0.00726143	0.00999786	-0.0141053	0.0630584	-0.0292028	-0.0123719	-0.0478092
CCDC117	0.139921	-0.141393	0.109839	0.0445062	-0.0148998	-0.0331712	-0.0224014	-0.0227779	0.0263707	-0.0223546
CCDC12	-0.095396	-0.0475184	-0.0284721	0.00907239	-0.00334775	-0.0176187	0.0581047	-0.0175554	-0.0109037	-0.0321655
CCDC120	0.0362406	0.19114	0.10294	0.056514	0.0159128	-0.0336024	-0.000260227	0.0980886	-0.0676232	0.0172692
CCDC121	-0.139743	-0.195295	0.112205	-0.00849169	-0.0386066	-0.0450918	-0.0140844	-0.13698	-0.0315983	-0.00450527
CCDC122	-0.0263819	-0.0565953	-0.270355	-0.075042	0.0980381	NA	-0.0157675	0.068086	0.0929939	0.218141
CCDC124	0.0371529	0.31728	0.0362408	0.000989886	-0.0147391	-0.0355408	0.135236	0.0716091	0.0021076	-0.079216
CCDC125	-0.0215455	0.0145305	-0.0342684	-0.0497435	-0.0880755	-0.0555778	-0.160164	-0.115034	-0.0261833	-0.0140349
CCDC126	-0.0103022	-0.13948	0.052656	0.013312	0.0270053	0.00197785	0.159047	0.00547384	0.108323	0.126201
CCDC127	0.0502247	0.0524055	-0.0625002	-0.0400914	-0.0802137	-0.0296118	-0.0854651	-0.115435	-0.119127	-0.146348
CCDC13	0.0095084	0.00973107	-0.0131731	0.0289064	0.0442399	0.0877264	-0.0884288	0.0451115	-0.165489	0.0174878
CCDC130	-0.0274792	-0.0927279	0.00134936	0.0069302	0.0272622	0.00724626	-0.148862	0.022032	-0.0940855	-0.0640608
CCDC134	0.0760252	0.0193228	-0.120687	-0.0496281	-0.0455107	-0.0236951	-0.124992	-0.10325	-0.0833854	0.0694854
CCDC136	0.106812	-0.077087	-0.14294	-0.0209866	0.0123761	0.00795728	-0.0319464	0.0643276	-0.0231653	-0.0411347
CCDC137	-0.0525832	0.10726	0.0294069	-0.00175849	0.0236535	-0.0370102	0.0203542	0.0366521	-0.0504582	-0.0547812
CCDC138	0.00776403	-0.0334566	0.00313059	-0.00858859	0.0119854	0.0112463	-0.063809	-0.0227843	0.0679631	0.0529397
CCDC14	-0.136635	-0.144825	-0.039566	-0.00517609	-0.00782681	-0.0192497	-0.113851	0.0138667	0.0297971	-0.0174233
CCDC142	-0.0742628	-0.0806473	0.0401715	-0.024717	-0.0416364	-0.0600766	-0.254909	-0.0395176	-0.181286	-0.100526
CCDC144A	0.0838414	0.057614	-0.0147553	-0.0363421	0.099529	-0.0430884	0.132411	0.251901	0.242308	0.226912
CCDC144NL	-0.0240131	0.0817502	-0.0263795	0.0297631	0.145067	NA	0.133625	0.230652	0.0471803	0.164865
CCDC146	-0.164173	0.0231229	0.0285833	-0.0201048	-0.0227199	0.0075355	-0.0741494	-0.0100774	0.0999061	0.155102
CCDC148	0.0205223	-0.069883	0.0639989	-0.00675179	0.0164935	0.0146962	0.0374932	-0.0393038	0.23822	0.100832
CCDC149	-0.0199406	-0.0867327	0.00281613	0.00527628	-0.000582449	0.00969367	0.0372038	0.0699856	0.104282	0.0495842
CCDC15	-0.077582	0.192373	0.0401119	0.0452875	-0.00383673	0.0318712	-0.0684152	-0.170524	0.0989549	0.158369
CCDC151	0.00490745	-0.0156198	0.165619	0.0165866	-0.0510089	-0.0183556	-0.177041	0.0577221	-0.101723	-0.0353739
CCDC152	NA	NA	-0.0598964	-0.00898579	-0.0182769	0.0519404	0.1032	-0.0227441	0.0549766	-0.0286257
CCDC154	NA	0.206697	0.231409	-0.0459623	0.0613761	-0.103806	-0.626514	-0.0119511	-0.518065	-0.38942
CCDC157	NA	0.0487809	-0.0332035	-0.0351755	-0.0187675	0.0129228	-0.0373073	0.07682	-0.12438	-0.107417
CCDC158	-0.0478792	0.0338282	0.0184324	0.0211624	-0.00297169	0.0145246	-0.0733516	-0.042761	0.0793972	0.0742566
CCDC159	0.0014208	0.0477741	-0.0217051	-0.0449236	0.0111888	-0.0401407	-0.294712	0.00947825	-0.130701	-0.166584
CCDC167	0.378101	-0.0114019	0.0251427	-0.0426479	-0.00250807	-0.029809	0.00461448	0.0336071	-0.0187027	-0.0518032
CCDC17	-0.146479	0.0277907	-0.0248301	0.0683832	0.063685	0.0493395	-0.362687	0.0387838	-0.110209	0.0335102
CCDC170	0.0213656	0.0155623	-0.0246842	0.0226023	0.0291114	0.0601325	0.0454427	0.0508696	0.164989	0.132587
CCDC171	-0.0252666	-0.0112601	0.039456	0.0145934	0.0230445	-0.0156387	-0.0322664	0.0928366	0.0527736	0.0792544
CCDC173	0.0406744	0.00159424	-0.0117363	0.0588081	0.0188547	-0.0301543	-0.0131274	-0.0829119	0.146906	0.0398149
CCDC174	-0.0223908	-0.00421892	0.000642036	0.0202251	0.017529	-0.00235033	-0.051072	-0.042518	0.0161152	-0.0220134
CCDC175	NA	0.0200148	0.0524002	0.0840744	0.0597235	NA	-0.147903	-0.00729053	0.0323462	0.372604
CCDC177	0.00169543	-0.0445601	-0.0855955	-0.0228293	-0.000206083	-0.0494813	0.0610975	0.0819788	-0.0102805	-0.0270612
CCDC18	-0.030959	0.0101066	0.191821	-0.0112491	0.0154155	-0.00243473	-0.220312	-0.128898	0.0679768	0.142125
CCDC181	0.0014415	0.000823334	-0.00843564	0.0709557	0.0520557	0.0557034	0.0204136	0.0244531	0.232089	-0.00621232
CCDC22	-0.0102468	0.0430002	-0.0202984	-0.0313063	0.000551283	-0.0588094	-0.0373355	-0.0216225	-0.148223	-0.0446969
CCDC24	-0.0673566	0.0940323	0.0462353	0.00173916	0.00508489	-0.0532843	-0.0870514	0.0373089	-0.155205	-0.127123
CCDC25	-0.0632674	-0.0643564	-0.148683	-0.0215448	-0.0102277	-0.00372103	0.018104	0.00627027	0.0797829	0.0272325
CCDC28A	-0.189501	-0.146584	0.0198319	0.0498946	0.0625659	-0.0153342	0.152644	0.068756	0.173933	0.0580582
CCDC28B	0.162776	-0.100506	0.0324424	-0.0229745	-0.0270322	-0.0239574	-0.0753125	-0.0252619	-0.105513	-0.0328375
CCDC3	0.435419	0.521494	0.0941221	0.0501917	0.0294397	-0.0274484	0.154608	0.0994597	0.127707	0.0870103
CCDC30	-0.0281753	-0.020021	-0.056751	-0.00184073	0.0099349	-0.00668713	-0.106104	-0.0676655	-0.0324115	0.0361356
CCDC34	-0.364778	0.0182312	-0.105991	-0.0220519	-0.0301412	-0.0120888	0.0724021	0.0371654	0.152405	0.0500445
CCDC36	-0.0131511	-0.0094504	0.167021	-0.044688	0.0316175	0.0536722	-0.258169	-0.169146	-0.0097055	0.0441713
CCDC39	NA	NA	-0.165983	-0.0155302	-0.0087866	0.0521554	-0.0473038	0.00442271	0.0298761	0.0577585
CCDC40	-0.0325499	-0.0436244	0.0909473	0.0528834	-0.00430923	0.00676877	-0.119254	0.0602356	-0.100228	-0.078285
CCDC43	-0.045931	-0.0809537	-0.0638565	-0.00991143	-0.00646744	0.0133332	0.0487963	-0.00795454	0.128826	0.00694715
CCDC47	-0.115156	-0.0906263	-0.0286322	0.0270155	0.0077215	-0.000742723	0.102801	-0.0279265	0.105789	0.0607977
CCDC50	0.160315	-0.0991958	0.00677188	-0.0257406	-0.0290691	-0.0281353	-0.118079	-0.153439	-0.0248323	0.00971216
CCDC51	-0.120833	0.0255718	-0.0998503	0.00894694	-0.00893728	-0.0306106	0.0360763	-0.044808	-0.0495253	-0.0502974
CCDC57	-0.0409909	0.0509129	-0.0770442	-0.053353	-0.000783933	-0.0317178	-0.192091	0.0742322	-0.18641	-0.0657946
CCDC58	NA	-0.292447	-0.0291629	0.00572846	-0.00948867	0.0148475	-0.0448732	-0.0346701	0.0341282	-0.0262564
CCDC59	0.080635	-3.15e-05	-0.00439623	0.0215096	0.0198488	-0.017325	0.0613098	-0.0685269	0.1347	0.0329213
CCDC6	-0.0575895	0.153301	0.070849	0.0273031	0.0157639	0.00316696	0.156732	0.0996426	0.166367	0.040329
CCDC61	-0.0597625	0.135798	-0.124207	-0.0300044	0.0097856	-0.00519808	-0.110682	0.140354	-0.127171	-0.0890121
CCDC62	0.0370343	-0.110112	0.118223	0.0199222	0.0524264	-0.0502063	-0.0314208	0.0677012	0.042433	0.106286
CCDC65	-0.00643062	0.0158419	-0.0774961	0.00688719	0.0058238	-0.00052306	0.0533328	0.0729343	0.095201	-0.00626711
CCDC66	-0.141395	-0.149462	-0.0350404	0.00333604	0.00794729	0.0218816	-0.100829	-0.0428929	0.0277044	0.0591271
CCDC68	-0.154265	-0.0138874	-0.0212165	0.00278487	-0.0398016	-0.0561348	-0.0831482	-0.102904	0.135694	-0.0948412
CCDC69	0.0195194	0.133489	0.145286	0.0163304	-0.0203128	-0.0381059	-0.045037	-0.0122654	0.0038759	0.00667349
CCDC7	-0.0443007	0.0102648	-0.0557501	-0.0799543	-0.0265674	-0.0106202	-0.15191	-0.201785	-0.0186476	0.0516462
CCDC71	0.0206421	-0.0376595	-0.0736092	-0.0232431	0.0382417	NA	0.0684168	0.0263606	-0.0432191	0.0203965
CCDC71L	0.107067	-0.00197449	0.145187	0.0629502	0.0682936	0.0109279	0.127386	0.129608	0.221115	0.197296
CCDC74A	NA	2.06e-05	-0.00436979	0.0537007	0.0876382	NA	0.0605378	0.0920284	-0.0646135	0.0745272
CCDC74B	0.00475742	0.0672291	0.135557	0.0212904	-0.0100278	0.00868925	0.194312	0.193675	0.00204578	0.0903448
CCDC77	-0.0286181	0.0134847	0.0705505	0.0400278	0.00632204	-0.0662624	-0.0312327	0.0717909	0.0464865	0.037247
CCDC78	0.00759893	-0.00335096	0.123341	-0.0935529	0.0100726	-0.0393232	-0.246705	0.189723	-0.306924	-0.0828544
CCDC8	0.0164767	-0.0578487	0.305034	0.100343	0.0829091	-0.0186193	-0.0807653	-0.152774	-0.157361	0.19188
CCDC80	0.0242156	-0.0762505	0.126457	0.0190667	-0.0498242	-0.0172533	-0.0923325	-0.183974	-0.0384344	0.237012
CCDC81	0.0570603	0.0836167	0.23723	0.0662683	-0.0258136	0.00101814	0.0108756	0.05024	-0.0531809	0.263466
CCDC82	-0.0162775	-0.0351713	-0.0310321	-0.0308889	0.00343695	-0.021069	-0.0711211	-0.0548805	0.1401	0.128833
CCDC84	-0.0314484	0.106752	-0.0627441	-0.0223297	0.040617	-0.0102171	-0.125609	0.00614565	-0.048166	-0.0245879
CCDC85A	NA	NA	-0.0205237	0.0455069	0.0265526	-0.0171028	0.0968989	0.0474498	-0.0188296	-0.0640085
CCDC85B	0.0682515	0.195572	0.0374363	0.0179962	-0.0107123	-0.0468285	0.0605246	0.00739831	-0.176372	-0.0792743
CCDC85C	-0.267823	-0.0944999	0.163219	0.04868	0.00338201	0.0024183	-0.0018071	0.0406352	-0.121592	0.0180368
CCDC86	0.0358019	0.484237	0.0884727	0.0389621	0.0341599	0.00416936	0.0269623	0.0546056	-0.0292642	-0.0956625
CCDC87	-0.0105429	-0.0418256	-0.011378	-0.0883198	-0.00808845	0.065406	-0.155856	-0.0600505	-0.108587	-0.0407378
CCDC88A	-0.041428	-0.203781	-0.0576331	-0.0398722	-0.0210731	-0.0170618	-0.14455	-0.0776743	0.0511475	-0.00887625
CCDC88B	0.2558	-0.00985494	0.168853	0.0120024	-0.00342116	-0.00533249	-0.217504	0.0197602	-0.20102	-0.0309248
CCDC88C	NA	NA	0.0300285	-0.00541695	0.048057	-0.00112537	-0.0978205	-0.146934	-0.53251	-0.0686301
CCDC89	0.0200106	-0.0446603	-0.0477638	-0.0851414	-0.0569685	0.0118465	-0.169576	-0.184975	-0.253746	-0.270292
CCDC9	0.0435858	0.00644576	0.0788021	0.0679879	-0.00697568	0.0220297	-0.0583935	0.00947361	-0.102582	0.00825157
CCDC90B	0.0175921	-0.351927	0.0396736	-0.026492	-0.012106	-0.00577749	-0.00477123	-0.0392214	0.0842046	0.035672
CCDC91	0.0681378	-0.378648	-0.0566051	-0.00920956	-0.00632022	-0.00374079	-0.0279444	-0.0843507	0.0667911	0.0366213
CCDC92	0.0452566	-0.0694362	0.0269203	0.0379087	0.0289884	0.00424114	0.123519	0.117822	0.0750087	-0.0113419
CCDC93	0.0247124	-0.0179021	0.014271	0.0150002	0.0019608	-0.0567547	-0.122015	-0.026961	-0.0442864	-0.0068853
CCDC96	0.0364708	0.00308114	-0.012647	0.00613391	0.0150269	0.00907883	-0.0242166	-0.000878214	0.0426695	-0.0707689
CCDC97	-0.0348822	0.064414	0.0146714	-0.0191748	-0.0131797	0.00426677	-0.00242458	-0.0613872	-0.0623591	-0.08745
CCHCR1	-0.00403942	-0.111783	0.103343	0.046445	0.0482214	0.0482693	-0.00162198	0.00737014	-0.1319	0.00631993
CCIN	0.0138722	-0.00820233	0.408047	0.0768604	-0.00526002	4.46e-05	-0.0817951	NA	-0.0579806	-0.0832052
CCK	0.0171222	-0.0660492	-0.104176	0.0161156	0.0559167	-0.0430553	0.199014	0.0122089	0.000422728	-0.120229
CCKBR	0.00440626	0.0919769	-0.0384095	-0.0161706	-0.0132097	-0.0609482	0.128232	0.0546776	0.062151	-0.0866
CCL19	0.80565	-0.303034	0.013032	0.00635802	0.0936393	-0.000596263	-0.566245	NA	0.214662	0.321136
CCL2	0.821526	0.289685	0.311869	0.159638	0.176239	0.015941	1.61458	0.0527833	0.399708	0.454336
CCL28	0.0204554	0.0508631	0.00226656	0.0569848	0.0154074	0.0181984	0.116309	-0.0845084	0.170034	0.14174
CCL3L3	NA	0.0958687	0.0981495	-0.19297	-0.0985706	NA	-0.239073	-0.478301	-0.319636	-0.386527
CCL5	0.095975	-0.38746	0.191386	-0.182197	-0.31626	0.0901482	-0.411091	-0.426441	-0.451522	-0.706524
CCM2	0.120972	-0.0254505	-0.00813249	-0.00714698	0.00569452	-0.0374763	0.034842	0.0156999	-0.0873156	-0.0673309
CCM2L	0.105016	0.0826885	-0.147174	-0.084985	-0.0416068	-0.0567045	-0.20452	-0.0610957	-0.265931	-0.231602
CCNA1	0.0258667	-0.195041	0.0111756	0.0209958	-0.00271205	-0.0473025	0.0640194	0.142455	0.0189013	0.0182711
CCNA2	0.0452383	0.0111099	0.217057	0.0179812	-0.0807147	-0.026989	-0.337121	-0.0981235	-0.198135	0.0624734
CCNB1	0.00543233	-0.126032	-0.0143461	-0.0112515	0.0269431	-0.0346335	0.0950795	-0.0584701	0.00142306	-0.000446239
CCNB1IP1	-0.275322	-0.0099809	-0.0914954	0.0217898	0.0698937	-0.0360174	-0.00981983	-0.0156942	0.0036066	-0.0146504
CCNB2	0.0313045	-0.0374163	0.321861	-0.100679	0.00829711	-0.022011	-0.287213	-0.0349209	-0.141524	0.0528831
CCNC	0.180082	-0.377326	-0.0206076	-0.00916426	0.0258332	-0.00132302	0.0515104	0.00914519	0.151029	0.0648486
CCND1	0.196835	-0.410955	0.147961	-0.0830748	-0.111847	-0.0764547	-0.136324	-0.171771	-0.0621233	0.144521
CCND2	-0.0248169	-0.168734	0.0358872	0.00357701	-0.00432767	-0.0558522	0.0408717	0.00861866	0.0915885	-0.0365606
CCND3	0.144775	0.0207288	0.0192484	0.0448361	0.0127001	-0.0202715	0.0483499	0.0212147	-0.0452227	-0.0437348
CCNDBP1	-0.0747906	-0.00266987	-0.0629364	-0.00579764	0.00970332	-0.0189468	0.044811	-0.00406317	0.0409263	0.0308197
CCNE1	0.00500185	0.0840105	-0.099092	0.00134589	0.0529613	0.023983	0.0558376	-0.0723936	-0.00132391	-0.0811001
CCNE2	-0.0352011	-0.0567792	-0.266532	-0.167296	-0.119794	-0.0551224	-0.194332	-0.10312	-0.0715294	-0.033098
CCNF	0.0687239	0.172446	0.081261	0.0816218	0.0857214	-0.0155798	0.0337153	0.120187	-0.0230994	0.0113677
CCNG1	-0.235303	-0.183071	0.115083	0.0249301	0.02786	-0.0486121	0.0305412	-0.0243925	0.155383	0.0904693
CCNG2	0.163743	-0.177381	0.012565	0.0173992	0.0267691	-0.00673034	0.0234731	-0.0716836	0.0322821	0.0285542
CCNH	0.0480535	-0.205675	-0.022099	-0.0197078	0.0120534	-0.0366186	-0.020137	-0.0349365	0.123255	0.048584
CCNI	0.21136	0.128671	-0.137635	-0.0115669	0.0266377	0.0200964	0.0406609	-0.055886	0.0357811	0.047279
CCNI2	NA	0.073123	-0.0602664	-0.0331127	-0.0629332	NA	-0.0954752	-0.0171231	-0.0388665	-0.0566131
CCNJ	0.0177157	-0.0468726	-0.0487509	-0.0197703	-0.0372619	-0.0431576	-0.14198	-0.0433681	-0.0197313	-0.0339254
CCNJL	NA	NA	0.183594	0.0563546	-0.0289945	0.0215999	-0.160356	-0.0352379	-0.153271	0.130109
CCNK	-0.00858991	-0.0486954	0.141148	0.0415758	0.0315281	-0.0095081	0.0670397	-0.0137286	0.0867694	0.105558
CCNL1	0.134267	-0.0914778	0.0502006	0.0215446	0.0506808	-0.0382643	-0.0141171	-0.0337311	0.0208135	0.0995742
CCNL2	-0.00781013	-0.020821	-0.0491842	-0.0195034	0.00629073	-0.0533722	-0.166089	0.0370085	-0.121232	-0.0235135
CCNO	0.226007	0.220253	-0.192276	0.151724	0.1668	0.0143984	0.380023	0.307214	0.0166317	0.14948
CCNT1	0.0337166	-0.0706007	0.0323851	0.0219306	0.010492	-0.00560174	-0.00691334	-0.0524411	0.0963722	0.0544866
CCNT2	-0.0791104	-0.0734135	0.0255075	-0.00398673	0.000379195	-0.000433327	-0.0313912	0.00836994	0.0732862	0.0204385
CCNY	-0.23536	-0.112029	0.016562	-0.0170356	-0.00221064	-0.025378	0.0705082	-0.0211493	0.0459971	0.0203057
CCNYL1	0.0971936	0.0109651	0.0309223	-0.0126602	0.0112434	-0.0673546	0.0782028	0.0585924	0.146911	0.0306321
CCP110	0.183188	-0.0541875	-0.0809441	-0.0264772	-0.0368292	0.0210092	-0.130985	-0.048884	0.0855679	-0.0152726
CCPG1	NA	NA	-0.0324258	-0.0306927	-0.0170545	-0.0267147	-0.00911312	0.0581805	0.052329	0.0410695
CCR1	0.18486	0.0370489	0.3059	-0.0231315	-0.0284002	-0.0761096	-0.103	-0.301449	-0.0324342	-0.0139958
CCR10	0.126636	0.0563226	-0.0976567	-0.0475395	0.043971	-0.0561463	0.00550627	0.0197353	-0.0259924	0.0212431
CCS	-0.0756305	-0.0613602	0.0247396	0.0306686	0.0422609	-0.016685	-0.0224488	0.0218878	-0.0874354	-0.0244188
CCSAP	0.0273572	-0.17669	0.0934657	-0.000531615	0.013923	-8.6e-05	0.213802	0.127523	0.246951	0.0422111
CCSER1	0.00532765	0.0379404	-0.0869664	0.00118206	0.0277383	-0.0243433	0.0153706	0.0667007	0.1277	0.0592744
CCSER2	0.134317	-0.37131	-0.0530308	-0.0236732	-0.00739801	0.0149877	0.0476403	0.00841857	0.137806	0.0298106
CCT2	0.0478986	-0.0535848	0.033838	0.0142474	0.00747484	-0.00813886	0.101961	0.0158642	0.113985	0.00909728
CCT3	0.082019	0.186101	0.0898058	0.0274303	0.00287792	0.0130258	0.109527	0.0378541	0.0825067	0.0169654
CCT4	-0.0589661	-0.178429	0.0701945	0.00652407	-0.0107983	-0.0374494	0.0966225	0.0151008	0.113488	0.0142471
CCT5	-0.159942	0.024566	0.0496966	0.00738164	-0.00383522	-0.022367	0.114048	0.0338704	0.133752	-0.00449054
CCT6A	0.0800776	0.053523	0.0364291	0.0108271	0.00865315	0.0168321	0.125804	0.0173703	0.13789	0.0333068
CCT6B	0.0173221	0.0104746	-0.189294	0.00583998	0.00593879	-0.0124843	-0.0929871	-0.141325	-0.0489964	0.0475408
CCT7	0.0987593	0.0626751	-0.00935439	0.0308005	0.0143775	-0.0164297	0.150051	0.0635301	0.103309	0.0269486
CCT8	0.0876635	-0.0816479	0.0384047	0.0387631	0.0244808	-0.00654316	0.110359	0.0328802	0.18218	0.0315235
CCZ1	-0.00865246	-0.135736	-0.0196252	-0.00255202	-0.00676331	-0.0285349	-0.099943	0.00674053	0.031626	0.0407366
CCZ1B	NA	-0.384879	-0.0625595	-0.0341188	-0.0465612	NA	-0.0692669	0.0123418	-0.022075	0.030939
CD101	0.00495962	-0.090782	-0.00724384	0.00399341	0.0153647	0.00738058	0.0263021	-0.191253	0.12673	-0.0796032
CD109	-0.0127215	0.0132723	0.0497029	0.0595554	0.0133001	0.00843133	0.111868	-0.0902156	0.0906152	0.162581
CD14	0.287188	0.0609952	0.463445	0.120967	0.106255	-0.0626157	0.0262041	-0.12733	-0.23679	0.00618085
CD151	0.0541385	0.151592	0.14697	0.0172577	-0.0113718	-0.0174837	-0.0936066	-0.00313066	-0.111849	0.065434
CD160	-0.216848	0.0233847	0.131957	-0.016434	-0.0777457	0.0465085	-0.155216	-0.195234	-0.0500114	-0.0470321
CD163	0.487441	0.490046	0.48834	0.34719	0.0364776	0.013693	0.0264342	-0.432149	-0.297524	0.167079
CD163L1	-0.156796	0.0764792	-0.102333	-0.0704255	0.00964726	-0.0095755	0.00404431	0.0261685	-0.0282589	0.127352
CD164	-0.148878	-0.127523	0.0773284	-0.00415308	-0.0234682	0.0106721	0.0337574	-0.0656382	0.068913	0.107562
CD200	-0.0600305	0.120592	-0.0734764	0.0345608	0.0442604	0.000977387	0.20006	0.119115	0.210249	0.023213
CD22	0.2129	0.0522131	-0.209018	-0.0234638	-0.0937906	9.16e-05	-0.529454	-0.0932649	-0.204656	-0.217861
CD247	0.459414	-0.0590238	-0.0238804	0.0369512	0.055298	0.071808	-0.0886118	0.0533838	0.0211583	-0.162367
CD248	0.451943	-0.214673	0.178434	0.0671204	-0.0111781	0.0287554	0.225207	0.252012	0.179885	0.511368
CD27	0.334661	-0.0901827	-0.127237	-0.187485	-0.0828688	-0.0235629	-0.285404	0.00567033	-0.231295	-0.00333563
CD274	0.299551	0.128016	0.180671	0.0137492	-0.0029587	-0.0288462	-0.104935	-0.11602	0.045588	-0.0202837
CD276	0.123862	0.168663	0.0415779	0.014643	0.027117	-0.00128836	-0.107321	-0.00577815	-0.118643	-0.114142
CD2AP	-0.355009	-0.0970092	0.0176075	0.00378571	0.00209179	-0.0843045	-0.0708151	-0.110714	-0.0297748	0.123492
CD2BP2	-0.0134549	0.309436	0.0292376	0.0189238	0.0289296	-0.0133593	0.048887	0.0547835	0.0199117	-0.0175583
CD300A	0.383544	0.2056	0.298363	0.0109482	0.0194855	-0.0172221	-0.215283	-0.262013	-0.330091	-0.130458
CD300LF	0.258651	0.0363561	-0.0547662	-0.0933556	-0.107298	0.0386417	-0.138092	0.1769	-0.114532	0.0241305
CD302	0.115582	-0.262946	0.111203	0.0558712	0.0381356	-0.0988717	-0.0728661	-0.16939	0.0276432	0.157452
CD320	-0.0176369	0.0805565	-0.135655	-0.0211313	0.0342171	0.019195	-0.111039	-0.0359222	-0.201094	-0.122571
CD34	0.459046	-0.257901	-0.525762	-0.0631257	-0.196407	-0.0289045	-0.141421	-0.0930281	-0.127922	0.00149506
CD37	0.497032	0.032357	0.194209	-0.067961	-0.149847	-0.0206341	-0.274555	-0.186833	-0.206783	-0.100437
CD38	0.816838	-0.115879	-0.152094	-0.00423191	0.0126344	0.0132552	-0.27442	-0.321379	-0.223502	-0.317924
CD3EAP	0.00388559	0.0155483	-0.0210145	-0.0416608	-0.0150623	0.0402983	0.0960355	0.0818527	0.0193037	0.0272128
CD4	0.16923	-0.0339819	0.244566	-0.052114	-0.0457034	0.0363253	-0.24004	-0.18997	-0.171829	-0.132491
CD40	0.483292	-0.0132086	0.334621	0.11883	0.0913864	0.062246	-0.0913605	-0.0683661	-0.064596	0.308362
CD44	0.458277	0.277167	0.656893	0.312376	0.1326	-0.0385321	0.569164	0.123061	0.442357	0.475442
CD46	-0.0371112	-0.208058	-0.131153	-0.0221097	0.0120365	-0.0705207	-0.0534997	-0.00641854	0.0446105	0.0246638
CD47	0.0292078	0.0285225	-0.0421624	-0.026735	-0.0259666	0.029453	0.0561356	0.0462396	0.1791	-0.00576705
CD5	NA	-0.0297046	-0.0854066	0.0196928	0.00648065	0.0639924	-0.0711907	0.106495	-0.12278	0.273533
CD52	0.702633	-0.177485	-0.176767	-0.130424	-0.122294	-0.120644	-0.0635184	NA	0.0606896	-0.499583
CD53	0.505639	-0.0279987	0.260693	-0.0328131	-0.0059365	-0.0611446	-0.137494	-0.186235	-0.173556	-0.0310503
CD55	1.21088	-0.131961	0.0466044	-0.0228355	-0.0119465	0.0556548	-0.0532604	-0.0261044	0.0654987	0.103544
CD58	0.0685923	-0.220511	0.225659	0.0416539	-0.0264701	-0.023214	-0.123916	-0.197278	0.0892393	0.127417
CD59	NA	NA	0.152552	0.061617	0.0300848	-0.0222389	0.208929	0.041886	0.0874614	0.149483
CD6	0.43909	0.0480149	0.252249	0.0996751	0.221117	0.00850752	0.0625173	0.366245	0.0542312	0.216576
CD63	0.071088	0.00383005	0.214147	0.0292253	0.0235497	-0.0234922	0.0945566	-0.0642616	-0.033597	0.0113649
CD74	0.777306	0.491881	0.0494975	-0.117288	-0.119566	-0.0932823	-0.253913	-0.466641	-0.277278	-0.441816
CD81	0.329733	0.0947245	0.147839	0.0686639	0.0304944	-0.00402795	0.109962	0.00354989	-0.0393951	0.0415065
CD82	0.498742	0.0155475	0.0247365	0.00609959	-0.0148291	-0.0374792	0.0581867	0.00612128	-0.0391741	0.0223018
CD83	0.527468	0.217011	0.21904	0.0553694	0.0693443	0.0336738	0.127257	0.0521091	0.174294	0.101622
CD84	0.319629	-0.0210103	0.12009	-0.289703	-0.252183	-0.0670109	-0.559622	-0.6524	-0.209847	-0.726165
CD86	0.462588	0.0414816	0.0154273	-0.170077	-0.129635	-0.0395688	-0.381608	-0.427728	-0.170047	-0.313288
CD8A	0.299086	-0.036981	-0.0434762	0.0138772	0.0305714	0.00705796	-0.0157336	-0.035469	-0.099625	-0.0829793
CD9	-0.485823	-0.213621	-0.217115	-0.0499295	-0.0826957	-0.121771	-0.0405678	-0.0877692	-0.111746	0.0274279
CD99	-0.116914	0.319664	0.345779	0.146898	0.0933221	-0.018984	0.0969213	-0.0883812	-0.0430225	0.108788
CD99L2	0.153214	-0.0399699	-0.1297	-0.0048707	0.0253705	0.0371181	0.135506	0.0897718	0.0934952	0.0380453
CDA	0.432742	0.10498	-0.149007	0.16602	0.0112025	0.0146707	0.21964	NA	-0.17634	0.123663
CDADC1	-0.0276282	-0.0731719	-0.0848159	-0.00772015	-0.0105362	-0.00867449	-0.00194016	0.0124381	0.0958311	-0.0726685
CDAN1	0.0379733	0.0314675	0.0668976	-0.0147322	-0.00123906	-0.0346646	-0.0938573	0.0932292	-0.145026	-0.0200344
CDC123	0.0558232	-0.156095	-0.0344267	0.0111067	0.0131947	0.00169921	0.0786986	-0.0179143	0.0733781	0.00830896
CDC14A	-0.454524	-0.16045	0.222485	0.0390976	-0.0488627	0.0123083	-0.10513	-0.18045	-0.0814112	-0.0174615
CDC14B	-0.241421	-0.0935093	0.0387775	-0.0055936	0.0005679	-0.071085	-0.159038	-0.0560398	-0.0728473	-0.0383777
CDC16	-0.000947158	-0.173948	0.0534264	-0.0112166	-0.016608	-0.0111523	-0.0846548	-0.0512652	-0.0172754	-0.0555551
CDC20	-0.0609103	0.0330279	-0.290195	-0.190088	-0.219148	-0.00117292	-0.141246	NA	-0.0493365	-0.364903
CDC23	-0.0408961	-0.325814	-0.012123	0.00171268	0.00313889	-0.00106727	0.0102492	-0.0585423	0.00870543	0.0911869
CDC25A	-0.0450261	-0.0978419	0.191033	-0.000972814	0.0233635	0.00133111	-0.171667	-0.0815747	0.0837683	0.0012698
CDC25B	0.487864	0.295503	0.0289566	-0.0370298	-0.0359026	-0.0471247	-0.10987	0.00960136	-0.134327	-0.0159381
CDC27	0.0100347	-0.014738	-0.034817	-0.0155678	0.00967968	0.00510186	0.0454925	0.00729637	0.178356	0.0437548
CDC34	-0.0978376	0.357296	0.0882682	-0.00151114	0.0196261	-0.0599201	0.0798424	0.0793942	-0.0224951	-0.0263609
CDC37	0.0737762	-0.0552064	0.0191364	0.025624	0.0297207	-0.0451424	0.0730085	0.0523008	0.0485451	-0.0303557
CDC37L1	0.0447696	-0.0796381	0.0599328	0.0117712	0.00663494	-0.0873867	0.096112	0.023955	0.0716824	-0.0318731
CDC40	-0.0153021	-0.179022	-0.115681	0.0183007	0.0109976	0.00850852	0.0964955	0.0805412	0.137382	0.0741952
CDC42	-0.0682525	-0.335656	-0.0577585	-0.0704323	-0.0196097	-0.00137523	0.0813018	-0.0421571	0.117368	-0.00494964
CDC42BPA	-0.16113	0.22219	-0.0259748	0.00298284	-0.0227172	0.0178236	-0.0563991	-0.0214666	0.0440476	0.00257651
CDC42BPB	-0.0229749	0.330792	0.0182405	0.0116982	0.0184601	-0.0362156	0.0179174	0.0301374	0.00402987	0.0197412
CDC42EP1	0.105986	0.0888312	-0.14438	-0.0498148	-0.0607525	0.04908	-0.0897467	-0.0096205	-0.161439	-0.00741196
CDC42EP2	0.312383	-0.0846866	-0.175777	-0.0657415	0.0025359	0.0408543	-0.112193	0.0844229	-0.0436098	0.0205772
CDC42EP3	0.00304401	-0.0879431	0.01165	0.0775309	0.0766757	0.0521127	0.147978	0.126323	0.153351	0.0933778
CDC42EP4	-0.203283	-0.0827033	0.168815	0.0611106	0.0358146	-0.0137511	0.0218131	-0.163271	-0.241527	0.034959
CDC42EP5	-0.00314396	0.291881	-0.102064	-0.00152338	-0.0243778	-0.00797412	-0.0578147	NA	-0.022346	0.348575
CDC42SE1	0.128432	-0.0379216	0.0632014	-0.0231464	-0.000917478	-0.0433579	-0.143189	-0.0505614	-0.073894	-0.0536905
CDC42SE2	-0.019432	-0.184529	-0.0519246	0.0295366	0.0246776	-0.00404269	0.0832473	0.0385775	0.199972	0.0202936
CDC45	0.149585	-0.0292451	0.249748	0.00140367	-0.124278	0.00134432	-0.356986	-0.128203	-0.498561	0.208517
CDC5L	-0.0157593	-0.225975	0.0358519	0.0267696	-0.00304558	-0.00475956	0.0447759	-0.0356735	0.126613	0.0180805
CDC6	NA	NA	0.106633	-0.00769064	-0.0240624	-0.00892321	-0.0240351	-0.0142323	0.0530015	0.0298412
CDC7	0.00920487	0.0339451	-0.122648	-0.00422732	-0.00519188	-0.0737659	-0.073657	0.0502207	0.0541514	-0.0550204
CDC73	0.00115616	0.0541124	0.00902581	-0.00251178	0.0175397	-0.058061	0.0143654	-0.0904989	0.052495	0.0581352
CDCA3	-0.0195889	-0.0201476	0.0713429	-0.0243127	-0.0725332	0.0453877	-0.1295	0.142213	-0.0418287	-0.0480447
CDCA4	0.0368785	0.0677047	-0.060491	-0.0065055	0.0048621	0.0276299	-0.0261564	-0.225464	-0.0588396	-0.0599275
CDCA5	0.0657624	0.220277	-0.081105	0.00740952	0.03587	0.018935	0.157731	0.104262	0.106224	-0.0480774
CDCA7L	-0.107389	-0.0664943	0.0691319	-0.0950661	-0.0547266	-0.0360736	-0.202217	-0.172138	-0.210847	-0.0536853
CDCA8	-0.0488878	0.0993742	0.0488704	0.02403	0.00262092	0.0260908	-0.127457	-0.00028708	-0.0444931	-0.0967514
CDH1	-0.208022	-0.138326	-0.184675	-0.134315	-0.222154	-0.0932467	-0.432892	-0.345829	-0.288272	-0.106052
CDH10	0.0185643	-0.127766	-0.00471755	0.0229209	-0.0277162	0.0054584	0.0696113	0.086548	0.249605	0.0582487
CDH11	0.70265	-0.215616	0.0335109	-0.0235733	-0.057515	-0.0751597	-0.0170748	-0.0314166	0.0294221	-0.0308297
CDH12	-0.029213	-0.0724856	-0.0872185	-0.0558177	0.0144885	0.0413897	0.102552	0.116871	0.12952	0.0893122
CDH13	0.197539	-0.0688135	-0.0153854	0.0580679	0.0658725	NA	0.080718	0.123767	0.24411	-0.0371247
CDH18	0.00496894	0.3247	-0.041665	0.0546186	0.0757096	0.0390901	0.203595	0.195989	0.285671	0.156514
CDH19	-0.0550352	0.234296	-0.139215	-0.0455056	-0.101612	-0.0879017	-0.131846	-0.115778	-0.0263517	-0.0269655
CDH2	0.103724	-0.031999	0.047015	0.0216551	-0.00609107	0.0351892	0.107122	0.0244745	0.120495	-0.0213366
CDH20	-0.00714645	-0.0410509	0.0865034	0.0606233	-0.00294399	0.00156972	-0.0535175	-0.10575	-0.0867235	-0.0137908
CDH22	0.0127357	-0.156709	-0.0679938	-0.0202073	-0.0203677	-0.0475622	0.139865	0.0773724	-0.0593431	-0.0250667
CDH23	-0.0216913	0.14301	-0.0818649	0.101136	-0.0317048	0.00943966	-0.208249	0.0166115	-0.126151	0.185299
CDH24	0.00254749	0.0521499	0.0111553	-0.0489693	-0.00494345	0.0431566	-0.0525255	0.0531892	-0.00900615	-0.121345
CDH26	-0.00462189	-0.0689309	0.0698817	0.00972495	0.0490696	0.0806504	-0.0839469	0.0611031	-0.107363	0.171937
CDH3	NA	0.16731	-0.0895501	0.071829	0.161603	-0.0122689	0.107056	0.172947	0.0447227	0.188748
CDH4	0.019915	0.301868	0.0818661	0.0228316	0.0186698	-0.0492819	0.0326781	0.0266115	-0.0584403	0.0124218
CDH5	0.398482	0.263547	-0.129236	0.07248	0.0641397	-0.0841535	0.332766	0.24348	0.247067	0.389635
CDH6	0.178396	-0.0275755	-0.040219	0.00183301	-0.0289791	0.0203648	-0.0212994	-0.0148401	0.0979677	0.0128031
CDH7	0.0945471	-0.0155638	-0.0930505	-0.0539228	-0.010398	0.0560851	0.0679933	0.0915293	0.146057	0.0453088
CDH8	0.0214471	0.0260568	-0.0300775	0.0347041	0.0467961	-0.0394731	0.143457	0.102197	0.14849	-0.00414032
CDH9	-0.0305947	-0.0996657	0.0205942	0.0334571	0.0136962	0.018895	0.0453858	0.125882	0.226998	0.00672958
CDHR1	-0.424039	0.230985	0.199373	0.0465688	0.0465674	0.0640351	0.300347	0.289814	0.232284	0.175594
CDHR2	-0.0955145	0.0255788	0.0878878	0.0634263	0.078788	0.015886	-0.0521008	0.0651097	-0.0436096	-0.0154814
CDHR3	-0.152199	-0.144976	0.235633	0.0176877	0.0059548	-0.0101896	0.0223031	0.0340716	0.00999559	0.132582
CDHR5	-0.359791	-0.012043	-0.118836	0.00771727	-0.0765586	-0.0225856	0.00548503	0.241958	-0.0422761	0.160889
[truncated: 11,817 more rows]

## Sheet: Developmental gene lists
Epilepsy_OMIM	DDG2P	01_AutismKB	02_AutismKB_core	04_SFARI_score4plus	07_Gilman_Netbag	08_Iossifov_RDNV	09_DeRubeis_RCV	11_Parikshak_ID_genes	12_Pinto_ID_genes	13_Fromer_SCZ_allRDNV	14_Cocchi_Pruning	15_Betancur_ASD	ASC_ASD	10_Darnell_FMRP
ARHGEF9	CEP290	A1BG	RELN	ABAT	AATF	APH1A	SCN2A	ABAT	SKI	ZNF565	NGF	CAMTA1	ADNP	AGPAT3
ARX	FLNA	A2M	CNTNAP2	ADA	ADAM5	C20orf111	SYNGAP1	ADA	GALE	NRIP1	BAX	MMACHC	ANK2	CNP
CDKL5	SLX4	AAA1	OXTR	ADK	ADSL	ITGA5	CHD8	ADSL	FUCA1	LRP1	CASP3	POMGNT1	ANKRD11	AKAP9
KCNQ2	ARG1	AADACL2	NLGN4X	ADNP	ATP8B1	MTMR12	ARID1B	AGTR2	ARID1A	CCDC137	CASP6	RPE65	AP2S1	AKAP6
PCDH19	POLR3A	AANAT	GABRB3	ADORA2A	AXIN1	PLXNB1	ANK2	ALDH5A1	PIGV	KPNA1	XIAP	DPYD	ARID1B	ARF3
PLCB1	ATR	AARS	C4B	ADRB2	BAIAP2	POGZ	SUV420H1	ARX	SLC2A1	ZNF480	PLXNA3	NRXN1	ASH1L	ARFGEF1
PNKP	ALG9	AASDH	MET	ADSL	BAZ1B	PPP1R15B	DYRK1A	DHCR7	ST3GAL3	EIF5	PLXNA4	NPHP1	ASXL3	AFF3
PNPO	YAP1	ABCA1	FOXP2	AFF2	CACNA1B	PRPF39	GRIN2B	C3orf58	STIL	ALS2CL	BCL2	MBD5	BCL11A	AFF4
SCN1A	BBS9	ABCA12	HLA-DRB1	AGAP1	CDC45	RELN	ADNP	DMPK	ALG6	CHD4	DIAPH1	TBR1	CACNA1E	AAK1
SCN2A	TRIM32	ABCA13	SLC6A4	AGBL4	CHRNA7	SMARCC2	TBR1	DMD	DBT	KDM2B	THBS1	SCN2A	CACNA2D3	AHDC1
SLC25A22	NSD1	ABCA2	RBFOX1	AGMO	CLPB	SPAST	POGZ	DPYD	AP4B1	LAMA1	CACNA2D1	SCN1A	CELF4	ARID1A
ST3GAL3	ADAR	ABCB9	EN2	AGTR2	CRHR1	SPP2	CUL3	FMR1	NRAS	CASP4	APOE	SATB2	CHD2	ARID1B
STXBP1	MTOR	ABCC1	BDNF	AHI1	CRKL	ST3GAL6	KATNAL2	FOXP2	GATAD2B	SDF4	NTRK1	HDAC4	CHD8	ARID2
SZT2	NAA10	ABCC12	NRXN1	ALDH5A1	CSMD1	SUCLA2	BCL11A	IL1RAPL1	KCNJ10	PIK3CB	BDNF	SETD5	CORO1A	ATG2A
TBC1D24	MOGS	ABCC5	MARK1	ANK2	CTNNA3	SVIL	CACNA2D3	MAOA	ASPM	SBNO1	TGFB1	BTD	CREBBP	ATG2B
ALG13	AGPS	ABCC8	SLC25A12	ANKRD11	CTNND2	TBX18	MIB1	MCPH1	SYT14	GIF	PCDH10	CTNNB1	CTNNB1	ATG9A
CHD2	OFD1	ABCD2	SEZ6L2	ANXA1	CYFIP1	TCF3	GABRB3	MECP2	RAB3GAP2	PLCL2	MDM2	AMT	DEAF1	ATMIN
DNM1	PAFAH1B1	ABCG4	MAPK3	APBA2	DCC	ZMYM2	KMT2C	NF1	TBCE	VN1R4	RHOA	FOXP1	DIP2A	ACLY
GABRA1	CAMTA1	ABHD14A	NLGN3	AR	DDX53	ZNF292	PTEN	NTRK1	FH	MAGEC1	SEMA3F	CC2D2A	DNMT3A	ATP5A1
GABRB3	HRAS	ABHD14B	ASMT	ARID1B	DKK1	ADNP	RELN	RAI1	MYCN	RFX3	NRP2	PRSS12	DPYSL2	ATP5B
GNAO1	OFD1	ABHD15	MAOA	ARNT2	DLG1	ARID1B	ASXL3	RELN	SOS1	SZT2	UBE4B	NIPBL	DSCAM	ABCA2
GRIN2A	LAMA1	ABHD3	MECP2	ARX	DLG2	ASAH2	MYO9B	SLC6A8	ERCC3	HLA-C	THBS4	HCN1	DYNC1H1	ABCA3
KCNT1	ERLIN2	ABI2	SHANK3	ASMT	DLG4	BRWD1	ETFB	TSC1	RAB3GAP1	TEKT5	BCAN	MEF2C	DYRK1A	ABCG1
SCN8A	PCCA	ABI3BP	GABRA5	ASTN2	DVL2	CDC42BPB	ASH1L	TSC2	ZEB2	WDR11	EFNA3	ALDH7A1	ELAVL3	AGTPBP1
SLC35A2	FKRP	ABLIM2	FMR1	ATP10A	EHMT1	CHD8	TRIO	UBE3A	BBS5	UBR5	TNC	NSD1	FOXP1	ATP13A2
SYNGAP1	COX15	ABTB1	GAD1	ATP2B2	FANCA	CNOT3	NAA15	CDKL5	GAD1	PPP1R14D	TNR	ALDH5A1	FOXP2	ATP2A2
FASN	COG7	ACACB	KCNMA1	AUTS2	FLNA	COL25A1	MYT1L	NLGN3	TMEM237	LCT	THBS2	SYNGAP1	GABRB2	ATP2B2
GABBR2	SCN2A	ACADM	EIF4E	AVPR1A	FMN2	CUBN	NR3C2	NLGN4X	HDAC4	THBS1	NCAN	MUT	GABRB3	ATP2B4
HDAC4	MECP2	ACADSB	CADM1	BCKDK	GOLGA4	CUL3	APH1A	RPL10	D2HGDH	DPYD	PTPRB	AHI1	GFAP	ATP6V0D1
PIK3AP1	BRAF	ACCN1	MACROD2	BZRAP1	GREM2	DHRS4L1	VIL1	SLC9A6	CRBN	CELF2	RND1	PEX7	GIGYF1	ATP6V1B2
RANGAP1	CBL	ACHE	GRPR	C15orf43	GRK5	DNAH5	CDC42BPB	RAB39B	SUMF1	TEP1	EPHA4	SYNE1	GNAI1	ATP6V0A1
RYR3	POMGNT1	ACIN1	DRD3	C3orf58	IKBKG	DYRK1A	BIRC6	PTCHD1	TSEN2	SYNGAP1	SEMA3A	ARID1B	GRIA2	ATP1A1
TTN	PIGO	ACLY	DRD4	C4B	ITPR1	ETFB	GALNT18	NRXN1	RAF1	OR4C46	EPHB1	HOXA1	GRIN2B	ATP1A2
	PLK4	ACO2	AUTS2	CA6	KLF13	FOXP1	MTMR12	CNTNAP2	TGFBR2	HIST1H1E	EPHB2	AUTS2	HDLBP	ATP1A3
	ARSA	ACOT7	BCL2	CACNA1C	LIMK1	GRIN2B	EP400	GRIN2A	GLB1	PAG1	EPHB3	COG5	HECTD4	ATP1B1
	CLN3	ACP2	RPL10	CACNA1F	MALL	IQGAP2	ZNF774	SHANK2	CTNNB1	IRS1	DOCK1	BRAF	IRF2BPL	ATP9A
	FOXP2	ACP6	ARID1B	CACNA1H	MAPK3	KATNAL2	DPP3	SHANK3	GTDC2	SPATA5	NCK2	CNTNAP2	KCNMA1	AGAP1
	SLC6A3	ACSBG1	IL1RAPL1	CACNB2	MAPT	KIAA0100	FCRL6	HRAS	LZTFL1	UGT1A3	TNFRSF21	TUSC3	KCNQ3	AGAP2
	CHAMP1	ACSL4	TBR1	CADM1	MED27	LTN1	SMURF1	AASS	DAG1	NPRL2	RACGAP1	HGSNAT	KDM6B	AGAP3
	CLN8	ACSL5	FOXP1	CADPS2	MLXIP	MBD5	TTLL3	ABCC8	ARL13B	FAM3D	CDH2	CHD7	KIAA0232	ARAP2
	RTEL1	ACSS2	SEMA5A	CASC4	MYH11	MLL3	UTP6	ACOX1	ARL6	TAF7L	APP	VPS13B	KMT2C	ADAP1
	MKKS	ACTA1	PTEN	CC2D1A	NDE1	PDCD1	CARKD	AGA	CEP63	RB1CC1	GRIN1	SMARCA2	KMT2E	BCL9L
	FLNA	ACTL6B	GABRA4	CCDC64	NLGN3	POLRMT	DNAH10	AK1	ATR	CSPG4	PICK1	STXBP1	KMT5B	BAT2L2
	NAGA	ACTN1	TUBGCP5	CDH10	NPHP1	RPS6KA3	PPM1D	ALDH3A2	ALG3	DDHD2	GRIA3	POMT1	LDB1	BRSK1
	PLCB1	ACTR1A	FEZF2	CDH22	NRXN1	SETBP1	JADE2	ALDH4A1	KIAA0226	INTS10	DRD2	TSC1	LRRC4C	BRSK2
	ARX	ACTR1B	DISC1	CDH8	NSF	SETD2	S100G	ALDOA	IDUA	KLF12	DLG4	EHMT1	MAP1A	BAP1
	SMARCA2	ACY1	AVPR1A	CDH9	PAK2	SLC7A7	GSE1	ALG12	CC2D2A	TRRAP	DLG1	PTEN	MBD5	CTBP1
	IQSEC2	ACY3	IMMP2L	CDKL5	PHF2	TBR1	CSNK1E	ALG2	QDPR	TUB	PARK2	FGFR2	MED13L	CLEC16A
	CEP290	ADA	CDH10	CEP41	PMM2	TRPM5	KIAA0100	ALG3	SRD5A3	PHF23	GRIN2A	HRAS	MKX	C2CD2L
	DPAGT1	ADAM17	ST8SIA2	CHD2	PRDX3	TSPAN17	CACNA1D	ALG6	TMEM165	AHNAK2	DRD1	DEAF1	MYT1L	CLIP3
	LGI1	ADAM22	PRKX	CHD7	PRKG1	UBR3	RAB2A	AMT	CEP135	ADCY7	GRID2IP	IGF2	NACC1	CASKIN1
	CDC6	ADAM33	CYFIP1	CHD8	PRMT8	USP15	PCOLCE	ARG1	SLC4A4	PITPNM1	NTRK2	KCNJ11	NCOA1	CDC42BPA
	PIGV	ADAMTS3	NIPA1	CHD8	RFX3	ADAM33	MYOC	TINAGL1	BBS7	GPR153	GIPC1	SHANK2	NR3C2	CDC42BPB
	MAGEL2	ADAMTS9	UPP2	CHRNA7	SET	BTN1A1	SLCO1B1	ARHGEF6	BBS12	RGS12	RAB3A	DHCR7	NRXN1	CREBBP
	SLC2A1	ADARB1	NTF4	CLTCL1	SGSM3	CSDE1	SLC6A1	ARSA	AGA	PAPPA2	ICA1	FOLR1	NSD1	CRTC1
	HADH	ADCY5	ITGB3	CNTN4	SMARCA2	EPHB2	ATP1B1	UBA2	NSUN2	ESAM	CDC20	HEPACAM	NUP155	CADPS
	PRRT2	ADCYAP1	HOXA1	CNTNAP2	SPTAN1	FAM8A1	SCARA3	ASAH1	ANKH	CLIC5	NTF3	CACNA1C	PAX5	DAB2IP
	PAFAH1B1	ADH5	SCN2A	CNTNAP4	STUB1	FCRL6	KRT34	ASL	C5orf42	PML	CACNG2	GRIN2B	PHF12	DDX24
	OTC	ADI1	TSC2	CNTNAP5	SUMF1	FREM3	BRWD1	ASPA	MOCS2	P2RY2	GRIN3B	KRAS	PHF2	DHX30
	JAM3	ADM	GRIK2	CTNNA3	TADA2A	MPHOSPH8	PRPF39	ASPM	ERCC8	C16orf62	ACTG1	SCN8A	PHF21A	DENND5A
	NALCN	ADNP	FBXO33	CTNNB1	TAOK2	NAPRT1	SIX2	ASS1	SIL1	DHX8	GDI1	GNS	POGZ	DIP2A
	ATP7A	ADORA2A	MAPK1	CUL3	THAP7	PPM1D	CCSER1	ATP2A2	TUBB2B	ACOT6	SLC6A3	BBS10	PPP1R9B	DIP2B
	BBS10	ADORA2B	LRFN5	CYP11B1	TRA2B	RAB2A	GGNBP2	ATP7A	NEU1	SAP30BP	CFL1	CEP290	PPP2R5D	DIP2C
	FTO	ADPRHL1	RAPGEF4	DDX53	TSSK2	RNF38	NRXN1	ATR	MOCS1	ZBTB40	FLNA	PAH	PPP5C	DIRAS2
	POMT2	ADRA1B	NTF3	DEAF1	TTC28	SCN2A	WHSC1	SERPINA2P	SLC17A5	HIST1H2AG	ACTB	PTPN11	PRR12	DOT1L
	KIF1BP	ADRA2B	GSTM1	DHCR7	TUBGCP5	SCP2	KLC1	ANTXR1	ELOVL4	FAM13C	PFN1	CHD8	PTEN	DGCR2
	IFT172	ADRB2	CDH9	DISC1	USP7	SHANK2	RANBP17	ATRX	BCKDHB	HMGCR	S1PR1	FOXG1	PTK7	DMXL2
	CC2D2A	ADSL	COMT	DLGAP2	WNK2	ABCA12	LEO1	AVPR2	RARS2	SPATA22	LIMK1	L2HGDH	RFX3	DNAJC6
	INPP5E	AEBP1	SBF1	DLX2	WNT3	ABCA13	PTPRM	B4GALT1	GRIK2	URB2	CDC42BPB	MAGEL2	RORB	DSCAM
	CACNA1D	AEN	UBE3A	DLX6	ZNF276	ADAM22	KDM4B	B4GALT7	SOBP	STAC2	LURAP1	UBE3A	SATB1	DSCAML1
	SATB2	AES	GRIN3B	DMD	ZNF383	AHNAK2	SETBP1	BBS1	LAMA2	MUC5B	CDC42BPA	HERC2	SCN1A	EP300
	DOCK8	AFF2	POGZ	DMPK	ZNF585B	ANKS1A	SRPK2	BBS2	ARG1	SLC4A8	EPHA5	SPRED1	SCN2A	EP400
	SLC46A1	AFF4	TTN	DPP10		ANTXR1	ZNF559	BBS4	MED23	TREM2	EFNA5	GATM	SETD5	EPHA4
	AGA	AFM	RIMS3	DPP6		APOC3	CSDE1	MKKS	GTF2H5	DAB2IP	MAP1A	MAP2K1	SHANK2	FBXL16
	BRCA1	AGA	LRP1	DPYD		ASB1	JUP	BCKDHA	ACTB	ABCG4	RAP1A	CHD2	SHANK3	FBXL19
	AFF2	AGAP1	CHRNB2	DRD3		BRCA2	QRICH1	BCKDHB	FAM126A	MYH10	EPS15	TSC2	SIN3A	FBXO41
	MRPS22	AGBL4	ATP13A4	DYRK1A		C12orf41	GSDMC	BCS1L	BBS9	RRP1B	LSS	CREBBP	SKI	FAT1
	HOXA1	AGK	FEZF1	EHMT1		C3	AGAP2	BSCL2	C7orf11	TOP3B	FADS1	SRCAP	SLC6A1	FAT2
	GPSM2	AGPAT9	SHANK2	EIF4E		C7orf43	PLA1A	BSND	GUSB	SPIB	SCD	BCKDK	SMARCC2	FAT3
	ACTB	AGTR2	GABRG3	EN2		CACHD1	HDLBP	BTD	AP4M1	BIRC6	DHCR7	RPGRIP1L	SPAST	FAT4
	AFG3L2	AGTRL1	TRIO	EPC2		CCDC18	TGM1	CA2	RELN	CYTH1	CRY2	ANKRD11	SRPRA	FCHO1
	EBP	AHCY	VIP	ESR2		CCDC90B	LRRC14	CBS	DLD	ARHGEF38	RBM22	YWHAE	STXBP1	FRMPD4
	CACNA1D	AHCYL2	TUBA1A	ESRRB		CDCA7L	KDM3A	NLRP3	CEP41	BRPF1	HSD17B7	PAFAH1B1	SYNGAP1	FKBP8
	NALCN	AHI1	OTX1	EXT1		CDX2	C11orf30	ERCC8	TPK1	H2AFV	NSDHL	GUCY2D	TAOK1	FYN
	ASCC3	AHNAK2	ARX	FABP5		CECR1	TAF4	CLCNKB	EZH2	AP2A2	HMGCS1	RAI1	TBL1XR1	GPRIN1
	LAMC3	AHRR	CACNA1F	FBXO33		CHD1	TCTE3	PPT1	MCPH1	ZNF530	BTG2	RNF135	TBR1	GPR158
	XRCC4	AHSG	FHIT	FBXO40		CHD2	CERS4	TPP1	ERLIN2	TGM6	EFNA2	NF1	TCF20	GPR162
	PEX13	AHSP	SUV420H1	FEZF2		CIAO1	TCF3	CLN3	CA8	SLC26A8	SET	NAGLU	TCF4	GIT1
	MAT1A	AIF1	DNAH5	FHIT		CST9	SLCO1B3	CLN5	TMEM67	SMAP2	GRIA1	KANSL1	TCF7L2	GCN1L1
	TCF4	AIFM1	MEGF11	FMR1		DAB2	CD163L1	CLN6	RAD21	LARP7	GRIA2	SGSH	TEK	GNAS
	GFM1	AK2	CASK	FOXP1		DAG1	NCKAP1	CLN8	KCNK9	BCORL1	GRIA4	ASXL3	TLK2	GRAMD1B
	TUBA8	AK5	SCN1A	FOXP2		DCAF4	CSTF2T	COX10	TRAPPC9	GPR115	MICALL1	SETBP1	TM9SF4	RALGAPA1
	BBS4	AKAP7	HRAS	FRK		DENND5A	BRSK2	CPS1	RECQL4	MTOR	MICALL2	SMAD4	TRAF7	GARNL3
	PCNT	AKR1C2	KDM5C	GABRA4		DENR	MYH10	CYP21A2	VLDLR	CCDC108	GRIN2D	TCF4	TRIM23	RAP1GAP2
	BUB1B	AKR1C3	PITX1	GABRB3		DPP3	STXBP5	PM20D1	SLC1A1	UNC13C	GRIN2B	GAMT	TRIP12	HEATR5B
	SNAP29	AKT1	MEF2C	GALNT13		DUSP15	SHANK3	CREBBP	PIGO	SLC19A2	GRIN2A	NFIX	UBR1	HUWE1
	TBX1	ALAS1	NRXN2	GLO1		DUSP3	AXL	OFD1	EXOSC3	FBXO7	GRM1	CC2D1A	VEZF1	BAT2
	RPS6KA3	ALDH18A1	PRKCB1	GNB1L		ELK1	IQGAP2	CYP27A1	TGFBR1	TRAK1	GRM2	PIK3R2	WAC	BAT2L1
	SLC25A15	ALDH1A3	GABRB1	GPC6		FAM63B	UBN2	DBT	FKTN	RASGRP1	GRM3	DMPK	ZMYND8	BAT3
	BRAT1	ALDH1L1	KIAA0182	GPX1		FAT1	KDM6B	DCX	TRIM32	RARG	GRM4	MKKS		HMGXB3
	ATP7A	ALDH4A1	KCND2	GRID2		FGF22	CAPN12	CYB5R3	CDK5RAP2	EVC2	GRM5	ADNP		IQSEC2
	ALDH18A1	ALDH5A1	C16orf68	GRIK2		FN1		DKC1	SPTAN1	ZNF229	GRM6	EEF1A2		IQSEC3
	GDI1	ALDH7A1	CACNA1E	GRIN2A		GAK		DLD	KCNT1	UBQLN1	GRM7	DEPDC5		DCAF6
	GLDC	ALOX12B	SLC22A9	GRIN2B		GNRHR		DM1	INPP5E	FASTKD5	GRM8	DYRK1A		JAK1
	TBL1XR1	ALOX5AP	CHRNA4	GRIP1		GPRIN3		DNMT3B	MAN1B1	COL3A1	ROCK1	PRODH		KIAA0090
	L1CAM	ALPK1	DBH	GSTM1		IQCE		DPAGT1	RAB18	XPR1	ROCK2	ADSL		KIAA0100
	MPDU1	ALPL	SLCO1C1	GTF2I		JMJD1C		DPM1	ERCC6	DGCR2	SLIT2	SHANK3		KIAA0226
	TCTN2	ALS2CL	KIAA0100	HDAC4		KCNMA1		DPYS	KIAA1279	LAMA2	UBE4A	NLGN4X		KIAA0284
	TCTN1	AMBP	RPS6KA3	HEPACAM		KCNS1		ATN1	ADK	INPP5A	NMNAT1	MID1		KIAA0317
	CNTNAP2	AMPH	NF1	HLA-A		KIAA1549		DUOX2	KAT6B	EDEM2	NMNAT2	AP1S2		KIAA0430
	SMARCE1	AMT	DMD	HMGN1		KIAA1967		EIF2AK3	POLR3A	PLA2G12B	SLIT3	NHS		TRIL
	MRE11A	AMY1C	SLC6A8	HOXA1		KIRREL3		EMX2	KIF11	C17orf49	NMNAT3	CDKL5		KIAA0664
	RABL6	AMY2B	EHMT1	HRAS		KRTAP9-3		ERCC2	TCTN3	SSBP3	SLIT1	PTCHD1		KIAA0802
	FAT4	ANAPC13	MBD5	HS3ST5		LY6G6F		ERCC3	SMC3	GPRIN3	MEF2A	ARX		KIAA0913
	VPS13B	ANAPC4	TSC1	HSD11B1		MACC1		ERCC5	SHOC2	TBC1D14	MEF2B	IL1RAPL1		KIAA0947
	ERCC3	ANAPC7	ADSL	HTR1B		MANSC1		ERCC6	SLC25A22	NLRC5	MEF2C	DMD		KIAA1045
	SMPD1	ANGPT2	CDKL5	HTR3A		MEF2C		ACSL4	PAX6	C1orf185	MEF2D	OTC		KIAA1109
	WNT4	ANGPTL4	GRIA3	HTR3C		METTL14		FANCA	SLC35C1	FCGBP		CASK		FAM190B
	HADHA	ANK1	AFF2	ICA1		MICALCL		FANCC	PHF21A	KIAA1109		MAOA		RALGAPB
	FLNA	ANK2	IQSEC2	IL1R2		MKL2		FBN1	TMEM138	GNAO1		NDP		KIAA1244
	DDHD1	ANK3	CREBBP	IL1RAPL1		MLL		FKTN	TMEM216	SLC17A1		KDM6A		KIAA1688
	SLC52A3	ANKDD1A	FGD1	IL1RAPL2		MMRN2		FGD1	BBS1	CCDC39		SYN1		KIAA2018
	FRY	ANKLE2	RAB39B	INPP1		MOB4		FGFR1	ALG8	PRKCB		FTSJ1		LYNX1
	HUWE1	ANKRA2	ATRX	ITGB3		MPDZ		FGFR2	MED17	PSG2		PQBP1		MADD
	DYNC1H1	ANKRD12	AGTR2	KATNAL2		MYCBP2		FGFR3	ALG9	STAG1		CACNA1F		MAP7D1
	ARL14EP	ANKRD13A	ARHGEF6	KCNJ10		MYOF		FH	CBL	PRDX6		KDM5C		MKL2
	ADGRG1	ANKRD20A1	PCDH19	KCNMA1		NISCH		FKRP	PVRL1	IGFL2		IQSEC2		MON2
	MPLKIP	ANKRD20A5	CHD7	KCTD13		OBSL1		FLNA	MLL2	MACF1		SMC1A		MYCBP2
	L1CAM	ANKRD29	OPHN1	KHDRBS2		OR8H1		AFF2	TUBA1A	CEACAM18		HSD17B10		MAZ
	CNKSR1	ANKRD35	AHI1	KIAA1586		PCDHB16		FRAS1	DIP2B	ANO9		PHF8		MYST3
	ALG8	ANKRD6	SLC9A6	LAMB1		PER1		FUCA1	SUOX	ARHGEF10		FGD1		NAT8L
	MASP1	ANKRD7	TBX1	LMX1B		PIAS1		SLC35C1	GNPTAB	RECK		OPHN1		NDST1
	ROR2	ANKRD9	MAP2K1	LRFN5		PIWIL4		G6PD	IGF1	NUP54		MED12		NSF
	KCNC3	ANKS1A	MID1	LRP2		PLCD4		GALE	POLR3B	PTPRM		NLGN3		NACAD
	NDP	ANO5	NFIX	LRRC1		POLR2A		GALT	ATP6V0A2	VPS39		KIAA2022		NWD1
	KAT6A	ANTXR1	ALDH7A1	LZTS2		PWWP2A		GAMT	CENPJ	KDM5C		ATRX		NCKAP1
	HDAC8	ANXA1	KRAS	MACROD2		REST		GATM	SLC25A15	CIT		PCDH19		NDRG2
	HDAC8	ANXA11	GAMT	MAOA		RTF1		GCDH	MIR17HG	IFT81		ACSL4		NDRG4
	PDSS1	ANXA2	DHCR7	MAPK3		RTN4RL1		GCH1	ERCC5	HECTD1		DCX		NHSL1
	ALG1	AOC3	PAFAH1B1	MARK1		SBF1		MOGS	COL4A1	DSCAM		UPF3B		NOMO1
	AUTS2	AP2A2	MKKS	MBD1		SCRIB		GCSH	AP4S1	STAP2		LAMP2		CDK16
	RARS2	AP3B2	NSD1	MBD3		SETD5		GDI1	MGAT2	DDX10		GRIA3		CDK17
	LRAT	APAF1	RAI1	MBD4		SLC39A5		GFAP	GCH1	CARD6		OCRL		PDS5B
	GNPTAB	APBA2	L1CAM	MBD5		SLC6A3		GK	POMT2	CAMK4		PHF6		PDZD2
	SLC35C1	APBB1	NDP	MCPH1		SMARCC1		GLB1	GALC	CANX		SLC9A6		PDZD8
	SATB2	APC	PTPN11	MDGA2		SMCHD1		GLDC	ZC3H14	IFT140		FMR1		PHF12
	SNX3	APCDD1	RNF135	MECP2		SNTG1		GLI3	TTC8	HTR7		AFF2		PHF20
	NDUFS8	APH1A	RPGRIP1L	MEF2C		STAT2		GM2A	VRK1	CCDC84		SLC6A8		PRPF8
	PHC1	APLF	CEP290	MET		STXBP1		GNAS	DYNC1H1	MBTPS1		L1CAM		PINK1
	KRIT1	APOA1	NHS	MKL2		STXBP3		GNPAT	SLC12A6	EMR3		MECP2		PTK2
	ALG11	APOA2	VPS13B	MSNP1AS		TOP1		GNS	CEP152	ITGA6		RAB39B		PTK2B
	PEX5	APOA4	CACNA1C	MSR1		TOPORS		GPC3	AP4E1	FLAD1		FRMPD4		PROSAPIP1
	HESX1	APOB	FTSJ1	MTF1		TRAF7		GPI	BBS4	CRYBG3				R3HDM1
	TRMT1	APOC1	YWHAE	MTHFR		TTF2		GNPDA1	KIF7	ST3GAL6				R3HDM2
	WDR60	APOC3	PAH	MYO16		TUBA1A		GSS	IDH2	NUP214				RAP1GAP
	FH	APOE	PQBP1	NBEA		UGT2B10		PRNP	GNPTG	SERPINI1				RASGRP1
	POMGNT1	APOH	SGSH	NDNL2		USH2A		GUSB	TBC1D24	KCNU1				REV3L
	OCRL	APOM	FOXG1	NDUFA5		VAV3		HESX1	ZNF423	BLNK				RIMBP2
	LRPPRC	APP	ACSL4	NF1		WDR66		HEXA	TUBB3	MKI67				RUSC1
	NUP62	APPL1	BRAF	NIPBL		XPO5		HEXB	PMM2	GLIPR1L2				RUSC2
	PET100	AQP4	ALDH5A1	NLGN1		ZKSCAN5		HLCS	GRIN2A	TENM1				RAPGEF1
	SRCAP	AR	MED12	NLGN3		ZNF311		HMGCL	NDE1	MYH9				RAPGEF2
	COASY	ARAP3	POMGNT1	NLGN4X		ZNF451		HPD	BBS2	SLC18A2				RAPGEF4
	SCN1A	ARC	RPE65	NLGN4Y		ZNF638		HPRT1	GPR56	RUNX3				RAPGEFL1
	ZFYVE26	AREG	NIPBL	NPAS2		ZNF813		IDS	COG8	BSND				RASGRF1
	PARP1	ARFGAP1	IGF2	NRCAM		ABCA2		IDUA	TMEM231	CELSR2				ARHGAP20
	DEAF1	ARHGAP10	DMPK	NRP2		ACP2		IGF1	CDH15	TOR1AIP1				ARHGAP21
	SCAPER	ARHGAP15	UPF3B	NRXN1		ADCY5		IKBKG	CHMP1A	RBBP5				ARHGAP23
	RNASEH2A	ARHGAP23	OCRL	NRXN2		AMY2B		ITGA7	WDR81	ASAP2				ARHGAP32
	AP4M1	ARHGAP24	SATB2	NRXN3		AP3B2		JAG1	MPDU1	NEB				ARHGEF11
	C12orf57	ARHGAP39	DCX	NSD1		APAF1		KCNJ1	PIGL	GLS				ARHGEF12
	SMARCB1	ARHGAP4		NTNG1		ARHGEF10L		KCNJ11	ALDH3A2	RAD54L2				ARHGEF17
	MOCS1	ARHGEF1		NTRK1		BMP1		L1CAM	SLC46A1	SLIT2				ARHGEF4
	PAX6	ARHGEF10L		NTRK3		CACNA1D		LAMA2	SMARCE1	C5orf42				ARHGEF7
	FLNA	ARHGEF26		NXPH1		CACNA1E		LAMP2	EFTUD2	SLIT3				RHOBTB2
	NR2F1	ARHGEF3		ODF3L2		CARKD		LARGE	GFAP	HIVEP1				RICH2
	SRPX2	ARHGEF6		OPHN1		CD72		PAFAH1B1	MKS1	FILIP1				ARHGEF2
	KAT6B	ARID1A		OR1C1		CDH5		LRPPRC	COG1	INTS1				SASH1
	GLI3	ARID1B		OXTR		CEP350		MAN2B1	TSEN54	MIOS				SAPS1
	PAH	ARL1		PARK2		CHD3		MANBA	ACTG1	SNX31				SAPS2
	FKTN	ARL14		PCDH10		CHD7		MAT1A	RBBP8	UPF2				SEC14L1
	COQ4	ARMC10		PCDH19		CISH		MCCC1	IER3IP1	FIBIN				SEC16A
	PEX13	ARMC5		PCDH9		CNOT1		MCCC2	RTTN	DCDC5				SECISBP2L
	AP1S2	ARMC8		PER1		CNOT4		MCOLN1	MAP2K2	CBX5				SBF1
	GLI2	ARMC9		PIK3CG		CNST		MGAT2	MCOLN1	DTX1				SETD5
	ASAH1	ARMCX2		PITX1		COL12A1		MOGAT2	SMARCA4	NCOR2				SHANK1
	MMAA	ARMCX5		PLN		CTNNB1		MID1	CC2D1A	FRY				SHANK2
	PEX14	ARMET		POGZ		CUL5		MLYCD	GPSN2	N4BP2L2				SHANK3
	PGAP2	ARNT		PON1		DBR1		MOCS1	WDR62	HIF1A				SGIP1
	STRA6	ARNT2		PPP1R1B		DDR2		MOCS2	BCKDHA	ADAMTS17				SH3BP4
	ZNF711	ARPC3		PRKCB		DDX20		MPDU1	ERCC2	ADCY9				SLITRK5
	PRSS12	ARPC5		PSD3		DEPDC7		MT-ATP6	ERCC1	ITGA3				SRGAP3
	FKRP	ARPP21		PTCHD1		DNAH17		MT-CO1	FKRP	TLK2				SMG1
	STAMBP	ARRB1		PTEN		DNAJB9		MT-CO2	PNKP	LDLRAD4				SON
	NSUN2	ARRDC3		PTGS2		DUS1L		MT-CO3	ASXL1	CNDP2				SPARCL1
	PEX16	ARRDC4		RAB39B		EFCAB8		MT-CYB	DNMT	DNMT1				SPEG
	DPM3	ARX		RAI1		EHD2		MTHFR	CTSA	NCAN				SPHKAP
	DDC	ASAH2		RAPGEF4		EIF2B5		MT-ND5	ARFGEF2	SLC25A1				SCAF1
	NFU1	ASAP1		RBFOX1		FAM45A		MTR	DPM1	CLTCL1				SCAP
	DEPDC5	ASB1		REEP3		FBXO10		MTRR	CBS	CHEK2				SMARCA2
	SYT1	ASB13		RELN		FBXW9		MT-TE	PCNT	CACNA1I				SMARCA4
	INPP5E	ASB17		RGS7		FRYL		MT-TK	SNAP29	ALDH4A1				SMARCC2
	GLB1	ASCC3		RHOXF1		GJA10		MT-TL1	SMARCB1	CSF3R				SEC23A
	RAX	ASCC3L1		RIMS3		GLMN		MT-TS1	LARGE	DNASE2B				SAP130
	SLC25A19	ASIP		RPL10		GPR114		MT-TV	EP300	POGZ				TIAM1
	B3GALNT2	ASMT		RPS6KA2		GPR139		MYO5A	CYB5R3	RUSC1				TAOK1
	BBS5	ASPM		SATB2		GPR146		NAGLU	ALG12	AASDH				TAOK2
	PECR	ASS1		SCN1A		GPS1		NBN	CHKB	CDKAL1				TBC1D9
	MPDZ	ATF3		SCN2A		H2AFV		NLRP2	HCCS	TSGA13				TBC1D9B
	DHTKD1	ATP10A		SDC2		AC011498.1		NDP	OFD1	CUL1				TNIK
	SLC6A1	ATP10D		SEMA5A		HDLBP		NDUFS1	FANCB	TDRD1				TSC22D1
	HSPD1	ATP13A4		SETD2		HNRNPF		NDUFS2	PDHA1	CKAP2				TSPYL4
	GAMT	ATP1A1		SETD5		HSPB2		NDUFS4	RPS6KA3	SOS2				UHRF1BP1L
	FLNA	ATP1A3		SEZ6L2		HTATIP2		NDUFS7	MBTPS2	ADAMTS18				WASF1
	ARID1B	ATP1B1		SHANK1		INCENP		NDUFS8	SMS	CXorf65				WDFY3
	VRK1	ATP2A2		SHANK2		INPP5B		NDUFV1	GK	KLHL17				WDR13
	WWOX	ATP2B2		SHANK3		IRF2BPL		NEU1	TSPAN7	DVL1				WDR6
	BRAF	ATP2B2		SLC1A1		ITGB3		PNP	BCOR	ESPN				WNK1
	LRP2	ATP2B3		SLC25A12		KIAA0182		CTF2P	ATP6AP2	TMEM201				WNK2
	MGAT2	ATP6AP1		SLC38A10		KRBA1		ZNF384	MAOA	EPHA2				WWC1
	SOX11	ATP6AP2		SLC4A10		KRT80		NPC1	PORCN	EMC1				ACO2
	ATP13A2	ATP6V0D1		SLC6A4		L1TD1		NPC2	SYP	LUZP1				ACTB
	RELN	ATP6V0E1		SLC6A8		LAMB2		NSD1	SHROOM4	NIPAL3				ATF7IP
	GALT	ATP6V1A		SLC9A6		LAMC3		OAT	HUWE1	EXTL1				ABR
	ZEB2	ATP6V1C1		SLC9A9		MAP4		OCRL	ARHGEF9	NR0B2				ADNP
	TTC8	ATP6V1G2		SND1		MCAM		OPHN1	DLG3	PTAFR				AP1B1
	FLVCR2	ATP8B2		SNTG2		MEGF11		OTC	HDAC8	EPB41				AP2A1
	CYP2U1	ATP8B4		SOX5		MKI67		PAH	SLC16A2	YARS				AP2A2
	OCRL	ATRN		ST7		MSH6		PAK3	ATP7A	PHC2				AP2B1
	EHMT1	ATRNL1		STK39		MST1R		ARHGEF7	PGK1	CSMD2				AP3D1
	CDT1	ATRX		SUV420H1		MUC16		PANK2	BRWD3	CLSPN				ADD1
	SLC13A5	AUTS2		SYN1		MYBBP1A		PAX8	ZNF711	THRAP3				APC2
	ERCC6	AVPR1A		SYNE1		MYH10		PC	TIMM8A	HIVEP3				APC
	MANBA	B3GALT3		SYNGAP1		MYO7B		PODXL	RAB40AL	CCDC30				ADARB1
	PTDSS1	B3GNT2		SYT17		NAA40		PCCA	PLP1	PTPRF				ADCY1
	ARHGEF9	B3GNT6		TBC1D5		NACA		PCCB	PRPS1	PIK3R3				ADCY5
	SLC25A20	B4GALNT1		TBL1X		NLGN1		PDHA1	PAK3	TTC4				ADRBK1
	PEX1	BACE2		TBL1XR1		NOLC1		PEPD	UBE2A	DNAJC6				AGRN
	TREX1	BAG3		TBR1		NOTCH3		PEX1	NDUFA1	LPHN2				ALDOA
	KCNA2	BAIAP2		TBX1		NR4A2		PEX10	CUL4B	LPAR3				ALDOC
	KCNA2	BAIAP2L1		TDO2		NTNG1		PEX12	ZDHHC9	ZNF326				ACCN1
	RAD21	BAIAP2L2		TMLHE		OPLAH		PEX13	GPC3	RPL5				AMPH
	SZT2	BANK1		TSC1		OPRL1		PEX16	HPRT1	TAF13				APP
	HPD	BATF		TSC2		OR10Z1		PEX19	SOX3	MYBPHL				APBA1
	GNPAT	BBS5		TSPAN7		OR11L1		PEX2	IDS	SLC6A17				APBB1
	DNM1	BCAN		UBE2H		PACS2		PEX3	NSDHL	CAPZA1				APLP1
	COG5	BCAP31		UBE3A		PAEP		PEX5	ABCD1	MOV10				ALS2
	HEXB	BCAR1		UPF3B		PBRM1		PEX6	HCFC1	PDE4DIP				ANAPC1
	MED13L	BCAS4		VASH1		PCDHB4		PEX7	FLNA	DCST1				ANK1
	CDK5RAP2	BCAT1		VPS13B		PCNX		PGK1	GDI1	ASH1L				ANK2
	PCBD1	BCHE		WNK3		PDIA6		PHF6	IKBKG	INSRR				ANK3
	BCAP31	BCKDK		ZBTB20		PHF19		PLP1	DKC1	ARHGEF11				ANKRD11
	HSD17B4	BCL11A				PION		PMM2		DARC				ANKRD17
	KANK1	BCL2				PITPNM3		POMGNT1		FCGR3B				ANKRD52
	ANKRD11	BCL2A1				PLEKHA8		POMT1		PBX1				AATK
	PHF21A	BCL6				PLXDC1		POU1F1		PRRC2C				RERE
	NF1	BCL7A				PNPLA7		CTSA		KLHL20				ARVCF
	OFD1	BCL7C				POLQ		PPOX		SOAT1				ARRB1
	BPIFB6	BCORL1				PRKCA		HCRT		TPR				ARNT2
	PTF1A	BDNF				PSEN1		PRPS1		KIF14				ASH1L
	ASCL1	BEX2				PSMG4		PRSS12		CACNA1S				ATXN1
	PIGQ	BGN				PTEN		PSAP		PLEKHA6				ATN1
	ALDH18A1	BHLHE22				PTGES		MTCH1		PIK3C2B				AUTS2
	MED17	BID				PTGR1		PTCH1		NFASC				BIRC6
	SMARCA4	BIK				PTPRK		PTCH2		RASSF5				BSN
	TUBB2A	BIRC3				RBMS3		PTEN		CR1L				BZRAP1
	SUMF1	BLMH				RFX8		PTPN11		TLR5				B3GAT1
	PEX6	BLVRB				RGMA		PTS		NVL				BMPR2
	PDCD10	BMP1				RGS22		PVRL1		PRSS38				BAI1
	C2CD3	BMS1				RIMS2		ALDH18A1		OBSCN				BAI2
	CEP41	BPIL2				RNF123		QDPR		CAPN9				BCR
	NF1	BRAF				RUVBL1		RPS6KA3		TSNAX				BCAN
	HCN1	BRCA2				RYR1		SAR1B		ZP4				BPTF
	PTEN	BRCC3				SCN1A		SC5D		WDR64				BAZ2A
	SGSH	BRD1				SESN2		SCO2		CMPK2				BRD4
	SATB2	BRD2				SFPQ		SDHA		GTF3C2				CELF5
	GRIK2	BRD3				SGSM3		SGSH		NRXN1				CELSR2
	ORC1	BRP44				SH2D3C		SHH		EML6				CABIN1
	SYNE1	BRPF1				SLCO1C1		SIX3		ALMS1				CACNA1B
	ARL6	BRSK1				SP7		SLC12A1		CTNNA2				CACNA1A
	PTEN	BRSK2				SRBD1		SLC12A6		ASTL				CACNA1E
	QKI	BRWD1				SRPR		SLC17A5		CNNM3				CACNA1G
	IDUA	BSPRY				ST3GAL3		SLC25A15		SLC5A7				CACNA1I
	STXBP1	BST2				STARD9		SLC4A4		TMEM87B				CACNB1
	DNMT3A	BTBD11				STIL		SLC5A5		ZC3H6				CACNB3
	BBS1	BTBD17				STK36		SLC7A7		IL36B				CAMK2A
	IDUA	BTG1				SYNE1		SMPD1		GLI2				CAMK2B
	NSD1	BTG3				SYNRG		SMS		RIF1				CAMK2N1
	MTTP	BTN1A1				TAS2R10		SOX10		TANC1				CAMKK2
	ALG12	BTN2A1				TATDN2		SOX3		SCN2A				CALM1
	NFIX	C10orf10				TBL1XR1		SUOX		XIRP2				CAMTA1
	MFSD8	C10orf11				TEPP		SURF1		TLK1				CAMTA2
	ERCC2	C10orf116				TGM3		TAT		SLC25A12				CAMSAP1
	PDSS2	C10orf137				TIPIN		TBCE		CDCA7				CAMSAP1L1
	GUSB	C10orf54				TLK2		TCN2		TTN				CLSTN1
	HSD17B10	C10orf77				TMC4		TDGF1		AOX1				CIC
	RTEL1	C10orf90				TMPRSS2		TG		FN1				CHST2
	PEX26	C10orf95				TNKS		TGIF1		SPEG				CPE
	DARS2	C10orf99				TREH		IL10		CUL3				CPT1C
	MLYCD	C11orf1				TRIO		THRB		ITM2C				CTNNB1
	RBM28	C11orf31				TSC2		TIMM8A		KIF1A				CTNND2
	HGSNAT	C11orf41				TSNARE1		TSPAN7		ITPR1				CHN1
	GCDH	C11orf74				TSR2		TPI1		RPUSD3				CHN2
	PIGL	C12orf24				TTN		TPO		NUP210				CLCN3
	AMPD2	C12orf35				UBE3C		THPO		LSM3				CBX6
	KDM6A	C12orf41				UGGT1		TSHB		STT3B				CHD3
	ASPM	C12orf50				UIMC1		TSHR		ZNF445				CHD4
	PRRT2	C12orf68				VPS39		TTF1		LIMD1				CHD5
	TMEM67	C12orf72				VWCE		NKX2-1		CELSR3				CHD6
	HRAS	C12orf76				XIRP1		TTF2		NCKIPSD				CHD8
	KCNC1	C13orf15				YTHDC2		XPA		ALAS1				C11ORF41
	CHRNB2	C13orf16				ZBTB41		ZEB2		DNAH1				C14ORF4
	MMADHC	C14orf106				ZC3H12B		ZIC2		PHF7				C19ORF26
	CRB2	C14orf135				ZMYND8		PTHLH		KCTD6				C20ORF117
	PC	C14orf19				ZNF420		PRDX5		PTPRG				C20ORF12
	TMEM237	C14orf4				ZNF644		ABCD1		GXYLT2				CIT
	PEX12	C14ORF56				A2M		MTM1		CNTN3				CLTC
	SCN8A	C15orf62				AADACL2		KLF8		TFG				COPG
	TMEM5	C16orf58				ABI3BP		IGBP1		ALCAM				CRMP1
	GABRB3	C16orf68				AGK		NHS		CD96				CPLX1
	SCN2A	C16orf93				ANK3		PQBP1		KIAA2018				CPLX2
	SOX2	C17orf87				ATP2B4		ZNF41		PLXNA1				COBL
	ARX	C17orf97				BCORL1		ZNF81		TRH				CKB
	PEX26	C18orf19				BRD1		BCOR		PAQR9				CUL9
	SURF1	C18orf26				C18orf26		KDM5C		HPS3				CAND1
	GRIN2B	C18orf32				C2orf42		SHROOM4		SHOX2				CUX1
	KIF11	C18orf54				C6orf174		KIAA2022		PSMD2				CUX2
	CTCF	C19orf6				FAM205A		FTSJ1		EPHB3				ARPP21
	TSEN34	C19orf66				CAPN10		DLG3		DLG1				CDK5R1
	RPGRIP1L	C1GALT1				CASK		MPP3		ZNF721				CDK5R2
	ABCD4	C1orf125				CCDC14		PHF8		PSAPL1				CDKL5
	OPHN1	C1orf131				CD151		ATP6AP2		ZNF518B				CYFIP2
	ZDHHC15	C1orf173				CHRND		ARHGEF9		YTHDC1				CLASP1
	ACADM	C1orf21				CPZ		SYN1		SULT1B1				CLASP2
	CASK	C1orf52				CSMD1		SLC16A2		ADAMTS3				CKAP5
	ETFDH	C1orf54				CYP4F3		ZDHHC15		PARM1				DIDO1
	DDX3X	C1orf59				DGCR14		FANCB		SEC31A				DAPK1
	DDX3X	C1orf61				DICER1		HCCS		GRID2				DOCK3
	AR	C1orf86				DISC1		AP1S2		METTL14				DOCK4
	ARFGEF2	C1QB				DNAH11		SMC1A		MYOZ2				DOCK9
	HYLS1	C1QC				DNAH9		SRPX2		ANKRD50				DBC1
	SACS	C20orf103				DNMT3A		UBE2A		FAT4				DLC1
	AR	C20orf111				DOM3Z		ZNF674		PCDH10				DTX1
	NR1I3	C20orf94				EBAG9		BRWD3		DCHS2				DDN
	ZDHHC9	C21orf2				EFR3A		CUL4B		CBR4				DGKZ
	DYM	C21orf33				EIF2C1		PORCN		SORBS2				DAGLA
	KCNMA1	C21orf34				FBXL6		GRIA3		TLR3				DICER1
	NDUFV1	C21ORF58				FBXO18		HSD17B10		LPCAT1				DPYSL2
	DOLK	C21orf7				FEZF2		MED12		PDZD2				DPP8
	ATRX	C2orf4				FGD3		NDUFA1		ZFR				DLGAP1
	SLC6A5	C2orf42				GNAS		NXF5		NIPBL				DLGAP2
	CEP152	C3				GOLGA3		RPL15		ADAMTS6				DLGAP3
	TBC1D24	C3orf18				GPR98		UPF3B		TAF9				DLGAP4
	C12orf65	C3orf38				GRM7		ZDHHC9		ATG12				DLG2
	DCX	C3orf57				GTF2IRD1		HUWE1		SHROOM1				DLG4
	FAM111A	C3orf58				HIGD2A		PCDH19		CD14				DLG5
	MPI	C3orf72				HIST1H2AE		MAGT1		PCDHAC2				DISP2
	MCCC2	C4B				HMHA1		CASK		SH3TC2				DOPEY1
	PDHA1	C4orf41				IKBIP		MBTPS2		STK10				DOPEY2
	GJC2	C4orf45				IL20RB		NSDHL		NSD1				DCLK1
	NRXN2	C5				IQGAP3		IQSEC2		GFOD1				DUSP8
	PMM2	C5orf16				ITSN2		RAB40AL		JARID2				DCTN1
	UMPS	C5orf44				KANK1		RBM10		ALDH5A1				DNM1
	PEX19	C5orf62				KIAA0317		NAA10		HIST1H2BE				DYNC1H1
	SLC4A4	C6orf145				KIAA1432		LAS1L		HIST1H4I				DST
	ARL6	C6orf174				KIAA1462		EIF2S3		PRRC2A				DTNA
	SPTAN1	C7orf43				L3MBTL1		HCFC1		FKBPL				DMWD
	GNAO1	C7orf50				CERS6		THOC2		BTNL2				EGR1
	TMEM67	C7orf68				LCN10		CLCN4		RGL2				EML2
	FLVCR1	C8orf22				LLGL1		HDAC8		C6orf222				ENC1
	TMEM216	C8orf74				LRP1		CDH15		KIF6				ELMO2
	THRA	C9				LTBP1		RAB3GAP1		TFAP2D				EPN1
	TUBGCP6	C9orf144B				MADD		STXBP1		PAQR8				EPB41L1
	RRAS	C9orf30				MDN1		GRIN2B		RIMS1				EPB49
	FLNA	C9orf45				MMP8		UBR1		KCNQ5				EHMT1
	FRMD7	C9orf46				MPP6		LIMK1		TTK				EHMT2
	GLUL	C9orf68				MR1		SRGAP3		UFL1				EEF1A2
	ORC4	C9orf82				MTMR2		BRAF		AKD1				EEF2
	COLEC11	C9orf86				MTMR9		KRAS		LAMA4				EIF2C1
	CHD7	CA12				MYB		MAP2K1		KIAA1244				EIF2C2
	NEDD4L	CABIN1				MYH9		MAP2K2		UTRN				EIF4G1
	CEP290	CABP1				NAV2		RAF1		SYNE1				EIF4G2
	ZIC2	CACHD1				NCAPD2		SHOC2		ARID1B				EIF4G3
	GRIN2A	CACNA1A				NF1		SPRED1		AMZ1				EXTL3
	FMR1	CACNA1C				NLRX1		SOS1		TNRC18				XPO6
	TBC1D24	CACNA1D				NPFFR2		EHMT1		FBXL18				XPO7
	NFIA	CACNA1E				NR2F1		EP300		DAGLB				ELFN2
	WDR45	CACNA1F				NSUN7		HDAC4		CDCA7L				FAM115A
	TECPR2	CACNA1G				OR5AC2		KMT2D		NUPL2				FAM120A
	ROR2	CACNA1H				PHF3		KMT2B		SCRN1				FAM160A2
	NEU1	CACNA1I				PLOD3		KAT6B		NME8				FAM171B
	QARS	CACNA2D2				PPP2R1B		CDK8		YAE1D1				FAM179B
	NKX2-1	CACNA2D3				PRCP		CHD7		GLI3				FAM21A
	SNRPB	CACNB1				PTK7		DYRK1A		ABCA13				FAM5B
	HOXA1	CADM1				RFX2		MED17		POM121C				FAM65A
	GON4L	CADM2				ROS1		MED23		RUNDC3B				FAM91A1
	SLC19A3	CADM3				SCARB2		SETBP1		AKAP9				FSCN1
	GRIN2B	CADPS				SEMA4G		TCF4		PEX1				FASN
	ARHGEF6	CADPS2				SLC17A3		TCF7L2		GNB2				FOXK2
	BCL11A	CALB2				SLC22A9		YY1		MUC17				FOXO3
	GNAS	CALCA				SLC26A5		ZNF711		RELN				NCS1
	GNS	CALY				SLC30A5				C7orf60				FRY
	WDR60	CAMK1G				SLC6A1				SLC13A1				GABBR1
	WWOX	CAMK2G				SLC6A13				SND1				GABBR2
	ARX	CAMK2N2				SLFN5				CCDC136				GTF3C1
	SLC6A8	CAMP				SMC3				TAS2R3				GTF3C2
	PHGDH	CAPN10				SNAPC5				CLCN1				GRLF1
	PEX26	CARHSP1				SNRK				SSPO				GRIN1
	MTF1	CARKD				SORCS1				NOS3				GRIN2A
	ALDH5A1	CARM1				SPAG17				MLL3				GRIN2B
	PEX7	CART				SRGAP3				TNKS				GRIK3
	NDUFS4	CASK				SUPT16H				XKR6				GRIK5
	COL4A1	CASP3				SUV420H1				XPO7				GRM4
	POMT1	CASP7				SV2B				FAM160B2				GRM5
	NRXN3	CBLN2				TAS2R3				PTK2B				GLUL
	GLB1	CBLN4				TCF7L1				ESCO2				GPAM
	ARX	CBS				TECTA				KIF13B				GSK3B
	CEP63	CBX4				TET1				TEX15				GPM6A
	EEF1B2	CCBL2				TMEM85				WRN				GBF1
	KIAA0226	CCDC102B				TMEM8A				ANK1				GAS7
	DHFR	CCDC136				TPK1				TTPA				GNAO1
	CA2	CCDC14				TROAP				XKR9				GNAL
	GCSH	CCDC148				TRPM7				PI15				GNAZ
	RAD51	CCDC18				TRRAP				FABP4				GNB1
	GALC	CCDC25				TUBGCP5				KIAA1429				HSP90AB1
	RNASEH2B	CCDC34				USP46				YWHAZ				HERC1
	ACOX1	CCDC50				WDR4				TRHR				HERC2
	CACNA1A	CCDC57				ZNF213				SQLE				HNRNPUL1
	CDH15	CCDC63				ZNF335				ASAP1				HK1
	MIR17HG	CCDC64				ZNF642				PUF60				HDLBP
	DHCR24	CCDC69				ACACB				EPPK1				HDAC4
	ZBTB16	CCDC90A				ANK2				TONSL				HDAC5
	GFAP	CCDC90B				ANO5				RANBP6				HIPK1
	HESX1	CCDC92				ATP10D				HAUS6				HIPK2
	MAP2K1	CCDC93				ATP1B1				ACO1				HIPK3
	L1CAM	CCL17				BCL11A				PAX5				HCFC1
	TBCE	CCL2				CACNA2D3				PRUNE2				HIVEP1
	SLC25A22	CCL20				CBX4				VPS13A				HIVEP2
	NRXN1	CCL22				CSTF2T				COL15A1				HIVEP3
	SOX3	CCL25				CTTNBP2				FSD1L				HTT
	TIMM8A	CCL28				DIP2A				ACTL7B				HCN2
	DCAF17	CCNB1IP1				DIP2C				PTPN3				APOE
	MTRR	CCND2				DLL1				COL27A1				SRCIN1
	RALGDS	CCNJ				DST				PHF19				PDE4DIP
	ALG13	CCNL1				ECM2				LHX6				IDS
	ALG13	CCPG1				EFCAB5				C9orf114				IGSF9B
	TTC8	CCR1				FAM91A1				POMT1				IPO13
	LAMA2	CCT8				FLG				EGFL7				IPO4
	PLP1	CD14				GALNTL4				MAMDC4				IPO5
	PTS	CD151				GIMAP8				EXD3				ITPR1
	KLF8	CD160				KDM6B				ARRDC1				INPP4A
	USP9X	CD163L1				KIAA0232				ZMYND11				IRS2
	USP9X	CD24				LMTK3				ZEB1				INTS1
	HPD	CD247				LRP2				EPC1				ITSN1
	SLC6A17	CD300LG				MED13L				MAPK8				JPH3
	DNMT3B	CD38				MFRP				PSAP				JPH4
	FMR1	CD44				MLL5				LIPK				KALRN
	SMC3	CD52				MTHFS				ANKRD22				KLHL22
	GJC2	CD69				NCKAP1				ACTA2				KNDC1
	SMOC1	CD72				NFIA				MYOF				KIF1A
	GDI1	CD74				NR3C2				TM9SF3				KIF1B
	DNA2	CD8A				NRXN1				POLL				KIF21A
	LRP2	CD9				NUAK1				PDCD11				KIF21B
	ZNF526	CD96				TM4SF19				ACSL5				KIF3C
	ESCO2	CD99				PAX5				FAM160B1				KIF5A
	CCBE1	CDC14B				PCDHA13				CUZD1				KIF5C
	RAPSN	CDC25A				PCOLCE				MUC6				KIFC2
	POGZ	CDC25B				PHF2				PDE3B				KLC1
	TUBA1A	CDC40				RABGGTA				IGSF22				LPHN1
	ADSL	CDC42BPB				RAD21L1				KIF18A				LPHN3
	COG1	CDCA7L				RIMS1				ACCSL				LMTK2
	GNAS	CDH10				CTPS2				LRP4				LMTK3
	ELOVL4	CDH11				SCUBE2				PTPRJ				LLGL1
	NDST1	CDH12				SLC25A39				SMTNL1				LINGO1
	FMN2	CDH17				SPATA13				ZDHHC5				LRRC41
	TUBB	CDH22				TBC1D23				FADS2				LRRC4B
	ZC4H2	CDH5				THSD7A				SYVN1				LRRC68
	CLN6	CDH6				TRIM17				SPDYC				LRRC7
	SHANK3	CDH8				TRIP12				PCNXL3				LRRC8B
	PDHA1	CDH9				TROVE2				NUMA1				LRRN2
	ALS2	CDHR5				UBN2				ARAP1				LARS2
	ERCC6	CDK14				UNC80				GDPD5				LARGE
	SHH	CDK5R1				VCP				CAPN5				LPIN2
	ARX	CDKL5				WDFY3				CLNS1A				LHFPL4
	TMEM67	CDKN1A				ZFYVE26				DLG2				LRP3
	ADRA2B	CDKN2C				ZMYND11				MAML2				LRP8
	BOLA3	CDON				ZNF594				CEP164				LRP1
	TAT	CDS1				AARSD1				PHLDB1				KDM4B
	TTC19	CDX2				ABI2				HSPA8				KDM5C
	PURA	CEBPD				ACRBP				FOXRED1				KDM6B
	GJC2	CECR1				ACTN4				IQSEC3				MFHAS1
	SLC12A5	CELA1				ADAM18				CD163L1				MAN2A2
	GRIN2B	CELF5				ADAMTS7				CD163				MGAT5B
	ATP7A	CELSR3				AGAP2				SLCO1B7				MMP24
	AASS	CENPC1				AK1				BCAT1				MTOR
	MED23	CEP290				ZMAT5				STK38L				MED13
	ATP1A3	CEP350				ALMS1				ARID2				MED13L
	SLC22A5	CEP57				AP3D1				FAM186B				MED14
	AIFM1	CES1				ARHGAP21				KRT82				MED16
	KCNJ11	CETP				ASB14				ZC3H10				MAGED1
	PSPH	CFH				B9D1				SMARCC2				MAGI2
	GLB1	CFHR1				BAI3				XPOT				MTSS1L
	UBE2A	CFLAR				BCHE				MDM1				MBD5
	CEP135	CHCHD10				BEST3				CEP290				MICAL2
	ISPD	CHD1				BIRC6				EPYC				MAST1
	KRAS	CHD2				C14orf129				IKBIP				MAST2
	CACNB4	CHD3				CATSPERG				NUP37				MAST4
	MKS1	CHD5				HEATR8				ALDH1L2				MACF1
	PEX3	CHD7				C2CD3				TCP11L2				MAP1A
	PAX6	CHD8				KCTD20				ANAPC5				MAP1B
	KIF5C	CHGA				C9orf86				PSPC1				MAP2
	EXOSC3	CHGB				CACNA1S				STARD13				MAP4
	AUH	CHI3L1				CAD				NBEA				MIB1
	PEX2	CHI3L2				CAMSAP1				HTR2A				MINK1
	DBT	CHKB				CGNL1				ITM2B				MAPK1
	BCKDHA	CHN1				CIT				INTS6				MAPK4
	SLC35A1	CHN2				CLCA2				NALCN				MAPK8IP1
	QDPR	CHRD				CLCN7				TINF2				MAPK8IP3
	KMT2D	CHRM1				CNGB1				NYNRIN				MAPKBP1
	UBR1	CHRM5				CNOT6				C14orf28				MAP3K12
	GLI3	CHRNA4				CNPY2				KLHDC1				MAP4K4
	ALG6	CHRNA7				COLEC12				ESR2				MBP
	HDAC8	CHRNB2				CPA4				PLEKHH1				MYT1L
	YY1	CHRND				CSAD				ACTN1				MLL
	SLC17A5	CHST10				CSTA				DICER1				MLL2
	ARID1A	CHST12				CYP4F12				WARS				MLL3
	MED12	CHST5				CYP4Z1				HSP90AA1				MLL5
	ACBD6	CIAO1				DCAF11				AKT1				MEF2D
	SCN1B	CIB4				DCAF4L2				TRPM1				MYO5A
	HIST3H3	CIITA				DCAF5				RYR3				MYO10
	RAI1	CINP				DDB1				DLL4				MYO16
	CD96	CIRBP				DENND5B				INO80				MYO18A
	CSNK1G1	CISH				DHX9				OIP5				MPRIP
	TUBB3	CITED2				GORASP2				SPTBN5				MYH10
	SETD5	CKB				DNAH10				DUOXA2				MTMR4
	DDHD2	CKLF				DNAH2				DUOXA1				NELF
	KCNJ6	CKMT1A				TRDMT1				GNB5				NCAM1
	TUBGCP4	CLCF1				DUSP14				VPS13C				NEDD4
	KIRREL3	CLCN3				EFCAB6				CLPX				NEURL
	CHRNA2	CLCN4				EGFR				UACA				NEURL4
	PIK3R2	CLDN10				EIF3G				NR2E3				NRXN1
	CACNB4	CLDN23				EIF4A1				CHSY1				NRXN2
	TMEM165	CLDN5				ELOVL1				RHBDF1				NRXN3
	CASK	CLEC16A				EMID2				MPG				NBEA
	FLNA	CLEC18C				EMR1				SOLH				NCAN
	FAM126A	CLEC2B				ENPP2				DNASE1L2				NCDN
	ELP2	CLIC1				EP400				CDIP1				NF1
	MOCS2	CLIC3				EPHA1				GRIN2A				NRGN
	SYNGAP1	CLIC4				EPHX2				CLEC16A				NLGN2
	PTEN	CLIP1				ERP44				MYH11				NLGN3
	ATRX	CLIP4				FAM120B				EEF2K				NAV1
	SLC12A6	CLNK				FAM129B				COG7				NAV2
	SLC35A2	CLTB				FAM177B				TMEM219				NAV3
	ABCD1	CLTC				FBN1				TBC1D10B				NPAS2
	SMS	CLU				FCGBP				FBXL19				NGEF
	FTCD	CLYBL				G3BP2				PYCARD				NPTXR
	KCNQ2	CMPK2				GABRB3				AKTIP				NTRK2
	ASPA	CMTM3				GALNT9				CDH5				NTRK3
	EP300	CMTM7				GCN1L1				CES4A				NISCH
	UPF3B	CNDP1				GLRA2				DPEP2				NFIC
	SAMHD1	CNGA3				GOLGA4				SLC7A6				NFIX
	STX1B	CNIH3				GPRASP1				PMFBP1				NSD1
	PEX3	CNKSR2				GTF3C1				CLEC3A				NCOR1
	GABRA1	CNN3				GYPE				TAF1C				NCOR2
	PPT1	CNNM1				HDAC9				COX4I1				NCOA1
	SLC9A6	CNOT1				HERC1				FBXO31				NCOA2
	CENPJ	CNOT3				PPIP5K2				C17orf97				NCOA6
	NAA10	CNOT4				HMGXB3				SGSM2				NRIP1
	MICU1	CNOT6L				HNRNPUL1				ALOX15				NR2F1
	NDUFS1	CNPY3				HRH2				NLRP1				NUP98
	AARS	CNR1				HSD3B1				FBXO39				ODZ2
	EPG5	CNST				HSPA4				ARHGEF15				ODZ3
	ADK	CNTFR				ICA1				DNAH9				ODZ4
	SETBP1	CNTN4				IFIH1				NOS2				OLFM1
	KRAS	CNTNAP2				IFNA4				TNFAIP1				OXR1
	AP4B1	COBLL1				IKBKAP				MYO18A				OGDH
	CLP1	COG4				ISY1				TP53I13				PAK6
	MAGI2	COL12A1				ITGA7				GIT1				PTCH1
	ETFA	COL15A1				ITPR1				SSH2				PEG3
	CHMP1A	COL20A1				JUP				SRCIN1				PCNX
	COQ5	COL24A1				KCNC1				ERBB2				PCNXL2
	CBS	COL25A1				KIAA0240				KRT25				PCNXL3
	PEX12	COL4A1				PPP1R26				KRT20				PER1
	PIGA	COL6A1				KIAA1324				KRT15				PPARGC1A
	NIPBL	COL7A1				C1orf222				EFTUD2				PHACTR1
	BRAF	COMMD2				KIF18A				SP2				PTEN
	KCNK9	COMMD4				KIRREL2				SPAG9				PI4KA
	SIK1	COMMD6				LAMB3				CA10				PIGQ
	CA8	COMT				LIX1				BZRAP1				PITPNM1
	ELAC2	COPG				LPHN2				MRC2				PITPNM2
	FKRP	COPG2				LRRC31				TANC2				PREX1
	TWIST1	CORO6				LRRC40				KCNH6				PREX2
	SYNE1	CORT				LVRN				CCDC47				PIP5K1C
	OBSL1	COX19				LZTR1				SLC9A3R1				PDE2A
	SMARCA2	COX4NB				MAPK13				LLGL2				PDE4B
	FLNA	COX6A2				MBNL1				TNRC6C				PDE8B
	RARB	COX7A1				MCOLN3				CBX8				PFKM
	RARB	CP				MPO				BAIAP2				PACS1
	MMAB	CPA1				MUC17				MYADML2				PACS2
	RAB39B	CPA2				MUC2				FN3KRP				PGM2L1
	MTHFR	CPEB2				MUC4				SMAD7				PIKFYVE
	HMGCL	CPLX1				MUC5B				ZNF532				PLCB1
	ERCC6	CPLX2				MYO9B				ZNF407				PLCH2
	NAGLU	CPNE3				NCOR1				AP3D1				PLD3
	WDR73	CPSF1				NEB				ZNF77				PHYHIP
	PAX6	CPZ				NUP133				TBXA2R				PCLO
	PEX10	CR2				OR52E6				SAFB2				PKP4
	TWIST1	CREBBP				OR5M9				EMR1				LPPR4
	ARSB	CRH				PAFAH1B2				EVI5L				PSD
	PCGF2	CRHR1				PAOX				ADAMTS10				PHLDB1
	RMND1	CROCC				PDGFD				ZNF426				PLXNA1
	ROR2	CRY1				PDLIM1				FARSA				PLXNA2
	PEPD	CRYBA1				PEX5L				IER2				PLXNA4
	NGLY1	CRYM				PFKM				ILVBL				PLXNB1
	SC5D	CRYZ				PIK3R2				WIZ				PLXND1
	ALMS1	CSDA				PLD5				HAUS8				PKD1
	GATAD2B	CSDC2				PLEKHA4				GTPBP3				POLR2A
	PEX10	CSDE1				PM20D1				UNC13A				KCNT1
	KCNT1	CSEN				POU3F4				KXD1				KCNMA1
	GABRB3	CSMD1				PPRC1				ZNF536				KCNQ2
	MECP2	CSMD2				PRAMEF12				ZNF607				KCNQ3
	FAR1	CSMD3				PROS1				MED29				KCNB1
	NDUFS7	CSNK1G1				PTPRM				SHKBP1				KCND2
	CYC1	CSRP2				PXDN				AXL				KCNC3
	P4HB	CST3				PYHIN1				ERF				KCNA2
	ANKH	CST5				RBM27				CIC				KCNH1
	PEX6	CST9				RDH8				MARK4				KCNH3
	WDR45B	CSTA				RETN				ALDH16A1				KCNH7
	TRIM32	CSTF2T				RFWD3				TSKS				PJA2
	ACO2	CTBP1				RHOT2				SHANK1				PRICKLE2
	GNPTG	CTF1				RIC8A				LENG1				PRR12
	MECP2	CTH				RNPEPL1				BRSK1				PSAP
	RGS7	CTNNA2				RPL21				ZNF551				PRKCB
	PGK1	CTNNA3				RPS6KB2				ZBTB45				PRKCE
	NAGA	CTNNAL1				SBF2				CHMP2A				PRKCG
	ACY1	CTNNB1				SDHA				MGME1				PRKACB
	GTPBP3	CTNND2				SEC24D				ZNF133				PPP1R9B
	PTCHD1	CTSA				SF1				ABHD12				PPM1E
	ACSL4	CTSD				PNISR				DUSP15				PPP2R1A
	MED12	CTSH				SH3RF3				ASXL1				PPP2R2C
	DPAGT1	CTSZ				SLC25A29				SNTA1				PPP2R5B
	AGTR2	CTTNBP2				SLC2A10				MYH7B				PPP3CA
	CC2D2A	CUBN				SLC4A2				FAM83C				PTPN11
	LARGE	CUEDC2				SLC5A1				EPB41L1				PTPN5
	ZBTB40	CUL3				SMAD2				TGM2				PTPRD
	SLC16A2	CUL5				SND1				SULF2				PTPRF
	HSD17B4	CUX1				SNX5				DPM1				PTPRG
	HPRT1	CX3CR1				SPANXD				TSHZ2				PTPRJ
	GLI3	CXCL1				SRCAP				SLMO2				PTPRN2
	KCNH5	CXCL10				STK11				C20orf197				PTPRS
	ASXL3	CXCL16				STK19				GTPBP5				PTPRT
	KCTD7	CXCL2				SWAP70				ADAMTS1				PPFIA3
	DAG1	CXCR3				TANC2				URB1				PLP1
	KCNT1	CXCR4				TBC1D2B				IFNAR2				PCDH1
	ALG13	CXCR7				TEKT1				SON				PCDH10
	ABCB7	CYB5D2				THBS3				ITSN1				PCDH7
	CTC1	CYBA				TMEM178				TSPEAR				PCDH9
	FAH	CYBASC3				TMEM41A				COL6A2				PCDHAC2
	CEP290	CYBB				TOP3B				PCNT				PCDHA4
	SMC1A	CYFIP1				TRIM6				CCT8L2				PCDHGA12
	CENPJ	CYGB				TRPV5				MIF				PUM1
	CDON	CYP11A1				TXNDC5				CABIN1				PUM2
	LAMA1	CYP11B1				UPF3A				MYO18B				QKI
	FUCA1	CYP1A2				USP24				TTC28				RPH3A
	IDS	CYP1B1				UTP20				EIF4ENIF1				RALGDS
	TGIF1	CYP20A1				VNN1				APOL5				RHOB
	PEX5	CYP2C8				VPS18				EP300				RELN
	PHF6	CYP2E1				VPS4A				CERK				RPRD2
	KIF1A	CYP3A4				WBSCR17				ARSE				RGS7BP
	FAM20C	CYP3A5				WDR55				TLR7				RPTOR
	RAF1	CYP3A7				ZNF33A				DMD				RTN1
	SRD5A3	CYP4F3				ZNF366				TSPYL2				RTN3
	IARS2	CYR61				ZNF404				HUWE1				RTN4
	CAPN10	CYTH3				ZNF445				NAP1L2				RTN4R
	MID1	CYTH4				ZNF860				MAGT1				RC3H1
	NRXN1	D4S234E				ZNF99				NXF3				RC3H2
	VLDLR	DAB1								ACSL4				RYR2
	MEF2C	DAB2								HTATSF1				SALL2
	SOBP	DACH1												SEZ6L2
	ZNF599	DAG1												SETX
	NLGN4X	DAK												2021-09-03
	ALDH7A1	DAPK1												2021-09-05
	TUBB4A	DAPPER1												SRRM2
	POMT2	DARS												STK25
	ZMYM6	DBC1												SPRN
	CC2D2A	DBH												SIPA1L1
	ERCC6L2	DBNDD1												SIPA1L2
	CEP57	DBNDD2												SIPA1L3
	IFT172	DBNL												UBR5
	NLGN3	DBR1												PLEC
	IRX5	DCAF4												USP32
	KIF7	DCC												SOBP
	GAD1	DCLK1												SGSM2
	MAPK10	DCTN5												SCN8A
	OTX2	DCX												SCN2A
	UQCRQ	DDC												SLC1A2
	ERCC6	DDI2												SLC12A5
	DIP2B	DDIT4												SLC12A6
	KIF7	DDR1												SLC17A7
	SDHAF1	DDR2												SLC22A17
	FIG4	DDX19A												SLC24A2
	MAN2B1	DDX19B												SLC25A23
	RAD51C	DDX20												CELSR3
	FOXG1	DDX3X												SLC4A3
	CCNA2	DDX60												SLC4A4
	ADNP	DECR1												SLC4A8
	PEX2	DEFB103A												SLC6A1
	NDUFAF2	DEFB105A												SLC6A17
	MECP2	DEFB105B												SLC8A1
	IGBP1	DEFB106A												SLC8A2
	GCH1	DEFB109												SORBS2
	LIG4	DEFB4												SORT1
	COA5	DENND2D												SORL1
	KCNH1	DENND3												ARHGAP33
	GNAS	DENND5A												SYNE1
	ARID1B	DENR												SPTAN1
	IFIH1	DEPDC7												SPTB
	SIX3	DET1												SPTBN1
	CHRNA4	DFFA												SPTBN2
	PCDH19	DFNA5												SPEN
	MKS1	DGCR14												SPAG9
	PLP1	DGCR2												SMPD3
	GNPTAB	DGCR8												SPIRE1
	HEXA	DGCR9												SPRED1
	C5orf42	DHCR7												SAMD4B
	SCO2	DHFR												SREBF2
	LARGE	DHRS11												STOX2
	MAF	DHRS3												STRN4
	ERCC2	DHRS4L1												SUPT6H
	RAPSN	DHRS7B												SYMPK
	NALCN	DHRS9												SYN1
	WDPCP	DIAPH1												SYNGAP1
	CACNB4	DICER1												SV2A
	FREM1	DIP2A												SV2B
	CKAP2L	DIP2C												SYNGR1
	ATP1A3	DIRAS1												SYNJ1
	PEX14	DISC1												SYNPO
	UBE3A	DISC2												SNAP25
	POLR3B	DIXDC1												SNAP91
	NF1	DKFZp761E198												SYT1
	POMT2	DLG3												SYT7
	STT3A	DLG4												SNPH
	UBE3B	DLL1												STXBP1
	PTEN	DLX1												STXBP5
	AP4S1	DLX2												TLN2
	COX10	DLX5												TNKS
	PEX2	DLX6												TTBK1
	ALG3	DMAP1												TTBK2
	SLC17A5	DMD												TSHZ1
	KIF2A	DMPK												TNS3
	NDE1	DMT1												TSPAN7
	KANSL1	DMTF1												TTC3
	ALDH1A3	DMXL2												TTC7B
	THAP1	DNAH11												TANC2
	SOS1	DNAH17												TRIP12
	COX14	DNAH5												THRA
	TSPAN7	DNAH7												TEF
	CHD7	DNAH9												TRAPPC10
	CASP2	DNAJB1												TRAK1
	MBD5	DNAJB7												TRAK2
	GCH1	DNAJB9												TCF20
	CUL4B	DNAJC10												TCF25
	TMCO1	DNAJC18												TCF4
	AKT3	DNER												TLE3
	PEX19	DNM1L												TRRAP
	FOLR1	DNMBP												TRPC4AP
	ASAH1	DNMT2												TRPM3
	TRIO	DNMT3A												TMEM132A
	ASH1L	DOC2A												TMEM151A
	SDHA	DOCK1												TMEM151B
	GRIA3	DOCK3												TMEM63B
	PHIP	DOCK4												TMEM8B
	ERCC5	DOM3Z												TNPO2
	TSC2	DPP3												TNRC18
	HSD17B10	DPP4												TNRC6B
	TUFM	DPP6												TRIM2
	GRIN1	DPYD												TRIM3
	NF1	DPYSL2												TRIM32
	PIGT	DPYSL3												TRIM37
	SPG11	DRD1												TRIM9
	HPRT1	DRD2												TRIO
	PAK3	DRD3												TRO
	CSPP1	DRD4												TMOD2
	EMX2	DRD5												TULP4
	LIG4	DRP2												TSC2
	ALG2	DSC1												TPPP
	PAX6	DSC2												TTLL7
	TACO1	DSCR5												TUBB3
	TUBB3	DST												TUBB4
	CCND2	DTNA												TTYH1
	SOX2	DUB4												TTYH3
	PAX6	DUS1L												YWHAG
	STXBP1	DUSP15												TNK2
	ALDH4A1	DUSP26												UBQLN1
	CHRNA2	DUSP3												UBQLN2
	TBCE	DUSP4												UQCRC1
	AFG3L2	DUSP5												UBAP2L
	CTDP1	DUSP7												UBR3
	MAN1B1	DUSP8												UBE3B
	LONP1	DYNC1I1												UBE3C
	ACAD9	DYNLRB1												USP22
	SPR	DYNLT1												USP34
	GABBR2	DYNLT3												USP5
	POMT1	DYRK1A												USP9X
	CNKSR2	DYRK3												UBE2O
	ATIC	EAF1												UBA1
	AP4E1	EBAG9												UNC13A
	ESCO2	ECE2												UNC13C
	NDUFS4	ECGF1												UNC5A
	ERMARD	ECM1												ULK1
	KPTN	ECM2												ULK2
	CPS1	EDEM1												AKT3
	CHRNB2	EEF1E1												SKI
	GLB1	EEF2K												VPS13D
	DYRK1A	EEPD1												VPS41
	HSPD1	EFCAB5												VAMP2
	PREPL	EFCAB7												ZER1
	DECR1	EFCAB8												ZC3H4
	POMGNT2	EFCBP1												ZC3H7B
	TM4SF20	EFEMP1												ZEB2
	COL4A3BP	EFNA1												ZFR
	GNAS	EFR3A												ZFHX2
	LAMB1	EHBP1												ZFP106
	PTF1A	EHD2												ZNF238
	BCKDHB	EHD4												ZNF365
	TAZ	EHMT1												ZNF462
	MTR	EIF1AY												ZNF521
	MYCN	EIF2AK3												ZNF536
	FTSJ1	EIF2C1												ZNF704
	GBA2	EIF2S2												ZNF827
	IL1RAPL1	EIF3A												ZCCHC14
	ST3GAL5	EIF3G												ZFYVE1
	SRGAP3	EIF3K												ZMIZ1
	KCNJ10	EIF4E												ZMIZ2
	SHH	EIF4G1												ZNFX1
	COG4	EIF5												ZHX3
	TUBA1A	ELAVL1												ZYG11B
	MLC1	ELAVL4												CALM3
	RYR3	ELK1												PCDHGC3
	ACSL4	ELL
	TRAPPC11	ELMOD1
	PTEN	ELMOD3
	HIBCH	ELN
	SCO1	ELOVL5
	CACNB4	EMP1
	SHANK2	EMP3
	IDUA	EMX1
	L2HGDH	EN2
	SETBP1	ENO2
	SMPD1	ENOSF1
	RAB3GAP2	ENPP2
	LBR	ENTPD3
	MTOR	EP300
	SOX3	EPC1
	ALDH3A2	EPHA3
	TUBB2B	EPHA5
	RPGRIP1L	EPHB2
	STT3B	EPHB6
	CLPB	EPHX1
	DMD	EPN3
	RBM10	ERBB4
	EFTUD2	ERC1
	FASN	ERGIC3
	POLR3B	ERV3
	APTX	ESPN
	MCCC1	ESR1
	PEX16	ESR2
	PHGDH	ESRRA
	ZCCHC8	ESRRB
	KDM6B	ESRRG
	LINS	ESTRRA
	DLD	ETFB
	PAX8	ETS2
	PSPH	EVL
	PTEN	EWSR1
	TRAPPC9	EXOC4
	CTNNB1	EXOG
	ZNF713	EXOSC6
	KDM5C	EXT1
	CACNA1G	EXT2
	PEX1	EXTL2
	TSC1	EYA2
	PNKP	EZR
	ALG13	F12
	SYN1	F13A1
	L1CAM	F13B
	MKKS	F2
	CCDC22	FAF2
	SKI	FAIM
	DCHS1	FAIM2
	SURF1	FAM100A
	PEX1	FAM101B
	PHOX2B	FAM102A
	PLA2G6	FAM102B
	BRWD3	FAM107A
	WDR62	FAM120AOS
	MYT1L	FAM123C
	PEX10	FAM124A
	PPP2R5D	FAM129B
	B9D1	FAM130A2
	ERCC8	FAM133B
	COL4A2	FAM134B
	NPC1	FAM153B
	FLNA	FAM174B
	DPM1	FAM185A
	DLG3	FAM189A2
	GALE	FAM190A
	GLI3	FAM3C
	MMACHC	FAM43A
	BBS2	FAM45A
	APOPT1	FAM46A
	FBXL4	FAM46C
	TUSC3	FAM63B
	TSEN2	FAM65B
	SNIP1	FAM73B
	MAP2K2	FAM81A
	CAPRIN1	FAM82A1
	TAF2	FAM84A
	RAB23	FAM89A
	POLG	FAM89B
	RNASET2	FAM8A1
	MGP	FAM91A1
	PLA2G6	FAM96A
	ERCC2	FAR2
	DOCK7	FAS
	AIMP1	FAT1
	HDAC4	FBLN2
	CRBN	FBRS
	FMR1	FBXL15
	PEX26	FBXL19
	SYNGAP1	FBXL5
	ROGDI	FBXL6
	ERCC3	FBXO10
	NRAS	FBXO18
	POMT1	FBXO24
	DLD	FBXO31
	TSHB	FBXO33
	COX15	FBXW12
	KDM5A	FBXW9
	GTF2H5	FCER1G
	HCFC1	FCGBP
	RNF168	FCN3
	CEP83	FCRL4
	SHH	FCRL6
	ITPR1	FDFT1
	WAC	FES
	CHD8	FEZF1
	HNRNPU	FEZF2
	ATP8A2	FGB
	BTD	FGD1
	SYP	FGD3
	UROC1	FGD6
	IVD	FGF10
	SIL1	FGF12
	SOX5	FGF22
	FKTN	FGF9
	BBS7	FGFBP2
	ETHE1	FGFRL1
	CCDC8	FGG
	ATM	FHAD1
	TMEM70	FHIT
	MECP2	FHL2
	PHOX2B	FILIP1
	KCTD7	FKBP8
	FOXP1	FKSG83
	CHD7	FLG
	DHCR7	FLJ10178
	PNKP	FLJ12825
	ITPR1	FLJ20054
	LARP7	FLJ20647
	KMT2A	FLJ21657
	CYB5R3	FLJ30596
	KCNJ11	FLJ30834
	KCNJ11	FLJ32363
	CRADD	FLJ37440
	PHF8	FLJ38773
	ARSE	FLJ39822
	GRM1	FLJ40296
	STIL	FLJ46156
	PIGN	FLNC
	DARS	FLOT2
	SRPX2	FLRT3
	FKTN	FMR1
	CHD2	FN1
	PTCH1	FNDC3B
	ERCC1	FNDC4
	PEX5	FNDC5
	MUT	FNIP1
	PSAT1	FNTA
	TMEM67	FOXG1
	GRIN2A	FOXO1
	PACS1	FOXO3
	SHH	FOXP1
	GSPT2	FOXP2
	RNF113A	FREM3
	PPP2R1A	FREQ
	ADAR	FRK
	ADAR	FRMD5
	KIF4A	FRMPD2
	MAOA	FRMPD4
	BBS12	FRYL
	GABRA1	FSD1
	SMARCA4	FSTL5
	AFF4	FTHL11
	NPC2	FTHL3
	SLC9A9	FTL
	NDUFS1	FTSJ1
	CIC	FUK
	CACNA1H	FUS
	ST3GAL3	FUT4
	KCNQ2	FXR1
	CLCN4	FXYD2
	MAB21L2	FYN
	MAB21L2	FYTTD1
	ATP6AP2	G1P3
	CEP152	G3BP2
	PRMT9	GAB1
	PEX7	GABPB1
	ADCK3	GABRA1
	TTI2	GABRA2
	FIG4	GABRA3
	BLM	GABRA4
	TMEM135	GABRA5
	NKX2-1	GABRB1
	AMT	GABRB2
	CUL7	GABRB3
	CTSD	GABRD
	RPGRIP1L	GABRE
	SCN1B	GABRG1
	RAB3GAP1	GABRG2
	SLC2A1	GABRG3
	NFIX	GABRP
	PTCH1	GABRQ
	ATP6V1B2	GAD1
	PQBP1	GAD2
	MCPH1	GADD45B
	KIAA2022	GADD45G
	NUBPL	GAK
	EZH2	GALC
	TK2	GALNT12
	ETFB	GALNTL4
	IFIH1	GAMT
	ORC6	GAS1
	PDHA1	GAS2
	ENTPD1	GAS8
	ERCC1	GATA3
	CC2D1A	GBE1
	UBR7	GBF1
	FKTN	GBP1
	GM2A	GBP2
	MCOLN1	GBP4
	PEX7	GBP5
	DYM	GBP6
	TRIM37	GC
	DMD	GCA
	RANBP2	GCET2
	SCRIB	GCH1
	PGAP3	GCLC
	HIST1H4B	GCNT1
	PCCB	GDI1
	FOXP3	GEM
	COX6B1	GEMIN4
	PUF60	GFAP
	SMARCB1	GFM1
	TBC1D24	GFOD1
	VIP	GFOD2
	SUCLG1	GFRA2
	PAX6	GGT7
	INPP4A	GHSR
	PAK3	GIMAP6
	SLC31A1	GIMAP8
	CSTB	GIT2
	TH	GJA10
	MAGT1	GLDC
	POMGNT1	GLIS3
	RAD50	GLMN
	RNASEH2C	GLO1
	WNT4	GLRA2
	PYCR2	GLRA3
	COX10	GLRB
	RTTN	GLRX
	IGF1	GLRX3
	SNX14	GLS2
	NSD1	GLUD1
	FBXO25	GLUD2
	GATM	GLULD1
	AHDC1	GLYAT
	DDOST	GMFG
	RAB18	GNA11
	NDUFS4	GNA12
	PAX6	GNA13
	ANKH	GNA15
	CDKL5	GNAS
	KCNB1	GNB1L
	PSAP	GNB2
	GMPPA	GNB4
	EEF1A2	GNG2
	TPP1	GNL3L
	ZBTB20	GNLY
	CASK	GNPDA2
	CEP290	GNPTAB
	EOMES	GNRHR
	CISD2	GOLGA3
	SCN8A	GOLGA6L4
	DDX11	GOLGA8B
	TSEN54	GOLGA8E
	KAT6B	GON4L
	FOXRED1	GOT2
	GALNS	GPD2
	HCFC1	GPM6B
	COG8	GPN3
	UQCRB	GPNMB
	CLN8	GPR114
	SHANK1	GPR139
	DMD	GPR146
	TIMM8A	GPR155
	NDUFA1	GPR173
	ASXL1	GPR175
	TBR1	GPR50
	CLN5	GPR56
	DYNC1H1	GPR62
	DCX	GPR68
	CREBBP	GPR83
	TSC2	GPR98
	EIF2AK3	GPRASP1
	ACTG1	GPRASP2
	CLN6	GPRIN3
	AIFM1	GPS1
	PAH	GPX1
	PSAT1	GPX3
	ZMYND11	GPX8
	STAT2	GREB1L
	RIN2	GRIA1
	HACE1	GRIA2
	KIAA0586	GRIA3
	MMP21	GRIK2
	PRMT7	GRIK5
	SCN3A	GRIN1
	TUBB	GRIN2A
	SCYL1	GRIN2B
	SLC39A8	GRIN3A
	GMNN	GRIN3B
	TAF1	GRINL1A
	DKC1	GRIP1
	TERT	GRIPAP1
	PARN	GRK4
	TINF2	GRK5
	TCN2	GRM2
	CLIC2	GRM3
	TRAIP	GRM5
	SCN2A	GRM7
	UNC80	GRM8
	CCDC115	GRPR
	TANGO2	GSDMB
	TRIP4	GSDMC
	ASCC1	GSG1L
	EMC1	GSN
	EMC1	GSPT1
	FGFR1	GSS
	PIGG	GSTM1
	GTF2E2	GSTM3
	SMG9	GSTP1
	PDE10A	GSTT1
	TBCK	GTF2I
	TELO2	GTF2IRD1
	RERE	GUSBL1
	ITPR1	GYPC
	ITPR1	GZMB
	TRMT10C	H1F0
	GNB1	H2AFV
	FLAD1	H2AFY
	SAMD9L	H2AFY2
	TKT	HAMP
	FRRS1L	HAPLN4
	SMO	HARS
		HAT1
		HAVCR2
		HBD
		HCFC1
		HCG26
		HCK
		HCLS1
		HDAC6
		HDC
		HDGFRP2
		HDLBP
		HEBP2
		HERC2P4
		HERC6
		HES4
		HES6
		HEY1
		HEY2
		HGF
		HIGD2A
		HINT1
		HIPK2
		HIRIP3
		HIST1H1A
		HIST1H1C
		HIST1H2AE
		HIST1H2AG
		HIST1H2AH
		HIST1H2BD
		HIST1H2BJ
		HIST1H2BK
		HIST1H3D
		HIST1H3H
		HIST1H4I
		HIST2H2AA3
		HIST2H2AC
		HIST2H2BE
		HIST2H3C
		HKR1
		HLA-A
		HLA-B
		HLA-DQA1
		HLA-DQB1
		HLA-DRB1
		HLA-DRB4
		HLA-G
		HLA-H
		HLA-K
		HLTF
		HMBOX1
		HMG20B
		HMGA2
		HMGB1
		HMGB3P1
		HMGCS1
		HMGN3
		HMHA1
		HNF1B
		HNMT
		HNRNPA0
		HNRNPD
		HNRNPF
		HNRNPU
		HNRPH2
		HNRPLL
		HOMER1
		HOPX
		HOXA1
		HOXD1
		HPRT1
		HPX
		HRAS
		HS3ST3B1
		HS3ST5
		HS6ST2
		HSD3B7
		HSP90AA1
		HSP90B1
		HSPA1A
		HSPA1B
		HSPA1L
		HSPA6
		HSPA9B
		HSPB1
		HSPB2
		HSPB3
		HSPB6
		HSPB8
		HSPBP1
		HSPC159
		HTATIP2
		HTR1B
		HTR2A
		HTR2C
		HTR3A
		HTR3C
		HTR3E
		HTR4
		HTR5A
		HVCN1
		HYLS1
		ICA1
		ICAM1
		ID3
		IDH3B
		IDH3G
		IDI1
		IER3
		IER5L
		IFI16
		IFIT3
		IFITM1
		IFITM2
		IFITM3
		IFNG
		IFT81
		IGBP1
		IGDCC3
		IGF2
		IGFBP4
		IGFBP5
		IGFBP7
		IGFBPL1
		IGHA2
		IGHD
		IGHM
		IGHMBP2
		IGHV3OR16-13
		IGL@
		IGLL1
		IGLL3P
		IKBIP
		IKZF1
		IL12A
		IL-13
		IL17A
		IL17RB
		IL18R1
		IL1B
		IL1R1
		IL1R2
		IL1RAPL1
		IL1RAPL2
		IL20RB
		IL21R
		IL23A
		IL28RA
		IL2RB
		IL32
		IL34
		IL4R
		IL5
		IL6
		IL6ST
		IL8
		IMMP2L
		INA
		INCENP
		ING3
		INMT
		INPP1
		INPP4B
		INPP5B
		INPP5D
		INPPL1
		INSM2
		INTS1
		INTS6
		INTU
		IQCE
		IQCF1
		IQCF2
		IQGAP2
		IQGAP3
		IQSEC2
		IRAK1
		IRF2BP2
		ISG15
		ISLR2
		ISOC1
		ITCH
		ITGA11
		ITGA2
		ITGA2B
		ITGA4
		ITGA5
		ITGAD
		ITGAM
		ITGAX
		ITGB1
		ITGB1BP1
		ITGB2
		ITGB3
		ITGB5
		ITGB7
		ITIH2
		ITIH4
		ITPKA
		ITPKB
		ITPR1
		ITSN2
		JAK1
		JAKMIP1
		JARID2
		JDP2
		JMJD1C
		JMJD6
		JUN
		JUNB
		KALRN
		KANK1
		KATNA1
		KATNAL2
		KAZ
		KBTBD10
		KCNA5
		KCNB1
		KCNB2
		KCNC1
		KCND1
		KCND2
		KCND3
		KCNE1L
		KCNG1
		KCNH3
		KCNH4
		KCNIP4
		KCNJ16
		KCNK12
		KCNMA1
		KCNMB1
		KCNMB2
		KCNMB4
		KCNN3
		KCNN4
		KCNS1
		KCNT1
		KCNT2
		KCTD12
		KDM4C
		KDM5C
		KDM6B
		KHNYN
		KIAA0100
		KIAA0101
		KIAA0182
		KIAA0232
		KIAA0317
		KIAA0319
		KIAA0368
		KIAA0427
		KIAA0491
		KIAA0528
		KIAA0556
		KIAA0649
		KIAA0664
		KIAA0664L3
		KIAA0913
		KIAA1324L
		KIAA1370
		KIAA1432
		KIAA1462
		KIAA1549
		KIAA1797
		KIAA1949
		KIAA1967
		KIF17
		KIF18B
		KIF1B
		KIF1C
		KIF2A
		KIF5A
		KIFC2
		KIR3DL3
		KIRREL3
		KIT
		KLF10
		KLF15
		KLF6
		KLF7
		KLHDC7A
		KLHL21
		KLHL24
		KLHL36
		KLHL5
		KLHL6
		KLHL8
		KLRC3
		KLRF1
		KLRK1
		KNDC1
		KNG1
		KRAS
		KRBA1
		KRT1
		KRT6A
		KRT75
		KRT80
		KRTAP9-3
		L1CAM
		L1TD1
		L3MBTL1
		L3MBTL2
		LACTB2
		LAMA5
		LAMB1
		LAMB2
		LAMB4
		LAMC3
		LANCL1
		LAPTM5
		LARGE
		LARP2
		LARP4B
		LASP1
		LASS6
		LAT
		LATS2
		LCK
		LCMT1
		LCN10
		LCN15
		LCP1
		LCP2
		LDHD
		LEF1
		LEKR1
		LEMD3
		LEPR
		LGALS14
		LGALS3
		LGALS3BP
		LGI3
		LGR4
		LHB
		LHFPL3
		LHX6
		LHX8
		LIFR
		LIME1
		LIMK1
		LIMK2
		LINGO2
		LIPE
		LITAF
		LLGL1
		LMO2
		LMO3
		LMO4
		LMTK3
		LMX1B
		LOC100132735
		LOC100190986
		LOC100506881
		LOC153684
		LOC283788
		LOC285423
		LOC348840
		LOC388955
		LOC400986
		LOC401354
		LOC728724
		LOC729082
		LOC91316
		LPHN1
		LPHN2
		LRBA
		LRFN4
		LRFN5
		LRP1
		LRP1B
		LRP2
		LRP4
		LRP5L
		LRRC1
		LRRC32
		LRRC42
		LRRC8B
		LRRC8D
		LRRIQ1
		LRRK1
		LRRN3
		LRRTM3
		LRRTM4
		LSM3
		LTBP1
		LUM
		LUZP1
		LY6G6F
		LY96
		LYN
		LYPD1
		LYPLAL1
		LYRM5
		LYSMD4
		LZTFL1
		LZTS2
		MACC1
		MACROD2
		MADD
		MAGI1
		MAGOH
		MAGT1
		MAL2
		MAN2A1
		MANSC1
		MAOA
		MAOB
		MAP1A
		MAP1LC3A
		MAP2
		MAP2K1
		MAP3K12
		MAP3K13
		MAP3K6
		MAP4
		MAP7D2
		MAPK1
		MAPK10
		MAPK13
		MAPK3
		MAPK7
		MAPK9
		MAPRE2
		2021-03-10
		2021-03-02
		MARK1
		MARK2
		MASP2
		MATK
		MATR3
		MAX
		MBD1
		MBD2
		MBD3
		MBD4
		MBD5
		MBP
		MBTPS1
		MC1R
		MCAM
		MCF2
		MCL1
		MCM2
		MCM7
		MCOLN3
		MCPH1
		MDGA2
		MDH1
		MDH1B
		MDM2
		MDN1
		ME3
		MECP2
		MED12
		MED13L
		MED17
		MEF2C
		MEG3
		MEGF11
		MERTK
		MEST
		MET
		METRN
		METTL14
		MEX3D
		MFGE8
		MFRP
		MFSD6
		MFSD6L
		MGAT4C
		MGC33846
		MGC40069
		MGC42105
		MGC99813
		MGP
		MGST1
		MIA
		MIB1
		MIB2
		MICALCL
		MID1
		MIRH1
		MKI67
		MKKS
		MKL2
		MKNK2
		MLL
		MLL3
		MLL5
		MLLT4
		MMEL1
		MMP8
		MMRN2
		MOBKL1B
		MOBKL2B
		MOBKL3
		MORC3
		MPDZ
		MPHOSPH8
		MPP1
		MPP6
		MR1
		MRAP2
		MRPL50
		MRPS26
		MRPS30
		MRS2
		MSH4
		MSH6
		MSI2
		MSN
		MST1R
		MST4
		MSX1
		MT1A
		MT1IP
		MT1X
		MT2A
		MT-COI
		MT-CYB
		MTF1
		MTFMT
		MTHFD2
		MTHFR
		MTHFS
		MT-L2
		MTMR12
		MTMR2
		MTMR9
		MT-ND1
		MT-ND2
		MT-ND3
		MT-ND4
		MT-ND5
		MTNR1A
		MTNR1B
		MTP18
		MT-RNR
		MTRR
		MTSS1
		MT-TQ
		MT-TR
		MUC16
		MUC4
		MUM1L1
		MYADM
		MYB
		MYBBP1A
		MYBL1
		MYBPC1
		MYBPC3
		MYBPHL
		MYCBP2
		MYH10
		MYH11
		MYH14
		MYH9
		MYLIP
		MYO16
		MYO18A
		MYO1A
		MYO1D
		MYO3B
		MYO5A
		MYO5B
		MYO7A
		MYO7B
		MYOF
		MYOG
		MYOM2
		MYOZ3
		MYST1
		MYT1L
		NAA25
		NAA38
		NAA40
		NAB2
		NACA
		NAGLU
		NAGPA
		NANOG
		NAP1L5
		NAPB
		NAPG
		NAPRT1
		NAT6
		NAV2
		NBEA
		NBEAL1
		NBPF10
		NBPF20
		NCALD
		NCAM
		NCAPD2
		NCDN
		NCKAP1
		NCOA1
		NCOA3
		NCOA6
		NCR3
		NCRNA00095
		NDFIP1
		NDP
		NDRG2
		NDST4
		NDUFA4
		NDUFA5
		NECAB3
		NEDD4L
		NEFH
		NEFL
		NEFM
		NEGR1
		NELL1
		NELL2
		NETO2
		NEUROD6
		NF1
		NFASC
		NFIA
		NFIB
		NFIX
		NFKB1
		NFKB2
		NFKBIZ
		NGB
		NGEF
		NGF
		NGFRAP1
		NGFRAP1L1
		NHS
		NID1
		NINJ1
		NIPA1
		NIPA2
		NIPBL
		NIPSNAP1
		NISCH
		NKAIN2
		NKAIN4
		NKG7
		NLGN1
		NLGN3
		NLGN4X
		NLGN4Y
		NLRP11
		NLRX1
		NME4
		NME5
		NME6
		NMNAT2
		NMT2
		NNT
		NOLC1
		NOS1
		NOS1AP
		NOS2
		NOSTRIN
		NOTCH2
		NOTCH3
		NOV
		NOVA1
		NOVA2
		NOX4
		NOXA1
		NP
		NPAS2
		NPAS4
		NPFFR2
		NPPA
		NPRL3
		NPTX2
		NPY
		NPY1R
		NPY5R
		NQO1
		NR2F1
		NR2F2
		NR3C1
		NR3C2
		NR4A2
		NR4A3
		NR5A2
		NRCAM
		NRG2
		NRGN
		NRIP3
		NRN1
		NRP1
		NRP2
		NRXN1
		NRXN2
		NSD1
		NSDHL
		NSF
		NSFL1C
		NSUN6
		NSUN7
		NTF3
		NTF4
		NTM
		NTNG1
		NTRK1
		NTRK2
		NTRK3
		NTS
		NTSR2
		NUAK1
		NUDCD2
		NUDCD3
		NUDT14
		NUDT17
		NUFIP2
		NUMBL
		NUP133
		NUP98
		OAF
		OAS1
		OAZ2
		OBSL1
		OCRL
		OGDHL
		OGT
		OLA1
		OLR1
		OMG
		OPHN1
		OPLAH
		OPN3
		OPRK1
		OPRL1
		OPRM1
		OR10Z1
		OR11L1
		OR2D2
		OR2L13
		OR2W3
		OR5AC2
		OR6N2
		OR8H1
		ORAI3
		ORM1
		ORM2
		OSBP2
		OSBPL6
		OSBPL8
		OSGIN2
		OSM
		OSMR
		OTX1
		OVGP1
		OXR1
		OXTR
		P2RX5
		P2RY4
		P4HA1
		P4HA2
		PABPC1
		PACS2
		PAEP
		PAFAH1B1
		PAG1
		PAH
		PAIP1
		PAK1
		PAK6
		PALLD
		PAM
		PANX2
		PAQR4
		PAQR8
		PARK2
		PARM1
		PARP3
		PAX3
		PAX5
		PAX6
		PBRM1
		PBX2
		PCBP4
		PCDH10
		PCDH11X
		PCDH11Y
		PCDH19
		PCDH20
		PCDH7
		PCDHA13
		PCDHB16
		PCDHB4
		PCNT
		PCNX
		PCNXL2
		PCOLCE
		PCP4
		PCSK1
		PCSK2
		PCYT1B
		PDCD1
		PDCD6
		PDE1B
		PDE4A
		PDE4B
		PDE4DIP
		PDE7B
		PDE8A
		PDE8B
		PDGFD
		PDGFRA
		PDGFRB
		PDIA6
		PDK4
		PDLIM4
		PDLIM5
		PDPR
		PDXDC1
		PDYN
		PDZD4
		PELI3
		PER1
		PEX7
		PFDN5
		PFKP
		PGAP1
[truncated: 1,051 more rows]
